# Supplementary material
Source: Research Square preprint supplement (doi:10.21203/rs.3.rs-9653111/v1)

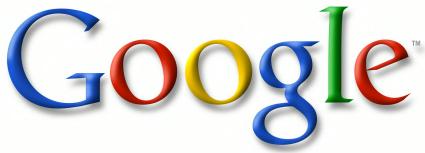

This is a digital copy of a book that was preserved for generations on library shelves before it was carefully scanned by Google as part of a project to make the world's books discoverable online.

It has survived long enough for the copyright to expire and the book to enter the public domain. A public domain book is one that was never subject to copyright or whose legal copyright term has expired. Whether a book is in the public domain may vary country to country. Public domain books are our gateways to the past, representing a wealth of history, culture and knowledge that's often difficult to discover.

Marks, notations and other marginalia present in the original volume will appear in this file - a reminder of this book's long journey from the publisher to a library and finally to you.

### Usage guidelines

Google is proud to partner with libraries to digitize public domain materials and make them widely accessible. Public domain books belong to the public and we are merely their custodians. Nevertheless, this work is expensive, so in order to keep providing this resource, we have taken steps to prevent abuse by commercial parties, including placing technical restrictions on automated querying.

We also ask that you:

- + *Make non-commercial use of the files* We designed Google Book Search for use by individuals, and we request that you use these files for personal, non-commercial purposes.
- + *Refrain from automated querying* Do not send automated queries of any sort to Google's system: If you are conducting research on machine translation, optical character recognition or other areas where access to a large amount of text is helpful, please contact us. We encourage the use of public domain materials for these purposes and may be able to help.
- + *Maintain attribution* The Google "watermark" you see on each file is essential for informing people about this project and helping them find additional materials through Google Book Search. Please do not remove it.
- + *Keep it legal* Whatever your use, remember that you are responsible for ensuring that what you are doing is legal. Do not assume that just because we believe a book is in the public domain for users in the United States, that the work is also in the public domain for users in other countries. Whether a book is still in copyright varies from country to country, and we can't offer guidance on whether any specific use of any specific book is allowed. Please do not assume that a book's appearance in Google Book Search means it can be used in any manner anywhere in the world. Copyright infringement liability can be quite severe.

### About Google Book Search

Google's mission is to organize the world's information and to make it universally accessible and useful. Google Book Search helps readers discover the world's books while helping authors and publishers reach new audiences. You can search through the full text of this book on the web at <http://books.google.com/>



## A propos de ce livre

Ceci est une copie numérique d'un ouvrage conservé depuis des générations dans les rayonnages d'une bibliothèque avant d'être numérisé avec précaution par Google dans le cadre d'un projet visant à permettre aux internautes de découvrir l'ensemble du patrimoine littéraire mondial en ligne.

Ce livre étant relativement ancien, il n'est plus protégé par la loi sur les droits d'auteur et appartient à présent au domaine public. L'expression "appartenir au domaine public" signifie que le livre en question n'a jamais été soumis aux droits d'auteur ou que ses droits légaux sont arrivés à expiration. Les conditions requises pour qu'un livre tombe dans le domaine public peuvent varier d'un pays à l'autre. Les livres libres de droit sont autant de liens avec le passé. Ils sont les témoins de la richesse de notre histoire, de notre patrimoine culturel et de la connaissance humaine et sont trop souvent difficilement accessibles au public.

Les notes de bas de page et autres annotations en marge du texte présentes dans le volume original sont reprises dans ce fichier, comme un souvenir du long chemin parcouru par l'ouvrage depuis la maison d'édition en passant par la bibliothèque pour finalement se retrouver entre vos mains.

## Consignes d'utilisation

Google est fier de travailler en partenariat avec des bibliothèques à la numérisation des ouvrages appartenant au domaine public et de les rendre ainsi accessibles à tous. Ces livres sont en effet la propriété de tous et de toutes et nous sommes tout simplement les gardiens de ce patrimoine. Il s'agit toutefois d'un projet coûteux. Par conséquent et en vue de poursuivre la diffusion de ces ressources inépuisables, nous avons pris les dispositions nécessaires afin de prévenir les éventuels abus auxquels pourraient se livrer des sites marchands tiers, notamment en instaurant des contraintes techniques relatives aux requêtes automatisées.

Nous vous demandons également de:

- + *Ne pas utiliser les fichiers à des fins commerciales* Nous avons conçu le programme Google Recherche de Livres à l'usage des particuliers. Nous vous demandons donc d'utiliser uniquement ces fichiers à des fins personnelles. Ils ne sauraient en effet être employés dans un quelconque but commercial.
- + *Ne pas procéder à des requêtes automatisées* N'envoyez aucune requête automatisée quelle qu'elle soit au système Google. Si vous effectuez des recherches concernant les logiciels de traduction, la reconnaissance optique de caractères ou tout autre domaine nécessitant de disposer d'importantes quantités de texte, n'hésitez pas à nous contacter. Nous encourageons pour la réalisation de ce type de travaux l'utilisation des ouvrages et documents appartenant au domaine public et serions heureux de vous être utile.
- + *Ne pas supprimer l'attribution* Le filigrane Google contenu dans chaque fichier est indispensable pour informer les internautes de notre projet et leur permettre d'accéder à davantage de documents par l'intermédiaire du Programme Google Recherche de Livres. Ne le supprimez en aucun cas.
- + *Rester dans la légalité* Quelle que soit l'utilisation que vous comptez faire des fichiers, n'oubliez pas qu'il est de votre responsabilité de veiller à respecter la loi. Si un ouvrage appartient au domaine public américain, n'en déduisez pas pour autant qu'il en va de même dans les autres pays. La durée légale des droits d'auteur d'un livre varie d'un pays à l'autre. Nous ne sommes donc pas en mesure de répertorier les ouvrages dont l'utilisation est autorisée et ceux dont elle ne l'est pas. Ne croyez pas que le simple fait d'afficher un livre sur Google Recherche de Livres signifie que celui-ci peut être utilisé de quelque façon que ce soit dans le monde entier. La condamnation à laquelle vous vous exposeriez en cas de violation des droits d'auteur peut être sévère.

## À propos du service Google Recherche de Livres

En favorisant la recherche et l'accès à un nombre croissant de livres disponibles dans de nombreuses langues, dont le français, Google souhaite contribuer à promouvoir la diversité culturelle grâce à Google Recherche de Livres. En effet, le Programme Google Recherche de Livres permet aux internautes de découvrir le patrimoine littéraire mondial, tout en aidant les auteurs et les éditeurs à élargir leur public. Vous pouvez effectuer des recherches en ligne dans le texte intégral de cet ouvrage à l'adresse <http://books.google.com>

A

687,900

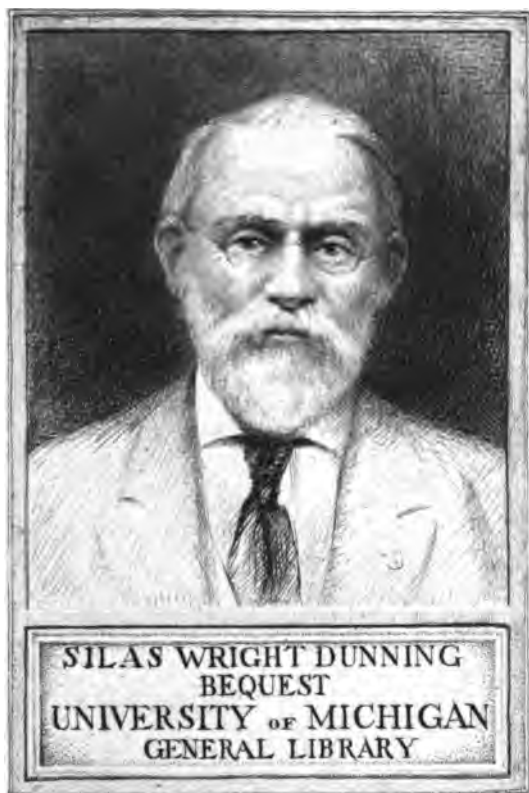

SILAS WRIGHT DUNNING  
BEQUEST  
UNIVERSITY OF MICHIGAN  
GENERAL LIBRARY





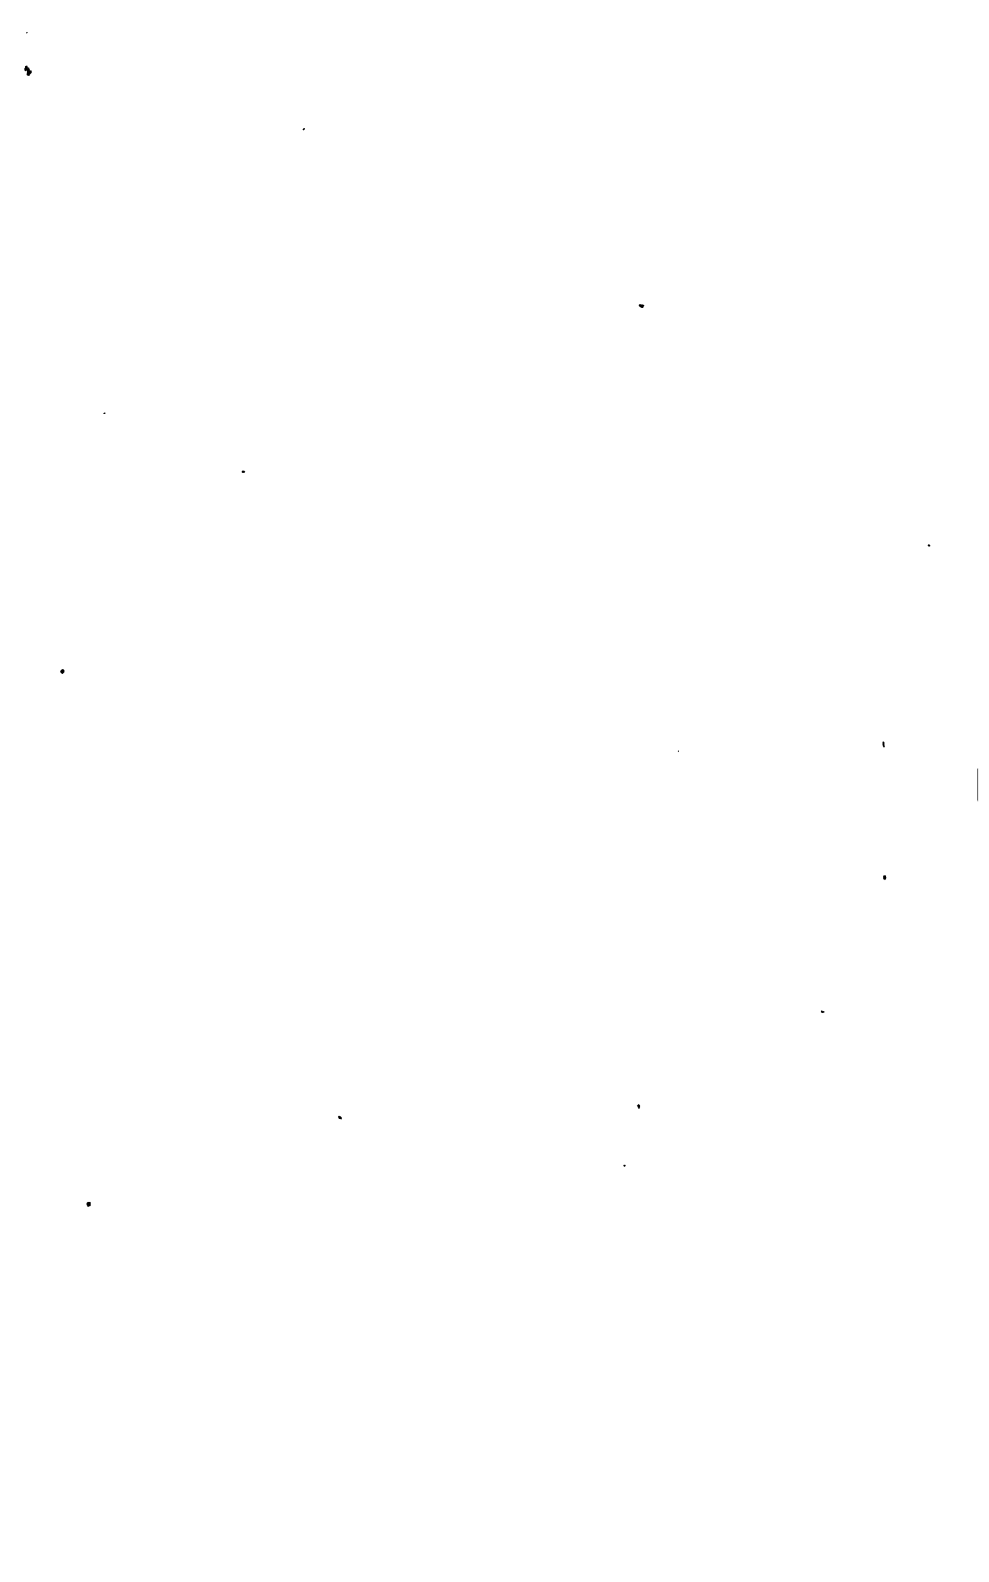

LA

# REVUE OCCIDENTALE 7

PHILOSOPHIQUE /

SOCIALE ET POLITIQUE



LA

# REVUE OCCIDENTALE

PHILOSOPHIQUE, SOCIALE ET POLITIQUE

ORGANE DU POSITIVISME

PARAISANT TOUS LES DEUX MOIS

DIRECTEUR : PIERRE LAFFITTE

ORDRE ET PROGRES

---

SECONDE SÉRIE — TOME XIX

108 — 1896

DEUXIÈME SEMESTRE

---

PARIS  
SOCIÉTÉ POSITIVISTE

10, RUE MONSIEUR-LE-PRINCE, 10

—  
1896

B  
831  
.A2  
R44  
ser. 2  
v. 14

## L'INCONNAISSABLE

(Traduit de l'anglais par L. BARADUC).

---

Il y a peu de points dans la philosophie de M. Spencer qui aient excité un intérêt plus général que sa prétention d'avoir résolu le conflit entre la religion et la science en assignant la région de l'inconnaissable comme le terrain commun sur lequel elles peuvent se rencontrer. Il est difficile de contester la proposition fondamentale qui lui sert de base. D'une part, en effet, la croyance religieuse dans tous les temps et dans tous les pays a toujours eu pour objet des dogmes que, de toute évidence, les facultés humaines ne peuvent ni vérifier ni contrôler et, d'un autre côté, tout homme de science possédant la plus petite dose de sens commun a toujours considéré que la science avait une portée limitée, bien qu'on ne puisse pas toujours assigner à ses limites une position précise et qu'elles aient été plusieurs fois déplacées. Chaque extension de l'horizon scientifique a révélé des régions inexplorées encore plus vastes et dont tout d'abord on ne soupçonnait pas l'existence. Le sentiment qu'à l'homme de son ignorance a marché du même pas que sa science. On peut donc admettre le point de départ. La science admet l'inconnaissable. La religion, ou du moins les formes de religion qui ont jusqu'à présent dominé l'esprit des hommes, ont beaucoup de points communs avec l'inconnaissable.

Mais où ce premier pas nous conduira-t-il ? Servira-t-il de trait d'union entre la science et la religion ? Résoudra-t-il la controverse entre la foi et la raison qui dure depuis le temps de la lutte spirituelle de saint Augustin, qui a donné naissance

à l'Inquisition, à la Réforme, à la guerre de Trente-Ans, au meurtre de Calas et à la croisade de Voltaire en faveur de la tolérance? Satisfera-t-il les aspirations spirituelles des générations futures? A toutes ces questions, nous devons répondre « Non », pour la bonne et évidente raison que la religion, telle que nous la voyons et la connaissons, malgré ses rapports avec l'inconnaissable, sa source et son but, a eu des relations plus profondes, plus constantes, plus variées avec les choses et avec la vie humaine. C'est de la vie et des devoirs de l'homme que Confucius, les théocrates de l'Egypte et de l'Inde, Moïse, saint Paul, Mahomet se sont surtout préoccupés.

Lisez un traité quelconque de théologie catholique, la *Somme* de saint Thomas d'Aquin, par exemple. Combien de pages de ce grand ouvrage sont-elles remplies de recherches transcendantes sur les attributs de l'Être suprême? Une sur cent peut-être. Le reste contient des conseils sages et réfléchis sur la conduite de la vie privée et publique, sur le règlement des passions, le gouvernement de la famille et de l'Etat, la sauvegarde du lien du mariage, l'ordination des prêtres, l'observation de certaines formes dans les sacrements et dans les cérémonies du culte. Plus loin, on traite de l'action de la force surnaturelle, non pas comme d'une chose qui se passe dans une sphère extra-terrestre, mais comme d'une série d'événements qui se sont produits dans ce bas monde et qui peuvent être prouvés ou réfutés comme tous les autres faits de la vie humaine. Le conflit entre la religion et la science ne roule pas du tout — ou du moins dans une très faible mesure seulement — sur les choses transcendantes qui se passèrent avant le commencement du monde, mais sur de prétendus faits historiques, tels que la naissance, la résurrection et l'ascension miraculeuse de Jésus. Ces faits sont prouvés d'une manière qui satisfait les uns, mais non les autres.

Ainsi donc, l'existence d'un univers inconnaissable et supra-sensuel, que le savant aussi bien que le théologien est prêt à reconnaître, n'est pas une raison suffisante d'espérer le règlement des controverses qui existent entre eux. Ce n'est



pas sur cette question que roule la controverse. L'arène du conflit n'est pas située dans un monde extérieur et invisible, mais bien ici-bas, sur cette terre. Pouvons-nous, oui ou non, regarder les faits de la vie politique et morale de l'homme comme le résultat d'une évolution régulière de manière que, les premiers termes de la série étant connus, les derniers puissent être conjecturés avec une certaine dose de probabilité ? Devons-nous, au contraire, les considérer, ainsi que dans les anciens temps on le faisait pour les faits de la nature physique, comme soumis aux interventions imprévues d'une volonté surnaturelle. Tel est le problème à résoudre. Le débat consistera, dans le siècle prochain, comme il a consisté dans le nôtre, à savoir qui, de Dieu ou de l'Humanité, dominera la vie spirituelle et sociale de l'homme.

S'il en est ainsi, on doit considérer comme peu justifiée la prétention de M. Spencer d'avoir réconcilié les forces opposées de la religion et de la science. Mais devons-nous en inférer que la conception qu'il met en avant comme le facteur essentiel de la religion, la pensée de l'infini inconnu qui nous entoure, doit être rejetée comme sans valeur ? Cette conception fut, en effet, celle de beaucoup de positivistes et spécialement de ceux qui se laissaient absorber d'une manière exclusive par le côté politique de la doctrine. Mais certaines considérations nous conduisent dans une direction différente. L'une d'elles est contenue dans le mot célèbre du grand penseur Kant : « Il y a dans le monde deux spectacles qui nous émeuvent : le ciel étoilé au-dessus de nos têtes et le sentiment du devoir dans le cœur de l'homme ». Dans le tumulte de la vie pratique, au milieu du grouillement des cités populeuses, devant le conflit toujours imminent des grandes puissances et la menace de voir renverser tout ce que le travail et le génie ont lentement édifié, il est difficile de voir et de penser à autre chose qu'aux luttes, aux souffrances et aux aspirations de ceux qui nous entourent. Mais, par intervalles, nous sommes attirés vers la solitude. Il y a des moments où le désir de quitter les sentiers de la foule pour la montagne ou l'océan devient irrésistible. Et, même lorsqu'on ne peut pas le satisfaire, le mouvement quotidien

du ciel place sous les yeux de chacun de nous le soleil et les étoiles.

Lorsqu'on écrira l'histoire des deux derniers siècles, on devra mettre au premier plan un de leurs traits les plus frappants. En raison directe du déclin de la foi théologique grandit le culte de la nature. L'amour des fleurs qui se montre à chaque fenêtre de maison à la ville ou à la campagne, le désir pour les libres espaces où l'herbe est dorée par les rayons du soleil, la concentration de l'art du peintre sur le paysage, l'émotion humaine en présence de l'air, de la montagne et de l'océan, par dessus tout, l'influence imperceptible de la musique atteignant à des profondeurs où l'âme ne peut atteindre — toutes ces choses ont lentement transformé la vie moderne et ont contrebalancé les forces destructives et stérilisantes de la révolution, de la désorganisation industrielle, de la soif du luxe et du plaisir. Les vers de Wordsworth en revoyant l'abbaye de Tintern, de Byron sur Manfred, au milieu des Alpes, les poésies lyriques de Shelley, sur le *Nuage* et le *Vent d'Ouest*, toutes ces choses resteront lorsque l'énergie perdue et les luttes futiles du XIX<sup>e</sup> siècle seront devenues un mauvais rêve à moitié oublié.

Tout ce côté de la vie et de la pensée se rapporte à l'une des plus remarquables conceptions de la « Politique positive » de Comte, l'union du Positivisme et du Fétichisme.

Le Fétichisme est la philosophie spontanée de l'enfance — de l'enfance de chacun de nous aussi bien que de celle de la race à laquelle nous appartenons. Par une impulsion instinctive, nous personnifions les choses du monde où nous vivons, celles qui nous touchent de près, celles qui provoquent notre antipathie ou notre amour. Telle fut, en des phases aux formes multiples, la foi simpliste dont se contentèrent les tribus primitives. Elle est étroitement liée à ces premières et si importantes époques du progrès humain dont l'histoire ne fait pas mention. Elle établit les tribus errantes dans une position fixe à la surface de la terre et posa ainsi les premiers fondements de la vie civique. En dernier lieu, ces dogmes simplistes furent éclipsés mais non déracinés par une foi nouvelle qui grandissait à mesure que se formaient

de vastes agrégations d'hommes. Et, comme on sentait la nécessité d'une loi et d'un gouvernement plus forts et plus perfectionnés, on crut en des êtres invisibles qui ne faisaient pas partie du monde qui nous entoure, mais qui existaient en dehors de lui et dont chacun régissait un département spécial de la nature. Plus tard après de longues périodes de civilisation polythéique, la république des dieux donna naissance à un monarque unique et tout puissant. Mais le règne des dieux est désormais fini. Les hommes vont assister bientôt à la réconciliation de l'intelligence et de l'amour sous la bienfaisante prépondérance de l'Humanité.

Pendant la longue domination des dieux, le fétichisme avait toujours continué d'exister comme une force cachée. Le culte des autels particuliers, des dieux du foyer, des pierres sacrées, des reliques des saints, des tombes de ceux que nous avons respectés et aimés, ne s'éteignit jamais. A mesure que la théologie avait décliné, ce culte avait été pratiqué avec plus de zèle que jamais et cela sur la frontière même des églises officielles, non moins qu'en dehors d'elles. Dans presque chaque église d'Angleterre, on célèbre maintenant la fête des moissons. Sous le Positivisme, tous ces sentiments seront appelés à une vie nouvelle. Notre but est le suivant : réunir en une seule la forme primitive et la forme ultime de la religion. Les religions déistes intermédiaires auront eu leur utilité en développant les facultés intellectuelles et en ordonnant les forces civiques des hommes ; ce but rempli, elles ne seront plus que des souvenirs du passé.

Ces idées ont reçu leur forme définitive dans la préface du dernier ouvrage de Comte, *La Synthèse subjective*. L'Humanité, résumant en elle les pensées, les énergies et les sympathies de tous ceux qui dans tous les temps se sont consacrés au service de l'homme, occupe la première place et demeure le premier objet du respect des hommes. Mais à l'Humanité, il faut ajouter, comme dans l'immortel poème lyrique de Shelley, *Prométhée*, la terre dont les énergies physiques ont depuis de longs siècles construit pour l'homme une demeure appropriée, et aussi les vastes étendues inconnues de l'espace, siège de la destinée humaine. Le sentiment peut

atteindre là où l'action est impuissante. L'esprit de celui qui contemple l'éclat mourant d'un coucher de soleil d'été ou le dôme insondable d'un ciel de minuit peut, comme l'esprit de Dante, se sentir rempli de « l'amour qui fait mouvoir le ciel et les étoiles. »

D<sup>r</sup> BRIDGES.

Extrait de la « **Positivist Review** ».

---

# COMTE ET LE PROTESTANTISME

(Traduction de M. A. RICHER.)

---

Comte a eu la bonne fortune de n'être pas trop chargé de fautes qui n'étaient point siennes, bonne fortune qu'il partage avec plusieurs autres grands démonstrateurs. Cependant on entend dire parfois que, selon la propre expression de John Stuart Mill, « son appréciation du protestantisme a été incomplète » (Voir « Aug. Comte et le Positivisme », p. III). Sur ce sujet nous aurions quatre choses à exposer à propos : 1° des relations de Comte avec le révérend Daniel Encontre; 2° de son assignation des Grands Protestants à certaines places du Calendrier Historique; 3° de son projet d'une Ligue Religieuse; 4° du culte de la Destinée.

1° Etant écolier à Montpellier, de quatorze à dix-sept ans, Comte reçut des leçons de mathématiques de Daniel Encontre, professeur de théologie dogmatique, doyen de la Faculté de théologie protestante à Montauban, homme âgé à cette époque de plus de cinquante ans. Encontre inspira à son élève un tel respect que, quarante-deux ans plus tard, Comte dédiait à la mémoire de son maître son dernier volume pour servir d'introduction à la *Synthèse subjective*. Voici deux extraits de cette dédicace qui montreront combien, pendant toute sa vie, Comte subit profondément l'influence personnelle du noble clergyman protestant qui éclaira sa jeunesse.

« La postérité me permettra de vous qualifier de maître, puisque la tendance philosophique de votre enseignement scientifique fit spontanément surgir le premier éveil de ma vocation intellectuelle et même sociale. Vu la culture pleinement encyclopédique que vous aviez librement procurée à votre esprit, également apte à goûter l'art et la science, vos leçons mathématiques eurent une puissance que vos moindres élèves n'ont jamais oubliée. J'ose aujourd'hui proclamer, d'après une

expérience décisive, que vous fûtes, à votre insu, le premier professeur de votre temps, quoique votre noble modestie vous ait toujours laissé sur un théâtre trop obscur.

Je dois maintenant compléter cette indication en l'étendant à votre valeur morale, autant que d'insuffisants contacts m'ont permis de constater combien était fondée l'estime universelle que ma ville natale accordait autant à vos vertus privées et publiques qu'à vos divers talents. Une modestie sincèrement poussée jusqu'à l'humilité, dans un siècle spontanément dominé par l'orgueil et la vanité, suffirait à tout vrai connaisseur pour sentir que votre cœur était pleinement digne de votre esprit. »

2° Dans le *Calendrier historique* de Comte, le protestantisme est superbement apprécié pour les services positifs rendus par ses disciples au progrès de l'Humanité, tandis que son rôle destructeur est passé sous silence. C'est ainsi qu'on n'y voit point les noms de Luther, Calvin, Socinius, les fameux chefs destructeurs de la discipline, de la hiérarchie et de la doctrine catholiques, leurs places étant prises par les grandes figures protestantes, Guillaume le Silencieux et Cromwell. Ces deux derniers furent à même, par leurs occupations politiques, de mettre en pratique leur zèle religieux. D'un autre côté, lorsque Comte tomba sur George Fox, chef religieux d'une forme outrée du protestantisme qui perfectionna la doctrine catholique, il commémora de suite sa mémoire, non pour le côté révolutionnaire de la doctrine et de la discipline des Quakers, mais parce qu'ils devançaient véritablement les catholiques par leurs efforts persistants et leurs prédications dévouées, dans le but d'arriver à la paix du monde, cette cause que d'autres sectes devraient avoir à cœur de faire triompher à notre époque. De plus (pour ne prendre seulement que les chefs de semaines), Milton et Newton, tous deux protestants s'il en fut jamais, doivent leurs places à leurs services poétiques et scientifiques envers l'Humanité. Ainsi donc, dans le calendrier de Comte, le protestantisme est justement apprécié d'après ses résultats. Tant qu'il est rétrograde, anarchiste ou stérile, on l'ignore. Tant qu'il est fécond en sciences, arts, politique ou religion, on le loue librement et judicieusement.

« Son succès partiel, dit Comte à la page 368 de son *Catéchisme*, 2<sup>e</sup> édition, doit avoir répondu à d'importants besoins intellectuels ou sociaux. En dépit de sa nature anarchiste, le protestantisme commença par aider au progrès de la science et au développement de l'industrie, car il stimulait l'effort personnel et brisait les mesures oppressives. On lui doit deux révolutions préliminaires, l'une en Hollande, contre la tyrannie étrangère; l'autre en Angleterre, au nom de la réforme nationale. Quoique la dernière fût prématurée et destinée à échouer définitivement, elle n'en révéla pas moins, sous l'admirable dictature de Cromwell, l'inévitable point de départ du progrès occidental. »

3<sup>e</sup> Le protestantisme, quoique destructeur en partie du catholicisme, se contente en général d'une fraction limitée de destruction et demeure assez religieux pour contrôler et diriger l'existence de ses adhérents vers quelque but. En fait, on doit encore le ranger parmi les religions. Il faut le mettre en ligne avec la religion de l'Humanité où les hommes sont classés d'après leur acceptation ou leur rejet de la croyance en un certain Etre, pour le service duquel ils doivent régler leur conduite, devant l'autel duquel ils reconnaissent qu'ils doivent, en un culte raisonnable, se présenter comme « sacrifices vivants ». Comte revient dans son *Appel aux conservateurs* (p. 118) sur l'aptitude du Positivisme à « liguer toutes les âmes religieuses dans une activité combinée contre les instincts irrégieux ». Il regardait comme de la plus haute importance que le monde religieux, évitant autant que possible les querelles entre sectes, se présentât en un ensemble plein de cohésion contre l'irrégion, à tel point qu'il désirait la formation d'une ligue religieuse, constituée par les positivistes unis aux catholiques, aux protestants et aux musulmans. Il fit même, par l'intermédiaire de M. Sabatier, des propositions aux jésuites sur cette question, sans aucun résultat. Ce projet de Comte est évidemment intéressant pour les positivistes anglais qui doivent, sous l'influence de son enseignement, cultiver des vues sympathiques envers l'épiscopat et le puritanisme qui nous entourent. Il faut se rappeler que ces institutions, en dépit de leurs fautes, toutes

lamentables et parfois déshonorantes, sont, dans ce qu'elles ont de meilleur et en accord avec leur idéal, des associations travaillant à la discipline religieuse de l'homme et à son abandon de la vie instinctivement égoïste ou perversie. Il existe à coup sûr des exemples de conduite scandaleuse sur le compte des gens d'église, tout aussi bien que sur celui des gens qui s'avouent irréligieux ; mais cela ne doit inspirer que plus d'humilité au monde religieux, plus de ferveur et de dévotion, et nullement provoquer le découragement ou aliéner la sympathie des adhérents appartenant à d'autres sectes. La nature absolue des doctrines théologiques empêche généralement les protestants de nous accorder la sympathie convenable ; ils ne peuvent guère considérer notre religion comme divinement inspirée. Mais, pour nous, c'est différent. Il faut toujours se souvenir que le protestantisme, comme le catholicisme, le confucianisme ou l'islamisme, n'est en réalité qu'une louable création de l'Humanité, parfaitement adaptée à son temps et à son milieu et que nous devons traiter avec bienveillance, de quelque façon qu'on nous traite en retour. Plus les protestants s'entoureront des enseignements de Comte, plus ils dureront, et plus honorable et complète sera l'abdication du protestantisme en faveur de la religion de l'Humanité, sous le régime de laquelle ses adhérents trouveront une meilleure réalisation de leurs aspirations les plus élevées.

4° Nous pouvons ajouter quelques mots au sujet d'un point de contact possible entre le Positivisme et l'extrême protestantisme, quoique les éléments de ce couple soient tout-à-fait séparés. Mais si l'on considère que toutes les croyances sont des créations de l'Humanité, on ne doit pas être surpris de trouver quelques points communs à celui-ci et au Positivisme. A mesure que le protestantisme s'accuse davantage, la foi en la Bible devient moins absolue, les doctrines du ciel et de l'enfer, de l'Incarnation, de l'expiation et de la Trinité s'évanouissent ; le croyant doit contenter son esprit avec le monde où il vit et se montrer reconnaissant au dieu imaginaire des lois naturelles qui, pense-t-il, lui donna « cette plaisante et anxieuse existence ». Le fait est que ce monde est une fameuse bonne place pour ce genre d'hommes,



fiers, vigoureux et pas trop tendres de cœur, qui accueillent gaiement leurs misères, comme le font nos fougueux jeunes gens pour leurs accidents de jeux. De telles natures ont souvent éprouvé une robuste affection pour les lois naturelles c'est-à-dire pour la Destinée. C'est même elle qui provoqua cette exclamation du psalmiste : « Oh ! combien j'aime ta loi ! »

A mesure que Comte s'entraînait à la piété de la religion de l'Humanité, il étendait son affection au-delà de cette Humanité, jusqu'à la planète qui est sa demeure (que Sophocle appelle la « terre, infatigable, impérissable, commandant aux dieux »), et passait par dessus le « grand Etre », pour arriver au « grand Fétiche ». Ainsi Wordsworth admettait qu'il aimait l'Angleterre surtout parce qu'elle était le « home » de Lucie. Comte sentait augmenter son amour et sa vénération pour la terre, à tel point que ces sentiments devenaient chez lui aussi intenses que ceux d'un poète ou d'un paysan ; de même, sa piété naturelle le poussait à aimer et honorer les lois de la nature qui remplit l'espace. A la Destinée, il se soumettait sans répugnance et même joyeusement, considérant l'espace, le « grand milieu » comme le siège de ses lois.

Cette déférence envers la Destinée, cette heureuse soumission, ce plaisir dans la loi, ont été reprochés à Comte que l'on croyait occupé à construire quelque nouvelle théologie très inférieure, à mesure qu'il trouvait réellement plus en plus de félicité dans sa vie religieuse. Le présent auteur estime qu'ici, comme dans toutes les matières importantes de la vie spirituelle, les audacieuses vues de Comte sont saines et justes ; mais que cette petite partie de la piété positiviste correspond très intimement à ce qui reste de l'adoration de Dieu chez un protestant avancé. Ainsi donc, chez les protestants l'adoration de Dieu tend normalement à devenir cette douce soumission au Destin qui est une des beautés de la piété positiviste, tandis que l'adoration de l'Humanité découle de l'amour de la famille et de la patrie, deux choses qui n'ont pas fait défaut aux protestants.

Charles-Gaskell HIGGINSON.

*Extrait de la « Positivist Review » du 13 Saint-Paul, 108.*

# BULLETIN D'ANGLETERRE

---

## LA TEMPÊTE DE SHAKESPEARE

### CONFÉRENCE FAITE A NEWTON HALL

*Le 15 avril 1894, par M. J. KAINES.*

La fable de ce drame n'est pas longue à conter. La scène est une île déserte habitée par trois personnes : Prospero, le père ; Miranda, la fille, et Caliban, leur serviteur, sorte de rude personnage participant à la fois de l'homme et de la bête, que Prospero a soumis à ses exigences. A l'origine, l'île appartenait à Sycorax, mère de Caliban, et celui-ci considère le nouveau propriétaire, non seulement comme un usurpateur et un intrus, mais aussi comme un maître cruel, d'autant plus qu'il est magicien très puissant. Comment Prospero et sa fille vinrent dans l'île, nous le saurons bientôt de la bouche même du magicien. Pendant que Caliban sert son maître à contre-cœur et chaque fois qu'il désobéit, un certain Ariel (1), esprit très malin comme l'indique son nom, le pince et le pique aux jambes. Cet Ariel est uni à Prospero par les liens de la reconnaissance, ayant été délivré de l'emprisonnement dans un arbre où Sycorax l'avait confiné avant l'arrivée de Prospero dans l'île.

Sycorax étant morte, Ariel punit son fils aussi souvent que cela lui plaît et trouve ainsi une agréable revanche. Tels sont ou ont été les habitants de l'île. Nous verrons aussi qu'elle est visitée par d'autres gens qui y font naufrage, comme cela advint au père et à la fille, douze ans avant. L'histoire de leur malheur est délicieusement racontée par Charles Lamb qui emploie pour son récit, autant qu'il le peut, les propres termes de Shakes-

(1) Ariel, idole des Moabites, est devenu le nom d'un mauvais ange.

peare. En réponse à la question posée par Prospero : « Pouvez-vous vous souvenir de l'époque où vous n'étiez pas encore venu dans cette prison ? Je ne le pense pas, car vous n'aviez même pas alors trois ans. »

— « Mais pardon ! Je puis m'en rappeler, Monsieur », réplique Miranda.

— « Par quel moyen ? » demande Prospero. « Par quelque maison ou quelque personne ? — Dites-moi ce dont vous pouvez vous souvenir, mon enfant. »

MIRANDA. — « Il me semble vaguement me rappeler que je fis un rêve. Mais..., une fois, n'ai-je pas vu quatre ou cinq femmes apparaître devant moi ? »

PROSPERO. — « En effet, et même un plus grand nombre. Comment cela peut-il encore être présent dans votre esprit ? Vous rappelez-vous comment vous vintes ici ? »

MIRANDA. — « Non, Monsieur, je ne me souviens plus d'aucune autre chose. »

PROSPERO. — « Il y a douze ans, j'étais duc de Milan et vous étiez une princesse et ma seule héritière. J'avais un frère plus jeune, dont le nom était Antonio, auquel je confiais tout ; comme je recherchais la solitude et les études sérieuses, je laissais fréquemment le soin de diriger mes affaires de l'Etat à votre oncle, mon frère indigne (car il l'a prouvé depuis). Quant à moi, négligeant toutes les choses de ce bas monde, enterré dans mes livres, je passais tout mon temps à améliorer mon esprit. Mon frère Antonio, étant ainsi en possession de ma puissance, commença à se considérer comme étant le duc lui-même. Les occasions que je lui fournis de se rendre populaire parmi mes sujets éveillèrent en sa perverse nature une ferme ambition de me priver de mon duché, ce qu'il ne tarda pas à accomplir, avec l'aide du roi de Naples, puissant prince qui était mon ennemi. »

MIRANDA. — « Pourquoi donc ne vous détruisirent-ils pas alors ? »

SON PÈRE. — « Mon enfant, on n'osa pas, tellement profond était l'amour que mon peuple me portait. Antonio nous fit mettre à bord d'un bateau et quand nous fûmes à quelques milles au large nous transborda sur une petite barque, sans aucun grément ni voile, ni mât, espérant ainsi nous faire périr. Heureusement, un bon seigneur de ma cour, un certain Gonzalo, qui m'aimait, avait de lui-même placé au fond de la barque, de l'eau, des provisions, des appareils et quelques livres que j'estime plus que mon duché. »

MIRANDA. — O mon père, que de peine j'ai dû vous donner alors ! »

PROSPERO. — « Non, mon amour, vous étiez un petit chérubin qui me protégeait. Vos innocents sourires me firent mieux supporter mes malheurs. Nos aliments durèrent jusqu'au jour de notre débarquement dans cette île déserte et depuis lors, mon plus grand bonheur, Miranda, a été de vous instruire et de vous voir profiter de mes efforts. »

MIRANDA. — « Que le ciel vous remercie, mon cher père, mais dites-moi maintenant, je vous prie, vos raisons pour soulever la tempête ? »

SON PÈRE. — « Sachez donc que, par cette tempête, mes ennemis, le roi de Naples et mon cruel frère, vont faire naufrage sur cette île. »

Sur ces paroles, Prospero touche légèrement sa fille de sa baguette magique et elle tombe de suite endormie.

La tempête soulevée par « l'art trop puissant » de Prospero cause un naufrage. Son frère Antonio, avec Gonzalo, le roi de Naples et son fils Ferdinand, sont jetés au rivage, le roi ne sachant rien du sauvetage de son fils, ni le fils de celui de son père. D'autres gens sont également sauvés qui croient l'île inhabitée, jusqu'au moment où ils découvrent Caliban. Ferdinand aperçoit Miranda ; celle-ci le découvre également et tous les deux tombent épris l'un de l'autre, à la grande satisfaction de Prospero, bien que tout d'abord il affecte le mécontentement de les voir se fréquenter. Miranda possède l'innocente blancheur de l'aurore d'un beau jour, sa douceur et sa pureté. Jamais Shakespeare ne dépeignit une créature plus altruiste, franche et attirante. Ferdinand est à tous égards digne d'elle, ce qui n'est pas peu dire, et il le prouve par l'empire qu'il a sur lui-même, par ses honorables sentiments et son amour désintéressé pour Miranda. Dans le but d'éprouver son amour et d'en connaître la nature, Prospero lui impose une tâche d'une rare difficulté. A l'acte III, scène 1<sup>re</sup>, Shakespeare a écrit une délicieuse scène entre les amants, une de ces scènes d'une grâce et d'une tendresse magiques, que, seul, Shakespeare, est capable de produire. (*Lecture de l'acte III, scène 1<sup>re</sup>.*)

La passion des deux êtres suit joyeusement son cours et l'on prévoit que, en fin de compte, Ferdinand et Miranda vont devenir Roi et Reine de Naples, et que Prospero va être restauré duc de Milan. Pendant ce temps, le magicien se sert d'Ariel pour réveiller les consciences de son frère et d'Alonzo (le Roi), qui con-

tribuèrent à faire bannir Prospero. C'est en ces termes qu'Alonso décrit son remords :

« Oh ! c'est monstrueux ! monstrueux !

Il me semblait que les vagues m'en parlaient dans leur rumeur ;  
Les vents me le mugissaient ; le tonnerre,  
Ce profond et terrible tuyau d'orgue, me prononçait  
Le nom de Prosper. Il annonçait mon trépas.

Aussi mon fils est perdu dans la vase ;

Je le chercherai à des profondeurs où jamais la sonde n'est par-  
Et, là, je m'ensevelirai avec lui dans la boue. » [venue]

Nemesis est venue vers le Roi — pas encore vers Antonio qui répond par moquerie à la question de Sébastien : « Que faites-vous de votre conscience ? » :

— « Mais, Monsieur, où cela git-il ? Si c'était un vautour, je l'aurais aux talons, mais je ne sens point cette déesse dans mon sein. Il y a vingt consciences entre moi et Milan. Qu'elles soient glacées et fondues avant qu'elles n'inquiètent ! »

Deux tristes ivrognes, Stephano et Trinculo prennent complètement possession de l'île (à ce qu'ils pensent), et s'assurent le concours de Caliban en lui donnant à boire. Il est prêt à changer de maîtres, comme on peut le supposer d'après sa haine de Prospero. Jusqu'alors, Caliban n'a pas été avili par le contact de ces formes de la civilisation occidentale réunies sous la rubrique : « Rhum et vraie religion ». A présent, il va connaître ces deux choses et elles lui font beaucoup de bien. Stephano lui donne la bouteille d'eau-de-vie, en disant : « Tenez, venez jurer là-dessus, embrassez le livre, j'en rapporterai bientôt. Jurez ! » Caliban boit, devient ce que l'ivrogne de Trinculo appelle « un monstre gris et hurlant », abandonne le service de Prospero et s'attache comme esclave aux deux fripons. Comme on peut s'y attendre, il leur explique le véritable état des choses, leur dit que Prospero est le maître de l'île, leur montre de quelle façon on peut le tuer et comment sa fille peut devenir la femme ou la maîtresse de Stephano. La civilisation domine bien vite dans les milieux stériles. Ils s'entendent pour le meurtre avec ce même sang-froid que montrent les chrétiens modernes, qu'ils soient Anglais ou Allemands, pour s'emparer d'une île du Pacifique, ou d'une tranche de l'Afrique orientale, dans le but de civiliser les indigènes, ce qui signifie : les corrompre et les exterminer. Shakespeare a merveilleusement personnifié en Trinculo et Stephano le boucanier ou le trafiquant moderne, toujours prêt à renverser l'autorité, à égorger autant qu'il est nécessaire, dans le seul but d'ou-

vrir de nouveaux débouchés au trop-plein de la mère patrie. Quand le trafiquant a accompli cette féroce besogne d'avilir physiquement et d'enchaîner moralement les noirs par l'alcool et l'échange, quand il a transformé les hommes en voleurs et les femmes en dévergondées, alors le missionnaire entre en scène pour sauver les âmes, les corps n'en valant pas la peine. Caliban, serviteur de Prospero, valait jusque-là quelque chose à ses propres yeux et à ceux de son maître ; à présent, Caliban, esclave de l'ivrognerie et de Trinculo, est devenu un instrument approprié aux pires instincts de ses civilisateurs, créatures elles-mêmes impropres à tout amendement.

Prospero détourne les projets de ceux qui voulaient le tuer et les chasse loin de l'île. C'est grand dommage qu'il n'y ait pas plus de gens qui, comme lui, pourraient purger d'autres îles ou continents, blancs ou noirs, des envahisseurs dont les intentions sont aussi honteuses et meurtrières que celles de Herr Trinculo et M. Stephano. Une fois les conspirateurs supprimés, Prospero est à même d'amener une réconciliation avec Alonzo et de marier son fils avec sa fille. Il abandonne l'art de la magie, casse sa baguette, déchire ses livres, puis retourne à Milan pour y reprendre les responsabilités, s'acquitter de ses devoirs de duc et appliquer son savoir et son expérience au bonheur de ses sujets.

Ariel, son serviteur reconnaissant, a gagné sa liberté et l'obtient de Prospero.

Ainsi se termine la fable.

Le drame est tout empreint d'imagination du commencement à la fin. Il contient une partie des plus remarquables inspirations de Shakespeare, beaucoup de ses plus belles peintures de caractère, et beaucoup aussi de ses vers magiques. Rien ne peut surpasser sa phrase heureuse, sa profondeur et sa subtilité de pensée. Il s'y trouve des passages d'une splendeur lugubre et paisible, des lignes qui coordonnent de longues suites de pensées et de sentiments et les expriment avec une exactitude logique, une verve et une intensité que Shakespeare seul peut reproduire. Sa musique nous hante. Sa profondeur nous étreint. Il n'y a que Shakespeare pour tant savoir, tant sentir, tant exprimer. Comme toutes ses productions, c'est à la fois fécond et suggestif, plein « de pensées qui chevauchent à travers l'éternité ». Il s'y trouve « des pensées qui respirent et des mots qui brûlent ». Le drame s'empare de l'observateur attentif et le captive par une série d'émotions nouvelles et étranges, dans des tressaillements qui ne peuvent cesser « tant que l'esprit se tient dans cette sphère éper-

due ». Dans le drame de Shakespeare, les pensées et les mots trouvent leur perfection. Cela est merveilleux. Comment est-il parvenu à de telles pensées, comment a-t-il pu connaître de tels mots ? Dans son œuvre, la « musique se marie au vers immortel ». Jamais les fils des hommes n'entendront de nouveau une semblable musique, ni de tels vers.

Certains parmi vous trouveront peut-être que tout cela n'est qu'une extravagante rapsodie, mais ceux qui s'efforcent de connaître Shakespeare ne jugeront pas de même. Ils seront à même d'apprécier dignement la fervente et profonde admiration à laquelle son étude donne lieu.

Dans le type de Prospero, Shakespeare paraît vouloir insister sur cette antique vérité, que l'homme est né pour l'action, non pour la simple spéculation. Si Prospero avait songé davantage à son duché et aux responsabilités qu'il lui imposait, s'il avait considéré le privilège de gouverner ses semblables comme l'un des plus nobles qui puissent être conférés à un homme d'esprit large et de cœur généreux (et il avait ces deux choses), il aurait fait moins de cas de la science acquise par les livres ; il aurait compris combien peu et combien beaucoup — à la fois — de résultats il pouvait ainsi acquérir : il n'aurait point laissé son ambitieux frère Alonzo gouverner à sa place, ce que ce dernier semble avoir d'ailleurs fait passablement, étant donné son méchant caractère. Il commença par se dire que c'était beau de contrôler les esprits de l'air et les forces occultes de la nature, ne songeant point que c'était une tâche plus noble et plus difficile de se commander à soi-même et de conquérir l'obéissance de son peuple par des qualités qui gagnent le respect, la vénération et l'amour. Il commença à régir le monde invisible, sans souci de ce monde visible qui réclamait son intelligente intervention. S'il avait correctement pressenti son devoir, il se serait mis à diriger son propre duché. Il mentait à sa naissance, et son frère était également traître envers lui. Une fois banni, il apprit beaucoup. Il découvrit que son frère n'était pas entièrement fautif. Voici un naufragé sur une île déserte avec un tout petit enfant à élever : il montre alors bientôt qu'il sait commander et être obéi. Avant son naufrage, il avait été, comme il le dit lui-même, un « maître d'école » ; à présent, il déploie des qualités plus hautes, celles de l'autorité et de la supériorité. Caliban trouva ce que les propres sujets du duc à Milan n'avaient point vu en lui, des aptitudes à gouverner. Miranda découvrit aussi en lui tout à la fois, un père, un professeur, un gardien et une providence. Comme père, il ap-

prit sans doute beaucoup directement par sa fille qui constituait à elle toute seule un procédé d'instruction bien supérieur à celui des livres. Comme maître de Caliban il s'instruisit encore bien plus. Cette créature, demi-brute et demi-homme, constituait un problème vivant de l'art de gouverner, qu'il avait à résoudre. Vous voyez qu'il ne pouvait pas sortir du gouvernement, malgré tous ses désirs. Caliban, mis en présence de Prospero, peut être considéré comme l'homme primitif mis en contact avec les meilleures natures et les intellects les mieux doués de nos temps. Caliban avait les défauts inhérents à l'homme primitif : le dégoût du travail et de l'effort persistant, l'impatience de l'ordre, de la règle et de la contrainte. Placé sous les ordres de Prospero, c'était un utile esclave, susceptible de devenir un serviteur intelligent. Son dégoût de Prospero était augmenté par la croyance qu'il avait usurpé l'autorité qui, par hérédité, devait lui appartenir. En dépit de ses défauts, Caliban n'était pas d'une nature vicieuse, tant que Trinculo et Stephano ne l'eurent pas corrompu par l'ivrognerie. Mais alors la désobéissance fut complète et il tendit à devenir l'esclave d'ivrognes, plutôt qu'adepte de la sobriété. Il en est toujours ainsi. Caliban ne pouvait se rendre compte des avantages que Prospero lui réservait : en faisant de lui un utile serviteur, il l'humanisait ; en dominant sa vile nature, il lui enseignait à se maîtriser. Nous sommes généralement aveugles, quand il s'agit de distinguer nos réels bienfaiteurs et portés à leur préférer ceux qui sont intéressés. Caliban caractérise ce type de nature humaine. Il avait besoin d'une direction sage et énergique et l'obtint. Sa description des douleurs qui lui furent infligées pour sa désobéissance est en grande partie, sinon entièrement, imaginaire — ou subjective, comme nous disons. Autrement, il n'aurait pas maudit son maître, comme il le fait en termes choisis :

« Toutes les infections que le soleil aspire

Des marais, de la fange des bas-fonds, retombent sur Prospero  
Et font une peste de chaque point de son corps ! Ses esprits

[m'entendent]

Et cependant il me faut le maudire ! Mais ils ne me pinceront pas,  
Ne m'épouvanteront point avec des spectacles de fées, ne me pré-

[cipiteront pas dans la boue,]

Ni ne me traîneront, comme un tison, dans la nuit,

Loin de mon chemin, à moins qu'il ne le leur ordonne ;

Pour une vétille, ils fondent sur moi.

Parfois comme des singes, ils font des grimaces,

Se moquent de moi et me mordent ; puis deviennent des hérissons



Qui dégringolent dans mon chemin et sortent  
Leurs piquants au bruit de mes pas ; parfois je suis  
Tout mordu par les vipères aux langues fourchues  
Qui sifflent jusqu'à me rendre fou. Tenez ! maintenant.....

(*Entre Trinculo*)

Voici un esprit. Il va me tourmenter  
Pour apporter du bois tout doucement. Je vais me coucher à terre  
Et peut-être ne fera-t-il pas attention à moi. »

Dans un moment de meilleure humeur Caliban essaye d'être juste envers Prospero :

« Quand tu vins pour la première fois,  
Tu me fis des caresses et m'apprécias beaucoup ;  
Tu me donnas de l'eau avec des baies dedans ; tu te mis  
A m'apprendre le nom de la plus grosse lumière, puis de celles  
Qui brillent moins le jour et la nuit. Je t'aimai alors  
Et te montrai tous les agréments de l'île :  
Les sources fraîches, les petits lacs, les endroits stériles et fertiles.  
Que je sois maudit d'avoir agi ainsi ! »

De telles imprécations sont vaines, naturellement, adressées surtout à celui qui a été son professeur ! Il ignorait que Trinculo et Stephano voulussent le faire servir à leurs vils et égoïstes projets et le tuer ensuite une fois inutile pour eux, après l'avoir avili à leur propre niveau. La punition des trois, qu'inflige Prospero, à l'acte IV, scène 1, est parfaite à tous points de vue. Ariel remplit le rôle des chiens de chasse, les expulse d'un marais et réduit à néant leur conspiration contre la vie du magicien. Les sujets de Prospero diffèrent de ceux de son duché de Milan. Au lieu d'hommes civilisés, il a un Caliban et des matelots ivres qui désirent renverser le peu d'autorité qu'il possède. De plus, il lui faut conquérir l'amour de sa fille par le jeu constant de qualités qui n'ont jamais été exercées auparavant. Il a à agir comme directeur, père, civilisateur, législateur. Ici, la leçon est claire. Personne ne peut, sans en souffrir, éluder le devoir. Ceux que l'Humanité a destinés à gouverner doivent gouverner ; on ne peut échapper à son injonction. D'une façon ou de l'autre, il faut lui obéir. Chez lui, ses capacités naturelles auraient suffi à remplir les nécessités du gouvernement ; sur l'île déserte, il doit employer des moyens secrets pour soutenir ses droits et maintenir l'autorité. Nemesis le punit pour ses faiblesses, comme elle fait et fera toujours. Caliban n'est pas un homme avili, mais un homme en formation, dont les matières premières ne sont pas encore convenablement façonnées : c'est ce que

montre Shakespeare. Avec sa double nature — moitié homme, moitié poisson — il ne nous est pas aussi odieux que Trinculo et Stephano. Ceux-ci ne voient absolument dans l'île que ce qui peut satisfaire leurs appétits sensuels; ils y trouvent ces deux inestimables avantages: la paresse et l'ivrognerie. Ils voient en Caliban un esclave volontaire. Pour les oreilles et les yeux de Caliban, l'île possède d'autres charmes. Il entend des sons qu'eux ne perçoivent point; ou, s'ils les perçoivent, c'est pour en être effrayés. Caliban, depuis longtemps familier avec eux, n'en est pas ému. Il s'exprime parfois d'une manière qui nous surprendrait, si nous ne savions que les natures rudes et vulgaires ont leur moment d'exaltation et qu'elles se transforment alors et s'idéalisent « en un je ne sais quoi de magnifique et d'étrange ». Remarquez combien les fripons civilisés agissent différemment de Caliban! Ce dernier, lui, n'est en rien inquiété par sa conscience.

TRIN. — « Que mes fautes me soient pardonnées !

STE. — Celui qui meurt paye toutes ses dettes. Je défie ma conscience. Miséricorde !

CAL. — Avez-vous peur ?

STE. — Non, monstre, pas moi.

CAL. — N'ayez aucune crainte, l'île est tout pleine de bruits,  
De douces chansons qui vous remplissent de délices et  
[ne blessent point.]

Parfois mille instruments bruyants viennent  
M'assourdir. Parfois j'entends des voix  
Qui, si je viens de me réveiller d'un long sommeil,  
Me font dormir de nouveau. Alors, dans mon rêve,  
Je crois voir les nuages s'entr'ouvrir pour me montrer  
Des richesses prêtes à tomber entre mes bras. Quand je  
Me réveille, je voudrais me remettre à rêver. »

Tel est le Caliban sobre, le Caliban d'avant les missionnaires et les affaires commerciales. Voici le Caliban ivrogne :

Je ne veux plus faire de barrages pour avoir du poisson ;

Ni rapporter

Ce que le fusil a fait tomber,

Ni gratter les assiettes ou nettoyer les plats ;

Ban, Ban, Cali-Caliban

A un nouveau maître, est devenu un homme nouveau.

La liberté, oui-dà ! Hé ! liberté, liberté !

Le pauvre Caliban est déjà corrompu et civilisé ! Il chante la liberté avec l'enthousiasme de l'ivrogne ! L'œuvre de Prospero est

détruite chez lui ; désormais il tombe de mal en pis et devient un associé tout indiqué pour Trinculo et Stephano.

Caliban est dominé par les choses extérieures ; il attribue l'empire de Prospero sur lui aux livres de magie. Partout le vulgaire commet la même erreur. « Emparez-vous d'abord de ses livres, enjoint-il à Trinculo et à Stephano, avec lesquels il conspire contre la vie de Prospero. Cela fait, le reste est facile. Ce sera le « Sésame, ouvre-toi ! » pour toute la suite. L'autorité, la « beauté de sa fille », seront à nous, une fois ces livres brûlés. Les esprits seront à nos ordres. Ariel est parmi eux. » Caliban est convaincu que les esprits haïssent Prospero autant qu'il le fait lui-même. Voici, en entier, l'injonction de Caliban :

« Donc, comme je te l'ai dit, il a l'habitude  
De dormir dans l'après-midi. Alors, tu pourrais le tuer  
Après avoir commencé par saisir ses livres ; ou avec  
Une bûche lui casser le crâne, ou l'éventrer avec un pieu,  
Ou lui couper la gorge avec ton couteau. Mais n'oublie pas  
De t'emparer d'abord de ses livres, car sans eux  
Il n'est qu'un sot, comme je suis, et ne peut commander  
A aucun esprit : tous le détestent  
Aussi profondément que moi. Ne brûle que ses livres.  
Il a de vaillants instruments (c'est ainsi qu'il dit),  
Avec lesquels il ornera sa maison, quand il en aura une.  
Ce qu'il faut surtout viser, c'est  
La beauté de sa fille, il la trouve  
« Sans pareille ». Je n'ai jamais vu de femme,  
Si ce n'est Sycorax, ma mère, et elle,  
Mais elle surpasse Sycorax  
D'une manière inimaginable. »

Sur sa terre désolée, Prospero sent son impuissance, mais il trouve un aide, en Ariel, celui qui avait été emprisonné pendant 12 ans dans le creux d'un arbre. Ariel, pour Prospero et pour nous, peut représenter l'Humanité, tellement cet esprit se montre secourable. Sycorax fit bien d'emprisonner cette force, cet être qui subjugué l'animalité.

Ariel est presque partout à la fois, il annihile le temps et l'espace et place « une ceinture tout autour de la terre en quarante minutes ». Pour Prospero, Ariel se montre serviteur attentionné et reconnaissant, exécutant ses ordres et faisant, en réalité, tout ce que celui-ci est incapable de faire. Ariel est l'Hermès — ou le Mercure — de Prospero. Le « fidèle Ariel » — l'esprit de l'air — s'envole à la moindre injonction de Prospero et le sert sur terre

comme sur mer, lui assujettissant ses ennemis par des illusions et des mensonges qui les entraînent dans des situations et des crises embarrassantes. L'Ariel invisible (car Prospero, seul parmi tous les habitants de l'île, peut le voir) dit avec raison :

« Souviens-toi que je t'ai servi dignement,  
Que je ne t'ai point menti, que je n'ai point fait de fautes,  
Que je t'ai servi sans ressentiments ni plaintes. »

C'est là une suite de prétentions que Prospero admet parfaitement, car il est, comme tout homme probe, reconnaissant aux êtres qui, représentants de l'Humanité, lui apportent une aide, visible ou invisible.

En réalité, Prospero ne se séparera pas d'Ariel avant d'avoir quitté l'île et regagné son duché : Ariel aura alors sa liberté. Prospero ressent profondément son isolement du monde extérieur, maintenant que des messagers en sont venus, et Ariel réclame sa liberté. Depuis longtemps Prospero a apprécié Caliban à sa juste valeur et ses traîtres projets actuels sont connus. La gratitude de Caliban, jamais profonde ni naturelle, s'évanouit complètement à présent. La reconnaissance n'est pas la caractéristique des Calibans de notre société ; avouer des obligations et s'en souvenir est le fait des natures réellement bonnes. La reconnaissance chez des natures demi-humaines et demi-brutes, avec quelque chose du poisson dans leur composition, est totalement anormale. Prospero ne peut quitter son île sans de profonds regrets : il y a tant acquis de cette sagesse qui vient dans la solitude, et non sans chagrin, chez les esprits réfléchis !

« Plus profondément que n'a jamais été le plomb de sonde », il  
[noie son livre de magie..]

#### PROSPERO

Vous, génies des montagnes, des ruisseaux, lacs dormants et  
[bosquets]

Et vous qui, sur le sable, d'un pied sans empreinte,  
Chassez Neptune qui se retire et le fuyez  
Quand il revient ; vous, petites poupées  
Qui faites des ronds à la lumière de la lune  
Partout où la marée s'avance ; et vous, dont le passe-temps  
Est de faire des champignons de minuit ; qui  
Vous réjouissez d'entendre le solennel couvre-feu ; à l'aide  
Desquels (quoique vous soyez de faibles maîtres) j'ai obscurci  
Le soleil de midi, produit les vents en furie,  
Et soulevé la guerre entre la verte mer  
Et la voûte azurée : au redoutable tonnerre qui gronde,

J'ai donné le feu et fendu le solide chêne de Jupiter  
 Avec ses propres traits; j'ai fait trembler le promontoire  
 A la solide base et arraché par les racines  
 Le pin et le cèdre; à mon commandement, les tombes  
 Ont réveillé leurs morts, se sont ouvertes et mon art  
 Tout-puissant les a menés au grand jour. Mais j'abjure  
 Maintenant cette terrible magie; et, quand je rechercherai  
 Une musique céleste (ce que je fais à présent),  
 Pour atteindre le but que je me propose,  
 Je briserai ma baguette et l'ensevelirai  
 A bien des pieds sous terre; puis,  
 Plus profondément que n'alla jamais le plomb de soude,  
 Je noierai mon livre.

*Musique solennelle.*

Pour la dernière fois, Prospero exerce sa trop puissante habileté sur un cercle ravi qui comprend le roi, Antonio, Gonzalo, et d'autres, auxquels il s'adresse à plusieurs reprises en un langage remarquable de douceur et de raison. Puis il retourne à l'activité de ce monde qu'il n'aurait jamais dû quitter et à l'accomplissement journalier de devoirs qu'il n'aurait jamais dû abandonner à un autre, « négligeant ainsi les destinées de ce monde », auxquelles il n'était pas le seul à être voué. Il se débarrasse de volumes qu'il appréciait autrefois plus que son duché et va se consacrer désormais au gouvernement de ces hommes dont la connaissance des cœurs, d'où provient toute sagesse pratique ou théorique, lui servira pour être appliquée au mieux de leurs intérêts. Jusqu'ici Prospero n'est point remarqué de ceux qui le connurent autrefois, tellement il est changé par le temps et la mûre expérience. Ils le reconnaîtront bientôt, non seulement en ce qu'il fut, mais aussi en ce qu'il est devenu. L'étudiant rêveur, appliqué aux sciences occultes, est devenu l'homme pratique, le maître sagace, celui qui s'est clairement rendu compte de la portée de la science, de sa valeur en face des problèmes actuels que présente la destinée humaine.

PROSPERO (*On entend une musique grave*).

Un air solennel, le meilleur consolateur  
 D'une imagination incertaine, guérit ton cerveau  
 Maintenant inutile, bouilli dans ton crâne!  
 Ceux-ci se tiennent debout, contenus par le charme. —  
 Pieux Gonzalo, homme honorable,  
 Mes yeux, sympathiques à l'éclair des tiens,  
 Laissent tomber de fraternelles larmes. Le charme s'évanouit  
 Rapidement et, comme l'aurore qui surprend la nuit,

Faisant fondre les ténèbres, leurs sentiments naissants  
 Commencent à chasser les ignorantes vapeurs qui enveloppent  
 Leur raison plus claire — ô mon bon Gonzalo,  
 Mon véritable gardien, loyal gentilhomme,  
 Tu iras jusqu'à lui : je te paierai tes faveurs  
 Une fois rentré, aussi bien en paroles qu'en actions. —  
 Très cruellement tu t'es joué de moi, Alonzo, et de ma fille;  
 Ton frère était ton aide dans la circonstance;  
 Tu es irrité pour cela maintenant, Sébastien. —  
 Sang et chair, vous, mon frère, qui excitiez l'ambition,  
 Chassiez le remords et la nature; qui, avec Sébastien,  
 (Dont les douleurs intérieures en sont plus intenses)  
 Auriez voulu tuer ici votre roi, je vous pardonne,  
 Aussi dénaturé que vous soyiez! — Leur intelligence  
 Commence à grandir; et la marée qui monte  
 Comblera bientôt les rivages raisonnables  
 Actuellement impurs et fangeux. Aucun d'entre eux  
 Ne me regarde encore, ni ne me reconnaît. Ariel,  
 Apporte-moi le chapeau et la rapière dans ma cellule;

(*Ariel sort.*)

Je vais enlever mon déguisement et me présenter moi-même  
 Comme j'étais autrefois à Milan : — Fais vite, esprit,  
 Tu seras libre sous peu (1).

Gonzalo — le bon Gonzalo — le seul ami qui soit resté fidèle  
 à Prospero — est enthousiasmé des attractions que l'île présente  
 à son imagination et se laisse aller à l'utopie de s'en croire maître.  
 Ses amis Antonio et Sébastien, qui n'avaient jamais pensé que  
 Gonzalo pût faire un rêve de jour, se moquent de lui à ce sujet.  
 L'homme pratique est rarement supposé posséder dans sa nature  
 un côté imaginatif, et quand celui-ci se révèle, les amis ne remer-  
 cient guère. Gonzalo connaît le monde, mais son utopie nous  
 montre quel mince profit il sait tirer de son savoir. Prospero  
 aurait pu entrevoir une semblable utopie avant d'être banni,  
 mais non depuis. Il a découvert ce que « gouverner les hommes »  
 veut dire et n'a aucune illusion sur ce chapitre. Prospero, l'étu-  
 diant de la magie, est devenu l'étudiant des hommes et se  
 rend compte des difficultés de leur gouvernement. L'utopie de  
 Gonzalo n'est que le tableau précurseur de beaucoup de modernes

(1) Malgré nos efforts, il nous a été impossible de rendre ce passage  
 plus clair en français qu'en anglais. Shakespeare est parfois un peu  
 obscur, il faut bien l'avouer. (*Note du Traducteur*).

utopies et doit trouver sa place ici. Shakespeare avait son idée en la plaçant dans « La Tempête ». Le réel et l'idéal s'y entremêlent dans de louables intentions.

GON. — Si j'avais l'établissement dans cette île, mon maître —

ANT. — Il l'ensemencerait avec de la graine d'ortie —

SEB. — Ou de la patience, ou de la mauve —

GON. — Et si j'en étais le roi, que ferais-je ?

SEB. — On ne pourrait se griser — par manque de vin.

GON. — Je voudrais la république, je voudrais par les contraires  
Accomplir toute chose ; n'admettrais aucune espèce  
De commerce ; aucun nom de magistrat ;  
Les lettres seraient inconnues ; inutiles le respect,  
La richesse ou la pauvreté ; plus de contrats,  
De successions, limites de terres, cultures ou vignes ;  
Finis, le métal, le blé, vin, ou huile !  
Plus de travaux ; tous les hommes fainéants, tous !  
Les femmes aussi ; rien qu'innocents et purs :  
Aucune souveraineté. —

SEB. — Et cependant il voudrait régner sur tout cela.

ANT. — La dernière partie de sa république  
Oublie le commencement.

GON. — La nature produirait toutes choses en commun  
Sans suer et sans efforts ; la trahison, le crime,  
L'épée, la pique, le couteau, le fusil, les engins :  
Plus besoin de tout cela ! La nature produirait  
A elle seule toutes les choses en abondance  
Pour nourrir mon peuple d'innocents.

Pour plaire à sa fille une fois de plus en montrant son habileté magique et pour ravir Ferdinand, son futur mari, il évoque une mascarade, laquelle est suivie d'une scène pastorale de gaité et d'innocence.

Soudain le souvenir de la tentative préméditée sur sa vie et l'honneur de sa fille par Caliban, Trinculo et Stephano, produit sur son visage une altération que Ferdinand perçoit rapidement, au moment où les ébats prennent fin. Alors Prospero le gronde en des vers qui sont parmi les plus sages, les plus vrais et les plus mélancoliques de ce drame étonnant ; vers qui, bien que répétés, sont pleins d'une toute-puissante portée et d'une merveilleuse et incessante musique. La conclusion résume la philosophie des origines et des destinées humaines. A cette philosophie on ne saurait rien ajouter, ni rien retrancher, tellement elle est parfaite :

Vous regardez en tremblant, mon fils,  
Comme si vous étiez épouvanté : Soyez gai, monsieur,  
Nos divertissements sont maintenant terminés.  
Nos acteurs, comme je vous l'ai dit, sont tous des esprits  
Fondus dans la claire atmosphère ;  
Et, semblables à la chimérique charpente de cette vision,  
Les tours couronnées de nuages, les palais luxueux,  
Les temples sévères, le grand globe lui-même,  
En vérité, tous s'évanouiront ;  
Et, comme cet immatériel appareil qui disparaît,  
Ne laisseront pas même les traces d'une ruine.  
Nous sommes cette matière sur laquelle  
On bâtit des chimères, et notre frêle existence  
Est entourée de ténèbres.  
Oui !  
Nous sommes cette matière dont  
On fait des rêves, et notre frêle existence  
Est environnée de sommeil.

(Traduit du « **The National Reformer** » par André RICHER).

---



# BULLETIN DE FRANCE

---

## I. — RAPPORT

TENDANT A RECHERCHER

### LES MOYENS DE PARER AUX FUNESTES CONSÉQUENCES

#### **Du Système actuel des adjudications.**

Depuis quelques années déjà, le Comité central de la Fédération des Travailleurs du Livre avait formé le projet de provoquer un mouvement d'opinion sur cette question des adjudications, afin d'arriver à en modifier le système, source de tant de convoitises, de tromperies et de déceptions. Mais ce qui nous en a toujours détourné, ce sont les préoccupations sans cesse renaissantes que nous imposent les difficultés de la situation générale, les fréquents conflits sur le point de surgir et que nous nous efforçons d'éviter.

En 1889, lorsque M. Bourgeois était sous-secrétaire d'Etat au ministère de l'intérieur, nous avons commencé des démarches afin de connaître les dispositions du gouvernement en matière d'adjudication et savoir s'il était prêt à donner satisfaction aux réclamations des travailleurs en modifiant les clauses du cahier des charges.

Les réponses données à nos demandes répétées, la grandeur de l'effort à faire, l'importance du mouvement d'opinion à produire ne nous découragèrent pas mais nous obligèrent à étudier plus attentivement la question, à centraliser les renseignements y relatifs, et enfin à nous assurer patiemment l'appoint des événements que le temps ne manquerait pas de nous rendre favorables, grâce à l'action simultanée des groupements ouvriers, des conseils municipaux, des représentants au Parlement.

Ici se place une question sur l'opportunité de notre intervention :

certains esprits dédaignent l'action des syndicats ou des groupements ouvriers dans ces revendications partielles, considérées comme des palliatifs, sinon impuissants à améliorer la situation des travailleurs, tout au moins insuffisants. Ils n'ont de foi que dans les remèdes radicaux ou dans les solutions générales qui tendent à transformer l'ensemble du système social.

Pour notre compte, principalement sur des choses de pareille importance dont l'influence se fait sentir chaque jour dans les relations entre patrons et ouvriers, nous croyons à l'entière efficacité de notre intervention, et nous sommes certain qu'avec une persévérante volonté nous finirons par triompher des nombreux obstacles que nous avons jusqu'ici rencontrés sur notre route.

Aujourd'hui, entourés de tous les documents que nous avons pu recueillir, de tous les faits qui sont arrivés à notre connaissance, nous venons vous entretenir de cette grosse question du système actuel des adjudications et des modifications à introduire dans les cahiers des charges des marchés de fournitures conclus avec l'Etat, avec les départements et avec les communes.

#### HISTORIQUE DU SYSTÈME DES ADJUDICATIONS

Le système des adjudications ou marchés de fournitures a eu constamment pour base l'exécution des travaux, transports ou fournitures à des prix aussi peu élevés que possible, au moyen de rabais offerts par les adjudicataires, en vue de sauvegarder les intérêts des contribuables.

Jusqu'à l'ordonnance royale du 4 décembre 1836, dont nous parlerons plus loin, il n'existait point, en matière de marchés de fournitures, de règlement particulier offrant un ensemble complet.

Dans la législation, on ne trouvait que fort peu de règles générales applicables à toutes les fournitures de quelque espèce que ce fût, et à quelque branche d'administration qu'elles fussent affectées.

Plusieurs actes, décrets, arrêtés ont été rendus de 1789 à 1830; ils concernaient principalement les fournitures des armées et réglaient les conditions dans lesquelles ces fournitures devaient être livrées aux départements de la guerre et de la marine.

Le 31 janvier 1833, une loi de finances était adoptée et décidait qu'une ordonnance royale réglerait les formalités à suivre à l'avenir dans tous les marchés passés au nom du gouvernement.

Ce n'est qu'en 1836 que parut cette ordonnance du roi, datée des 4-7 décembre. A partir de ce moment-là, les marchés passés au nom de l'Etat furent l'objet d'un règlement, aussi bien que les

travaux des départements et des communes furent l'objet d'une deuxième ordonnance, promulguée à la date des 14 novembre-12 décembre 1837.

Ces deux ordonnances, longtemps introuvables pour nous, eurent une telle influence sur les marchés conclus entre l'Etat, les départements, les communes et leurs fournisseurs, si fréquemment les diverses administrations se retranchèrent derrière les dispositions et les prescriptions de ces ordonnances et s'opposèrent aux réclamations légitimes des ouvriers et même des patrons, qu'il n'est pas inutile de les reproduire ici ; cela permettra aux intéressés de mieux les étudier et de rechercher avec nous les moyens d'en faire disparaître les funestes effets.

*Ordonnance du 4 décembre 1836.*

Louis-Philippe, etc.,

Vu la loi du 31 janvier 1833, portant article 12 (ci-dessus) :

Vu les avis et propositions de nos ministres de la guerre, de la marine, des affaires étrangères, de l'intérieur, des travaux publics, de l'agriculture et du commerce, de la justice et des cultes et de l'instruction publique ; sur le rapport de notre ministre secrétaire d'Etat au département des finances ;

Notre Conseil d'Etat entendu, etc.

Art. 1<sup>er</sup>. — Tous les marchés au nom de l'Etat seront faits avec *concurrence et publicité*, sauf les exceptions mentionnées en l'article suivant :

Art. 2. — Il pourra être traité de gré à gré :

1<sup>o</sup> Pour les fournitures, transports et travaux dont la dépense totale n'excèdera pas 10,000 francs, ou, s'il s'agissait d'un marché passé pour plusieurs années, dont la dépense annuelle n'excèdera pas 3,000 francs ;

2<sup>o</sup> Pour toute espèce de fournitures, de transports et de travaux, lorsque les circonstances exigeront que les opérations du gouvernement soient tenues secrètes ; ces marchés devront être préalablement autorisés par nous sur un rapport spécial ;

3<sup>o</sup> Pour les objets dont la fabrication est exclusivement attribuée à des porteurs de brevets d'invention ou d'importation ;

4<sup>o</sup> Pour les objets qui n'auraient qu'un possesseur unique ;

5<sup>o</sup> Pour les ouvrages et objets d'art et de précision dont l'exécution ne peut être confiée qu'à des artistes éprouvés ;

6<sup>o</sup> Pour les exploitations, fabrications et fournitures qui ne seraient faites qu'à titre d'essai ;

7<sup>o</sup> Pour les matières et denrées qui, à raison de leur nature particulière et de la spécialité de l'emploi auquel elles sont destinées, doivent être achetées et choisies aux lieux de production, ou livrées, sans intermédiaire, par les producteurs eux-mêmes ;

8<sup>o</sup> Pour les fournitures, transports ou travaux qui n'auraient été l'objet d'aucune offre aux adjudications, ou à l'égard desquels il n'aurait été proposé que des prix inacceptables : toutefois, lorsque l'administration aura cru devoir arrêter et reconnaître un maximum

de prix, elle ne devra pas dépasser ce maximum ;

9° Pour les fournitures, transports et travaux qui, dans les cas d'urgence évidents, amenés par des circonstances imprévues, ne pourront pas subir les délais des adjudications ;

10° Pour les affrètements passés au cours des places, par l'intermédiaire des courtiers, et pour les assurances sur les chargements qui s'ensuivent ;

11° Pour les achats de tabac ou de salpêtre indigène, dont le mode est réglé par une législation spéciale ;

12° Pour le transport des fonds du Trésor.

Art. 3. — Les adjudications publiques relatives à des fournitures, à des travaux, à des exploitations ou fabrications, qui ne pourraient être sans inconvénient livrées à une concurrence illimitée, pourront être soumises à des restrictions qui n'admettent à concourir que des personnes reconnues capables par l'administration et produisant les titres justificatifs exigés par les cahiers des charges.

Art. 4. — Le mode d'approvisionnement des tabacs exotiques employés par l'administration sera déterminé par un règlement spécial.

Art. 5. — *Les cahiers des charges détermineront la nature et l'importance des garanties que les fournisseurs ou entrepreneurs auront à produire, soit pour être admis aux adjudications, soit pour répondre de l'exécution de leurs engagements ; ils détermineront aussi l'action que l'administration exercera sur ces garanties en cas d'inexécution de ces engagements.*

Art. 6. — L'avis des adjudications à passer sera publié, sauf les cas d'urgence, un mois à l'avance, par la voie des affiches et par tous les moyens ordinaires de publicité.

Cet avis fera connaître :

1° Le lieu où l'on pourra prendre connaissance du cahier des charges ;

2° Les autorités chargées de procéder à l'adjudication ;

3° Le lieu, le jour et l'heure fixés pour l'adjudication.

Art. 7. — Les soumissions devront toujours être remises cachetées en séance publique. Lorsqu'un *maximum* de prix ou un *minimum* de rabais aura été arrêté d'avance par le ministre ou par le fonctionnaire qu'il aura délégué, ce *maximum* ou ce *minimum* devra être déposé cacheté sur le bureau, à l'ouverture de la séance.

Art. 8. — Dans le cas où plusieurs soumissionnaires auraient offert le même prix, et où ce prix serait le plus bas de ceux portés dans les soumissions, il sera procédé, séance tenante, à une réadjudication, soit sur de nouvelles soumissions, soit à extinction des feux, entre ces soumissionnaires seulement.

Art. 9. — Les résultats de chaque adjudication seront constatés par un procès-verbal relatant toutes les circonstances de l'opération.

Art. 10. — Il pourra être fixé par le cahier des charges un délai pour recevoir des offres de rabais sur le prix de l'adjudication. Si, pendant ce délai, qui ne devra pas dépasser trente jours, il s'est fait une ou plusieurs offres de rabais d'au moins dix pour cent chacune, il sera procédé à une réadjudication entre le premier adjudicataire et l'auteur ou les auteurs des offres de rabais, pourvu

que ces derniers aient préalablement à leurs offres, satisfait aux conditions imposées par le cahier des charges pour pouvoir se présenter aux adjudications.

Art. 11. — Les adjudications et réadjudications seront toujours subordonnées à l'approbation du ministre compétent, et ne seront valables et définitives qu'après cette approbation, sauf les exceptions spécialement autorisées et rapportées dans le cahier des charges.

Art. 12. — Les marchés de gré à gré seront passés par nos ministres ou par les fonctionnaires qu'ils auront délégués à cet effet ; ils auront lieu :

1° Soit sur un engagement souscrit à la suite d'un cahier des charges ;

2° Soit sur soumission souscrite par celui qui propose de traiter ;

3° Soit sur correspondance, suivant les usages du commerce.

Il pourra y être suppléé par des achats faits sur simple facture, pour des objets qui devront être livrés immédiatement et dont la valeur n'excèdera pas 500 fr.

Les marchés de gré à gré passés par les délégués d'un ministre et les achats qu'ils auront faits seront subordonnés à son approbation, à moins, soit de nécessité résultant de force majeure, soit d'une autorisation spéciale ou dérivant des règlements ; circonstances qui devront être relatées dans lesdits marchés ou dans les décisions approbatives des achats.

Art. 13. — Les dispositions de la présente ordonnance ne sont point applicables aux marchés aux colonies ou hors du territoire français, ni aux travaux que l'administration se trouve dans la nécessité d'exécuter en régie ou à la journée.

Art. 14. — Les décrets ou ordonnances relatifs aux marchés pour les diverses branches de services publics continueront à recevoir leur exécution en tout ce qui n'est pas contraire à la présente ordonnance.

Art. 15. — Nos ministres secrétaires d'Etat sont chargés, etc.

---

Les règles tracées par cette ordonnance ont été appliquées aux communes et établissements publics par l'ordonnance du 14 novembre 1837, que voici :

*Ordonnance du 14 novembre 1837.*

Louis-Philippe, etc.

Sur le rapport de notre ministre secrétaire d'Etat au département de l'intérieur ;

Vu le décret du 10 brumaire an IV, concernant les travaux qui s'exécutent au compte des hospices et des établissements de charité ;

Vu le décret du 17 juillet 1808, qui a étendu aux communes les dispositions qui précèdent ;

Vu l'ordonnance royale du 4 décembre 1836, portant règlement sur les formes à suivre dans les marchés passés au compte de l'Etat ;

Vu la loi du 17 juillet 1837 ;

Notre Conseil d'Etat entendu, etc.

Art. 1<sup>er</sup>. — Toutes les entreprises pour travaux et fournitures au nom des communes et des établissements de bienfaisance seront données *avec concurrence et publicité*, sauf les exceptions ci-après.

Art. 2. — Il pourra être traité de gré à gré, sauf approbation par le préfet, pour les travaux et fournitures dont la valeur n'excèdera pas 3,000 fr. Il pourra également être traité de gré à gré, à quelque somme que s'élèvent les travaux et fournitures, mais avec l'approbation du ministre de l'intérieur :

1° Pour les objets dont la fabrication est exclusivement attribuée à des porteurs de brevets d'invention ou d'importation ;

2° Pour les objets qui n'auraient qu'un possesseur unique ;

3° Pour les ouvrages et les objets d'art et de précision, dont l'exécution ne peut être confiée qu'à des artistes éprouvés ;

4° Pour les exportations, fabrications et fournitures qui ne seraient faites qu'à titre d'essais ;

5° Pour les matières et denrées qui, à raison de leur nature particulière et de la spécialité de l'emploi auquel elles sont destinées, doivent être achetées et choisies aux lieux de production, ou livrées, sans intermédiaire, par les producteurs eux-mêmes ;

6° Pour les fournitures et travaux qui n'auraient été l'objet d'aucune offre aux adjudications, et à l'égard desquels il n'aurait été proposé que des prix inacceptables : toutefois, l'administration ne devra pas dépasser le maximum arrêté conformément à l'article 7 ;

7° Pour les fournitures et travaux qui, dans les cas d'urgence absolue dûment constatés, amenés par des circonstances imprévues, ne pourraient pas subir les délais des adjudications.

Art. 3. — Les adjudications publiques relatives à des fournitures, à des travaux, à des exploitations ou fabrications qui ne pourraient être sans inconvénient livrées à une concurrence illimitée, pourront être soumises à des restrictions qui n'admettront à concourir que des personnes préalablement reconnues capables par l'administration et produisant des titres justificatifs exigés par les cahier des charges.

Art. 4. — *Les cahiers des charges détermineront la nature et l'importance des garanties que les fournisseurs ou entrepreneurs auront à produire, soit pour être admis aux adjudications, soit pour répondre de l'exécution de leurs engagements ; ils détermineront aussi l'action que l'administration exercera sur ces garanties, en cas d'inexécution de ces engagements. Il sera toujours et nécessairement stipulé que tous les ouvrages exécutés par les entrepreneurs, en dehors des autorisations régulières, demeureront à la charge de ces derniers, sans répétition contre les communes ou les établissements.*

Art. 5. — Les cautionnements à fournir par les adjudicataires seront réalisés à la diligence des receveurs des communes et des établissements de bienfaisance

Art. 6. — L'avis des adjudications à passer sera publié, sauf les cas d'urgence, un mois à l'avance, par la voie des affiches et par tous les moyens ordinaires de publicité. Cet avis fera connaître :

1° Le lieu où l'on pourra prendre connaissance du cahier des charges ;

2° Les autorités chargées de procéder à l'adjudication ;

3° Le lieu, le jour et l'heure fixés pour l'adjudication.

Art. 7. — Les soumissions devront toujours être remises cachetées en séance publique. Un *maximum* de prix ou *minimum* de rabais, arrêté d'avance par l'autorité qui procède à l'adjudication, devra être déposé cacheté sur le bureau, à l'ouverture de la séance.

Art. 8. — Dans le cas où plusieurs soumissionnaires auraient offert le même prix, il sera procédé, séance tenante, à une adjudication entre ces soumissionnaires seulement, soit sur de nouvelles soumissions, soit à extinction des feux.

Art. 9. — Les résultats de chaque adjudication seront constatés par un procès-verbal relatant toutes les circonstances de l'opération.

Art. 10. — Les adjudications seront toujours subordonnées à l'approbation du préfet et ne seront valables et définitives, à l'égard des communes et des établissements, qu'après cette approbation.

Art. 11. — Notre ministre de l'intérieur est chargé, etc., etc.

A partir de ce moment, l'Etat, les départements et les communes devaient mettre tous les travaux, transports et fournitures à l'adjudication, au moyen de la *concurrence* et de la *publicité*, lorsque ces travaux dépassaient les sommes prévues par les ordonnances. Seuls échappaient à ces conditions les travaux désignés à l'article 2.

La lecture attentive de ces deux ordonnances indique l'intention de l'Etat de sauvegarder les deniers des contribuables, de prévenir les dilapidations, et, par la mise en adjudication, au moyen des rabais, d'obtenir les fournitures au meilleur marché possible.

#### CONSÉQUENCES DU SYSTÈME DES ADJUDICATIONS

Il nous appartient maintenant d'indiquer les conséquences, pour l'Etat, les départements et les communes, aussi bien que pour les patrons et pour les ouvriers, du système des adjudications. Dans cet examen, nous nous tiendrons rigoureusement sur le terrain des faits, le seul qui puisse attirer l'attention de ceux que nous avons à convaincre pour les décider à nous donner satisfaction.

Dans un contrat, dans un marché quelconque, il y a le client et le fournisseur, et comme dans toute opération commerciale ou industrielle, l'un et l'autre ont pour but : le premier, de faire exécuter un travail à un prix avantageux et de bonne qualité ; le deuxième, à prélever un certain bénéfice sur les fournitures à livrer, malgré des rabais obligés de par la loi, puisque la concurrence et la publicité sont imposées précisément pour provoquer les rabais offerts par les nombreux concurrents qui con-

voient l'exécution des travaux de l'Etat, des départements, des communes ou des particuliers.

Personne ne songera à reprocher aux représentants des intérêts des contribuables de sauvegarder les deniers publics, — et le système des adjudications est un des procédés de sauvegarde employés, — mais nous nous élevons précisément contre l'efficacité de ce procédé, contre ce système tel qu'il est appliqué actuellement, nous prétendons même qu'il va contre le but que l'on voudrait atteindre.

Les travaux, au moins dans notre profession, sont estimés déjà à leur valeur propre avant l'adjudication ; l'adjudication terminée, tous ces travaux sont l'objet de rabais très souvent fort élevés, et les fournitures d'imprimerie sont adjudgées avec des rabais énormes variant de 15 et 20 p. 100 à 50 et 60 p. 100 ; il y en a eu de plus forts encore à Paris et dans d'autres villes de France.

Ce fait est la conséquence fatale du nombre considérable d'imprimeurs appelés à concourir, en vertu des ordonnances de 1836 et 1837, car elles interdisent l'éviction de tout patron, quelles que soient les conditions dans lesquelles il fait travailler, peu important les moyens plus ou moins avouables qu'il emploie pour fabriquer ses fournitures.

Ce qui est vrai pour l'imprimerie doit l'être également pour les autres professions, où les rabais offerts sont aussi élevés, sinon davantage.

Or, puisqu'il existe, dans toutes les administrations, des experts, chargés de faire les devis de tous les travaux, de toutes les fournitures que ces administrations confient à l'industrie privée, devis établis au moins sur la moyenne des tarifs ordinaires, il devrait rester peu de marge pour laisser de grands profits aux fournisseurs.

Aux bénéfices limités que peuvent espérer les fournisseurs, il faut ajouter une cause redoutable de diminution de ces bénéfices, ce sont les rabais consentis, qui, d'une affaire d'apparence avantageuse, en font une affaire préjudiciable, ou dans laquelle le patron ne fait qu'échanger ses produits, sans aucune rétribution personnelle, sans profit possible.

Dans l'état actuel de l'industrie, avec ses inquiétants aléas qui interdisent d'escompter une bonne affaire capable de dédommagement, exposant un patron à une meurtrière concurrence, conçoit-on comme une chose raisonnable et normale que ce patron se décide à travailler à perte, pour le seul plaisir d'être four-



nisseur d'une administration quelconque ? Ce n'est pas à notre fin de siècle que nous trouverons ce patron qui travaille à perte, pour la gloire. Nous arrivons ici à une partie des plus délicates de la question ; mais il nous faut nous prononcer sans détour, sans périphrase, sur les abus et sur les malversations nées du système actuel des adjudications, qui a accumulé tant de plaintes contre lui.

Nous n'admettons pas qu'un patron consente délibérément à travailler à perte, à exposer ses capitaux, ses intérêts, son nom, pour devenir adjudicataire de travaux au moyen de ruineux rabais. Il faut qu'il y ait — et il y en a — des combinaisons qui permettent de couvrir le déficit que ne manquent pas de produire les rabais offerts.

Il nous suffit, pour cela, en matière de grands travaux, d'ouvrir le *Bulletin municipal* de Paris, et nous trouverons, dans les nombreuses discussions du Conseil général de la Seine et du Conseil municipal de Paris, la preuve de l'exécution défectueuse des grands travaux obtenus par voie d'adjudication et avec de grands rabais. Il faut admettre cependant que des économies réelles peuvent être faites sur de grands travaux exécutés à un endroit déterminé ; ce qui explique que des rabais peuvent être consentis dans certaines circonstances sans compromettre les intérêts des traitants.

Dans une séance du mois de juin 1895, un conseiller général de la Seine, le citoyen Renou, aujourd'hui député, soutenait la nécessité d'intervenir pour modifier le système actuel des adjudications ; nous croyons devoir reproduire ici les arguments invoqués et qui confirment la thèse que nous soutenons :

Sans rechercher d'où sont écloses les fortunes scandaleuses des adjudicataires des travaux sous Louis-Philippe et Napoléon III où le gaspillage des deniers publics, la concussion, le népotisme étaient choses communes, nous avons pu voir sous la République des faits identiques : à l'Ecole du Livre, dans les travaux des lycées et collèges, au canal Saint-Denis, etc., tous faits dont le Conseil municipal de Paris a eu à s'occuper. Tout récemment encore, ne découvrait-on pas, dans les comptes du Département de la Seine, la trace des complaisances et des rapines de l'architecte-vérificateur, de M. T... ? Le Département lui-même n'est-il pas en instance pour obtenir une réduction sur les mémoires exagérés de M. G... ?

Nous plaçant à un point de vue plus élevé et plus digne, celui de l'organisation de la société et du rôle que doivent y jouer les pouvoirs constitués, nous devons convenir que, si les particuliers peuvent débattre leurs intérêts dans la limite des conventions qu'ils peuvent souscrire, en tant qu'elles ne portent pas atteinte

aux lois et règlements, il ne peut en être de même pour les communes, les départements et l'Etat.

En principe, nous disons que l'Etat, les départements et les communes ne peuvent ni ne doivent chercher à faire de la spéculation, ne peuvent ni ne doivent concourir à enrichir pas plus qu'à ruiner les particuliers ou les associations, à raison des travaux et fournitures qui peuvent leur être adjugés.

A l'appui des dénonciations des malfaçons constatées dans maintes entreprises, des inobservations stipulées dans les cahiers des charges, *des complaisances du personnel chargé de la vérification et du contrôle*, des travaux supplémentaires que le système des adjudications entretient et qui augmentent souvent dans une proportion exagérée les crédits votés, tous faits dont les communes, les départements et l'Etat doivent se défendre à grands frais; nous devons retenir qu'aucun fournisseur ou entrepreneur n'a eu la naïveté de soumissionner aux adjudications sans être convaincu d'y amasser des bénéfices importants : bénéfices sur la matière première, à laquelle l'entreprise ne touche pas; bénéfices sur la main-d'œuvre; prélèvements illégaux de retenues supposées consenties par les travailleurs pour les cas d'accidents, etc., qui, en bonne justice, sont imputables à l'entreprise; bénéfices sur le capital engagé, etc.

Est-il moral que tous ces prélèvements sur tout ce que l'entreprise occupe ou fournit le soient à son seul profit, alors que les crédits sont soldés par les caisses alimentées par les contribuables ?

M. Navarre, dans la séance du Conseil municipal de Paris, du 25 mars 1895, revenait encore sur les malfaçons récentes dans les travaux de l'Ecole du Livre, du canal de Saint-Denis, etc., etc.

Il s'agit ici de grands travaux; que dirons-nous pour les fournitures de moindre importance ?

Tout en insistant sur les faits relevés par le conseiller général de la Seine, nous n'irons pas jusqu'à affirmer que les entrepreneurs ou les fournisseurs prélèvent de gros bénéfices sur les travaux obtenus par adjudication, mais nous comprenons que les adjudicataires ne reculent devant aucun moyen sinon pour faire de grands profits, mais au moins pour éviter des pertes. C'est ainsi que, pour l'industrie du Livre et comme conséquence des forts rabais consentis, les combinaisons dont nous parlions plus haut se font avec certaines complicités intéressées, sur la qualité, sur la quantité des fournitures, sur la main-d'œuvre, exécutée par des femmes et des enfants, au grand préjudice des ouvriers dont les salaires sont avilis, et des patrons scrupuleux qui se voient écartés des adjudications : obligés de faire des rabais moindres pour payer des salaires raisonnables et plus consciencieux dans le respect des conditions fixées par le cahier

des charges, ils ne peuvent pas supporter la concurrence faite par des patrons sarrasins.

Les malfaçons, les travaux défectueux s'expliquent aisément : recherchant une main-d'œuvre à bon marché, les adjudicataires appliquent dans leurs chantiers ou dans leurs ateliers le système du travail à la tâche ou aux pièces. Les ouvriers qui travaillent à ce système n'ont plus le souci de consacrer le temps nécessaire pour faire bien, ils se préoccupent surtout de gagner un maigre salaire, quelles qu'en soient les conséquences pour la clientèle et le public. Nous constatons les mêmes conséquences pour les travaux confiés aux femmes et aux enfants, plus particulièrement exploités, qu'ils soient occupés à la tâche ou à la journée, avec une rétribution sensiblement inférieure à celle de l'ouvrier.

Pour préciser, le système actuel des adjudications, qui invite indistinctement tous les patrons à soumissionner, est une excitation scandaleuse faite par l'Etat, les départements et les communes à porter atteinte aux intérêts des contribuables sous prétexte de les défendre, et une faveur non moins scandaleuse accordée aux patrons qui offrent des rabais couverts par l'abaissement du prix de la main-d'œuvre, par l'exploitation des enfants et des femmes, par la violation dissimulée des conditions requises par le cahier des charges. C'est favoriser, dans la plupart des cas, la concurrence contagieuse des mauvais patrons contre ceux qui payent consciencieusement leurs ouvriers.

Voilà l'œuvre, à peu d'exceptions près, du système des adjudications.

En faisant ces critiques contre le système des adjudications, nous ne voulons pas conclure pour la suppression de ce système; nous ne demandons pas davantage la suppression absolue des rabais. L'Etat, les départements et les communes ont pour devoir de veiller aux graves intérêts qui leur sont confiés, non seulement par une gestion *économique*, mais aussi par une surveillance attentive et énergique des travaux de toute nature exécutés en régie ou confiés à l'industrie libre.

La suppression des adjudications ne nous paraît guère possible : maintenant déjà nous avons des plaintes à élever contre les faiblesses de certains fonctionnaires. Que serait-ce si l'adjudication était supprimée et si les travaux étaient donnés selon le caprice des administrations ? Tous les fonctionnaires seraient accusés de corruption, fût-elle injustifiée.

Mais, ce que nous voulons signaler, — et c'est là le but de ce travail — c'est que les intérêts des ouvriers et ceux des patrons

sont impitoyablement sacrifiés, et nous estimons qu'il est très légitime de demander que ces rabais ne puissent porter atteinte aux salaires ni aux conditions normales du travail. L'Etat, les départements et les communes doivent tenir à honneur que ceux qui travaillent pour eux soient rétribués convenablement.

Faire connaître notre opinion, indiquer quelle réforme nous désirons ne suffit pas pour obtenir satisfaction. Nous devons rappeler les tentatives nombreuses qui ont été faites déjà par les municipalités pour obtenir la modification du système des adjudications.

C'est Paris que nous devons citer en première ligne, car le Conseil municipal de la grande ville a soutenu de longues et rudes luttes pour introduire dans les cahiers des charges des clauses qui respectent le salaire des ouvriers, réduisent la durée du travail, limitent le nombre des ouvriers étrangers, etc. De nombreuses séances de ce Conseil ont été consacrées à la défense des intérêts ouvriers et pour obtenir la consécration de ces améliorations. Constamment ces efforts se sont heurtés à l'opposition du ministre de l'intérieur, qui s'abritait toujours derrière les deux ordonnances que nous avons reproduites. Et si, par hasard, le ministre ou le préfet de la Seine autorisait des modifications interdites par les fameuses ordonnances, vite les patrons en cause en réfèrent au Conseil d'Etat. Il n'a jamais manqué d'annuler les délibérations du Conseil municipal de Paris.

Pourtant les salaires inscrits dans le tarif de la Ville de Paris, tarif établi par une commission composée d'architectes de la Ville, de délégués de patrons et de délégués ouvriers, ne représentaient que le salaire moyen appliqué dans chaque industrie ou résultant de conventions faites pour l'avenir entre patrons et ouvriers. Il est vrai que ce mode de procéder n'a pas été suivi lors de la révision du tarif, qui a eu lieu en 1882, à laquelle les patrons ont refusé de collaborer. Néanmoins, ces prix de série ont continué à servir de base d'appréciation au Conseil des prud'hommes, en l'absence de conventions contraires, pour régler les différends entre patrons et ouvriers.

En 1886, M. Longuet, alors conseiller municipal, défendait devant ses collègues une pétition des délégués ouvriers contenant une série de résolutions parmi lesquelles se trouvaient celles-ci :

- 1° La diminution de la journée à huit heures de travail ;
- 2° La suppression complète et absolue du marchandage ;
- 3° L'inscription au cahier des charges d'une clause obligeant absolument les adjudicataires à payer, pour les travaux de la

Ville, les prix de main-d'œuvre inscrits à la série (édition 1882).

Ces trois points avaient déjà été traités par M. Cernesson, dans un rapport communiqué au Conseil municipal dans sa séance du 31 juillet 1885.

Le Conseil municipal refusa d'entrer dans cette voie en décidant le renvoi du rapport pour étude complémentaire. C'est ainsi que M. Longuet fut chargé de présenter un second rapport qui concluait par un projet de délibération auquel le Conseil municipal consacra plusieurs séances nourries de discussions ardentes (années 1887 et 1888) et qui aboutirent au vote des conditions et clauses suivantes à introduire dans le cahier des charges :

1° Réduction à huit ou neuf heures de la journée. — Un jour de repos ;

2° Interdiction du marchandage ;

3° Etablissement d'un salaire minimum correspondant aux prix de série ;

4° Protection contre la concurrence des ouvriers étrangers ;

5° Inspection administrative et ouvrière des travaux.

Les délibérations des 27 avril, 30 décembre 1887 et 28 février 1888, ordonnant l'insertion de ces clauses et conditions dans les cahiers des charges furent annulées par un décret du 18 mars 1888.

A l'occasion des travaux de l'Exposition de 1889, M. Alphand, directeur des travaux, crut pouvoir appliquer une partie de ces conditions avec l'autorisation au moins tacite du gouvernement.

M. le préfet de la Seine ne fit aucune opposition, il proposa seulement au Conseil municipal de réduire ses prétentions, afin d'obtenir la sanction des pouvoirs publics.

Le Conseil municipal prit une nouvelle délibération le 2 mai 1888 ; les termes en étaient quelque peu différents des délibérations antérieures annulées.

M. le préfet de la Seine écrivit au ministre pour lui demander si les atténuations apportées par le Conseil ne permettaient pas de donner suite à sa délibération du 2 mai 1888. Un arrêté approbatif fut donné et les clauses et conditions du travail furent insérées dans les cahiers des charges.

M. Navarre, dans son rapport, déclare « que les travaux furent mieux faits, les malfaçons furent beaucoup moins nombreuses, et, chose non moins intéressante, l'augmentation des prix n'eut pas lieu ; les rabais ne furent pas moindres que par le passé, et les adjudicataires, ne pouvant pas faire porter leur rabais sur la main-d'œuvre, ne les firent pas supporter à la Ville. »

En décembre 1888, le Sénat et la Chambre votèrent un article,

à propos d'un projet d'imputation de 30 millions sur les fonds de l'emprunt de 1886, qui interdisait l'insertion de ces clauses dans les cahiers des charges.

Une deuxième intervention de M. le préfet de la Seine provoqua une nouvelle autorisation de M. le ministre de l'intérieur de faire appliquer les conditions du travail pour les travaux gagés sur l'emprunt de 1886.

C'est à ce moment que les entrepreneurs éliminés d'une adjudication pour refus de souscrire à l'insertion des clauses et conditions dans le cahier des charges demandèrent l'annulation de l'adjudication.

Le Conseil d'Etat leur donna gain de cause en annulant, pour excès de pouvoir, les arrêtés du ministre de l'intérieur.

#### ARRÊTÉ DU CONSEIL D'ÉTAT

##### *Travaux publics communaux. — Adjudication.*

##### *Cahier des charges.*

Pourvoi formé par la Ville de Paris contre un décret annulant une délibération du Conseil municipal qui avait pour objet l'insertion, dans un cahier des charges de travaux de la Ville, de clauses relatives à un minimum de salaire ou à un maximum d'heures de travail :

Le CONSEIL D'ÉTAT, statuant au contentieux, a, persistant dans la jurisprudence créée par un arrêt du 21 mars 1890 (1), rejeté le pourvoi de la Ville.

De nouveaux votes du Conseil municipal maintinrent les clauses et conditions du travail annulées par un nouveau décret ministériel. Des démarches furent faites auprès de la Commission parlementaire du travail, et un pourvoi devant le Conseil d'Etat fut

(1) Conseil d'Etat. — Arrêt du 21 mars 1890 ;

1<sup>o</sup> Une chambre syndicale d'entrepreneurs de travaux publics, agissant en leur nom direct et personnel, est-elle recevable à déférer au Conseil d'Etat pour excès de pouvoir les délibérations d'un conseil municipal, approuvant les conditions d'exécution des travaux communaux, ensemble la série de ces prix, et les arrêtés municipaux, mettant en adjudication divers travaux de la commune ? — *Rés. nég.* — Ces délibérations et arrêtés, considérés en eux-mêmes et en dehors de toute adjudication à laquelle les requérants auraient pris part, ne sont pas susceptibles d'être déférés au Conseil d'Etat.

2<sup>o</sup> Un entrepreneur, porté sur la liste d'admissibilité des entrepreneurs d'une ville, qui a été écarté, bien qu'ayant fait le plus fort rabais dans une adjudication spéciale, est-il recevable à demander l'annulation de la décision du bureau d'adjudication qui l'aurait évincé,

introduit par M. le préfet de la Seine contre l'arrêté ministériel qui avait pris un caractère beaucoup plus grave. Voici les termes de l'arrêt du Conseil d'Etat :

« Considérant que, par la délibération du 28 décembre 1890, le Conseil municipal de Paris a autorisé le préfet de la Seine à procéder à l'adjudication de divers travaux communaux, à condition d'imposer à l'adjudicataire l'obligation de payer à ses ouvriers un salaire minimum déterminé par la Ville, pour une journée de travail, dont elle avait également fixé le maximum de durée ;

« Considérant que, s'il appartenait au Conseil municipal de déterminer dans l'intérêt de la Ville les conditions de ces adjudications, il ne pouvait, sans sortir de ses attributions, substituer une réglementation imposée à l'effet légal des conventions entre patrons et ouvriers, et faire obstacle à l'application de l'ordonnance du 14 novembre 1837, qui oblige les communes à donner les entreprises pour travaux et fournitures avec concurrence et publicité ; qu'ainsi la Ville n'est pas fondée à soutenir que le décret attaqué, qui a annulé la délibération du 28 décembre 1890 par application de l'article 14 de la loi du 14 avril 1871, est entaché d'excès de pouvoir ;

« Décide :

« Article 1<sup>er</sup>. — La requête de la Ville de Paris est rejetée.

« Article 2. — Expédition... Intérieur, etc.

Ainsi, malgré l'expérience favorable des nouvelles conditions du travail, malgré l'intervention de MM. le directeur des travaux de Paris et le préfet de la Seine, même malgré l'autorisation de M. le ministre de l'intérieur, malgré les rapports des architectes, qui sont unanimes à déclarer que le système temporairement appliqué aux travaux de la Ville, avec clauses protectrices des intérêts ouvriers, a donné de bons résultats au point de vue de la rapidité et de la qualité du travail, et s'il n'y a pas eu dépense inférieure dans certains cas, il n'y a pas eu dépense supérieure ;

Malgré tout, les résultats des tentatives du Conseil municipal de Paris sont bien faites pour nous encourager à suivre la voie dans laquelle nous nous sommes engagés.

ensemble de l'arrêté préfectoral approubatif de cette décision? — *Rés. aff.*

3<sup>o</sup> Les clauses d'un cahier des charges de travaux publics communaux adoptées par un conseil municipal et approuvées par le préfet, qui imposent à l'adjudicataire, en faveur des ouvriers, un minimum de salaire et un maximum de durée de la journée — doivent-elles être réputées nulles et de nul effet, comme portant atteinte à la liberté du travail et des conventions entre patrons et ouvriers? — *Rés. aff.*

En conséquence, le refus par un entrepreneur, admis à concourir, de se soumettre à ces clauses, a-t-il pu motiver légalement, par lui seul, son éviction de l'adjudication, au profit d'un concurrent qui avait fait un rabais inférieur? — *Rés. nég.*

(Arrêt du Conseil d'Etat, 18 janvier 1895).

La longueur de ces détails doit nous être pardonnée; ils nous ont semblé nécessaires pour éclairer le sujet traité et arriver à cette démonstration que les ordonnances de 1836 et 1837 et l'interprétation exclusive — nous allions dire abusive — qui en est faite sont la source unique de l'échouement de tant d'efforts.

Le Conseil municipal de Paris, tout en affirmant le principe de ces diverses délibérations, a abandonné la lutte sur le terrain municipal pour la transporter sur le terrain législatif, en se ralliant au projet de M. Vaillant sur les travaux communaux pour toute la France.

Nous avons lu très attentivement le projet de loi de M. Vaillant, signé d'un grand nombre de ses collègues socialistes de la Chambre; l'exposé des motifs en est extrêmement intéressant et, tout en souscrivant à de nombreux passages de cet exposé, il nous semble imprudent d'en adopter les conclusions; elles nous conduiraient à un avortement en justifiant cet aphorisme : « Qui trop embrasse mal étreint. »

Les municipalités de Limoges, Toulouse, Toulon, Lorient, Albi, Béziers, Amiens, Perpignan, Grenoble, et d'autres villes de France, ont également essayé de sauvegarder les intérêts des travailleurs, par l'introduction des clauses et conditions du travail dans les cahiers des charges et partout les conseillers municipaux se sont heurtés à une fin de non-recevoir de la part du préfet ou à des réponses négatives dans le genre de celle qui suit et que nous avons déjà publiée dans la *Typographie Française* du 1<sup>er</sup> mars 1889 (communication de la section de Grenoble):

Voici le texte de la lettre reçue par nous, en réponse à la démarche que nous avons faite pour obtenir l'insertion, dans le cahier des charges de l'adjudication des travaux de la Préfecture, de la clause suivante : « Ne seront admis à concourir à l'adjudication que les imprimeurs ayant accepté le tarif de la Chambre syndicale. »

REPUBLIQUE FRANÇAISE

—  
Ministère de l'Intérieur  
—

« Paris, 22 novembre 1888.

« Monsieur le préfet, le Conseil général de l'Isère ayant voté, dans sa séance du 25 août dernier, la mise en adjudication de l'impression des procès-verbaux de ses délibérations, des rapports du préfet et des chefs de service, ainsi que d'autres imprimés payés sur les fonds départementaux, vous me faites savoir que la Chambre syndicale des ouvriers typographes de Grenoble vous a demandé, à la suite de ce vote, d'insérer dans le cahier des charges de l'entreprise une clause aux termes de laquelle ne seront admis à concourir que



les maîtres imprimeurs ayant adopté le tarif de la Chambre syndicale.

« Ainsi que vous le savez, Monsieur le préfet, les ordonnances de 1836-1837 et les décrets subséquents qui ont prescrit, sauf les exceptions limitativement prévues, la mise en adjudication des travaux de l'Etat, des départements et des communes, ont été inspirés par des considérations tirées de l'intérêt des finances publiques et par le désir de voir exécuter ces travaux dans les meilleures conditions d'économie.

« C'est dans cet ordre d'idées que les règlements sur la matière prescrivent une publicité aussi large que possible et une concurrence de nature à *assurer les plus forts rabais*.

« Les clauses contraires aux dispositions essentielles de ces règlements doivent donc être écartées de la rédaction du cahier des charges.

« Celle qui a été proposée par la Chambre syndicale des ouvriers typographes de Grenoble me paraît être de ce nombre, en ce qu'elle aurait pour conséquence de réduire, dans une certaine proportion, le taux des rabais, à raison de l'augmentation des salaires d'ouvriers imposés aux entrepreneurs.

« Je crois, en conséquence, devoir vous faire connaître que la proposition de la Chambre syndicale ne me semble pas pouvoir être accueillie.

« Recevez, etc.

« Pour le ministre :

« Le conseiller d'Etat, directeur de l'administration départementale et communale,

« Signé : BOUFFET. »

Rien n'est plus instructif ni plus concluant que ce document ; il justifie en tous points les critiques que nous avons fait valoir contre le système des adjudications.

Le but des adjudications est d'obtenir des rabais, quelles qu'en soient les conséquences : tant pis pour les ouvriers !

Il est donc interdit aux administrations de se soucier des conditions du travail des ouvriers ; sous prétexte d'obtenir les plus forts rabais, il faut sacrifier les intérêts des ouvriers et permettre tous les abus qu'entraîne ce beau système des adjudications. L'aveu est formel.

Mais à l'opposition que nous avons signalée de la part du ministre de l'intérieur, des préfets, du Conseil d'Etat, il faut encore mentionner l'opposition qui émane du côté des patrons qui s'abritent aussi derrière les ordonnances. Ici, une distinction s'impose entre les patrons qui ne refusent ni les adjudications ni les clauses nouvelles à introduire dans les cahiers des charges et ceux qui ne veulent pas s'y soumettre afin de pouvoir à leur guise imposer des conditions de travail plus ou moins onéreuses, suivant les devis des travaux qui leur sont adjugés.

En Belgique, les typographes ont poursuivi avec une rare persévérance, et dans toutes les villes où ils sont organisés, l'inscription dans le cahier des charges des travaux de l'Etat, des provinces et des communes, d'un minimum de salaire.

Ils ont réussi, disons-le à leur honneur, à créer un mouvement favorable et à introduire cette clause dans les cahiers des charges de nombreuses localités.

Cette campagne active de la part des ouvriers a provoqué chez les patrons belges une étude très remarquable de la question.

C'est à la suite d'une demande adressée à la Commission mixte du Cercle de la librairie et de l'imprimerie et de la Chambre syndicale des imprimeurs de Bruxelles, par l'Association libre des compositeurs typographes de Bruxelles, demande tendant à l'inscription d'un minimum de salaire pour les travaux exécutés pour le compte de l'Etat, que M. Buschmann, membre de cette Commission mixte, a présenté au Congrès international d'Anvers un rapport extrêmement remarquable, dans lequel sont soulevées quelques objections sérieuses contre l'introduction du minimum du salaire ; il en relève les difficultés qui en sont la suite.

Disons qu'un certain nombre de ces objections sont le fait d'une analyse trop rigoureuse, d'un raisonnement logique allant parfois jusqu'à l'absurde, considérant comme des obstacles insurmontables des détails secondaires, qu'aucun système ne pourra écarter.

Mais il en est d'autres qui ont plus de poids et sur lesquelles nous voulons nous arrêter un instant, parce qu'elles ont un caractère général et sont invoquées par des adversaires appartenant à diverses professions.

M. Buschmann envisage l'introduction du minimum de salaire sous trois aspects :

1° Par une convention verbale et tacite qui aboutit à la loi de l'offre et de la demande ; ce mode de fixer le salaire a toutes les préférences du rapporteur ;

2° La fixation du minimum de salaire par la loi : il conteste aux pouvoirs publics le droit d'intervenir pour fixer les salaires ;

3° Le dernier mode pour fixer le minimum de salaire consiste à faire inscrire, par les administrations publiques, dans leurs contrats, une clause qui décide de payer aux ouvriers et employés pour le compte de ces administrations ledit minimum, sans l'intervention du législateur.

Ces différents modes examinés sont entourés de considérations diverses qui n'ont pas grande valeur pour nous.

En premier lieu, la convention verbale et tacite entre patrons et ouvriers favorise cette fameuse loi de l'offre et de la demande ; elle caractérise d'une façon rigoureuse les abus que nous voulons supprimer, c'est-à-dire que, dans un moment de crise persistante comme celle que nous traversons, les patrons les moins scrupuleux, les plus cupides, peuvent soumissionner pour les travaux des administrations avec les plus forts rabais ; au nom de la loi de l'offre et de la demande, ils pourront recruter, également au rabais, un personnel qui souffre du chômage et inciter les autres patrons à suivre ce mauvais exemple. C'est l'exploitation de la misère, sous le prétexte hypocrite de liberté.

La deuxième objection, qui vise la fixation du minimum de salaire par la loi, ne nous semble pas soutenable, et, bien qu'elle soit pour ainsi dire la raison principale de toutes les résistances que nous rencontrons, c'est cette objection que nous prétendons combattre et détruire par une première interprétation du rôle de l'administration en cette matière : ce n'est pas au nom du législateur, au nom du gouvernement, que nous réclamons l'introduction de nouvelles clauses et conditions du travail dans les cahiers des charges, mais en considérant l'Etat, le département ou la commune comme un client ordinaire, un client qui doit donner le bon exemple, comme l'a dit M. Ribot dans son mémorable discours à la Chambre et qui a eu les honneurs de l'affichage ; ni l'Etat, ni le département, ni la commune ne doivent chercher à obtenir des fournitures à bon marché au détriment de la main-d'œuvre, au détriment même des intérêts des contribuables, si souvent invoqués.

Pour ces motifs, nous ne voyons aucune difficulté à appliquer le troisième mode signalé pour sauvegarder le salaire dans les cahiers des charges.

M. Buschmann invoque encore d'autres griefs — et en France on se sert des mêmes arguments — contre l'inscription d'un minimum de salaire dans les cahiers des charges ; il prétend que ce serait faire disparaître la concurrence, source de toute initiative ; les travaux émigreraient dans les communes où la main-d'œuvre serait moins chère ou même à l'étranger, et enfin ce serait une cause de sélection dans le personnel, au grand préjudice des ouvriers inhabiles ou âgés.

Aucune mesure, aucune modification, quelle qu'elle soit, ne peut être prise sans qu'elle entraîne avec elle quelque incon-

vénient ; il est bien rare — sinon impossible — que des restrictions, dans n'importe quel ordre, ne soient pas la source de quelques difficultés d'application ou ne portent atteinte à quelques intérêts. Mais, ce qu'il faut retenir, c'est que la somme des intérêts sauvegardés est bien supérieure à celle des intérêts qui seraient atteints.

La concurrence ne serait pas du tout détruite, attendu que la lutte entre soumissionnaires ne serait pas supprimée ; la concurrence aurait lieu sur la valeur des produits, sur l'habileté dans la direction des travaux, dans l'achat des matériaux ; mais il devrait être interdit de baser la concurrence sur l'exploitation de la main-d'œuvre, en la rétribuant au-dessous des tarifs locaux.

L'émigration du travail pourra être évitée — on le verra plus loin — par une clause spéciale dans le cahier des charges, aussi bien que l'on peut interdire aux marchands et aux sous-traitants de soumissionner.

La sélection du personnel n'est pas tant à craindre, elle ne se ferait pas autrement que maintenant ; chaque jour, nous voyons de bons ouvriers être évincés sans aucune pitié dès qu'ils dépassent la quarantaine ; les jeunes leur sont préférés, souvent à qualités inférieures.

Mais il n'y aurait là rien de bien nouveau, car le cahier des charges établi par l'administration des ponts et chaussées prescrit déjà aux entrepreneurs de choisir les ouvriers les plus habiles et les plus expérimentés ; et les ingénieurs ont le droit d'exiger le renvoi ou le changement des ouvriers qui ne remplissent pas ces conditions (1). Il est à remarquer qu'on ne s'est jamais plaint que ces clauses soient de nature à limiter la concurrence exigée par les ordonnances.

Cela n'est donc pas un obstacle sérieux, car l'entente sera facile pour admettre dans un atelier les ouvriers notoirement faibles ; personne ne songera à s'opposer à des conditions spéciales faites à des ouvriers dignes d'intérêt par leur âge ou leurs infirmités.

Il reste une objection dernière, au moyen de laquelle on prétend démontrer l'impuissance ou l'inutilité de toute mesure de protection ; c'est le défaut de sanction envers les adjudicataires qui transgresseraient les conditions imposées.

(1) Consulter le cahier des charges et conditions générales de l'administration des ponts et chaussées dans le *Livre de poche des Entrepreneurs et Concessionnaires de travaux publics*, de Théodore Chevalier, art. 4, 18, 19, 26 (pages 24, 25, 30, 31, 49).

Comme sanction, en cas d'infraction, après avertissement, il y a la pénalité pécuniaire et l'annulation de l'adjudication, exactement comme cela est prévu dans les ordonnances de 1836 et 1837, en cas de non-exécution des travaux dans les délais et dans les conditions fixés par le cahier des charges. Nous verrons encore plus loin ce qui se passe en Angleterre, avec quelle précision et quelle fermeté ces difficultés ont été tranchées.

Dans une question aussi importante, qui touche à des intérêts si menacés, il est puéril et d'une logique absurde de chercher des obstacles dans les plus infimes détails.

Et d'ailleurs, aussi bonnes que puissent être nos raisons pour obtenir satisfaction, pouvons-nous donner de meilleurs arguments que ceux qui ressortent du fait accompli, que de mettre sous les yeux des incrédules l'initiative prise par les pays voisins ?

Commençons par l'Allemagne (1).

La ville de Worms (Hesse-Darmstadt) fixe, dans les cahiers des charges des travaux qu'elle fait exécuter, le nombre des heures de travail par jour à imposer aux ouvriers : du 1<sup>er</sup> avril au 30 septembre, de 6 heures du matin à 7 heures du soir, avec une heure pleine et deux demi-heures d'interruption ; en mars et octobre, de 6 heures du matin à 6 heures du soir, avec repos comme ci-dessus, et dans les autres mois, de 7 heures du matin à 5 heures du soir, avec une heure d'interruption.

C'est la seule ville d'Allemagne qui insère dans les cahiers des charges des stipulations relatives aux conditions du travail.

#### AMÉRIQUE.

Nous avons trouvé dans le *Journal typographique*, organe officiel de l'Union typographique internationale de l'Amérique du Nord, un article concernant le Congrès de New-Jersey, où la question des adjudications a été agitée et l'objet d'un vœu que nous reproduisons plus loin.

Le président expose le but du Congrès : assurer la protection du métier dans le New-Jersey et sauvegarder ses intérêts en faisant appel à la législation. Une longue et très intéressante discussion s'ensuivit, après quoi le président chargea une commission de rédiger les résolutions exprimant les vœux du Congrès, de façon que le Comité exécutif de la Fédération des Trade-Unions de l'Etat pût préparer, avec les informations suffisantes, un pro-

(1) *Bulletin de l'Office du Travail*, novembre 1894.

jet de loi pour la Chambre des représentants de l'Etat. La commission présenta les résolutions suivantes, qui furent adoptées :

Considérant que le présent système d'adjudication des travaux d'impression de l'Etat est manifestement malhonnête et en désaccord avec les principes de l'Union ;

Considérant que diverses imprimeries de cet Etat obtiennent une proportion exagérée des travaux en question et payent des salaires inférieurs aux salaires payés par les autres imprimeries ;

Le Congrès des imprimeurs émet le vœu :

Que le système d'adjudication des travaux d'impression pour l'Etat soit aboli et que, pour tous ces travaux, on fixe un prix égal au tarif maximum payé dans le pays ;

Que tous ces travaux soient donnés par l'Etat à des imprimeries surveillées par l'Union typographique internationale ;

Que, dans toute imprimerie chargée de l'impression des lois, soit affiché le tarif établi.

Ces résolutions sont autrement catégoriques et rigoureuses que celles proposées à la fin de notre rapport.

L'importance des résultats obtenus en Angleterre nous oblige à citer presque en entier les renseignements recueillis dans le *Bulletin de l'Office du Travail* : c'est un fort intéressant historique de ce qui se fait à l'étranger. Nous engageons nos camarades à les lire avec attention, ils y trouveront un solide point d'appui pour défendre notre cause.

#### ANGLETERRE (1)

Il ne faut pas confondre l'intervention des pouvoirs publics ayant pour objet de fixer aux salaires en général des limites soit maxima, soit minima, avec l'adoption de certaines mesures applicables aux seuls travaux exécutés pour l'Etat ou les communes. Nous ne voulons indiquer ici que ce qui a été fait dans ce dernier ordre d'idées.

L'origine de la question, en Angleterre, se trouve dans les révélations faites devant la Commission de la Chambre des lords chargée de l'enquête sur le *sweating system*.

Des abus graves furent découverts dans l'exécution des contrats passés par les entrepreneurs avec les administrations publiques. Une agitation s'ensuivit et le 22<sup>e</sup> Congrès des *Trade-Unions*, tenu à Dundee, en 1889, s'occupa de la question ; il vota la résolution suivante (2) :

(1) Tous les renseignements qui vont suivre sur ce qui se fait à l'étranger sont puisés dans le *Bulletin de l'Office du Travail* d'août 1894 à mars 1895.

(2) Voir le *Rapport sur les grèves et lockouts de 1889*, par le *Labour Correspondent*, du Ministère du commerce. Londres, 1890 (C. 6176).

Le Congrès engage toutes les *Trade-Unions* à user de leur influence pour amener les municipalités et autres corps constitués à inscrire dans tous les cahiers des charges des adjudications de travaux publics la stipulation suivante : « On ne pourra payer aux « ouvriers embauchés de divers corps de métiers des salaires inférieurs aux cours actuels des salaires (*standard rate of wages*) . » Le Congrès recommande en outre à sa Commission parlementaire (1) de faire tous ses efforts pour que l'on inscrive une clause analogue dans les cahiers des charges des travaux de l'Etat.

A la suite de ce Congrès, les *Trade-Unions* ont obtenu des différentes administrations publiques l'insertion dans les cahiers des charges de clauses destinées à garantir le paiement de salaires équitables (*fair wages*) et à empêcher le surmenage (*sweating*) causé par le marchandage.

En 1889, le *School Board*, de Londres, a inséré dans le cahier des charges de ses adjudications de travaux typographiques une clause ainsi conçue :

Les soussignés s'engagent à payer aux ouvriers qu'ils emploient, au minimum, le cours actuel du salaire (*the minimum standard rate of wages*) dans chaque branche de l'industrie.

Il résulte de renseignements que nous avons reçus, que des amendes élevées, allant de 5 à 25 livres sterl., sont appliquées à chaque infraction du cahier des charges : salaires, conditions et durée du travail. Dans les districts où ce taux de salaires n'est pas appliqué, l'entrepreneur doit s'engager à ne pas payer moins du minimum du salaire courant.

En outre, interdiction absolue de céder l'adjudication à un sous-traitant, sous peine de rupture du contrat.

A son tour, le Conseil de comté de Londres a introduit, en 1889, dans son règlement intérieur (*standing orders*) l'article suivant :

Quiconque soumissionnera pour une adjudication du Conseil de comté devra déclarer qu'il paye les salaires et fait travailler le nombre d'heures qui sont généralement considérés comme équitables (*fair*) dans son industrie ; au cas où il serait prouvé qu'il agit différemment, sa soumission ne serait point acceptée.

Si l'adjudicataire cède tout ou partie de son contrat à un sous-traitant, son contrat se trouve résilié ; il doit en outre payer une somme de L. 500 (12,500 francs) à titre de dédit (*forfeit*).

(1) Commission permanente composée généralement des membres les plus influents des *Unions* : elle est chargée des rapports avec le Parlement ; elle avise aux mesures à prendre pour faire aboutir les *bills* qui intéressent les *Unions* ou pour combattre ceux qu'elles considèrent comme contraires à leurs intérêts.

L'année suivante, le Congrès des *Trade-Unions*, tenu à Liverpool, revint à la charge. Il vota, à la presque unanimité, une résolution invitant sa Commission parlementaire à obtenir que, dans tous les cahiers des charges des administrations de l'Etat, une clause fût insérée prohibant le marchandage (*subletting*) et qu'aucune adjudication ne fût prononcée au profit d'une maison qui ne payerait pas à ses ouvriers les « salaires d'après le taux reconnu par les *Trade-Unions* » pour la localité où les travaux sont faits soit par les agents directs du Gouvernement ou de la municipalité, soit par des adjudicataires ayant passé un contrat avec l'autorité compétente (1).

Cette résolution est plus précise que celle de 1889. Les *Trade-Unions* ne se contentent pas d'une clause assez vague relative aux « salaires équitables » ; elles demandent que le taux établi par elles-mêmes, qui tendent à être les régulatrices du salaire dans chaque métier, soit adopté et inséré au cahier des charges. La réclamation pressante du Congrès fut entendue.

Dans son rapport pour l'année 1891 (2), le *Labour correspondent* du ministère du commerce constate que beaucoup d'administrations publiques ont aujourd'hui pour principe d'inscrire dans les cahiers des charges une clause exigeant qu'on paye aux ouvriers les salaires reconnus comme équitables par les *Trade-Unions* et qu'on observe la durée et les conditions de travail en usage dans chaque industrie.

Un des effets de cette réforme a été d'augmenter la tendance des administrations publiques à entreprendre directement des travaux publics, au lieu de recourir aux entrepreneurs.

Le 13 février 1891, la Chambre des communes, intervenant à son tour, adopta, sur la proposition de M. Sydney Buxton, une résolution ainsi conçue :

La Chambre est d'avis qu'il est du devoir du gouvernement, dans les divers contrats qu'il passe, de prendre des mesures contre les maux révélés par l'enquête sur le *sweating system*, d'insérer des clauses destinées à empêcher le retour des abus nés des sous-entreprises et de faire tout ce qui est en son pouvoir pour assurer le paiement de salaires égaux à ceux qui sont généralement considérés comme courants pour les ouvriers exercés dans chaque métier.

Le rapport sur les grèves de 1891 donne, de la page 102 à la page 113, le texte des circulaires envoyées aux entrepreneurs, ad-

(1) *Rapport sur les grèves de 1890.* (C. 6476) 1892, p. 39.

(2) *Rapport sur les grèves de 1891.* (C. 6892) 1893, p. 102.



judicataires, etc., par les administrations publiques (ministères de la guerre, de la marine, du commerce, de l'intérieur, etc.), en exécution de la résolution votée, le 13 février, par la Chambre des communes.

Le Conseil de comté de Londres a été plus loin encore que les administrations de l'Etat. Tandis que celles-ci changeaient plutôt l'esprit dans lequel l'exécution des contrats est surveillée que la méthode même d'exécution (1) et recouraient surtout à un contrôle plus sévère des entrepreneurs, le Conseil de comté de Londres inscrivait dans son règlement intérieur (*standing orders*) une série de dispositions très précises et très strictes.

Une liste des salaires et des heures de travail par corps de métier, représentant les conditions que le Conseil entend appliquer dans les travaux qu'il entreprendra directement, est dressée par la commission des travaux publics du conseil suivant les indications fournies par les associations ouvrières qui en sont arrivées depuis longtemps, en Angleterre, à réglementer dans chaque profession les conditions du travail. Une enquête est entreprise à l'effet d'établir si les salaires et les heures déclarés par les associations ouvrières sont réellement pratiqués.

La liste des salaires et heures de travail comprend dans la première colonne le nom du métier, dans la seconde le tarif par heure, dans la troisième le nombre d'heures de travail par semaine, dans la quatrième le tarif pour les heures supplémentaires.

Cette liste, après avoir été approuvée par le Conseil et affichée dans le hall, est soumise à tout moment à l'examen du public. Elle est toujours revisable après nouvelle enquête, dans le cas où le marché du travail viendrait à accuser des variations.

En cas d'adjudication, le soumissionnaire s'engage à payer les salaires et à observer la durée du travail fixés dans la « liste » dressée par le Conseil de comté. Pour chaque contrat, les conditions imposées sont celles qui étaient en vigueur au moment de la soumission. Dans les cahiers des charges, des sanctions sont prévues pour l'exécution de ces engagements ; ces sanctions se présentent sous forme non pas d'amendes, mais de dommages-intérêts ; pour chaque infraction aux conditions fixées pour les

(1) Les agents du gouvernement exercent sur le paiement des salaires une surveillance constante qui s'ajoute à celle des ouvriers eux-mêmes, et la violation des conditions du contrat entraîne non pas la résiliation de celui-ci, mais la radiation de l'entrepreneur de la liste des personnes admises à concourir ultérieurement.

salaires, dommages-intérêts dus : 5 livres sterling ou 125 francs ; — pour chaque infraction aux conditions de durée du travail, 5 shillings ou 6 fr. 25 c. par homme, pour chaque heure où pareille infraction aura été relevée, à moins que les heures supplémentaires ne soient reconnues par les Trade-Unions intéressées ; — l'entrepreneur s'engage à tenir un livre de paye, toujours au courant et sincère, et à le présenter à chaque réquisition, sous peine d'une amende de 75 francs ; on peut exiger, par un avis donné sept jours à l'avance, une déclaration affirmant l'exactitude de ce livre ou d'indiquer en détail les erreurs qu'il contient. Toute inexactitude expose le contractant à une amende de 250 fr. ; — l'entrepreneur s'engage à ne céder à personne tout ou partie de son contrat ; il s'engage aussi à ne point faire de sous-contrat pour l'exécution de l'entreprise qui lui a été adjugée, sans l'autorisation écrite du Conseil de comté ; — en cas d'infraction à cette règle, il est redevable, pour chaque infraction, d'une somme de 120 liv. st. ou 3,125 francs.

Il existe, en outre, une disposition obligeant, sous peine d'une amende de 25 francs par jour, à afficher le tableau des salaires et des heures de travail dans chaque fabrique, atelier, etc., où se font des travaux pour l'adjudicataire.

Une autre clause autorise le Conseil à payer aux ouvriers lésés la différence qu'ils pourraient recevoir en moins sur les salaires prescrits par le tableau. Le Conseil pourrait alors retenir les sommes payées de ce chef sur ce qu'il peut devoir à l'adjudicataire.

Depuis, le Conseil de comté de Londres a été plus affirmatif, il a adopté la résolution suivante :

Dans le cas où il n'existerait pas, dans une industrie quelconque, le taux de salaire reconnu par les Unions et pratiqué constamment, le Conseil fixera lui-même le minimum des salaires, le maximum des heures à fournir et les conditions du travail.

Divers services de l'Etat, les ateliers des ministères de la guerre et de la marine ont appliqué ces dispositions.

Les sous-contrats sont de même minutieusement réglés.

Le Conseil de comté de Londres paraît avoir été le premier à fixer d'une façon aussi précise les conditions du travail dans les grands travaux publics. Plusieurs autres grandes villes du royaume ont suivi cet exemple.

Il faut bien remarquer que le Conseil de comté de Londres ne se préoccupe nullement comme les *Trade-Unions* du principe du *living wage*, mais qu'il se borne à constater un état de fait.

Le nombre officiellement connu des districts sanitaires urbains (1), dans lesquels les contrats passés par les autorités pour l'exécution de travaux spécifient des conditions relatives aux salaires ou en général au travail des ouvriers employés par l'entrepreneur, s'élève à 141, nombre considérable et très concluant en faveur de la thèse que nous soutenons. Les exemples qui suivent peuvent être opposés aux arguments de nos détracteurs.

Nous avons groupé sous huit rubriques différentes les principales conditions maintenues dans les cahiers des charges de ces districts urbains, en indiquant les localités où elles sont appliquées.

Quelquefois certains cahiers des charges ne contiennent qu'une de ces clauses ; généralement ils en renferment plusieurs, comme nous l'indiquons ci-dessous.

a.) L'entrepreneur doit payer au minimum le taux du salaire courant de la localité (*the standard rate*) :

Barrow, Birmingham (2), Bolton, Bootle, Bradfort, Brighton, Bristol, Cardiff, Derby, Dudley, Exeter, Gloucester, Grimsby, Ipswich, Kingston-upon-Hull, Leeds, Leiceister, Liverpool, Manchester, Newport (Mon.), Northampton, Norwich, Nottingham, Oldham, Orfort, Plymouth, Salford, Sheffield, Southampton, South, Shields, Stockport, Swansea, Walsall, West Ham, Wolverhampton, Worcester, York, Accrington, Ashton-under-Lyne, Barnsley, Batley, Blackpool, Bournemouth, Burton-on-Trent, Carnarvon, Crewe, Darwen, Dewsbury, Droitwich, Guildford, Ilkeston, Keighley, Kingston-on-Thames, Mansfield, Richmond (Surrey), Rochester, Rotherham, Scarborough, Stockton-on-Tees, Tynemouth, Wakefield, Wednesbury, West-Hartepool, Widnes, Barry and Cadoxton, Benwen and Fenham, Castleford, Edmonton, Fulwood (tarif de salaires), Llanfairfechan (ouvriers payés à l'heure), Merthyr Tydfil, St-Ann's-on-Sea, Sevenoaks, Shipley, Teddington Tottenham, Walthamstow, Whitby (toute contestation relative au salaire sera portée devant un arbitre désigné par le règlement), Barnoldswick (la paye se fera au chantier).

Soit 79 districts.

(1) Les autorités des districts sanitaires urbains sont chargés de faire exécuter une grande partie des travaux de voirie, d'adduction d'eau, etc., et d'une manière générale les travaux faits en vue de l'assainissement.

(2) Les entrepreneurs payeront à tous les ouvriers occupés dans les chantiers au moins le salaire minimum courant pratiqué à Birmingham pour des travaux de même nature. Si la corporation peut prouver que les entrepreneurs ont payé des salaires inférieurs au minimum prescrit plus haut, lesdits entrepreneurs seront tenus de payer à la corporation la somme de 25 francs (20 shillings) toutes les fois qu'ils auront ainsi contrevenu à l'engagement ; la corporation pourra retenir les sommes ainsi acquises sur celles qu'elle doit ou pourra devoir aux entrepreneurs, conformément aux clauses du contrat.

b.) 1° L'adjudicataire ne pourra rien céder de ses travaux à un sous-entrepreneur sans une autorisation spéciale :

Gloucester, Grimsby (défense absolue), Leeds, Liverpool, Oxford, (défense absolue), South, Shieds, Wolverhampton, York, Accrington (défense absolue), Eastbourne, Kingston-on-Thames, Widnes, Barry and Cadoxton, Castleford, Shiplez, Walthamstow.

Soit 17 districts.

2° L'adjudicataire ne pourra céder à un sous-entrepreneur que les parties qui ne sont pas de son métier ordinaire :

Bootle, Dudley, Ipswich, Darwen, Scarborough, West-Hartlepool.

Soit 22 districts.

c.) L'adjudicataire ne doit employer que des ouvriers formés et compétents :

Bath, Berwick-on-Tweed (1), Bournemouth, Burslem, Dartmouth, Hardness, Dewsbury, Southen-on-Sea, Wells (21 ans au moins), Wokingham, Milford, Rhyl, Altrincham, Barnoldswsch, Bexley (18 ans au moins), Bishop-Auckland, Bridgend, Brierley Hill, Burgess Hill, Consett, Dartford, East Barnett Valley, Edmonton (21 à 45 ans), Failsworth, Finchley, Friern Barnett, Garw and Ogmere, Heaton Norris, Hebden Bridge, Hitchin, Hornsey (contre-maitre compétent), Lower Brixham, Merthyr Tydfil, Norden, Quickmere, Rhymney, Royton, Sevenoaks, Sanklin, Sherborne, Shildon and East Tickley, South Hornsey, Sutton, Tynemouth, Todmorden, Uppermil, Uxbridge, Wallsend, Waterloo with Seaforth, West Derby, Westhoughton, Withefield, Willington quay, Witham, Withington, Woodford, Worskop, Hastings.

d.) L'adjudicataire ne doit pas faire travailler au-delà d'un certain nombre d'heures par jour :

Bootle, Brighton, Cardiff, Derby, Gloucester, Grimsby, Ipswich, Kingston-upon-Hull, Leeds, Liverpool, Oldham, Phymouth, Sheffield, Stockport, Swansea, West Ham, Wolverhampton, York, Accrington, Asthon-under-Lyne, Barnsley, Batley, Blackpool, Burton-on-Trent, Carnarvon, Guildford, Keighley, Kingston-on-Thames, Richmond, Rotherham, Scarborough, Stockton-on-Tees, Wakefield, West Hartlepool, Widness, Barry and Cadoyton.

Soit 36 districts.

e.) Une amende est spécifiée pour la non-observation des conditions relatives au salaire et à la durée du travail :

(1) Si le surveillant des travaux juge un ouvrier incompetent ou trouve qu'il se conduit mal, et s'il en prévient par écrit l'entrepreneur, ce dernier devra, dans les vingt-quatre heures qui suivront, renvoyer l'ouvrier visé. Au cas contraire, le surveillant est autorisé à renvoyer lui-même l'ouvrier et à en embaucher un autre aux frais du patron. Ces frais pourront être prélevés sur la première somme à payer à l'entrepreneur d'après le contrat.

Birmingham, Brighton (1), Bristol, Ipswich, Kingston-upon-Hull, Nottingham, Salford, Sheffield, South Shields, York, Blackpool, Carnarvon, Kingston-on-Thames, Rochester, Scarborough, West-Hartlepool, Keighley.

Soit 17 districts.

f.) Préférence sera donnée aux entrepreneurs et aux ouvriers de la localité :

Gloucester, Droitwich, Loughborough, Ramsgate, Acton, Barry and Cadoxton, Darlaston, East Grinstead, Erith (*tous travailleurs de la localité*).

Soit 9 districts.

g.) Les adjudicataires seront tenus de faire respecter les clauses du contrat par les sous-adjudicataires :

Nottingham, Worcester, Bournemouth, Crewe, Ilkeston, Wednesbury, Burton-on-Trent.

Soit 7 districts.

h.) Affichage du contrat et des règlements :

New Swindon.

Soit 1 district.

D'autre part, dans 835 villes, de peu d'importance en général et n'ayant pour la plupart pas encore ordonné de travaux, les autorités sanitaires n'ont pas inscrit des clauses de ce genre dans leurs cahiers des charges. Toutefois, dans dix d'entre elles, on a édicté ou proposé d'édicter des prescriptions relatives aux salaires, heures de travail, etc.

a.) Salaires (le minimum ne pourra être inférieur à la moyenne courante de la localité) :

Burnley, Stafford, Gildersome (50 centimes l'heure), Portland (proposition), Halifax, Heywood (pas de clause spéciale, mais en-

(1) Au cas où l'entrepreneur ne payerait pas les salaires courants, il verserait à l'autorité municipale, sous forme de dommages, une somme équivalente à la différence existant entre le montant des salaires payés actuellement aux ouvriers et ceux qu'il doit leur payer conformément au contrat ; l'autorité pourra retenir cette somme sur celles qu'elle peut devoir à l'entrepreneur conformément au contrat, ou qu'elle peut se faire allouer par une action judiciaire.

Heures de travail..... Au cas où l'entrepreneur n'observerait pas la coutume relative à la journée de travail, il devra verser à l'autorité municipale, sous forme de dommages, une somme équivalente à la différence entre le montant total des salaires payés actuellement aux ouvriers et le montant de ceux qu'il aurait eu à payer s'il s'était conformé à la présente clause ; l'autorité pourra retenir, etc., etc.

En d'autres cas, l'entrepreneur est passible d'une amende variant de 25 à 1,250 francs pour chaque infraction à ces clauses.

quête spéciale sur les pratiques de l'entrepreneur, avant l'adjudication), Warrington (proposition).

b). Sous-adjudication (autorisation nécessaire) :

Stafford, Warrington (proposition).

d.) Heures de travail (limitées par l'usage local) :

Halifax, Warrington (proposition).

f.) Préférence donnée aux entrepreneurs et ouvriers de la localité :

Dorking (rapporté par suite de l'insuffisance des ouvriers locaux), Ilford.

Nous prions ceux qui se donnent la peine de nous lire de bien remarquer non seulement les nombreuses localités, mais aussi les cas multiples de protection qui sont signalés dans la nomenclature qui précède.

L'intervention de l'Etat, en Angleterre, a donc pris un caractère très énergique. Nous ne pouvons mieux faire que de reproduire le langage du secrétaire d'Etat pour le département de la guerre, M. Campbell-Bannerman, à la Chambre des communes :

J'ai donné tous mes soins à l'étude de la question de réduction des heures de travail dans les ateliers militaires, sur laquelle mon honorable ami, d'autres membres du Parlement et des délégations ouvrières avaient appelé mon attention. Le résultat de mon enquête a été de me convaincre, ainsi que mes collègues, que les conditions et circonstances de la fabrication, ainsi que la nature du travail de ces ateliers, sont telles qu'il est possible d'y réduire la durée de travail à huit heures par jour et à quarante-huit heures par semaine, à l'avantage commun du service public d'une part et des ouvriers d'autre part. Je donnerai les instructions nécessaires pour que ce changement soit opéré, aussitôt que les émarquements nécessaires à cet effet auront été pris. J'ajouterai que, pour ce changement, je compte sur le concours cordial de tous les ouvriers à qui, j'en ai confiance, il sera de grand avantage.

Le 19 mars 1894, le comte Spencer, premier lord de l'Amirauté, déclare à son tour que, donnant suite à la réforme qui était en train pour les arsenaux de la guerre, le Gouvernement avait décidé de la réaliser de même dans les arsenaux de la marine.

Nous ne saurions achever cette étude sur l'Angleterre sans citer les paroles de William Blades, grand imprimeur de Londres, aujourd'hui décédé :

J'ai la ferme opinion que le syndicat, avec toutes ses imperfections, est une institution nécessaire, également utile aux patrons, aux ouvriers et au bien-être général... Le bénéfice du syndicat pour les patrons est pour moi indéniable. Dans ces jours de

concurrence à outrance, quand un travail important est mis en adjudication, le point capital pour un patron est de savoir que ses concurrents payeront leurs ouvriers au même prix qu'il paye les siens. Très souvent, il arrive que l'anxiété d'obtenir un travail conduit un patron à accepter ce travail à un prix dérisoire, et il s'aperçoit ensuite, mais trop tard, qu'il ne couvrira même pas ses frais. Alors, il n'a plus qu'un but : abaisser le prix de revient, et, naturellement, ce sont les salaires qui le tentent d'abord. Dans un cas semblable, le travailleur, non soutenu par le syndicat, serait à la merci de ce patron, et les réductions succéderaient aux réductions jusqu'à ce que le *sweating system* soit atteint.

Le patron, qui jusqu'alors avait bien payé ses hommes, serait, de ce fait, contraint d'entrer dans la même voie, ou bien de voir sombrer son industrie. On verrait donc surgir toute une série de grèves, et la formation de nouveaux syndicats ; il y aurait partout antagonisme, et la guerre serait déclarée entre le Capital et le Travail — comme résultat de ce qui est appelé « liberté de contrat ». Ce mot *liberté* est peut-être le plus mal employé dans notre langage. L'obéissance à une échelle de prix généralement reconnue n'annihile pas la liberté du patron pour traiter avec ses ouvriers. Au contraire, c'est l'absence des syndicats qui aggraverait la compétition à outrance et mènerait à la tyrannie d'une part et à la haine de l'autre.

Cette citation, extraite du tarif typographique de Manchester, est d'une remarquable précision dans le jugement, elle sanctionne à merveille les observations que nous avons déjà soumises.

#### BELGIQUE.

D'après les discours prononcés soit à la Chambre des représentants de Belgique l'an dernier, soit au Conseil supérieur du Travail belge, la ville de Bruxelles aurait, en 1855, fait la première expérience de l'inscription d'une série de salaires obligatoires dans le cahier des charges des travaux de la Ville. Cette mesure fut prise à la demande de patrons, à la suite d'un renchérissement général de toutes les denrées qui se produisit après la découverte des gisements aurifères de Californie et d'Australie.

La clause disparut du cahier des charges en 1865.

Plus récemment, elle a été reprise à Bruxelles en 1877 et par diverses communes et certains conseils provinciaux : Saint-Gilles (1884), Saint-Josse-ten-Noode et Schaerbeek en 1885, puis Molenbeck, Ixelles, Roulers, etc. Les conseils provinciaux du Brabant, du Hainaut, de la Flandre occidentale et de la Flandre orientale auraient fait également quelques applications de clauses analogues. Ce fut cette fois à l'instigation des unions professionnelles ouvrières.

## CLAUSES RELATIVES AU MINIMUM DE SALAIRES

INSÉRÉES, A TITRE D'ESSAI,

DANS LES CAHIERS DES CHARGES DES TRAVAUX COMMUNAUX, PROVINCIAUX, ETC.

*Décision du 14 juillet 1893 du Conseil provincial  
de la Flandre orientale.*

Art. 1<sup>er</sup>. — La députation permanente est autorisée à insérer à titre d'essai, dans les cahiers des charges des adjudications de la province, une clause obligeant l'entrepreneur à payer à ses ouvriers le salaire communément admis dans la région pour le travail auquel ces ouvriers sont employés.

Art. 2. — Le taux de ce salaire sera constaté par la Députation permanente, après avoir pris l'avis des Conseils de l'industrie et du travail.

Cette résolution n'est applicable qu'aux ouvriers employés dans les circonscriptions des Conseils de l'industrie et du travail et aux industries représentées au sein de ces Conseils.

Art. 3. — La Députation permanente est munie de tous les pouvoirs nécessaires pour vérifier et assurer la loyale exécution des clauses des cahiers des charges.

Art. 4. — Un rapport annuel sera présenté par la Députation permanente au Conseil provincial sur les résultats pour les ouvriers et les patrons et les conséquences pour la province de l'essai autorisé par l'article 1<sup>er</sup>.

*Décision du 29 juillet 1893 du Conseil provincial du Brabant.*

En conséquence, votre deuxième section vous propose de charger la Députation permanente d'inscrire dans les cahiers des charges à publier pour les travaux et fournitures de la province une clause stipulant un salaire minimum considéré comme la limite extrême inférieure à accorder aux ouvriers par les soumissionnaires.

Transactionnellement, l'administration pourrait tolérer l'emploi d'ouvriers débiles au taux auquel ils sont payés tout le long de l'année par leur patron.

Le minimum de salaire sera différentiel pour les travaux à exécuter pour la ville et la campagne.

Les fonctionnaires de la province attachés aux services techniques seront chargés, à chaque entreprise, de fournir aux administrations publiques les renseignements nécessaires pour obtenir le minimum de salaire, en tenant compte des circonstances de temps et de lieu.

Le cahier des charges devra interdire à l'entrepreneur d'éluder le minimum de salaire par un procédé quelconque, soit en traitant à forfait avec des sous-entrepreneurs, contremaîtres, ouvriers ou manœuvres pour tel ou tel travail déterminé.

Elle inscrira au cahier des charges tels moyens d'investigation et de sanction qu'elle jugera nécessaires.



VILLE DE BRUXELLES. — Le cahier des charges, dans lequel la ville de Bruxelles compte insérer semblable clause de salaire minimum, à titre d'essai, pour les travaux de menuiserie, n'est pas encore arrêté définitivement. Voici la rédaction projetée :

L'entrepreneur est tenu de payer à ses ouvriers un salaire minimum de 40 centimes par heure. L'entrepreneur devra permettre aux agents de l'administration de s'assurer, soit en consultant les livres, soit en interrogeant les ouvriers, que cette disposition est respectée. Un écritéau reproduisant cette clause du contrat sera placée dans les ateliers de l'entrepreneur.

L'administration communale de Bruxelles ajoute qu'il est possible que cette rédaction doive être modifiée lorsque le cahier des charges sera discuté.

*Le Conseil d'administration des hospices et secours de la ville de Bruxelles* a mis en adjudication publique la fourniture des imprimés, registres et papiers nécessaires au secrétariat général, aux hôpitaux et hospices et aux comités de charité, pendant trois années qui prendront cours le 1<sup>er</sup> janvier 1896.

Parmi les conditions générales du cahier des charges, nous trouvons les stipulations suivantes :

Art. 19. — L'entrepreneur du premier lot aura à payer un minimum de salaire aux ouvriers qu'il emploiera pour l'exécution de son entreprise.

Ce minimum sera, pour les typographes, imprimeurs et conducteurs, celui du tarif arrêté par l'Association libre des compositeurs et imprimeurs typographes de Bruxelles, le 1<sup>er</sup> janvier 1892.

Pour les ouvriers relieurs, le minimum est de 40 centimes l'heure.

L'entrepreneur placera dans ses ateliers, à des endroits apparents, des écriteaux indiquant le minimum des salaires.

Il est interdit à l'entrepreneur d'éluder le minimum de salaire par un procédé quelconque, notamment en traitant à forfait avec des sous-entrepreneurs, contremaîtres, ouvriers ou apprentis, pour des travaux déterminés.

L'entrepreneur produira à toute réquisition les feuilles de salaire et les fera viser par M. le préposé au magasin des imprimés ; le défaut de production de cet état dans les vingt-quatre heures entraînera pour l'entrepreneur une amende fixe de 10 francs par jour de retard.

Il sera imposé à l'entrepreneur une amende fixe de 5 francs par ouvrier et par jour, pour chaque contravention au minimum de salaire.

Cette amende, stipulée en faveur de l'administration, est indépendante des droits que l'ouvrier aurait à faire valoir contre son patron devant les juridictions compétentes.

COMMUNE DE SAINT-JOSSE-TEN-NOODE. — *Travaux de pavage (Cahier des charges approuvé le 9 mai 1892.* — L'adjudication portait sur la période 1<sup>er</sup> juillet 1892-30 juin 1894 :

Art. 56. — L'entrepreneur sera tenu de payer un salaire minimum de 40 centimes l'heure aux ouvriers et de 25 centimes l'heure aux aides ou manœuvres.

En cas de manquement à l'article 56, sans préjudice à la résiliation du contrat, avec dommages-intérêts, qui pourra être provoquée conformément à l'article 1184 du Code civil, le Collège échevinal, après une simple information écrite et l'entrepreneur entendu, pourra, sauf recours au Conseil, appliquer au contrevenant une amende fixe de 500 francs et en plus 5 francs par jour de retard dans la stricte observation de ses engagements. Le montant de ces amendes sera prélevé sur les sommes dues à l'entrepreneur et sur le cautionnement, s'il en existe.

COMMUNE DE MOLENBEEK-SAINT-JEAN. — *Travaux de pavage (26 janvier 1892).* — L'adjudication portait sur la période 1<sup>er</sup> mai 1892-30 avril 1895 :

Art. 12. — Pour ce qui concerne les menues réparations ou repiquages, l'entrepreneur se conformera aux conditions prescrites pour les relevés à bout.

Pour ces travaux, l'entrepreneur ne pourra se servir que d'ouvriers expérimentés et de manœuvres âgés d'au moins quinze ans, auxquels il payera, au minimum, aux premiers 38 centimes l'heure et, aux seconds, 22 centimes.

COMMUNE DE SAINT-GILLES. — *Travaux d'entretien et de pavage des rues, etc. (19 décembre 1893).* — Durée de l'entreprise : un an ou trois ans, au choix de l'administration, à partir du 1<sup>er</sup> janvier 1894 :

Art. 2. — L'entrepreneur aura à payer un minimum de salaire de 35 centimes l'heure aux ouvriers et 25 centimes l'heure aux manœuvres qu'il emploiera pour l'exécution de son entreprise.

Il placera sur le chantier des travaux, chaque fois que l'ordre lui en sera donné, bien en vue, des écriteaux indiquant le minimum de salaire. Le texte de ces avis sera soumis à l'approbation du Collège.

Il est interdit à l'entrepreneur d'éluder le minimum de salaire par un procédé quelconque, notamment en traitant à forfait avec des sous-entrepreneurs, contremaitres, ouvriers et manœuvres.

Art. 3. — L'entrepreneur produira toutes les semaines, au Collège des bourgmestres et échevins, les feuilles de salaire certifiées exactes par lui ; le défaut de production de cet état, dans les deux jours de l'expiration de la semaine, entraînera pour l'entrepreneur une amende fixe de 10 francs par jour de retard.

Art. 4. — Il sera imposé à l'entrepreneur une amende fixe de 5 francs par ouvrier lésé et par jour, pour chaque contravention au minimum de salaire. Cette amende, stipulée en faveur de la

commune, est indépendante des droits que l'ouvrier aurait à faire valoir contre son patron devant les juridictions compétentes.

Art. 5. — L'amende ne sera appliquée, indépendamment de ce qui est dit ci-dessus relativement à la production des feuilles de salaire, que sur la plainte d'un ouvrier, cette plainte, après enquête, ayant été reconnue fondée. Copie du dispositif de la décision du Collège sera adressée au patron et à l'ouvrier.

COMMUNE DE SAINT-GILLES. — 1<sup>o</sup> *Ensemencements, plantations avec fouilles, etc., à effectuer au nouveau cimetière* (23 janvier 1894). — 2<sup>o</sup> *Reconstruction d'un égout (projet)*. — Mêmes stipulations que ci-dessus, sauf le taux du minimum de salaire, fixé à 32 centimes l'heure dans la première de ces entreprises.

COMMUNE D'IXELLES. — *Construction d'un égout (projet)* :

Art. 6 à 11. — Même sens que les articles cités pour la commune de Saint-Gilles et texte presque identique.

VILLE DE MALINES. — Clause de salaire minimum inscrite actuellement dans les cahiers des charges de la ville :

Les entrepreneurs sont tenus de joindre à leur soumission le tableau du minimum des salaires qu'ils s'engagent à payer à leurs ouvriers ; ce tableau sera dressé conformément au modèle ci-annexé.

VILLE DE ROUSSELARE. — *Construction d'une école* (8 septembre 1893) :

Art. 41. — Minimum de salaire. L'entrepreneur a l'obligation de payer aux ouvriers qu'il emploiera les prix à l'heure que le Conseil communal, dans sa séance du 30 juin 1892, a reconnus comme minimum de salaire, et qui sont les suivants :

|                      |             |                                    |             |
|----------------------|-------------|------------------------------------|-------------|
| 1. Maçons.....       | 0 fr. 30 c. | 10. Zingneurs.....                 | 0 fr. 30 c. |
| 2. Manœuvres.....    | 0 21        | 11. Plombiers.....                 | 0 30        |
| 3. Plafonneurs.....  | 0 30        | 12. Fondeurs de fer.               | 0 30        |
| 4. Manœuvres.....    | 0 21        | 13. Peintres.....                  | 0 30        |
| 5. Couvresseurs..... | 0 30        | 14. Vitriers.....                  | 0 30        |
| 6. Manœuvres.....    | 0 21        | 15. Pavresseurs.....               | 0 30        |
| 7. Charpentiers....  | 0 30        | 16. Manœuvres.....                 | 0 30        |
| 8. Menuisiers.....   | 0 30        | 17. Terrasseurs.....               | 0 21        |
| 9. Forgerons.....    | 0 30        | 18. Tail <sup>rs</sup> de pierres. | 0 35        |

COMMUNE DE GENDBRUGGE. — *Travaux publics*. — *Minimum de salaire arrêté dans la séance du 8 décembre 1892* :

|                  |             |                       |             |
|------------------|-------------|-----------------------|-------------|
| Pavresseurs..... | 0 fr. 32 c. | Tailleurs de pierres. | 0 fr. 35 c. |
| Maçons.....      | 0 30        | Charpentiers.....     | 0 32        |
| Terrasseurs..... | 0 28        | Manœuvres-maçons.     | 0 22        |

PROVINCE DE BRABANT. — *Transformation du palais de justice et construction d'une justice de paix à Louvain* (16 août 1893). — Travaux à commencer au 1<sup>er</sup> mars 1894 :

Art. 23. — L'entrepreneur devra payer aux ouvriers et manœuvres, quel que soit leur métier, un salaire qui ne pourra être inférieur à 0 fr. 38 l'heure pour les ouvriers et à 0 fr. 22 pour les manœuvres.

L'entrepreneur devra faire placer à ses frais, à l'intérieur du chantier, un avis reproduisant textuellement cet article. L'administration provinciale aura, en tout temps, le droit de s'assurer, par tel moyen qu'il lui conviendra, de sa stricte exécution.

PROVINCE DE BRABANT. — *Construction d'une caserne de gendarmerie à Diest* (22 novembre 1893). — Travaux à commencer le 1<sup>er</sup> mars 1895. — L'article 22 du cahier des charges est identique à l'article 23 du précédent, sauf le taux du minimum de salaire : 0 fr. 35 l'heure pour les ouvriers et 0 fr. 20 pour les manœuvres.

PROVINCE DE FLANDRE OCCIDENTALE. — *Fourniture du 1<sup>er</sup> janvier 1893 au 31 décembre 1897, des impressions à l'usage de l'administration provinciale* (11 novembre 1892) :

Art. 14. — L'adjudication comportera un double barème de prix.

Le premier impliquera l'engagement de se conformer au tarif minimum des salaires, tel qu'il est précisé ci-après.

Le second ne comportera aucun engagement de l'entrepreneur quant aux salaires.

Les soumissions ne comprenant que l'un des barèmes ne seront pas recevables.

Durant la durée du contrat, l'administration se réserve le droit de décider, moyennant de prévenir l'adjudicataire trois mois à l'avance, quel barème de prix sera appliqué. Pour l'année 1893, elle préviendra l'adjudicataire avant le 20 décembre.

Aucune réclamation ni demande d'indemnité ne sera admise du chef de l'application alternative de l'un ou de l'autre barème dans les conditions stipulées ci-dessus.

En ce qui concerne le premier barème, les adjudicataires seront tenus :

1<sup>o</sup> D'indiquer, pour chacune des catégories d'ouvriers, compositeurs, imprimeurs, aides-imprimeurs, margeurs, brocheurs et cartonneurs, et garçons d'atelier, le minimum du salaire qui leur sera payé pour les ouvrages prévus au présent devis.

Le minimum du salaire sera calculé à raison d'une journée de travail de dix heures, par heure ou à la pièce. Les heures supplémentaires ainsi que le travail urgent des dimanches et des jours de fête légale seront calculés à raison d'un tiers au moins en sus.

Le minimum du salaire des apprentis par semaine sera égal à celui d'une journée de travail des compositeurs ;

2° De s'engager à payer au moins lesdits salaires *minima* pour les travaux prévus au présent devis, pendant toute la durée de l'entreprise, à moins d'une autorisation écrite de la Députation permanente;

3° D'afficher constamment et ostensiblement dans leurs ateliers le tarif minimum des salaires accepté par eux;

4° De fournir chaque mois, au greffe provincial, un tableau des ouvriers et apprentis employés dans l'atelier, avec émargement par chacun d'eux impliquant déclaration qu'il a été satisfait aux prescriptions du présent article, en ce qui les concerne.

L'administration provinciale aura en tout temps le droit de s'assurer par tous moyens qui bons lui sembleront du paiement du salaire minimum.

Art. 15. — Lors de l'adjudication, la Députation permanente se réserve :

1° D'écarter tout entrepreneur qui ne s'engagerait pas pour des salaires minima qu'elle jugerait normaux;

2° A mérites égaux de donner la préférence à l'entrepreneur dont les salaires minima seront les plus favorables à l'ouvrier;

3° De procéder à une nouvelle adjudication.

*Modèle de soumission B pour le... lot d'adjudication.*

Je, soussigné, \_\_\_\_\_, exerçant la profession d'imprimeur patenté comme tel, demeurant à Bruges, rue \_\_\_\_\_, n° \_\_\_\_\_, ayant pris connaissance suffisante des clauses et conditions du cahier des charges, approuvé le 11 novembre 1892 par la Députation permanente du Conseil provincial, et des modèles et échantillons-types déposés aux bureaux de la troisième division de l'administration provinciale, pour la fourniture des impressions qui seront nécessaires à l'administration, pendant une période de cinq années, à partir du 1<sup>er</sup> janvier 1893, m'engage par les présentes sur mes biens, meubles et immeubles, à fournir les imprimés indiqués dans la colonne 2 du tableau ci-après, et ce aux prix portés en toutes lettres et en chiffres dans les colonnes à ce destinées.

Je m'engage en outre à payer, pendant la durée de mon contrat, à mes ouvriers, pour les impressions faisant partie du 1<sup>er</sup> lot d'adjudication, comme minimum de salaire :

|                            |     |    |                                                |
|----------------------------|-----|----|------------------------------------------------|
| 1° Aux compositeurs,       | fr. | c. | la journée de dix h <sup>res</sup> de travail. |
| 2° Aux imprimeurs,         | —   | —  | —                                              |
| 3° Aux aides-imprimeurs,   | —   | —  | —                                              |
| 4° Aux margeurs,           | —   | —  | —                                              |
| 5° Aux brocheurs,          | —   | —  | —                                              |
| 6° Aux cartonners,         | —   | —  | —                                              |
| 7° Aux garçons d'ateliers, | —   | —  | —                                              |

Les heures supplémentaires ainsi que le travail urgent des dimanches et jours de fête légale seront calculés à raison d'un tiers au moins en sus de ces prix.

Le minimum du salaire de mes apprentis, par semaine, sera égal à celui d'une journée de travail des compositeurs.

PROVINCE DE FLANDRE ORIENTALE. — 1<sup>o</sup> *Travaux de repavage aux routes provinciales* (9 décembre 1893); 2<sup>o</sup> *Repavage de la cour du séminaire de Gand* (2 décembre 1893).

L'article 7 du cahier des charges de la première des deux entreprises est ainsi conçu :

Art. 7. — L'entrepreneur sera tenu de payer à ses ouvriers les salaires suivants :

- 1<sup>o</sup> Paveur, 50 centimes par heure;
- 2<sup>o</sup> Aide-paveur, 32 centimes par heure;
- 3<sup>o</sup> Terrassier, 30 centimes par heure;
- 4<sup>o</sup> Charretier, 3 fr. 50 par journée de dix heures.

Chacune des infractions aux prescriptions du présent article sera constatée par un procès-verbal que dresseront les fonctionnaires ou employés chargés de la direction ou de la surveillance des travaux, et sera punie d'une retenue de 50 francs, conformément à l'article 20 du cahier général des charges mentionné à l'article 5.

Pour assurer la constatation des contraventions, l'entrepreneur sera tenu d'ouvrir un registre spécial et d'y consigner, chaque semaine, pour les métiers dont le taux du salaire est désigné ci-dessus, les noms des ouvriers de ces métiers, et, en regard de chaque nom, le salaire effectivement payé par unité de temps; il sera obligé, en outre, d'écrire au bas de chaque page qu'il déclare sincères et véritables les chiffres y inscrits : chacune de ces déclarations sera datée et paraphée par l'entrepreneur.

L'entrepreneur devra tenir ce registre à la disposition de l'ingénieur en chef directeur ou de son délégué, ainsi que de l'ingénieur dirigeant, pendant toute la durée des travaux et jusqu'à la réception définitive de ceux-ci.

Les salaires seront payés hebdomadairement : l'entrepreneur sera tenu de faire connaître par écrit, à l'ingénieur dirigeant, les lieux, jour et heure de paye.

Le service technique provincial se réserve de prescrire à l'entrepreneur de payer les ouvriers ci-dessus indiqués devant deux témoins à désigner par l'ingénieur en chef.

FLANDRE OCCIDENTALE. — C'est aux soumissions basées sur un tarif minimum de salaire que la Députation permanente a donné la préférence (Voir *Bulletin* de mai, page 255, les conditions de la fourniture des impressions à l'usage de l'administration provinciale.)

Au cours de la session ordinaire du Conseil provincial de 1895, un des membres de cette assemblée a interpellé la Députation permanente au sujet de l'exécution du cahier des charges relatif à la fourniture des impressions pour le compte de la province.

Cet honorable conseiller faisait connaître que, d'après les bruits répandus, la clause du cahier des charges stipulant au profit des ouvriers un tarif minimum des salaires serait éludée par les patrons de diverses manières et notamment :

1° En ce que les adjudicataires consigneraient sur les états mensuels, comme travaillant pour la province, un nombre d'ouvriers moindre que le chiffre réel ;

2° En ce que les états de salaires seraient signés en blanc par les ouvriers ;

3° En ce que les patrons inscriraient sur les états mensuels, comme payés, des salaires conformes au tarif, alors qu'en réalité ils payeraient les ouvriers à un taux moindre ;

4° En ce que le tarif des salaires ne serait pas affiché dans les ateliers.

Au cours du mois d'août 1893, un des membres de la Députation permanente a procédé à une enquête au sujet de ces faits.

Les représentants des ouvriers et les patrons ont été entendus. Il est résulté de cette information que les faits articulés à la charge des patrons n'ont pas pu être établis, tout au moins qu'ils avaient été exagérés ou dénaturés.

La Députation permanente n'a toutefois pas encore statué sur le résultat de l'enquête : le dossier est entre les mains de l'un des membres du Collège chargé du rapport.

On peut affirmer, en thèse générale, que la clause nouvelle insérée dans le cahier des charges a assuré aux ouvriers un salaire suffisamment rémunérateur, et que la surveillance exercée par l'administration provinciale sur l'exécution du cahier des charges a produit de bons résultats au point de vue de la protection due aux ouvriers.

#### HOLLANDE

VILLE D'AMSTERDAM. — [En exécution de la décision du Conseil communal du 10 janvier 1894, des clauses relatives aux conditions du travail ont été insérées dans le cahier des charges des travaux communaux. Cependant le nouveau règlement n'a été voté qu'à titre d'essai, le Conseil municipal ayant décidé de demander provisoirement pour chaque devis des soumissions en double partie, c'est-à-dire avec et sans application des nouvelles clauses, en autorisant le Collège échevinal à choisir pour l'adjudication l'un ou l'autre système, suivant les circonstances.

Nous avons reçu trois cahiers des charges : n° 13, du 14 mars ; n° 15, du 24 mars ; n° 16, du 24 mars, relatifs à la *construction d'un pont, aux travaux de peinture et de tapisserie à l'extérieur et à l'intérieur des bâtiments communaux, aux travaux de revêtement des bâtiments de l'enseignement supérieur, secondaire et primaire*. Ces cahiers contiennent tous trois les clauses

votées par le Conseil ; nous prenons ces clauses dans le cahier des charges n° 13.] (1)

#### PARAGRAPHE 32

Art. 1<sup>er</sup>. — Est imposée à l'entrepreneur l'obligation de payer aux ouvriers employés à l'exécution des travaux mentionnés dans cette adjudication, au moins le salaire suivant :

A l'artisan, 0 fr. 46 par heure ;

A un manoeuvre, 0 fr. 36 par heure.

Art. 2. — On ne peut employer que 20 0/0 d'ouvriers n'ayant pas atteint l'âge de 23 ans. On ne peut admettre aucun ouvrier au-dessous de 14 ans. L'entrepreneur n'ira pas au-dessous des salaires suivants :

A un artisan et à un manoeuvre entre 14 et 16 ans, 0 fr. 10 par heure ;

A un artisan et à un manoeuvre entre 16 et 18 ans, 0 fr. 18 par heure ;

A un artisan et à un manoeuvre entre 18 et 20 ans, 0 fr. 30 par heure ;

A un artisan entre 20 et 23 ans, 0 fr. 40 par heure ;

A un manoeuvre entre 20 et 23 ans, 0 fr. 34 par heure.

Pour les ouvriers que l'entrepreneur occupe *constamment* et pour ceux qui, à cause de faiblesse ou grand âge, ne peuvent être considérés comme ouvriers valides, l'entrepreneur peut obtenir du Conseil d'aller au-dessous des minima fixés.

Art. 3. — Le paiement de salaire sera fait aux ouvriers en personne et chaque semaine, le vendredi ou avant, sur le lieu de travail ou à l'atelier où ils sont occupés ordinairement.

L'inspecteur communal doit pouvoir assister aux paiements.

Si l'ouvrier n'est pas en état de recevoir son salaire dans le lieu déterminé ci-dessus, la direction permettra une dérogation à cette règle.

Art. 4. — L'entrepreneur prendra l'engagement de ne pas faire travailler les ouvriers, employés aux travaux mentionnés dans l'adjudication, plus de onze heures par jour.

Art. 5. — Le travail au-delà de onze heures et le travail du dimanche ne peuvent se faire qu'avec le consentement de la direction. La direction ne donnera cette permission que si l'intérêt du travail l'exige avec urgence.

Art. 6. — Si la durée de travail dépasse onze heures, on payera pour le surplus de travail :

Pour la première heure, 10 0/0 du salaire journalier ;

Pour la deuxième heure, 20 0/0 ;

Pour la troisième heure, 30 0/0 ;

Pour les heures suivantes, 50 0/0.

(1) Extraits du *Bulletin de l'Office du Travail*.



Art. 7. — Si l'ouvrier travaille le dimanche, son salaire pour cette journée sera majoré de 50 0/0.

Art. 8. — La durée du repos et du travail sera réglée selon les usages locaux, la saison et la nature du travail, par l'entente de l'entrepreneur et de la direction.

Art. 9. — Il est permis à l'entrepreneur de faire travailler aux pièces.

Si cependant le travail aux pièces donne lieu, au jugement de la direction, à un travail moins soigné, à des salaires trop bas, à un labeur excessif, il peut être interdit par elle.

Art. 10. — L'entrepreneur est obligé de faire exécuter dans la commune même les travaux compris dans l'adjudication que le Conseil communal indiquera.

Art. 11. — Les mesures mentionnées ci-dessus s'appliquent également aux ouvriers employés par des sous-entrepreneurs, et l'entrepreneur reste responsable vis-à-vis de la commune de la stricte observance des stipulations.

Art. 12. — L'entrepreneur doit, chaque jour de paiement, donner à la direction connaissance par écrit des noms de chacun des ouvriers, de leur âge, s'il est inférieur à 23 ans, aussi bien de ceux qu'il emploie lui-même à l'exécution des travaux que de ceux qui sont employés par des sous-entrepreneurs. Il doit indiquer leur métier, leur salaire par heure, le salaire total de chacun, et s'ils travaillent aux pièces ou à la journée.

Art. 13. — L'entrepreneur est tenu de faire afficher un exemplaire de ces mesures au lieu de travail et veiller à ce qu'il reste affiché pendant toute la durée des travaux à l'endroit désigné par l'inspecteur communal.

Art. 14. — En cas de contravention à une ou plusieurs stipulations de ce règlement, l'ouvrier, sauf les droits résultant de son propre contrat, ne peut pas baser sur l'article 1353 du Code civil une poursuite judiciaire contre l'entrepreneur, à raison de ce que celui-ci aurait violé le contrat existant entre lui et la commune. Seule la commune peut intenter un procès de ce chef. Les ouvriers peuvent faire valoir leurs plaintes auprès du bourgmestre et des échevins.

#### PARAGRAPHE 34

Les bordereaux de soumission, sur papier timbré, doivent contenir le nom et le domicile de l'entrepreneur et ceux de ses garants, et, en toutes lettres et en chiffres, les sommes pour lesquelles il s'engage à exécuter les travaux :

1° Conformément aux dispositions de ce projet ;

2° Conformément à ces dispositions, à l'exception de celles contenues dans le paragraphe 32.

[A l'adjudication, quelques-unes des soumissions portaient les mêmes sommes totales dans les deux cas ; dans certaines autres, au contraire, les différences étaient considérables ; en moyenne,

les conditions du paragraphe 32 majoraient de 6 p. 100 les offres des entrepreneurs.]

VILLE D'ALKMAAR. — Le Conseil communal a décidé, à titre d'essai, de fixer dans les cahiers des charges le minimum de salaire pour les ouvriers et les aides et le maximum d'heures de travail (11 heures).

VILLE DE SNEEK. — (A) *Construction d'un réservoir d'eau de pluie. Cahier des charges du 3 avril 1894; adjudication du 14 avril.* (B) *Entretien et travaux courants aux édifices communaux en 1894. Cahier des charges du 27 juillet 1893.*

(A) Art. 8. — . . . . .

L'entrepreneur s'engagera à payer aux ouvriers occupés à l'exécution des travaux décrits dans le devis le salaire minimum indiqué ci-dessous :

A un charpentier, maçon, peintre ou autre artisan âgé de 20 à 60 ans, 0 fr. 32 par heure ;

A un aide ou manœuvre âgé de 20 à 60 ans, 0 fr. 24 par heure.

Pour les jeunes gens au-dessous de 20 ans, qui ne peuvent être considérés comme ayant toute leur vigueur, et pour les ouvriers de plus de 60 ans, les salaires seront réglés et établis par l'entrepreneur en délibération avec la direction.

L'entrepreneur s'engagera à ne pas faire travailler plus de onze heures par jour les ouvriers occupés dans les travaux de cette adjudication. Devront y être seuls employés les ouvriers domiciliés dans la commune depuis au moins une année.

Il est interdit à l'entrepreneur de réadjudger les travaux par fractions aux ouvriers.

(B) Art. 17. — [Mêmes stipulations générales que ci-dessus, sauf exceptions prévues aux conditions de domicile pour certains travaux.]

VILLE DE ZUTPHEN. — [On vient d'arrêter le règlement concernant la durée du travail et le salaire minimum qui seront insérés dans les cahiers des charges.]

Art. 1 et 2. — [Conformes aux règlements de la ville d'Amsterdam, *sauf pour le taux du minimum prévu* : à un artisan, 0 fr. 30 par heure ; à un manœuvre, aide, 0 fr. 22.]

Art. 3. — Lorsque, soit par force majeure, soit par la faute ou par la négligence de l'entrepreneur, les travaux seront entièrement ou partiellement interrompus, l'entrepreneur sera tenu de payer aux ouvriers, qui par suite seraient sans ouvrage, le salaire de cinq heures et demie par jour ; cette obligation prend fin après une semaine d'interruption.

Art. 4, 5, 6, 7, 8, 9 et 10. — [Même sens que les articles 3, 4, 5, 8, 9, 12 et 14 pour la ville d'Amsterdam.]

Art. 11. — Toute dérogation au présent règlement, sans autorisation de la direction, sera punie d'une amende de 6 à 50 florins, suivant l'importance de l'affaire, etc.

*Réglementation du travail dans les chantiers communaux.*

— Le Conseil municipal d'Amsterdam (500,000 habitants) a fixé pour les chantiers communaux un maximum d'heures de travail (11 heures) et un minimum de salaire suivant les âges et les métiers.

Le salaire des heures supplémentaires de semaine est majoré de 10 à 50 p. 100, celles du dimanche de 50 p. 100.

Le travail des enfants au-dessous de quatorze ans est interdit, et la proportion d'ouvriers de moins de vingt-trois ans ne doit pas dépasser 20 p. 100.

La paye doit se faire le vendredi soir, en présence d'un fonctionnaire communal, aux ouvriers et à leurs parents, jamais à des étrangers.

*Résultats financiers des conditions du travail imposées dans les travaux communaux.* — Le *Bulletin de l'Office du Travail* a reproduit les clauses relatives aux salaires minima et à la durée maxima du travail journalier insérées récemment dans les cahiers des charges de leurs travaux communaux par diverses villes de Hollande, notamment celle d'Amsterdam. Cette innovation a une importance d'autant plus sérieuse que des travaux publics considérables, notamment ceux des ports et de divers canaux, sont exécutés en Hollande pour le compte des villes.

Rappelons qu'aux termes de la nouvelle réglementation des chantiers de la ville d'Amsterdam, la durée du travail effectif ne doit pas dépasser onze heures et que le repos du dimanche est obligatoire, sauf dans les cas urgents admis par la direction des travaux de la ville.

Les entrepreneurs sont invités à présenter des soumissions portant deux prix, l'un avec et l'autre sans application des nouvelles clauses, et le Conseil municipal se réserve de retenir l'une ou l'autre proposition.

Un rapport du bourgmestre et de l'adjoint d'Amsterdam, en date du 12 juillet 1894, rend compte des adjudications de travaux publics passés pour la ville depuis l'application de ce règlement en janvier 1894; les résultats des propositions des entrepreneurs sont résumés dans le tableau ci-dessous :

| MATIÈRE DES TRAVAUX                                              | MONTANT<br>DES SOUMISSIONS<br>les plus basses<br>dans chaque cas |                                                  | MOYENNE<br>DES MONTANTS<br>de toutes<br>les soumissions<br>présentées<br>dans chaque cas |                                                  |
|------------------------------------------------------------------|------------------------------------------------------------------|--------------------------------------------------|------------------------------------------------------------------------------------------|--------------------------------------------------|
|                                                                  | avec<br>application<br>des nouvelles<br>clauses.                 | sans<br>application<br>des nouvelles<br>clauses. | avec<br>application<br>des nouvelles<br>clauses.                                         | sans<br>application<br>des nouvelles<br>clauses. |
|                                                                  | florins (1).                                                     | florins.                                         | florins.                                                                                 | florins.                                         |
| Construction d'une cale de halage pour<br>les bateaux . . . . .  | 13,190                                                           | 13,100                                           | 17,079                                                                                   | 15,767                                           |
| Prolongement d'un quai . . . . .                                 | 13,997                                                           | 13,900                                           | 15,400                                                                                   | 14,782                                           |
| Construction d'égouts et terrassements.                          | 7,268                                                            | 7,143                                            | 8,301                                                                                    | 8,162                                            |
| Construction d'un pont à bascule . . . .                         | 5,000                                                            | 5,000                                            | 6,339                                                                                    | 6,219                                            |
| Construction d'un poste de pompiers.                             | 2,640                                                            | 2,570                                            | 3,022                                                                                    | 2,903                                            |
| Entretien de murs de quai . . . . .                              | 22,800                                                           | 22,650                                           | 25,283                                                                                   | 25,028                                           |
| Entretien de divers édifices . . . . .                           | 7,136                                                            | 6,700                                            | 8,216                                                                                    | 7,441                                            |
| Dragages . . . . .                                               | 16,850                                                           | 15,050                                           | 23,360                                                                                   | 22,560                                           |
| Construction d'un marché couvert . .                             | 21,200                                                           | 21,200                                           | 23,950                                                                                   | 23,408                                           |
| Peinture de ponts . . . . .                                      | 1,920                                                            | 1,770                                            | 3,352                                                                                    | 2,183                                            |
| Exécution d'un quai . . . . .                                    | 143,500                                                          | 143,000                                          | 148,980                                                                                  | 147,192                                          |
| Entretien d'écluses et autres ouvrages<br>hydrauliques . . . . . | 69,000                                                           | 67,700                                           | 74,196                                                                                   | 73,140                                           |
| Construction d'un pavillon pour bu-<br>reaux . . . . .           | 4,698                                                            | 4,598                                            | 6,040                                                                                    | 5,894                                            |
| Construction d'une école . . . . .                               | 33,400                                                           | 32,900                                           | 37,886                                                                                   | 37,223                                           |
| TOTAUX . . . . .                                                 | 362,599                                                          | 358,081                                          | 400,404                                                                                  | 391,903                                          |

(1) Le florin hollandais vaut 2 fr. 10.

On voit combien la différence est faible entre les deux catégories de soumissions, celle qui comporte et celle qui ne comporte pas l'application des nouvelles clauses. Sur l'ensemble des soumissions présentées, cette différence est de 2,17 p. 100; sur les soumissions les plus basses, elle est seulement de 1,26 p. 100. On peut remarquer combien plus grande est, dans chaque cas, la différence entre le montant moyen des soumissions présentées et le montant des plus basses d'entre elles. Sur l'ensemble, cette différence atteint 10,5 p. 100 pour les soumissions de la première catégorie et 9,5 p. 100 pour celles de la seconde. Il semblerait permis d'en déduire que le bénéfice enlevé aux entrepreneurs par l'application de mesures qui ont une grande importance pour les ouvriers ne joue qu'un rôle secondaire auprès des autres éléments de gain ou de perte de leur entreprise. Cette opinion paraît partagée par un grand nombre d'entrepreneurs des travaux privés du bâtiment, à Amsterdam. A la suite de l'adoption

des nouvelles clauses sur les chantiers de la Ville, la plupart d'entre eux s'étaient déclarés prêts à en accepter l'application dans leurs travaux, mais seulement quand tous les concurrents seraient disposés à en faire autant. La résistance de quelques patrons ayant empêché un accord amiable de se produire, une grève générale des ouvriers a éclaté au commencement du mois d'août pour obtenir l'application des conditions de travail inaugurées par la Ville. Elle a été de courte durée et a eu un succès presque complet.

*Le nouveau règlement des ouvriers en régie de la Ville d'Amsterdam.* — La Ville d'Amsterdam vient d'adopter un nouveau règlement pour fixer les conditions du travail des nombreux ouvriers qu'elle emploie dans les diverses régies municipales. Ce règlement peut être considéré comme une conséquence des dispositions rappelées précédemment (1) et qui ont été prises en faveur des entrepreneurs municipaux. Les dispositions principales sont les suivantes :

A leur entrée au service, les ouvriers ne doivent pas être âgés de plus de 35 ans. La durée du travail effectif est de 60 heures par semaine. Le samedi, le travail finit au plus tard à 4 heures. Le dimanche, le travail est suspendu, sauf le cas de nécessité absolue; pour le travail qui se fait le dimanche, le salaire est augmenté de 50 p. 100.

En cas de maladie, l'ouvrier reçoit les trois quarts de son salaire pendant 3 mois, puis la moitié pendant 6 mois. Lorsque la maladie ne dure pas une semaine, l'ouvrier ne reçoit rien pour les premiers 3 jours.

L'ouvrier qui veut quitter le service de la Ville doit faire connaître son intention 14 jours à l'avance.

Lorsque la commune veut congédier un ouvrier, elle doit l'en avertir 4 semaines auparavant. Après ce temps, il reçoit la moitié de son salaire pendant autant de semaines qu'il a d'années de service. Les ouvriers âgés de 55 ans au jour de leur congé reçoivent en outre une pension d'au moins la moitié de la pension à laquelle ils auraient eu droit à 65 ans d'âge, d'après le règlement sur les pensions des employés et ouvriers de la commune.

Le règlement des ouvriers en régie spécifie expressément les cas qui peuvent donner lieu à un renvoi immédiat sans dédommagement ou qui peuvent motiver d'autres mesures disciplinaires.

(1) *Cl. Bulletin de l'Office du Travail* d'octobre 1894, p. 519.

Quand le Comité exécutif (le bourgmestre et les échevins) a frappé un ouvrier d'une de ces punitions, l'ouvrier peut demander que la question soit soumise à un conseil d'arbitrage de 5 membres qui est ainsi composé : 2 membres nommés par le Comité exécutif, 2 par les ouvriers et le 5<sup>e</sup> par le Conseil municipal.

Ces nouvelles dispositions seront mises en vigueur aussitôt que les règlements des différents services municipaux auront été remaniés en conséquence.

#### ITALIE

Une discussion importante a eu lieu il y a quelque temps au Conseil municipal de Milan. Le conseiller Corneo, tant en son nom qu'en celui de Gnocchi-Viani, a demandé « que le Conseil inscrive dans son cahier des charges, pour les travaux de la ville, une clause de garantie pour les travailleurs, soit que les entrepreneurs s'engagent à accorder pour lesdits travaux le tarif et la limite de la journée en vigueur dans la profession. »

A l'appui de cette clause, le conseiller Gnocchi a cité l'exemple de l'Angleterre, où de nombreuses villes ont inséré dans les cahiers des charges que « les entrepreneurs doivent accepter les tarifs des *Trade-Unions* ». Après quelques modifications, l'ordre du jour Corneo et Gnocchi a été adopté.

#### SUISSE

Les 11 et 22 juin 1892, les représentants de Zurich décidèrent que, la journée de travail étant fixée à dix heures, le salaire minimum de ce travail serait de 4 francs pour les journaliers ou hommes de peine et de 4 fr. 50 pour tout ouvrier, et que ces prix de la journée, au-dessous desquels le salaire ne pouvait descendre, seraient inscrits dans les cahiers des charges des entreprises. Il fut enfin décidé que cette résolution ferait partie intégrante de la constitution communale de Zurich.

Cette dernière décision permettait à son promoteur, le député Vogelsanger, de déclarer que, si elle était partout réclamée, Zurich pouvait être fière de l'avoir la première inscrite dans une constitution communale.

Nous avons attaché une très grande valeur à la communication de ces documents, puisés aux sources officielles. Ils constituent le plus éloquent plaidoyer en faveur de notre thèse. N'oublions pas que c'est en Angleterre surtout, le pays classique de la non-intervention de l'Etat, de la liberté du travail, que les communes et l'Etat ont donné cet exemple si probant signalé plus haut. Que

répondront à cela ceux qui ne cessent d'invoquer les ordonnances comme le personnage de Molière parlait de sa « tarte à la crème » ? Les résultats sérieux ont été obtenus sous la pression des *Trade-Unions*, qui ont dépensé une infatigable activité, moins préoccupées des rivalités d'école, mais plus soucieuses d'une action pratique, de la convergence des efforts que permet seule d'exercer l'entente, l'union de la masse ouvrière.

Un fait également significatif dans la campagne menée par les groupements ouvriers anglais, c'est la circulaire lancée, dès 1892, par la Société typographique de Londres.

Cette circulaire était adressée à tous les candidats à la Chambre des communes pour leur demander de prendre l'engagement de proposer au Gouvernement d'introduire dans les contrats pour travaux publics des clauses qui assurent le salaire fixé par les Unions syndicales. Les candidats étaient informés que seuls obtiendraient les suffrages des travailleurs ceux qui prendraient cet engagement.

Nous nous sommes appliqué à établir un parallèle instructif entre les tentatives avortées faites en France et les mesures prises à l'étranger ; nous avons fait constater, avec pièces à l'appui, à quels obstacles soi-disant légaux les municipalités et les travailleurs se sont toujours heurtés en France, quelle barrière insurmontable les ordonnances de 1836 et 1837 opposaient aux réclamations nombreuses élevées contre le mauvais système des adjudications, lorsque, autour de nous, dans des pays réputés socialement moins avancés, où dans une nation comme l'Angleterre, le berceau de l'école de Manchester, nous voyons les abus des adjudications énergiquement et légalement réprimés.

D'où vient donc, en France, cet incorrigible, cet aveugle ostracisme contre tout ce qui a un caractère protecteur des intérêts des faibles, des exploités ?

Faut-il l'attribuer à une intention systématique de ne vouloir donner aucune satisfaction à de légitimes réclamations, ou est-ce le résultat d'une aberration invétérée, d'une notion absolument fausse du rôle de l'Etat ou du législateur ? Il n'est pas téméraire de penser que les deux interprétations ont un fonds d'exactitude. En tous cas, une des causes, nous l'avons montré, est la préoccupation des intérêts des contribuables ; mais une autre cause, et qui explique la coalition de tous les patrons désireux de spéculer sur la main d'œuvre, de tous les hauts fonctionnaires, de tous les corps constitués, c'est ce dogme tyrannique de la liberté du travail, enseigné par nos économistes, au nom duquel se com-

mettent tant d'abominables abus et qui permet toutes les iniquités, l'écrasement du faible par les forts, le triomphe des individus (patrons ou ouvriers) sans foi ni loi sur ceux qui se reconnaissent des devoirs et qui font des sacrifices dans l'intérêt général. Nous voulons aussi la liberté, mais nous ne voulons pas que, sous le couvert de la liberté et de la loi, se commettent tant de méfaits et d'exploitation.

En résumé, la question qui se pose ici est nette, précise : « En présence de la situation créée aux travailleurs et à un certain nombre de patrons par les abus actuels du système des adjudications, y a-t-il lieu de faire intervenir les pouvoirs publics pour faire cesser ces abus en modifiant les ordonnances de 1836 et de 1837 ? »

— Ces modifications sont-elles du ressort du pouvoir législatif ou du pouvoir exécutif ? »

L'ensemble de ce rapport est, croyons-nous, une réponse affirmative à la première question, et tout ce que nous avons cité sur ce qui se fait à l'étranger vient, d'une manière éclatante, confirmer notre opinion.

Si nous ne craignons de donner à ce rapport une étendue démesurée et fatigante, nous reproduirions quelques passages du savant discours de M. Hector Denis, le sociologue belge si distingué, discours prononcé au Conseil provincial du Brabant, au moment de la discussion du minimum de salaire.

Il conclut à l'intervention de l'Etat dans une telle question, en se plaçant au triple point de vue économique, juridique et moral.

*Au point de vue économique*, il combat la théorie du laisser faire, du laisser passer, qui aboutit à la loi de l'offre et de la demande, par laquelle le patron capitaliste exploite la situation et abuse de l'impossibilité où se trouvent l'ouvrier et sa famille de changer de métier et de localité, malgré les chômages toujours plus fréquents. C'est là où il reconnaît le rôle nécessaire de l'organisation ouvrière contre la puissance patronale. Et ici, il faut considérer l'Etat, les départements et les communes non seulement comme les représentants des contribuables, mais aussi et surtout comme patrons.

*Au point de vue juridique*, l'administration a le droit et le devoir d'intervenir et de limiter, dans ses contrats d'entreprise, la concurrence entre les entrepreneurs. concurrence qui peut s'exercer et s'exerce aux dépens du salaire. L'administration doit agir comme un patron ou comme un *client* ayant le souci du salaire des ouvriers qui travaillent pour lui. Elle intervient à titre



de *personne civile*, à titre de cocontractante. Ici se place une considération qui est partout négligée lorsqu'il s'agit de la concurrence. Il est admis, d'une manière générale, que le patron est seul responsable de l'exploitation que subit l'ouvrier. A notre avis, cette responsabilité doit être partagée entre le patron et le *client*; ce dernier, par ses exigences, par ses caprices et l'instabilité de ses procédés, rend la situation du patron très difficile et le pousse quelquefois inconsciemment à l'exploitation de ses ouvriers.

L'Etat et les communes, devenus patrons ou clients, ne doivent pas commettre les mêmes abus, ils doivent s'inspirer des intérêts permanents des travailleurs et de la société, aussi bien qu'ils exigent la qualité et la quantité pour les travaux à fournir par les adjudicataires. Il suffit de lire les cahiers des charges pour s'apercevoir que l'administration n'hésite pas à imposer de très lourdes conditions aux soumissionnaires. Pourquoi, à ces conditions, n'ajouterait-on celles relatives au salaire des ouvriers et autres ?

Comme dernière preuve, et des plus décisives, de la possibilité pour le gouvernement de modifier les cahiers des charges en y introduisant des clauses en faveur des travailleurs, il nous suffit de citer l'interprétation qui est faite de l'article 5 des deux ordonnances de 1836-1837, dans le répertoire de législation (Dalloz), dont la jurisprudence fait autorité (1) :

« Aux termes de l'art. 5, c'est dans le *cahier des charges* que doivent se trouver *toutes* les conditions et l'étendue de l'engagement. Parmi les dispositions *principales* qu'il est d'usage de faire figurer dans le cahier des charges, nous croyons devoir indiquer les suivantes : 1° la désignation des objets à livrer, leur quantité, le lieu et les époques de leur livraison ; 2° l'obligation de ne livrer que des matières et objets de qualité reconnue bonne, loyale et marchande ; 3° l'obligation de les fournir conformément aux conditions et modèles adoptés ; 4° le prix convenu de chaque objet, au poids ou à la mesure, suivant les cas ; 5° les termes et époques de paiements, ainsi que la dénomination et la qualité de l'autorité chargée d'ordonnancer les paiements ; 6° le mode de justification de fournitures et le délai accordé sous peine de déchéance, pour la production des titres ; 7° la nature et le montant du cautionnement à fournir, et l'époque à laquelle il devra être réalisé ; la condition que, dans le cas où le traitant ne remplirait pas ses engagements dans les délais et suivant les clauses du marché, il sera pourvu au service, aux frais, risques et périls de ce traitant ; 8° l'obligation de la part du traitant de se soumettre à toutes les dispositions réglementaires en vigueur, tant pour l'exécution du service entrepris que pour la justification (V. MM. de Gérando, *Instit. dr. adm.*, et Magnitot et Delamarre, *Dict. de dr. adm.*, v° Fournitures).

(1) Dalloz (Répertoire), *Marchés des Fournitures*, p. 98, n° 19,

Cela est de toute évidence, à la nomenclature des conditions qui précèdent, il est facile d'y ajouter les conditions du travail et du salaire, et sans sortir de l'esprit qui a guidé les rédacteurs des ordonnances de 1836-1837.

Il n'y a dans l'espèce qu'une question d'interprétation, à laquelle n'ont jamais voulu se prêter les ministres qui se sont succédé, de quelque opinion qu'ils soient, et le Conseil d'Etat, organisme tout imprégné de l'implacable doctrine des économistes, a résisté plus encore aux fugitives faveurs d'un ministre bien intentionné, se rangeant toujours du côté des forts contre les faibles.

Mais si nous ne réussissons à faire admettre cette opinion que les cahiers des charges pourraient, par la seule initiative des communes et de l'Etat, contenir des clauses relatives au salaire, il y a lieu d'examiner quel chemin nous conduira au but désiré.

Est-ce le législateur qui devra imposer cette réforme au Conseil d'Etat, ou l'intervention du pouvoir exécutif, c'est-à-dire du ministre compétent, sera-t-elle suffisante pour modifier le texte des ordonnances qui font autorité?

Dans le premier cas, ce sera une tâche longue et difficile qui nous sera dévolue; il nous faudra obtenir le concours du monde parlementaire et produire un mouvement d'opinion favorable à notre cause. C'est un travail extrêmement pénible et d'un aboutissement douteux, surtout si l'action restait limitée à une seule corporation. C'est pourquoi nous estimons que tous les travailleurs, toutes les professions sont intéressées et devront intervenir auprès des membres du Parlement; nous dirons tout à l'heure de quelle façon.

Mais, malgré toutes les déclarations officielles, malgré toutes les interprétations qui ont été faites, malgré la résistance qui a été opposée à toutes les tentatives, nous avons la conviction que les ordonnances de 1836-1837 pourront être modifiées dans le sens que nous avons indiqué, avec le concours spontané, volontaire du gouvernement et du Conseil d'Etat. La preuve la plus indiscutable, c'est que l'ordonnance du 4 décembre 1836 a été abrogée et remplacée par un décret du 18 novembre 1882, et cela sans aucune intervention du Parlement.

Cette substitution d'une ordonnance concernant les travaux de l'Etat à une autre ordonnance était la conséquence de modifications importantes dans les conditions des adjudications :

Ainsi la nouvelle ordonnance réduisait la durée du délai de publicité, permettait d'introduire dans le cahier des charges une clause qui dispensait de l'obligation de déposer un cautionne-

ment provisoire ou définitif; extension des droits de l'Etat; augmentation et indication des garanties financières exigées; conditions du dépôt des soumissions; augmentation du chiffre total des travaux exécutoires de gré à gré (20,000 francs au lieu de 10,000); augmentation du nombre de cas où le gouvernement peut traiter de gré à gré; modification des conditions d'exécution des travaux qui ne seront exécutés qu'en régie, à la journée ou à la tâche; enfin une dernière disposition qui fait cesser l'effet du cahier des charges à partir de l'ordre de mobilisation.

Une mesure récente vient fortifier encore la thèse que nous soutenons avec tant de conviction : la commission du budget, à l'occasion de l'examen des crédits supplémentaires, a été amenée à s'occuper des adjudications pour les services de l'Etat.

La commission, considérant que les cahiers des charges qui régissent ces adjudications renferment les clauses rigoureuses qui empêchent les producteurs d'y concourir directement et rendent inévitable l'emploi d'intermédiaires dont l'intervention est souvent onéreuse pour l'Etat, a décidé de confier à une commission de onze membres le soin d'étudier le cahier des charges.

Cette commission examinera en quoi ces cahiers peuvent être défectueux et quelles modifications il faudrait y apporter pour que l'Etat se trouvât placé dans la situation ordinaire du commerce et pût s'approvisionner aux meilleures conditions possibles. Une sous-commission rendra compte de ses recherches à la commission, qui signalera ensuite au gouvernement les points sur lesquels il devra, à son tour, modifier le cahier des charges.

Les membres de cette sous-commission sont : MM. Boucher (des Vosges), Antonin Dubost, Krantz, Turrel, Boudenoot, Maurice Lebon, Sarrien, Pelletan, le général Iung et Cavaignac.

Cette note fait pressentir que les modifications jugées nécessaires dans l'intérêt de l'Etat seront facilement obtenues. Mais alors, cette commission, ou une autre, ne pourrait-elle pas aussi bien faire quelques ajoutés au bénéfice des ouvriers? Le devoir et l'intérêt de tous les travailleurs les obligent à intervenir auprès d'elle et de lui demander avec fermeté ces modifications. Nous n'y manquerons pas de notre côté.

Dans ces conditions, après d'aussi importantes modifications *introduites sans le concours du Parlement*, pourra-t-on nier que les ordonnances de 1836-1837 peuvent être modifiées par les mêmes procédés en y inscrivant une clause relative au cahier des charges dans lesquels seraient fixées les conditions de travail et de salaire?

Soutenir une opinion contraire serait commettre une iniquité, ce serait fermer les yeux à de criants abus, et en refusant de donner satisfaction sur ce point aux travailleurs français, ce serait montrer une coupable hostilité à des réformes facilement appliquées depuis quelques années déjà dans plusieurs nations européennes.

#### CONCLUSION

Nous voici au terme de ce long travail, résultat de laborieuses recherches ; en nous y livrant, nous n'avions pas seulement en vue les intérêts de notre industrie, mais ceux de tous les travailleurs. Cette question, comme toutes les autres, devrait-on dire, intéresse tout le prolétariat, c'est pourquoi nous espérons que les autres corporations voudront bien adopter la même tactique, bornant leur action pour la rendre plus sûre et plus utile en demandant aux pouvoirs publics :

*1° Modification des ordonnances de 1836-1882 décidant l'introduction, dans les cahiers des charges, de clauses fixant les conditions de travail et de salaire établies de concert entre les patrons et les syndicats; dans les localités ou professions où n'existent pas de syndicats, ces conditions seront établies sur la moyenne du salaire courant local.*

*2° Seront également prévues les dispositions relatives à la loi du 2 novembre 1892.*

*3° Les cahiers des charges seront communiqués aux syndicats patronaux et ouvriers qui en feront la demande; ils pourront en signaler les lacunes ou les abus et surveiller l'exécution des clauses desdits cahiers dans l'intérêt des contribuables.*

*4° Dans toutes les élections municipales, départementales, législatives, les membres de toutes les organisations ouvrières soumettront les clauses qui précèdent à l'acceptation des candidats, sans distinction d'opinion. Le refus d'accepter ces propositions dictera la conduite des travailleurs.*

*5° Ces propositions, après avoir été déposées entre les mains du pouvoir exécutif, et si elles ne sont pas prises en considération, seront l'objet d'un pétitionnement dans tout le pays, et avec le concours de tous les syndicats ouvriers, nous agirons dans le sens indiqué au 4° auprès de nos représentants politiques.*

Notre ligne de conduite est toute tracée : à tant d'autres travaux, il nous faut ajouter cette campagne et la mener avec la plus infatigable persévérance; aucune démarche, aucun effort ne nous arrêtera.

Si nous arrivons à faire cesser cette odieuse concurrence créée par le système des adjudications, si nous arrivons par notre énergique activité à arrêter l'avisement des salaires par l'exploitation des apprentis et des femmes, conséquences des conditions actuelles des contrats administratifs, nous serons récompensé de nos travaux et la corporation du Livre aura rendu un nouveau service aux travailleurs en général.

A<sup>te</sup> KEUFER,

Secrétaire général de la Fédération française,  
des Travailleurs du Livre.

---

## II. — RÉCEPTION DE M. ET M<sup>me</sup> NYSTROM ET DE M. RAPHAEL PETRUCCI

La présence simultanée à Paris de M. et de M<sup>me</sup> Nystrom, de Stockholm, et de notre confrère italien M. Raphaël Petrucci, a donné lieu à une imposante manifestation de la Société positiviste de Paris. Une réunion à laquelle assistait un grand nombre de nos coreligionnaires (ceux qui n'avaient pu venir ont exprimé leurs regrets par lettre), s'est tenue dans les salons du café Voltaire, le mercredi 24 juin, pour souhaiter la bienvenue à nos coreligionnaires étrangers.

M. le D<sup>r</sup> Delbet a rappelé, en termes élevés, les services rendus au Positivisme depuis tant d'années par M. le D<sup>r</sup> Nystrom, si bien secondé par M<sup>me</sup> Nystrom, dont la rare élévation d'esprit, les talents littéraires et le dévouement social ont si puissamment aidé son mari dans la tâche qu'il s'est imposée de faire connaître à ses compatriotes la doctrine d'Auguste Comte.

Outre une incessante propagande orale, M. le D<sup>r</sup> Nyström a traduit et composé en suédois nombre d'ouvrages positivistes et il a pu fonder, sans participation de l'Etat, un Institut ouvrier où l'enseignement est organisé d'après les préceptes d'Auguste Comte. M. le D<sup>r</sup> Delbet a remercié M. Nystrom de l'exemple fortifiant qu'il ne cesse de donner et a bu à la continuation et à la prospérité de son œuvre.

Puis, le Secrétaire de la *Revue occidentale* a présenté aux assistants M. Raphaël Petrucci qui, non content de prêter un concours précieux à cet organe du Positivisme, s'est imposé la tâche de

rallier les nombreux disciples isolés que notre Maître compte en Italie, de façon à amener la constitution de Sociétés positivistes dans les principales villes de la péninsule.

M. Hillemand a salué, en la personne de notre jeune confrère, « une force sociale naissante, mais pleine d'avenir ». Il a exprimé l'espoir que le succès couronnera ses généreux efforts, et il l'a chargé de transmettre les sentiments d'ardente sympathie et les souhaits de réussite des positivistes français à tous ceux-là qui collaborent à l'organisation du Positivisme sur la terre latine : MM. Cermenati, Colajanni, Ferri, De Marinis, De Sanctis, Sergi, Zucarelli, et tant d'autres.

« Sans doute », a ajouté M. Hillemand, « plusieurs des hommes éminents que je viens de nommer ne sont pas en parfaite communion d'idées avec nous sur toutes les questions secondaires, sur tous les points de doctrine. Mais qu'importe ! si nous sommes d'accord avec eux sur les questions fondamentales de méthode, et du moment qu'ils acceptent la discipline mentale et la discipline morale instituées par Comte sous les titres de Méthode positive *objective* et de Méthode positive *subjective*. Selon une remarque profonde du profond penseur que nous reconnaissons comme notre chef, M. Pierre Laffitte, alors que les hérésies étaient infiniment plus graves que les schismes sous le régime théologique du monothéisme — parce que portant sur des notions absolues et indémontrables, elles étaient irréductibles, — au contraire, sous le régime positiviste, les hérésies ne sont point à craindre — parce qu'elles ne sauraient porter que sur des théories dont la démonstration peut bien être présentement insuffisante, mais dont les progrès ultérieurs de l'investigation scientifique établiront irréfutablement le bien ou le mal fondé ; — les schismes seuls sont à redouter.

« Or, à ce point de vue, nous n'avons rien à appréhender de la part de confrères, s'inspirant comme nous des méthodes de Comte, poursuivant comme nous la réalisation de l'idéal qu'il a conçu, la régénération humaine et sociale par la Science et le Culte de l'Humanité.

« Buons donc aux prochains succès du Positivisme en Italie. »

M. Petrucci a répondu en ces termes :

« Messieurs,

« Il suffit de séjourner quelque temps au dehors pour voir combien les idées positivistes ont pris d'extension et pour se rendre compte du domaine qu'elles ont conquis. Je n'apporte ici que la

« nouvelle d'une œuvre naissante à laquelle des hommes, grands  
« par le savoir comme par les œuvres, se sont dévoués. M. le  
« Dr Nystrom, au contraire, représente une œuvre puissante et  
« forte. La fondation de l'Institut national ouvrier de Stockholm  
« est une vraie conquête de l'esprit positif. Mais la présence à  
« cette table d'un Suédois et d'un Italien montre la convergence  
« des efforts, la réunion en une même doctrine qui sera la doc-  
« trine de l'avenir.

« Messieurs, je bois à notre triomphe futur. »

M. Emile Corra a constaté que la réunion, à une même table, de positivistes suédois, italiens, turcs traduisait d'une façon concrète le caractère d'universalité du Positivisme.

« Les progrès de nos idées chez des nations d'un génie si différent sont une preuve manifeste que notre doctrine pourra réunir dans un avenir prochain les hommes de toutes les parties de la planète dans une morale commune, but définitif de nos efforts. »

Au nom du prolétariat français, M. Auguste Keüfer a témoigné sa reconnaissance à M. Nystrom des efforts qu'il fait pour éclairer et émanciper le prolétariat de son pays. Les obstacles qui s'opposent en France à une action plus immédiate ne doivent pas décourager les positivistes français auxquels M. Keüfer propose M. Nystrom comme un guide sûr et un modèle à imiter. M. Keüfer, suivant un usage qui nous est cher, porte, aux applaudissements de l'assemblée, la santé de M. Laffitte, en ce moment absent de Paris.

Sur l'invitation de M. Delbet, M. Petrucci, dans une causerie familière et enjouée, donne des détails intéressants sur les résultats qu'il a obtenus et sur le concours qu'il a reçu des personnalités les plus éminentes de son pays.

Enfin, M. le Dr Nystrom, après avoir remercié ses confrères français du chaleureux accueil qu'ils lui ont fait, a prononcé un éloquent discours dont nous avons pu recueillir le texte et que nous donnons ci-dessous.

Cette soirée, où s'est affirmée si heureusement l'union des positivistes de tous les pays, est un gage certain que l'œuvre de pénétration du Positivisme est en bonne voie, et c'est sur cette fortifiante impression que les assistants se sont séparés, non sans avoir envoyé à leurs confrères anglais et américains, présents à leurs cœurs, un salut fraternel.

L. M.

## DISCOURS DE M. NYSTRÖM.

Mesdames, Messieurs,

Veillez bien recevoir, de ma part et de celle de ma femme, notre reconnaissance sincère pour votre invitation obligeante à ce banquet fraternel et cordial.

Si le cœur est plein, on ne peut pas se taire ; il faut absolument parler, même en une langue étrangère qu'on parle mal.

Comme un interprète de l'opinion populaire en Suède, je veux vous dire d'abord ce qui nous tient à cœur : l'amitié sincère qui unit toujours les Suédois et les Français et le profond respect que nous avons pour le grand rôle civilisateur de la France.

Je vous dirai ensuite comment nous sommes heureux d'être parmi vous, Mesdames et Messieurs, déjà pour cette cause, que nous avons une occasion d'entendre cette belle langue française, avec ses formes logiques et rationnelles, avec sa grande clarté unie à l'élégance, cette langue qui traduit de la manière la plus complète l'esprit des Français, et qui prête au sentiment, comme à la pensée, des secours immenses.

Personne ne peut nier l'ascendant moral et intellectuel que la France a acquis dans toutes les parties du monde par son rôle brillant et séculaire dans les progrès de la civilisation et des idées.

Quiconque connaît l'influence énorme que la civilisation française a exercée sur le monde reconnaît la vérité dans la légende : que tout homme civilisé a deux patries, la sienne d'abord et ensuite la France.

Oui, la France est bien notre patrie spirituelle que nous aimons comme l'initiatrice de tout progrès civilisateur. Dominante ou vaincue, la France n'a jamais cessé, pour les esprits émancipés dans les pays scandinaves, d'être la « grande nation ». Rien n'a pu ébranler notre ferme croyance dans l'avenir de la France.

La civilisation se distingue de plus en plus par progrès scientifiques, progrès économiques, progrès de la solidarité internationale, progrès démocratiques, progrès des sentiments d'humanité.

Eh bien, Mesdames et Messieurs, quand on consulte l'histoire, on trouve que la nation française a, plus que toute autre nation, travaillé pour ces progrès, considérés comme un ensemble.

Au point de vue politique, nous trouvons que la *déclaration des droits de l'homme*, en 1790, avait établi l'égalité des citoyens devant la loi, et que la proclamation du *suffrage universel*,



en 1848, a établi l'égalité des citoyens dans le droit de participer à la confection des lois, comme à la direction des affaires publiques.

Au point de vue économique, nous trouvons que les lois modernes ont eu pour objet d'alléger le fardeau des pauvres pour le répartir, dans la mesure de l'équité, entre les citoyens riches.

L'œuvre de la Révolution qui s'est opérée pendant un siècle a été la *destruction de l'inégalité légale* d'autrefois, de mettre plus d'égalité entre les citoyens, d'établir la liberté de la presse, de réunion et d'association, de réformer l'enseignement populaire sur des bases scientifiques et solides, de remplacer un régime de privilège par un régime de droit. La Révolution a été l'exécuteur des lois du développement humain, et c'est pour cela qu'elle a réussi.

Nous ne connaissons pas une époque qui ait répandu dans le monde plus d'idées que ce grand siècle ; il n'en est pas qui ait produit de plus grandes passions ; il n'en est pas qui ait consacré avec plus d'éclat la conquête de la nature par la science.

Et cette ère fut inaugurée par nombre de grands hommes français, remarquables par leur courage, leur sagacité, leur bon sens, leur savoir, leur patriotisme.

Les descendants de ces hommes n'ont pas dégénéré. Non, Mesdames et Messieurs, tous ces efforts, toutes ces luttes, toute cette gloire et tous ces mécomptes et toutes les tombes qui ont marqué le progrès, tout cela n'a pas été perdu. Des génies philosophiques, scientifiques et politiques ont succédé et pris possession de l'héritage. Des hommes d'Etat sérieux, éclairés et fermes ont su mener les affaires publiques de la France à une fin heureuse, ils ont su établir la République sur des bases solides, ils ont ramené à la République les gens paisibles, les conservateurs de bonne foi qui ne sont pas, de parti pris, hostiles à cette forme de gouvernement et en outre des masses indécises, qui auraient pu bouleverser l'ordre actuel.

Un nombre considérable d'hommes d'Etat a travaillé, depuis la chute finale de l'Empire, pour l'établissement du gouvernement normal de la France, luttant, habilement et hardiment, d'un côté, contre les partis rétrogrades, et de l'autre, contre les révolutionnaires aveugles.

Les plus célèbres d'entre eux, Léon Gambetta, Jules Ferry, Spuller et autres, se sont approprié le grand principe du plus grand philosophe du XIX<sup>e</sup> siècle, Auguste Comte, à savoir : « Le progrès n'est que le développement de l'ordre. »

Ce qui est particulièrement digne à noter dans cette nouvelle période de la France, c'est que les hommes qui dirigent l'opinion et les affaires publiques sont, quoique parfaitement émancipés au point de vue spirituel et hostiles à la monarchie, comme au cléricalisme, c'est que ces hommes sont plus *reconstructeurs* que *démolisseurs* et que leur amour de la liberté est toujours *réglé*.

Mon opinion est que, dans l'ordre politique, contrairement à l'ordre physique, l'aurore d'un nouveau jour se montre à l'horizon de l'ouest, que c'est le soleil de la France qui nous envoie les rayons les plus lumineux et les plus vivifiants.

Que les ennemis de la France nous parlent de taches solaires et de rayons brûlants. N'importe, même si la perfection absolue n'existe pas en France, ce pays est pour nous, Scandinaves, le plus avancé, le plus civilisé ?

Qu'on me montre un pays, où le patriotisme soit plus vif, où le peuple émigre si peu qu'en France, où l'existence matérielle de toutes les classes soit mieux assurée, où les citoyens jouissent avec plus de liberté de leurs droits, où le nombre des mécontents soit plus petit ! Qu'on me montre un pays, qui a plus fait pour l'émancipation de l'esprit humain, qui a su mieux surmonter tous les obstacles à l'ordre vrai ainsi qu'au progrès réel !

Non, Mesdames et Messieurs, il n'existe pas de pays, qui soit plus avancé aux points de vue social, politique et intellectuel et qui soit mieux capable d'élaborer les bases inébranlables de l'avenir de l'Humanité !

Ce que l'avenir de l'Humanité demande, c'est, avant tout, une philosophie capable de rallier tous les esprits éclairés et tous les peuples civilisés, une philosophie sociale qui puisse clore, d'une manière définitive, la période révolutionnaire, négativiste et critique que l'Europe a traversée pendant tout un siècle.

Or, c'est à la France que revient l'honneur de nous avoir donné cette philosophie réformatrice par un de ses plus illustres fils, Auguste Comte !

Longtemps ignoré ou mal compris, ce grand penseur devient maintenant de plus en plus apprécié comme il mérite. De plus en plus ses idées font leur chemin dans tous les pays ; explicitement ou implicitement, la philosophie positive est dans l'air et nombre de personnes qui ne sont pas positivistes s'en occupent sérieusement. Même des auteurs compétents qui envisagent le Positivisme du point de vue métaphysique avouent que cette philosophie n'a cessé de faire des progrès en France, et émettent

cette opinion que l'idéalisme et le Positivisme « semblent tendre aux mêmes résultats et finiront par confluer en une représentation plus large de l'Humanité et du monde qui sera sociologique » (A. Fouillée).

De concert avec le Gouvernement, le Parlement français a créé une chaire au collège de France, confiée au chef du Positivisme, M. Pierre Laffitte.

Ce fait remarquable dénote déjà à quelle hauteur sont arrivées les opinions régnantes dans le monde politique. Plus encore, on a pu admirer les tendances philosophiques chez certains législateurs en France, en lisant la proposition au Sénat par le sénateur M. A. Lavertujon, tendant à établir, au Collège de France, une chaire de Morale positive.

Certes, l'adoption de cette proposition serait un événement à jamais mémorable. Elle montrerait que la France, avant tout autre pays en Europe, reconnaît l'impuissance de la théologie et de la métaphysique et la nécessité de fonder la morale sur des données scientifiques et de faciliter la libre éclosion des idées et rendre plus praticable la systématisation des résultats déjà acquis.

Pour, enfin, finir, Mesdames et Messieurs, j'exprime mes vœux sincères que la France, régénérée par les grands principes du Positivisme, ait un avenir calme et heureux et que vous tous, chers confrères et coreligionnaires, soyez respectés et aimés par tous les partis à cause de tant de dévouement, tant de travail pour la grande réformation positiviste, dont vous avez donné des preuves éclatantes depuis nombre d'années.

---

### III. — ALLIANCE DES SAVANTS ET DES PHILANTHROQUES DE TOUS LES PAYS

#### BRANCHE FRANÇAISE

*Procès-verbal de la séance du 30 avril 1896.*

La séance est ouverte à 9 heures du soir, dans une salle comble de la mairie de l'Opéra, sous la présidence de M. le docteur Dumontpallier, membre de l'Académie de médecine, assisté de MM. Pierre Laffitte, professeur au Collège de France; A. Eschenauer, président de la Société d'études philosophiques et sociales;

Tridon, fondateur et secrétaire général de l'Alliance ; Henri Bonnet, Savornin et Rafin, secrétaires.

Après la lecture et l'adoption du procès-verbal de la séance précédente, et le dépouillement de la correspondance, M. Tridon dit qu'un certain nombre de journaux ont annoncé la séance de ce soir, entre autres : *le Petit Journal*, *le Journal des Débats*, *l'Eclair*, *la Lanterne*, *le Radical*, *la Petite République*, *la Liberté*, *la Patrie*, etc. ; et il continue en ces termes :

« Nous avons reçu les numéros des 25 mars, 10 et 25 avril, de la *Correspondance bi-mensuelle*, l'organe du Bureau international permanent de la paix, qui siège à Berne. Ils donnent les résultats de la manifestation universelle qui a été faite, le 22 février, par les Sociétés pacifiques du monde entier en faveur du principe de l'arbitrage international. Le dernier numéro annonce que le 7<sup>e</sup> congrès universel de la Paix aura lieu à Budapest, le 15 septembre prochain et qu'un manifeste, signé par les cardinaux Gibbons, archevêque de Baltimore, Logue, primat d'Irlande, et Vaughan, archevêque de Westminster, invite l'opinion publique à réclamer l'établissement d'un tribunal permanent d'arbitrage pour éviter la guerre en Angleterre et aux Etats-Unis.

« Nous accusons réception du numéro de mars de la *Revue occidentale*, l'organe international du Positivisme. Nous y avons remarqué un important travail de M. Pierre Laffitte, chef de l'Ecole. Dans ce travail, intitulé : *Considérations générales sur l'établissement et l'évolution de la féodalité*, nous avons relevé ce passage : « La conquête d'un peuple plus nombreux par un autre « qui l'est moins et d'une civilisation moins avancée, laisse per-  
« sister les éléments principaux de la civilisation conquise, l'his-  
« toire le vérifie exactement. Un cas caractéristique est celui des  
« diverses conquêtes auxquelles la Chine a été assujettie ; chaque  
« fois les conquérants ont été absorbés. »

« Ce passage confirme pleinement ce que nous disait, dans la séance du 30 janvier, M. Léon de Rosny, sur la Chine et le bouddhisme, dont M. Frédéric Harrison, président de la Société positiviste anglaise, a fait grandement l'éloge, l'an passé, dans la *Revue occidentale* de janvier, à propos du Congrès des religions.

« Nous signalons encore à votre attention un intéressant article du *Paris*, du 30 avril. Cet article est consacré à M. Barrows, professeur à l'Université de Chicago et promoteur du Congrès des religions.

« M. Barrows, lisons-nous, a fait dernièrement dans notre capitale une conférence sur « la religion et la fraternité » empreinte d'un grand souffle de tolérance et de charité. Dans un banquet qui lui a été offert par de nombreuses notabilités, M. Barrows a porté un toast éloquent à la France.

« En saluant dans Paris, a-t-il dit, la grande cité du progrès et des lumières, il a exprimé l'espoir que le Congrès des religions tiendrait à Paris en 1900 sa seconde session. Ce sera le vieux monde s'unissant au nouveau monde pour une œuvre de concorde et d'idéal.

« Le journal ajoute : « M. Barrows se rend dans l'Inde, où les « vieux cultes brahmaniste et bouddhiste traversent en ce moment

« une évolution intéressante. L'unité religieuse de la race humaine se fait peu à peu. »

Après avoir entendu M. le Secrétaire général, M. le président donne la parole à M. Pierre Laffitte, chef du Positivisme, qui est inscrit à l'ordre du jour pour faire une conférence sur « la Morale positive. »

Il dit d'abord quelques mots sur la Chine et le bouddhisme, dont M. le secrétaire général vient de parler. Il rend hommage à la Chine, il admire Bouddha, qui, selon une légende, aurait conçu un profond amour pour l'Humanité en voyant une tigresse se donner en pâture à ses petits qui allaient mourir de faim. Il fait l'éloge du bouddhisme, mais il trouve que le Positivisme, plus rigoureux, plus scientifique, est supérieur encore au bouddhisme, qui, selon lui, pèche surtout par excès d'altruisme.

Abordant la Morale positive, le conférencier dit qu'elle recommande aux hommes d'aimer leur famille, leur patrie et l'Humanité. Il donne la définition de chacun des termes de cette trilogie. Il développe surtout la définition de la Patrie, à laquelle, le 28 novembre dernier, il est venu nous consacrer une conférence, dont *la Paix* du 2 décembre et *la Revue occidentale* du 1<sup>er</sup> janvier ont reproduit le résumé.

A l'inverse des théologiens, les positivistes considèrent la morale non comme fixe et immuable, mais comme progressive et perfectible. C'est une erreur de croire que la morale a été élaborée par une seule religion ; toutes ont contribué à l'édifier ; elle a été construite par le fétichisme, le polythéisme et le monothéisme, et aussi par la métaphysique et le militarisme.

Le fétichisme a constitué la famille, développé l'affection, enseigné la fatalité et la résignation, créé l'institution des mânes et de la tombe. La culture systématique de la vénération est due au polythéisme, et celle de l'altruisme au monothéisme, dont le défaut est l'excès de la bienfaisance et l'augmentation de l'orgueil. Les croyances déistes, en adoucissant les mœurs, ont certes fait beaucoup de bien à l'Humanité, mais elles lui ont aussi été très nuisibles ; elles sont cause que les prêtres, les conquérants, les usurpateurs, les tyrans ont fait répandre des flots de sang au nom de Dieu, dont ils se prétendaient audacieusement les interprètes.

La métaphysique a engendré la notion de conscience et la formulation et l'universalisation des préceptes de la morale.

Le militarisme a produit l'amour de la patrie, centuplé le dévouement, l'abnégation et l'esprit de sacrifice.

Contrairement aux sceptiques et aux pessimistes, les positivistes croient que l'homme devient de plus en plus sociable et moral.

Depuis la Révolution française, la morale positive a succédé, dans les relations sociales, à la morale théologique ; la première est devenue publique, et la seconde privée.

Hume a constaté qu'il existe dans l'homme des fonctions morales distinctes, toutes irréductibles par rapport aux autres. Il a vu qu'il y en a d'égoïstes et d'altruistes, et que l'on ne peut faire rentrer les unes dans les autres.

Gall a montré que nous possédons des fonctions intellectuelles et morales distinctes les unes des autres. Il a posé en principe qu'il n'y a pas de fonctions sans siège ; que, par suite, ces fonctions ont chacune un siège différent ; que ce siège est situé dans le cerveau, qui doit être considéré non comme un organe, mais comme un appareil.

Auguste Comte, grâce à la double connaissance, des mathématiques et de la sociologie, est allé plus loin que Gall dans la théorie de l'entendement humain. Malheureusement, s'il a pu concevoir le plan de son système de morale positive, la mort ne lui a pas permis de l'exécuter.

M. Pierre Laffitte, qu'Auguste Comte a choisi pour son successeur, comblera bientôt cette lacune. Il publiera prochainement l'exposé de ce système, qu'il a beaucoup médité.

*(Nombreux applaudissements.)*

M. Dumontpallier remercie et félicite vivement l'éminent chef du Positivisme de la seconde conférence si intéressante qu'il a bien voulu venir nous faire.

Vu l'heure avancée, il remet à une séance ultérieure la communication de M. Eschenauër relative à un congrès de l'Humanité en 1900. Il lève ensuite la séance à 10 heures 1/2.

*L'un des secrétaires :*

H. SAVORNIN,  
Ingénieur civil.

Nous relevons, d'autre part, dans le procès-verbal de la séance antérieure, du 26 mars, les passages suivants qui intéressent le Positivisme.

M. Tridon, Secrétaire général, accuse réception des six numéros de l'année 1895 et du numéro 1 de l'année 1896 de la *Revue occidentale*, organe international du Positivisme. Dans les numéros 1, 3, 4, de l'année passée, et 1 de l'année présente se trouve le résumé des conférences pleines d'intérêt que sont venus nous faire successivement MM. Delbet, député de Seine-et-Marne, Barbézieux, rédacteur en chef de *la Paix*, Hillemand, secrétaire de ladite *Revue*, et Pierre Laffitte, directeur de l'Ecole positiviste.

Dans le premier de ces numéros, il y a une importante appréciation du bouddhisme formulée par M. Frédéric Harrison, le chef de l'Ecole positiviste anglaise. Voici cette appréciation, qui, quoique émanant d'un nom bouddhiste, vient confirmer, en majeure partie, celle qu'en a faite M. Léon de Rosny, dans notre avant-dernière séance : « Aucune théologie, dans son essence, ne possède la beauté morale, la tendresse, la douceur aimante du bouddhisme. Comme l'a dit M. Carey Holl dans notre nouveau calendrier : « Il

« découle d'une source d'idées plus élevée que le monothéisme de Moïse et de Mahomet. » Cela, les savants européens l'ont depuis longtemps reconnu. Mais le grand fait du récent Congrès des religions a été la supériorité du mysticisme spirituel de l'Inde sur tous les types du mysticisme chrétien, pour la force, la pureté et l'adaptation naturelle à la vie des peuples qu'il inspire. Maintenant, partout le christianisme tend rapidement à se débarrasser de son dogme, de ses institutions, de ses formes traditionnelles, et à garder l'idéal primitif de sa religion. Ce Congrès mène à la conclusion évidente d'une semblable tendance, laquelle doit avoir fait bien du chemin pour qu'une pareille réunion ait seulement été possible. Le bouddhisme épuré, par suite, est évidemment le terme vers lequel tend le christianisme épuré. » (*Revue occidentale* du 1<sup>er</sup> janvier 1895.)

Dans le même numéro, le docteur Bridges rappelle que la grande conception d'Auguste Comte était l'alliance religieuse des positivistes avec les théologiens sincères de toutes les croyances. M. Tridon croit comme M. Laffitte, à la possibilité d'une pareille union, mais ésotériquement et non exotériquement, et il y croit d'autant plus que l'alliance scientifique des cultes et des grands systèmes philosophiques a toujours existé ésotériquement dans l'antiquité. Il est même convaincu que les premières religions qui entreraient dans cette alliance ésotérique seraient les religions et philosophies asiatiques, à commencer par le bouddhisme orthodoxe.

---

# BULLETIN D'ITALIE

---

## STATUTS DE LA SOCIÉTÉ POSITIVISTE ITALIENNE

Art. 1<sup>er</sup>. — Il est constitué à Rome une Société qui a pour but la culture, le développement et la vulgarisation des doctrines positives ; elle prend le nom de « Société Positiviste ».

Art. 2. — La diffusion des doctrines positives a pour but d'élever au moyen de la culture le sentiment de l'individualité humaine, de développer celui de la solidarité, de rendre plus aisée l'évolution sociale ainsi que la moralité individuelle ou sociale qui en est la conséquence.

Art. 3. — Les moyens pour la diffusion des doctrines positives sont :

(a) Des conférences dans un but de culture scientifique, philosophique et artistique ;

(b) Des écoles afin de développer l'intelligence et la préparer à une culture supérieure ;

(c) Des publications.

Art. 4. — Peuvent faire partie de la Société des personnes des deux sexes.

Art. 5. — La Société est dirigée par un conseil composé de neuf personnes, y compris un Directeur.

Art. 6. — Il y aura un directeur élu par la Société ; un vice-directeur, un secrétaire, un trésorier et cinq conseillers sans charges spéciales seront élus par la Société, ils se distribueront eux-mêmes les charges.

Art. 7. — Le directeur est nommé pour deux ans, les autres conseillers seront renouvelés par moitié chaque année.

Art. 8. — Le conseil est chargé de l'administration et de la propagande sociale qui se fait au moyen de conférences, leçons et publications.

Art. 9. — Pour faire partie de la Société il faut faire une demande verbale ou écrite.



Art. 10. — La direction décide des admissions.

Art. 11. — Il y a une seule catégorie de sociétaires.

Art. 12. — Les sociétaires paieront un minimum de taxe annuelle de 6 francs. On acceptera au-delà des dons soit annuels, soit spéciaux.

Art. 13. — Avec les fonds de la Société sera instituée une bibliothèque populaire avec une salle de lecture.

Art. 14. — La Société aura deux assemblées générales par an, l'une en janvier pour l'approbation des comptes, et le renouvellement des charges, l'autre en novembre pour établir les programmes des cours et des conférences.

Art. 15. — Pour développer la préoccupation du but social, et pour maintenir vivant le sentiment de la Société, le conseil se réunira chaque quinzaine excepté pendant les mois de juillet, août et septembre. A ces réunions peuvent intervenir tous les sociétaires. Sans avoir droit de vote, ils pourront présenter les propositions qu'ils croiront utiles à la Société et à son développement.

Art. 16. — Pour les sociétaires absents, la votation se fera par écrit en bulletins fermés, adressés au Conseil.

Art. 17. — Le conseil est chargé de constituer des Sociétés Positivistes dans les principales villes de l'Italie.

Art. 18. — Les présents statuts peuvent être modifiés, si cela est nécessaire, et si dix sociétaires au moins formulent une demande en ce sens. Les modifications introduites, pour être valides, doivent être approuvées dans une réunion générale où sera présent au moins un quart des membres de la Société.

Discuté à Rome et approuvé par les membres fondateurs le 27 mai 1896.

*Pour le comité :* Docteur CERMENATI.

Professeur SCIAMANA.

Professeur DE SANCTIS.

Professeur SERGI.

L'on verra par les présents statuts que le but que se propose la Société Positiviste Italienne est immédiatement et directement un but social. En face de ce grand problème qui se pose avec une intensité redoutable devant la pensée moderne, songer à des discussions dogmatiques entraînerait la division et le désordre dans de généreux efforts, alors qu'ils doivent au contraire s'ordonner et converger vers un même but général, afin d'être à la

hauteur d'une tâche que ce moment de la vie de l'Humanité nous impose.

En Italie, nous assistons à une enrégimentation chaque jour plus puissante de l'élément populaire dans l'organisation cléricale ; puisque l'on a été assez coupable pour négliger la constitution formelle et définitive d'un peuple qui avait glorieusement conquis avec son indépendance le droit d'exister, puisque l'instruction, cette base du devoir social, n'a pas eu le développement qu'elle aurait dû avoir, il nous appartenait à nous, Positivistes, de nous mettre d'accord sur une doctrine générale et de régler nos efforts. Ce qui n'a pas été fait, nous tenterons de le faire, et l'on peut prévoir combien puissant mentalement sera ce peuple dont l'éducation individuelle et sociale aura été faite par des Positivistes.

La présence dans la Société Italienne, en plus des noms déjà cités, de M. Enrico de Marinis, professeur à l'Université de Naples et député, de M. Enrico Ferri, professeur à l'Université de Rome et député, du député Colajanni, du professeur Zucarrelli, et de tant d'autres encore nous montre combien les esprits les plus élevés de l'Italie moderne savent comprendre leur devoir, et nous fait bien augurer de l'avenir.

Sans doute, les Positivistes français ne doivent considérer dans la Société Positiviste Italienne qu'une Société Positiviste Libre, mais la conformité des vues avec les Sociétés Française, Anglaise, Suédoise et Américaine est complète quant aux méthodes fondamentales et quant à un but général. Des divergences de vues assez importantes pourront se produire ; elles ne porteront jamais que sur des points secondaires. Au moins, dans la générosité de l'effort total, pouvons-nous voir se manifester en Europe un puissant courant qui semble peu à peu amener tous les esprits élevés de toutes les classes sociales aux doctrines, partout triomphantes, du Positivisme.

R. P.

---

# VARIÉTÉS

---

## LE CALIFE ET SES DEVOIRS

L'Orient demeure pour l'Occident le pays des mystères. Tout ce qu'on rapporte sur le *harem* et le *sérail* doit avoir un caractère mystérieux et voilé comme les souvenirs des *Mille et une nuits*.

L'homme est naturellement porté à se laisser séduire par l'inconnu.

Le sultan apparaît aux Occidentaux comme un être revêtu de la toute puissance, maître absolu de la vie et des biens de ses sujets, comme une sorte de dictateur romain investi d'une autorité sans bornes.

De cette fausse conception le sultan est seul à profiter.

Nous allons montrer l'origine du Califat, c'est-à-dire du pouvoir spirituel et temporel qui appartient au successeur de Mahomet et exposer la vraie tradition que le calife a le devoir d'observer.

Mahomet n'a pas désigné de successeur, il a laissé ses pouvoirs *au plus digne des croyants*.

Le calife était en principe un dictateur librement élu, revêtu du pouvoir absolu, mais responsable de ses actes devant le peuple.

C'est la confiance et le consentement de la nation qui, plus tard, ont fait du sultanat et du califat un régime héréditaire.

Néanmoins, aujourd'hui encore, lorsqu'un nouveau sultan est investi du souverain pouvoir, il lui faut la consécration du peuple, consécration qui a lieu sous la forme d'une cérémonie appelée *bidt*.

Le gouvernement islamique était donc présidé par un mo-

narque électif, limité dans l'exercice de son pouvoir par des prescriptions religieuses.

D'après la loi musulmane, si le calife ne se conforme pas à ces prescriptions, le corps des savants (Uléma) est armé contre lui du droit de remontrance et peut même le déposer. Parmi ces prescriptions, il en est une qui impose comme devoir absolu au calife de ne faire aucun acte, ni de prendre aucune résolution sans avoir, au préalable, demandé l'avis des chefs de tribus et des docteurs de la science, base bien caractéristique d'un gouvernement représentatif. D'après la même loi, le calife doit être juste, respecter la liberté du peuple, aimer ses sujets, s'occuper de leurs besoins et écouter leurs plaintes.

Toutes prétentions orgueilleuses lui sont interdites : ses manières doivent être fraternelles, son devoir est d'être accessible à tous.

L'Islamisme n'a pas de caste, mais ses savants ont eu durant plusieurs siècles une puissance spirituelle considérable et très salutaire. Sans intervenir directement dans la gestion des affaires publiques, leurs conseils et leurs lumières réglaient les destinées du monde musulman. Mahomet lui-même les consulta. On avait réalisé ainsi ce que Frédéric le Grand conseillait onze siècles plus tard : « Voulez-vous, disait-il, apprendre à contenter tout le monde à peu de frais, voici le secret : qu'il soit permis à tous vos sujets de vous écrire directement et de vous parler (1). »

La mosquée n'est pas seulement un lieu de prières, elle est, comme son nom *djami* l'indique, un centre d'attractions et de réunions. Djami reliait, en effet, les individus isolés, et multipliait les forces de l'Islam en les groupant. Au coucher du soleil, un grand silence descend avec la nuit sur les cités de l'Orient, tout bruit s'éteint et l'on n'entend plus que la voix chantante du Muezzin, qui appelle les croyants à leurs devoirs religieux. Ablutions et prières ne sont que des purifications symboliques du corps et de l'esprit devant préparer à un office plus noble et plus civique, c'est-à-dire à la délibération

(1) Frédéric II, *l'Art de régner*.

publique (Mechveret) sur les affaires du pays. La cérémonie du *Sélamlick*, ou visite du sultan en grande pompe à la mosquée tous les vendredis, est un spectacle qui attire et amuse particulièrement les étrangers de passage à Constantinople.

Or cette cérémonie qui se termine aujourd'hui au seuil de la mosquée se continuait autrefois plus majestueuse et plus imposante encore dans l'intérieur même du sanctuaire. Là le Commandeur des croyants, après avoir présidé à la prière et serré les mains de ses coreligionnaires, rendait compte à l'assemblée des actes les plus importants de son gouvernement.

Cette belle institution permettait à tous les grands personnages de l'Empire de prendre part aux délibérations et d'exercer une influence sur la marche des affaires.

Monarque et simples particuliers ayant une foi commune travaillaient ensemble dans un intérêt commun : l'Islamisme fournissait la direction et le lien.

Le but que tous poursuivaient était la recherche de la vérité et de la justice. L'individu, quelle que fût sa position sociale, s'initiait ainsi à l'art d'administrer et c'est de cette école que sont sortis les grands hommes auxquels on doit tant de progrès sérieux.

Depuis que le gouvernement a méconnu leur valeur et leur service, la décadence a commencé en Orient.

Le musulman, n'étant point soumis à un clergé dominateur, ne connaît ni rang, ni grade. « L'excellence dans le savoir est la plus haute distinction honorifique », disait Ali, 4<sup>e</sup> calife.

De là, moins de compétitions personnelles et de brigues; de là aussi un sentiment de respect et de vénération pour les savants; de là enfin cette simplicité de mœurs et cette sobriété qu'on remarquait chez les musulmans. « L'instruction, disait encore Ali, est le plus bel ornement d'un homme ». De toutes ces vertus, le calife était le premier à donner l'exemple.

Lorsque Abou Bekr proposa à Omar d'être son successeur : « Je n'ai pas besoin de cette dignité », répondit Omar; « mais c'est la dignité qui a besoin de vous, » répliqua Abou Bekr. Est-il une vanité plus détestable et plus puérile que celle de

ces prétendus grands qui ne voient la grandeur que dans d'indignes privilèges que le despotisme ou le préjugé leur accordent ? Qui aurait ambitionné le titre de sultan lorsque de simples particuliers pouvaient rendre par leur valeur autant de services qu'un monarque ?

Le même Omar jugeait un jour le procès intenté par un juif contre Ali. En s'adressant à ce dernier, il le désigna par son titre de famille et Ali parut contrarié et mal à l'aise. Après la séance, Omar lui demanda la raison de cette mauvaise humeur : « Est-ce, lui dit-il, parce que vous étiez au même rang qu'un pauvre juif ? — Oh ! non, au contraire, répondit Ali. J'étais contrarié d'être désigné par mon titre de famille, alors que nous devons tous être égaux devant la loi et la justice ». C'est grâce à la justice et au partage égal des biens conquis que les premiers califes ont mis leurs sujets à l'abri de l'oppression et de la misère. En assurant l'aisance, et l'indépendance des individus, ils ont fondé la prospérité de l'Islam. La civilisation arabe n'était que la somme des progrès individuels. Les califes honoraient et récompensaient la vertu et le travail ; ils ne voulaient eux-mêmes devoir leur subsistance qu'au produit de leurs propres mains.

La pauvreté est ma gloire, disait Mahomet. Abou Bekr était si désintéressé qu'à sa mort on a trouvé chez lui ce qui était strictement nécessaire à un modeste ménage. Omar, Ali, qui dominaient sur plus de cent millions d'hommes et qui possédaient les trésors de l'Orient, vivaient de leur propre travail. On raconte qu'Ali s'occupait une nuit des affaires du pays lorsqu'un ami vint lui rendre visite. Ali éteignit de suite la lampe disant que cette lampe appartenait au trésor public et qu'il n'avait pas le droit de l'employer pour une affaire personnelle.

Leur esprit de sacrifice, leur dévouement étaient énormes. La politique, pour eux, n'était pas l'art de duper le peuple. Omar, après avoir administré dans la journée les affaires de son empire, sans cesse grandissant, se promenait la nuit dans les rues, faisant lui-même la garde de la ville et assurant la paix et la tranquillité des citoyens.

La capitale du calife brillait autrefois comme un puissant

foyer de lumière. Bagdad était remplie de savants et de lettrés. Mais, à mesure que la domination musulmane s'étendit, le pouvoir se subdivisa et perdit sa force.

Il y eut à la fois trois califes, l'un à Bagdad, l'autre à Cordoue et le dernier au Caire, qui se foudroyaient réciproquement de leurs anathèmes.

Les querelles de religions, les guerres sanglantes entre les musulmans sunnis (orthodoxe) et les musulmans chiïes (hérétique), préparèrent d'un autre côté la ruine du Califat. Sept ou huit siècles après Mahomet ils n'étaient plus que chefs de la religion tel qu'est aujourd'hui le pape, et avaient presque perdu toute puissance temporelle lorsque le sultan Selim I<sup>er</sup>, après la conquête de l'Egypte en 1516, prit, avec les reliques sacrées, le titre de calife.

Il ne faut donc pas attribuer à un système ce qui tient aux vices particuliers des califes qui n'appliquaient plus ni en fait, ni en esprit, les grands principes auxquels ils devaient l'empire.

Le progrès de l'esprit humain est une chaîne continue. Mahomet et ses dignes successeurs avaient le sentiment de cette continuité quand ils respectaient les progrès accomplis par leurs devanciers. Le droit romain, la science grecque poursuivaient leur évolution chez les Arabes. Depuis qu'on a rompu ces liens nécessaires qui nous rattachent au passé et qui nous guident vers l'avenir, on a complètement enrayé la marche du progrès. Les califes ne sont pas les seuls coupables de cette décadence, le peuple en a aussi sa part. C'est un devoir sacré, une obligation religieuse pour tous les musulmans d'arrêter la main criminelle d'un calife, de lui rappeler ses devoirs et de lui demander compte de ses actes. « Celui qui voit le mal, dit Mahomet, et ne l'arrête pas est damné. » Le silence dans ce cas est également un péché. « La meilleure des guerres saintes, disait encore Mahomet, est la juste parole qu'on adresse au monarque qui exerce la tyrannie. » Il n'y a pas de maître dans l'Islam ; le chef des croyants n'est que le serviteur élu du peuple. On n'adorait pas le calife, on ne lui baisait pas les pieds comme on fait au pape. L'obéissance à un chef est réglée, est fondée sur cette présomption

que celui auquel on obéit commande au nom de la loi, et dans l'intérêt de celui qui obéit. « Respecter celui qui fait le mal, disait Mahomet, c'est travailler à la ruine de la religion. » Obéissez-moi, disait Abou Bekr, tant que je continuerai dans les bons exercices. Si je me trompe, avertissez-moi. Dans le cas contraire vous serez responsable. » Aux mêmes conseils d'Omar, un vaillant arabe répondait :

« Lorsque la nécessité se présentera nous n'attendrons pas votre avertissement. »

Le gouvernement islamique est un pouvoir de collectivité où tout citoyen libre et jouissant de ses facultés mentales est lié à la destinée commune et y a sa part de responsabilité. C'est cette responsabilité de chacun qui a fait la grandeur et la gloire de la nation.

L'Islamisme ne se préoccupe pas seulement des intérêts suprâ-terrestres, il ne dit pas : Laissez à César ce qui appartient à César, mais il enseigne à ses adeptes qu'ils ont un devoir civique à remplir ici-bas et notamment celui de contrôler la conduite de César.

Ahmed RIZA.

---

## BEETHOVEN

### ET SES TROIS STYLES

La musique de ce maître si puissant et si passionné est toute différente de celle que nous voyons se produire aujourd'hui.

Nous vivons en ce moment dans une période relativement calme, et l'art actuel doit forcément se ressentir de cette sorte de tranquillité apparente ; mais il n'en était pas de même à l'époque où vécut Beethoven et aucune autre ne fut, je pense, ni aussi tragique ni aussi mouvementée. Né en 1770, il est mort en 1827. Il a donc vu la fin du XVIII<sup>e</sup> siècle, la



Révolution française et le premier Empire ; de là les diverses tendances de son esprit, les divers styles de son œuvre, ce que l'on a appelé les trois manières de Beethoven.

Au début, il imite franchement Mozart, il le continue ; son inspiration aimable, pleine de fraîcheur et de limpidité est en tout semblable à celle du maître de Salzbourg à qui nous devons une adaptation lyrique du *Don Juan*, de Molière, celle du *Figaro* de Beaumarchais et qui a si merveilleusement incarné dans son œuvre musicale l'esprit philosophique, lumineux, tendre, pondéré, particulièrement propre au XVIII<sup>e</sup> siècle.

Mais les terribles événements politiques qui surgirent brusquement presque au début de notre siècle devaient avoir une influence énorme sur Beethoven. A ce moment, sa véritable personnalité se dégage, sa nature ardente et emportée se dévoile, sa grande âme se dilate et se répand en flots impétueux. Les formidables commotions produites par l'effervescence populaire réveillent en lui le révolutionnaire endormi ; la perruque poudrée et les talons rouges sont rejetés bien loin, son œuvre prend, dès lors, ce caractère âpre, emporté, fougueux que nous y rencontrons si souvent. Après les bergeries, viennent le tumulte des foules, les cris exaspérés, les passions déchaînées et aussi les aspirations vers un idéal sublime. C'est dans l'expression de ces sentiments violents, énergiques et radieux qu'il s'est montré incomparable, c'est-là que se retrouvent le mieux sa personnalité propre et l'originalité de sa seconde manière.

On conçoit aisément que de pareilles tempêtes ne puissent se prolonger indéfiniment ; après ces affreux bouleversements, un certain calme semblait vouloir régner de nouveau dans les esprits, le monde épuisé par un semblable effort aspirait au repos, l'Empire mit fin au tumulte révolutionnaire.

Beethoven put alors se recueillir. Encore tout imprégné des dramatiques événements qui s'étaient déroulés sous ses yeux, frappé, d'autre part, d'une surdité à peu près complète qui le séparait du monde réel, son esprit éminemment philosophique put s'élever, put prendre son vol jusqu'à des sommets encore inconnus et inaccessibles. Son âme doublement repliée sur elle-même s'enferma dans la contemplation

mystique d'un monde supérieur, fait de grandeur morale, de noble résignation et de sérénité majestueuse.

Tels sont, en effet, les sentiments admirables et toujours si profondément humains qui se trouvent exprimés dans les dernières œuvres du maître, dans ces pages si éloquantes qui demeureront comme l'éternel modèle des plus hautes spéculations morales où puissent jamais atteindre les nobles élans de notre nature tout entière.

A.-M. AUZENDE.

*(Fragment d'un discours prononcé le 14 juin 1896.)*

---

# BIBLIOGRAPHIE

---

TRADUCTION SUÉDOISE

PAR

**Madame Louise NYSTRÖM**

**Et M. Constantin BILLEBORQ, ingénieur**

DU

## DISCOURS PRÉLIMINAIRE SUR L'ENSEMBLE DU POSITIVISME

### PRÉFACE DU D<sup>r</sup> NYSTRÖM

Après avoir terminé son grand ouvrage préparatoire, *le Cours de Philosophie positive*, dont les principes fondamentaux furent reproduits dans son *Discours sur l'Esprit positif* (traduit en suédois), Auguste Comte s'occupa de poser les bases de sa sociologie, but permanent de ses spéculations philosophiques. Lorsqu'il avait traité de la sociologie dans l'œuvre ci-dessus mentionnée il s'était occupé principalement de sa partie dynamique, c'est-à-dire des lois du *développement* de l'Humanité, et il avait montré que le cours des destinées humaines est soumis à des lois constantes, alors qu'auparavant on n'y avait vu qu'une suite inexplicable de changements presque arbitraires.

Déjà, au début de sa carrière philosophique, Auguste Comte avait montré que la sociologie était le but de ses spéculations et de ses investigations, et tout le monde est depuis tombé d'accord pour reconnaître en lui le fondateur de cette science. Dès cette époque, il disait que la politique doit et peut être dorénavant une science positive susceptible d'être traitée de la même manière que les autres sciences, et il proclamait que par elle seulement on pourrait clore la période révolutionnaire, vu que tous les esprits pourraient converger désormais grâce à une doctrine impliquant l'unité mentale. Mais avant que la socio-

logie pût être développée d'une manière systématique, il fallait traiter philosophiquement toutes les autres sciences. C'est pour cela qu'Auguste Comte conçut le plan de sa philosophie positive qui, outre le développement général de l'Humanité, contient la philosophie des sciences naturelles. Il était nécessaire que la philosophie sociale s'y appuyât pour avoir son vrai caractère et aussi une autorité suffisante.

La remarquable année révolutionnaire 1848, Comte publia le premier aperçu de sa sociologie, *Discours préliminaire sur l'ensemble du Positivisme*. Ce travail, maintenant publié en suédois, est, selon mon opinion et celle de nombre d'autres positivistes, le résumé de l'ensemble du Positivisme le plus admirable que Comte ait produit. C'est sa première œuvre fondamentale, écrite directement pour la régénération de la société : elle contient l'essentiel ou les grands principes de son système politique et religieux, mais relativement peu de ces détails qui, postérieurement ajoutés, se sont montrés quelquefois moins importants, et étant quelquefois trop subjectifs ils ont trouvé de l'opposition et ont été l'objet de critiques assez sévères (même parmi les positivistes). Il est pourtant parfaitement faux de présenter, comme certains adversaires l'ont fait, la *Politique positive* d'Auguste Comte, ou sa doctrine sociale et religieuse, comme une construction purement subjective et une déviation de sa *Philosophie positive*, celle-ci étant une œuvre objective et analytique, vu que sa politique s'appuie tout à fait sur sa philosophie et sur des études empiriques de la vie humaine, individuelle et collective, du passé et du présent.

Mais il est dans la nature des choses que la méthode objective doit être exclusivement appliquée dans la philosophie analytique des sciences naturelles et l'histoire du développement, où l'investigateur monte du monde à l'homme, tandis que la méthode subjective doit être suivie dans ses parties essentielles, quand il s'agit de synthèse ou de constructions sociales, où l'on a à considérer l'homme exclusivement, ses besoins et ses sentiments intérieurs, les conditions d'existence et le but des sociétés humaines.

Ici le penseur doit, ainsi que l'homme d'État et le moraliste, avoir en vue non seulement le présent, mais aussi les générations futures, et aussi les qualités et les fonctions de la nature morale. Or, tout cela ne peut être démontré par la seule méthode objective, mais demande une intelligence créatrice qui prévoit et juge d'après des sentiments et des expériences personnelles, subjectives, et qui fait appel à de tels sentiments et expériences.

Cependant ce qu'on doit demander, c'est que cette subjectivité soit, là où il est possible, basée sur des observations objectives et sur la réalité vraie, pour qu'elle ne mène à une construction arbitraire et fantastique.

Telle n'est pas assurément la *Politique positive* d'Auguste Comte, vue comme totalité, et l'ouvrage suivant en est une preuve. Certes, il n'a pas été écrit comme une spéculation purement théorique, mais avec le but de favoriser un développement normal et un ordre normal des sociétés, c'est-à-dire pour constituer une philosophie réellement *pratique*.

Personne — quelle que soit la politique ou la religion que l'on embrasse — ne pourra lire cet ouvrage de génie sans en puiser des lumières et de l'édification, ou devenir en plusieurs sens un homme meilleur et plus utile, vu qu'il unit à une explication analytique pénétrante des conditions humaines les plus essentielles l'éthique la plus élevée pour guider la vie collective aussi bien que la conduite personnelle.

Si les opinions émises dans cet ouvrage avaient été suffisamment connues et suivies, on aurait évité une masse énorme de déviations et de méprises qui ont eu lieu depuis le milieu de notre siècle, dans la politique internationale, dans le traitement des questions sociales, de l'enseignement général, des conditions cléricales, etc.

Que les esprits éveillés et actifs veuillent enfin étudier attentivement cet ouvrage et en faire des applications pratiques ! Alors, sans aucun doute, les sociétés et les individus marcheront vers un avenir incomparablement plus heureux que le présent, un avenir marqué du concours harmonique entre l'intelligence et le cœur, et entre les hommes et les femmes, et des sentiments sympathiques qui par une sociabilité vraie uniront les différentes classes de la société !

## II. — PUBLICATIONS DU D<sup>r</sup> JABELY <sup>(1)</sup>

M. le D<sup>r</sup> Jabely, dont on connaît le dévouement infatigable à notre cause, a eu l'heureuse idée de réunir et d'éditer en deux fascicules à 0 fr. 20 c. : d'une part, divers articles publiés par M. Momenheim, sur *le Positivisme et l'Opinion publique*, et, d'autre

(1) Distribution gratuite par le D<sup>r</sup> Jabely.

En vente au bénéfice du fonds typographique positiviste, aux bureaux de la *Revue Occidentale*, 10, rue Monsieur-le-Prince, Paris. — Prix : 0 fr. 20 centimes.

part, les discours prononcés lors de la commémoration de la mort d'Auguste Comte, le 5 septembre 1894.

Nous reproduisons les préfaces dont notre confrère a fait précéder chacune de ces publications :

## 1° LE POSITIVISME ET L'OPINION PUBLIQUE

*Dans l'histoire des religions, il n'y a que les premières années qui soient difficiles à traverser. Une fois qu'une croyance a résisté aux dures épreuves qui accueillent toute fondation nouvelle, son avenir est assuré.*

Renan, *les Apôtres*, p. 261.

*Qu'on en soit le partisan ou l'adversaire, il est, à chaque époque, des doctrines dont la connaissance s'impose à tous les esprits cultivés. Tel fut au XVII<sup>e</sup> siècle le Cartésianisme : tel est au XIX<sup>e</sup> le Positivisme. A son égard, la lutte se comprend, les dissidences s'expliquent, l'ignorance ne se conçoit plus.*

*Revue philosophique*, 1881, II, 542.

L'un des signes les plus frappants de la pénétration du Positivisme dans le monde occidental européen est l'apparition en Allemagne d'un livre du révérend père Grüber, de la société de Jésus, sur « *Auguste Comte, sa vie, sa doctrine.* » Ce livre n'a pas tardé à être suivi d'un second : « *Le Positivisme, depuis Comte jusqu'à nos jours.* » Ces deux volumes constituent une étude consciencieuse et très documentée des travaux de Comte et de son école. Leur publication est un véritable événement philosophique et littéraire. Ils ont été traduits en français par M. l'abbé Mazoyer, du clergé de Paris, et publiés chez Lethielleux, 10, rue Cassette, à Paris, le premier avec une élégante préface de M. Ollé-Laprune, maître de conférences à l'Ecole normale.

Naturellement, l'appréciation de l'œuvre de Comte par ces deux auteurs ne va pas sans quelques critiques, d'ailleurs modérées dans la forme et de bonne guerre. Certains éloges, telle est la sincérité du travail, n'y manquent même pas : « Auguste Comte a mis à son œuvre, dit le P. Grüber, un sérieux, un dévouement, une sincérité qu'on n'est pas habitué à retrouver dans le camp des libres-penseurs ». — « C'est un grand effort de spéculation tendant à la pratique, dit M. Ollé-Laprune, c'est un grand mouvement de pensée agissante et pratique que nous retrouvons dans le système de Comte ». — « Avec l'unité de pensée en apparaît aussi la puissance et l'on se dit en achevant le volume que c'est une philosophie d'une singulière importance et d'un singulier intérêt que celle dont Auguste Comte est le fondateur ». — « La méthode positive employée où elle convient est bonne ; l'ambition

de pacifier les intelligences et d'imprimer à nos sociétés modernes un nouvel élan est bonne. Cela c'est dans le Positivisme ce qu'il y a de salubre, de fécond ; cela est conforme à ce qu'on pourrait nommer les tendances principales et les idées impératrices de ce siècle. C'est cela qui soutient, qui anime en beaucoup d'endroits Comte et ses disciples ; c'est ce qui leur fait penser à dire des choses excellentes. »

Quant aux critiques, nous ne pouvons, dans le cadre si restreint de cette préface, répondre à toutes. Nous retiendrons la principale : « *l'œuvre ne se fait pas*. — Voilà un grand effort d'un esprit puissant et sincère pour édifier une philosophie complète, spéculative et pratique, dit M. Ollé-Laprune, voilà tout un mouvement dont cet esprit est l'auteur, mouvement de synthèse scientifique et de rénovation sociale, avec une méthode qui se donne pour exigeante et sévère, avec des aspirations qui ont quelque chose de généreux, l'œuvre ne se fait pas ».

Nous prétendons démontrer le contraire : démontrer que « *l'œuvre se fait* » ; qu'elle avance lentement mais sûrement. Se donnerait-on la peine de discuter, de combattre une doctrine qu'on ne sentirait point en passe de s'emparer des intelligences et des cœurs ? Or, le Positivisme est aujourd'hui étudié, discuté. Le livre du R. P. Grüber lui-même n'en est-il pas une preuve ? Nous prétendons même que l'œuvre s'affirme, qu'elle avance, qu'elle gagne plus rapidement et sur un plus large espace que le christianisme ou le catholicisme à ses débuts. Que sont quelques siècles dans la vie de l'Humanité et dans l'histoire d'une doctrine destinée à régénérer le monde ! La parole de Jésus que prêcha, qu'importa le grand saint Paul dans le monde oriental gréco-romain, a mis de proche en proche près de cinq siècles à pénétrer en Gaule, huit à dix pour la Germanie, douze pour la Russie. C'est un pas de tortue. Le Positivisme pénètre partout à la fois et dans les deux hémisphères, dans l'ancien et dans le nouveau monde. C'est une envolée que rien ne peut arrêter, que rien n'arrêtera.

Sans doute, de même que le christianisme à son commencement était écrasé par la masse polythéique ou païenne du monde romain, le Positivisme l'est aujourd'hui par la puissante organisation catholique ; mais, malgré la masse qui l'enserme, quelle poussée vigoureuse en tous sens, quelle sève puissante et quelle frondaïson !

Nos adversaires la constatent eux-mêmes cette vitalité du Positivisme. Pour preuve, et témoignage en même temps des contra-

dictions de l'auteur, nous n'avons qu'à couper dans la préface ci-dessus citée de M. Ollé-Laprune : « Sans doute l'église positiviste a peu d'adeptes. Le R. P. Grüber le sait bien, et il distingue avec beaucoup de raison deux choses : le Positivisme strict qui est une doctrine et mieux encore une église, et le Positivisme large qui est une méthode et un esprit. C'est celui-ci qui est partout à l'heure qu'il est. Mais l'église a ses fidèles. Il importe de ne pas l'oublier. Elle en a à Paris, à Londres, à Stockholm, Rio-de-Janeiro ». Et ceci est écrit trente-cinq ans après la mort de Comte. — Mais continuons : « Nous reviendrons tout à l'heure sur l'influence que l'église positiviste exerce au Brésil surtout. Ce que nous voulons noter ici, c'est que la tentative de devenir une religion est si bien un des traits du Positivisme qu'on la voit survivre partout aux railleries dont elle est l'objet. Et là même où la philosophie positive l'emporte, des aspirations analogues sont très visibles. Les conceptions de la dernière période de la vie de Comte ont plus d'influence qu'on ne croit sur ce Positivisme au sens large qui envahit de nos jours tous les domaines de la science et de la vie publique. On pourrait même dire que toutes ses idées dominantes ont pris corps en quelque façon dans la société moderne. On a souvent ri du culte institué en l'honneur de Clotilde de Vaux et du pouvoir spirituel qu'il voulait établir. Mais la « libre-pensée », même dégagée de ces rites, en retient quelque chose. Il y a de nos jours un certain culte de la femme et de l'art qui imite, qui parodie le culte vraiment religieux. N'y aurait-il pas là, avec d'autres influences, quelque trace des idées de Comte et de ses pratiques. Surtout la « libre-pensée » affirme hautement la prétention d'exercer de fait, au nom de la science, le pouvoir spirituel dont Auguste Comte a jeté les bases théoriques dans ses ouvrages et dont il a essayé l'organisation..... C'est bien à s'emparer des âmes que l'on travaille, c'est bien une unité intellectuelle et morale nouvelle que l'on veut préparer, et par là, une unité sociale très forte..... Ces idées se font jour de toutes les manières.....

« Reportons maintenant notre attention sur l'église positiviste elle-même. Elle a peu d'adeptes, avons-nous dit. C'est littéralement vrai de la France, encore qu'elle ait à Paris le successeur de Comte comme grand-prêtre de l'Humanité. Mais il y a des pays où elle est bien autrement vivante qu'en France. J'ai parlé tout à l'heure du Brésil. Les événements récents qui y ont eu lieu donnent aux études du P. Grüber un intérêt tout particulier et de circonstance. C'est en effet sous les auspices d'Auguste Comte



que s'est opérée la révolution brésilienne. L'homme qui a le plus contribué à l'établissement du régime nouveau, Botelho de Magalhaës, mieux connu sous le nom de Benjamin Constant, était le fondateur de la société positiviste de Rio-de-Janeiro, et il est resté positiviste convaincu jusqu'à sa mort. D'ailleurs la devise d'Auguste Comte : *ordre et progrès*, est devenue la devise de la République brésilienne ; et si l'on jette un coup d'œil sur le recueil des arrêts du nouveau gouvernement, on y reconnaît sans peine l'influence de Comte sur le mouvement politique du Brésil : style et idées, tout est du positivisme le plus orthodoxe ; plus d'un décret n'est que la mise en pratique du *Système de politique positive*. Il y a même des raisons de penser que c'est aux influences positivistes qu'il faut attribuer le renversement du dictateur Fonseca. Ce seraient, assure-t-on, les conseils donnés par l'Église positiviste du Brésil à différents hommes politiques qui auraient mis le dictateur dans la nécessité de donner sa démission. Ce qui est certain, c'est que les positivistes brésiliens se sont hâtés d'élever un temple de l'Humanité à Rio-de-Janeiro ».....

« Le Positivisme large et le Positivisme strict sont l'un et l'autre vivants et puissants. »

Donc l'œuvre se fait, et plus promptement, et sur un plus vaste espace que ne s'est faite celle du catholicisme, à la dislocation duquel nous assistons d'ailleurs, depuis la révolte de Luther.

Toute une série de preuves que « *l'aurore se fait* », qu'elle s'affirme, qu'elle pénètre partout, ce sont les articles ci-dessous que M. L. Momenheim a recueillis un peu partout dans les journaux, dans les discussions parlementaires et qu'on pourrait indéfiniment multiplier. C'est la preuve topique et par le fait.

Enfin, un organe spécial, la *Revue philosophique* qui, dans son numéro de mai 1891, consacra un article considérable au livre du P. Grüber, termine ainsi : « Une conclusion très nette se dégage en définitive du travail de M. Grüber : c'est qu'il n'y a plus aujourd'hui réellement en présence que deux écoles de philosophie, l'une religieuse et l'autre scientifique, le Thomisme ou philosophie chrétienne et le Positivisme ».

Pour nous, quelle que soit l'infinité présente du Positivisme, la victoire n'est pas douteuse. L'un est à son aurore et l'autre à son déclin. Pour l'un c'est le matin et l'élan radieux, c'est la verte jeunesse ; pour l'autre la vieillesse. La doctrine de saint Thomas se meurt et se dessèche. *Cum gloriâ, requiescat in pace !*

Aussi, sans polémiquer davantage, répétons-nous pour conclusion : « Le christianisme a mis près de dix siècles à conquérir

l'Europe; le Positivisme en mettra moins de cinq à conquérir le globe. La grande œuvre aujourd'hui, l'œuvre utile entre toutes, l'œuvre excellente, l'œuvre sainte, la pacifique et moderne croisade est de travailler à son installation théorique et pratique, à l'organisation de son enseignement et du recrutement sacerdotal.

## 2<sup>e</sup> FÊTE ANNIVERSAIRE D'AUGUSTE COMTE

Si l'on nous demandait à quoi tient la stupéfiante victoire du petit peuple japonais sur l'immense empire de la Chine, nous répondrions sans hésiter : à l'application de la science occidentale, à l'armement général du Japon, à sa marine, à son artillerie. Le triomphe japonais c'est le triomphe de la science sur le vieil empirisme oriental.

La science a produit dans les arts mécaniques et physiques des progrès qui étonnent l'imagination. Les mêmes procédés d'observation, d'expérience, d'abstraction, de généralisation qu'emploie la science cosmologique, appliqués aux arts supérieurs de la politique et de l'éducation ou en d'autres termes à l'organisation sociale et à la morale, c'est-à-dire encore à l'amélioration de l'homme lui-même, donneront des résultats non moins surprenants, non moins féconds.

Le monde social, le monde intellectuel, le monde moral ont leurs lois tout comme le monde physique. De même qu'il y a des lois naturelles en physique, en chimie, il y a des lois en biologie (science de la vie), en sociologie et en morale ou sciences de l'homme. La connaissance de ces lois appliquée au gouvernement des hommes et des peuples, à la politique et à l'éducation, n'aura pas des résultats moins merveilleux que celle des lois physiques à la construction des ponts et au perfectionnement des moyens de communication.

Mais la découverte des lois sociales et morales ne pouvait se produire qu'après celle des sciences plus simples. En toutes choses l'esprit humain va du simple au composé; c'est lumineux et clair comme le jour. De même qu'il y a une hiérarchie des sciences allant des plus simples aux plus compliquées : mathématique, mécanique, physique, chimie, biologie, sociologie et morale, de même il y a une suite chronologique des progrès et des arts qui leur correspondent, les plus compliqués ne pouvant se produire qu'après les plus simples sur lesquels ils s'appuient.

Après les progrès de la physique, ceux de la chimie ; après la constitution de la chimie, celle de la biologie.

Comme pour vérifier cette loi du progrès que nous venons d'énoncer, remarquons que ces deux dernières sciences, la chimie et la biologie, sont de date récente, que la chimie n'a été constituée qu'à la fin du siècle dernier par Lavoisier, et la biologie, au commencement de celui-ci, par Gall et Bichat.

Vers le premier tiers de ce siècle, un grand pas restait encore à faire pour achever la construction de l'échelle encyclopédique ; les deux derniers échelons de la série scientifique, la sociologie et la morale restaient à gravir : ascension ardue parce qu'alors la complication des phénomènes à étudier atteignant son maximum, la découverte des lois était incomparablement plus difficile. Il a fallu le puissant génie de Comte pour arriver aux premières lois de ces sciences suprêmes.

Il est à noter que ces premières lois sont toujours les plus importantes : dès que Lavoisier découvre la composition de l'air, de l'eau et de quelques oxydes, tout le fatras du phlogistique et de l'ancienne alchimie s'éclaircit, se simplifie comme par magie. Partout l'ordre et la lumière, c'est un enchantement.

De même qu'après la constitution chimique de Lavoisier les développements des industries chimiques et agricoles ont été rapides et brillants, de même après la constitution de la sociologie et de la morale par Auguste Comte, les progrès seront rapides et profonds soit qu'il s'agisse de politique, de gouvernement temporel et spirituel, de pacification intérieure ou extérieure, soit qu'il s'agisse d'instruction, d'éducation, de rénovation religieuse.

Améliorer la terre, améliorer l'industrie est certes quelque chose, mais qui ne sent de suite que améliorer l'homme lui-même est bien plus encore ; que bonheur, harmonie, que progrès en toutes choses, que tout dépend de là ; que l'éducation est la question primordiale ; qu'en améliorant l'homme en force, en santé, en savoir, en sagesse, simplicité de mœurs et sobriété, en tendresse, pureté, dignité, vigueur morale, tout viendra par surcroît : avec plus d'amour, plus d'ordre et de justice, l'abondance et la paix.

Telle est l'importance de l'œuvre de Comte. Encore faut-il qu'elle soit connue et acceptée pour qu'elle puisse rendre les services qu'on a tout lieu d'en espérer ; encore faut-il qu'elle ait pour elle l'opinion. — Que nous en sommes loin ! — Cette œuvre est si vaste que ce n'est pas sans un véritable effort d'étude et de méditation qu'on arrive à l'assimiler. D'autre part elle se heurte à

d'anciennes doctrines éminemment respectables sans doute, éminemment vénérables pour les services qu'elles ont rendus dans le passé, mais qui n'ont que trop prouvé leur impuissance radicale à résoudre les questions qui s'imposent à notre fin de siècle, questions de travail, d'enseignement, de prévoyance sociale que laisse trop en dehors le dogme de Jésus qui proclame que son royaume n'est pas de ce monde.

Ainsi que le prouve l'histoire de quelques autres grandes découvertes, celle de Newton, celle de Galilée, une certaine élite conquise, la masse suit nécessairement ; telle sera l'histoire de la propagande positiviste.

Le problème social, la question sociale est donc subordonnée à celle de l'éducation, de l'éducation générale, de l'éducation des petits et des grands, des jeunes et des vieux, des humbles et des puissants.

L'éducation est de toute la vie. A tout âge, nous devons avoir pour but d'apprendre, de nous instruire ; pour objectif, de nous perfectionner en toutes choses : tel le digne père Chevreul, au banquet de son centenaire, revendiquait le titre de doyen des étudiants, comme celui qu'il avait le plus à cœur. L'éducation est de toute la vie, ne cessons pas de le redire. L'homme et la chair sont faibles. A tout âge, nous avons besoin que quelqu'un, quelque chose nous enseigne, nous rappelle nos devoirs. Seul, un nouveau sacerdoce, régénéré par le baptême de la science, pourra être à la hauteur de cette grande fonction d'enseignement, de moralisation, applicable aux deux sexes, à tous les âges ; seul ce nouveau sacerdoce pourra suffire à cette haute fonction d'éducation générale, fonction la plus utile, la plus noble qui soit.

Jusqu'ici, jusqu'à Auguste Comte, la science avait été fragmentaire et spéciale, jusqu'alors sans doute avait-elle mérité le reproche d'étroitesse, de sécheresse, d'insuffisance, de « banqueroute » selon une retentissante boutade. Personne, avant le grand rénovateur moderne, n'avait fait l'histoire philosophique ni la synthèse du savoir humain, personne ne l'avait doté de son complément sociologique et de son couronnement moral, personne n'avait fait systématiquement la part du cœur et des sentiments. Par la constitution sociologique et morale de Comte comme par un flambeau radieux, tout s'éclaire, s'enchaîne d'un lien sympathique, tout s'harmonise. Le cœur reprend ses droits ; l'altruisme, l'amour étend son légitime empire.

Selon la célèbre maxime de Vauvenargues : « Les grandes pensées viennent du cœur », au souffle génial et chaleureux de

Comte, tout s'éclaire et s'organise. Non, la science ne fait point faillite ! Son règne va s'affirmer plus que jamais car son grand prophète est venu. Pour parler comme les bouddhistes, nous dirions volontiers qu'il vient de se faire une nouvelle incarnation du sage, du Bouddha, et pour parler comme les chrétiens, qu'un nouveau Rédempteur a surgi.

Trop de lettrés ignorent la doctrine de Comte, trop de savants n'en ont aucune idée ou la connaissent mal. C'est un bienfait public que la répandre et la développer. C'est à cette œuvre et longue et grande et méritoire, c'est à cette œuvre sainte que se dévouent un groupe de disciples vaillants et fidèles, sous la direction du plus éminent d'entre eux, M. Pierre Laffitte, professeur au Collège de France. Telle est la croisade moderne qui sollicite les vaillants, les puissants et les forts ; telle est la mission sacrée qui s'offre aux hommes de bonne volonté, d'intelligence et de cœur.

La carrière est ouverte ; vraie mine d'or inépuisable, plus précieuse, cent fois plus utile au bien de l'Humanité et des générations futures que toutes celles de l'Australie et du Sud-Africain. Elle est ouverte à tous. Chacun peut y puiser. Et les ouvriers sont venus, ceux de la première et de la deuxième heure. D'autres viendront.

Ce n'est pas la fortune pourtant qui s'offre à ces pionniers ; c'est le travail ardu, l'abnégation. Les ouvriers sont venus ; d'autres viendront !

Le chercheur d'or, l'explorateur du Rand, est poussé par la fièvre de l'or ; le chrétien se soutient par l'espoir du salut ; nos nouveaux missionnaires, eux, ne sont animés que par la sainte passion du bien public. A l'idéal du chrétien : « Servir Dieu en vue d'une vie meilleure en l'autre monde », ils opposent celui qu'ils trouvent supérieur : « Servir leur pays et l'Humanité sans autre espoir de récompense que le plaisir de servir, que la conscience de travailler à une œuvre mille fois féconde. »

Les ouvriers sont venus, d'autres viendront !

La présente publication a pour but de prendre sur le vif le culte que ces disciples fidèles rendent au fondateur du Positivisme, à Auguste Comte, culte qui consiste essentiellement à vulgariser sa doctrine, expliquer les formules qui la résument, l'appliquer aux faits actuels, à la politique contemporaine, à nos moyens d'éducation, en inspirer gouvernants et gouvernés ; à inviter surtout les chercheurs, les studieux, les pasteurs d'hommes, tous ceux en un mot que préoccupent les questions sociales et morales, à

l'étude et à la méditation des travaux du grand penseur moderne.

A ceux-là et à tous, indépendamment des deux discours que nous offrons et qui ne peuvent que résumer certains aspects du Positivisme, nous recommandons les indications bibliographiques qui les suivent afin que chacun puisse s'alimenter aux sources, c'est-à-dire aux œuvres d'Auguste Comte, à celles de ses disciples et commentateurs.

Bénévent-l'Abbaye. (Shakespeare, 107.-Septembre 1895.)

D<sup>r</sup> Albert JABEY.

---

# MATÉRIAUX

POUR SERVIR A LA

## BIOGRAPHIE D'AUGUSTE COMTE

---

### LOUIS COMTE, PÈRE D'AUGUSTE COMTE

Il est utile, sans qu'il soit besoin d'insister, de faire connaître autant que cela sera possible, et au moyen de documents positifs, la famille d'Auguste Comte. Nous allons commencer par son père.

Ce fut un homme profondément honorable, de grande rectitude de vie et d'une haute probité. Il remplit du reste envers son fils, et dignement, tous ses devoirs de famille.

Comte, Louis-Auguste-Simon, est né à St-Hippolyte-du-Fort (1), chef. l. de canton de l'arrondissement du Vigan (Gard), le 17 août 1776, et il est mort à Montpellier, le 10 juin 1859, rue Fournarie (2). Il est entré dans les bureaux de la recette générale de l'Hérault au commencement du mois de juin 1799, et il a occupé cette position jusqu'en 1846 (3).

(1) St-Hippolyte-du-Fort, 4079 habitants, ch. l. de c. de l'arr. du Vigan, sur les rivières du Vidourie et de l'Argentesse — Restes des remparts; fort bâti par Vauban; tour St-Louis; château ruiné du Castelas, à St-Hippolyte-le-Vieux — Grottes — (Dictionnaire des communes. Joanne, Géog. du Gard).

(2) Voir pièces justificatives, nos 2 et 3.

(3) Voir aux pièces justificatives le mémoire intitulé « Mémoire justificatif, par M. Comte, ancien chef de bureau de la recette générale du départ de l'Hérault. — Brochure in-8° de 30 pages. Paris, imprimerie Ed. Ploux et C<sup>ie</sup>, rue Neuve-des-Bons-Enfants, 5, 1846.

Il perdit sa situation par suite de la corruption que développe spontanément le système parlementaire, surtout avec le suffrage restreint ; quelques voix pouvant faire échouer ou triompher une candidature, on emploie tous les procédés possibles pour les obtenir. Cette corruption électorale fut en effet très frappante sous le règne de Louis-Philippe. Louis Comte était légitimiste et catholique, quoique nullement clérical, mais il restait en dehors de toute action politique quelconque, comme cela résulte de sa déclaration, dont il n'est permis de douter à aucun degré.

Il publia au sujet de sa mise à la retraite prématurée un mémoire que j'ai eu l'heureuse chance de pouvoir me procurer et que je publie parmi les pièces justificatives jointes à ce travail. La vie de Louis Comte fut uniforme et sans événement et sa mise à la retraite comme caissier à la recette générale est le seul fait que l'on puisse signaler dans sa longue carrière, toute de dignité, de modération et de devoirs accomplis. Il remplit ses devoirs de chef de famille de la manière la plus digne. C'est grâce à son dévouement et à son économie qu'il put faire arriver son fils à l'Ecole polytechnique, et comme l'enseignement de cette école a été capital dans le développement philosophique d'Auguste Comte, on peut dire que Louis Comte a rendu à l'Humanité tout entière un service qui méritera une éternelle reconnaissance.

En Chine, la gloire remonte au lieu de descendre, celle qu'a méritée le fils remonte vers le père et les ancêtres, c'est là une admirable conception et un sentiment profond de la continuité sociale. Nous devons l'appliquer au cas du père du grand philosophe.

Outre les principes de haute probité, Auguste Comte tenait de son père des habitudes d'ordre et de régularité que celui-ci décrit au commencement de sa brochure, et que ses fonctions mêmes de comptable avaient dû perfectionner.

Le *Mémoire justificatif* de Louis Comte a un réel intérêt historique, parce qu'il nous fournit de précieux documents sur le fonctionnement intérieur des recettes générales ; élément essentiel de notre système financier.

Louis Comte eut trois enfants : deux fils et une fille, l'aîné fut Auguste Comte ; le second fils, Adolphe, mourut jeune aux colonies.

M<sup>lle</sup> Alix Comte consacra ses soins à son père jusqu'à sa mort. Quoique sa conduite envers lui ait souvent laissé à désirer, — c'est une question sur laquelle nous reviendrons — je crois



néanmoins que la décision que j'ai prise par rapport à elle doit être approuvée. Je lui ai, en effet, constitué après la mort de son père, sur le subside positiviste, une rente de 1,200 francs qui lui a été régulièrement payée jusqu'à sa mort ; du reste, ma décision envers elle, telle qu'elle a été expliquée dans mes circulaires, n'a jamais soulevé aucune objection de la part des positivistes. On doit regretter qu'elle n'ait pas conservé davantage les souvenirs de famille qui auraient pu être très précieux. Je me contente de ces courtes indications, attendu que je me propose de revenir sur un tel sujet, de manière à publier tout ce que je pourrai trouver sur Auguste Comte et sa famille.

Après ma mort, le problème de ces publications présentera plus de difficultés. Du reste, les indications que je donne pourront guider les chercheurs qui viendront après moi.

Paris, 30 mars 1896 (6 Archimède 107).

P. LAFFITTE.

---

## PIÈCES JUSTIFICATIVES

---

- 1° Mémoire de Louis Comte.
  - 2° Extrait de naissance de Louis Comte.
  - 3° Extrait de décès de Louis Comte.
  - 4° Trois lettres d'Auguste Comte à son père.
  - 5° Deux lettres d'Auguste Comte à sa sœur.
  - 6° Une lettre d'Auguste Comte à sa nourrice.
- 

### I

## MÉMOIRE JUSTIFICATIF

PAR M. COMTE

Ancien chef des bureaux de la recette générale du département de l'Hérault

### AVIS

Ce mémoire, qui était imprimé depuis la mi-mai dernier, n'a pu être distribué par l'effet d'une circonstance indépendante de

ma volonté, et que M. Roulleaux-Dugage connaît aussi bien que moi ; j'ai donc été obligé de le faire réimprimer, et c'est ce qui en a retardé la publication.

Montpellier, le 3 juin 1846.

C...

Paris. — Imprimerie Edouard Proux et C<sup>ie</sup>, rue Neuve-des-Bons-Enfants, 3. — 1846.

Français, réjouissez-vous, la Patrie est sauvée !!!...

Après deux ans d'efforts inouïs, de sollicitations pressantes, répétées, verbales et par écrit, M. Roulleaux-Dugage, préfet du département de l'Hérault, est enfin parvenu à vous débarrasser..... de qui ? de ce qu'il appelle un *vieux carliste encroûté*, qui depuis quarante-sept ans (1), était employé dans les bureaux de la recette générale de ce département, et qui a constamment géré son emploi à la satisfaction du public, et des divers receveurs généraux qui s'y sont succédé. Quel triomphe éclatant ! que de grâces ne devez-vous pas lui rendre ! Non content d'être parvenu à se débarrasser du lieutenant-général commandant la division, du procureur général près de la cour royale de Montpellier, du recteur de l'académie de la même ville, du receveur général mon honorable chef, du sous-inspecteur des écoles primaires, etc., etc. ; il a cru sans doute qu'il manquait encore un fleuron à sa couronne, c'est-à-dire qu'il fallait qu'il brisât la position d'un vieux employé, très peu fortuné, plié sous le poids des ans : tel est l'homme qui embarrassait tant M. Roulleaux-Dugage !!!.....

Avant d'énumérer les griefs que M. Roulleaux-Dugage articule contre moi, je crois utile de faire connaître le genre de vie que je menais et que je mène encore, à la seule différence que je ne me rends plus dans les bureaux de la recette générale.

Je me lève habituellement à cinq heures du matin, je déjeunerai à huit, je sortais de chez moi à neuf pour me rendre à mon bureau, où je restais jusqu'après cinq heures du soir, sans jamais sortir un quart d'heure dans le courant de la journée ; je rentrais chez moi pour recommencer le lendemain ce que j'avais fait la veille. Je n'appartiens à aucun des nombreux cercles ou réunions qui existent à Montpellier ; je ne fais partie d'aucune confrérie ou congrégation ; je ne fréquente pas les cafés, et je serais fort en peine de dire s'ils sont bien ou mal décorés ; on ne me voit jamais dans les promenades publiques, ni dans aucun rassemblement ; dans l'espace de 32 ans, j'ai été une seule fois au

(1) Je suis entré dans les bureaux de la recette générale au commencement du mois de juin 1799.

spectacle, et il y en a environ 23 que je n'ai pas remis les pieds dans la salle. J'abhorre le jeu et n'en connais aucun. Les seules distractions que je me procure se bornent à cultiver quelques fleurs et à élever quelques oiseaux. Si on avait à me parler, on était à peu près sûr de me trouver chez moi ou à mon bureau, voire même le dimanche, car je suis dans l'habitude d'entendre la messe qui se dit à cinq heures du matin ; le public jugera si c'est là le genre de vie d'un conspirateur, et je défie tous les mouchards de M. Roulleaux, et qui que ce soit de ses affidés, de me prouver que ce que j'avance n'est pas exact.

M. Roulleaux m'accuse de ne rien faire pour la réussite de l'élection du candidat ministériel, de chercher à influencer au contraire les opinions des percepteurs en matière électorale et politique, de les faire trembler, et de m'opposer à l'avancement de ceux qui lui sont le plus dévoués : je ne crains pas d'en appeler au témoignage de ces comptables ; ils certifieront, j'en suis sûr, que je ne leur ai jamais parlé d'élections, ni de politique, jamais !

Si M. Roulleaux avait connu l'organisation des bureaux de la recette générale, il se serait convaincu que les percepteurs effectuaient leurs versements entre les mains du sous-caissier qui leur en délivrait un bulletin ; qu'ils passaient de là dans le bureau de la recette particulière où on vérifiait leur comptabilité, et où on leur délivrait les récépissés à talon ; de la sorte, la plupart du temps, les percepteurs entraient et sortaient du bureau sans que je les visse ; d'ailleurs, le mauvais état de ma vue me permettait à peine de les reconnaître ; j'ajouterai que depuis plus de douze ans je n'étais plus chargé, toujours à cause de ma vue, de vérifier ces comptables à leur domicile, d'où il résulte évidemment que je n'avais aucun rapport direct avec eux.

De tous les percepteurs qui ont demandé de l'avancement et qui passent pour être dans l'intimité de M. Roulleaux, un seul n'en a pas reçu, et un autre n'a pas obtenu tout à fait ce qu'il désirait. Le lecteur jugera si c'est par leur propre fait, ou par suite de l'empêchement qu'y a mis la recette générale ; je m'abstiendrai de nommer non seulement les deux individus qui sont sans doute mécontents, mais encore ceux dont la position a changé à leur avancement ; je les désignerai seulement sous les lettres A, B, C, D, etc., dans les notes, numéros 1, 2, 3, 4, etc., qu'on trouvera plus loin.

Le public trouve comme moi que M. Roulleaux s'est comporté, dans cette occasion, d'une manière peu digne des hautes fonctions qu'il remplit ; il paraissait plus naturel, en effet, qu'une fois calomnié, il eût dû me faire appeler, me donner connaissance des griefs qu'on m'imputait, et exiger de moi que je me justifiasse : c'eût été également plus juste, plus équitable ; mais, au lieu d'user de cette voie, M. Roulleaux a préféré me noircir auprès du ministre de l'intérieur, et s'acharner à demander mon renvoi des bu-

reaux de la recette générale. Mais, me dira-t-on, votre destitution était sans motif et sans utilité pour la chose publique ! C'est vrai, seulement quelques personnes expliquent le but de M. Roulleaux ; il avait, assure-t-on, disposé de ma place et de celle de M. Combemale, mon collègue, qui a été enveloppé dans la même mesure, en faveur de deux courtiers électoraux de l'arrondissement de Montpellier. Quel a dû être son désappointement quand il a appris que M. Portalis, nouveau receveur général, amenait avec lui deux employés pour remplir le vide que laissaient mon renvoi et celui de M. Combemale. Le triomphe de M. Roulleaux n'est donc pas aussi complet qu'il s'y attendait ; M. Portalis ne pouvait pourtant guère faire différemment que de se faire suivre par deux employés qui avaient déjà sa confiance : cette détermination était d'autant plus nécessaire que M. le ministre des finances *lui avait imposé l'obligation* de renvoyer les deux fondés de pouvoirs de son prédécesseur ; cette condition *sine quâ non* avait été exigée par M. Duchâtel, ministre de l'intérieur, et son collègue des finances n'a pu résister à cette exigence dont je fus informé dès la mi-décembre.

Ceci me rappelle qu'en 1832 M. Montalivet, alors ministre de l'intérieur, demanda, en conseil des ministres, la destitution de M. Despons, receveur général ; en 1846, c'est encore le ministre de l'intérieur qui a demandé ma destitution. Oh en sommes-nous donc ? Oh nous conduira tout ceci, si les ministres, dans leurs départements respectifs, ne sont pas les maîtres de faire ce qu'ils veulent ? Mais, me dira-t-on, avant tout, sous un gouvernement parlementaire, il faut à tout prix assurer les nominations des candidats ministériels, et comme les élections sont du domaine du ministre de l'intérieur, c'est celui-ci qui maîtrise ses collègues. Ce n'est pas tout, les préfets à leur tour maîtrisent le ministre de l'intérieur, et, quand ils veulent obtenir quelque chose, ils ne manquent jamais de dire, d'affirmer que, si elle leur est accordée, ils répondent de l'élection du candidat de leur parti ; que, dans le cas contraire, leur candidat échouera infailliblement : le mot *élection* est devenu magique, c'est le croquemitaine dont les préfets se servent pour effrayer le ministère et leurs adhérents : aussi nos électeurs campagnards commencent-ils à sentir tout ce qu'ils valent ; ils ne craignent pas de parler, sur un ton élevé, aux maires de leur village, surtout quand ces derniers ne sont pas électeurs ; ils leur disent sans crainte qu'ils se moquent d'eux, qu'ils sont plus qu'eux, parce qu'ils sont *électeurs*. La majorité exerce un pouvoir tyrannique, l'électeur agit de même !

Ce n'est pas tout encore, M. Roulleaux ne s'enquiert pas si les postulants aux places de percepteurs ont la capacité nécessaire pour bien remplir leur devoir, peu lui importe, pourvu qu'ils soient *bons électeurs* ou qu'ils aient de l'influence sur ceux-ci ; selon lui, la capacité doit être mise au second rang, et si le percepteur

n'est pas en état de bien tenir sa comptabilité, il doit prendre un commis, un aide, un gérant, et ce moyen est sans doute fort consolant pour les receveurs des finances qui sont responsables de la gestion des percepteurs, tant sous le rapport pécuniaire que sous le rapport de la tenue des écritures.

Non seulement, le 16 ou le 17 décembre, je fus prévenu que quelqu'un écrivait de Paris que M. Roulleaux avait demandé au ministre d'imposer au nouveau receveur général l'*obligation expresse* de renvoyer les deux fondés de pouvoirs de M. Bricagne; mais encore je sus, environ un mois après, que M. Roulleaux, pendant son séjour à Paris (en décembre et janvier), ne cessait de déclamer dans les bureaux du ministère contre les employés de la recette générale; j'ai donc eu le temps de me préparer à recevoir le coup qui vient de me frapper; aussi l'ai-je supporté avec le courage et la fermeté que donne la conscience.

Lorsque je faisais part de mes craintes à mes amis, à mes connaissances, on me disait que je me créais bien gratuitement des soucis imaginaires, que la chose n'était pas possible; que, ne me mêlant de rien autre chose que de mes devoirs de bureau, je n'avais aucune raison de craindre; que quelque colère, orageux et brutal que fût M. Roulleaux, il n'en viendrait jamais là envers un vieux employé vivant en dehors de la politique.

Une infinité de personnes recommandables m'engageaient à avoir une entrevue avec M. le préfet; d'autres s'offraient à aller le trouver pour lui parler en ma faveur; j'ai constamment prié et supplié ces derniers de n'en rien faire; je leur disais que, si M. Portalis arrivait sans ordres ministériels, j'avais la plus grande chance de rester, et que dans ce cas je ne voulais pas avoir d'obligation à M. Roulleaux, qui, j'en étais certain, agissait activement contre moi, et n'aurait pu m'être d'aucun appui auprès de M. Portalis, si ce dernier était porteur d'ordres impérieux, ce qui a eu lieu en effet. Le temps a donc prouvé que j'avais raison: aussi, j'ose le dire avec quelque fierté, mon renvoi a excité une indignation générale dans la ville de Montpellier, et ceux qui me blâmaient de ne pas faire de démarches auprès de M. Roulleaux me félicitent aujourd'hui de la conduite ferme et digne que j'ai tenue.

Depuis longtemps j'entends dire que si le gouvernement paie M. Roulleaux pour lui susciter des ennemis, il est certain qu'il gagne bien le traitement qu'il reçoit; mais que, si, au contraire, le gouvernement désire que M. Roulleaux fasse ses efforts pour rallier les esprits, il est positif qu'il ne devrait pas toucher un denier du trésor: cette critique sévère, mais juste, est encore plus répandue, plus irrécusable, depuis que le public connaît l'inqualifiable mesure dont je suis l'objet et la victime.

M. Roulleaux m'accuse de *carlisme* et me qualifie de *vieux carliste encroûté*; oui, je l'avoue, mes opinions politiques sont basées

sur mes convictions qui n'ont jamais varié; je n'en suis pas moins partisan zélé de la paix, du bon ordre et de la soumission aux lois, et non de leur constante violation. Est-ce que par hasard M. Roulleaux-Dugage voudrait qu'après cinquante ans d'efforts pour conquérir la liberté nous n'eussions pas eulement celle de penser? Ce serait par trop fort! Je déclare que je n'ai rien à me reprocher dans ma vie politique et privée; je ne me suis jamais occupé, je le répète, que de remplir exactement mes devoirs dans les bureaux de la recette générale, et je défie M. Roulleaux lui-même de me prouver le contraire.

J'ai dit plus haut qu'en décembre 1845 j'avais été prévenu que M. Roulleaux avait demandé au ministre d'imposer mon renvoi au nouveau receveur général, ainsi que celui de mon collègue M. Combemale. Je cherchais en vain dans mon esprit ce que j'avais pu faire pour mériter un pareil désagrément, une pareille flagellation administrative, ma conscience ne me reprochant rien; ce n'est que depuis peu de temps que j'ai connu le motif plus particulier de l'acharnement avec lequel M. le préfet me poursuivait dans l'ombre; le voici.

Le public doit se rappeler qu'en 1844 M. de Larcy, un des cinq députés flétris, ne fut réélu qu'à la simple majorité d'une voix, et c'est cette faible majorité qui a brisé ma position!

M. Roulleaux, dans un de ces moments de bel emportement qui lui sont si familiers, s'écriait en frappant fortement sur son bureau..... « *Maudite recette générale! Coquine de recette générale!* C'est toi qui es la seule cause que mon candidat n'a pas été élu; si tu avais fait quelques démarches tu aurais réussi à me procurer quelques voix et j'aurais triomphé; mais tu as préféré de ne te mêler de rien, et rester tranquille au milieu de tes chiffres et de tes écus (1) : Tu me le paieras !!! Tu me le paieras !!! »

(1) Je crois devoir rapporter le fait suivant :

En novembre 1830, j'eus une entrevue avec M. Fumeron d'Ardeuil, alors préfet de l'Hérault, et la conversation nous amena à parler des percepteurs. A cette époque on cherchait déjà des motifs de destitution, et les percepteurs ne furent pas ménagés, puisque sur les vingt-huit qui existent dans l'arrondissement de Montpellier, quatorze furent révoqués. M. Fumeron d'Ardeuil m'avoua qu'il concevait la fausse position dans laquelle s'étaient trouvés les percepteurs, accusés, à tort ou à raison, d'avoir fait quelques démarches en faveur du candidat ministériel, et il ajouta : « *Que le gouvernement déchu ne se laverait jamais de la tache qu'il s'était faite en voulant transformer les hommes de finances en agents politiques.* » M. Fumeron avait raison de penser que les hommes de finances ne doivent s'occuper que du recouvrement de l'impôt.

Je viens de dire qu'en 1830 des percepteurs furent destitués pour être soupçonnés d'avoir fait des démarches en faveur du candidat du

Je vois malheureusement que le méchant, que l'homme du système a tenu parole ! Au lieu d'accuser la recette générale, M. Rouleaux devait s'accuser lui-même, et reconnaître que la non-réussite de l'élection de son candidat ne doit être attribuée qu'à sa conduite dure, absolue et brisante, notamment envers M. Sarrau, maire de Gigean, conduite qui assurément lui a fait perdre bon nombre de voix.

Je ne terminerai pas sans déclarer que j'ai vécu constamment tout-à-fait en dehors de la politique, et qu'il n'a fallu rien moins que la brutalité de M. Rouleaux pour me faire sortir de mon caractère. Ou j'ai de l'influence, ou je n'en ai point. Si j'en ai, le public conviendra avec moi que M. Rouleaux a été bien maladroit de me priver de mes moyens d'existence aux approches des élections ; si je n'en ai pas (et c'est la vérité), il faut convenir que M. Rouleaux ne m'a fait du mal que par le seul plaisir d'en faire, ou bien parce qu'il se croyait assez puissant pour mettre un de ses affidés à ma place.

Je déclare en outre que je n'ai qu'à me louer de mes relations avec M. Portalis, et que ce chef de service m'a témoigné le regret qu'il éprouvait de ne pouvoir me compter au nombre de ses employés, par suite des ordres qui lui avaient été intimés.

Les élections générales approchent, toute la fureur électorale va se trouver aux prises de nouveau : le système, sa pensée, tous les accapareurs de places et de décorations vont renouveler tous leurs efforts, toutes leurs ruses, tous les moyens d'intrigues, de corruption et d'intimidation, pour conserver ou grossir une majorité factice, non celle de la France et des libertés nationales, mais celle que donne une loi impopulaire et jugée ; nous verrons donc bientôt si une administration absolue et à outrance a fait beaucoup d'amis au gouvernement, ou si, au contraire, elle a été funeste à ses intérêts, à ses plans. Quant à moi, je dirai comme Thémistocle : « Donnez-moi l'art d'oublier. »

#### COMTE.

P.-S. — J'avais écrit ce mémoire dès les premiers jours de ma sortie des bureaux de la recette générale, et j'avais hésité jusqu'à ce jour à le publier, lorsqu'il m'est revenu de divers côtés, que mon implacable persécuteur faisait répandre par ses affidés le bruit que j'entretenais des correspondances secrètes contre la sûreté de l'Etat, et qu'il se tenait chez moi des réunions séditieuses ; ces prétendues nouvelles accusations sont si absurdes, si ridicules et si pitoyables, que je ne

*ministère* ; il en est autrement en 1846 : les percepteurs sont destitués ou changés, parce qu'ils sont accusés de ne pas agir assez fortement en faveur du *candidat du pouvoir*, et on enveloppe dans cette mesure deux anciens employés de la recette générale. Il faut convenir que les temps sont bien changés ; si encore le pays et les contribuables y avaient gagné !

prendrai pas même la peine d'y répondre : ce serait par trop m'abaisser.

M. Roulleaux et ses agents, reconnaissant que les deux griefs ci-dessus ne prêtaient qu'à rire de pitié, en ont imaginé un troisième ; ils disent aujourd'hui qu'on ne doit attribuer mon renvoi des bureaux de la recette générale qu'au mauvais état de ma vue ; que les livres que je tenais sont *barbouillés*, *surchargés*, et qu'on ne peut plus s'y reconnaître. Je n'ai qu'un mot à répondre : je n'étais chargé que du livre de caisse, et ce livre existe à la recette générale ; on pourrait donc se convaincre, au besoin, qu'il est impossible de le tenir d'une manière plus propre et plus régulière. Depuis deux ans je l'avais confié, sous ma direction immédiate, à un jeune homme intelligent que je m'étais adjoint ; antérieurement il l'était par un de mes collaborateurs.

Mais, me dit-on continuellement, dans quel but M. Roulleaux vous poursuit-il avec tant d'acharnement ? Je vais l'expliquer.

J'ai fait remarquer plus haut que bien des personnes étaient persuadées que ce fonctionnaire avait promis ma place et celle de mon collègue M. Combemale à deux courtiers électoraux, et qu'il a été passablement désappointé lorsqu'il a vu arriver deux étrangers pour me remplacer ; d'un autre côté, M. Roulleaux a voulu inspirer la terreur à tous les fonctionnaires amovibles et à tous les employés des diverses administrations publiques. Aura-t-il réussi ? C'est ce que nous verrons aux prochaines élections. Toutefois les destitutions ont un double avantage : elles intimident les gens faibles, les gens craintifs et nécessiteux ; elles fournissent d'ordinaire le moyen de satisfaire aux exigences de fidèles dont il faut récompenser le dévouement.

Quand finirez-vous donc, implacable calomniateur ? Osez donc vous montrer ! vous nommer ! fournissez les preuves de vos accusations ! traduisez-moi devant les tribunaux, et ne travaillez pas comme la taupe, dans l'ombre et dans la boue ; mais vous préférez dire comme dans le *Barbier de Séville* : « *Calomnions, calomnions, il en restera toujours quelque chose.* » Agir ainsi, c'est professer la théorie de l'impopularité !! C'est avoir bu toute honte !!!

Montpellier, le 5 mai 1846.

---

*Note n° 1, concernant M. A.....*

Ce perceuteur, qui est extrêmement capable, a été toujours signalé parmi les plus retardataires ; on peut consulter à cet égard :

1<sup>o</sup> Les lettres de la comptabilité générale des finances des 15 septembre 1832, n° 1616 ; du 1<sup>er</sup> octobre 1836, n° 1798 ; du 16 février 1838, n° 383 (ces deux dernières prescrivant au receveur



général d'établir un agent spécial auprès de ce percepteur); et du 13 mars 1845.

2° Les rapports de MM. les inspecteurs des finances qui ont vérifié les comptables du département en 1836, 1837, 1839, 1840, 1841, et 1844;

Le 22 janvier 1845 M. le préfet écrit à M. Bricogne la lettre suivante : « Le sieur A..., percepteur de..., sollicite de l'avancement. Je vous prie de vouloir bien me donner avis sur la gestion de ce comptable, et sur la suite qu'il convient de donner à sa demande que je désire vivement voir accueillie. »

Le 25 janvier, M. Bricogne lui répondit ce qui suit :

« Par la lettre que vous m'avez fait l'honneur de m'écrire le 22 du courant, vous me demandez mon opinion sur la gestion de M. A..., percepteur de..., qui sollicite de l'avancement.

M. A..., par sa connaissance du service et son intelligence, est parfaitement en état de gérer telle perception que ce soit, mais je ne peux pas vous laisser ignorer que, malgré ses qualités, ce percepteur n'est pas classé au premier rang des bons comptables; depuis 1838, époque à laquelle j'ai pris le service dans ce département, il a toujours été signalé dans les rapports périodiques sur les perceptions, comme étant très arriéré dans ses recouvrements, et présentant des frais de poursuites dans une proportion considérable; les rapports de mon prédécesseur, et ceux que MM. les inspecteurs des finances font chaque année, ont toujours exprimé les mêmes plaintes, et l'administration a recommandé plusieurs fois d'employer à son égard des mesures disciplinaires; mon prédécesseur se détermina à employer ce moyen. Quant à moi, j'ai toujours cru qu'un comptable si parfaitement en état de bien gérer viendrait à bout de régulariser sa position; je ne l'ai pas encore obtenu.

« Sans doute que M. A..., pourra dire pour atténuer ses torts, que la perception de..., présente des difficultés pour le recouvrement, en raison du peu d'aisance d'un certain nombre de contribuables; mais je partage l'opinion de MM. les inspecteurs des finances qui soutiennent qu'avec plus de soin et d'activité ce percepteur pourrait obtenir de meilleurs résultats.

« Je conçois qu'il désire changer de perception, je le désire comme lui, et je crois que dans une autre localité l'administration tirerait un meilleur parti de l'instruction et de l'intelligence de M. A....; dans ce cas, je vous prierais instamment, Monsieur le préfet, de faire un bon choix pour la perception de..., qu'il sera bien difficile de ramener à de bonnes habitudes de paiement. »

M. le préfet communiqua cette réponse à M. A..., qui à son tour répondit à cet administrateur; je regrette de n'avoir pas gardé copie de sa réponse; mais on verra plus bas, par la lettre de M. le préfet en date du 15 février 1845, et celle de M. Bricogne du 24 du même mois, ce qu'elle contenait. Voici copie de la lettre de M. le préfet du 15 février 1845 :

« Les renseignements que vous m'avez adressés, le 25 janvier dernier, sur la gestion du sieur A..., percepteur à..., ne me permettent pas de donner suite à la demande d'avancement qu'il a formée; j'ai dû l'en informer et lui adresser des reproches, que

j'exprimais en même temps le désir de voir atténuer par des explications qu'il jugerait convenable de me donner.

« J'ai l'honneur de vous transmettre sa réponse qu'il m'a adressée le 11 de ce mois, en vous priant, monsieur le receveur général, de vouloir bien examiner le mérite des allégations qu'elle contient, et de me faire connaître si le sieur A.... était réellement placé dans une perception présentant des difficultés exceptionnelles pour le recouvrement des contributions, et si les retards et les frais ne doivent pas être attribués plutôt à des difficultés, beaucoup plus qu'à un défaut de zèle du comptable. Je vous prie de m'indiquer la situation *actuelle* du service du sieur A...., et de me donner votre avis définitif sur le point de savoir, s'il y a ou non lieu de proposer au ministre de l'inscrire sur le tableau d'avancement. »

Réponse de M. Bricogne du 24 février 1845 :

« Vous m'avez communiqué une lettre que M. A...., percepteur de..., vous a écrite pour essayer de justifier la fâcheuse position où se trouve la perception qu'il dirige, sous le double rapport de l'arriéré de recouvrements, et de l'exagération des frais de poursuites ; vous me demandez mon opinion sur le mérite des allégations qui sont exprimées dans cette lettre, et si M. A.... ne serait pas réellement placé dans une perception présentant des difficultés exceptionnelles.

« Les explications de M. A.... sont aujourd'hui ce qu'elles ont toujours été depuis le commencement de sa gestion. Dans les premiers moments de mon entrée en fonctions, j'y ai cru, et dans mes rapports au ministère et mes explications à MM. les inspecteurs je m'en suis servi pour excuser cette mauvaise situation ; mais vous pourrez facilement concevoir qu'après tant d'années elles ont singulièrement perdu de leur valeur ; personne ne peut admettre qu'après quatorze années de gestion un percepteur présente pour excuse la situation dans laquelle il a trouvé le service lors de son entrée en fonctions ; ce n'est pas en 1845 que l'on peut nous parler de la mauvaise volonté des contribuables en 1831 ; à cette époque, cette mauvaise volonté était réelle partout dans le midi, mais pas plus à..... qu'ailleurs, et elle a bien promptement cédé à l'emploi intelligent de quelques poursuites rigoureuses qui ont fait entrer l'arriéré sans même accroître la proportion des frais.

La perception de M. A.... n'est pas placée dans une situation exceptionnelle ; elle n'est pas au nombre de ces perceptions qui, n'ayant qu'un seul genre de culture, n'ont qu'une époque de récoltes, et qui, dès lors, sont arriérées pendant une bonne partie de l'année. Les contribuables de cette perception ne sont pas riches sans doute, mais leurs cultures sont variées, et pourraient ainsi permettre à un percepteur connaissant bien le personnel de sa perception de maintenir ses recouvrements dans une proportion raisonnable durant tout le cours de l'année.

« D'après le dire de ce percepteur, la moyenne de ses frais de poursuites ne serait que de 140 fr. par an, ce qui donnerait une proportion par 1,000 fr. de 3 fr. 81 c., ce qui est déjà considérable, mais cette allégation est inexacte ; il résulte d'un relevé que j'ai fait faire que la proportion moyenne de ses frais, depuis son entrée en fonctions, est de 5 fr. 06 c., tandis que la moyenne de ses frai

pour tout l'arrondissement n'est que de 2 fr. 12 c. Si je compare sa situation à cet égard avec celle de tous ses collègues de l'arrondissement, voici ce qui en résulte :

« Sur vingt huit percepteurs de l'arrondissement chef-lieu, deux ne font aucuns frais, trois n'atteignent pas le chiffre de 1 fr. par mille ; dix ne vont pas jusqu'à 2 fr. ; quatre seulement les ont élevés jusqu'à 3 fr. ; dans le nombre des neuf autres qui composent la dernière catégorie, pour l'exagération des frais, M. A... se trouve au second rang, puisqu'ils se sont élevés à 5 fr. 06 c.

« Vous terminez votre lettre, M. le préfet, en me demandant de vous faire connaître la situation *actuelle* de sa perception.

« Son arriéré sur 1843 est de . . . . . 546 fr. 66 c.

« Sur 1844, de . . . . . 1,100 26

« Je porte un mois seulement de 1845. . . . . 3,156 75

---

10,803 fr. 67 c.

« Tel est le total de l'arriéré à ce jour, soit près de trois douzièmes et demi, qui, dans quelques jours, va être augmenté d'un nouveau douzième, si ce percepteur n'apporte pas le versement qui aurait dû être effectué.

« P.-S. — J'ai attendu jusqu'à ce jour pour vous faire parvenir ma réponse, parce que M. A... promettait, dans la lettre qu'il vous a écrite, d'améliorer sa situation à son premier versement. Ce versement, qui aurait dû être effectué depuis plusieurs jours, a eu lieu le 14 ; il est de . . . . . 1,853 fr.

« Mais comme dans trois jours il faudra ajouter à l'arriéré un nouveau douzième de . . . . . 3,156 fr.

« Cette situation, qui devait être améliorée devient au contraire plus défavorable par un nouvel arriéré de . . . . . 1,303 fr.

« Ce qui porte l'arriéré total à quatre douzièmes au 28 février.

« Tel est l'effet ordinaire des promesses de M. A.... ; ci joint la lettre de ce percepteur. »

Après la lecture des pièces ci-dessus, quel est l'homme raisonnable qui croira que M. A... mérite de l'avancement, et que la recette générale s'oppose à ce qu'il en ait ?

---

#### *Note n° 2 concernant M. B.*

Le 3 novembre 1840, M. le préfet écrivit ci-après à M. Bricogne :

« J'ai l'honneur de vous adresser en communication une lettre du maire de la commune de ... qui contient des plaintes très graves contre le sieur B..., percepteur et receveur municipal de cette commune. Je vous prie d'appeler auprès de vous ce comptable, de lui demander des explications sur les faits qu'elle renferme, et de me la renvoyer ensuite avec sa réponse et vos observations. »

Voici la réponse de M. Bricogne :

« Vous m'avez communiqué, le 3 de ce mois, une lettre de M. le maire de la commune de ... contenant des plaintes très graves contre

le sieur B..., percepteur et receveur municipal de la réunion de... dont cette commune fait partie.

« Entre autres griefs reprochés à ce comptable, il est accusé d'avoir prélevé ses remises, en qualité de receveur municipal, d'après un taux qui excéderait le taux fixé par l'autorité compétente, conformément aux lois et instructions sur la matière, et d'avoir employé, pour parvenir à ce but, les moyens les plus condamnables. J'ai dû porter mes investigations principalement sur ce fait, et j'ai réuni tous les renseignements qui pouvaient m'éclairer sur cette partie de la gestion du sieur B...

« Ce percepteur succéda en 18... au sieur ... ; à cette époque les remises des percepteurs, en leurs qualités de receveurs municipaux, étaient réglées, comme aujourd'hui encore, jusqu'à la fin de cette année, par décret du 24 août 1812. Ce décret fixait le maximum des remises qui pouvaient être allouées à un percepteur pour le service communal, à 4 p. 100, et à 1 1/2 p. 100 pour les recettes des établissements de bienfaisance. La fixation du taux des remises était déterminée par un arrêté du préfet, rendu d'après la proposition des conseils municipaux exprimés dans une délibération spéciale.

« Lors de l'entrée en fonctions du sieur B..., ces formalités avaient été remplies depuis longtemps; deux arrêtés du préfet, pris avec une connaissance de cause, le 17 janvier 1810 et 12 novembre 1818, avaient fixé les remises du receveur principal de cette commune à 3 1/2, et à 1 1/2 p. 100 pour les recettes des établissements de bienfaisance. Le sieur ..., prédécesseur du sieur B..., avait constamment touché ses remises d'après ce taux; mais M. B... ne jugea pas à propos de s'y conformer, il s'alloua de son autorité privée 5 p. 100 sur toutes les recettes indistinctement, bien que M. le préfet lui-même et les conseils municipaux ne pussent pas dépasser le maximum de 4 p. 100 pour les revenus des communes, et celui de 1 1/2 pour les revenus des établissements de bienfaisance; il a agi ainsi jusques et y compris l'année 1838, pour toutes les communes de sa perception; son influence était telle auprès des membres des conseils municipaux que, pendant longtemps, aucun n'osa réclamer. Si un maire refusait de signer les mandats pour ses remises, il s'adressait à un adjoint plus complaisant ou plus ignorant; il avait le soin, en outre, de ne point exprimer dans ses mandats, qu'il préparait lui-même et que les maires n'avaient plus qu'à signer, sur quel taux il calculait ses remises; c'est de cette manière qu'il échappa pendant si longtemps aux rejets que les conseils municipaux et les conseils de préfecture n'auraient pas manqué de lui imposer, s'ils eussent connu le taux d'après lequel les remises étaient calculées.

« Cependant en 1836, le conseil municipal de l'une de ces communes conçut des soupçons sur la manière dont le sieur B... réglait ses remises, et, par une délibération en forme, il ordonna au receveur de produire un décompte détaillé pour justifier l'article de dépense concernant ses remises. On conçoit aisément quel fut l'embarras du sieur B..., aussi ne se pressa-t-il pas de fournir ce document.

« Cet avertissement ne l'empêcha pas d'agir avec la même irrég-

gularité; l'année, 1837, il eut à subir une même injonction dans son compte de gestion de cette année, et le conseil municipal eut soin de rappeler l'injonction portée sur le compte de l'année précédente, et il commit encore la même exaction sur son compte de 1838, espérant, sans doute lasser la patience des juges de ses comptes; le conseil municipal, ayant une fois découvert cette fraude, ne pouvait plus la tolérer, il notifia ses rejets sur le compte de 1838, en termes de plus en plus sévères.

« Enfin, en 1839, le sieur B... se détermina à obéir à ses trois arrêts, et se chargea en recette dans le compte de cette année, du montant des rejets prononcés sur les trois comptes de 1836, 1837, 1838.

« On devait croire qu'après une leçon aussi sévère ce percepteur serait désormais régulier dans le calcul de ses remises. Il n'en fut pas ainsi, il changea seulement de méthode, il eut recours à une autre ruse pour s'approprier des remises plus fortes que celles qui lui revenaient légitimement.

« Sur la fin de 1839, un nouveau tarif fut arrêté pour le règlement des remises des percepteurs; ce tarif ne dut être mis à exécution qu'à partir de 1840, et seulement sur l'exercice de cette année et des années suivantes, les remises des années antérieures devant continuer d'être réglées selon les règlements antérieurs. Le sieur B..., ayant calculé que le nouveau tarif lui serait plus avantageux que celui auquel il était enfin forcé de se conformer, préleva ses remises, dans son compte de 1839, d'après le tarif de 1840; le conseil municipal ne laissa pas passer cette nouvelle infraction, et il prononça un rejet sur cette partie de son compte.

« Le comptable ne s'y est pas encore conformé, quoique nous soyons à la fin de l'année.

« J'ai interrogé le sieur B... sur ces faits, et je n'ai pu en obtenir que des réponses de bien peu de valeur; il ne pouvait ignorer les instructions qui régissent cette partie de son service, et cependant il m'a répondu qu'il s'était cru suffisamment autorisé à prélever ses remises sur le taux de 5 p. 100 (taux supérieur au maximum fixé par la loi), par le silence des conseillers municipaux sur ses premiers comptes, comme si l'adresse avec laquelle un véritable délit a été commis et caché pouvait le justifier; il m'a dit que mon prédécesseur avait autorisé *verbalement* ce prélèvement. Ce fait est inexact; le receveur général n'avait pas ce droit. Il m'a dit encore qu'il avait réclamé auprès de M. le préfet pour que ses remises fussent portées au taux de 5 p. 100. Cette lettre ne s'est pas trouvée dans le bureau de la préfecture, personne n'en a souvenir; mais quand même elle aurait existé, une simple réclamation peut-elle autoriser un comptable à prélever dans sa caisse l'objet de sa réclamation? Les soins que le percepteur a pris de laisser ignorer, même dans ses comptes, le taux d'après lequel il prélevait ses remises, ne démontrent-ils pas assez qu'il savait bien qu'il agissait irrégulièrement.

« Vous jugerez sans doute, M. le préfet, combien une pareille conduite est condamnable, et je croirais devoir vous proposer la révocation de ce percepteur, s'il ne pouvait invoquer en sa faveur le zèle qu'il a montré lors des dernières élections; en considération

de cette circonstance, je ne vous demanderai que son changement.

« Les faits mentionnés dans la lettre ci-dessus sont attestés par les pièces énumérées ci-après :

Délibération du conseil municipal de la commune de ... du 8 mai 1837, qui réduit les remises que M. B... avait portées en dépense dans son compte de 1836.

Autre délibération du 8 mai 1838 qui ordonne le rejet mentionné ci-dessus et réduit les remises de 1837.

Autre du 12 mai 1839, qui renouvelle les réductions mentionnées précédemment.

Autre du 10 mai 1840, qui rejette l'article de dépense concernant les remises du receveur, attendu qu'elles sont calculées à 5 p. 100 au lie de 3 et demi, et que le receveur a eu l'imprudence d'appuyer son article d'un mandat qui n'est pas signé par le maire, et qui contient au contraire le refus formel de cet administrateur d'ordonnancer la somme demandée par le receveur.

Arrêté du conseil de préfecture du 13 juillet 1837, qui enjoint au receveur de rapporter un décompte de ses remises.

Autre arrêté du 3 août 1838, qui maintient l'injonction ci-dessus.

Autre du 15 février 1839, qui fixe à 3 et demi p. 100 les remises du receveur et force en recette ce dernier de ce qu'il a prélevé de trop sur 1836 et 1837.

Autre du 8 juin 1839, qui enjoint au receveur de justifier, dans le délai de deux mois, qu'il s'est chargé en recette des force-ments mentionnés ci-dessus.

Le receveur ne s'est chargé en recette de ses force-ments que le 31 décembre 1839.

Autre arrêté du 4 juin 1840, qui rejette l'article de dépense des remises du receveur, attendu que ce comptable les a calculées, pour 1839, d'après le tarif qui doit servir de base à partir de l'exercice de 1840.

On voit, par le détail ci-dessus, que M. B... ne s'est exécuté envers la commune de ... qu'à la dernière extrémité. Quant aux autres communes, il a perçu ses droits de remise comme il avait envie de le faire pour celle de ..., et on ne l'a forcé à aucun remboursement.

Malgré tout cela, M. B..., qui avait été envoyé par mesure disciplinaire, dans une perception d'un parcours très difficile, a été nommé récemment dans une perception composée de peu de communes et très rapprochées.

#### *Note n° 3 concernant M. C.*

Ce percepteur a été constamment signalé comme retardataire, négligent et ne tenant pas très bien ses écritures. On peut consulter, à cet égard, les lettres ministérielles des 15 septembre 1832, n° 1646; 17 mars 1835, n° 211; 25 novembre 1835, n° 2322; 16 février 1844, 2 mai 1844 et 13 mars 1845.

Et les rapports de MM. les inspecteurs des finances qui ont parcouru le département, en 1835, 1839, 1840, 1841, 1842 et 1844.

Voilà les percepteurs que M. Roulleaux protège tant, et auquel il sacrifie un vieux et honnête employé.

*Notes sur les percepteurs qui ont reçu de l'avancement.*

*M. D...*

Il a été nommé percepteur surnuméraire le 21 août 1841 ; percepteur à ... (4<sup>e</sup> classe), le 30 novembre 1844 ; percepteur à ... (3<sup>e</sup> classe), le 21 juillet 1845, en dépit des dispositions de l'article 6 de l'ordonnance royale du 31 octobre 1839 (1).

*M. E...*

De la perception de ... (3<sup>e</sup> classe), qui, dans le tableau de classement, donnait un revenu de 1,757 fr., il a été appelé à celle de ... (2<sup>e</sup> classe), portée dans le même tableau pour un revenu de 3,326 fr.

*M. F...*

Il a été nommé percepteur surnuméraire le 22 mars 1842 ; percepteur à ... (4<sup>e</sup> classe), le 20 novembre 1844 ; percepteur à ... (3<sup>e</sup> classe), le 30 novembre 1845, en dépit des dispositions de l'article 6 de l'ordonnance royale du 31 octobre 1839.

*M. G...*

Ce percepteur qui était à ... (3<sup>e</sup> classe), porté au tableau de classement pour un revenu de 1,667 fr., a été nommé le 21 juillet 1845 à celle de ... (2<sup>e</sup> classe) porté sur le même tableau pour un revenu de 2,511 fr.

Ce sont quatre bons comptables, et on voit clairement, par tous les détails ci-dessus, que, si les trois autres n'ont pas obtenu ce qu'ils désiraient, c'est leur faute et non celle de la recette générale, comme le soutient M. Roulleaux.

J'ajouterai que je suis intimement convaincu que les deux percepteurs désignés par les lettres D. et G. ne me sont point hostiles, et qu'ils m'ont constamment témoigné le plus vif intérêt ; je ne les cite dans ces notes que pour prouver que la recette générale ne s'est jamais opposée à l'avancement des percepteurs.

(1) Aucun percepteur ne pourra obtenir une perception d'une classe supérieure, s'il ne compte trois années d'exercice au moins dans la classe immédiatement inférieure.

S'il survenait des changements dans le produit d'une perception, le percepteur ne serait pas déclassé, et les droits à l'avancement, qu'il devrait au classement de la perception, n'en seraient pas affectés.

---

## II

## EXTRAIT

Folio 194

DES REGISTRES DES ACTES DE L'ÉTAT CIVIL DE LA  
COMMUNE DE S<sup>t</sup>-HIPPOLYTE-DU-FORT (GARD).

B

*Année 1776.*

Louis-Auguste -  
Simon Comte.

L'an mil sep cent soixante seize et le dix  
neuf août a été baptisé Louis Auguste Simon  
Comte, fils légitime de sieur Simon Comte,  
contrôleur et de d<sup>lle</sup> Jeanne Abrie, né le dix  
sept du courant. Son parrain a été Simon Louis  
Blanchard, maître-d'hôtel de M<sup>r</sup> l'Evêque de  
Montpellier, absent, représenté par sieur An-  
toine Abrie, son grand-père; sa marraine  
D<sup>me</sup> Françoise Abrie d'Alengri sa tante; signée  
avec nous et le représentant. Le père absent.

Signés : ABRIE, ABRIE D'ALENGRI,  
DELOBE, curé.

Pour copie conforme :

Délivré sur papier libre à titre de simple  
renseignement.

S<sup>t</sup>-Hippolyte, le vingt-sept novembre 1894.

*Pr le Maire,*  
AUGUSTE JOUSSEU, adj.

DÉPARTEMENT  
DE L'HÉRAULT

MAIRIE  
DE  
MONTPELLIER

BUREAU  
DE  
L'ÉTAT CIVIL

Décès  
N° de l'Acte 650

Louis Auguste  
Comte  
82 ans,  
veuf Boyer.

## III

EXTRAIT DES REGISTRES DE L'ÉTAT CIVIL DE LA  
VILLE DE MONTPELLIER (HÉRAULT).

L'acte de décès de Louis Auguste Comte,  
ancien fondé de pouvoirs du Receveur général  
de l'Hérault, âgé de 82 ans, né à S<sup>t</sup>-Hippo-  
lyte (Gard), domicilié à Montpellier, décédé à  
Montpellier, le dix juin mil huit cent cinquante  
neuf, dans la maison Cellières, rue Fournarie.

A été inscrit le même jour sur les registres  
de l'état-civil de cette ville.

Le présent a été délivré gratis sur papier  
libre à titre de renseignement administratif.

Montpellier, le 30 mai 1894.

*L'officier de l'état civil,*  
Signé : P. SIERAN.



## IV

## LETTRE D'AUGUSTE COMTE A SON PÈRE.

(Copie conforme.)

Paris, le jeudi soir 17 mai 1832.

Mon cher père,

Dans sa dernière lettre (du 24 avril) maman a cru devoir renouveler les instances qu'elle m'avait faites dans sa lettre précédente pour me déterminer à venir *seul* passer auprès de vous le tems du choléra de Paris. Je croyais que les observations énergiques dont j'avais appuyé mon refus de cette proposition. dans une lettre du 13 avril m'évitieraient la reproduct. d'une offre aussi déplorablement inconvenante. Je suis bien fâché d'avoir été trompé dans cet espoir, et c'est ce qui me détermine à m'adresser à toi personnellement pour t'exprimer à ce sujet ma déclaration décisive et bien arrêtée.

Quoique l'intention de maman soit on ne peut plus formellement exprimée dans 2 lettres consécutives, dont la dernière est particul' caractéristique après les représent. que j'avais adressées et qui n'y sont pas même mentionnés, j'avoue que j'ai encore bien de la peine à comprendre comment une personne aussi *religieuse* que ma mère a pu faire et réitérer une proposition. aussi *immorale* (je ne crains pas de le dire) que celle adressée à un mari de fuir seul la maladie qui a si cruellement désolé cette ville en laissant sa femme s'en tirer, sans ressources aucunes, comme elle le pourrait. Je me félicite particul' de n'être nullement religieux, si c'est à une telle *morale* que doit aboutir la religion dans la pratique. Que dirait maman si en pareil cas je t'engageais à te réfugier ici et à l'abandonner seule dans une ville affectée d'épidémie meurtrière. Il faut que la haine si injustement contractée par ma famille envers ma femme soit bien profonde et bien aveugle pour avoir pu conduire à une démarche aussi scandaleuse et pour qu'on ait pu croire un instant que je consentirais à participer à un acte d'égoïsme aussi révoltant ! Quoi ! si je vivais avec un simple ami auquel je parusse tenir beaucoup et que vous missiez quelque importance à me déterminer à quitter Paris en un tel moment, vous n'auriez pas hésité, j'en suis certain, à m'engager à l'amener avec moi, si vous aviez cru que cette considération put me décider, et quand il s'agit de ma femme, de l'être qui est pour moi plus que tout autre être au monde, et que le devoir et la reconnaissance me tient non

moins que l'affection, ma mère n'hésite pas à me proposer aussi clair<sup>t</sup> que possible de la laisser sans doute à la garde de Dieu, comme disent les prêtres; et lorsque j'ai fait expressément remarquer avec une fermeté modérée (qui aurait permis le... *(Illisible)*) l'inconvenance et l'immoralité d'une telle proposition, je reçois pour toute réponse le renouv<sup>t</sup> des mêmes instances sans qu'il soit plus question de mes remontrances que si je n'eusse rien dit ! Voilà ce qui, je le répète, bien que trop malh<sup>t</sup> constaté, me paraît, je l'avoue, d'autant plus inconv<sup>t</sup> que j'y réfléchis davantage. J'aimerais à me persuader que ce procédé t'est absolument étranger ; mais je ne puis croire cep<sup>t</sup> que maman se fut permise, sans ton autorisation, une aussi grave démarche. Il paraît même qu'elle n'a pas fait mystère aux étrangers d'une telle conduite, car j'ai su indir. que le jeune Dr Coste (ami de M. Delpech, duquel il le tient sans doute) avait eu connaissance des très-vives instances de ma famille pour m'attirer à Montp. pendant le choléra. Outre l'inconv. prof. d'un tel éclat, auquel je suis certain que tu es pers. étranger, il est singulier que maman n'ait pas craint d'être taxée pour son compte de gasconnades maternelles en insistant pour une prop. que tout homme raisonnable sentait fort bien que je ne pouvais pas accepter, même quand je l'aurais voulu. Il est tems que tout cela finisse, et puisque je n'ai pas d'autre moyen de le faire cesser, je dois te déclarer positiv. que mon intention bien arrêtée est de ne jamais revenir à Montpellier et dans ma famille autrement qu'avec ma femme. Suis-je enfin pour vous un homme marié ou non ? ou je serai traité en conséquence, ou nous cesserons toute espèce de relation. Je suis décidé à mettre un terme à toutes ces avances, et à n'être plus tenu en tutelle. Après le tems (trop long sans doute) que j'ai laissé s'écouler, il y aurait de l'hypocrisie de votre part à soutenir encore que votre animosité envers ma femme est fondée sur ses prétendus torts d'autrefois à mon égard. Quand même vous n'en auriez pas personnellement reconnu jadis l'injustice, quand même je ne vous aurais pas détrompé complètement sur des choses dont j'étais seul juge, l'admir. conduite de ma femme pendant ma maladie, et le bonheur domest<sup>e</sup> dont je jouis avec elle depuis les cinq ans qui se sont écoulés déjà après ma guérison, tout cet ensemble suffirait pour démontrer aux plus incrédules et aux plus prévenus que rien ne peut plus excuser votre injuste et opiniâtre animos. à son égard. Si donc il est certain que cette animos. persiste, et ce qui vient de se passer ne me permet malheureusement point d'en douter, ce ne saurait être le moins du monde à cause de moi, et il est bien constaté maintenant que cette haine est ent<sup>t</sup> spontanée de votre part. Cela étant, je me dois à moi-même d'intervenir enfin d'une manière activement énergique, et de prendre comme m'étant personnelles les injures qui sont faites à ma femme, aussi bien de votre part que de toute autre. Je ne sau-

rais sans doute être taxé de précipitation dans une décision où je me reproche au contraire d'avoir mis beaucoup trop de patience et de longanimité. Vous avez toujours su, dès l'origine, que ce ne pouvait être par acquiescement tacite; mais peut-être avez-vous pensé que c'était par faiblesse, tandis que cette résignation provisoire et trop prolongée ne tenait absolument qu'à l'amour de la paix et à l'espoir vivement conçu (quoiqu'à tort, comme l'expérience le prouve) que le tems ferait enfin cesser grad<sup>t</sup> et spout<sup>t</sup> en vous cette haine aveugle et injuste. Il n'en a point été ainsi, et 5 ans écoulés rendent l'expérience suffis<sup>t</sup> prolongée pour que je doive la clorre, sans pouvoir être accusé que d'une modération beaucoup trop grande. Je dois donc cesser toute relation avec ma famille tant qu'un tel état de choses subsistera, et quoiqu'il en coûte inf<sup>t</sup> à mon cœur, ainsi que le prouve le long délai que j'ai supporté, et que tout autre à ma place eut sans doute rendu plus court. Il y a long tems que mes lettres ne sont plus que des bulletins sanitaires, et je ne vois pas là nécessité de les continuer après l'explic<sup>a</sup> décisive à laquelle vient de me forcer une occasion solennelle que je n'ai point à me reprocher d'avoir provoquée. Il sera aisé d'avoir des nouvelles de ma santé par les gens du pays qui vont et viennent, et qui seront toujours reçus chez moi avec plaisir s'ils ont pour ma femme les mêmes égards que pour moi-même, sans quoi je ne souffrirais pas leur visite. Vous devez d'ailleurs être rassurés sur ma santé qui est excellente, puisqu'elle n'a pas été affectée de la cruelle épidémie que nous venons d'éprouver.

Je suis vivement peiné d'avance, mon cher père, du chagrin que te causera certainement, ainsi qu'à ma mère, cette lettre sévère mais indispensable, et je le regrette d'autant plus que je suis persuadé que cette injuste et persévérante animosité envers ma femme ne vous est point naturelle (surtout à toi), et qu'elle tient princip<sup>t</sup> à l'influence que ma sœur exerce sur vous. Mais, spontanée ou suggérée, cette haine n'en est pas moins profondément injuste, et j'en ai attendu la fin avec une longanimité assez prolongée pour que je puisse plus long tems hésiter à y soustraire et ma femme et moi-même, autant du moins qu'il est en mon pouvoir.

Adieu, mon cher père, reçois pour maman et pour toi mille baisers affectueux.

A<sup>te</sup> COMTE.

J'aurais désiré pouvoir écrire la semaine dernière; mes occupations m'en ont empêché.

---

## V

## LETTRE D'AUGUSTE COMTE A SON PÈRE.

*Copie essentiellement conforme quoiqu'écrite seulement de mémoire le soir même.*

*(A mon père.)*

Paris, le mardi 2 juin 1846.

Mon très cher père,

Une lettre de ma cousine Victorine Boyer vient de m'apprendre tout-à-l'heure l'iniquité récemment tombée sur toi, et que je n'aurais jamais jugée possible. Quoique je n'en connaisse encore ni les détails ni les prétextes, j'éprouve le besoin, malgré nos pénibles dissentiments, de te témoigner aussitôt, au milieu de mes profonds chagrins et de mes graves embarras propres, combien je suis affligé et indigné de te voir, après quarante-cinq ans d'un irréprochable exercice, privé des fonctions que tu avais toujours honorées, de manière à mériter qu'elles ne cessassent jamais sans toi. Ma cousine m'informe que tu as supporté avec un noble calme ce coup imprévu, et j'espère que la pleine conviction, si généralement partagée autour de toi, d'avoir constamment rempli tous tes devoirs, soutiendra assez ta juste fermeté pour que cet ébranlement ne porte à ta santé aucune nouvelle atteinte. Une équivalente iniquité m'a privé moi-même, depuis deux ans, comme tu le sais, sans doute, de ma principale position polytechnique, quoique j'aie tout lieu de penser qu'elle me sera prochainement rendue; mais tu croiras, j'espère, sans difficulté que l'indignité dont je viens d'être informé m'affecte beaucoup plus que celle dont je suis momentanément la victime personnelle. Je regrette vivement que ma position actuelle, et surtout le douloureux état de nos relations mutuelles, ne me permettent pas de venir bientôt témoigner respectueusement à mon cher et digne père la part filiale que je prends à son malheur et mon vif désir de l'adoucir autant qu'il serait en mon pouvoir.

Ton fils dévoué,

A<sup>te</sup> COMTE.

Je n'ai pas encore vu M. Captier depuis son retour du midi. Mais j'espère bientôt obtenir de lui tous les renseignements essentiels sur cette énormité imprévue.

---

## VI

## LETTRE D'AUGUSTE COMTE A SON PÈRE ET A SA SŒUR.

*(Copie conforme.)*

Paris, le mercredi 8 mars 1848.

Mon cher et bon père,

Je ne puis résister au bonheur de répondre aussitôt à l'affectueuse lettre qui vient de me surprendre.

L'heureuse démarche dont tu me félicites m'a trop fait goûter l'incalculable douceur des émotions bienveillantes pour me laisser la moindre hésitation sur la touchante ouverture que tu daignes me faire. Oublions donc, avec une pleine franchise, toutes nos longues dissidences, et ne pensons qu'à développer dignement nos saintes affections mutuelles. J'ai noblement commencé, à tous égards, mon second demi-siècle, et j'espère pouvoir encore t'y témoigner long tems ma tendresse filiale. Tu peux compter sur ma visite cordiale en septembre, à moins d'obstacles tout à fait indépendants de ma volonté. Je me félicite que ta constance à supporter l'iniquité t'ait assuré une santé dont j'aurai maintenant des nouvelles plus directes et plus fréquentes par ma bonne cousine ou M. Captier.

Ton fils dévoué,  
Auguste COMTE.

Ma chère sœur,

J'accepte pleinement la réconciliation que tu veux bien me proposer, et je te promets de ne jamais revenir sur le passé. Combien je me félicite que ma sincère manifestation envers M. Arago ait ainsi fourni l'occasion de rétablir mes précieuses relations de famille !

Ton frère,  
Auguste COMTE.

P.-S. — Je dois, une fois pour toutes, vous prier tous deux de ne jamais me solliciter, d'aucune manière, en faveur de M<sup>me</sup> Comte. Celle qui a vécu dix-sept ans auprès de moi sans apprécier (je ne dis pas mon esprit, peu m'importe) mais mon cœur, ne mérite point que je consente jamais à la revoir. Vous pouvez compter que cet arrêt est irrévocable, après six ans de séparation.

Ma seule épouse véritable, celle qui m'inspira une passion toujours

pure, qui ne s'éteindra jamais, se trouve au cimetière Lachaize. C'est-là que, depuis deux ans, je ne laisse pas écouler un seul mercredi sans aller renouveler, sur sa tombe sacrée, les solennelles promesses d'éternel veuvage qui adoucirent ses derniers jours. La fin de cette lettre coïncide exactement avec l'heure accoutumée de ma tendre visite hebdomadaire. C'est à sa sainte image que je dois la première inspiration de l'heureuse résolution dont j'ai aujourd'hui tant de nouveaux motifs de me féliciter. Je vais sur sa pierre répandre de nouvelles larmes de satisfaction et de reconnaissance.

P.-S. Ma santé est excellente.

## VII

### LETTRE D'AUGUSTE COMTE A SA SŒUR.

Paris, le jeudi 16 mars 1848.

Ma chère Sœur,

Dans la précipitation de ma lettre du 8, je crains de ne t'avoir pas manifesté ma sollicitude spéciale pour ta santé, envers laquelle on me donnait quelques inquiétudes. Sans attendre ta réponse, je m'empresse aujourd'hui de réparer spontanément cette distraction involontaire. J'espère que tu me rassureras bientôt sur un sujet qui intéresse tant en lui-même, et qui d'ailleurs doit m'être si précieux pour tes soins continus envers notre bon père, dont l'ensemble de notre position te confie exclusivement la sollicitude. Adieu, je t'embrasse fraternellement, en désirant beaucoup que rien ne vienne empêcher ma cordiale visite de septembre.

Auguste COMTE.

## VIII

### LETTRE D'AUGUSTE COMTE A SA NOURRICE.

*A Madame Françoise Jourdan à Montpellier.*

*(Copie conforme.)*

Paris, le mercredi 13 janvier 1847.

Ma chère Nourrice,

Je vous remercie beaucoup, ainsi que votre mari, du bon souvenir que vous me gardez encore, et je vous prie d'agréer les vœux

que je vous offre en échange de vos souhaits pour la nouvelle année. Puisse-t-elle nous être à tous moins funeste que la précédente !

En vous revoyant à Montpellier, il y a cinq ans, j'ai été très touché de retrouver, après tant de tems, valide et affectueuse celle qui soigna mes premières années. Si je suis maintenant presque inconnu dans ma ville natale, il m'est consolant de penser que quelqu'un s'y souvient cordialement de moi. Quand je serai conduit à y revenir momentanément, je me sentirai toujours heureux de vous y revoir. Cette sorte de liens, si propre à réunir toutes les conditions, mérite, à mes yeux, bien plus de respect qu'on n'a coutume de lui en accorder aujourd'hui.

Recevez, ma chère nourrice, l'expression sincère de mon affectueux souvenir.

Auguste COMTE.

Ma santé longtemps troublée par de profonds chagrins commence à se bien rétablir. Quoique je touche à ma cinquantième année, comme vous devez le savoir mieux que personne, je me sens plus de vigueur d'esprit, de cœur, et même de corps, que trente ans auparavant.

---

## AVIS

Le 5 septembre prochain, l'anniversaire de la mort d'Auguste Comte sera célébré, conformément à la tradition, par un pèlerinage au *Père-Lachaise*, dans la matinée. « Réunion dans le cimetière, au rond-point Casimir-Périer, à 10 h. 1/4. »

A cette occasion, nous nous permettons d'appeler l'attention de nos coreligionnaires sur l'importance qu'il y a, vu les commentaires dont cette cérémonie cultuelle est l'objet dans la presse, à ce qu'ils y participent, en aussi grand nombre que possible.

C. H.

---

# NOUVELLES

---

## UNE APPLICATION ANGLO-AMÉRICAINE

*du Calendrier d'A. Comte.*

On nous écrit de Londres, 14 mai :

« La presse anglaise semble vouloir examiner sérieusement une idée américaine qui avait d'abord prêté à rire, et qui consiste à abandonner notre calendrier astronomique pour adopter un nouveau calendrier exclusivement pratique au point de vue commercial.

« Dans cette nouvelle division du temps, l'année se composerait de treize mois, les douze premiers ayant 28 jours chacun et le treizième en ayant 29 dans les années ordinaires et 30 dans les années bissextiles.

« Selon les partisans américains de ce projet, son grand avantage consiste dans la régularité des jours de la semaine à travers toute l'année. Chaque mois étant composé exactement de quatre semaines, les jours de la semaine se représenteraient toujours aux mêmes dates. A supposer, par exemple, que le 1<sup>er</sup> janvier soit un lundi, les 1<sup>er</sup>, 8, 15 et 22 de chaque mois tomberaient toujours un lundi jusqu'à la fin de l'année. Le mardi reviendrait régulièrement les 2, 9, 16 et 23 du mois. Et ainsi de suite.

« Quelques partisans de ce nouveau mode organisent une série de conférences pour la propagande de leur idée, et il est à prévoir qu'ils rencontreront en Angleterre un certain nombre d'adhérents. Ils comptent également soumettre la question à un grand congrès international qui tiendrait ses assises à Paris pendant l'Exposition de la fin du siècle. »

*Extrait du journal le Temps du 16 mai 1896.*

---

*Le Propriétaire, Gérant responsable : P. LAFITTE.*

---



# PUBLICATIONS DE L'ECOLE POSITIVISTE

En vente aux Bureaux de la REVUE OCCIDENTALE

- JOS. LONCHAMPT.** — *Essai sur la prière*, 3<sup>e</sup> édit., 0,50 c. — *Principes de mécanique générale*, br.
- VERNON LUSHINGTON.** — *Mozart*, London (W. Reeves), 3 d. — *Shakespeare*, 3 d. — *The Worship of Humanity*, 3 d. — *The Day of all the Dead*, 3 d.
- FABIEN MAGNIN.** — *Lettre sur la grève des ouvriers du bâtiment à Londres*, 1862, br. in-8°, 0,75. — *Le Congrès ouvrier de Marseille*, programme et lettre adressés aux organisateurs, 0,15.
- HARRIET MARTINEAU.** — *The Positive Philosophy of Aug. Comte*, translated and condensed, 3<sup>e</sup> édit., London, 1875 (K. Paul et Co), 2 vol., 15 s.
- MEHAY.** — *La théorie atomique et le rôle de l'imagination dans la science*, br. — *Relations numériques entre le volume des corps composés et l'atomicité de leurs éléments*, br.
- DR DE MENDONÇA.** — *Do Espirito positivo*, br. — *Da Nutricão*, Rio-de-Janeiro.
- JOHN G. MILLS.** — *Positivist Prayer*; from the French of J. Lonchampt, New-York.
- CAMILLE MONIER.** — *Exposé populaire du Positivisme*, 0,75 c. — Trad. de LIBANIO DA SILVA, *Precedida de una apresentação por THEOPHILO BRAGA*, Lisbonne, 1892 (Companhia Nacional, Largo do Conde Barão, 57).
- J. COTTER MORISON.** — *Gibbon*, London (Macmillan), 1 vol., 2 s. 6 d. — *Macaulay*, 1 vol., 2 s. 6 d. — *St.-Bernard of Clairvaux*. — *Johan of Arc.* — *The Conception of God.* — *The Relation of Positivism to Art.* — *The Service of Man, an Essay towards the Religion of the Future*, 6 s.
- R. NEWMAN.** — *John Milton*, London (W. Reeves), 2 d.
- DR ANTON NYSTROM.** — *Positivisk Kalender*, Stockholm, 1875, 50 ore. — *Positivistisk Andakts-Bok*, 50 ore. — *Den Gamlartiden infor den nya, positivistiska dialoger*: 1<sup>o</sup> Teologien och Positivismen; Metafyisiken och Positivismen (1875). 1 krona. — *Allmän Kulturhistoria eller det Mänskliga Lifvet i dess Utveckling* (Looström et Komp), vi vol., 43 kr. 50 ore. — *Positivismen*, En systematisk framställning af denna lära, jemte en biografi öfver dess grundläggare A. Comte (1879), 6 kr. — *Samhälliga Tidsfrågor, en följd af folkskrifter* (1879-1881), 20 ore häft. — *Gyldene Ord* ur Mänsklighetens albmänna religion 2: a upple (1881), 25 ore. — *Leon Gambetta, och personlighetens betydelse i politiken* (1883), 40 ore. — *Positivismen och Herb. Spencer eller dr H. Spencers filosofi ett framsteg eller en tillbakagång* (1887), 50 ore. — *Socialismens omöjlighet, etc., jämte praktiska vinkar om arbetarefrågans lösning utan socialism* (1892), 1 kr.
- DR LOUISE NYSTROM.** — *Den Positiva Filosofien*, Stockholm, 1889 (Alb. Bonniers), 1 krona. — *Religionens varende och Mänsklighets begreppel af A. Comte*. 1880.
- J. ODGERS.** — *A positivist Service*, Manchester, 1886.
- HENRI D'OLIER.** — *Table analytique du Système de Politique positive d'Auguste Comte*, 1 fr. 50.
- ALV. JOAQ. DE OLIVEIRA** — *Apontamentos de Chimica*, Rio-de-Janeiro.
- J. W. OVERTON.** — *Saul of Mitre Court a Novel*.
- ANDRÉ POEY** — *Le Positivisme* (G. Baillière), 1 vol., 3 fr. 50 c.

**INTERNACIONAL POLICY.** — *Essays on the Foreign Relations of England*; 2<sup>e</sup> édit., London, 1884 (Chapman and Hall), 2 s. 6 d. Contents : *The West* by Congreve; *England and France* by F. Harrison; *England and the Sea*, by E.-S. Beesly; *England and India* by, E.-H. Pember, *England and China*, by Dr Bridges; *England and Japon*, by Ch.-A. Cookson; *England and the Uncivilised Communities*, by H.-D. Hutton.

**THE POSITIVIST REVIEW**, par E.-S. BEESLY, price Threepence or free by Post Threepence Halfpenny (William Reeves, 185, Fleet Street. E. C. London).

**JULES RIG** (J.-E. RIGOLAGE). — *Résumé de la Philosophie positive d'Auguste Comte*, Paris, 2 vol. in-8° (J.-B. Baillière), 20 fr. — *Uebersetzt von J.-H.-V. Kirchmann*, Heidelberg, 1883 (G. Weiss Verlag).

**D<sup>r</sup> GABRIEL ROBINET.** — *Sur les prétendus dangers présentés par les Cimetières en général*, broch.

**D<sup>r</sup> ROBINET.** — *Notice sur l'Œuvre et sur la Vie d'A. Comte*, 1 vol., 10 fr. — *La Philosophie positive, A. Comte et M. P. Laffitte*. (Alcan), 0,60 c. — *Le Procès des Dantonistes*, 1 vol., 10 fr. — *Danton : mémoire sur sa vie privée*, 1 vol., 6 fr. — *Danton émigre*, 1 vol., 4 fr. — *Danton Homme d'Etat* (Charavay), 1 vol., 10 fr. — *Lettres sur les Animaux*, par George LEROY, 4<sup>e</sup> édit., avec une introduction, 3 fr. 50 (épuisé). — *Condorcet, sa Vie et son Œuvre*, 1 vol. 10 fr.

**SABATIER.** — *Programme d'éducation positive*, 1 vol., 1 fr. 50.

**D<sup>r</sup> L.-A. SEGOND.** — *Histoire et Systématisation générale de la Biologie*, Paris, 1851 (J.-B. Baillière), 1 vol., 2 fr. 50 (épuisé). — *Traité d'Anatomie générale*, 1854 (V. Masson), 1 vol., 6 fr. (épuisé).

**D<sup>r</sup> E. SEMERIE.** — *Des Symptômes intellectuels de la folie*, 2<sup>e</sup> édit., 1 fr. — *La Loi des trois états*, 1 f. — *Théologie et Science*, br., 4<sup>e</sup> éd., (épuisé).

**SOCIÉTÉ POSITIVISTE DE PARIS.** — *Pétition au Conseil municipal contre le Cimetière de Méry-sur-Oise*, 1874, in-4°, 0,10. — *Protestation des électeurs municipaux contre le nouvel emprunt de 120 millions*, 1876, in-4°, 0 10. — *Lettre à M. le Président du Conseil municipal de Paris*, 1878, in-4°, 0,10. — *Adresse au Conseil municipal de Paris pour l'exercice 1878-1880*, in-4°, 0,10. — *Adresse au Conseil municipal de Paris contre le nouveau projet d'ouverture du Cimetière de Méry-sur-Oise*, 1881, 0,10. — *Adresse à Midhat-Pacha, ancien grand-vizir de l'Empire ottoman*, 1877, 0,25. — *Programme pour les élections municipales*, 9 janvier 1881, 0,10. — *Programme pour les élections législatives* (21 août 1881), 0,20.

**D<sup>r</sup> TEIXEIRA DE SOUZA.** — *Calderon de la Barca*, Rio-de-Janeiro, 1881, in-18.

**H. STUPUY.** — *Œuvres philosophiques de Sophie Germain*, avec Notice. 1 vol 3 fr. 50. 2<sup>e</sup> édit. — *L'Orpheline*, 1 acte en vers, 0,50 c.

### Publications de M. Théodore Wechniakoff.

**INTRODUCTION AUX RECHERCHES SUR L'ÉCONOMIE DES TRAVAUX SCIENTIFIQUES ET ESTHÉTIQUES, UNE DES BRANCHES DE L'ENCYCLOPÉDIE ABSTRAITE ET SYNTHÉTIQUE DES SCIENCES ET DES ARTS** (Saint-Petersbourg, 1860, et Paris, 1870), 2 fr. — **RECHERCHES SUR LES CONDITIONS ANTHROPOLOGIQUES DE LA PRODUCTION SCIENTIFIQUE ET ESTHÉTIQUE** : *Partie anthropologique de l'Economie des travaux scientifiques et esthétiques*, 2 fr.; *Groupe philosophique*, 2 fr.; *Contribution à une histoire générale et encyclopédique des sciences considérée au point de vue anthropologique*, (Moscou); *Groupe idéo emotif et sensu-emotif appliqués à la culture originale des sciences et des arts* (Paris, 1873), 2 fr.

### POUR PARAÎTRE PROCHAINEMENT :

Le 3<sup>e</sup> volume **des Grands Types de l'Humanité** ; par M. Pierre LAFFITTE ; comprenant l'appréciation des principaux types de l'évolution catholique (*Saint-Paul, Saint-Augustin, Hildebrand, Saint-Bernard, Bossuet*).

## A PROPOS DU MOT « POSITIF »

---

I. — Un ami qui a été mis par cette Revue au courant des idées de Comte se montrait quelque peu surpris de son choix du mot Positif ou Positiviste. Pourquoi pas Humaniste ? N'y aurait-il pas un autre mot plus convenable, évoquant moins l'idée d'une sèche revendication dogmatique, ou d'un pesant et utilitaire confort, et plus en rapport avec d'idéales aspirations pour le bien de l'espèce humaine ?

Le paradoxe me paraît mériter une explication. Prenons d'abord les acceptions les plus usuelles du mot et examinons ce qui en découle. Il est clair que nous désignons par Positif ce qui est réel, en opposition avec ce qui est imaginaire ou miraculeux. Réel vient d'un mot latin qui veut dire *chose* et s'emploie pour toutes les pensées ayant trait à ce qui est construit avec les matériaux que nous fournit notre propre expérience. Si on nous parle de salamandres vivant dans les flammes, ou d'un homme trouvé en deux endroits au même moment, nous dirons que cela est chimérique. Un homme n'ayant jamais habité que les pays chauds, auquel on parle d'eau solidifiée, croit qu'on le trompe : il n'a jamais vu une telle chose. Pour lui, c'est de la chimère, jusqu'au jour où des affirmations répétées lui tiennent lieu de l'expérience personnelle. On peut dire qu'une grande partie de notre science s'occupe d'abstractions qui ne sont pas réelles, telles que longueur sans largeur, ou longueur et largeur sans profondeur, corps parfaitement rigides, fluides parfaits, et ainsi de suite. Ici, nous prenons un phénomène ou un fait dans un

amas d'autres faits et les examinons, eux et d'autres analogues, pour arriver à découvrir leurs lois : celles de l'espace, du poids, de la chaleur, etc... Quand nous disons qu'une ligne droite est la plus courte distance entre deux points, ou que les deux côtés d'un triangle sont plus longs que le troisième côté, nous parlons évidemment de quelque chose de réel. Bien qu'une ligne droite — au sens strict du mot : longueur sans largeur ni profondeur — n'ait pas d'existence indépendante, c'est cependant un fait réel ou un phénomène qu'on trouve associé avec d'autres et dont on le sépare, ou, comme nous disons, dont on l'abstrait, dans un but de recherches scientifiques. Prenons une brique et considérons tous ses attributs à la fois : longueur, largeur, profondeur, poids, dureté, couleur, conductivité de lumière ou d'électricité, composition chimique, etc.; nous ne découvrirons rien. Toutes ces choses prises à tour de rôle se rattachent, en effet, à tant de branches différentes de la spéculation scientifique ! Chacune de ces branches s'occupe de quelque chose de réel et notre procédé qui consiste à abstraire chacune d'elles tour à tour de l'ensemble dont elle fait partie est un artifice nécessité par la faiblesse de notre puissance intellectuelle.

D'un autre côté, beaucoup de nos abstractions sont fictives et causent une dépense vaine et frivole d'énergie intellectuelle. Ceci provient du besoin d'employer des symboles pour les décrire et du manque d'images pour donner de la vivacité à ces symboles. Quand il s'agit d'un objet concret, d'une brique par exemple, le mot que nous employons n'est naturellement qu'un simple signe ou symbole; mais à ce mot est attachée une peinture mentale ou une image de la chose qui empêche nos pensées de s'en écarter ou de la confondre avec l'ardoise, la tuile ou d'autres matériaux de construction. Mais dans le cas d'un mot abstrait, il n'y a pas d'image pour secourir la faiblesse de notre pensée.

Ici le symbole reste seul, dénué de phénomènes sensibles, comme le sont : poids, composition chimique, couleur, cohésion, etc. C'est en s'occupant des symboles purs et simples que le manque de réalité s'insinue lentement. Quelques exemples le feront comprendre. Dans la grammaire anglaise,

telle qu'on l'enseigne dans nos écoles élémentaires, on apprend aux enfants que dans une phrase comme celle-ci : « L'oiseau construit un nid », le mot « nid » est dans le cas objectif, ce qui constitue une abstraction complètement incompréhensible non seulement pour l'enfant, mais pour toute personne intelligente. Dans les langues inflexionnelles, comme le sont le grec et le latin, ce mot « nid » aurait ici une terminaison spéciale indiquant au lecteur ou à l'auditeur qu'une certaine action doit être accomplie sur lui par l'oiseau. Cette terminaison reçoit très naturellement un nom dans de telles langues : c'est le cas accusatif ou objectif, « cas » voulant dire « accident », quelque chose qui arrive au mot. Etendre cette abstraction à une phrase anglaise, où le mot est absolument immuable, c'est fournir un exemple d'une abstraction fictive, un symbole ne correspondant à rien de symbolisé ; c'est même un exemple particulièrement funeste, parce qu'il est présenté à de très jeunes enfants, en même temps que beaucoup d'autres fictions absurdes et qu'il les habitue à employer des mots n'ayant aucun sens réel.

Toutes les fois que nous employons des symboles sans images, nous sommes exposés à perdre le contact de la réalité. Beaucoup de discussions philosophiques nous rappellent les jongleries que les compagnies de mines pratiquent avec leurs actions sur le Stock Exchange. Les actions ne représentent ni or ni argent, mais simplement l'espoir de les vendre plus cher qu'on ne les a achetées. La plupart des discussions scolastiques et théologiques, soit au moyen âge, soit à notre époque, ne représentent pas la moindre réalité, mais seulement l'espoir de devenir célèbre par une triomphante habileté dialectique. Certains algébristes de notre époque, partant de cette donnée, qu'une équation à trois quantités inconnues,  $x$ ,  $y$ ,  $z$  correspond à la longueur, largeur et profondeur d'une portion de l'espace qu'on doit examiner, s'aviserent d'ajouter une quatrième quantité inconnue pour arriver ainsi à découvrir les propriétés d'une nouvelle sorte d'espace qui devait avoir quatre dimensions, ou n'importe quel nombre. Il était difficile de pousser plus loin la spéculation abstraite. Cependant, tout le domaine de la théologie et de la métaphy-

sique abonde en exemples semblables. Positif signifie donc *réel*.

II. — Le nombre des investigations possibles dans le domaine de la vérité étant infini, et les facultés humaines étant finies, il nous faut choisir celles auxquelles nous accorderons notre attention. Assurément, certaines sont plus importantes que d'autres. Aux premiers temps de l'homme, ceci paraît trop évident pour qu'on prenne seulement la peine d'y réfléchir; toute énergie était alors absorbée par la recherche de la nourriture et par la guerre, soit offensive, soit défensive. Dès que la formation du capital fournit à une classe désœuvrée la possibilité de vivre confortablement sur le travail des autres, sans faire aucune restitution, la moralité mit en tête de ses devoirs d'éviter une telle existence. Une vie de spéculation pure — celle que les penseurs de l'antiquité tenaient pour la plus élevée — force un certain nombre de coupeurs de bois et de porteurs d'eau à occuper leur vie à fournir au philosophe de la nourriture, des habits et un logement. Imposer des entraves légales à ses pensées serait fatal à tout progrès intellectuel. Mais, moralement, le penseur n'en reste pas moins soumis aux mêmes obligations que n'importe quel autre citoyen. Son énergie doit tendre à faire progresser, de la façon qu'il juge la plus convenable, le bonheur de l'homme. Archimède fut enlevé à ses spéculations géométriques pour inventer des appareils militaires propres à la défense de Syracuse. Une fois cela fait, il se remit bien vite à étudier la mesure de la sphère et de la parabole. Mais il savait très bien que ce travail, bien que d'une application immédiate impossible, devait être très important pour les futures générations.

Il est clair que les vérités que l'homme peut vérifier sont infinies, et que certaines d'entre elles valent plus que d'autres la peine d'être approfondies; il y en a même qui ne le méritent pas du tout. Pour commencer par la partie la plus inférieure de l'échelle, on ne saurait limiter le nombre des problèmes possibles en arithmétique et en géométrie. Qui oserait soutenir qu'ils doivent tous être résolus? Il existe peut-être vingt millions d'étoiles accessibles, jusqu'à un certain point, à l'observation humaine. Il serait absurde de dire que

chacune d'elles doit absorber une existence d'astronome. Chaque science offre des exemples analogues de stériles superfluités. La science tend à la généralisation, laquelle permet de prédire tout ce qui se rattache à un certain phénomène, sans l'observer directement. Seulement, si chaque chose devait être consignée et enregistrée au sujet de chaque phénomène pris en particulier, alors le rôle de la science serait terminé. Son essence même est l'élimination des vérités superflues. C'est sur cela que repose, par exemple, tout le système du calcul différentiel. Personne n'aurait jamais pu découvrir la forme de la terre si l'on n'avait négligé les petites irrégularités de la surface, lesquelles ont cependant à un autre point de vue une grande importance, comme chaînes de montagnes. En biologie, on reconnaît actuellement que la distinction entre les genres et les espèces, entre les espèces et les variétés, est moins absolue qu'on ne le supposait autrefois. Comme chaque individu est une variété, la science complète impliquerait une description détaillée de chaque organisme vivant. Un éminent historien me dit un jour ceci : « Avant de pouvoir écrire une histoire parfaite de l'Angleterre, il faut posséder une monographie de l'histoire de chaque village anglais ». Ceci est la réduction à l'absurde de l'histoire. Mais en voici assez. La seconde signification du mot positif est *utile*.

III. — S'occuper des choses réelles et des choses importantes n'est point suffisant ; il faut s'y prendre par la méthode qui conduit au but, afin de n'en dire que ce qui est vrai et certain. Il est bien de cesser de songer aux dieux et aux fées, ou aux « formes substantielles et universelles » de la scolastique ; il est bien d'accorder toute notre attention aux choses de la vie humaine et à ce qui s'y rattache, mais tout cela ne suffit point si nous restons incapables de comprendre ces faits, à cause des nuages obscurs qui les entourent. Donc, jusqu'ici, la période positive de la pensée n'a pas été atteinte. Où en sommes-nous ? A ce point que les résultats de notre expérience nous portent à croire aux lois de la nature, c'est-à-dire à ces règles définies et vérifiables qui gouvernent les choses dans leurs rapports. Mais tant que nous n'aurons pas

établi ces lois dans chaque département de la science, nous ne pourrions faire aucune constatation certaine. La prévision est la pierre de touche de notre certitude scientifique. La connaissance d'une loi naturelle, c'est-à-dire de la manière dont un phénomène dépend d'un autre, nous met à même, si nous observons l'un de ces faits ou phénomènes, de prédire le second sans une observation directe du premier. Dans le cas de la chute des corps, si nous connaissons la loi qui lie le temps à l'espace parcouru, nous pouvons prédire l'un de ces éléments, lorsque nous avons l'autre.

Dans un très grand nombre de questions relatives aux choses réelles, la certitude, telle que nous venons de la définir, nous est refusée. C'est particulièrement le cas dans tout ce qui a rapport aux origines. Nous pouvons expliquer le vent, la marée, les mouvements de la lune et des planètes, par la gravitation. Mais sur quel fait repose la gravitation elle-même ? L'origine des éléments chimiques, l'origine de la vie, l'origine même de la race grecque, toutes ces choses nous sont inaccessibles, en raison de la faiblesse de nos facultés ou de la perte des documents nécessaires, et elles le seront peut-être toujours. Les discussions sur un tel sujet ne peuvent conduire à aucun résultat, car tout cela est en dehors de la portée de la pensée positive. Le troisième sens du mot positif est donc : *certain*.

IV. — L'un des caractères qui différencient le savoir scientifique du savoir commun est non seulement sa certitude, mais aussi sa précision. La science de l'arithmétique nous offre de cela les exemples les plus simples. De deux groupes de brebis ou d'oiseaux, un observateur même inexercé peut être certain que l'un est plus nombreux que l'autre. Mais un observateur expérimenté indiquera plus ou moins exactement la différence précise. Qu'une certaine ville soit plus saine qu'une autre, voilà une certitude acquise par la pratique. Les statisticiens réunissent le nombre de décès, le comparent avec celui de la population, et transforment une assertion assez vague en un chiffre exact. Le progrès scientifique consiste, dans une grande mesure, à transformer les assertions de qualité en assertions de quantité. Un biologiste, par exemple, à



notre époque, ne se contente pas de savoir que le sang est plus chaud à un moment qu'à un autre ; que l'action vitale est accompagnée d'une transformation chimique ; que les sensations se portent rapidement de l'extrémité d'un nerf au cerveau. Il constate la température du sang avec son thermomètre, recherche les composés chimiques en qualité et en quantité, et se rend compte de la vitesse exacte du transport des sensations. De telles recherches peuvent être parfois pratiquées avec fatuité et souvent accumuler des tas d'inutiles détails, de façon à barrer la route à tout progrès : le véritable esprit scientifique se révèle en indiquant ce qu'on doit ignorer aussi bien que ce qu'on doit étudier. Dans toute recherche, il existe un degré de précision convenable qu'on peut atteindre ; c'est à cela que vise l'homme doué du véritable génie scientifique. Les astronomes qui mesurent la forme de la terre négligent ses chaînes de montagnes. Nous avons donc examiné quatre sens du mot positif : réalité, utilité, certitude, précision. Nous allons en étudier trois autres.

V. — En plus des attributs de réalité, d'utilité, de certitude, de précision, la doctrine positive en possède trois autres que nous allons maintenant considérer. Sa cinquième qualité est d'être *organique*. Ce mot exprime deux idées. D'abord, organique est mis en opposition avec ce qui est destructif, désorganisant ; ensuite, avec ce qui est mort, sans mouvement, incapable de changement ou d'accroissement.

Si nous passons en revue les mouvements politiques et religieux des cinq ou six derniers siècles dans le monde occidental, nous constatons qu'une très grande partie de l'activité humaine visait à la démolition des institutions ou des doctrines existant auparavant. Pendant les <sup>xiv</sup><sup>e</sup> et <sup>xv</sup><sup>e</sup> siècles, il y eut des attaques continuelles contre la papauté qui avait précédemment uni les populations de l'Europe occidentale sous un même gouvernement spirituel. La rivalité entre le droit civil et le droit canon se termina par la prédominance graduelle du premier. Les rois s'emparèrent de beaucoup de fonctions qui avaient antérieurement appartenu aux évêques et aux papes. L'esprit national s'affermir et ne toléra plus l'intrusion des prêtres d'une autre race et d'une

autre langue. Des attaques se produisirent partout contre la doctrine centrale du catholicisme, personnifiée par l'Eucharistie. Tout cela marcha d'une manière silencieuse et non systématique jusqu'à l'époque de Luther et de Calvin, où la doctrine de la révolte prit une forme définitive, en même temps que l'Europe se divisait en deux camps hostiles : catholiques et protestants. Après une dépense excessive de forces sociales pendant plus d'un siècle, une trêve intervint au traité de Westphalie. Mais le mouvement destructeur, au lieu de cesser, passa au camp protestant lui-même. L'éloquent traité de Bossuet sur les *Variations du Protestantisme* décrit brillamment ce qui eut lieu. On fit des efforts pour remplacer le gouvernement des prêtres par celui des presbytériens, dans lequel les ecclésiastiques étaient plus ou moins contrôlés par les laïques. Les presbytériens furent attaqués par les indépendants. L'infailibilité de la Bible, qui avait été substituée à l'infailibilité de l'Eglise et des papes, devint l'objectif de la critique. Le jugement privé, qui avait été systématisé par la philosophie de Descartes, fut poussé jusqu'à ses conclusions naturelles par Hobbes et Spinoza. C'est ainsi que, vers la fin du xvii<sup>e</sup> siècle, tout était prêt pour une large diffusion du mouvement sceptique du xviii<sup>e</sup>, sous la direction de Voltaire. Il est inutile de s'appesantir sur la désagrégation politique qui marcha de pair avec la désagrégation de la foi religieuse. La révolte hollandaise, la République anglaise, la République américaine, la Révolution française, sont évidemment les anneaux d'une seule chaîne. D'autres anneaux ont été ajoutés au courant du siècle qui est en train de finir. Aucun article de foi, aucune institution, même très ancienne, chrétienne ou antichrétienne, n'ont échappé à l'assaut.

Il paraîtrait oiseux, dans cette étude, de blâmer ou de louer cette suite critique d'actes destructeurs. Considérée d'un peu haut et sans tenir compte des égarements passagers, nous pouvons constater qu'elle était nécessaire, aux deux sens de ce mot : destinée à se produire fatalement et répondant à un besoin réel. Ce que l'on doit remarquer, c'est que les actes par lesquels la doctrine positive a été édifiée se trouvent complètement en dehors de cette suite critique ou révolutionnaire

et qu'il faut les en séparer soigneusement. La doctrine positive vit le jour lorsque Thalès et Pythagore isolèrent les vérités de l'arithmétique et de la géométrie des arts pratiques auxquels ils étaient incorporés et les considérèrent comme des buts distincts de spéculation. Ce noyau de la vérité positive, élargi par Aristote, Archimède, Hipparque et l'école d'Alexandrie, et transmis par les écoles de Bagdad et de Tolède aux penseurs européens du <sup>xiii</sup><sup>e</sup> siècle, s'est graduellement élargi au milieu des agitations révolutionnaires de l'histoire moderne et s'est adapté à lui-même de nouvelles branches de la science. Il est arrivé enfin, sous l'influence de Comte, en y comprenant celle de ses prédécesseurs et de ses successeurs, à embrasser les faits de la vie sociale et morale de l'homme. Le travail s'est effectué silencieusement, d'une manière continue, et sans chocs. Dire que ses progrès n'ont pas influencé l'évolution des transformations révolutionnaires serait une exagération ; mais il a eu lieu indépendamment de ces transformations et parfois en opposition avec elles.

Dans un autre sens aussi, sens lié au précédent, bien qu'en étant distinct, la doctrine positive est organique ; elle est vivante, non morte, non stéréotypée, non immuable. Mettez en parallèle le corps de vérités qui constitue chaque science avec les dogmes de la croyance Nicéenne ou Athanasienne, avec le catéchisme de Westminster ou les Articles de l'Eglise d'Angleterre. Ceux qui sont fidèles à ces dogmes les exaltent, parce qu'ils ont été transmis de siècle en siècle sans l'altération d'une seule de leurs syllabes. Les deux petits mots qui divisaient la communion grecque et la romaine, au commencement du moyen âge, les divisent encore aujourd'hui. Mais la vérité scientifique est en cours de constante évolution. Croissance n'empêche pas continuité. Aux époques où le changement est le plus rapide et le plus saisissant, l'état le plus ancien est en continuité avec le plus récent. Peu de changements ont été opérés dans la manière de procéder des observatoires d'astronomie, par suite de la découverte de la rotation de la terre et de son mouvement autour du soleil. Les naturalistes se remettent à parler de nouvelles espèces de plantes et d'animaux, absolument comme si Darwin n'avait

jamais émis sa célèbre hypothèse. De même, dans d'autres branches de la science, et partout, nous trouvons cette évolution régulière, ce changement organique, qui contrastent tant avec les oscillations sans fin de la controverse métaphysique ou avec la silencieuse stagnation des dogmes théologiques. Le cardinal Newman a fait, il est vrai, une audacieuse tentative pour appliquer le principe du développement à la doctrine catholique. Il a montré que, pendant quelques siècles, elle fut en croissance. Mais qu'est devenu le catholicisme depuis le concile de Trente ?

VI. — J'arrive à la sixième caractéristique de la vérité positive. Elle est *relative*, non *absolue*. On nous enseigne cela très clairement dans nos études de l'arithmétique. 1 par rapport à 2 est tout à fait différent de 1 par rapport à 4, à 8, etc... Si l'on continue à augmenter le second terme du rapport jusqu'à le rendre infiniment grand, l'importance du premier terme devient infiniment petite, en réalité égale à 0 (1).

En arithmétique, rien n'est absolument grand, ni petit : tout est relatif. Une haute tour n'égale pas une basse colline ; une large rue ne ferait qu'une étroite rivière. La distance de Londres à Melbourne est grande, relativement aux distances entre les villes de notre île ; elle est petite relativement à la distance qui sépare la terre de la lune, laquelle est à son tour négligeable comparée à notre éloignement du soleil, ce dernier n'étant qu'une petite fraction de l'espace qui sépare le soleil de l'étoile la plus rapprochée. Des mots tels que : en haut, en bas, s'appliquent, pour les différentes populations qui les emploient, à différentes parties du ciel. L'astronomie nous montre tout cela d'une manière frappante dans le cas du mouvement, dont le seul sens intelligible est la variation de position par rapport à un autre point. Sur le pont d'un navire marchant à 4 nœuds à l'heure du sud au nord, un passager marchant à la même vitesse du nord au

(1) M. Bridges a sans doute voulu dire que le rapport lui-même s'annule, et non le premier terme, puisqu'il ne le fait pas varier. En effet,  $\frac{1}{l'infini}$  ou  $\frac{1}{\infty} = 0$ .

(Note du traducteur).

sud ne bouge pas par rapport aux objets situés sur le rivage le long duquel court le navire. Cependant, absolument parlant, ni la côte, ni le bateau, ni le passager, ne sont au repos. Tous participent également de la rotation de la terre et de son mouvement orbital; sans parler du mouvement propre du soleil, ni du mouvement du point central autour duquel — et encore, le sait-on ? — il peut se mouvoir.

En physique, le mot force, considéré en lui-même d'une manière absolue, n'a aucune signification. Nous ne pouvons le concevoir que dans l'action et la réaction de deux corps. La gravitation, l'électricité, le magnétisme, la chaleur, l'affinité chimique, toutes ces choses impliquent un rapport, une relation. Quand nous arrivons à la science des corps vivants, la relativité de tous les phénomènes que nous examinons devient même plus évidente. La vie consiste dans l'action et la réaction mutuelles de l'organisme et du milieu. Le brin d'herbe est incompréhensible sans la connaissance de l'action de l'air et de la lumière sur ses cellules vertes, de l'eau et des sels alcalins avec lesquels les fibrilles de ses racines viennent en contact. La vie plus élevée d'un oiseau ou d'une bête implique la perception de choses lointaines et d'organes contractiles pour se mettre en contact intime avec elles. Le terme même employé par Bichat pour décrire ce genre de vie — la vie de relation — indique nettement le fait que l'existence absolument indépendante n'est qu'une fiction.

Si nous passons de la vie individuelle à la vie politique des nations, nous sommes à même de voir plus clairement la signification de cette conception de la relativité. En jugeant telle ou telle action historique, nous devons tenir compte de l'état de civilisation atteint par l'homme d'Etat ou la nation qui l'a accomplie. La conquête de la Gaule par César, faite à une époque où la guerre était la principale occupation humaine, ne doit pas être appréciée au même point de vue que pourraient l'être les attaques du premier Napoléon contre l'Allemagne, ou de l'Angleterre contre l'Inde ou l'Afrique, faites à une époque où l'industrie pacifique est reconnue comme la condition essentielle de tout progrès politique. Les constitutions idéales, comme celles que les théoriciens de la

Révolution française et des époques postérieures ont pensé pouvoir être appliquées à chaque phase de la société, se sont révélées comme de nuisibles fictions.

Les nègres de la République de Libéria ou les habitants des Iles Sandwich ne deviendraient pas meilleurs — probablement même ils deviendraient pires — sous des constitutions établies sur le modèle de celle des Etats-Unis. Il existe une relation définie entre un certain état de civilisation et les institutions politiques qui lui sont adaptées ; c'est l'affaire de l'homme d'Etat pratique de découvrir cette relation. Nous voyons ainsi que, dans toutes les branches de la pensée positive, la doctrine est *relative* et non absolue.

VII. — Aristote nous a dit il y a longtemps que toute activité intellectuelle et morale (tout « art » et toute « méthode », pour employer ses propres expressions) tend à un certain but qui est le bien principal. Nous pouvons demander, comme il le faisait lui-même, quel est ce bien le plus important, quelle est la forme la plus élevée du bonheur ? Nous trouverons difficilement une meilleure réponse que la sienne : une vie de noble activité. Dans notre monde tourmenté, avec ses luttes, ses rivalités, ses animosités amères, ses buts opposés, comment peut-on mener une semblable vie ? Parmi les conditions à remplir, il en existe deux qui paraissent être essentielles. D'abord, l'activité guerrière, cause de conquête et de pouvoir despotique d'une part, de sujétion et d'esclavage d'autre part, doit céder la place à l'activité industrielle, au développement pacifique des ressources de notre planète, activité où les hommes pourront un jour se coudoyer sans conflit. Ensuite, les convictions des hommes sur les questions les plus élevées doivent être basées, non sur des révélations supernaturelles maintenues par d'instables fascinations personnelles ou des préjugés antiques, mais sur la démonstration scientifique s'introduisant spontanément et sûrement dans tout esprit sain. Ces deux conditions marchent de pair et proviennent de la même source. Les hommes qui les rempliront verront leurs existences devenir convergentes et harmonieuses. Les positivistes paraissent étranges et paradoxaux quand ils disent que l'existence de l'homme tend à devenir de plus en plus religieuse.

C'est cependant bien vrai si nous donnons son vrai sens au mot religion ; c'est-à-dire si nous la regardons comme l'état dans lequel l'homme pense et agit en paix avec lui-même et avec ses semblables, l'état d'Unité au dedans et d'Union au dehors.

Serait-il possible que, dans la science, on trouvât des principes qui puissent régler moralement la vie humaine, et qui puissent se comparer aux vérités primitives prêchées par les prêtres et les prophètes des temps passés ? Oui, il existe de tels principes ; c'est dans l'étude scientifique de la nature humaine qu'on les trouve. Les théologiens nous ont dit que notre nature est entièrement corrompue. La science positive démontre le contraire. Nous devons remercier le grand sceptique Hume d'avoir été parmi les premiers à poser les bases de la moralité positive quand il démontra que l'affection altruiste était un élément spontané de la nature humaine. Georges Leroy confirma cette vérité en montrant que l'homme partage ces émotions altruistes avec les animaux élevés. A ces aperçus, Gall ajouta une précision définitive en distinguant chez l'animal comme chez l'homme les trois impulsions distinctes de vénération, pitié et amour individuel.

Dès lors, un aspect entièrement nouveau était donné au caractère de la doctrine positive.

Elle se présente maintenant non seulement comme un centre de matériaux solides et utiles, mais elle indique les moyens par lesquels l'action et l'intelligence de l'homme, les sentiments de la vie privée et publique, peuvent se coordonner, de manière à acquérir cette noble activité qu'Aristote reconnaissait comme le but suprême. En d'autres termes, tout ce que nous voulons exprimer par des mots tels que : art, poésie, religion, aspirations vers une vie plus élevée pour nous-mêmes et ceux qui nous entourent, tombe sous l'influence de la doctrine positive. La lutte pour devenir plus parfaits, les efforts en faveur des autres, voilà des buts aussi réels, aussi utiles, aussi susceptibles d'être atteints par des procédés certains et définis que la construction d'un almanach nautique, d'un navire à vapeur ou d'une manufacture. Ces buts visent plus directement à la consolidation de la vie humaine ; ils sont plus

durables; on peut dire plus véritablement qu'ils sont plus réels. Qui se souvient de ces interminables séries de guerres mesquines et d'ambitions frivoles provoquées par tel chercheur de trône? Tout cela est passé! Mais les poèmes d'Homère et d'Eschyle, l'histoire des évangiles, le sublime héroïsme de Jeanne d'Arc, le courage civique de Milton ou de Washington : voilà qui dure encore! Qu'on connaisse ces noms ou qu'on les ignore, notre vie est bâtie dessus. La doctrine positive est non seulement réelle, utile, certaine, définie : elle est sympathique. Elle élève l'homme au-dessus de lui-même — jusqu'à le mettre en communion avec cette Humanité par laquelle nous vivons, pour laquelle nous travaillons. J.-H. BRIDGES.

(Traduit de la « **Positivist Review** » du 15 Charlemagne et du 18 Dante 108, par A. RICHER )

---



# LE CENTENAIRE DE BURNS

---

DISCOURS PRONONCÉ A NEWTON HALL

le 22 mars 1896, par VERNON LUSHINGTON

Dans les rues les plus populeuses, dans les vallons les plus solitaires,  
Sont ressenties les étincelles de son génie ;  
Il règne parmi les neiges de l'hiver, et aussi dans le temps  
Où les abeilles remplissent leurs ruches ;  
Profondément, dans le cœur des hommes  
Son pouvoir est toujours vivant.

(WORDSWORTH, 1803.)

Nous sommes réunis ce soir pour honorer le poète Robert Burns, qui naquit en 1759 et mourut, il y a juste un siècle, à l'âge précoce de 37 ans.

Vous l'aimez déjà, je le sais, et pour de bonnes raisons. Vous aimez au moins quelques-uns de ses meilleurs chants. Vous vous rappelez : « *My love is like a red red rose* », « *John Anderson my Jo* », « *Duncan Gray* » ou « *Auld Lang Syne* », et vous songez au plaisir que vous ont fait ces morceaux. C'est là la meilleure manière de connaître. Notre programme musical a été composé de façon à faire ressortir, en une autre et délicieuse manière, le caractère et les œuvres de notre poète. Je ne puis donc que vous présenter quelques idées générales et sympathiques et vous indiquer, avec un peu plus de détails, le beau et courageux rôle, joué à son époque par ce poète qui est votre bienfaiteur et votre ami, en charmant non pas l'Ecosse seule, mais l'Humanité tout entière.

Parlons donc de la *race* dont notre poète est sorti. Pendant

les cent cinquante dernières années, l'Ecosse a présenté un phénomène des plus remarquables. Contrée montagneuse reculée dans les profondeurs de la mer du Nord, l'Ecosse ne prit, au moyen âge, qu'une assez faible part à la civilisation catholique et féodale. Mais, après le mouvement de la Réforme et l'union politique avec l'Angleterre, les hardis enfants de l'Ecosse se levèrent et commencèrent, soit comme familles, soit comme simples individus, leur marche pacifique vers le sud. Le Dr Johnson les vit traverser la frontière et en taquina quelques-uns, mais ils n'y firent guère attention. Vers l'Angleterre ils allèrent et, dans toutes ses villes et bourgs, ils entrèrent et s'établirent ; et, par delà les mers, aux colonies, en Amérique et en Australie, ils firent route, emportant avec eux quelque chose de leur foi solide et de leurs rudes manières. Si, alors, vous aviez percé ce plancher et à travers le centre du globe vous étiez transportés jusqu'aux Antipodes, c'est-à-dire en Nouvelle-Zélande, vous auriez pu vous trouver au milieu d'une famille écossaise, et non seulement écossaise mais peut-être presbytérienne, et lisant certainement leur Burns, sinon d'autre livre. Et partout, en tout lieu comme dans leur patrie, les Ecossais furent heureux et victorieux, dans les professions manuelles et libérales, dans tous les ordres de science et dans tous les genres d'industrie. Dans le travail moderne, ils ont été et sont encore aux premiers rangs ; dans le domaine de l'esprit, ils ont dépassé Calvin et John Knox et se sont rapidement établis aux premières places de la pensée européenne. Au siècle dernier, l'Ecosse produisit toute une école d'historiens et de philosophes avancés, une école qu'illustrèrent les noms de Hume, Adam Smith, Fergusson, Robertson, qui tous firent progresser l'étude positive de la nature et de la société humaines, et qui, pour leurs services, sont légitimement placés dans notre Calendrier positiviste. C'est alors que naquit, dans le comté d'Ayr, notre poète bien aimé ; et, dans ce siècle même, les basses terres d'Ecosse ont encore donné à la littérature de l'Humanité deux noms qui ont fait le tour du monde : Walter Scott et Thomas Carlyle, — Carlyle, dont l'une des premières productions se trouve être l'appréciation de Burns la plus élevée et la plus vraie que nous possé-

dions. Ce sont de nobles titres ou plutôt c'est une riche préparation pour la civilisation plus harmonieuse — et si nécessaire — que nous attendons. Pourtant cela est déjà grand. Je ne veux point chercher à expliquer ce singulier et étonnant succès des Ecossais, je dirai simplement que ce succès démontre l'existence d'un fond de premier ordre dans leur caractère. De cette race était Robert Burns : lui aussi fut audacieux, lui aussi fut victorieux, mais par ses propres armes spirituelles. Si je ne puis réclamer pour lui une part entière de la solide persévérance de ses concitoyens — le « Je m'y tiens » —, il en fut dédommagé en recevant en partage une dose héroïque de leur « ardent génie ».

Pour faire ressortir l'énergie de l'Ecossais, j'ai insisté sur ses entreprises colonisatrices ; mais il n'est pas moins vrai — conciliez cela comme vous pourrez — que les Ecossais aiment leur terre natale par dessus tout. Walter Scott en est témoin. Burns aussi : relisez seulement sa belle « *Vision* ».

Cela nous amène à considérer la *maison* du poète, qui fut, dans son cas particulier, une influence prépondérante. Pour lui, bien plus que pour les poètes nés dans les villes qui l'ont précédé, la terre, le ciel, les vicissitudes des saisons eurent une énorme importance. Il vécut au milieu de toutes ces choses, il les aima et, nouveauté pour ses contemporains, il les chanta, mais toujours, et c'est ce qui montre sa grandeur, en les subordonnant à l'homme. Il ressentait également ce qu'il y avait en elles de sévère et de tendre ; il prenait une sorte de plaisir aux tempêtes sauvages de l'hiver comme aux charmes gracieux du printemps — peut-être surtout, comme Shelley, parce qu'ils paraissaient symboliser l'énergie révolutionnaire. En tout cas, il vécut en leur compagnie, dans son Ayrshire natal. Ce pays descend vers l'Ouest en pentes raides des montagnes de l'Ecosse méridionale jusqu'à l'embouchure de la Clyde ; c'est une contrée accidentée, en grande partie couverte de bruyères et de marécages, à population encore clairsemée et ne possédant ni grande cité ni ville de quelque importance. Le paysage est d'une beauté sauvage, tout en collines et vallées, rochers et rivières ; mais, aux approches de la mer, il y a des pacages étendus, des terres de labour avec

des prairies et des bois délicieux longeant la rivière. C'est là, sur les bords de l'Ayr et de l'aimable Doon que Burns passa les premières années de sa vie. Grâce au ciel et au Dr Blacklock, le poète aveugle, il ne partit pas pour la Jamaïque, il ne devint pas un surveillant d'esclaves noirs. Ses dernières années s'écoulèrent dans la vallée voisine du Nith et surtout dans la petite ville de Dumfries où il repose maintenant. Né dans une hutte d'argile, bâtie des propres mains de son père, un laboureur de ferme ou un pauvre petit fermier, ensuite, pendant huit ans jaugeur-juré ou sous-percepteur des douanes, pendant les cinq derniers parmi les commerçants d'une petite ville, avec des appointements, dit-on, de 90 livres par an, telle fut sa modeste condition sociale pendant qu'il vécut au milieu des hommes. Telle fut aussi celle de la plupart de ses compagnons ordinaires, quoique, dans sa visite à Edimbourg, après la triomphante publication de ses poèmes en 1786, il ait fait alors la connaissance de quelques grands personnages et des principaux *leaders* de l'opinion littéraire, ce qui ne l'empêcha pas de maintenir fièrement — tout à fait fièrement — sa dignité vis-à-vis des plus huppés. Ces relations lui vinrent en aide et de bien des façons, mais je doute qu'elles aient eu sur son esprit autant d'influence que Dick Brown, le matelot, ou que les contrebandiers qu'il fréquenta dans sa jeunesse, ces courageux et désordonnés gaillards, ces buveurs émérites, ou les joyeux vagabonds qu'il avait rencontrés dans la brasserie de village de Nancy-Poosie à Mauchline.

Si vous demandez quels furent, de tous les personnages parmi lesquels il vivait, ceux auxquels il doit le plus, je nommerai, après son admirable père, sa nourrice Betty Davidson, qui lui apprit les contes de fées et fut certainement la marraine de son délicieux *Tam O'Shanter* et de beaucoup d'autres. Le meilleur de ses patrons fut Robert Aiken, un écrivain au cachet, duquel Burns a dit : « A force de lire en public mes poèmes, il me conduisit à la renommée ». C'étaient là ses amis vivants ; parmi les morts je citerai seulement les poètes, ses précurseurs immédiats, Allan Ramsay et Fergusson. Il fut toujours pour eux plein d'une noble gratitude et, sur la tombe de Fergusson, à Edimbourg, il fit ériger un monument en pierre.

En jetant un regard en arrière sur les côtés humbles de la vie de notre poète, je n'exprimerai qu'un seul regret, qu'un seul désir. Pourquoi la petite ferme d'Ellisland n'a-t-elle pas mieux réussi ? Que n'a-t-il pu éviter de devenir jaugeur ! Mais tous ces regrets sont bien stériles !

Examinons maintenant les influences spirituelles d'un caractère plus général qui l'environnèrent enfant, adolescent et homme fait. Burns ne connut que très peu l'époque lointaine du moyen âge, à peine en eut-il quelque conscience ; il fut essentiellement un esprit moderne, bien plus, un esprit moderne du type révolutionnaire, et nécessairement peu instruit. A l'encontre de plus d'un révolutionnaire, il ne connut guère des sciences qu'un peu de mathématiques ; il n'avait aucune idée de l'office général de la science dans la croyance de l'homme ; et, comme ses frères, il se souciait peu des beaux-arts et, surtout, comme eux, la connaissance et le goût de l'histoire lui faisaient complètement défaut : peut-être la regardait-il comme un simple enregistrement des actions des méchants, des tyrans et de leurs pareils. En réalité, il ne connaissait que très peu ses héros ; il ignorait quel roi anglais se trouvait à Bannockburn, il croyait que c'était Edouard I<sup>er</sup>. Nous pouvons être certains qu'il n'avait jamais médité sur le récit de la mort de Robert Bruce dans Froissart, cette parfaite peinture embellie de toute la grâce romanesque de la Chevalerie — certainement non ! — quoiqu'il se soit agenouillé un jour sur la tombe de Bruce dans la cathédrale de Dunfermline. Même les ruines grises des gracieuses abbayes ou des sévères forteresses, même les belles et chevaleresques ballades de son pays natal, dont l'étude devait plus tard être si captivante et produire un changement si profond dans les idées, les sentiments et les actes mêmes, toutes ces choses le laissaient froid. Qui s'y intéressait alors, en dehors de l'excellent D<sup>r</sup> Percy ? Burns regardait autour de lui, en avant de lui, fort peu en arrière. En arrière c'était l'Eglise catholique — tyran géant, vaincu et décrépît, pensait-il — mais ni sa gloire ni sa défaite ne le touchait, il ne connaissait que l'église d'Ecosse. Les guerriers chevaleresques, s'il y en eut dans l'Ayrshire, avaient été remplacés depuis longtemps par de

vulgaires propriétaires du type moderne, les uns libéraux et bons, comme son ami Gavin Hamilton ; d'autres qu'il connaissait bien aussi, médiocres et bas, habiles, grâce à leurs stricts intendants et avec l'aide de toutes les formes de la loi, habiles à soutirer le dernier shilling de la poche des pauvres fermiers comme son père. Mais devons-nous dire qu'alors l'esprit du moyen âge, l'esprit catholique et chevaleresque était entièrement mort, entièrement éteint, dans l'Ecosse de ce temps, chez notre poète comme chez ses auditeurs et ses lecteurs ? Non, en vérité ; songez seulement au sentiment de Burns pour les femmes ; ce n'est point là le sentiment du sauvage pour sa *Squaw*. Dans ses meilleurs moments, quand Burns pensait aux femmes, il était tout adoration — pur, respectueux, tendre, heureux et même constant. Ce sentiment, sans qu'il s'en doutât, avait sa source, en grande partie du moins, dans cette habitude du moyen âge, transmise à travers les générations par d'invisibles canaux et qui, maintenant, dans l'âme vraiment moderne de notre poète, était devenue comme une seconde nature. Comte n'eut donc pas tort de le placer dans son Calendrier, au mois de Dante, à la semaine de l'Arioste.

D'ailleurs, qui se préoccupa plus que Burns de la liberté du travailleur ? Et, quand cette liberté fut-elle fondée sinon au moyen âge ? Mais Burns l'ignorait et combien peu s'en doutent encore aujourd'hui !

Vous pouvez de plus supposer que ses sentiments patriotiques, si beaux dans leur forme toute moderne, tiraient quelques-unes de leurs inspirations du passé. Il le dit lui-même ; dès son enfance et jusqu'à ses derniers jours, le nom de Wallace lui était cher, plus cher que tous les autres. Il l'avait appris, ce nom, encore enfant, dans un livre que lui avait prêté son ami, le forgeron du village. Et, à partir de ce moment, ce nom devint pour lui comme un fougueux mot d'ordre pour la « Liberté », bien que sans doute Wallace et lui entendissent des choses fort différentes dans ce mot auguste. Mais, pour vous donner un exemple de ce grand amour pour sa patrie, laissez-moi vous citer ses vers délicieux :

« Alors, encore un seul désir (et je connais son pouvoir)  
Un désir unique qui, jusqu'à ma dernière heure,  
Soulèvera fortement mon cœur ;  
Que je puisse, pour la vieille et chère Ecosse,  
Faire au moins quelque chose d'utile,  
Chanter un chant tout au moins !  
Parmi les tiges d'orge barbu,  
Le chardon poussait dru,  
Mais je détournai ma houe,  
Et je respectai le cher symbole, »

C'est là, en fait, et dans l'ensemble de son caractère, en dépit de quelques aberrations, que se marque l'âme chevaleresque de notre poète. Y a-t-il par le monde plus belle devise que celle de notre Prince de Galles, « *Ich dien* » « Je sers » ? — Voilà le vrai sens du mot « chevalier ».

Je ne vois pas que le génie de Burns ait été de nature spéculative : il était plutôt social et imaginatif, c'était un génie aux sympathies larges et vibrantes avec de vibrantes expressions. J'ai déjà dit à peu près la même chose d'Homère et d'Haëndel. Mais, par suite du moment et de la condition où le sort le fit naître, il ne connut point cette joie sereine, cette ferveur pour une ancienne croyance et des institutions vénérées, pour tout ce qui assure la paix sociale, ainsi que, pour prendre des types extrêmes, purent le faire Homère et l'auteur du 78<sup>e</sup> Psaume. Encore moins eut-il le temps de s'amuser avec de jolis riens, et seulement dans sa jeunesse qu'il ne prolongea guère au-delà. Il lui fallut, de bonne heure, se jeter dans la mêlée des conflits, lutter, se révolter, méditer, frapper aux bons endroits et recevoir lui-même des coups. Le conflit était déjà bien ancien, vieux de cinq siècles peut-être, mais il avait pris une nouvelle acuité dans les temps modernes. Les forces en présence étaient, d'un côté, la Théologie, représentée par le Calvinisme Ecossois, et de l'autre, son récent et mortel ennemi, l'Humanité du XVIII<sup>e</sup> siècle. Ces deux forces l'entouraient, le sollicitaient, l'assiégeaient de toutes parts. En ce qui concerne la première, il est difficile, pour quelqu'un qui n'est pas écossois, d'apprécier l'influence locale de l'œuvre de John Knox. Pour nous, qui regardons de loin

et à un point de vue général, cette œuvre, comme les autres formes du Protestantisme, est simplement une modification révolutionnaire du système catholique; mais, sans nul doute, celle-là eut, pendant quelque temps, une grande intensité de vie, une action forte pour inspirer et pour diriger les actes. Nous honorons, comme Burns lui-même le fit, cette rude et brave figure dans ce premier choc du combat mortel livré pour émanciper l'Humanité et la dégager du système ver-moulu du Moyen Age. Mais, lorsque nous songeons à l'échec ultérieur du protestantisme en Ecosse comme ailleurs, pour évangéliser et discipliner la pensée et l'activité modernes, nous pouvons dire que ses résultats les plus nets se bornent à une règle austère mais *provisoire* de vie personnelle et domestique et à un encouragement général à l'effort individuel, pour les choses matérielles comme pour les choses spirituelles. Grands résultats, en vérité, quoique la règle ait toujours été trop dure, qu'elle ait provoqué plus d'une rébellion et que l'effort ait été trop personnel, trop individuel, comme il l'est encore de nos jours en Ecosse. Songeons cependant à cette douce et noble Jeanie Deans et méditons cette remarquable assertion de Carlyle que « un homme sobre était cher à tout paysan écossais à un point que quelques mondains corrompus ne pourront jamais concevoir »; écoutons les mots même de Carlyle, sur ce sujet en général, en regrettant toutefois de ne pouvoir entendre aussi de l'autre côté l'avocat du diable. Dans son *Culte des Héros*, Carlyle s'exprime ainsi :

« — Dans notre île, s'éleva alors un Puritanisme qui par-  
 « vint même à s'implanter comme Presbytérianisme et Eglise  
 « Nationale en Ecosse; il fut le résultat d'un réel besoin du  
 « cœur et produisit par le monde des fruits très remar-  
 « quables. En un sens, on peut dire que c'est la seule phase  
 « du Protestantisme qui s'éleva au rang de foi religieuse, de  
 « véritable communion avec le Ciel et qui se montra ainsi à  
 « travers l'Histoire..... L'Ecosse jusque-là était une contrée  
 « sans âme; le côté rude, extérieur, grossier, demi-animal  
 « s'y était seul développé; mais, grâce à la Réforme, la vie  
 « intérieure se réveilla, sous cette écorce de matière morte.  
 « Une cause, la plus noble des causes, s'allume comme un



« phare haut placé, haut comme le Ciel et pourtant accessible de la Terre; une cause qui fait de l'homme le plus humble non seulement un Citoyen, mais un Membre de l'Eglise visible du Christ, un véritable Héros, s'il est un homme sincère ! Voici ce que j'appelle « toute une nation de héros » — c'est une nation *croiyante*. »

C'est à l'ombre de cette foi, devenue semblable à une feuille jaunie et desséchée, abritant encore l'ordre mais non plus le progrès, que Burns fut élevé. Ses institutions et ses docteurs occupaient le pays comme une garnison de soldats. De ses prédicateurs de Sabbath, Burns disait : « Ils ont bu au puits, — au puits si clair ! — de Calvin ». Cette même foi régnait chez lui, en la personne de son religieux père, mais sous une forme adoucie. Naturellement son âme sensible fut d'abord profondément touchée par cette religion et, jetant un regard affectueux sur le passé, il exprima ce sentiment dans sa pièce intitulée : « *Le Samedi soir dans une ferme* » (*Cottar's Saturday Night*), qui est si connue, et dans d'autres moins heureuses. Mais il ne tarda pas à comprendre qu'une telle foi et un tel régime n'étaient pas faits pour lui et qu'ils étaient en désaccord avec la vie moderne.

Ils conduisaient, ainsi qu'il put non seulement le penser, mais même le voir, à la superstition, au mensonge, à l'hypocrisie — quelquefois même à une monstrueuse et transcendante hypocrisie, comme le montrent un assez grand nombre de ses poèmes les plus caractéristiques et les plus puissants, à l'exemple des peintures d'*Hogarth* et du *Tartuffe* de Molière. L'audacité du génie est ici incontestable : quelle courageuse manière de traiter familièrement son sujet, de déchirer tous les voiles, de mettre l'intérieur à nu, de porter les plus violents défis, de frapper sur l'ennemi les coups les plus terribles ! Et c'étaient aussi des poésies pleines d'opportunité et qui venaient, je le crois, du fond du cœur, comme la superbe *Vision du Jugement*, de Byron, mais qui contiennent un élément dangereux qui se retrouve dans tout ouvrage du genre moqueur, qu'il soit de Burns, d'un prophète Elie quelconque, ou de tout autre. Pour ma part, je ne puis que louer ce genre de pièces, quoiqu'elles déplaisent à beaucoup de lecteurs de

Burns, et cela pour des raisons très respectables. Mais, en tout cas, ces poésies étaient caractéristiques et on est comme frappé de terreur d'entendre de tels mots brûlants monter du cœur et sortir des lèvres d'un jeune paysan, fils de parents pieux, simple observateur de la scène du monde ! Burns se révolta intellectuellement et moralement, sa révolte fut décisive et cependant il ne cessa pas de se conformer aux pratiques extérieures du culte. A vingt-cinq ans, son siège est fait. Au fond, il était, comme beaucoup d'autres, un simple déiste ; il croyait « en la Nature et au Dieu de la Nature » — et observez qu'ici la Nature vient la première et Dieu le second. La véritable relation entre cette doctrine et sa vieille et mortelle antagoniste lui échappait ; il ne saisissait pas davantage sa continuité avec celle de Shakespeare, de Bacon, de la Renaissance et même de l'ancienne métaphysique grecque ; mais il acceptait spontanément, avec une ferveur impétueuse, les vagues aspirations humanitaires du XVIII<sup>e</sup> siècle que sa doctrine semblait consacrer. Pour lui, poète et paysan, cette foi nouvelle semblait annoncer par dessus tout l'ère de la liberté ; liberté d'être sincère, liberté de se conformer jusqu'au bout à la vérité naturelle, liberté pour l'homme de céder à ses impulsions les plus élevées. S'il bénissait beaucoup, il maudissait autant ! Arrière Calvin et sa doctrine tyrannique ! La nature humaine n'est-elle pas foncièrement bonne comme l'âme, le corps ? La terre n'est-elle pas belle ? La vie humaine n'est-elle pas délicieuse, en tout cas extrêmement intéressante même jusque dans ses bas-fonds ? Il voulait pouvoir exprimer par des actes et des paroles, joyeusement et sans appréhension, son amour de l'homme, de la femme, de la nature, de toutes les choses animées et inanimées ; il voulait pouvoir célébrer l'universelle fraternité et réclamer pour le plus humble paysan la possession de sentiments élevés comme il convient à qui n'est plus esclave ou serf, mais homme libre. Il exalte les sentiments humains au-dessus de tout, comme on le voit, par exemple, d'une manière assez décisive, dans son *Adresse au Diable* dont je vous citerai la dernière strophe qui a enchanté des milliers d'âmes honnêtes :

« Et maintenant, bonsoir, vieux Nick !  
Puisse-tu avoir de bonnes pensées et t'amender !  
Peut-être alors pourrais-tu..... qui sait ?  
Avoir encore une chance !  
Cela me fait peine de songer à ce trou noir là-bas,  
Ne serait-ce que pour l'amour de toi ! »

Réfléchissez à ce que cela signifie réellement. Ici, l'on ressent le charme et la fraîcheur du plein air — du libre ciel — comme si l'on sortait d'une prison ou de quelque sombre école. Ce sont les grands et généreux espoirs du XVIII<sup>e</sup> siècle, si larges, si pleins — qui, un jour sûrement doivent s'accomplir, n'en doutez pas — si opposés à la béate austérité de Calvin et au cynisme de salon de Pope — dont ils descendent cependant en ligne directe. Mais, comment ces espoirs, ces aspirations arrivèrent-ils jusqu'à ce pauvre laboureur de l'Ayrshire qui possédait tout au plus une douzaine de livres?

D'abord, ils étaient dans l'air. Mais il dut y être aussi pour beaucoup, le livre fascinant de cet extraordinaire artiste, de ce penseur révolutionnaire que fut Laurence Sterne, ce livre dont Burns nous dit qu'il fut le compagnon favori de sa jeunesse. Sterne, donc, Goldsmith et quelques autres lui apportèrent ces idées, mais il les puisa par dessus tout dans le mouvement qui agitait alors l'Eglise elle-même, et qu'on appelait la « Lumière Nouvelle ». L'anecdote suivante vous fera saisir le caractère de ce mouvement, je l'emprunte à l'*Histoire du XVIII<sup>e</sup> siècle* de M. Lecky.

Francis Hutcheson fut un des chefs les plus distingués de la Lumière Nouvelle : il occupa pendant près de vingt ans la chaire de Philosophie Morale à Glasgow.

« Encore jeune homme, il remplaça un jour son père en chaire et son latitudinarisme fit, dit-on, quitter la salle à toute la rigide congrégation. « Votre maladroît de fils, dit « l'un des anciens, au père de Hutcheson, a dégoûté toute la « congrégation avec son impertinent babil; croyez-vous qu'il « a bavardé une heure à propos d'un Dieu bon et bienveillant, « des âmes des païens qui elles-mêmes seront sauvées si « elles suivent la lumière de leur propre conscience; et le « gaillard n'a pas dit un mot de la bonne et confortable doc-

« trine de l'élection, de la réprobation, du péché originel et  
« de la foi. On l'a hué, débarrassez-nous de lui ! »

(*Lecky*, II, 539).

Baignés des rayons de cette Lumière nouvelle, les espoirs, les délices, les sentiments humains arrivèrent à Burns et ils furent les motifs inspirateurs et le fond principal de son message poétique. J'y reviendrai, mais, pour le moment, je me borne à cette observation générale : ces sentiments étaient pour lui tout spontanés et non systématisés ; mais son œuvre fut plus importante qu'il ne le pensa lui-même. Pour l'avenir de l'Humanité, il était indispensable que le sentiment social, si négligé depuis la fin du Moyen-Age, fût renouvelé, protégé, renforcé jusqu'à ce qu'il soit enfin rétabli en un système harmonieux, comme le principal facteur de la vie, l'inspirateur de toute pensée et de toute conduite. Burns fut un précurseur de cette glorieuse mission. Il a eu depuis bien des successeurs, mais la plus grande partie de la tâche reste encore à accomplir.

Je dois maintenant montrer les dangers de l'œuvre que Burns entreprit. Son crédo métaphysique de « la Nature et du Dieu de la Nature », qui fut pour lui sa doctrine la plus générale, remonte à Aristote. Alliée avec l'esprit Positiviste, qui grandissait et qui était destiné à être un jour son Maire du Palais, cette doctrine a joué dans le passé un rôle indispensable, en modifiant et en affaiblissant le système théologique en vigueur, en recommandant et en imposant, une à une, des réformes importantes, quoique partielles. D'un autre côté, aussi longtemps que le système dominant conserva sa vigueur, le caractère révolutionnaire de la nouvelle doctrine fut tenu en échec et ainsi méconnu. Mais les choses changèrent lorsque, comme au temps de Burns, l'autorité théologique fut dans une décadence profonde ; alors, le crédo métaphysique, s'enhardissant de plus en plus, accusa davantage son caractère révolutionnaire ; il rejeta la cape et tira l'épée. De là le danger moral dont je veux parler. En se révoltant contre l'Eglise, son dogme et sa discipline, Burns fut naturellement amené à se revolter contre d'autres choses qui y étaient liées. L'obéissance à la morale *qu'ils* prescrivent ne

parut plus ni belle ni nécessaire, elle ne fut plus ce que Carlyle appelle « une incontestabilité haute comme le Ciel ». La liberté et la joie étaient maintenant les plus hautes incontestabilités et cela doit nous rendre défiants. Un droit sacré d'insurrection surgissait dans l'esprit du jeune poète ; le crédo qu'il adoptait, audacieux, plein de joie et d'espoir, rompait avec toutes les attaches vénérées du passé ; tout en aspirations, s'occupant peu des devoirs, sans institutions, sans habitudes pieuses, ni son sentiment ni sa doctrine ne pouvaient servir de *contrainte* morale. Burns parle souvent comme s'il était bien de vivre sans règle ni loi.

« Vive la joyeuse bande,  
Qui préfère danse et chanson,  
Qui ne médite pas sur le bien et le mal,  
Qui ne se conduit pas à la règle et l'équerre,  
Mais, suivant l'impulsion du moment,  
Est grave ou folle! »

Vous le voyez ! Point de règle ! Le droit pour chaque individu de faire ce qui lui plaît, une pleine confiance dans le sentiment naturel, dans le pur instinct ! Il n'est certainement pas bon pour nous d'avoir, de faire, de désirer même, tout ce que nous aimons, tout ce vers quoi nous porte notre nature. Que la Nature soit ce qu'on voudra, si notre premier devoir est de la comprendre et de l'accepter, le second est de l'adapter, de l'améliorer, si nous le pouvons, et de la façonner aux besoins sociaux. S'il y a une vérité qui découle de l'expérience humaine, c'est bien que la civilisation, la conduite vertueuse, le bonheur des autres et notre propre bonheur ne peuvent s'élever que sur les solides fondements de la contrainte morale. Burns savait que la mouche sotte se noie dans le miel ; bien certainement il le savait et souvent, dans sa misère, il l'a reconnu. Il se reconnaissait dépourvu de ce que, d'après Sterne, il appelait « la vertu subalterne de la discrétion ». Comme d'autres poètes révolutionnaires, en effet, il lui fallait parler et écrire sans cesse de lui-même et des chagrins de son âme. Mais, dans ce crépuscule de l'ancienne religion, alors qu'aux yeux des meilleurs et des plus sages s'obscurcissait, avec l'an-

cienne piété, l'ancienne sagesse, Burns ne pouvait s'en rendre compte. La nature humaine est bonne, foncièrement bonne, dans toutes ses parties et dans tous ses éléments ; mais voici la difficulté : elle est imparfaite et sa tâche est bien difficile, — bien difficile est la juste coordination de tous ses éléments, la juste subordination des impérieux instincts égoïstes aux sentiments sociaux. L'homme ne saurait en effet vivre seul. Nous ne sommes point indépendants ; la plupart d'entre nous se tiennent debout, comme les maisons, grâce à l'appui de leurs voisins et tous, nous vivons, comme Robinson Crusôé lui même, avec l'aide de nos prédécesseurs, avec l'aide de l'Humanité. Burns ne connut point cette Humanité bienfaisante, ni son pouvoir toujours grandissant et toujours inévitable, ni le lien de gratitude qu'elle impose, ni le devoir ni la contrainte. Il s'imaginait que l'homme pouvait se suffire à lui-même, sans se donner beaucoup de peine et ce frein personnel lui apparaissait comme une froide prudence, provenant d'un calcul égoïste, pour le présent comme pour l'avenir. Mais, vous le savez, nous ne suivons jamais les conseils de nos médecins ; cette sorte de contrainte échoue devant le désir. Pour être efficace, cette contrainte doit être ressentie comme un *devoir*, un devoir envers les autres, renfermant tout notre amour, tout notre respect, soutenu par une autorité sacrée, des convictions en harmonie les unes avec les autres, des habitudes pieuses, bref par une religion. Cette contrainte morale a été l'objet fondamental de tous les systèmes religieux, ces puissants et indispensables efforts de l'Humanité. Rappelez-vous la Théocratie Egyptienne, la République Romaine ou la Sainte Eglise Catholique. Toutes embrassèrent, pendant des générations, le Culte, la Doctrine et le Gouvernement, et établirent par ces moyens leur pouvoir de restriction et d'encouragement, comme une mère réprime tour à tour et encourage son enfant. Ainsi les religions domptèrent l'homme. Le Décalogue aurait été de peu d'efficacité, non plus que le grandiose précepte de saint Paul « Revêtez l'armure de Dieu », sans un système organisé correspondant, qui non seulement impose l'obéissance mais tempère le précepte par la sagesse humaine collective. Mais Burns ne

connaissait point une semblable religion, si ce n'est le Calvinisme ascétique qu'il rejetait, bien que, sans s'en rendre compte, il gardât encore quelque chose de son esprit absolu.

Cette doctrine générale qu'il acceptait « La Nature et le Dieu de la Nature » ne constituait pas une religion. C'était plutôt la négation de la religion. Il n'y avait là, comme je l'ai déjà dit, ni d'institutions, ni même d'Eglise. Il n'y avait pas de Culte, et la doctrine elle-même était vague et pleine d'équivoques. Non seulement elle n'imposait aucune contrainte, mais elle semblait même consacrer le laisser-faire le plus indulgent. Elle autorisait toute chose, tout désir, à la fantaisie du croyant, puisque la Nature comporte toutes sortes de désirs et d'objets, les bons, les mauvais et les indifférents. La Nature était tout. Il est certain que Burns ne pouvait trouver une meilleure croyance et, en tout cas, nous ne pouvons imaginer qu'il en eut une autre. Sans doute, cette croyance lui semblait naturelle et nécessaire, et posséder la sanction divine, elle consacrait ce qu'il aimait : les sentiments humains élevés ; elle flétrissait ce qu'il haïssait : les choses basses et honteuses. Mais, par sa composition hybride et relâchée, son caractère équivoque, cette doctrine s'abaissa aisément et se modela d'une façon ou d'une autre sous l'empire des convoitises et ainsi prêta son esprit absolu pour couvrir d'un voile d'apparente nécessité, d'apparente autorité, de simples *préférences*, les revêtant, pour ainsi dire, d'une teinte mystique qui obscurcissait ses côtés humains plus sérieux. C'est ainsi que Burns adora les femmes : la femme n'était-elle pas un don divin fait à l'homme ? Presque toutes lui parurent être envoyées comme de divines enchanteresses. Il aima les joyeuses réunions d'hommes. Une taverne gaie, où l'on boit des boissons fortes, réjouit les cœurs et délie les langues. Pouvait-il, lui, un Fils de l'Homme, un Enfant de la Nature, et peut-être le plus gai parleur de toute l'Ecosse, pouvait-il se priver de ces douces choses ? D'ailleurs, cette gaieté sans souci qui nargue le Diable, ces Bacchanales comme on les appelle parfois, ce goût pour les basses compagnies sans mœurs et sans frein étaient un peu, comme sa manière de faire l'amour, une révolte contre la discipline de l'Eglise et,

comme telles, elles avaient son approbation et celle de la plupart de ses lecteurs. Ces sentiments et ces aspirations dirigèrent sa vie et la gâtèrent, parce qu'il chercha à les satisfaire comme le plaisir l'y poussait, et qu'il croyait que le plaisir était d'ordonnance divine. et ne devait pas avoir de limites. C'est là ce qu'il veut dire dans sa « *Vision* », lorsqu'il écrit tristement sur lui-même ces vers, que le pieux Wordsworth ne pouvait comprendre :

« Et pourtant la lumière qui m'égara  
 Était aussi une lumière venue du ciel. »

Wordsworth ne pouvait le comprendre ; mais, je vous le demande, est-ce que tous ces mystiques plaidoyers ne sont pas constamment employés, de bonne ou de mauvaise foi ou d'une manière sophistique, pour excuser et même pour justifier l'erreur et le crime sur la terre ? Shakespeare le savait bien. Rappelez-vous ce que dit le bâtard, dans le « *Roi Lear* » : « Toi, Nature, tu es ma déesse ! » Et il part de là pour mentir, voler, commettre le meurtre et l'adultère, suivant ce qui lui convient ! Sa déesse, la Nature, le lui ordonne, sans doute ! De même Falstaff dit en parlant du prince Harry : « Si le jeune goujon est une amorce pour le vieux brochet, je ne vois pas pourquoi, selon les lois de la nature, je ne le happerais pas ». Ou encore, pour prendre un exemple dans la *réalité*, un exemple qui date d'hier mais qui est en même temps bien vieux, un écrivain pour défendre l'emploi du travail forcé dans l'Afrique du Sud, c'est-à-dire l'esclavage, ne nous a-t-il pas fait remarquer que « la Providence avait justement disposé une importante quantité de travail naturel dans ce pays, qui doit évidemment être utilisé ». — Telle est la perfidie de ce mysticisme, dernier résidu de l'esprit absolu, ainsi fut trahi par lui notre noble Burns qui pourtant ne rêvait que d'être sincère !

Dans les productions, pourtant si libres et si hardies, de son art, un respect spontané de l'Humanité (la voie cachée du passé) l'arrêta presque toujours sur la pente des excès ; il n'en fut pas de même dans sa vie. Là il s'abandonna,



s'abusa, rêvant à moitié qu'il faisait bien, se repentant ensuite amèrement, défendant sa foi trompeuse dont parfois cependant il lui arrivait de douter.

Cette foi, je l'ai dit, était alors, comme maintenant, très communément répandue. Si nous en avons profité, beaucoup profité même sans aucun doute (car nous ne devons pas oublier ceux qui ont durement préparé notre délivrance), nous avons aussi souffert du fait de cette contrainte insuffisante. Non seulement, grâce à elle, nous avons mal gouverné nos appétits corporels, mais dans les choses de l'intelligence et dans les affaires pratiques, nous avons, par son fait, fortement erré : des croyances extravagantes, des actes capricieux, un art décousu et licencieux, une politique de boucaniers, un système industriel âpre et désordonné, tel est son bilan ! Sans les traditions d'ordre moral profondément ancrées dans le cœur des femmes, la société aurait été détruite avant d'avoir pu trouver une autre croyance suffisante. Mais, si vous demandez pourquoi Burns se trompa plus évidemment que bien d'autres, je répondrai que ce fut en grande partie à cause de sa grandeur même et de sa position très en vue. Les hommes placés en front de bataille tombent toujours. Dans ce rebelle xviii<sup>e</sup> siècle (et le temps était mûr pour la rébellion !) Burns, grand et mâle génie, tout impulsion, tout passion, plus indépendant qu'aucun autre, occupait la tête du mouvement ; de plus, justement parce qu'il était poète, écrivain sans frein, sans souci des convenances, traitant des hauts et des bas de la nature humaine, et aussi à cause de l'orthodoxie pharisaïque qui régnait alors, et de sa propre foi dissolue et démoralisante, il devait forcément devenir un *outlaw*. Rappelez-vous Byron, rappelez-vous Shelley et tant d'autres, dont Burns fut le précurseur !

Cette explication est, à mon avis, bonne jusqu'à un certain point et très importante si l'on se place à un point de vue général, mais je suis loin de vouloir vous l'imposer comme une explication complète du caractère de Robert Burns. Les replis de l'âme humaine ont des secrets qui dépassent notre entendement. Comme contraste avec Burns, songez à Wordsworth, ce solitaire buveur d'eau, songez à Descartes qui se

faisait de si sévères règles de conduite, tout en poursuivant son projet révolutionnaire de réforme intellectuelle.

Il sera donc suffisant de déclarer qu'il y a dans la vie de Burns certaines choses que nous devons *condamner*. Par ses irrégularités, il nuit à lui-même, à son génie et aussi à ceux auxquels il aurait dû prodiguer le respect et les soins les plus affectueux. Nous admettons tout cela, mais nous n'irons pas jusqu'à séparer dans notre jugement l'homme de son œuvre, comme si cette œuvre n'était point partie intégrante de lui-même. On peut justement et utilement agir ainsi dans un tribunal de police ; mais, ici, nous devons juger l'homme tout entier. Alors, tout bien pesé, nous trouvons, dans cette œuvre et dans cette vie, au sens large du mot, des raisons d'admirer, d'honorer et d'aimer beaucoup l'homme. Il n'eut certes pas *toutes* les vertus : il n'était ni modeste, ni sobre, ni chaste, ni constant ; il manquait à peu près complètement de ces splendides qualités humaines et il ne connut point les délices et la bonté sereine qu'elles procurent. Son regard intellectuel ne portait pas très loin : il ne pouvait ni comprendre ni vénérer le passé. Mais il fut un de nos bienfaiteurs, il contribua à notre délivrance et paya gaiement de sa personne, avec un cœur, un esprit, un langage plein d'éclat, d'audace et de force ; il lutta, telle fut sa destinée, sans appui, sans armes, au milieu des éléments troublés d'une théologie en décadence, de pensées discordantes et d'aspirations élevées, magnifique de volonté par certains côtés, faible dans d'autres et sombrant dans la discipline élémentaire de la vie ; mais brave, honnête, aimant, gai, généreux et compatissant, le plus fraternel des hommes. Et vraiment, en travaillant pour nous, il souffrit aussi pour nous. Il fallait que la doctrine douteuse fût éprouvée, il fallait que les sentiers périlleux fussent parcourus, et ces sentiers-là conduisaient loin.

Et maintenant, disons quelques mots de l'œuvre elle-même ; c'est par elle, mieux que par ce que nous savons de sa vie privée, mieux surtout que par ses imperfections, que nous devons juger un poète. L'œuvre d'un vrai poète est en effet le don qu'il a voulu faire aux hommes, le présent de ce qu'il y avait en lui de meilleur et de plus heureux, le produit sin-

cère de son cœur et de son esprit — c'est là ce que l'Humanité réclame et s'approprie, c'est là ce qu'elle aime au point d'en oublier les imperfections.

Et l'œuvre de Burns parle d'elle-même ; moins que tout autre grand poète, il a besoin d'explication ; il est le plus simple de tous ; non seulement il se confine dans le réalité qu'il peut observer, mais, presque toujours, il prend des sujets élémentaires, familiers et pouvant intéresser tout le monde et il les attaque de front. Il cherche plus la vérité que la beauté et le langage rural de son pays natal lui sert ici admirablement. Ce langage le rend rude, rude mais vrai ; il lui fait éviter la fausse et bizarre pastorale qui l'avait précédé et même il est pour lui, quel que soit le but qu'il se propose, un riche et vigoureux instrument. A cet égard, il doit quelque chose à ses ascendants. Il eut aussi sa bonne part de ce bon sens qu'il fait ainsi maudire par son hypocrite :

« Ce chien féroce appelé sens commun  
Qui mord si dur. »

Il est souvent concis comme Dante, et ces deux vers le prouvent bien. Mais, par dessus tout, son intention est claire comme la lumière du soleil, nette comme son ombre, car (et c'est par là que nous le connaissons le mieux) sa sensibilité brûle comme une flamme pure, et son intelligence en est le dévoué serviteur, n'ayant pas à elle sa besogne propre. Nous ne sommes pas troublés chez Burns par un excès d'intellectualité, le critique littéraire le sait bien et, ce qui est plus important, l'heureux lecteur illettré en a lui-même le sentiment. Que Burns nous conte un fait simple et touchant, qu'il s'abandonne à la plus pathétique, à la plus sincère passion, qu'il extravague, qu'il plaisante ou qu'il déchire par sa satire (et tout cela se rencontre en lui) — ses mots et ses images vont droit au but que ses impressions ont fortement marqué. Que de fois nous tombons sur le mot *inévitabile*, sur le vers *inévitabile* autant qu'inoubliable !

Tous ces poèmes sont des effusions du moment, l'expression de ses impulsions de circonstance — et cela sans apparence d'art. Leur mérite aussi est varié ; beaucoup tom-

beront dans l'oubli ou y sont déjà tombés, surtout, je crois, les derniers, mais ses meilleures pièces sont simplement triomphantes par leur appel si sincère et si chaleureux aux sentiments que nous éprouvons tous et que nous aimons le mieux. Et quelle profonde et prophétique signification pour nous dans ce fait d'un simple laboureur qui chaque jour conduit la charrue, mais qui, comme dans une lueur, a le sentiment que ses dons de poète sont d'origine sacrée, qui regarde son art comme l'exercice d'un culte, qui place la joie de la création poétique au-dessus de toutes les autres joies à ce point qu'en tirer de l'argent lui semblait presque une profanation !

« Que je reçoive seulement une étincelle du feu de la  
C'est là toute la science que je veux avoir ! [Nature ;  
Et bien que peinant, dans la terre et dans la boue,  
Avec ma charrue ou ma cariole,  
Que ma muse, dans son rustique accoutrement,  
Puisse encore toucher le cœur ! »

Ce dédain du savoir était justifié dans son cas ; mais les plus grands poètes n'ont point eu ce dédain et ils ne l'auront jamais, car ils sont les Fils reconnaissants et respectueux de la Lumière et ils savent utiliser ses rayons. Burns fut, en tout, le poète de la Révolution, de l'insurrection contre le passé. Il fut un précurseur de l'indispensable Révolution française qui est un soulèvement européen, bien plus, qui marque une époque dans la marche de l'Humanité.

Et naturellement aussi Burns partagea ses vastes espoirs. Ses thèmes les plus élevés furent la suprématie de l'homme et la fraternité des peuples. Sourdement préparés par plusieurs siècles, ils éclataient maintenant tout à coup sous le ciel, ils furent la caractéristique du siècle auquel il appartenait. Burns les a maintes fois exprimés, et il le dit ici encore dans son style imposant, prophétique et pourtant si familier :

« Arrive ce qui pourra et ce qu'on voudra,  
« Cela sera, cela sera, voilà tout !  
« Alors, les hommes, par le monde  
« Seront tous des frères et voilà tout ».

Il n'y aucune réserve, aucune condition à une telle foi. C'était

là un message révolutionnaire, nous le savons, et seulement un demi-évangile ; pour lui ce fut un évangile tout à fait. Il ne connut pas cette vérité plus haute de la continuité humaine, moins que d'autres poètes, beaucoup moins que Voltaire qui disait : « Cultivons notre jardin. » A la révolution annoncée dans son message, Burns fait de nombreuses et terribles allusions. Les riches et les grands, les prêtres et les rois font mauvaise figure dans ses pages, l'homme pauvre est toujours orgueilleux, trop orgueilleux, quelquefois même envieux, mais pas toujours cependant.

Par un certain côté, Burns fut certainement le premier des poètes qui honorèrent le travail : le travail pacifique, libre, bienfaisant, heureux. Il l'honora noblement et fut un des premiers à le faire en son temps. Mais le travail sera encore plus en honneur dans l'avenir, car le travail qu'il connut n'était pas celui que son grand cœur aurait voulu pour ses semblables. Son seul maître avait été son père et son travail un travail librement accepté, mais, même ainsi, il avait été souvent dur et au-dessus de ses forces et toujours empoisonné par l'écrasante pauvreté. Il en voyait trop d'autres souffrir pire sous des maîtres et cela sans espoir. Gloire à ce vaillant esprit qui combattit sans se laisser fléchir les duretés de la nature, qui se tint droit et parla haut, qui ne permit pas qu'on dise jamais de lui ce que Gray avait dit trop justement des pauvres laboureurs qui dorment leur dernier sommeil dans le cimetière de campagne !

« La froide pauvreté glaça leur noble colère  
Et paralysa les ardentes impulsions de leurs âmes ».

Il y aura toujours des travailleurs. Gloire donc à celui qui sut si bien sentir et exprimer cet amour large et profond de l'Humanité et qui fut peut-être le premier à dire dans ses chants que le laboureur doit avoir sa part des joies spirituelles, que son plus grand bonheur est à son foyer et qu'il peut ainsi être heureux en cultivant son champ !

Vous sentez tous, en effet, combien Burns aimait la terre et toutes les créatures, et comment son amour, reconnaissant de leurs services spontanés et de leur intimité de tous les

jours avec l'homme, leur vouait une profonde sympathie et leur prêtait même des sentiments humains. Je ne puis m'étendre sur la grande importance d'une telle habitude mentale, sur son opposition spontanée avec toute Théologie et spécialement avec le Monothéisme qui traitait la nature comme inerte. Je ne peux pas non plus parler de son pouvoir dans le passé, dans le présent, de la majesté de son rôle dans l'avenir, que Comte nous a si bien exposé, mais je dois dire ceci : c'est que cette voix, la voix de Robert Burns, fut la première en son temps à réclamer, à restaurer, à exalter, en se servant des expressions de la vérité et de l'art modernes, cet impérissable et délicieux élément de la conscience humaine universelle.

Avec tous ces objets en vue — la plupart dépassant de beaucoup l'horizon de la Théologie — exprimer les meilleurs sentiments de son temps et quelques-uns du nôtre et les offrir au public dans la coupe enchantée de la poésie, c'était bien là une victoire. Dans ce courant pur et joyeux, toute l'amertume du conflit théologique disparaît enseveli et oublié. Burns est vraiment un conquérant ! Il s'empara d'un seul coup du monde des lecteurs et cela en dépit de son dialecte local dans lequel seul il pouvait exprimer ce qu'il avait dans le cœur, et il est maintenant le poète favori de tous ses concitoyens, à l'exception peut-être des nobles et des prêtres, l'ami de tous ceux qui peuvent connaître son livre ou ses chants. Ecoutez cette histoire. Un fermier écossais entre un jour à l'auberge et voit un de ses amis assis au coin du feu, un livre à la main. Jetant un regard furtif par dessus l'épaule du lecteur, il le salue en disant : « Quoi, vous lisez encore le vieux Rob ? » — A quoi l'autre répondit : « Toujours et tant que je vivrai ! »

Mais il y a un autre sujet auquel j'ai déjà fait allusion et sur lequel je veux revenir — le sujet favori de notre poète — l'amour des amoureux, elle et lui, lui et elle. Et quoi d'étonnant que ce soit là le sujet favori de Burns, si bien en rapport avec l'esprit révolutionnaire de ses lecteurs ! Où trouver une indépendance plus complète et de l'Eglise et de l'Etat, des impulsions plus vives, une volonté plus libre, plus de per-

sonnalité, plus d'impérieux désirs et des genres plus variés et plus nombreux d'humeur et de situation, depuis le ridicule jusqu'au cynique?

Dans tous ces genres, sans en excepter le dernier, Burns était passé maître. Mais, à son honneur, celui qu'il préférait, lui, l'homme fort, c'était la tendresse. Il adorait les femmes ! Un de ses derniers chants fut : « *O wert thou in the cauld blast ! (Oh ! si tu étais dans le vent froid)* » qu'il écrivit pour Jessie Lewars, l'aimable femme qui prenait soin de lui. Vous pouvez éprouver certainement maintenant ce qu'il y a de délicieux dans ce sujet éternel et favori de Burns.

Et cependant, il est bon de vous rappeler que dans toutes les religions qui ont groupé les hommes, l'amour des amoureux n'a joué qu'un rôle très secondaire. Mais l'Amour dans le Mariage, cette héroïque et charmante institution de l'Humanité, si lente à s'établir et, comme le prouve trop bien l'expérience moderne, si difficile à maintenir, est une chose autrement haute et respectable, l'amour des époux qui comprend, tout une vie durant, le doux office de femme et de mère. Pardonnez-moi, vous tous jeunes gens qui faites vos délices de Burns, pardonnez-moi de vous répéter que si Burns, parlant de cet amour des amoureux, a su, sans s'éloigner de la vérité, le parer de toute la beauté idyllique du paradis, il a su aussi, dans ses meilleures pièces, nous faire sentir la haute signification sociale, je dirai presque religieuse, de l'honneur chez l'homme et de la pureté chez la femme. Que cela est vrai ! Il n'y a pas de devoir plus sacré que d'aimer et de protéger celles qui ont tant besoin d'amour et de protection, ces êtres qui sont de tous les plus aimables et les plus tendres.

---

# BULLETIN D'ANGLETERRE

---

## SOCIÉTÉ POSITIVISTE DE MANCHESTER

### RAPPORT DU COMITÉ POUR LA DOUZIÈME SESSION (1895-96)

Voici la liste des sujets qui ont été traités dans les vingt-deux conférences du dimanche qui ont eu lieu à Memorial-Hall, durant la session qui vient de s'écouler :

|                           |                                                                                                        |                          |
|---------------------------|--------------------------------------------------------------------------------------------------------|--------------------------|
| 3 novembre 1895.          | <i>Discours d'ouverture</i> , par M. Higginson.                                                        |                          |
| 10        »               | <i>Les populations arriérées.</i>                                                                      | »                        |
| 17        »               | <i>Le discours sur l'ensemble du Positivisme</i> , de Comte.                                           | ch. I, par M. Higginson. |
| 24        »               | »                                                                                                      | ch. II.        »         |
| 1 <sup>er</sup> décembre. | »                                                                                                      | ch. III.       »         |
| 8         »               | »                                                                                                      | ch. IV.       »          |
| 15        »               | »                                                                                                      | ch. V.        »          |
| 22        »               | »                                                                                                      | ch. VI.       »          |
| 29        »               | <i>Commémoration des morts.</i>                                                                        | »                        |
| 5 janvier 1896.           | <i>L'Humanité.</i>                                                                                     |                          |
| 12        »               | <i>L'Union sociale : I, Religieuse.</i>                                                                | »                        |
| 19        »               | <i>L'Histoire de la chimie</i> , par H.-G. Jones.                                                      |                          |
| 26        »               | <i>L'Union sociale : II, Historique</i> , par Higginson.                                               |                          |
| 2 février.                | <i>L'Union sociale : III, Nationale.</i>                                                               | »                        |
| 9         »               | <i>Les hôpitaux.</i>                                                                                   | »                        |
| 16        »               | <i>L'Union sociale : IV, Municipale.</i>                                                               | »                        |
| 23        »               | <i>Le mouvement positiviste et le progrès.</i>                                                         |                          |
| 1 <sup>er</sup> mars.     | <i>La vie et la mort</i> , par H.-G. Jones.                                                            |                          |
| 8         » (matin)       | <i>L'Eglise chrétienne ; sa fondation et les persécutions dirigées contre elle</i> , par S.-H. Swinny. |                          |
| » (soir)                  | <i>La question du Venezuela.</i>                                                                       | »                        |
| 15        » (matin)       | <i>L'Eglise chrétienne, militante et triomphante</i> , par S.-H. Swinny.                               |                          |
| » (soir)                  | <i>Arménie, Russie et Turquie.</i>                                                                     |                          |



Nous annonçons avec regret que notre collègue M. Peter Russel se retire de notre Comité, tout en continuant à prêter son appui sincère à notre propagande.

Nous avons à déplorer la mort (1<sup>er</sup> février) de M. Daniel Ferguson qui, avec quelques réserves, s'intitulait lui-même positiviste, souscrivait à notre subside, et suivait exactement les cours de notre Société, depuis plusieurs années. M. Higginson lui a consacré un article nécrologique dans la « *Positivist Review* » de mars.

. . . . .  
Nous avons ajouté vingt livres à notre *Fonds de réserve* qui s'élève maintenant à plus de 70 livres. Le nombre de nos souscripteurs a augmenté de deux et les sommes souscrites se sont accrues d'environ 13 livres pendant que nos dépenses diminuaient d'environ 5 livres. La vente de nos livres a baissé d'environ 15 shillings, ce qui est en rapport avec la diminution du nombre de nos réunions, durant cette session.

Les souscriptions nouvelles devront être adressées à M. C.-G. Higginson, 3, Burlington-Road, Willington-Manchester.

Suït l'établissement des comptes vérifié par James Odgers.

Pour le Comité : Charles-Gaskell HIGGINSON,  
Charles MELLOR.

---

# BULLETIN DE FRANCE

---

## I. — AUGUSTE COMTE ET L'ÉVOLUTION MODERNE

EN PHILOSOPHIE, EN SCIENCE, EN ART, EN POLITIQUE

### L'OPPORTUNISME ET LE POSITIVISME

*Discours de MM. Waldeck-Rousseau et Constant Hillemand,  
au Banquet de Saint-Mandé.*

Tout observateur qui étudie avec la méthode de filiation les diverses manifestations de la vie sociale chez les populations occidentales (restées en Europe ou transplantées en Amérique) est obligé, fût-il un adversaire, de reconnaître — pour peu qu'il soit perspicace et de bonne foi — qu'Auguste Comte doit être considéré comme le principal inspirateur de l'évolution sociale chez ces peuples, dans la seconde moitié du XIX<sup>e</sup> siècle.

Tel est, par exemple, le cas si typique du plus récent historien du Positivisme, le Révérend père jésuite Hermann Gruber. Dans ses études sur *Comte et le Positivisme*(1), ce catholique militant, qu'on ne saurait évidemment suspecter de partialité en notre faveur, n'a pu s'empêcher de convenir « que le mouvement positiviste dont Auguste Comte a été l'initiateur, gagne, depuis une génération, sous des formes diverses, le domaine tout entier de la philosophie, de la science, de la littérature, de la politique ». Et son commentateur, M. Ollé-Laprune, renchérit encore sur cette constatation en prétendant qu'il n'y a pas, pour ainsi dire, « une seule idée dominante de Comte qui n'ait pris corps dans la vie publique. » Aussi, leur conclusion à tous deux est telle

(1) *Auguste Comte, fondateur du Positivisme; sa vie, sa doctrine*, par R. P. Gruber, S. J.; traduit de l'allemand par l'abbé Ph. Mazoyer; précédé d'une préface, par M. Ollé-Laprune, Maître de conférences à l'Ecole normale supérieure; 1 vol. — *Le Positivisme depuis Comte jusqu'à nos jours*, 2<sup>e</sup> volume, Paris, 1893. Lethielloux, éditeur.

qu'il n'y a plus, dès aujourd'hui, réellement en présence que deux doctrines, dont l'une est le christianisme, dont l'autre est le Positivisme (1).

L'influence du Positivisme dans le monde est même si considérable qu'elle paraît, à bon droit, hors de proportion avec le nombre relativement restreint de ceux qui font officiellement partie des agrégations positivistes disséminées à la surface de la planète, quelle que puisse être leur valeur individuelle.

C'est que, comme le font remarquer avec raison le père Gruber et M. Ollé-Laprune, il y a deux sortes de Positivisme : « il y a un Positivisme strict qui est une Doctrine, et mieux encore, une Eglise, et il y a un Positivisme large qui est surtout une Méthode et un Esprit. »

En préconisant et en effectuant l'extension à l'étude des phénomènes sociaux et moraux, de la méthode d'observation usitée dans les sciences cosmologiques et biologique, — en formulant explicitement les règles de son emploi systématique dans tous les ordres de phénomènes, — en la constituant en discipline de l'esprit, — Auguste Comte a, en effet, fondé la *Méthode générale* dont se réclament, de nos jours, tous ceux qui pensent et qui sont à la hauteur de leur époque, et a été l'inspirateur de cet esprit positiviste qui règne présentement en maître dans tous les champs de l'activité intellectuelle.

D'autre part, en classifiant les sciences abstraites d'après le principe subjectif de leur complexité croissante, — en les présentant comme des constructions de l'esprit humain, soumises dans leur évolution à la loi des trois états et ayant pour destination le service de l'Humanité qui les a créées, — en coordonnant autour de ce Grand Etre, non seulement les idées, mais aussi les sentiments et les actes, — il a constitué une nouvelle philosophie, et posé les fondements d'une nouvelle doctrine de ralliement et de règlement, c'est-à-dire d'une nouvelle religion, dont il a pu déterminer ensuite dans le *Catéchisme positiviste* le dogme, le culte, le régime (2).

(1) « La guerre véritable, celle où les partis sérieux s'engagent entièrement, est bien entre ces deux doctrines ». *A. Comte fondateur du Positivisme*, p. XVIII.

(2) Le *dogme*, c'est-à-dire la science condensée dans la notion de ce Grand Etre, l'Humanité, relativement éternel par rapport à l'individu, et dont les destinées sociologiques se déroulent sous la prépondérance inévitable de fatalités biologiques et cosmologiques qu'il faut connaître; — le *culte*, c'est-à-dire l'ensemble des procédés les plus propres

Or, si les adeptes de l'Eglise positiviste, répandus à Paris, à Londres, à Stockholm, à Budapest, à Rio-de-Janeiro, à Santiago du Chili, à Calcutta, à Mexico, etc..., peuvent, à la rigueur, se compter, — innombrables sont ceux qui s'inspirent de la méthode positive et de l'esprit positiviste, depuis le savant qui adhère simplement à la Classification des sciences jusqu'au disciple de Littré qui accepte la Philosophie positive en repoussant la Religion de l'Humanité, jusqu'au disciple de Stuart-Mill qui accepte le principe de la religion nouvelle en repoussant le culte.

De toutes les doctrines qui ont gouverné ou gouvernent encore le monde, le Positivisme se trouve être la seule à laquelle on puisse ainsi adhérer à des degrés divers. « Tandis qu'on ne peut être catholique qu'autant qu'on accepte sincèrement tout ce que contient le *Catéchisme*, qu'on ne peut être disciple de Mahomet qu'autant qu'on admet tout le contenu du *Coran*, on peut être positiviste sans tenir pour articles de foi toutes les propositions contenues dans la *Politique positive* ou dans la *Synthèse subjective* ». C'est la première conséquence et l'avantage d'une doctrine fondée sur la relativité des connaissances humaines.

Car il n'y a pas à prétendre que le Positivisme large est indépendant du Positivisme strict. Le père Gruber et l'auteur de la préface de son livre excellent tous deux à démontrer que ces deux formes générales du Positivisme se rattachent l'une à l'autre, non seulement parce qu'elles ont un point de départ commun, mais encore parce qu'elles manifestent les mêmes aspirations. C'est bien Comte qui, selon l'expression du père Gruber, « a donné l'impulsion décisive à tout le mouvement » quelle que soit la multiplicité des courants secondaires (1). Et, d'autre part, les aspirations sont si bien les mêmes que « la tentative de devenir une religion », fait observer M. Ollé-Laprune, « survit partout aux railleries dont elle est l'objet et se révèle là même où la philosophie proprement dite l'emporte ». Les conceptions de la dernière

à cultiver les sentiments altruistes et sociaux, procédés parmi lesquels figure la glorification de tous les grands hommes et de toutes les grandes institutions du passé, de tout ce qui a contribué ou contribue au maintien et au progrès des rapports sociaux ; — le *régime*, c'est-à-dire les règles générales qui doivent présider aux actes humains, les obligations de l'homme civilisé, successivement et simultanément envisagé dans son existence personnelle, domestique et sociale.

(1) « Le Positivisme large et le Positivisme strict, tous deux vivants et puissants, ont l'un et l'autre en Comte leur fondateur » (Ollé-Laprune, *in-préface*).

« période de la vie de Comte », ajoute-t-il, « ont plus d'influence qu'on ne croit sur ce Positivisme au sens large, qui envahit de nos jours tous les domaines de la vie sociale... On a souvent ri de la religion de l'Humanité, du culte institué par Comte en l'honneur de Clotilde de Vaux et du pouvoir spirituel qu'il voulut établir. Mais la « libre-pensée », même dégagée de ces rites, en retient quelque chose. Il y a de nos jours un certain culte de la femme et de l'art qui imite, qui parodie le culte vraiment religieux. N'y aurait-il pas là, avec d'autres influences, quelques traces des idées de Comte et de ses pratiques. Partout, la « libre-pensée » affirme hautement la prétention d'exercer de fait, au nom de la science, ce pouvoir spirituel dont Auguste Comte a jeté les bases théoriques dans ses ouvrages et dont il a essayé l'organisation. La façon dont on insiste sur le rôle social de l'éducation est inspirée par cet esprit. C'est bien à s'emparer des âmes mêmes que l'on travaille, c'est bien une unité intellectuelle et morale nouvelle que l'on veut préparer, et par là une unité sociale très forte. Ces idées se font jour de toutes les manières. Le Positivisme, même purement philosophique, a les prétentions d'une religion. » — On ne saurait mieux dire. Du reste, les diverses formes du Positivisme se relient les unes aux autres par des transitions insensibles.

Ce qui demeure certain aux yeux de nos deux théologiens, c'est que « l'esprit positiviste, sous l'une ou l'autre de ses formes, est partout à l'heure qu'il est ».

Et, en effet, venons-nous à jeter un regard dans l'intérieur des divers cadres de l'activité humaine, que nous voyons immédiatement prévaloir l'influence d'Auguste Comte.

Dans le domaine philosophique, ce sont les esprits les plus différents qui le proclament à l'envi le grand *leader* de la pensée moderne.

Du vivant même de notre Maître, miss Martineau constatait sa prodigieuse influence en ces termes : — « Partout où nous regardons, nous voyons que les idées de Comte sont à la surface, et que les juges compétents reconnaissent en silence qu'elles forment la base de la systématisation de nos connaissances. »

Postérieurement à la mort du philosophe français, J. Stuart-Mill écrivait de son côté, en 1865, ces lignes : — « Depuis quelque temps, on a beaucoup parlé, en Angleterre et sur le continent, du *Positivisme* et de la *Philosophie positive*. Ces expressions qui, pendant la vie de l'éminent penseur qui leur a donné

« cours, ne s'étaient fait jour dans d'autres écrits ni dans d'autres  
 « débats que ceux du très petit nombre de ses disciples directs,  
 « ont enfin émergé des profondeurs de la philosophie du siècle,  
 « pour venir se manifester à sa surface... Ce sont les symboles  
 « d'un mode de penser reconnu, et d'un mode de penser dont  
 « l'importance est assez grande pour introduire presque tous  
 « ceux qui, aujourd'hui, discutent les grands problèmes de la  
 « philosophie, ou examinent d'un point de vue élevé les croyances  
 « de notre temps, à prendre en sérieuse considération ce qu'on  
 « appelle la conception positiviste des choses... La littérature ou  
 « la critique françaises mentionnaient à peine le grand traité de  
 « M. Comte que déjà il travaillait puissamment les esprits d'un  
 « grand nombre d'hommes d'études et de penseurs en Angle-  
 « terre, etc... La manière positiviste de penser a déjà manifesté  
 « son importance par un signe des moins équivoques, à savoir  
 « l'apparition de penseurs cherchant un compromis ou juste mi-  
 « lieu entre elle et son adversaire (la métaphysique). M. Taine,  
 « le critique... subtil, et M. Berthelot, le chimiste distingué, sont  
 « les auteurs des deux tentatives les plus remarquables en ce  
 « genre. » (*Auguste Comte et le Positivisme*, traduction Clémenceau.)

Beaucoup plus tard, en 1882, Renan, répondant à M. Pasteur, à l'Académie française, faisait cette déclaration : — « Je ne suis  
 « pas en situation de rendre pleine justice à M. Comte. Je ne  
 « puis cependant m'empêcher d'être ému quand je vois tant  
 « d'hommes de valeur, en France, en Angleterre, en Amérique,  
 « accepter ce nom comme un drapeau. Avec l'habitude que je  
 « peux avoir des choses de l'esprit humain, je suis amené à croire  
 « que M. Comte sera une étiquette dans l'avenir, et qu'il occu-  
 « pera une place importante dans les futures histoires de la  
 « philosophie. »

Plus récemment, le *Verdens Gang*, journal radical influent de la Norvège, appréciait en ces termes l'influence exercée par Comte : — « Une génération à peine s'est écoulée depuis qu'il a été con-  
 « duit au tombeau pauvre et méconnu, et déjà il règne comme le  
 « prince des esprits sur les deux rives de l'Atlantique. »

Enfin, tout dernièrement, M. Faguet nous livrait cet aveu qui, venant d'un universitaire académisable, est particulièrement caractéristique : — « Auguste Comte n'est ni plus ni moins que  
 « le roi de la pensée du XIX<sup>e</sup> siècle ».

Il suffit, en effet, de passer en revue les noms des principaux agents de l'évolution philosophique moderne, indépendamment de ceux appartenant à l'Ecole positiviste orthodoxe, pour se

convaincre que tous ceux qui ont pensé en ce siècle se sont inspirés, à des degrés divers, de la méthode formulée par Comte et des principes qu'il a établis.

A l'appui de cette assertion, nous n'avons qu'à citer — pour la France : Berthelot, Bertrand (de Lyon), Darlu, Durkheim, Alfred Espinas, Faguet, Fouillée, Guyau, Leblais, Littré, Paulhan, Picavet, Ernest Renan, de Roberty, Taine, G. Tarde, etc. ; — pour la Belgique : Hubert Boens, Hector Denis, Goblet d'Alvieilla, de Greef, etc. ; — pour l'Angleterre : Alexander Bain, Cairnes, Th. George Holyake (le principal auteur du mouvement seculariste), Huxley, Ingram, Georges-Henry Lewes, Alfred Marshall, H. Maudsley, J. Stuart Mill, Herbert Spencer, etc. ; — pour l'Allemagne : Maximilian Brütt, Czolbe, E. Dühring, Kirchmann, Knies, Ernest Laas, Springer, Strauss, etc. ; — pour la Suisse : Hugo Gœring, Clémence Royer, etc. ; — pour l'Autriche-Hongrie : François Drtina, Josef Durdik, Joseph Kaizl, Masaryck, professeurs à l'Université tchèque de Prague, etc. ; — pour le Danemark : Harald Høffding, professeur à l'Université de Copenhague ; — pour la Roumanie : B. Conta, professeur de Droit à l'Université de Iassy ; — pour l'Italie : les professeurs d'Universités Andrea Angiulli, Ardigo, G. Cerca, Cermenati (président du Cercle des naturalistes), Colozza, de Dominicis, G. Ferrero, Errico Ferri, Ausonio Franchi, Labanca, César Lombroso, Errico de Marinis, Mario Pilo, de Sanctis, Sciamanna (président de la Société d'anthropologie de Rome), Giuseppe Sergi, Schiattarella, Siciliani, etc. ; — pour le Portugal : Vasconcellos Abren, Teixeira Bastos, Théophilo Braga, Al. de Conceicao, Julio de Mattos, Candido de Pinho, rédacteurs de la Revue bi-mensuelle *O Positivismo*, etc. ; — pour l'Espagne : Oct. Lois et les rédacteurs de la *Rivista contemporanea*, etc. ; — pour la Russie : N. Grot, Lessewitsch, Pissareff, Th. Wechniakoff, Wyruboff, etc. ; — pour l'Amérique du Nord : Bell, G. Ingersoll, Ludeking, Lester Ward, etc. ; — pour l'île de Cuba : Enrique-Jose Varona, professeur à l'Université de la Havane. — Je ne cite pas le Mexique et l'Amérique du Sud parce que le Positivisme n'y revêt guère que la forme orthodoxe. — « Il n'est pas jusqu'à l'Université de Tokio, capitale du Japon, où le Positivisme ne soit enseigné » (Gruber).

Je n'ignore pas que plusieurs, parmi ceux que je viens de nommer, ont protesté ou protestent contre la qualification de disciples de Comte. Mais leurs protestations restent sans valeur devant la Critique armée, de la Méthode de filiation.

C'est vainement — qu'un des plus célèbres champions du Positivisme en Allemagne, le professeur Ernest Laas (*Idealismus und Positivismus*), a prétendu « découvrir le véritable père du Positivisme dans la personne d'un précurseur de Platon, le philosophe Protagoras » ; — que l'Italien Ardigo refuse à Comte la paternité du Positivisme qu'il attribue à Galilée ; — que le Français E. Renan déclarait naguère dans un discours académique, qu' « Auguste Comte lui semblait, le plus souvent, répéter en mauvais style ce qu'ont pensé et dit avant lui en très bon style, Descartes, d'Alembert, Condorcet, Laplace ». — Il ne subsiste rien de ces réclamations pour peu qu'on les soumette à la discussion.

Nous ne contestons pas que notre Maître ait eu des précédents, Lui-même écrivait à d'Eichtal : « Plus nous aurons de précédents, mieux nous vaudrons » ; et il a pris soin d'établir sa filiation avec Aristote, par l'intermédiaire des plus grands penseurs de chaque siècle. Toutefois, c'est peut-être aller un peu loin que d'attribuer à l'antique Protagoras la paternité du Positivisme, et nous goûtons fort la manière dont le père Gruber se raille de l'érudition du savant Germanique : « Pour amener une si grande découverte », dit-il, « on a dû évidemment recourir à toutes les ressources de la philologie. Il fallait tout d'abord du faux Protagoras, que Platon met en scène dans ses écrits, dégager péniblement le vrai Protagoras et le reconstituer avec intelligence. » C'est ainsi que « fort de sa trouvaille, Laas put apprendre à l'univers « étonné que le Positivisme, le dernier mot de la philosophie, « est en même temps la plus vieille de toutes les philosophies, « plus vieille même que les doctrines vénérables de Platon et « d'Aristote. » (*Auguste Comte, sa vie, sa doctrine*, p. 4). — Il ne nous paraît pas qu'il y ait lieu d'insister davantage.

Passons à la thèse soutenue par Ardigo. Assurément Comte n'a pas inventé la méthode positive ; elle a été pratiquée antérieurement à lui non seulement par Galilée, mais par tous les grands savants échelonnés entre Thalès et Bichat. Seulement, il est le premier à l'avoir appliquée systématiquement à l'étude des phénomènes sociaux et moraux, à l'avoir explicitement formulée, à avoir tracé les règles de son emploi dans chaque cas, à l'avoir présentée enfin comme une discipline générale de l'esprit. Si donc il n'en est pas le fondateur, en tant que méthode spéciale utilisée dans tel ou tel domaine des sciences inorganiques et de la biologie, il en est bien le fondateur en tant que méthode générale. « Les deux philosophes qui, après Comte,



ont exercé le plus d'influence sur le mouvement positiviste. J. Stuart Mill et Herbert Spencer, s'accordent à reconnaître ce rôle décisif de l'auteur du *Cours de Philosophie positive*. » (Ollé-Laprune.)

En ce qui concerne les affirmations de Renan, nous reconnaissons volontiers que les philosophes dont il évoque les noms ont préparé la voie à Comte, ont été, si l'on veut, ses précurseurs. Et celui-ci a si peu méconnu leur rôle qu'il a pris soin de louer Laplace, comme il convenait, dans l'une des leçons de son *Cours de philosophie*, qu'il a fait figurer les noms de Descartes, de d'Alembert, de Condorcet dans le Calendrier positiviste institué pour la glorification systématique de tous les grands serviteurs de l'Humanité, et qu'il a placé les œuvres capitales de deux d'entre eux dans la Bibliothèque positiviste. — Mais aucun de ces philosophes, pas plus qu'aucun autre, n'a trouvé *la loi des trois états* à peine entrevue par Turgot, ni le principe de la classification des sciences, ni cette merveilleuse systématisation de la philosophie de toutes les sciences, objet de l'admiration de Stuart Mill, ni enfin la synthèse subjective. Chez pas un d'eux on ne rencontre le Positivisme. Sans doute, on peut rencontrer des passages qui, à un coup d'œil superficiel, semblent empiéter sur l'œuvre de Comte. « En réalité ils n'y empiètent point. On le reconnaît à trois caractères : le premier, c'est qu'ils sont fragmentaires et ne dépendent pas d'une conception générale qui en soit l'origine ; le second, c'est qu'ils sont indiscernables au milieu des erreurs et des contradictions, tant que la philosophie positive d'Auguste Comte ne vient pas en indiquer la place et la liaison ; le troisième, c'est qu'ils sont absolument stériles tant pour les contemporains que pour les successeurs aussi longtemps que l'utilité particulière n'en est pas révélée par l'utilité générale de la philosophie positive. On a beau les rapprocher, les combiner, les résumer, on ne peut rien en tirer. Comme ils ne sont pas la conclusion d'un système qui les ait précédés, il est impossible de remonter d'eux à un système. Ils ne renferment pas une doctrine qu'ils soient capables de donner ; au contraire, ils sont réellement inclus dans une doctrine qui, trouvée, les donnera... Le système n'est nulle part ; il n'est que dans M. Comte ; chez lui seulement on trouve la raison de ces passages qui n'en ont point dans leur place primitive ». (E. Littré, *Auguste Comte et la Philosophie positive*, p. 100.)

Quant à la prétention de plusieurs agnostiques anglais, comme Herbert Spencer, Huxley et Leslie Stephen, que leur Positivisme

à eux est absolument indépendant de celui du philosophe français, — Lewes, ami d'H. Spencer (*History of philosophy*, conclusion), Littré (*La Philosophie positive*, t. XVII, p. 453), Frédéric Harrison (*Revue occidentale*, janvier 1885 et nos suivantes) en ont fait justice à l'aide d'arguments qui paraissent irréfutables non seulement aux positivistes, mais à tous les critiques qui ont étudié la question comme le père Gruber, MM. de Roberty, Paulhan, etc.

Du reste, Huxley qui a tant déclamé contre la philosophie de Comte a reconnu lui-même sa dépendance vis-à-vis du philosophe français en écrivant ces lignes : — « Les ouvrages de Comte m'ont fait voir que l'on peut organiser la société sur une nouvelle base purement scientifique. Je lui en serai toujours très reconnaissant, et je lui saurai toujours gré de m'avoir fait comprendre que cette nouvelle organisation était le seul but qu'il fallait tâcher d'atteindre. » (Voir *Revue occidentale*, de mai 1890, p. 221).

De même Herbert Spencer, malgré qu'il ait prétendu n'avoir connu Comte que par oui-dire, s'est contredit lui-même dans ce passage de son *Etude de la Sociologie* : — « M. Comte est le premier qui ait bien montré la liaison entre la science de la vie (la Biologie) et la science des sociétés (la Sociologie). Il a vu que les phénomènes qui ont lieu dans des groupes d'hommes associés sont semblables à ceux qui se passent dans des groupes d'êtres inférieurs, et que dans les deux cas, il faut étudier les individus d'abord, afin de comprendre les groupes dont ils font partie. C'est pourquoi il a placé la Biologie avant la Sociologie dans sa classification des sciences. Il a compris que les études biologiques sont nécessaires avant d'entreprendre l'étude de la Sociologie. Cette étude préliminaire est en effet nécessaire, non seulement parce qu'il faut étudier l'individu avant d'aborder l'étude de l'espèce, mais en outre parce que les méthodes de la biologie doivent être employées dans l'étude de la Sociologie. Il a montré ce rapprochement dans différents passages de ses ouvrages, et ses raisonnements sont très bien conduits. Nous devons admirer la grandeur de la découverte faite par Comte. Sa méthode de voir les phénomènes est vraiment philosophique. Quoique ses premiers chapitres sur la Sociologie renferment des idées particulières que je ne puis admettre, ils contiennent bien des pensées qui sont vraies, en même temps que larges et fécondes, et tout le volume révèle une largeur et une profondeur d'esprit qui surpassent tout ce qui avait été écrit antérieurement sur ce sujet. Sa méthode de concevoir les

« phénomènes sociaux est bien supérieure à toutes les méthodes précédentes ; et sa grande supériorité consiste surtout à montrer que la Sociologie doit être fondée sur la Biologie. »

Mentionnons enfin le cas de M. Taine qui, sur l'une des pages du premier volume de l'exemplaire du *Cours de Philosophie positive*, appartenant à la Bibliothèque nationale, aurait écrit cette réflexion impertinente : « Ici, je ne comprends plus et je m'endors ». — Que reste-t-il aujourd'hui de ce dédain de normalien vaniteux ? — Nous n'avons qu'à nous adresser à M. Emile Faguet pour le savoir. Quelques jours après la mort de l'homme qui avait été son maître, il écrivait ces lignes dans la *Revue bleue* (11 mars 1893) : « Ramasser des faits et en tirer quelques lois plus ou moins certaines et toutes relatives, voilà le droit et voilà aussi le devoir du philosophe. Taine ne voyait rien et se refusait de rien voir au-delà. C'est qu'il était un philosophe positiviste, un positiviste pur, un positiviste sans mysticisme », etc... — De son côté, le père Gruber écrivait vers la même époque : « En tout et partout, Taine se montre essentiellement positiviste ». — Nous n'acceptons d'ailleurs ce jugement qu'avec réserve, car s'il est vrai que tout ce qui a de la valeur dans l'œuvre de Taine est emprunté à Comte ou dérive de Comte, celui-ci ne saurait encourir aucune responsabilité pour tant d'opinions absurdes émises par son superficiel disciple, notamment sur la Révolution française.

En tout cas, « de tout cela il ressort clairement qu'Auguste Comte est bien le véritable fondateur du Positivisme. C'est bien lui, en effet, qui a donné la première et la plus énergique impulsion à ce courant positiviste si répandu de nos jours, et qui a joué le rôle prépondérant dans le grand mouvement intellectuel qui, plus que tout autre, caractérise notre époque ». (H. Gruber.)

Dans l'ordre scientifique, s'il a nécessairement peu influé sur les sciences déjà constituées, il a exercé une influence énorme sur le développement de la Biologie qui venait d'être fondée par Bichat, en inspirant directement, tout au moins en France, les principaux agents de l'évolution biologique : — Broussais, le grand rénovateur de la pathologie, qui fut un des auditeurs du cours de *Philosophie positive* ; — Claude Bernard, dont l'*Introduction à l'étude de la médecine expérimentale*, publiée en 1865, n'est que la répétition et l'illustration de la leçon consacrée, 30 ans auparavant, par Comte à la Méthode en Biologie (1) ; l'his-

(1) « La part de Cl. Bernard, sur le terrain de la doctrine, se réduit

tologiste Ch. Robin, dont les admirables travaux d'anatomie générale n'ont encore été égalés que par les belles études de M. Bard (de Lyon) sur la Spécificité cellulaire (1); — l'illustre Charcot qui, en fondant la physiologie du système nerveux sur sa pathologie, a mis en pratique une méthode dont Auguste Comte avait prévu la fécondité et tracé les règles dès 1834; — Ch. Bouchard (2), le successeur de Broussais et le fondateur de la pathologie générale positive, qui a exploité, avec le succès que l'on sait, la même méthode *clinique*, et qui a définitivement chassé la métaphysique de la médecine en faisant de l'entité *diathèse* un simple trouble de la nutrition, héréditaire ou acquis; — Bouley, l'ancien président de l'Académie des sciences; — Pouchet, le regretté professeur du Muséum; — Lacassagne, le savant professeur de médecine légale de l'Université de Lyon, auteur d'un *Traité* positiviste d'hygiène; — les aliénistes Cotard et Ant. Ritti; — Dastre, l'embryologiste; — les professeurs d'anatomie et de physiologie, Farabœuf et Mathias Duval; — les agrégés médecins ou chirurgiens des hôpitaux de Paris, Hallopeau, Paul Segond, Albaran, Pierre Delbet; — le naturaliste Fernand Lataste; — Cadiat, Variot, Louis Dor, Bertillon père et fils, Adrien Pozzi, etc... — Ajoutons que les idées de Comte, vulgarisées dans le monde médical par le *Dictionnaire de médecine* de Littré et Robin, ont modifié, dans le sens positiviste, quantité d'esprits qui ne s'en doutent pas toujours.

notablement, il faut bien l'avouer, si l'on veut rendre équitable celle d'Auguste Comte. On ne peut pas accuser celui-ci de rester confiné dans la métaphysique. Il s'établit fermement et reste dans l'enceinte de la science; il sait à la fois poser de solides principes scientifiques et s'y maintenir dans l'application. Il soumet, lui aussi, tous les phénomènes à des lois invariables; il réclame des explications positives de ces phénomènes, ce qui veut dire la détermination des conditions qui les produisent, en rejetant, comme Cl. Bernard encore, la recherche du *pourquoi*, des causes *premières* et des causes *finales*. Comme ce dernier enfin, il considère tous les actes de la vie organique comme essentiellement physico-chimiques en tenant compte des milieux extérieurs et intérieurs, et en reconnaissant la nature spéciale des propriétés des tissus vivants. *Tous les principes essentiels de la doctrine de Cl. Bernard sont là.* » (Dr Dechambre in *article Déterminisme du Dictionnaire Encyclopédique des Sciences médicales.*)

(1) C. Hillemand, *Introduction à l'Etude de la Spécificité cellulaire chez l'homme*, in-8° de 90 pages (Steinheil, éditeur), voir pages 42 et suivantes.

(2) « J'ai lu Auguste Comte en 1858, et j'y ai puisé, pour l'étude et pour la recherche, des habitudes d'esprit, une sorte de discipline intellectuelle qui, je crois, m'ont été utiles. Après un tiers de siècle, je ne regrette pas cette initiation. » (Ch. Bouchard.)

En ce qui concerne les autres sciences qui suivent la Biologie dans la série, la Sociologie et la Morale, il n'y a pas lieu d'insister sur le rôle de Comte, puisque c'est lui qui les a constituées à l'état scientifique avec leurs méthodes propres et leurs principes. Tous ceux qui, depuis, les ont cultivées scientifiquement, dérivent évidemment de lui.

Dans le domaine de la littérature et de l'art, son influence paraît moins marquée, ce qui se conçoit parfaitement, si l'on réfléchit que l'art (dans ce mot je comprends la littérature) est rarement précurseur, qu'il a pour habitude d'éclairer les couchers de civilisation plutôt que les levers, comme le prouvent les exemples d'Homère, d'Eschyle, de Phidias, de Virgile, des auteurs anonymes de nos cathédrales gothiques, du Dante, du Tasse, de Michel-Ange, de Raphaël, de Cervantès, etc..., qui, tous, ont exprimé et interprété presque exclusivement des états de civilisation, ou disparus, ou près de disparaître, ou du moins déjà anciens et bien nettement caractérisés.

Or, la forme positiviste de la civilisation de l'avenir étant à peine ébauchée, il n'est pas étonnant que jusqu'à présent elle ait eu peu d'interprètes. Cependant, elle a trouvé son chantre en la personne du poète portugais Théophilo Braga, qui a consacré à sa glorification et à son idéalisation quatre volumes de vers que mon ignorance de la langue portugaise m'interdit malheureusement d'apprécier. De plus, n'oublions pas que l'œuvre entière de George Eliot, la grande poétesse et romancière anglaise, est animée d'un bout à l'autre du souffle positiviste; — que ce souffle anime aussi, en maints passages de ses œuvres, le grand poète Sully-Prudhomme; — que du Positivisme également se sont inspirés, en partie, des poètes ou littérateurs comme Sainte-Beuve, Emile Zola, de Pommairols, de Pompery, Paul Arène, Anatole France (qui a puisé dans Comte sa conception des grands Romains), etc...; des critiques d'art ou des artistes, comme Pierre Petroz, Viollet-le-Duc, Etex, Lucien Arreat, Ferdinand Brunetière (dont le cours sur l'Évolution de la poésie lyrique en France dérive de la conception de la destination sociale de l'art, pour la première fois, explicitement formulée par Comte), etc...

En politique, son action a encore été plus puissante qu'en philosophie, en science, en littérature, ce qui n'est pas étonnant puisque la *Philosophie positive* ne constitue qu'un préambule à la *Politique positive* : le but de Comte ayant toujours été de

remédier à l'anarchie des sociétés modernes, par l'institution d'un nouvel art politique fondé sur la science.

En fait, le plus grand nombre des populations occidentales ont subi l'influence de ses idées sociales et politiques, et celles-ci se sont plus ou moins incarnées dans des personnalités influentes.

On n'est pas sans se souvenir que, il y a quelques années, le Brésil a passé de l'état monarchique à l'état républicain sous l'impulsion prépondérante d'hommes politiques, entièrement positivistes, tels que Benjamin Constant, Bothello de Magalães, le véritable fondateur de la République, Sylva Jardim, le hardi tribun populaire, Demetrio-Ribeiro qui fut ministre de l'agriculture dans le premier cabinet républicain, Urbano Marcondes, etc..

Dans un pays voisin, au Chili, le Positivisme a compté au nombre de ses représentants un ministre de l'intérieur, Lastarria, auteur de la *Política positiva*.

Son influence est considérable en Colombie.

Au Mexique, il est la philosophie des classes dirigeantes et son influence règne en maîtresse dans les hautes sphères politiques, grâce à la fondation à Mexico, par le Dr Gabino-Barreda, de la *Escuela Nacional preparatoria*, sorte d'Ecole polytechnique agrandie, dans laquelle se trouvent enseignées toutes les sciences, depuis la Mathématique jusqu'à la Morale, d'après la classification et la méthode de Comte, et qui fournit à la magistrature, au barreau, à la médecine, à l'armée, à l'industrie, à l'administration, au professorat, etc...

Dans l'Amérique du Nord, le président de la plus puissante fédération ouvrière des Etats-Unis, la Fédération du travail, était en 1889, notre coreligionnaire Mac Grégor, membre de la Société des Humanistes de New-York.

Au Portugal, en Espagne, la plupart des chefs républicains sont positivistes.

En Angleterre, M. John Morley, l'ancien Sous-Secrétaire d'Etat pour l'Irlande, est un disciple de Comte.

En Italie, la plupart des professeurs d'Universités, dont nous avons énuméré les noms au chapitre philosophique, sont également membres du Parlement.

De même pour l'empire d'Autriche-Hongrie, où les professeurs de Prague que nous avons cités sont aussi les directeurs du parti Jeune-Tchèque.

En Suède, le député Hedin et plusieurs de ses collègues de

l'extrême gauche prétent, en toute circonstance, leur appui au chef positiviste Anton Nyström.

En Hollande, le Positivisme a eu pour principal représentant politique un ministre de la guerre, le général comte de Limbourg-Stirum.

Nous pouvons revendiquer encore, comme disciples de Comte : César de Paepe, naguère le chef du socialisme belge; Ahmed-Riza, chef du parti de la jeune Turquie, et dont le journal *Mechveret* se publie avec la devise : *Ordre et Progrès*, etc....

En France, ceux qui ont subi, à des degrés divers, l'influence du Positivisme, dans les milieux politiques du Parlement, du Conseil municipal de Paris, de la Presse, de l'Administration, sont trop nombreux pour qu'il soit possible d'en tenter l'énumération complète.

Rappelons seulement que le grand Carnot, à la veille de mourir sur la terre étrangère, avait adressé à notre Maître « ses augustes encouragements » pour sa découverte des lois sociologiques, et contentons-nous de citer de mémoire, parmi ceux qui ont subi l'influence de Comte, de Littré, de Pierre Laffitte ou d'autres positivistes : — MM. Aimelafille ou Aimel, Emmanuel Arène, Aulard, Barbezieux, Berthelot, A. Boll, Léon Bourgeois, Henri Brisson, Burdeau, Caduc, Hippolyte Carnot, Cazot, Chapon, Clémenceau, Deandreis, E. Delbet, Henri Deloncle, Deluns-Montaut, Léon Donnat, Antonin Dubost, Charles Dupuy, Joseph Fabre, Theophile Fabre, Maurice Faure, Charles Ferry, Jules Ferry, Ferrouillat, Gambetta, Grimannelli, Paschal Grousset, général Iung, Clément Janin, Joffrin, A. Lavertujon, Th. Lefebvre, Léonce Levraud, Leygues, Benoist Malon, Naquet, Panchioni, Abel Peyrouton, Pichon, Poincarré, Raiga, Ranc, Raynal, Albert Regnard, Joseph Reinach, Jules Roche, Spuller, Paul Strauss, Hippolyte Stupuy, Thulié, Tournier, Vorbe, Waldeck-Rousseau, etc....

On voit par cette simple énumération, assurément très incomplète, que l'influence politique du Positivisme s'est exercée sur des hommes appartenant aux fractions les plus opposées de l'opinion républicaine. Et cette généralité d'influence s'est manifestée d'une façon saisissante, lors de la fondation au Collège de France de la chaire de l'*Histoire des sciences*, pour M. Laffitte. Préparée de longue main par M. Antonin Dubost, hardiment proposée par M. Léon Bourgeois, ministre de l'instruction publique, acceptée par M. Charles Dupuy, président de la Commission du Budget, la création de la chaire, avec sa destination spéciale, fut votée par la presque unanimité des républicains dans le Parle-

ment, et chaudement appuyée et approuvée par la presque totalité des journaux républicains de Paris et de la province.

Au premier abord, ces accointances du Positivisme avec des hommes animés d'aspirations fort différentes peuvent paraître étranges, mais elles se conçoivent très bien pour peu que l'on réfléchisse.

Selon l'expression de M. Laffitte, « c'est, en effet, un privilège du caractère réel et relatif du Positivisme, de pouvoir être, en toute conscience, accepté et appliqué, en partie, par des hommes qui n'en acceptent pas l'ensemble ».

On comprend fort bien que les socialistes puisent une partie de leurs inspirations dans le Positivisme, qui a proclamé le caractère social de la richesse et qui se propose comme but de socialiser *moralement* aussi bien le capital que le travail, l'industrie, la science, l'art et toutes les fonctions quelconques.

Il est non moins facile de comprendre que les radicaux sympathisent avec le Positivisme, puisque celui-ci, tout en rendant hommage aux services provisoires rendus dans le passé à la cause du progrès par la théologie, la guerre et la royauté, vise à les éliminer radicalement de l'organisation moderne de la société, et à leur substituer un régime non seulement républicain, mais scientifique, industriel et pacifique. De plus, tout comme les radicaux, les positivistes se réclament de la Révolution française et considèrent comme parfaitement légitime son œuvre de destruction, y compris l'exécution de l'infâme Louis XVI, coupable de trahison vis-à-vis de l'étranger (1), et de l'indigne Marie-Antoi-

(1) L'exécution de Louis XVI n'était pas moins légitime que politique, et pas moins opportune que nécessaire. — Il avait pactisé avec l'ennemi de la Constitution et de la France, au dehors comme au dedans. Il correspondait avec l'étranger et empêchait par tous les moyens à sa disposition l'organisation de la défense nationale afin de livrer le pays. — Cela est prouvé, aujourd'hui, malgré ses dénégations mensongères, inouïes, devant la Convention nationale, lors du procès. — Mais dès cette époque même, les pièces trouvées dans les bureaux de l'intendant de la Liste civile, signées de sa main pour la plupart, mettaient hors de doute ses relations secrètes avec l'émigration et la coalition européenne, ses correspondances inconstitutionnelles avec les princes de sa famille et les membres les plus compromis du clergé réfractaire, son accord intime, constant et criminel avec ses frères devenus les chefs de l'émigration et qu'il feignait de désavouer en public, tandis qu'il les dirigeait et les poussait en secret, enfin les projets et les actes les plus décisifs contre la patrie et contre la Révolution. *Rapport de Louis-Jérôme Gohier, député d'Ille-et-Vilaine, sur les papiers inventoriés dans les bureaux de la Liste civile, fait à la séance du 16 septembre 1792;*



nette. Seulement les positivistes considèrent l'œuvre de destruction comme terminée et pensent qu'il est désormais urgent de reconstruire, tandis que les radicaux, jugeant l'œuvre de démolition inachevée, poussent à la destruction presque complète de toutes les bases de l'organisation sociale.

Toutefois, il est un parti qui, plus que tout autre, a subi l'imprégnation positiviste, comme on peut s'en rendre compte par l'énumération précédente, c'est le Parti Opportuniste.

On peut vraiment dire de lui qu'il est fils du Positivisme, sans vouloir prétendre par là qu'il applique toujours les principes posi-

broch. in-8°. — *Rapport fait à la Convention nationale, en décembre 1792 et janvier 1793*, par Philippe Rühl, député du Bas-Rhin. — *Recueil des pièces justificatives, de l'acte énonciatif des crimes de Louis-Capet, réunies par la Commission des Vingt-et-un, réimprimé par ordre de la Convention nationale*; 1 vol. in-8°. — *Exposition des motifs d'après lesquels l'Assemblée nationale a proclamé la convocation d'une Convention nationale, et prononcé la suspension du pouvoir exécutif entre les mains du roi*; broch. in-8°, de l'Imprimerie nationale, 1792. — *Recueil de pièces trouvées dans le secrétaire du roi, chez MM. de Montmorin, Laporte, intendant de la Liste civile, d'Abancourt, ex-ministre, et à l'hôtel Massias, etc., etc.* — *Histoire impartiale du procès de Louis XVI, par Jouffret, homme de loi*; 8 vol. in-8°, 1793. — *Histoire diplomatique de l'Europe pendant la Révolution française*, par F. de Bourgoing; 3 v. in-8°, Michel Lévy, Paris, 1871. — *Le comte de Fersen et la Cour de France*; 2 vol. in-8°. Firmin-Didot, Paris, 1878.)

Non content des arrangements qu'il avait pris avec les coalisés par l'intermédiaire de ses frères ou des nobles émigrés, Louis XVI, *chef suprême de l'armée*, écrivait lui-même à l'empereur d'Autriche, le 3 décembre 1791, *qu'il ne comptait plus, pour reprendre son pouvoir absolu, que sur une guerre malheureuse pour la France!* Et la reine, en mars 1792, *livrait nos plans de campagne à l'ennemi*; elle écrivait à Mercy : « ... Dumouriez, ne doutant plus de l'accord des puissances par la marche des troupes, a le projet de commencer ici le premier par une attaque de la Savoie et une autre par le pays de Liège. C'est l'armée de Lafayette qui doit servir à cette dernière attaque. *Voici le résultat du Conseil d'hier; il est bon de connaître ce projet pour se tenir sur ses gardes et prendre les mesures convenables.* Selon les apparences, cela se fera promptement. (Marie-Antoinette, Léopold et Joseph II, correspondance publiée par MM. d'Arneht et Geoffroy.)

En même temps, la découverte et les révélations de l'armoire de fer, en établissant l'action corruptrice de la Cour envers tous les partis, notamment à l'égard de Mirabeau, les intrigues les plus coupables avec Talon, et le concert le plus criminel avec Bouillé, déjà sous la Constituante, autorisaient toutes les accusations. — C'est à la mort de Mirabeau, qui conspirait avec la Cour la ruine de Paris et de la Révolution, que Louis XVI comprit qu'aucun secours ne pouvait plus lui venir du dedans et qu'il se tourna irrévocablement vers l'étranger.

Chacun se rappelle le manifeste de Brunswick, et l'indignation vengeresse qu'il souleva dans la France entière. (*Déclaration que Son Altesse sérénissime le Duc régnant de Brunswick-Lunebourg, commandant des armées coalisées de Leurs Majestés l'Empereur et le Roi de Prusse, adresse aux habitants de la France.* — Coblenz, 1792). Ce que l'on connaît moins, ce sont les paroles

tivistes et qu'il mette en pratique les solutions que nous préconisons.

Maintes fois, opportunistes et positivistes se sont trouvés en désaccord, notamment sur la question économique et financière, à propos de laquelle les seconds ont reproché aux premiers de pousser à l'instabilité économique, à la consommation, au gaspillage des capitaux, au lieu d'encourager l'épargne et de pratiquer eux-mêmes l'économie dans la gestion des deniers publics.

Il est vrai qu'à ce point de vue radicaux et opportunistes se valent et méritent les mêmes critiques.

d'exécration dont le wigh Sheridan, l'ami de Fox, dans le parlement anglais, flétrit cet acte féroce : « ... Cet odieux outrage fait à tous les sentiments de l'humanité, ce méprisable tissu d'orgueil, de folie et d'inhumanité, qui a endurci le cœur et troublé le cerveau de tous les Français jusqu'à la rage, *aiguisé le poignard des assassins de septembre et la hache suspendue en ce moment sur la tête d'un monarque infortuné !* » Mais ce que Sheridan ne savait pas, et ce qu'un trop grand nombre de Français ignore encore à cette heure, c'est que ce document si tristement célèbre n'était point et ne fut jamais l'œuvre du généralissime de la coalition, mais celle du « monarque infortuné » lui-même, de ce Louis, qui, aux yeux de tant de gens, passe toujours pour le père et pour le bienfaiteur de son peuple. — Brunswick n'avait fait que signer et endosser cette lettre de change exterminatrice tirée par le roi de France sur les rois coalisés contre la France elle-même, pièce écrite d'abord par Mallet-Dupan, revue, corrigée et augmentée par le roi, amplifiée par un émigré, M. de Limon, un protégé de Calonne, et acceptée par Leurs Majestés prussienne et autrichienne. (Voir le détail de cette révélation capitale dans *l'Histoire diplomatique de l'Europe pendant la Révolution française*, par M. de Bourgoing, ancien secrétaire d'ambassade; 2<sup>e</sup> partie, t. 1<sup>er</sup>, p. 143 à 153.)

En voici un extrait :

« C'est dans ces vues que moi, le soussigné général, commandant en chef les deux armées, déclare :

« Ceux des gardes nationales qui auront combattu contre les troupes des deux Cours alliées et qui seront pris les armes à la main seront traités en ennemis et punis comme rebelles à leur roi et comme perturbateurs du repos public....

«..... Les habitants des villes, bourgs et villages qui oseraient se défendre contre les troupes de LL. MM. impériale et royale, et tirer sur elles, soit en rase campagne, soit par les fenêtres, portes et ouvertures de leurs maisons, seront punis sur-le-champ, suivant la rigueur du droit de la guerre, et leurs maisons démolies ou brûlées....

«..... 8<sup>o</sup> La ville de Paris et tous ses habitants sans distinction seront tenus de se soumettre sur-le-champ et sans délai au roi, de mettre ce prince en pleine et entière liberté, et de lui assurer, ainsi qu'à toutes les personnes royales, l'inviolabilité et le respect auxquels le droit de la nature et des gens oblige les sujets envers leurs souverains. LL. MM. impériale et royale rendent responsables de tous les événements, sur leurs têtes, et pour être jugés militairement sans espoir de pardon, tous les membres de l'Assemblée nationale, du Département, du District, de

Les uns et les autres partent de ce principe faux, en honneur sous l'Empire, qu'une société s'enrichit en dépensant, principe qui suppose la méconnaissance complète des notions les plus élémentaires de la saine Economie sociale.

En effet, les capitaux économiques ne tombent pas du ciel, mais résultent de ces deux circonstances : 1° que chaque homme peut produire et produit effectivement, dans la généralité des cas, plus que l'équivalent de ce qu'il consomme personnellement; 2° que les matériaux produits peuvent durer, et durent effectivement dans la généralité des cas, plus de temps qu'il n'est nécessaire pour leur reproduction. Chaque génération peut ainsi produire plus qu'elle ne consomme, et l'excédent de la production sur la consommation représente le capital, condition sacrée du loisir matériel et conséquemment de tous les progrès intellectuels.

Il s'ensuit que, si la production est un facteur important de la richesse, la conservation des produits ou l'épargne représente un facteur non moins important, d'autant plus que les ressources de

la Municipalité et de la Garde nationale de Paris, juges de paix et tous autres qu'il appartiendra. Déclarent en outre LL. dites MM. sur leur foi et parole d'empereur et de roi que, si le château des Tuileries est forcé ou insulté, que s'il est fait la moindre violence, le moindre outrage à LL. MM. le roi et la reine et à la famille royale, s'il n'est pas pourvu immédiatement à leur sûreté, à leur conservation et à leur liberté, elles en tireront une vengeance exemplaire et à jamais mémorable, en livrant la ville de Paris à une exécution militaire et à une subversion totale, et les révoltés coupables d'attentats aux supplices qu'ils auront mérités..... »

C'est M. de Bourgoing qui nous a appris avec le plus de détail que ce « manifeste n'est en réalité que le développement peu adroit des instructions et du mémoire confié par le roi au journaliste genevois (Mallet-Dupan), où, notamment, la menace contre Paris est indiquée de la façon la plus explicite. »

Et c'est à ce propos que Louis XVI consumma le mensonge public le plus osé qui ait été commis peut-être, en s'apitoyant, dans son message du 3 août 1792 à l'Assemblée législative, sur les malheurs qu'allait entraîner pour la France une guerre qu'il avait lui-même fomentée et qu'il n'avait cessé de solliciter des puissances étrangères; en reniant le manifeste du duc de Brunswick, qu'il avait dicté et corrigé de sa main; en affirmant son amour pour ce peuple de Paris qu'il sortait de vouer à l'extermination, aux outrages et à la férocité des soldats allemands.

Louis XVI s'était donc bien réellement rendu coupable envers la France de ce que, dans son langage indigné et patriotique, le cardinal de Richelieu appelait « le plus sale de tous les crimes » : la trahison politique; de ce que, dans son énergique attachement au bien public, ce grand ministre faisait inflexiblement punir de mort!

la planète ne sont pas illimitées comme on peut le constater pour certains produits minéraux comme la houille, ou organiques comme l'édredon, etc.

L'épargne est même un facteur si important de la formation du capital que la nation française doit sa richesse non pas à la supériorité de sa production, inférieure à celle de beaucoup d'autres pays, mais à ses habitudes d'économie.

Or, c'est malheureusement à détruire cet élément de la prospérité nationale que les opportunistes (suivis en cela par les radicaux) tendent plus ou moins inconsciemment, en s'ingéniant à créer pour la population des occasions de dépenser et de consommer (1), et en donnant l'exemple du gaspillage par des entreprises insensées de travaux publics (2) qui justifieraient, pour un fils de famille, l'interdiction.

Sous l'influence de ces excitations et de ces exemples, l'opinion

Voilà pour la légitimité de la poursuite et du verdict de condamnation.

D'autre part, il était utile, indispensable de montrer que le nouveau gouvernement, la République, était réellement capable de se faire respecter, de briser le prestige théocratique et de le subordonner à l'intérêt social. A ce point de vue, aucune argutie de jurisprudence et de légalité ne pouvait prévaloir contre la raison d'Etat.

Nous le répétons, toute l'éloquence de Desèze ne pouvait changer cette triste vérité que les réformes arrachées à Louis par la force des événements, non consenties par lui de plein gré, étaient en même temps reniées par lui-même en lui-même, à la manière des Jésuites, et qu'il se promettait, en les accordant, de les reprendre bientôt par la force, *au moyen de l'étranger*.

— « Il se trouvait conduit fatalement à cette conséquence, dit M. de Bourgoing, fatale à lui-même et à son parti, de fonder tout son espoir sur le succès de la coalition. » (Pierre Laffitte, *la Révolution française*).

(1) Signalons les encouragements accordés à ces scandaleuses fêtes, dites de charité, dans lesquelles on dépense par exemple 300,000 francs (sur lesquels 200,000 représentent ou des substances consommées sans besoin, ou des matériaux détruits sans utilité, ou du travail humain gâché) pour recueillir un boni de 100,000 francs, qu'on distribue ensuite à tous les miséreux qui se présentent, sans s'inquiéter si leur misère est méritée ou imméritée.

(2) Le cas de la future Exposition est typique à cet égard. On a dépensé des millions à construire les divers palais du Champ de Mars; on a dépensé d'autres millions à les entretenir depuis 1889 en vue de leur utilisation pour 1900. Néanmoins, le principal objectif des organisateurs de cette future Exposition a été de les démolir et de démolir en même temps le palais de l'Industrie aux Champs-Élysées, au lieu de les utiliser en les modifiant, s'il y a lieu, et cela, à un moment où la France se débat dans les difficultés financières les plus graves.

publique en est venue à mésestimer le riche *économe* et à honorer le riche *dissipateur*, sous prétexte que celui-ci fait aller le commerce et l'industrie comme si l'autre ne les faisait pas forcément prospérer aussi. Il n'y a plus guère d'avares qui conservent bêtement leur or dans un bas de laine. Les gens économes savent placer leurs économies en actions ou obligations industrielles, et ils fournissent ainsi les moyens de construire des routes, des canaux, des chemins de fer, des usines, etc., qui servent à la société. La seule différence entre le riche dissipateur et le riche économe est donc que le premier fait aller le commerce, et principalement le commerce de luxe, en consommant et en détruisant beaucoup, tandis que le second fait aller le commerce et l'industrie, surtout le commerce et les industries utiles, en se privant et en consommant peu. En résumé, l'avare ne fait de tort qu'à lui-même, tandis que le noceur porte préjudice à la société en consommant, sans utilité, pour sa satisfaction personnelle, des capitaux qui permettraient de vivre à tant de malheureux qui travaillent. Ses charités elles-mêmes sont le plus souvent des crimes, car, s'adressant généralement aux mendiants de profession, elles augmentent le nombre des parasites dont finalement les prolétaires supportent la charge, puisque ce sont eux qui fournissent au reste de la société de quoi manger, se loger, se vêtir, etc. Lorsque le noceur se double d'un oisif et d'un improductif, il devient la dernière des canailles.

Sous le bénéfice de ces réserves qui prouvent que l'Ecole positiviste ne saurait s'encadrer dans aucun parti, nous devons reconnaître cependant que le parti opportuniste est celui qui s'est le plus inspiré de la méthode, de l'esprit de relativité, des points de vue généraux du Positivisme, et surtout de cette conception fondamentale que le *Progrès ne peut consister que dans le développement de l'Ordre*.

En maintes occasions, ses chefs ont d'ailleurs reconnu leur filiation avec Comte et son École.

Dès 1870, le glorieux fondateur de l'Opportunisme, Gambetta, manifestait hautement ses préférences positivistes, en chargeant Littré, qui était à cette époque le disciple le plus réputé de notre Maître, d'un cours d'Histoire des sciences à l'Ecole polytechnique de Bordeaux.

Le 20 juin 1874, dans le discours-programme qu'il prononça à Bordeaux, à son retour de Saint-Sébastien, il disait déjà, à propos de la refonte totale de notre pays, et en demandant à la science le moyen de cette haute transformation : — « Oui, fai-

« sons appel aux savants : qu'ils prennent l'initiative ! C'est eux qui  
 « doivent hâter le plus puissamment notre restauration morale  
 « et nationale. Mais si nous voulons que la régénération soit ra-  
 « pide, il faut ne plus se défier des intelligences à peine éveillées ;  
 « il faut ne pas craindre de distribuer dans les collèges et dans  
 « les écoles toute la vérité. Il faut résolument savoir et résolu-  
 « ment pratiquer que ce sont les vérités supérieures de la science  
 « et de la raison qui saisissent le mieux les jeunes intelligences ;  
 « et c'est pour cela qu'un des grands penseurs de ce siècle, Au-  
 « guste Comte, faisait commencer l'instruction par les sciences  
 « exactes. »

Un peu plus tard, en 1873, au banquet qui fut offert à Littré, à l'occasion de l'achèvement de son Dictionnaire de la langue française, il portait le toast suivant : — « Messieurs et chers amis, *ce n'est pas d'aujourd'hui* que j'ai reçu l'initiation à cette sévère et sûre méthode dont tout à l'heure on rappelait les titres et les services qu'elle a déjà rendus, et qu'elle est surtout appelée à rendre à la cause de la science en général et de la civilisation française en particulier..... Comme on l'a dit, c'est par la vulgarisation de la méthode fondamentale de sa doctrine qu'on pourra arriver à remettre la civilisation occidentale à son vrai rang, sur sa véritable base, et que nous pourrons espérer d'en avoir fini avec les luttes brutales, avec les entreprises violentes ; c'est grâce à cette méthode qu'on ne poursuivra désormais le progrès que par l'éducation systématique et rationnelle des peuples de notre continent, de manière à les amener à ne régler leurs rapports que par les principes communs et par les lois de cette solidarité supérieure qui substitue le règne du droit aux entreprises toujours ruineuses de la force..... Ce jour-là votre philosophie — *la nôtre*, aura vaincu, » etc....

Le 12 décembre 1880, à l'occasion de la célébration du cinquantième de l'Association polytechnique, dont Auguste Comte avait été l'un des fondateurs, il s'écriait : — « C'est, Messieurs, cette méthode sévère dans son principe, plus sévère encore dans son application, que traçait, au début même de votre Association, *le plus grand penseur du siècle*. Pourquoi ne le dirais-je pas ici même, dans cette Sorbonne longtemps vouée à un autre idéal et à d'autres doctrines, mais qui, grâce à l'effort du temps et au concours d'hommes nouveaux et d'esperts généreux — je me permettrai cet éloge devant le représentant le plus autorisé de l'Université de Paris — se dégage

« peu à peu des ombres du passé pour regarder vers l'avenir et  
« jeter les bases d'une véritable science positive : cette méthode,  
« sévèrement tracée, plus sévèrement pratiquée, *telle a été la*  
« *philosophie du plus puissant penseur du siècle*, comme je  
« le disais, *celui dont les idées pénètrent aujourd'hui partout :*  
« *d'Auguste Comte !.....* Le but suprême, c'est le progrès dont  
« la définition a été donnée par le philosophe éminent qui a tracé  
« votre première charte. Qu'est-ce que le progrès ? *C'est le dé-*  
« *veloppement de l'ordre.* »

Enfin dans la réunion solennelle que la *Ligue française de l'Enseignement* tint au Trocadéro, le 21 avril 1884, Gambetta insistait de nouveau sur la nécessité de « l'éducation positive » à partir même de l'Ecole primaire. — « Il faudra bien, du moment  
« où vous voulez instruire le suffrage universel et faire des  
« hommes éclairés pour faire des électeurs intelligents, il faudra  
« bien que vous leur donniez une *éducation positive*, c'est-à-  
« dire une éducation qui bannisse la chimère, l'absolu et le so-  
« phisme, une éducation qui ne soit faite que de la moelle des  
« lions ; et la moelle des lions, qu'est-ce dans notre siècle ? C'est  
« le résultat de toutes les sciences pures. » (*Bulletin de la Ligue française de l'Enseignement*, 1884, vol. 1, p. 445).

Gambetta mort, on remarque chez son successeur, le grand Ferry, le même soin d'attester qu'il n'est pas un politicien empirique et qu'il se rattache à la grande École de Comte. Cette préoccupation se retrouve dans bon nombre de ses discours.

Avant qu'il prit la direction du parti opportuniste, il avait, du reste, déjà affirmé ses opinions à ce sujet, à l'occasion de l'anniversaire de la réception de Littré dans la Franc-maçonnerie, en déclarant que « la sociabilité, qui n'est pas autre chose que le  
« nom scientifique de la fraternité, que la sociabilité est capable  
« de se suffire à elle-même ; cela veut dire », ajoutait-il, « que  
« la morale sociale a ses garanties, ses racines dans la conscience  
« humaine, qu'elle peut vivre seule, qu'elle peut enfin jeter ses  
« béquilles théologiques, et marcher librement à la conquête du  
« monde. C'est là votre foi (il s'adresse aux francs-maçons), c'est  
« votre instinct séculaire, et c'est précisément tout le fond du  
« Positivisme. Pour le Positivisme, la morale est un fait essen-  
« tiellement humain et distinct de toute croyance sur le commen-  
« cement et la fin des choses. La morale est un fait social qui  
« porte en lui-même son commencement et sa fin..... Si la ma-  
« çonnerie vit, depuis qu'elle existe, sur l'instinct du progrès  
« humain, j'ose dire que la philosophie positive en a fait la dé-

« monstration scientifique... Quand on est animé de cette conviction (que l'Humanité progresse constamment, que la charité prend de plus en plus le pas sur l'égoïsme individuel), quand l'Humanité nous apparaît, non plus comme une race déchue, frappée de décadence originelle, et se traînant péniblement dans une vallée de larmes, mais comme un cortège sans fin, qui marche en avant vers la lumière, alors on se sent partie intégrante du *Grand Être* qui ne peut périr, de cette Humanité incessamment grandie, sauvée, améliorée; alors on a conçu toute la liberté, car on est affranchi de la crainte de la mort.... » (*Chaine d'union*, 1877, p. 101).

Beaucoup plus tard, lorsqu'il prit la direction de l'*Estafette*, il lui imposa la devise positiviste *Ordre et Progrès*, et il choisit un positiviste pour Rédacteur en chef. Aussi peut-on dire que jusqu'à la fin de sa carrière, l'*Estafette* fut non pas, sans doute, l'organe du Positivisme, mais un organe positiviste.

On se rappelle qu'au moment de sa mort tous les journaux signalèrent ce fait que les ouvrages de Comte figuraient parmi les livres familiers qu'il consultait chaque jour. On sait moins qu'en ces tristes jours M. Pierre Laffitte fut sollicité, de la part de la veuve et du frère de l'illustre mort, d'apprécier sa vie, devant son cercueil, au palais du Luxembourg, et que, si notre chef ne se rendit pas à ce désir, c'est qu'il en fut empêché par des circonstances indépendantes de sa volonté. Quelques mois après, lorsque la nouvelle Direction de l'*Estafette* jugea à propos d'éliminer de la rédaction du journal deux de ses rédacteurs positivistes, MM. Peyrouton et Lefebvre, et de remplacer sa devise « *Ordre et Progrès* » par une phrase du testament de Jules Ferry, la famille de ce dernier intervint à nouveau pour inviter le directeur à ne plus s'autoriser du nom de Ferry, du moment qu'il avait changé l'inspiration positiviste de son ancien organe.

Quoique M. Casimir-Périer n'ait point, à ma connaissance, parlé une seule fois du Positivisme en termes suffisamment explicites pour qu'on puisse le ranger parmi les disciples avoués de Comte, l'ensemble de ses discours et de ses actes, le choix caractéristique de ses collaborateurs dans la constitution de son ministère — le plus remarquable qu'on ait vu depuis les ministères Gambetta - Waldeck-Rousseau et Ferry - Waldeck-Rousseau — autorisent à penser que lui aussi allait demander à l'enseignement de Comte et de son École ses principales inspirations.

C'est que tous les véritables hommes d'Etat comprennent la nécessité de s'appuyer sur une doctrine systématique et réelle



qui éclaire leurs pas et qui les empêche de verser dans l'empirisme.

En tout cas, la filiation de l'Opportunisme au Positivisme, hautement proclamée par Gambetta et Ferry, qu'on peut supposer, avec beaucoup de vraisemblance, avoir été implicitement admise par M. Casimir-Périer, a été de nouveau reconnue et indirectement affirmée, au mois de juillet dernier, par M. Waldeck-Rousseau, ce qui ne surprendra aucun de ceux qui connaissent la clairvoyance et la hauteur de vues de l'ancien collaborateur préféré de Gambetta et de Jules Ferry.

Il semble qu'il ait tenu, — au moment de prendre, en quelque sorte officiellement, la direction du parti opportuniste, vacante depuis la retraite de M. Casimir-Perir, — à indiquer où il comptait puiser ses inspirations, car son premier soin fut d'inviter le Directeur du Positivisme à prendre la parole au grand banquet de Saint-Mandé, offert par l'industrie et le commerce parisiens.

A défaut de M. Laffitte, retenu à Cadillac « par son grand âge et par l'état de sa santé » mais « de cœur avec les organisateurs du banquet », et après avoir consulté la Société positiviste, je crus devoir accepter de prendre la parole pour exposer, en toute liberté, la manière de voir des positivistes sur la situation politique.

Par le soin de M. Waldeck-Rousseau, mon discours fut publié dans *l'Estafette* du 11 juillet, en même temps que le sien et qu'une allocution pleine de bon sens de M. Vert, maire du XX<sup>e</sup> arrondissement, affirmant la solidarité du patronat et du prolétariat.

La *Revue Occidentale* reproduit ci-dessous, en même temps que mon discours, le compte rendu du *Petit Journal*, et les parties les plus caractéristiques de l'éloquent discours de M. Waldeck-Rousseau : C. H.

## LE BANQUET DE L'INDUSTRIE ET DU COMMERCE PARISIENS

*Extrait du Petit Journal, du 9 juillet 1896.*

Un grand banquet a été offert hier soir au Salon des familles, à M. Waldeck-Rousseau, par l'Industrie et le Commerce parisiens. Six cents convives y assistaient.

M. Vert, maire du vingtième arrondissement, présidait, ayant à sa droite M. Waldeck-Rousseau, et à sa gauche le Dr Hillemand, délégué des positivistes.

Parmi les convives : MM. Deluns-Montaud, Aymard, Yves Guyot, Alcide Dussolier, Poirrier, Trarieux, Thorel, Guérin, Cordelet, Las-

serre, Joseph Reinach, Demagny, Barboux, Albert Félix, chef du Cabinet de M. Turrel, Audiffred, Coquelin cadet, Expert-Besançon, etc., etc.

Au nom de l'ancien Comité Gambetta et des industriels et commerçants parisiens, M. Vert porte la santé de M. Waldeck-Rousseau . . . . .

M. Waldeck-Rousseau prend ensuite la parole . . . . .

Son discours, qui n'a pas duré moins d'une heure, a, à plusieurs reprises, été coupé par les applaudissements.

A onze heures, le Dr Hillemand a pris la parole; après son discours quelques toasts ont encore été portés.

#### DISCOURS DE M. WALDECK-ROUSSEAU

« Je ne redoute que médiocrement la diffusion pratique et la mise en œuvre de la doctrine collectiviste, à laquelle on faisait allusion tout à l'heure: je la vois condamnée par le sentiment de son impuissance à ne point sortir du domaine des abstractions métaphysiques: elle se heurte non pas seulement à la raison mais encore à l'instinct.

« Et ce n'est pas dans un pays, où plus de 10,000 Sociétés de secours mutuels, en dépit des incertitudes qu'on a trop longtemps laissé peser sur elles, ont patiemment accumulé un capital de 230 millions, ce n'est pas dans ce pays où la rente française est répartie entre plus de quatre millions de porteurs, où les Caisses d'épargne gardent un trésor de 3 milliards, qu'on peut craindre de voir entrer dans la pratique un communisme nouveau, ce nouvel ancien régime, dont les deux termes les plus prochains seraient tout à la fois la servitude et la ruine.

« L'Etat devient le seul propriétaire, le seul industriel et le seul commerçant; il absorbe l'usine, le comptoir, l'atelier; sur un peuple d'ouvriers d'Etat s'élève un peuple nouveau de fonctionnaires.

« Et comme il faudra se rendre compte des mérites de chacun, des aptitudes de chacun, attribuer à chacun la somme de produits correspondant à ses besoins, comme on comprend que l'Etat ne suffirait pas à la tâche, on laisse apercevoir et tout le monde voit poindre des oligarchies tyranniques, chargées d'enseigner à l'Etat son devoir, dont il est aisé de prévoir que la justice distributive deviendrait la plus intolérable des servitudes et placerait bientôt le travail entre le favoritisme et l'arbitraire.

« Voilà donc le rêve que le siècle de la Révolution léguerait au vingtième siècle! Je ne le redoute pas. Mais ce qu'il faut craindre, disons-le, ce sont les effets plus proclamés d'une doctrine essentiellement dissolvante. C'est d'abord, et au premier plan, l'arrêt immédiat du progrès. A quoi bon travailler, épargner quand il existe de par le monde des magiciens qui peuvent le transformer d'un seul coup de baguette.

« Ce qu'il faut craindre, surtout, c'est le réveil qui suit le songe, ce sont les colères qui succèdent aux désillusions et c'est le geste

de fureur qui pourrait bien interrompre le dernier couplet de la nouvelle chanson.

« Messieurs, l'esprit socialiste n'est pas d'aujourd'hui. Je ne dirais pas seulement que les socialistes actuels n'ont rien inventé; mais, encore au risque de blesser leur amour-propre, je les trouve extrêmement inférieurs, et comme instruction et comme invention, à leurs prédécesseurs de 1848. La tendance socialiste n'est que l'exagération jusqu'à l'impossibilité d'un instinct inné chez l'homme qui porte à réagir contre l'inégalité des conditions avec d'autant plus de force que la civilisation se montre plus active; ce qui est nouveau c'est de voir tant d'hommes se tourner vers l'Etat, tout attendre de lui, tout, sauf l'indépendance, et se montrer altérés non pas de plus de liberté mais de plus de servitude.

« Il y a là un état d'esprit, fait de déceptions et de crédulité, qui vaut bien qu'on s'y arrête.

« Il tient pour une grande part à une politique de promesses qui n'a mesuré ses engagements ni à ses forces, ni à ses connaissances, ni au temps qui lui était assigné, ni à la résistance naturelle des choses, mais seulement à l'utilité de promettre plus qu'aucun autre n'avait promis.

« Je ne crois pas qu'il soit une des transformations miraculeuses auxquelles des écrivains ingénieux ont fait place dans le royaume d'Utopie qui, peu à peu, n'ait trouvé place dans le formulaire chaque jour plus étendu des programmes électoraux.

« Notre scepticisme, bien informé, sait ce qu'il faut penser de cette abondance, ce qu'il en faut rabattre, mais il ne faut jamais oublier que les masses populaires sont, elles, de bonne foi, elles croient d'autant plus facilement tout ce qui leur est promis, qu'elles ont plus de raisons de l'espérer.

« Elles boivent à longs traits, suivant l'expression de Challemeil-Lacour, le vin et l'on pourrait dire l'alcool frelaté des vaines promesses. Le nuage si lourd qui pèse sur elles se déchire et, comme en une évocation, elles aperçoivent de merveilleux horizons: l'Etat peut tout! Puis les jours passent, et après les jours passent les années, rien ne change; le travail est tout aussi pénible, la chimère insaisissable se dérobe aux mains tendues vers elle, la colère fermentée, et, dans la fournaise de l'atelier comme dans les ténèbres de la mine, une autre pensée se dégage: le gouvernement ne fait rien!

« L'Etat peut tout, le gouvernement ne fait rien, voilà les deux formules qui, sous une forme moins précise et moins brutale, travaillent, à l'heure actuelle, de nombreux esprits, toute une partie de la démocratie française.

« Comment réagir et quel peut être le remède! Il consiste, si je ne me trompe, à opposer à ce que je viens d'appeler la politique des promesses une politique de bonne foi. Elle ne consiste point à circonscrire le progrès, mais les limites dans lesquelles seulement il peut s'opérer et qui ne sont pas autres que les limites de la liberté individuelle.

« Je ne préconise pas la politique du laissez-faire. Je crois que l'Etat a des devoirs, de grands devoirs, mais il faut définir, pour contribuer à dissiper des malentendus funestes, la sphère d'action

dans laquelle ces devoirs peuvent être accomplis. Le devoir de l'Etat est d'éveiller les initiatives, de favoriser leur expansion, de les porter à leur maximum de puissance, de leur donner ce que les ingénieurs appellent le maximum de l'effet utile. Voilà où commence et voilà où finit l'action et le rôle de l'Etat. . . .

« Quand j'aurai indiqué, messieurs, que le rôle de l'Etat est encore de coordonner toute cette législation d'épargne et de prévoyance qui, depuis si longtemps, exerce l'attention du législateur et que, pour cela, c'est encore à la liberté et non à la contrainte qu'il faut faire appel, et qu'il suffirait presque de développer la législation de 1850, de 1856, de 1868, sur les retraites pour la vieillesse, les assurances en cas de décès, en cas d'accident, en cas d'incapacité de travail, j'aurai, je crois, montré que la tâche de l'Etat reste singulièrement grande et complexe et que, sans sortir de ses attributions, elle offre à l'intelligence et à l'effort des hommes politiques un champ assez vaste pour que leur activité puisse s'y exercer pendant de longues années encore.

« Voilà ce que peut promettre une politique de bonne foi.

« Nous ne promettons à personne de changer du jour au lendemain la face du monde ; nous ne dirons pas à ceux qui souffrent que nous savons les secrets qui suppriment la souffrance ; nous ne dirons pas que, grâce à nous, l'inégalité des conditions va disparaître.

« L'inégalité, messieurs, suivant une parole qui n'est que trop juste et trop forte, « est un fait de nature et non de civilisation ». L'humanité l'a trouvée dans son berceau ; elle accompagne l'homme, collée à ses flancs et jusque dans la mort, tantôt cruelle et tantôt clémente, tantôt glorieuse et tantôt obscure, elle met son sceau impitoyable sur sa destinée.

« Mais du moins, messieurs, nous n'aurons trompé personne. Et quand on s'adresse à ceux qui travaillent et qui peinent, l'erreur est déjà coupable ; le mensonge est la plus basse des scélératesses.

Messieurs, l'état d'esprit que je me suis efforcé d'analyser, le danger d'un affaiblissement de la foi politique, ne tiennent pas seulement à une fausse conception des devoirs et des pouvoirs de l'Etat. Ils tiennent encore au spectacle, qu'ont donné, surtout ces dernières années, de la vanité des efforts parlementaires et à la démonstration hélas ! vivante que l'on peut concilier ces deux choses en apparence irréconciliables : une stérilité relative et une agitation perpétuelle.

« Des partis qui s'épuisent à chercher de nouvelles raisons sociales, des cabinets vacillant dès l'origine et bientôt — vous le disiez il y a une minute — jetés les uns sur les autres, un immense travail parlementaire, faisant affluer les matériaux de toute sorte sous la meule des Chambres qui ne peut pas les broyer, des œuvres abandonnées à l'état d'ébauche pour entreprendre de nouveaux ouvrages qui ne seront pas achevés... voilà quelques-uns des traits par lesquels on aime à peindre ce qu'on appelle le régime parlementaire et ce qu'il serait plus juste d'appeler un certain parlementarisme.

« On accuse alors la Constitution !

« Mais ce qu'il faudrait accuser, c'est une déviation continue, persévérante, de la pensée constitutionnelle. C'est l'exagération d'un des pouvoirs publics portée jusqu'à la pléthore, c'est la dépression d'un autre pouvoir public poussée jusqu'à l'atrophie.

« Il est arrivé que par la vertu d'un mot détourné de son sens, en accusant d'être autoritaire une doctrine politique qui réclamait pour le pouvoir exécutif dans des conditions nettement définies, sous un contrôle permanent, la liberté dans sa sphère d'action, on a peu à peu institué sinon ouvertement et en doctrine, tout au moins dans une pratique discrète et voilée, des gouvernements sans autorité.

« Celui-ci a dit : le moins de gouvernement possible ! celui-là a parlé de déférence tournée bientôt en effacement. C'est avec une entière bonne foi qu'on a cru par là servir la liberté et il s'est trouvé que c'est par l'affaiblissement de toute autorité et par les réactions qui en résultent que, il y a peu d'années, la cause même de la liberté s'est trouvée menacée.

« On a formé des combinaisons en vue de durer et non plus en vue d'agir : on a formé des programmes comme formaient des patoilles ceux qui tentaient autrefois la fortune de la mer.

« Mais de tous les moyens employés, le plus néfaste a été de laisser aux pouvoirs élus l'administration tout entière. Est-il, à l'heure où je parle, un fonctionnaire, grand ou petit, haut ou humble qui ait été librement choisi par ceux-là qui doivent en répondre ? Est-il une nomination, un avancement ou un changement qui ne soient pas recommandés ? Eh bien, si cela est, ne cherchez pas ailleurs les causes du mal dont nous souffrons, car par cette perversion, c'est l'esprit électoral qui peu à peu s'empare de tous les rouages. C'est l'art de se faire réélire qui triomphe, et, paradoxe singulier et presque outrageant ! le mandat qui est confié par le suffrage universel s'emploie à le circonvenir et à le cerner.

« Ce n'est pas d'une indigence d'idées que nous souffrons, c'est d'une insuffisance dans l'action. Or, l'action, pour qu'elle soit continue et efficace, ne peut procéder que d'un gouvernement homogène, résolu, assez désintéressé, serviteur assez dévoué de la démocratie pour que, le jour où l'appareil gouvernemental se ralentit et s'arrête, s'il arrive que, vainement sollicité, il retombe sans cesse au point mort, il ne craigne pas de remonter à la source de tout pouvoir et de rendre la parole au suffrage universel lui-même.

M. Waldeck-Rousseau a terminé son éloquent discours qui a eu un immense succès d'audition, par un appel au Suffrage universel et au Droit de dissolution, inscrit dans la Constitution. Plusieurs positivistes ont vu, dans les paroles qu'il a prononcées à ce sujet, une déclaration en faveur du *Referendum* ou du *Plébiscite*. Nous ne croyons pas que telle ait été la pensée de M. Waldeck-Rousseau ; et rien, dans son passé, n'autorise à supposer, un seul instant, qu'il puisse, à la manière des vulgaires

démocrates, considérer le Suffrage universel comme une sorte d'oracle infaillible devant lequel il n'y a qu'à s'incliner respectueusement. Le nouveau Chef de l'Opportunisme est trop de son temps pour voir dans le Suffrage universel autre chose qu'un simple procédé, destiné à faire surgir les pouvoirs publics, et offrant, dans notre situation, plus d'avantages que l'hérédité, mais n'étant pas cependant sans de graves inconvénients qu'il est du devoir des hommes politiques de chercher à atténuer. — Du reste, M. Waldeck-Rousseau tiendra assurément à s'expliquer sur ce point, et toute discussion devient, dès lors, superflue.

C. H.

#### DISCOURS DU D<sup>r</sup> CONSTANT HILLEMANT (1)

Messieurs,

En tant qu'appartenant à une école philosophique, l'Ecole positiviste, dont les principes fondamentaux ont, d'une façon générale, inspiré la politique de Gambetta et de Jules Ferry, je me permets de prendre la parole ce soir pour tâcher, à la lumière de la science sociale, de jeter quelques clartés sur la situation du parti qu'ils ont fondé, et sur les mesures à prendre pour lui faire obtenir tout le crédit qu'il devrait avoir auprès de l'opinion publique.

Aux yeux des disciples de Comte et de Pierre Laffitte, le parti opportuniste souffre de deux choses : *en premier lieu*, d'une équivoque qui n'a pas cessé de planer sur lui depuis son origine ; *en second lieu*, d'un germe de désorganisation qui s'est introduit dans son sein lors de la chute du ministère Ferry, au lendemain de la panique de Lang-Son.

L'Equivoque est celle-ci :

Alors que les hommes d'Etat opportunistes s'inspirent presque exclusivement dans leur pratique gouvernementale des seuls enseignements de la science sociale, ils continuent malencontreusement à se servir, en tant qu'orateurs et qu'écrivains, des vieilles formules de la métaphysique révolutionnaire, d'où une contradiction apparente entre les discours et les actes qui semble justifier, au regard des foules, les accusations de duplicité portées par les adversaires.

Cette contradiction tient, elle-même, à la différence de la situation dans laquelle est né et a grandi le parti républicain, et de la situation dans laquelle les événements l'ont placé depuis près de vingt ans.

(1) La présente reproduction contient quelques développements que j'avais cru devoir supprimer dans le texte communiqué à l'*Estafette* du 11 juillet, pour ne pas encombrer les colonnes du journal.

A bien considérer, le parti républicain est né en 1789 de la nécessité de poursuivre — en même temps que la destruction du système catholico-féodal, incompatible avec le développement de la civilisation moderne — le renversement d'une royauté qui, depuis la seconde moitié du règne de Louis XIV, avait cessé d'être progressive et était devenue à ce point rétrograde de prendre sous sa protection le clergé et l'aristocratie féodale qu'elle avait autrefois combattus, avec le concours du Tiers-Etat, aux époques mémorables de Louis VI, de Philippe le Bel, de Louis XI, de Henri IV, de Richelieu.

Pour atteindre ce résultat, les républicains durent se servir des armes qui étaient à leur portée, et parmi ces armes se trouvait la formidable machine de guerre qui avait été préparée par les philosophes du XVIII<sup>e</sup> siècle : la *Doctrine révolutionnaire* avec ses formules retentissantes, *Liberté, Egalité, Souveraineté et Infaillibilité du peuple*, formules acceptées par une opinion publique déjà puissante.

Cette doctrine, purement critique, n'était en réalité qu'une généralisation et une systématisation, sous forme d'*absolu métaphysique*, des protestations suscitées par un régime ne reposant plus depuis longtemps que sur l'arbitraire et le privilège. Mais une telle systématisation offrait l'avantage de fortifier les diverses revendications sociales, en leur donnant pour bases des dogmes, intangibles par définition, logiquement liés ensemble, et qui, pour être irrationnels, l'étaient encore moins que les dogmes théologiques sur lesquels reposait l'ancienne organisation politique qu'il s'agissait d'abattre.

En invoquant le dogme métaphysique de la *Liberté absolue de conscience* contre le dogme théologique de la Foi en la révélation chrétienne, les républicains trouvèrent le moyen efficace d'entraîner à leur suite tous ceux-là — huguenots, israélites, déistes, athées — qui luttèrent déjà contre le droit odieux que s'était attribué le Catholicisme, de persécuter, avec l'aide de la puissance temporelle, quiconque ne pensait pas comme lui.

En invoquant le dogme d'une *Liberté politique complète*, ils purent aisément rallier sous leur drapeau toutes les victimes ou simplement tous les adversaires de l'arbitraire royal et féodal.

En se réclamant du dogme de l'*Egalité absolue*, ils réussirent sans peine à gagner à leur cause tous ceux qui avaient à se plaindre des privilèges injustifiés accordés aux prêtres et aux nobles ou que choquait le spectacle d'inégalités *illégitimes*, sans destination sociale et affranchies de tout frein moral.

En se couvrant du dogme de la *Souveraineté et de l'Infaillibilité populaires*, ils décidèrent plus facilement les masses à appuyer leurs protestations contre la méconnaissance, par la royauté héréditaire, des intérêts généraux de la nation, contre son incapacité croissante

à gérer ces intérêts et contre la consécration traditionnelle en la cathédrale de Reims, de cette incapacité, par une Eglise se prétendant infaillible.

Et c'est en coordonnant ainsi tous les efforts, en ralliant toutes les bonnes volontés à l'aide de cette Doctrine, provisoirement identifiée avec la forme républicaine du gouvernement, que nos pères purent réussir à détruire l'ancien régime, malgré l'appui qui lui fut prêté par la plupart des vieilles monarchies de l'Europe.

Lorsque l'œuvre de la Révolution sembla plus tard menacée par le retour des Bourbons, que, plus tard encore, elle parut compromise par la royauté de 1830, le second Empire et la Présidence du maréchal de Mac-Mahon, l'emploi de la Doctrine révolutionnaire trouva encore un semblant d'opportunité et fut peut-être même de quelque utilité réelle pour combattre les dernières réactions.

Mais depuis l'avortement du coup d'Etat du 16 mai la situation a radicalement changé, et on peut dire qu'il ne reste plus aucun vestige des choses contre lesquelles protestaient nos pères et contre lesquelles ils avaient raison de protester.

Plus de religion d'Etat ! car Dieu a définitivement cessé d'être d'ordre public pour devenir exclusivement d'ordre privé, et il est à la portée de tous les citoyens français de vivre et de mourir sans avoir recours, une seule fois durant leur existence, à aucune des religions théologiques encore provisoirement subventionnées par l'Etat.

Plus d'arbitraire féodal ou royal à craindre.

Plus de castes contre lesquelles protester au nom de l'Egalité, depuis que l'aristocratie féodale, décimée par les exécutions de la Révolution, ruinée par la confiscation légitime des biens des émigrés, n'est plus représentée que par quelques familles nobiliaires, sans prestige, sans influence et incapables d'exciter l'envie de qui que ce soit, tant leur déchéance sociale est profonde.

Plus de classes privilégiées à combattre depuis que la Révolution de 1848 a supprimé les avantages politiques concédés à la richesse par la monarchie censitaire de Louis-Philippe.

Nous n'avons plus même de roi, élu de Dieu, *in partibus*, qui puisse servir de prétexte à des protestations au nom de la Souveraineté et de l'Infaillibilité du peuple, depuis que le comte de Paris et le duc d'Orléans, désavoués par la papauté, ont été réduits à faire appel, de leur côté, à cette souveraineté populaire au nom de laquelle fut guillotiné Louis XVI.

En aucun cas, d'ailleurs, il ne saurait être question de lutter sérieusement contre l'Infaillibilité de l'Eglise à une époque où l'autorité ecclésiastique a dû renoncer presque complètement à l'usage séculaire de l'excommunication des livres hérétiques, pour ne pas contribuer à leur succès.



On peut donc avancer, sans crainte d'être démenti par les faits, que depuis plus de quinze ans la Doctrine révolutionnaire est devenue absolument sans objet.

Par suite, nous avons autre chose à faire qu'à répéter nos pères, nous avons à continuer leur œuvre. L'opération préliminaire de destruction des forces anciennes étant accomplie, il nous reste à organiser, à coordonner toutes les forces modernes, issues du prodigieux développement de la science, de l'art, de l'industrie.

Or, vous savez comme moi qu'il est d'usage, dans l'industrie du bâtiment, d'abandonner les engins de démolition qui ont servi à mettre bas quelque vieille mesure, sitôt qu'il s'agit de construire à la place un nouvel édifice. On abandonne alors la pioche pour le fil à plomb, la truelle et les autres instruments appropriés à la construction.

Il semble *a priori* qu'il devrait en être de même en politique. Et, en fait, l'histoire de tout un siècle est là pour témoigner que la Doctrine révolutionnaire, si puissante pour détruire, est restée impuissante chaque fois qu'il s'est agi de reconstruire.

Si les hommes d'Etat de la Révolution ont échoué dans leur œuvre de réorganisation, c'est qu'ils ont cherché à édifier le nouvel ordre public à l'aide précisément de la doctrine essentiellement négative qui avait servi à démolir l'ancien, et qui était malheureusement la seule qu'ils eussent à leur disposition, puisque la science sociale n'était pas encore fondée.

Même remarque pour la Révolution de 1848, quoique, alors, la science sociale fût fondée par Comte, mais insuffisamment connue.

Et ces échecs successifs se comprennent facilement si l'on réfléchit que tous ces dogmes révolutionnaires, envisagés indépendamment de leur rôle transitoire de protestation contre les abus du pouvoir catholique, du pouvoir féodal et du pouvoir royal, sont radicalement faux, considérés en eux-mêmes, et parfaitement absurdes.

Il n'y a pas et il ne peut pas y avoir de liberté indéfinie, car notre liberté de penser, elle-même, est toujours limitée, non seulement par les conditions que nous subissons, du temps et du milieu social dans lesquels nous vivons, mais aussi par certaines conditions de compétence. Et quant à notre liberté individuelle d'agir, elle est singulièrement restreinte par la dépendance que nous impose, vis-à-vis d'autrui, la spécialisation des fonctions, et par l'obligation où nous sommes de concourir, d'après des lois déterminées, pour maintenir l'existence de l'organisme social dont dépend notre propre vie.

Il n'y a pas et il ne peut pas y avoir d'égalité absolue. L'observation la plus superficielle démontre qu'il y a inégalité naturelle entre les sexes, entre les âges, entre les individus de même sexe et de même âge, au point de vue physique, intellectuel et moral (1°). L'Histoire prouve que l'existence d'une société quelconque n'a jamais

pu se réaliser, sans la production de diversités et par suite d'inégalités; et elle enseigne que les progrès de la civilisation, loin de tendre à une chimérique égalité, développent de plus en plus les inégalités (2°).

Il n'y a pas et il ne peut pas y avoir de souveraineté du peuple complète, car toute société vit sous le poids de fatalités cosmologiques qu'elle ne peut supprimer; et, d'autre part, chaque génération est obligée d'accepter la situation qu'ont laissée les prédécesseurs (3°).

Prétendre enfin, avec le sophiste Rousseau, que la volonté populaire ne peut errer, est une affirmation, absurde en soi, et démentie à chaque instant par les événements depuis que la volonté populaire a trouvé à s'exprimer par l'organe du suffrage universel (4°).

Il faut donc désormais laisser de côté des formules dénuées de valeur propre et dont la situation politique n'excuse plus l'emploi, d'autant que, précisément, depuis qu'elles sont devenues inutiles, elles sont devenues nuisibles, en poussant à la négation méthodique de tout gouvernement régulier, à la destruction de toutes les bases d'une organisation politique quelconque.

Chacun a présent à l'esprit combien dangereuse peut devenir la dynamite, détournée de son usage industriel.

Or, pour quiconque observe et réfléchit, les formules de la métaphysique révolutionnaire, privées de leur destination temporaire, ayant épuisé leur action légitime, ne sont pas moins dangereuses que la dynamite, détournée de ses applications industrielles.

N'est-ce pas en effet sous le couvert du dogme de la Liberté de conscience que se développent, de jour en jour, ces habitudes de critique indéfinie d'après lesquelles chaque individu, quelle que soit son incompétence, s'investit du droit de juger de toutes les questions?

N'est-ce pas au nom du dogme de la Liberté politique que certains libéraux revendiquent les prétendus droits de l'individu contre l'Etat en faisant systématiquement abstraction des devoirs; — que les radicaux attaquent comme l'ennemi de la société tout gouvernement républicain qui veut gouverner; — que les anarchistes contestent l'utilité même de toute espèce de gouvernement?

N'est-ce pas en s'autorisant du dogme de l'Egalité absolue que l'esprit niveleur de notre époque se donne carrière contre toutes les supériorités; — qu'au mépris des distinctions établies par la nature, fortifiées par la civilisation, on tente de réaliser une impossible égalité entre l'homme et la femme; — que les fauteurs de désordre, qui vivent de l'exploitation des mécontentements de l'ouvrier, réclament la suppression du patronat et de toute espèce d'hierarchie sociale; — que communistes et collectivistes cherchent à supprimer soit la propriété individuelle, soit l'héritage de la richesse?

N'est-ce pas au nom de la Souveraineté populaire que chaque génération est incitée, sous prétexte d'améliorer son sort en révisant la Constitution, à bouleverser l'état social, sans tenir compte des lois fatales de l'évolution et sans se préoccuper des prédécesseurs et des successeurs (5°) ?

N'est-ce pas enfin en se réclamant de l'Infaillibilité du peuple qui les a choisis que nos députés les plus notoirement incapables s'octroient le droit de mettre en échec les hommes d'Etat supérieurs qui surgissent à côté d'eux, et prétendent remplacer par des associations de médiocres des hommes de génie comme un Gambetta ou un Ferry ?

Messieurs, à l'Aristote moderne, à l'immortel fondateur de l'Ecole positiviste, à Auguste Comte, revient l'honneur d'avoir établi historiquement cette impuissance de la doctrine révolutionnaire à construire quoi que ce soit, et d'avoir signalé l'absurdité et les propriétés anti-sociales de chacun de ses dogmes.

Mais à lui aussi revient l'honneur encore plus grand d'avoir dégagé, de l'étude positive des faits sociaux, de nouvelles formules scientifiques, susceptibles de diriger la conduite des hommes d'Etat dignes de ce nom.

En appliquant à la Politique la méthode, si avantageusement exploitée dans le domaine de la Cosmologie et de la Biologie, il a irréfutablement établi que, plus un organisme social se différencie et se complique, plus la dépendance relative de ses diverses parties augmente, en devenant de moins en moins arbitraire ; et plus s'impose la nécessité d'un gouvernement temporel et d'un gouvernement spirituel, organes de la réaction de l'ensemble sur les parties, l'un ou l'autre fortement constitué, qui règlent ces relations de dépendance réciproque (6°).

Il a prouvé que l'objectif de toute bonne organisation sociale est de favoriser la production de toutes les inégalités avantageuses à la société, en assurant de mieux en mieux les conditions de leur existence, de leur fonctionnement et de leur concours.

Il a montré qu'il existe des fatalités non seulement cosmologiques mais aussi sociologiques qu'il n'est pas plus au pouvoir des assemblées qu'au pouvoir des rois de supprimer ; -- qu'obligés de subir ces fatalités nous n'avons d'autre moyen de nous garantir des effets nuisibles des unes qu'en leur opposant les effets utiles des autres ; que la première condition de l'art politique est donc de les découvrir et de les peser toutes, de façon à savoir tantôt neutraliser les unes en nous servant des autres, tantôt nous modifier nous-mêmes pour nous adapter à celles dont les conséquences sont immodifiables (7°).

Enfin, tout en reconnaissant au peuple le droit imprescriptible d'exprimer des *désirs*, et, à la rigueur, la capacité de faire surgir les pouvoirs publics, il a mis hors de doute l'incompétence de la

démocratie pour exprimer des *opinions*, c'est-à-dire pour trouver la solution des difficiles problèmes de la Sociologie, la plus compliquée de toutes les sciences, après la Morale.

A Gambetta, le héros de la Défense nationale, revient le mérite d'avoir le premier, parmi les hommes politiques, compris la valeur des vues du philosophe qu'il n'hésitait pas à qualifier, dans un discours célèbre, « le plus grand penseur du siècle ».

A lui revient le mérite d'avoir vulgarisé, en la faisant sienne, cette formule capitale d'Auguste Comte : « *Le progrès n'est que le développement de l'ordre* », formule qui concilie les besoins de conservation et d'amélioration, inhérents à la nature humaine, et qui substitue la notion d'évolution à la notion de révolution.

A Gambetta, enfin, revient encore le mérite d'avoir fait accepter ces idées nouvelles par le plus grand nombre des républicains qui l'entouraient, et d'avoir réussi à transformer la plus importante fraction du parti républicain, qui jusque là n'avait été qu'un parti d'opposition, en un parti organique de gouvernement, s'inspirant, sous le nom de *parti opportuniste*, de cette autre formule de Comte : « *tout est relatif, voilà le seul principe absolu* ».

Je dis que Gambetta réussit à transformer la plus importante fraction du parti républicain, mais non tout le parti républicain.

C'est que, dans tout parti comme dans toute colonne en marche, il y a toujours un certain nombre d'individus qui sont incapables d'aller à la même allure que les autres, soit parce qu'ils subissent un simple retard d'évolution, soit parce qu'ils sont frappés d'un irrémédiable arrêt de développement intellectuel. Ceux d'entre les républicains qui se trouvaient dans l'un ou dans l'autre de ces cas ne purent suivre Gambetta dans son ascension, et, comme il arrive habituellement, préférèrent douter de lui que de douter d'eux-mêmes, l'accuser de trahison plutôt que de se soupçonner d'insuffisance mentale. — Ils constituèrent le groupement *radical* et le groupement *intransigeant*, acharnés l'un et l'autre à vouloir étendre l'œuvre de destruction de la Révolution à tous les fondements de l'organisation politique, et à attaquer les républicains constructeurs avec les armes qui avaient servi à lutter contre la royauté et l'Empire.

Une des gaietés de notre situation est même d'entendre ces arriérés se poser comme les champions du progrès et se présenter comme des esprits avancés.

Quoi qu'il en soit, il faut reconnaître qu'il est parfois plus facile aux hommes de changer de conduite que de changer de langage. Et il fut très difficile à ces républicains devenus opportunistes-gouvernementaux, qui jusque-là avaient lutté dans l'opposition sous le drapeau de la doctrine révolutionnaire, de dépouiller tout à fait et tout à coup le vieil homme et, en adoptant une nouvelle conduite, d'adopter un uniforme nouveau.

Ils continuèrent à faire usage, en parlant à la population, de ces formules qui leur étaient devenues familières, et dont la creuse sonorité prête aux effets d'éloquence, sans prendre suffisamment garde qu'ils mettaient leurs actes en contradiction avec quelques-unes de leurs paroles.

Je me hâte d'ajouter qu'ils attribuaient implicitement à ces formules un sens restreint et relatif qui, à leurs yeux, les rendait inoffensives.

Venaient-ils, par exemple, à parler de *Liberté* ! ils comprenaient simplement par ce mot l'absence d'arbitraire. Venaient-ils à invoquer l'*Egalité* ! ils l'entendaient dans le sens restreint de l'égalité de tous les citoyens devant la loi civile.

Mais, Messieurs, les foules sont simplistes. Elles ont la logique étroite des enfants. Aussi, en voyant les opportunistes — vanter par exemple, d'un côté, la Liberté, et d'autre part interdire judicieusement l'exercice d'une foule de libertés et imposer non moins judicieusement une série d'obligations — vanter d'un côté l'Egalité, et d'autre part maintenir des inégalités légitimes — elles se prirent à douter de la bonne foi de ceux qui les avaient guidés jusque là, et à prêter l'oreille aux suggestions les plus malveillantes de la presse radicale.

Or, il n'est rien d'aussi désastreux pour un parti que de se laisser surprendre en flagrant délit d'inconséquence, en posture de quelqu'un qui cherche à tromper.

De là vient, sans aucun doute, cette sorte de suspicion dont est frappé le mot *opportuniste* aux yeux d'une partie de l'opinion et qui fait qu'un grand nombre de Gambettistes ont peur maintenant de se réclamer de cette étiquette, si heureusement créée par leur Maître.

Au contraire, pour nous positivistes, le discrédit croissant des opportunistes et leur faiblesse devant l'opinion publique, par rapport aux radicaux, provenant surtout de ce qu'ils paraissent inconséquents avec eux-mêmes, le meilleur moyen qui s'offre à eux de regagner la confiance ébranlée de la population est d'avoir toujours soin de mettre leurs paroles en harmonie avec leurs actes, d'avoir le courage de leurs opinions, et de ne pas craindre de déployer leurs enseignes.

Le corps électoral a suffisamment montré qu'il aimait avant tout la franchise des déclarations, la netteté des situations, la logique de la conduite.

Il nous paraît donc de toute nécessité que les héritiers de Gambetta abandonnent résolument aux radicaux, non seulement les conceptions révolutionnaires, mais encore les formules qui les résument, formules qui ont eu leur moment d'utilité, mais qui sont aujourd'hui un des principaux obstacles à la réorganisation de la société, en entretenant dans l'esprit de la démocratie les plus chimériques et les plus dangereuses illusions.

Il faut qu'ils substituent définitivement à ces formules celles de la science sociale, qu'ils les aient toujours non seulement à l'esprit mais sur les lèvres et sous la plume, chaque fois qu'ils ont à se prononcer, à adopter une ligne de conduite en face des redoutables problèmes sociaux qui se posent de nos jours.

Le plus capital de ces problèmes est sans contredit celui qu'a fait surgir le développement de la grande industrie, c'est-à-dire l'incorporation du prolétariat dans la société moderne, ou, en d'autres termes, sa participation à tous les avantages généraux que la civilisation est susceptible de procurer aux hommes et qui sont trop exclusivement le partage de quelques-uns.

Radicaux et collectivistes poursuivent ce but en s'inspirant dans leurs paroles et dans leurs actes des conceptions de la métaphysique révolutionnaire, principalement de celles relatives à l'Egalité et à la Souveraineté du peuple.

Méconnaissant les enseignements de l'Histoire, et subissant sciemment ou inconsciemment l'influence de Rousseau, ils s'imaginent que le meilleur moyen d'assurer le bonheur du prolétariat est de réduire au minimum les inégalités sociales, soit en frappant le patronat d'impôts arbitraires, soit en le supprimant, et en supprimant avec lui la propriété individuelle ou l'héritage.

Les uns et les autres, avec une égale ignorance des fatalités sociologiques et de la puissance de l'hérédité, ont l'illusion de croire qu'il leur suffirait de conquérir les pouvoirs publics et de réviser la Constitution dans le sens de leurs idées pour changer du jour au lendemain une organisation économique qui est la conséquence d'une évolution cinquante fois séculaire et pour transformer à volonté la nature humaine, façonnée par plus de 3000 ans de civilisation (8°).

Aux opportunistes il appartient de comprendre et de faire comprendre au corps électoral, par l'intermédiaire de leurs orateurs, de leurs écrivains, le caractère rétrograde et chimérique de pareilles conceptions — et ils ne le peuvent évidemment qu'à la condition de ne pas invoquer eux-mêmes les formules qui les résument, — et d'opposer à ces solutions illusoire les celles de la science sociale.

Or, au regard de la Sociologie positive et dans la réalité des choses, les inégalités sociales ne sont pas seulement des conséquences de la civilisation qu'il n'est au pouvoir d'aucune volonté populaire de supprimer, elles figurent parmi les facteurs les plus importants du progrès.

Avec la disparition de l'institution de la propriété et de celle de l'héritage, si elle était possible, disparaîtraient non seulement les précieuses conditions d'indépendance qui ont permis à Descartes et à tant d'autres de ses pareils de se livrer aux travaux théoriques les plus grands et cependant les moins susceptibles d'utilisation

pratique immédiate, mais encore toutes ces qualités fécondes en résultats sociaux, de prévoyance, d'activité, d'amour du travail, de goût de l'épargne, si péniblement acquises par la race occidentale, sous la stimulation de l'égoïsme individuel et de l'instinct paternel ou maternel (9°).

De même pour la distinction entre patrons et ouvriers qui correspond à la division entre les fonctions de direction et les fonctions d'exécution, division sans laquelle il n'existerait pas de grande industrie pour asservir la nature à l'homme, pour améliorer sans cesse les conditions de notre séjour sur la planète terrestre. Du jour où les fonctions de direction seraient remplies par des directeurs ou des fonctionnaires, au lieu de l'être par des patrons, intéressés personnellement à porter au maximum le succès de leurs entreprises, la routine et le gaspillage remplaceraient l'esprit d'initiative et l'économie, sans aucun avantage appréciable pour l'ouvrier et au grand détriment de l'intérêt public (9 bis).

Est-il besoin d'ajouter que tout impôt arbitraire sur le patronat, outre qu'il risque de tarir la source de fortune publique qu'il prétend mieux répartir, retombe toujours sur l'ouvrier qui paie, en tant que consommateur, l'augmentation des frais généraux de l'industrie ou du commerce.

Ce n'est donc pas dans les moyens préconisés par les radicaux et les collectivistes et qui visent directement ou indirectement à détruire les éléments même de la civilisation qu'on peut espérer trouver la solution du plus important des problèmes sociaux.

Elle ne peut être rationnellement cherchée que dans la considération du développement de l'ordre préexistant.

Or, si nous étudions attentivement l'évolution sociale, nous constatons que, depuis la naissance de la grande industrie, la répartition des bénéfices de la production n'a pas cessé de se faire progressivement dans le sens d'une plus équitable rémunération du travail et d'une diminution correspondante de rendement pour le capital, envisagé en lui-même, indépendamment de l'intelligence directrice qui le met en œuvre.

De cette constatation nous pouvons déduire qu'un moment viendra où, par suite de la baisse continue de l'intérêt de l'argent il sera presque impossible à une famille de vivre oisive durant plusieurs générations, avec le seul rapport du capital prêté à autrui, et où le travail sera suffisamment rémunéré pour permettre à l'ouvrier d'avoir un domicile, d'élever une famille sans être obligé d'envoyer sa femme ou ses enfants à l'usine, et d'avoir assez de loisir pour pouvoir s'assimiler les résultats généraux de l'évolution intellectuelle et morale de l'humanité, pour pouvoir goûter ses plus éminentes productions esthétiques.

Ce jour-là, le problème social sera résolu.

C'est donc à hâter l'avènement d'une pareille situation qu'il faut présentement travailler.

Mais comme le problème est international alors que les pouvoirs politiques sont nationaux, il est facile de comprendre que sa solution dépend moins de la réforme de l'organisation politique, dans un pays quelconque, que d'une réforme générale des opinions et des mœurs chez les diverses populations (10°).

Elle se trouve donc intimement liée à l'avènement d'un nouveau pouvoir spirituel, capable d'étendre son empire sur la terre entière en parlant au nom de la science qui est la même en tout lieu, et qui s'impose par la démonstration aux esprits cultivés, par les résultats aux esprits incultes.

En s'appuyant *théoriquement* sur la science sociale et sur la science morale fondées par Comte, le sacerdoce qui exercera ce pouvoir spirituel pourra répandre partout et faire partager à tous la conviction raisonnée que la richesse, sociale dans sa source, doit l'être dans sa destination, c'est-à-dire que, tout en conservant une appropriation personnelle, elle doit être employée à améliorer, par l'élévation de leurs salaires et non par des charités dégradantes, le sort des prolétaires qui contribuent à la produire (11°).

En s'appuyant *pratiquement* sur l'opinion publique régénérée par un enseignement moral commun à tous les peuples, à toutes les classes, il pourra imposer aux dirigeants comme aux exécutants l'accomplissement de leurs devoirs réciproques et de leurs devoirs envers la société.

A l'Etat *républicain* il appartient seulement de favoriser cette évolution spontanée — en augmentant ou en faisant augmenter prudemment, dans la mesure compatible avec la situation économique générale et avec la prospérité des diverses industries nationales, le salaire des ouvriers qu'il emploie directement ou indirectement par l'intermédiaire des entrepreneurs qui soumissionnent ses travaux; — en diminuant progressivement les charges de l'ouvrier par la diminution des impôts qui pèsent sur les objets de consommation de première nécessité, et en augmentant proportionnellement ceux qui frappent les objets de luxe, dont la consommation représente et mesure précisément les abus de la richesse; — en augmentant et en rendant proportionnels et progressifs, sans aller jamais jusqu'à leur donner un caractère prohibitif, les *droits de succession* qui ont l'avantage d'atteindre directement le capital, sans cependant taxer et par suite opprimer l'intelligence de l'industriel ou du commerçant qui fait valoir ce capital.

A l'Etat *républicain* il appartient encore, tant que le nouveau pouvoir spirituel qui s'ébauche ne sera pas suffisamment puissant, de protéger le développement de l'enfant et la santé de l'ouvrier, en imposant aux patrons le respect des prescriptions de l'hygiène.



Du jour où les opportunistes mettront à défendre ces opinions le courage et l'ardeur que les radicaux et les socialistes mettent à propager et à défendre leurs idées métaphysiques, ils ne tarderont pas à regagner tout le crédit qu'ils ont perdu et à rallier autour d'eux l'élite de la population, aussi bien l'élite des ouvriers que celle des commerçants et des industriels.

J'appelle maintenant votre attention sur le second point que j'ai indiqué, c'est-à-dire sur le germe de désorganisation introduit dans le sein du parti, au lendemain du désastre de Lang-Son.

Un certain nombre d'opportunistes de marque, animés, du reste, des meilleures intentions, mais effrayés des clameurs menaçantes de la rue, crurent alors habile de sacrifier le chef de l'Opportunisme pour sauver le parti, comme si l'histoire n'était pas là pour témoigner qu'en politique les lâchetés sont toujours des bêtises.

Au lieu de soutenir Ferry, ils organisèrent autour de lui la défection et concoururent délibérément à sa chute.

Ils l'empêchèrent ainsi de produire le lendemain le traité de paix conclu par ses soins avec la Chine, et de mener à bien les travaux de cette Conférence internationale que son génie diplomatique avait su réunir pour imposer à l'Angleterre l'évacuation de l'Egypte, et qui fut immédiatement licenciée par M. de Freycinet.

Par contre-coup, ils empêchèrent leur parti de recueillir devant l'opinion publique le bénéfice moral d'avoir résolu la question égyptienne, encore ouverte de nos jours, d'avoir terminé honorablement une guerre que la Chambre avait jugée nécessaire après la mort de l'imprudent commandant Rivière, dont la presque unanimité du Parlement avait voté la prolongation au lendemain du guet-apens de Bac-Né, et dont seule une défaillance dans le Commandement militaire avait compromis le succès final.

Jusque-là on avait certes vu bien des ministères opportunistes tomber sous les votes réunis des minorités d'extrême gauche et de droite; on avait vu Gambetta lui-même mis en échec par une coalition de ce genre, aidée de quelques défections. Mais le gros du parti était chaque fois resté debout, groupé autour de son chef, le drapeau à la main, et prêt à reprendre l'œuvre interrompue; ne s'interdisant pas les transactions avantageuses, mais n'entrant dans aucune de ces compromissions qui dégradent et déconsidèrent ceux qui s'y abaissent.

Au contraire, à partir du moment où fut méconnue, pour la première fois, par les opportunistes, la nécessité qui s'impose à tout parti de gouvernement, de se solidariser avec son chef, dans la mauvaise comme dans la bonne fortune, tant que ce chef n'a pas démerité, la décomposition intestine commença.

Une fois entrés dans la voie des capitulations de conscience et des compromissions, ils ne s'arrêtèrent pas en chemin.

Non seulement ils tinrent leur chef à l'écart, mais, sous le nom de politique de concentration, ils acceptèrent de se subordonner aux radicaux, c'est-à-dire à une minorité infime, suppléant à son infériorité numérique par du bruit, de l'activité, de la résolution. Tout le reste de la législature, ils subirent la domination d'une poignée d'agitateurs, ayant perpétuellement la menace et l'insulte à la bouche, et se présentant audacieusement comme les seuls organes attitrés de l'opinion publique.

Et quand vint pour eux le moment de se présenter devant le suffrage universel, ils se laissèrent conduire aux élections de 1885, comme des moutons à l'abattoir, par un ministère radical.

Toute leur habileté consista à essayer de se dissimuler sous l'étiquette de *progressistes* et à emprunter au langage et au programme de leurs adversaires de quoi compléter leur déguisement.

Au lieu de défendre leur politique coloniale, ils eurent la naïveté de demander grâce pour avoir ajouté au domaine de la patrie française trois colonies pleines d'avenir, et trois positions stratégiques aussi importantes que Bizerte, Diégo-Suarez et Haiphong.

Et ils préférèrent rejeter sur leur chef la responsabilité des quelques mécomptes intervenus, au lieu d'en rendre responsables ces coalitions, sans cesse renaissantes, de radicaux et de réactionnaires qui avaient empêché d'aboutir les projets de formation d'une armée coloniale et qui avaient ainsi obligé le grand Ferry à engager la politique coloniale, sans avoir à sa disposition l'instrument approprié à cette politique, l'armée coloniale.

Le résultat inévitable fut qu'en les voyant dans cette posture de coupables, le suffrage universel les condamna, nonobstant leur changement de costume.

Malgré qu'ils fussent revenus en moins grand nombre à la Chambre, ils auraient pu cependant, avec le concours du Sénat, influencer encore, de la façon la plus heureuse, sur la marche des affaires, en constituant une importante minorité, fortement organisée et solidement groupée autour de son chef. Mais ils aimèrent mieux laisser Ferry dans l'isolement, par crainte de se compromettre en sa compagnie, et cherchèrent à s'illusionner eux-mêmes et à illusionner les autres, en englobant sous le nom de parti de gouvernement une foule de gens n'ayant aucune communauté d'idées, aucun programme défini, et formant une majorité inconsistante, toujours prête à s'évanouir dans les moments où son concours aurait été le plus indispensable, comme lors du remplacement de M. Grévy à la présidence de la République.

Ainsi fut organisée durant quatre ans la politique du piétinement sur place, qui donna naissance, sous les auspices des radicaux, au Boulangisme, et qui eût mené la République, dirigée par eux, à la ruine, si le grand Ferry, n'écoulant que son courage, n'avait osé dénoncer publiquement le péril, à un moment où la

crainte de heurter le sentiment populaire et de n'être pas réélus fermait la bouche de tous.

Vous n'avez pas oublié comment, lâchement abandonné par une partie des siens, le chef héroïque succomba aux élections de 1889, sous les attaques combinées des radicaux, des boulangistes, des cléricaux, et dut rester éloigné du Parlement jusqu'au jour où le suffrage restreint put réparer la sottise du suffrage universel.

Pendant ce temps, les fils dégénérés de Gambetta, quoique rentrés en majorité à la Chambre, suivaient la même tactique, faite de compromissions et de capitulations de conscience perpétuelles, confondant la roublardise avec l'habileté. C'est ainsi qu'on les vit abandonner honteusement du jour au lendemain tous ceux de leurs hommes d'Etat qui, de par leurs capacités, se trouvèrent d'avantage exposés aux calomnies des ennemis de la République, intéressés à faire mousser les scandales du Panama.

Seul le Sénat introduisait quelque dignité dans la vie parlementaire, et allait sans doute prendre une part plus active à la vie politique sous la direction de Ferry, qu'il avait porté courageusement à sa présidence, lorsque, par une fatalité à jamais déplorable, celui-ci mourut, victime de la tentative d'assassinat d'un fou, inspiré par les criminelles excitations de la presse révolutionnaire.

Il s'ensuivit une augmentation du gâchis au sein du parti opportuniste qui vécut alors, au jour le jour, sans chef, sans programme, sans organe jusqu'aux élections d'août 1893.

Les radicaux, déconsidérés aux yeux de l'opinion publique par la preuve qu'ils avaient fournie, étant au pouvoir, de leur impuissance à faire aboutir aucune réforme sérieuse, échouèrent néanmoins dans la plupart des circonscriptions électorales. Mais, au lieu d'être remplacés par une majorité opportuniste, élue sur un programme commun, et susceptible de s'organiser sous la direction d'un chef, ils furent remplacés par la cohue de modérés qui siège encore au Palais-Bourbon et qui, à quelques mois de distance, nous a offert le spectacle stupéfiant de soutenir, de ses votes, les politiques les plus contradictoires et les plus irréconciliables.

C'est qu'en effet l'épithète de *modéré* peut s'appliquer tout au plus à un tempérament, à un caractère, ou plutôt à un défaut de caractère, mais ne saurait désigner de véritables hommes politiques.

Historiquement, les modérés ont toujours été des *timorés*, obéissant surtout aux suggestions de la peur, incapables, par suite, de résister aux moindres fluctuations de l'opinion publique, et se comportant au milieu des tempêtes politiques comme des épaves balottées par les flots.

Ecoutez plutôt ces paroles de Barnave : « Le parti modéré, disait-il, qui, soit par le nombre, soit par la composition, pourrait être regardé comme la nation même, est presque nul pour l'in-

fluence; il se jette, à la vérité, pour faire poids, du côté qui cherche à ralentir le mouvement, mais à peine ose-t-il expliquer publiquement son vœu. Lorsque les événements qu'il a redoutés le plus sont consommés, il y souscrit, il abandonne ses anciens chefs et ses anciens principes; et cherche seulement, dans la nouvelle marche, à former encore l'arrière-garde et à retarder la marche de la colonne révolutionnaire, à la suite de laquelle il se traîne à contre-cœur. Ce parti a toujours lâchement abandonné ses chefs... Tout ce qu'on peut en attendre, en général, ce sont des vœux secrets et quelques applaudissements lorsqu'on a vaincu pour lui. Un faible appui dans le succès, nulle ressource dans la défaite, aucun espoir de vengeance. »

Si ce portrait s'applique parfaitement aux *crapauds du marais*, qui soutinrent successivement de leurs votes les girondins, les dantonistes, les terroristes et les thermidoriens, il ne s'applique pas moins exactement aux modérés de nos jours.

Aveugles donc, ceux qui pourraient être tentés de fonder le moindre espoir sur la majorité actuelle de la Chambre !

On ne peut rien fonder sur le sable mouvant du Modérantisme.

Et cependant l'audace des ennemis de l'ordre s'accroît, à mesure que s'accuse la couardise des modérés.

La vérité est qu'il y a urgence pour les tenants de Gambetta et de Ferry à se reconstituer en un parti qui, sans repousser aucun concours — pas plus celui des modérés que celui des radicaux dits de gouvernement — sache cependant se différencier au sein de la cohue modérée, en ayant un programme défini, un ou plusieurs journaux à un sou remplissant le rôle d'organes d'Enseignement populaire supérieur en même temps que celui d'organes de polémique et d'informations, et enfin, et surtout un chef suffisamment qualifié.

Car on s'est aperçu, depuis la disparition de Ferry, de l'absurdité de cette conception démocratique d'après laquelle les principes seraient tout et les hommes rien; comme si les principes pouvaient se suffire à eux-mêmes et se passer d'hommes pour les appliquer !

On s'est rendu compte que, pour qu'une « réforme quelconque aboutisse, il faut que les idées, les sentiments, les activités qui convergent plus ou moins spontanément vers une certaine direction, trouvent enfin un organe unique qui en devienne la condensation efficace, qui les résume, qui les incarne. »

C'est pourquoi, de tous côtés, les hommes d'ordre et de progrès se sont retournés vers M. Waldeck-Rousseau, l'éminent collaborateur de Gambetta et de J. Ferry, en faisant appel à son esprit civique, à son patriotisme, pour qu'il se mette à leur tête.

Nul n'est, en effet, plus qualifié pour prendre la succession de ces grands morts, car s'ils l'ont choisi comme principal collaborateur, eux qui se connaissaient si bien en hommes, c'est qu'ils lui

ont reconnu toutes les qualités que Richelieu réclamait déjà de son temps pour faire un grand ministre d'Etat : « la *capacité* qui requiert elle-même la fermeté d'esprit, la solidité du jugement, l'étendue des connaissances ; la *probité* qui méprise les plaintes et s'attache aux effets solides dont le public peut retirer du fruit, et qui veut que le conseiller d'Etat soit à l'épreuve des calomnies, que toutes les traverses qu'on lui saurait donner ne le puissent décourager de bien faire ; le *courage* qui fait désirer et poursuivre les choses hautes avec autant d'ardeur que le jugement les embrasse avec sagesse et qui fait soutenir fortement les adversités ; l'*application* qui requiert que celui qui est attaché aux affaires publiques en fasse son principal, y soit attaché d'esprit, de pensée et d'affection. »

De plus, M. Waldeck-Rousseau est un homme heureux, et nous estimons que Mazarin n'avait pas tort de ne vouloir confier les affaires de l'Etat qu'à des mains heureuses, l'expérience démontrant que ceux qui sont constamment poursuivis par la malechance manquent de quelqu'une des qualités nécessaires pour réussir.

A lui dorénavant doit incomber le soin de diriger les troupes opportunistes, de les réorganiser, de discipliner leur action.

Mais à tous les opportunistes incombe aussi le devoir de savoir se subordonner au chef qu'ils ont librement choisi, en connaissance de cause, de ne pas lui marchander leur concours (12°), et surtout de lui faire de leurs témoignages d'estime et de reconnaissance un rempart contre les calomnies des *souteneurs* de la démagogie.

A n'en pas douter, il sera vilipendé comme l'ont été tous les grands serviteurs du pays.

A cet égard, l'Histoire ne fait que se répéter. Il y a un siècle, Danton fournissait le triste exemple d'un des plus grands et des plus honnêtes hommes d'Etat qui aient jamais existé, guillotiné au nom de la vertu.

Nous assistons de nos jours à la répétition de l'infâme comédie dont le hideux Robespierre fut l'abominable auteur, et le grand et généreux Danton, la victime.

Depuis l'établissement de la troisième République, il n'est pas un seul républicain de talent qui n'ait été indignement diffamé, traité de voleur et accusé de tous les crimes : voleur, Gambetta ! voleur, Ferry ! voleur, Rouvier ! voleur, Jules Roche ! voleur, Raynal ! voleur et assassin, Constans ! voleur ou fils de voleur, Casimir-Perier !

La calomnie n'a guère épargné que les médiocrités inoffensives,

Par suite, il ne faut donc pas se lasser de rappeler ces exemples à la démocratie, pour la mettre en garde contre ces *incorruptibles* qui, à défaut de mérite positif, se parent de toutes les vertus négatives et invérifiables, et cherchent, en exploitant la générosité des senti-

ments populaires, à jeter la suspicion, au nom de l'honnêteté, sur quiconque manifeste de l'intelligence et de la capacité.

Ainsi reconstitué — sous la direction d'un chef pouvant compter sur ses soldats et possédant lui-même leur confiance — avec un programme organique nettement défini, expurgé de tout trompe-l'œil révolutionnaire, et, quotidiennement commenté, expliqué, vulgarisé par un nombre suffisant de journaux à un sou — le parti opportuniste pourra, sans crainte, se présenter devant le suffrage universel en le mettant en demeure de choisir entre la politique métaphysique, celle des chimères, et la politique positive, celle des réalités fécondes.

#### NOTES DU DISCOURS

(1°) En ce qui concerne l'influence du siècle dans lequel nous vivons, sur notre manière de penser, elle est attestée par ce fait, signalé par Condorcet, qu'aucun penseur de l'antiquité n'a pu s'élever à la conception d'un état social qui ne fût pas basé sur l'esclavage. De même, avant Newton, aucun esprit n'avait pu s'élever à la conception de la possibilité d'une action à distance comme celle que les astres exercent entre eux, alors que, de nos jours, cette possibilité est admise sans difficulté par les cerveaux de nos collégiens. Non seulement les anciens n'avaient pas la liberté de penser ce que nous pensons, mais ils n'avaient pas davantage la liberté de sentir ce que nous sentons : leurs sentiments étaient nécessairement moins complexes que les nôtres; et la différence qui existe entre la poésie simple d'un Homère ou d'un Eschyle et la poésie si complexe d'un Byron est due principalement aux siècles qui les séparent, et durant lesquels l'âme humaine n'a cessé de se compliquer. — Quant à l'influence du *milieu*, au point de vue qui nous occupe, elle a été mise en lumière par Voltaire dans les vers fameux de *Zaire* :

J'eusse été, près du Gange, esclave des faux dieux,  
Chrétienne dans Paris, musulmane en ces lieux.

Il est universellement admis que la terre tourne autour du soleil, et cependant combien y a-t-il d'électeurs de la ville de Paris, la ville lumière, qui soient capables de fournir ou de comprendre la démonstration du phénomène. — D'ailleurs, même en supposant remplies les conditions de compétence, n'y a-t-il pas nécessité pour nous de nous en rapporter à la bonne foi d'autrui sur une foule de questions dont nous n'avons ni le temps, ni les moyens de rechercher la vérification ? Il n'est pas à la portée de tout le monde de faire le tour de la terre pour s'assurer qu'elle est ronde.

(2°) Le dogme de l'égalité est en rapport avec cette conception de Locke, développée par Condillac, par Helvétius, par Rousseau, d'après laquelle le cerveau de l'enfant nouveau-né peut être comparé à une table rase sur laquelle viennent s'enregistrer les actions du monde extérieur. Il est certain que, s'il en était ainsi, les inégalités intellectuelles seraient dues aux différences d'éducation et pourraient disparaître par l'établissement d'une éducation uniforme pour tous. Mais la biologie positive a démontré que, dès le jour de la naissance, les divers cerveaux

sont virtuellement inégaux, qu'ils appartiennent à des enfants de même sexe ou de sexe différent : en ce qui concerne les sexes, par exemple, bien que les femmes reçoivent, dans la généralité des cas, une éducation musicale plus soignée que celle des hommes, elles n'ont pas encore produit l'équivalent d'un Beethoven ou d'un Berlioz.

Selon la remarque de M. Laffitte, il ne pouvait pas y avoir, à l'origine de la civilisation, d'inégalités comparables à celle qui a existé entre Lagrange et n'importe quel paysan inculte de son temps, puisque aucun des hommes de l'âge de pierre ne savait compter au-delà de quelques unités.

(3°) Aucun souverain, pas plus populaire que royal, ne peut supprimer par décret les gelées tardives, les sécheresses, les maladies de la vigne ou de la pomme de terre, la concurrence étrangère, les conséquences de la guerre de 1870, etc... — D'autre part, à mesure qu'augmente le nombre des générations disparues, « les vivants sont de plus en plus gouvernés par les morts (A. C.) »

(4°) Comme l'a fait remarquer depuis longtemps Descartes, il est plus compréhensible qu'un seul homme ait raison dans les questions difficiles qu'une foule. Et l'infailibilité du pape qui est toujours au moins un homme intelligent, lorsqu'il n'est pas un homme supérieur comme dans le cas de Léon XIII, serait plus acceptable que l'infailibilité de la majorité des ignorants et des débiles qui composent le suffrage universel. En fait, le peuple a préféré Necker à Turgot, Danton à Robespierre, Napoléon I<sup>er</sup> à Hoche, Boulanger à Jules Ferry, etc..., a poussé Napoléon III à déclarer la guerre à l'Autriche pour assurer non seulement l'indépendance de l'Italie, mais aussi son *unité* ! a manifesté les plus vives sympathies pour l'Allemagne à l'époque de Sadowa, etc...

(5°) La croyance à la souveraineté du peuple et, par suite, à celle de ses délégués, est la source de cet état d'esprit si magistralement décrit par M. Waldeck-Rousseau, et qui se traduit par la formule : « l'Etat peut tout, le gouvernement ne fait rien ».

(6°) Ce n'est pas seulement en s'appuyant sur la considération de l'évolution des sociétés humaines que Comte a pu prétendre qu'à la spécialisation croissante des fonctions, qui est un caractère du progrès social, doit correspondre une augmentation croissante de la puissance du gouvernement ; c'est aussi en s'éclairant de la considération de l'évolution des espèces animales, chez lesquelles une différenciation croissante des organes est toujours en rapport avec une prépondérance croissante du système nerveux, qui représente l'appareil gouvernemental chargé d'assurer la réaction de l'ensemble sur les parties. Seulement, chez les populations occidentales, façonnées par le Catholicisme, l'organisation sociale a acquis cet avantage sur les organismes animaux que l'appareil de réaction de l'ensemble sur les parties se dédouble en un pouvoir temporel et en un pouvoir spirituel, l'un qui a pour sanction la force, l'autre qui, parlant au nom de convictions communes, s'appuie sur l'opinion publique et a pour sanction l'approbation ou le blâme. Il en résulte que, lorsque le gouvernement spirituel est puissant, il suffit à maintenir un concours qui, alors, se trouve être volontaire, et il n'y a pas nécessité de fortifier le gouvernement temporel. — Lorsqu'au contraire (comme c'est le cas en France où l'influence spirituelle restera émiettée entre une foule d'écoles divergentes, jua-

qu'au jour où le Positivisme prévaudra) il n'existe pas de pouvoir spirituel en état de rallier et régler les hommes, il est indispensable qu'il existe un gouvernement temporel assez fort pour assurer la réaction de l'ensemble sur les parties, en obligeant les individus à concourir, de gré ou de force, à l'entretien de la vie de l'Être collectif dont ils font partie. — Envisagées, au point de vue temporel, les conditions de l'indépendance individuelle et du concours sont entre elles dans un rapport qui varie, non seulement avec le degré de civilisation de chaque peuple, mais avec sa situation géographique, la configuration montagneuse ou plate de son sol, le degré de civilisation des peuples qui l'environnent, l'état de paix ou de guerre, etc. Il est évident, en effet, qu'une nation insulaire comme l'Angleterre, ou qu'un pays montagneux et neutralisé par l'Europe comme la Suisse, n'ont pas besoin de développer autant la centralisation politique et administrative que la France, placée au centre de la République occidentale, sans que la nature de son sol la protège contre les invasions des populations militaires qui l'entourent. Aussi, est-ce grâce à son admirable centralisation et à la formidable dictature organisée par la Convention que notre patrie a dû de n'être pas dépecée, à l'époque de la Révolution, et d'avoir pu poursuivre une évolution si avantagieuse pour l'Humanité entière. En temps de guerre, la considération du concours prime toutes les autres considérations; et toute trace d'indépendance individuelle disparaît dès que la nation est en danger.

(7°) La soumission est la base du perfectionnement, la condition de l'amélioration de notre nature et de notre situation. « Nous avons transformé le monde parce que nous nous sommes astreints à en connaître les lois; nous transformerons la société et l'homme, dès qu'au lieu de nous révolter contre l'ordre qui nous régit, nous nous appliquerons à l'étudier (P. Lafitte). »

(8°) « Leur caractère commun est de concevoir un idéal d'organisation sociale, sans se préoccuper de savoir si cette organisation est conforme à l'ordre naturel », c'est-à-dire à l'ordre structural transmis par l'évolution, « et, sans rechercher auparavant s'il est au pouvoir des hommes de le réaliser. Rien n'est facile comme de se créer un idéal, l'obtenir est moins aisé. C'est comme si on s'imaginait qu'il suffit de se construire un idéal de santé pour se bien porter. » (P. Lafitte).

(9°) L'amour de la propriété est une forme de l'instinct de conservation qui s'est différenciée au sein de la civilisation occidentale, dès les débuts mêmes de cette civilisation, chez nos ancêtres égyptiens. Et cet amour, consolidé par l'hérédité pendant la longue suite des siècles, est aujourd'hui définitivement fixé dans l'âme humaine, sous forme d'instinct, acquis par la race, mais spontané chez l'enfant. — En se combinant avec l'amour paternel, il a amené très rapidement l'institution de l'héritage qui, ainsi étayée sur deux des plus puissants instincts de la nature humaine, est aujourd'hui aussi indestructible que l'institution de la propriété elle-même, avec laquelle elle est d'ailleurs solidaire. — Celle-ci a pu, il est vrai, être supprimée au sein des ordres monastiques, mais seulement grâce à l'institution subjective de larges compensations, non plus collectives mais personnelles, dans le ciel; or, comme les socialistes n'ont pas de compensations dans le ciel à nous offrir (car ils n'ont même pas songé à lier la réforme pratique qu'ils



proposent à aucune réforme religieuse, intellectuelle et morale) on peut affirmer l'insuccès complet de leurs efforts. Du reste, l'expérience d'une société communiste, tentée par Cabet et ses compagnons en Nouvelle-Icarie, a démontré expérimentalement, d'une façon singulièrement saisissante, la force de l'instinct de la propriété, puisque, presque à l'insu d'eux-mêmes, la propriété individuelle s'était reconstituée dans cette association de purs communistes.

On sait que dans l'utopie collectiviste il subsiste un certain degré de propriété individuelle, représenté par les *bons de consommation* avec lesquels l'Etat paie ses ouvriers, ses savants, ses artistes, proportionnellement à la valeur de leurs travaux. Ces *bons de consommation*, qui ont une durée limitée, de façon à ne pouvoir se capitaliser ou être transmis par héritage, appartiennent cependant en propre à l'individu ; celui-ci n'a qu'à les présenter aux magasins de l'Etat, pour en retirer en denrées, en vêtements, en objets d'art, etc., selon son goût, l'équivalent de la valeur qu'ils représentent. Il peut, s'il lui plaît, les échanger contre les faveurs d'une courtisane. Il est donc bien propriétaire ; seulement, tout bon qui n'a pas été consommé dans un laps de temps donné perd sa valeur. Malgré cette atténuation au communisme primitif, le triomphe du socialisme serait un désastre pour la civilisation, car, du jour où l'homme ne pourrait plus capitaliser l'excédent de sa production sur sa consommation, et n'aurait plus l'espérance de pouvoir faire profiter ses enfants de cet excédent capitalisé, il s'arrangerait pour équilibrer sa production et sa consommation : ou bien, il réduirait celle-là au strict nécessaire, ou, si, par besoin d'activité, il continuait à produire beaucoup, il s'empresserait d'augmenter sa consommation pour ne pas laisser perdre la valeur des bons qu'il aurait entre les mains. Les résultats, au point de vue social, seraient la diminution de la production, l'augmentation de la consommation, c'est-à-dire la diminution et même la disparition de toute richesse sociale. — Il faut bien mal connaître la nature humaine pour espérer, comme certains collectivistes, que l'éducation pourrait rendre la majorité des hommes capables de travailler et d'épargner pour la collectivité, comme ils travaillent et épargnent actuellement pour accroître leurs richesses ou pour assurer un sort à leurs enfants.

(9<sup>e</sup> bis) « Le problème que notre siècle a reçu de ceux qui l'ont précédé est le problème de l'*incorporation du prolétariat à la société*. Par là, le Positivisme exprime que les temps sont passés où la masse humaine devait se résigner à n'être que l'humble substratum de classes privilégiées, auxquelles étaient réservées toutes les douceurs de la civilisation du jour. Les hommes dont le génie, l'activité et les sacrifices nous ont enrichis, améliorés, instruits, n'ont pas travaillé pour quelques-uns, mais pour tous. L'Humanité tout entière doit bénéficier de leurs efforts. — Mais, pour cela, il n'est pas nécessaire de briser tout l'ordre ancien et de méconnaître précisément ce qui a été la source de tant de progrès, Parce qu'il souffre des abus de la propriété, le prolétariat réclame aussitôt la suppression de cette propriété. Parce qu'il est dans l'obligation de résister aux exigences du patronat, il faut de suite qu'on le débarrasse du patronat ! Mais le prolétariat, sans y songer, s'élève là contre des conditions d'ordre, qu'il est impuissant à détruire et dont il ne peut que conjurer les effets nuisibles. La propriété qu'il maudit est mère de toutes les améliorations humaines, puisque sans elle et les

loisirs qu'elle a procurés à quelques centaines d'hommes, il n'y eût eu dans le monde, ni science, ni art, ni civilisation, ni moralité. Il eût fait beau voir, dans l'état collectiviste des rêves populaires, un Galilée ou un Turgot demander à l'assemblée du peuple de quoi lui prouver qu'elle avait tort quant au système du monde ou quant à l'idée de progrès ! Il n'est pas indispensable de supprimer la propriété pour en corriger les abus. Il n'est point davantage nécessaire de détruire toute hiérarchie dans le monde industriel, parce que les chefs actuels n'y seraient point toujours à la hauteur de leur tâche. Cette hiérarchie, sur laquelle l'industrie a fondé sa puissance, donnera un jour au prolétaire l'objet de ses aspirations : plus d'aisance avec moins de labeur, à la condition qu'il sache la conserver en l'améliorant. L'important n'est point que tout le monde soit à la fois directeur et dirigé, c'est que directeurs et dirigés se reconnaissent des devoirs, en raison de leur position. — Fatale est la propriété, fatale, pour peu qu'on y regarde, la division entre entrepreneurs et travailleurs ; fatales, par conséquent, les inégalités sociales. — Cessons donc de déclamer contre des autorités dont la nécessité s'impose, et qui, pour remplir des charges souvent difficiles, ont plutôt besoin d'être soutenues qu'affaiblies. Si notre intérêt comme notre devoir nous commandent d'empêcher qu'un office de protection ne dégénère en tyrannie, ils s'élèvent également contre tout contrôle qui tournerait à l'oppression » (Pierre Laffitte, *Revue occidentale*, de janvier 1881.)

(10°) Les collectivistes, en préconisant avant toutes choses l'entente internationale des travailleurs, reconnaissent eux-mêmes implicitement que la réforme des opinions et des mœurs doit précéder celles des institutions.

(11°) *Statuts du Cercle des prolétaires positivistes.* Pour être reçu membre du Cercle, il faut : 1° Reconnaître que la richesse est sociale dans sa source et doit l'être dans sa destination, tout en conservant une appropriation personnelle, condition indispensable de tout progrès ; par conséquent, considérer le détenteur des capitaux (terres, machines, etc.) comme un fonctionnaire social devant administrer au grand jour, pour le service de tous, une portion du capital de l'Humanité, sous sa responsabilité propre et la pression ou le contrôle de l'opinion publique régénérée ; — 2° considérer le salaire non pas comme destiné à payer ou comme pouvant payer intégralement la valeur du service rendu, valeur qu'il est impossible de déterminer exactement, mais simplement comme l'indemnité nécessaire, dans un milieu donné, à l'entretien du travailleur et à celui de sa famille.

(12°) « Tout vrai politique définitivement surgi doit être considéré comme une force sociale plus ou moins parfaite, mais qui doit être respectée, et dont la critique ne doit être menée qu'avec mesure et ménagement. Quand des hommes de valeur ont conquis par une ascension plus ou moins lente la notoriété, et qu'ils ont montré une aptitude plus ou moins grande aux affaires publiques, il n'est pas permis, moralement, de venir à tout propos et hors de propos les soumettre à des critiques sans discernement et sans réserve ». (Pierre Laffitte.)

---

## II. — CERCLE DES PROLÉTAIRES POSITIVISTES DE PARIS

### LE CONGRÈS SOCIALISTE INTERNATIONAL DE LONDRES.

#### A. — Compte rendu par M. FAGNOT, typographe.

MESSIEURS,

Votre délégué au Congrès socialiste international qui s'est tenu à Londres, du 26 juillet au 2 août 1896, je viens vous rendre compte de cette mission et tenter de dégager l'enseignement de cette manifestation occidentale qui, pour avoir été bruyante et quelque peu désordonnée, ne m'en paraît pas moins d'une réelle importance.

Je dois de suite vous avouer que mon rôle au Congrès a été, à peu de chose près, limité à celui d'un simple spectateur. Partageant en cela le sort des trois quarts des délégués, je n'ai pu intervenir à aucun moment pour exprimer l'opinion positiviste sur un point quelconque de l'ordre du jour. Quant à la note que j'avais préparée, avec votre approbation, sur la question des *Rapports entre le capital et le travail*, il ne me fut pas même possible d'en donner communication à la commission chargée de traiter les questions économiques.

#### I

Donnons d'abord un coup d'œil rapide sur la composition du Congrès. Il comprenait 765 délégués venus de divers points d'Europe, la Russie y compris, et d'Amérique. L'élément purement ouvrier, c'est-à-dire syndical, y était en minorité évidente. Ce fut un Congrès politique.

L'Angleterre était représentée par 475 délégués, soit 60 p. 100 du chiffre total. Ils se décomposaient comme suit : 185 délégués des Trade Unions ; 120 de la « Social democratic Federation », parti socialiste incomplètement rallié au collectivisme marxiste ; 115 du « Independent Labour party », parti socialiste qui présente beaucoup d'analogie avec notre parti possibiliste ou allemaniste ; 20 de la « Fabian Society », parti politique bourgeois, d'opinion radicale-socialiste, qui exerce une grande influence à Londres, où il

possède la majorité au conseil de comté; quelques délégués de groupes divers. Parmi les puissantes fédérations de travailleurs anglais, quelques-unes seulement étaient représentées.

La France avait envoyé 123 délégués, représentant les diverses opinions politiques et sociales du prolétariat industriel. Les divers partis socialistes étaient représentés par leurs principaux « leaders »; vous savez déjà ce qu'il en coûta de temps au Congrès pour s'être offert le dessus du panier de nos orateurs socialistes. Quant à l'élément syndical véritable, il comptait, en faisant bonne mesure, une trentaine de délégués; parmi ceux-ci, notre sympathique président, M. Keufer, tenait le premier rang, ce qui lui a attiré les attaques aussi injustifiées que violentes des politiciens marxistes.

L'Allemagne comptait d'abord 51 délégués; mais, après avoir été soumise au crible étroit du marxisme orthodoxe, la délégation fut réduite à 45 membres. Par l'unanimité persévérante avec laquelle ils votaient, sur un simple signe de leurs chefs, les tout puissants Liebknecht, Bebel et Singer, les 45 délégués allemands nous ont donné une haute idée de leur forte discipline, que les méchantes langues appelaient le fruit du caporalisme prussien.

Les autres nationalités, au nombre de 18, avaient envoyé chacune une dizaine de délégués en moyenne; plusieurs nations cependant n'étaient représentées que par 3, 2 et même un seul délégué.

Il faut vous dire que le nombre des nationalités européennes était, au Congrès de Londres, sensiblement supérieur à celui que nos maîtres d'école — qui sans doute ne connaissaient point la géographie marxiste, — nous ont jadis indiqué. C'est ainsi que la malheureuse Pologne nous est apparue, plus vivante que jamais, dans la personne de plusieurs délégués qui, à ce qu'on assure, étaient des Polonais de Berlin, de Paris, bien plus que de Varsovie. Nous avons aussi appris à connaître, comme nation distincte, la Hongrie, la Bohême, etc. Cela vous indique, sous le masque d'une protestation contre les tyrans, une petite ficelle habilement employée par les organisateurs marxistes du Congrès pour s'assurer la majorité — ce qui leur a d'ailleurs parfaitement réussi. En effet, lorsqu'une proposition n'avait point l'heur de plaire aux grands directeurs spirituels de l'assemblée, ou bien, inversement, lorsqu'une proposition de source pure (lisez marxiste) produisait sur le Congrès l'effet d'une pilule amère, aussitôt, par une preste manœuvre du bureau, — toujours bien composé — il était procédé au vote par *nationalité*; et il va de soi que le vote

avait lieu sans jamais permettre à personne, parmi les adversaires, de prendre la parole sur le subterfuge ou sur la question elle-même. On avait alors ce réjouissant spectacle : le D<sup>r</sup> Aveling — qui devait sans doute à son titre d'époux de mademoiselle Karl Marx la faveur de représenter l'Australie à lui seul, et tout en habitant Londres — le D<sup>r</sup> Aveling faisant échec au vote de la France (123 délégués), ou même de l'Angleterre (475 délégués).

## II

Pénétrons maintenant au sein de la section française; je crois, d'ailleurs, qu'il me suffira de résumer brièvement les nombreux incidents qui s'y sont produits, la presse quotidienne vous en ayant instruits au jour le jour.

Vous connaissez le motif de la scission qui partagea la délégation en deux groupes, la France et la Navarre, comme disaient les délégués d'autres pays. Suivant le mot d'ordre reçu, les chefs du parti marxiste, appelé guesdiste chez nous, ayant reconnu quelques anarchistes, — ils étaient exactement 12 —, résolurent d'obtenir leur expulsion. Par l'organe du nouveau député de Paris, M. Gabriel Deville, les guesdistes proposèrent que, pour être admis au Congrès, chaque délégué fût tenu de déclarer qu'il considérait la conquête du pouvoir politique comme le premier et le meilleur moyen de transformer l'ordre social. Cette proposition enfermait évidemment la délégation dans un *credo* étroit; aussi fut-elle le signal d'une tempête qui ne dura pas moins de trois jours et qui, par répercussion, suspendit les travaux du Congrès pendant le même laps de temps. Après de nombreux discours, dont l'un de M. Jules Guesde, qui envenima encore le débat, on passa au vote. Par 57 voix contre 56, la proposition intransigeante des guesdistes fut repoussée et, conséquemment, tous les délégués, régulièrement mandatés, admis sans faire au préalable une confession sur leurs opinions quelconques. Il faut dire, au surplus, que les anarchistes visés ne représentaient point des groupements anarchistes, mais bien la plupart des chambres syndicales ouvrières. La faible majorité fut obtenue après l'intervention de trois orateurs, professant des opinions très opposées, MM. Allemane, Keufer et Tortelier; ces délégués firent observer, chacun avec son tempérament et ses tendances, qu'aucune école ne pouvant prétendre à la science infuse, le Congrès devait accepter toutes les opinions et les laisser se manifester librement.

Devant le résultat du vote, la minorité se retira solennellement et ne voulut plus avoir aucun rapport avec la majorité. Elle constitua une seconde délégation française, la  *vraie* , après en avoir obtenu, non sans peine cependant, l'autorisation du Congrès. Au fond, cette scission fut ridicule et surtout maladroite, car ce vote fameux n'avait d'autre importance que celle qui lui fut prêtée par les guesdistes. Après cet incident, je me prends à douter fort des grandes qualités de tacticien parlementaire généreusement accordées à certain député socialiste.

En séance du Congrès, les diverses nations adoptèrent, par 16 voix contre 2 (la France et la Hollande), la disposition du règlement de Zurich, d'après laquelle les travailleurs doivent considérer la conquête des pouvoirs politiques comme le premier but à atteindre par le parti socialiste.

### III

Par suite des divisions entre délégués français, et des efforts faits par les marxistes pour obtenir l'expulsion des anarchistes ou, pour parler plus exactement, de tous les délégués qui ne pensaient pas comme eux, le Congrès, nous l'avons dit, ne mit pas moins de trois jours à se constituer définitivement. Il va sans dire que les deux jours et demi qui restaient disponibles n'étaient pas suffisants pour discuter, en trois langues, un ordre du jour des plus chargés. Aussi toute discussion fut-elle pour ainsi dire supprimée ; les rapports des commissions ont été tous adoptés, sans modifications importantes.

Formées de deux délégués élus par chaque nationalité, les commissions reflétaient fidèlement l'opinion de la majorité de chaque délégation — la France exceptée ; c'est vous dire que toutes les résolutions soumises au vote du Congrès sont imprégnées de collectivisme marxiste.

Pour connaître l'opinion du Congrès, prenons, à titre d'exemple et comme nous intéressant davantage, le rapport de la commission d'éducation et de développement physique. Cette commission était présidée par M. Sydney Webb, délégué de la « Fabian Society » de Londres. Voici ses principales propositions, adoptées par le Congrès, l'article 2 excepté :

Dans le système actuel d'exploitation capitaliste, les enfants des masses sont arrêtés dans leur croissance physique, dépourvus de tout loisir sain, conditions expresses d'un développement harmonieux. Ils

sont aussi privés de toute accession à l'éducation et aux connaissances scientifiques, héritage commun de toute la race humaine.

1. Le Congrès, tout en reconnaissant pleinement la valeur de l'expérimentation individuelle en matière d'éducation, déclare qu'il est du devoir primordial des pouvoirs publics de chaque pays d'établir un *système complet d'éducation*, sous le contrôle démocratique public, système allant depuis les jardins d'enfants jusqu'à l'Université et comprenant un enseignement physique, scientifique, artistique et technique (travaux manuels); le tout sera accessible à chaque citoyen par la gratuité absolue et par des bourses d'entretien.

2. L'organisation scolaire comprendra un repas en commun par jour, ainsi que cela se fait dans les cantines scolaires, sans distinction individuelle entre riches et pauvres; des mesures précises seront prises pour l'entretien intégral et l'éducation, selon les meilleures méthodes, de tous les orphelins et de tous les enfants abandonnés.

3. L'âge minimum, auquel les enfants seront exemptés de toute présence à l'école et légalement autorisés à être employés dans les fabriques de la petite industrie, comme aussi dans l'industrie domestique, sera porté, graduellement, aussi vite que possible et dans tous les pays, à 16 ans accomplis.

4. L'emploi de tout enfant au-dessous de 18 ans sera absolument et légalement interdit dans toute profession malsaine ou dangereuse.

5. Dans le but de continuer l'éducation de l'enfant et pour restreindre l'usage illégitime par les capitalistes du travail de l'enfant, il ne sera permis à aucun employeur de se servir d'un garçon ou d'une jeune fille de moins de 18 ans, ni dans les manufactures, ni dans l'industrie domestique, pendant plus de 24 heures par semaine (système du demi-temps).

L'enseignement complémentaire sera obligatoire.

6. En ce qui concerne les enfants, en tous cas, la législation industrielle de tous les pays devrait être fixée uniformément par voie d'entente internationale.

Pour la protection et l'éducation des enfants dans les centres industriels, il est absolument nécessaire que le travail industriel fait à la maison soit inspecté effectivement et réglé autant que le travail fait dans les manufactures.

Vous êtes frappés, messieurs, par l'insuffisance et les lacunes de ce « système complet d'éducation » qui, tout au plus, doit être considéré comme un système incomplet d'instruction. C'est en vain que l'on y chercherait des indications sur les procédés de culture morale de la jeunesse. Préoccupé davantage du côté utilitaire que du point de vue social, le rapport ne dit pas un mot sur la nécessité de développer les sentiments altruistes, afin d'atténuer les heurts et les conflits qu'engendre la vie collective. Quant à cette vague aspiration vers un régime phalanstérien, elle nous paraît radicalement contraire aux conditions normales du développement physique et intellectuel des écoliers. En un mot, malgré quelques mérites secondaires, le plan d'enseignement indiqué par

le rapport est profondément inférieur à l'admirable système d'éducation générale et d'instruction encyclopédique tracé par Auguste Comte pour les enfants des deux sexes de toutes les classes sociales.

#### IV

Comme il me paraît sans intérêt de vous soumettre les diverses résolutions adoptées par le Congrès de Londres sur les sujets les plus divers, je voudrais simplement examiner, à propos du rapport de la commission des questions économiques, l'ingénieuse tactique du parti marxiste.

Vous savez déjà que la direction générale du Congrès appartient exclusivement aux membres principaux du parti collectiviste marxiste, et vous venez de voir que toutes les résolutions votées furent inspirées par les doctrines et la tactique de ce parti. Ne nous laissant pas envahir par l'esprit de secte, et n'ayant d'ailleurs à redouter aucune concurrence, nous n'éprouvons nulle gêne à reconnaître la force et l'influence acquises par le parti marxiste. Des divers partis socialistes qui se disputent le prolétariat industriel, le parti marxiste est, à beaucoup près, le plus fort, le plus discipliné, le mieux organisé. Il possède une doctrine, un programme défini, et il dispose d'hommes de valeur pour propager l'une et défendre l'autre. Il sait ce qu'il veut, le but qu'il doit atteindre et quels sont les meilleurs moyens d'y parvenir. Sa tactique, qu'il affirme maintenant à la face de ses adversaires, consiste à conquérir le pouvoir politique, en faisant pénétrer dans les assemblées parlementaires, par l'élection, des hommes choisis et préparés à l'avance. Pour capter les électeurs, il utilise, avec habileté, les revendications confuses des prolétaires, comme il sait se constituer le défenseur zélé, sinon désintéressé, de leurs intérêts menacés.

Vous en jugerez par la savante combinaison qu'il vient d'introduire entre l'action politique et l'action économique ou syndicale. Cette combinaison se trouve dans le rapport de la commission économique du Congrès de Londres, rapport qui, tout en repoussant, avec quelque dédain, la fameuse grève générale, n'en fut pas moins adopté à une grande majorité. En voici les passages essentiels :

La lutte économique et syndicale des ouvriers est indispensable pour combattre la toute-puissance du capital et pour améliorer la situation des ouvriers dans la société actuelle. Pas de syndicats ouvriers, pas de salaires suffisants, pas de réduction des heures de travail. Mais cette



lutte économique ne peut pas supprimer l'exploitation capitaliste, elle ne fait que l'adoucir. L'exploitation des ouvriers ne prendra fin que lorsque la société elle-même aura pris possession de tous les moyens de production, y compris le sol et les moyens de transport. Cette socialisation des moyens de production exige, comme condition *sine qua non*, tout un système de mesures législatives. Ces mesures ne seront réalisées que si la classe ouvrière possède le pouvoir politique. Mais ce pouvoir politique ne peut être conquis qu'au fur et à mesure que la classe ouvrière sera organisée. Les syndicats constituent la classe ouvrière en puissance politique en organisant les ouvriers. L'organisation de la classe ouvrière est incomplète et insuffisante, tant qu'elle n'est organisée que politiquement.

Mais la lutte syndicale des ouvriers exige aussi l'action politique de la classe ouvrière. Ce que les ouvriers ont conquis par la lutte syndicale contre leurs exploiteurs, ils doivent toujours l'assurer par des mesures législatives pour le maintenir définitivement. Dans d'autres cas les réformes législatives conquises évitent des conflits économiques.

Tel est, messieurs, le véritable dilemme dans lequel le parti marxiste enferme le mouvement social du prolétariat.

Pour bien démontrer que la théorie ci-dessus est rationnelle, que l'action économique est insuffisante si elle n'est complétée par l'action politique, le rapport indique ensuite les revendications suivantes, communes aux diverses écoles collectivistes et qui, en effet, ne peuvent être réalisées, sous cette forme, que par le pouvoir politique :

- 1° Fixation légale de la journée de travail à huit heures ;
- 2° Suppression du *sweating system* ou marchandage ; création d'une législation efficacement protectrice en faveur des ouvriers et ouvrières de l'industrie ;
- 3° Droit de coalition, d'association et de réunion absolument libre pour les deux sexes.

## V

Cette liaison étroite des deux aspects économique et politique d'un même problème est d'autant plus ingénieuse qu'elle n'est pas, pour nous, entièrement arbitraire. Aussi est-il facile de s'expliquer pourquoi les prolétaires, injustement frappés par les conséquences immédiates du machinisme et les caprices du consommateur, seront entraînés à adopter le programme du parti marxiste, dont je viens de vous donner un aperçu. En réalité, il ne peut guère y avoir, dans la situation actuelle, que les prolétaires ralliés aux solides doctrines sociales du positivisme qui puissent échapper aux séduisantes tentations du socialisme d'Etat. Il faut être positiviste pour se convaincre que les profondes modifications qui doivent

s'opérer dans l'ordre social ne peuvent être réalisées que graduellement; qu'elles exigent une régénération préalable des opinions et des mœurs, sous l'action d'une doctrine générale librement acceptée de tous; qu'une fois ce premier travail accompli, l'ordre social se modifiera spontanément sous la pression irrésistible d'une opinion publique organisée et dirigée par ses chefs spirituels.

Toutefois, il n'est pas douteux que, pendant la longue transition qui nous sépare de cet état normal, des procédés empiriques devront être employés pour remédier aux plus criantes imperfections sociales. Si les doctrines peuvent attendre presque indéfiniment l'heure de leur application, les besoins immédiats de l'Humanité ne sauraient accorder un tel crédit, car, avant tout, la société doit vivre et se perpétuer; d'autre part, les nouveaux besoins sociaux se font fatalement sentir longtemps avant le moment où les moyens réels de les satisfaire sont adoptés par l'ensemble du corps social.

Donc, pendant la transition, c'est-à-dire à notre époque, des moyens empiriques pourront être employés. A défaut de pouvoir spirituel, le pouvoir temporel, c'est-à-dire le gouvernement, devra, à l'aide de la loi, intervenir dans les questions économiques. Le gouvernement peut intervenir — et les gouvernements de plusieurs nations d'Europe sont dans cette voie — pour protéger l'enfant, la femme et le vieillard contre les abus inhérents à l'industrie, comme à toute entreprise humaine. Il peut édicter des mesures d'hygiène, et peut-être même d'assistance. En cas de chômage étendu et prolongé, il peut intervenir pour aider, par des travaux spéciaux, à traverser une crise passagère. Il peut sanctionner les conventions établies, pour un temps, entre les représentants naturels des patrons et des ouvriers. Il doit aussi, et strictement, donner l'exemple d'un bon patron toutes les fois qu'il emploie, directement ou indirectement, des travailleurs. Mais l'intervention de l'Etat doit être, en chaque cas, prudente et mesurée. Si, cédant aux sollicitations pressantes des partis socialistes, il réglementait par la loi les conditions mêmes du contrat de travail, deux phénomènes également funestes ne tarderaient pas, suivant nous, à se manifester : ou bien, en voulant améliorer les conditions du travail dans l'industrie, il détruirait l'industrie elle-même, ou bien ses décisions resteraient lettre morte, ce qui paraît même plus probable. Dans les deux cas, son action serait également mauvaise et il apprendrait ainsi que les lois sont impuissantes à agir contre les fatalités naturelles, c'est-à-dire, en l'espèce, contre les opinions et les mœurs régnantes.

Pour exprimer notre opinion sur ce point important, nous avons dû faire une digression. Revenons maintenant à l'étude du parti collectiviste marxiste.

Nous avons donné les raisons pour lesquelles ce parti devait obtenir, dans le prolétariat industriel, des sympathies de plus en plus nombreuses. Mais, pourra-t-on objecter, si le parti marxiste a des chances de conquérir les ouvriers de l'industrie, il lui sera impossible d'entamer le prolétariat agricole, si profondément attaché, du moins en France, à la propriété de son lopin de terre. Là encore, messieurs, il ne faudrait pas se porter garant de l'avenir. En effet, le parti marxiste, sentant bien la nécessité de gagner le cultivateur, a pris pour y parvenir les moyens les plus efficaces. Il n'a même pas hésité à faire, de ses propres mains, un véritable accroc à sa doctrine sur la propriété individuelle. On le traite déjà, pour un tel forfait, de traître, de renégat, d'opportuniste — ce qui, vous le savez, est la dernière injure pour un socialiste ; mais tous ces mots ne l'émeuvent point : il a un but, il veut l'atteindre.

Le congrès de Londres a décidé — ce que n'avait pas osé faire le congrès de Breslau, en 1895 — qu'au point de vue agraire, chaque parti socialiste national suivra la tactique la plus propre à lui assurer les suffrages des paysans. Ce qui veut dire, pour la France, que les candidats marxistes déclareront aux électeurs agricoles — en y mettant une sourdine — qu'ils ne veulent point supprimer la petite propriété terrienne, mais bien au contraire qu'ils sont résolus à l'agrandir et à la consolider en faisant opérer le partage des grandes propriétés foncières, au profit des simples cultivateurs. Or, vous savez, messieurs, combien cet appât de la propriété, même présenté sous la forme de vente des biens nationaux, contribua à rendre le paysan favorable à l'œuvre nécessaire de la Révolution !

Oh ! nous sommes bien convaincu que le parti marxiste ne peut réaliser ses desseins ; qu'au moment même où il croira gagner la victoire définitive, tout s'effondrera sous lui, dans une formidable et désastreuse réaction. De telle sorte que le parti marxiste, pas plus que tout autre parti politique d'ailleurs, ne parviendra pas à instaurer le régime qui doit établir l'harmonie finale et empêcher notre système social d'osciller, suivant le mot d'Auguste Comte, entre la rétrogradation et l'anarchie.

Mais cela ne saurait nous empêcher de constater que le parti marxiste est sérieusement organisé et qu'il réunit les meilleures conditions pour gagner peu à peu le suffrage universel. Nous de-

vons même reconnaître qu'il est, dans l'esprit du prolétariat, le véritable organe des aspirations sociales de notre temps.

## VI

Pour achever cette appréciation, examinons maintenant le degré de pénétration du collectivisme marxiste dans les trois nations placées à la tête de l'Occident : l'Allemagne, l'Angleterre et la France. Nous rechercherons en même temps quel est, de ces trois pays, celui où il pourrait plus tôt posséder le pouvoir politique. Nous indiquerons enfin pour quels motifs il nous paraît devoir finalement échouer.

En Allemagne, où les mœurs semblent particulièrement favorables à une doctrine qui considère l'homme comme un automate, le marxisme possède ses représentants les plus renommés, et des hommes activement dévoués. Il n'est pas douteux, cependant, qu'il ne peut espérer de longtemps triompher dans ce pays, pour nombre de raisons qu'il est inutile de développer ici.

L'Angleterre, malgré le régime parlementaire et la somme de libertés dont jouit ce grand pays, lui paraît également inaccessible avant une époque des plus reculées. Le peuple anglais est trop attaché à ses doctrines religieuses et à ses intérêts individuels; il manque trop d'instinct révolutionnaire pour s'appréhender sérieusement d'une doctrine qui détruirait des mœurs et un état social encore si fortement enracinés. La liberté dont jouit l'Angleterre est peut-être bien, d'ailleurs, la meilleure soupape de sûreté contre toute fermentation profonde du marxisme dans la population britannique.

Reste la France, notre chère patrie. Pour ne pas faillir à sa glorieuse et périlleuse mission de pionnier d'avant-garde de la civilisation, la France présente, en effet, les conditions les plus favorables à toute tentative quelconque de réorganisation sociale, quelque douloureuse que puisse être, pour notre pays, une semblable expérimentation.

Des trois grandes nations occidentales, c'est évidemment en France où les principes et institutions sociales qui ont dirigé jusqu'ici sont le plus profondément vermoulus.

La religion n'est plus, depuis le grand XVIII<sup>e</sup> siècle, qu'un objet inutile pour les esprits actifs; elle a perdu toute influence effective sur la vie sociale — ce qui est la caractéristique de sa décrépitude. Elle est à ce point délabrée que ceux-là mêmes qui cherchent à maintenir son action morale ne croient plus guère à ses

dogmes fondamentaux. Le catholicisme n'est plus qu'un très respectable débris d'un système social épuisé, duquel des âmes simples, surtout féminines, peuvent encore obtenir quelques services strictement personnels.

Le régime politique de la France, quoique mieux adapté à la situation actuelle, comporte cependant de graves défauts.

Mauvaise copie du système parlementaire qui régit l'Angleterre, le Parlement français, qui dispose à son gré du pouvoir exécutif, ne cesse au fond de saper tout gouvernement, dans un pays où l'autorité centrale est indispensable. A ce point que, dans notre régime, les hommes d'Etat ne peuvent sinon surgir, du moins conserver le pouvoir pendant le temps nécessaire à la réalisation d'un plan d'ensemble, mûrement étudié. L'influence de principes démocratiques outrés — qu'il ne faut pas confondre avec les vrais principes républicains — ne permet d'ailleurs pas, à l'heure actuelle, l'établissement du régime républicain réellement conforme aux nécessités de tout gouvernement, en France. Parmi ces principes démocratiques, le plus dangereux est celui qui proclame la prétendue souveraineté du peuple. Son action dissolvante vicie profondément l'exercice régulier du suffrage universel ; ce qui est d'autant plus regrettable que le suffrage populaire est le seul procédé par lequel le pouvoir politique puisse surgir, depuis que, grâce à nos pères de 1793, la royauté a disparu.

En résumé, par l'esprit absolu dans lequel le régime parlementaire est appliqué chez nous, le pouvoir législatif s'efforce de combattre et d'annihiler l'action nécessaire du pouvoir exécutif. De ce contre-sens il résulte que le système politique est, au fond, plus favorable aux adversaires socialistes du régime républicain qu'à ses propres partisans.

Notre système économique, profondément anarchique, où la raison du plus fort est toujours la meilleure, suivant le mot de La-fontaine, qui s'y applique presque exactement, facilite au plus haut point l'action critique des partis socialistes, du marxisme en particulier. Par cette critique, d'ailleurs facile, d'imperfections sociales réelles, le marxisme obtient aisément l'adhésion des prolétaires pour son socialisme d'Etat ; car ce système semble, en effet, les garantir contre leurs besoins immédiats et leur assurer en même temps la réalisation complète de toutes leurs généreuses aspirations sociales.

## VII

Ces considérations générales sur les trois aspects principaux de

notre société accusent une décomposition avancée du corps social. Cette décomposition est d'ailleurs fatalement inhérente à toute époque de transition. Mais une société ne peut vivre indéfiniment dans de telles conditions. Elle doit, pour continuer sa marche vers un avenir meilleur, subir une régénération totale. C'est là que les théories sociales surgissent et se disputent les esprits et les cœurs.

Des diverses théories existantes, le collectivisme marxiste est celle qui, à l'heure actuelle, occupe la plus grande place dans l'esprit du prolétariat occidental. Voyons donc si cette doctrine réunit toutes les conditions nécessaires à son avènement prochain en France, puisque c'est dans notre pays que doit se faire toute expérience sérieuse de réorganisation sociale.

Le marxisme compte déjà de réelles forces dans notre pays ; il a pénétré dans tous les corps élus, conseils municipaux, conseils généraux, Parlement ; il préside même à l'administration de villes entières, telles que Montluçon, Roubaix, Marseille, Lille, etc. De plus, tout fait prévoir que ses succès électoraux ne s'arrêteront pas là et qu'à l'aide du suffrage universel, qu'il sait si bien amener à lui, ses forces et son influence grandiront encore.

Mais peut-il parvenir, dans un temps plus ou moins rapproché, au triomphe final ?

A cette grosse question nous n'hésitons pas à répondre négativement. En voici les raisons, brièvement résumées.

En premier lieu, le prolétariat agricole lui opposera, pendant longtemps encore, une force d'inertie contre laquelle ses efforts demeureront à peu près stériles. De plus, même en faisant abstraction de cette moitié de la population française, nous ne croyons pas qu'il puisse conquérir entièrement le prolétariat industriel. Examinons de près l'état général des esprits parmi les prolétaires militants, c'est-à-dire parmi ceux qui donnent l'impulsion et entraînent la masse sociale. Aussi bien cet examen est-il rendu facile par les incidents du Congrès de Londres qui, en accentuant les divisions existantes, ont démarqué assez rigoureusement les tendances et les tactiques opposées.

Il y a d'abord le vieil esprit révolutionnaire français, fait d'indépendance et d'impétuosité, qui se cabre, comme un alezan fougueux, devant le marxisme qui voudrait le discipliner afin de l'embrigader. Ce vieil esprit, qui puise dans ses traditions et dans nos propres mœurs ses qualités et ses défauts, est l'inspirateur des partis blanquiste et possibiliste ou allemaniste. Vous savez que, sans être prépondérants à Paris, ces deux partis y possèdent la

plus grande partie de leurs forces. Le marxisme, au contraire, ne compte à Paris que quelques chefs, un certain nombre d'adeptes, mais aucun groupement effectif. Et pour un parti qui vise à transformer l'ordre social en France, ne pas avoir Paris dans son jeu, n'est-ce pas manquer du plus précieux atout ?

D'autre part, à mesure que le mouvement syndical se développera parmi les prolétaires, ils délaisseront de plus en plus les préoccupations de politique pure pour se consacrer spécialement à la défense de leurs intérêts professionnels. Il en résultera une perte sèche pour le marxisme. Vous avez vu, par le rapport de la commission des questions économiques du Congrès de Londres, combien le marxisme redoute ce danger. Il fait tous ses efforts pour forcer l'adhésion des syndicats, car il sait bien que, pour constituer une force politique considérable, son parti doit s'appuyer sur le mouvement syndical, seule base naturelle et solide. Mais déjà les syndicats ont aperçu l'écueil et veulent y échapper. Il en est même quelques-uns, la fédération typographique notamment, qui ont su traverser ce passage, si dangereux pour eux.

Enfin, le milieu révolutionnaire lui-même a produit contre les socialistes d'Etat un parti qui se dresse violemment devant eux, au nom de l'indépendance et des droits de l'individu. Les libertaires, — je n'apprécie pas, je constate simplement — ne sont pas très nombreux ; ils exercent néanmoins une réelle action sur notre société troublée. A preuve, les dommages qu'ils ont déjà fait subir à la grande notion de Patrie. Envers les marxistes, l'opposition des libertaires est irréductible. Ce sont, d'ailleurs, des frères ennemis depuis leur naissance, et vous savez, par le Congrès de Londres, que leurs rapports ne sont pas précisément courtois.

Ces divers partis, de nature si dissemblable, s'unissent spontanément — ainsi que cela s'est produit à Londres — pour faire opposition à l'invasion du marxisme. Recrutant leurs adeptes dans le prolétariat industriel, on peut en conclure qu'ils opposeront finalement au parti marxiste une barrière infranchissable.

En résumé, Messieurs, le milieu social français, le plus favorable pourtant, produit spontanément des obstacles que le marxisme ne parviendra pas à surmonter. Pour nous, la raison même de cette impuissance finale tient surtout à l'insuffisance de la doctrine marxiste, qui ne donne pas la solution réelle des problèmes sociaux qu'elle pose, et qu'elle maintient devant l'opinion publique.

Telles sont, Messieurs, les réflexions que m'a suggérées le Con-

grès international de Londres. Si ces réflexions obtiennent votre approbation, elles peuvent comporter pour nous, prolétaires positivistes, un précieux encouragement. La théorie qui jouit de la plus grande faveur auprès du prolétariat occidental décèle déjà son impuissance à résoudre les grands problèmes sociaux de notre temps. Il nous est donc permis de croire, avec plus de conviction que jamais, que le Positivisme porte en lui la véritable solution qui consiste à assurer, par la persuasion beaucoup plus que par la force, le triomphe des bons sur les mauvais penchants, de la sociabilité sur la personnalité, de l'altruisme sur l'égoïsme; de manière à « substituer la paisible détermination des devoirs à l'orageuse discussion des droits » (1).

Convaincus du succès final, quelque éloigné qu'il soit de nous, c'est à faire connaître les solutions sociales du Positivisme que nous devons consacrer nos plus vigilants efforts, dans l'intérêt supérieur du prolétariat.

En terminant ce compte rendu, je dois vous faire part de l'accueil cordial que nous avons reçu, M. Keufer et moi, de nos confrères de la Société positiviste de Newton-Hall, à Londres, et particulièrement de M. et de M<sup>me</sup> Harrison. Nous avons eu la bonne fortune d'assister, à Newton-Hall, à la simple et touchante cérémonie du mariage positiviste de M. Henry Tompkins, ouvrier typographe, avec M<sup>lle</sup> Challis. Cette cérémonie, qui atteste la vitalité du Positivisme en Angleterre, a produit sur nous une vive impression dont nous conserverons longtemps le délicieux souvenir.

M. Henry Crompton, de la Société positiviste de Chapel Street, à Londres, a eu également pour nous les plus délicates attentions.

## B. — Les Conflits entre le Capital et le Travail

### CITOYENS,

Le Cercle des prolétaires positivistes de Paris, qui m'a délégué dans ces assises des travailleurs du monde entier, désire vous présenter quelques considérations sommaires et indiquer quelle est, à son avis, la meilleure voie à suivre pour régler les conflits sans cesse renaissants entre le capital et le travail.

Sans entrer dans aucuns développements historiques, cependant très nécessaires pour appuyer notre opinion — mais que les dix minutes accordées me forcent à négliger — je constaterai

(1) Auguste Comte, *Système de politique positive*, t. I<sup>er</sup>, page 151.



simplement que l'organisation sociale actuelle, quelque défectueuse qu'elle soit, est le résultat de l'évolution qui, pendant les cinq derniers siècles, a peu à peu émancipé les travailleurs du servage. De plus, cette organisation est caractérisée, spécialement depuis la Révolution française et l'avènement de la grande industrie, par la division spontanée des producteurs en entrepreneurs qui dirigent et en travailleurs qui exécutent, soit entre patrons et ouvriers. Ce grand phénomène, je dois le reconnaître, est bien plutôt subi qu'accepté par les militants du prolétariat. Quant aux prolétaires positivistes, s'ils acceptent volontairement cette division comme un phénomène naturel contre lequel toute révolte leur semble vaine et stérile, ce n'est qu'à la condition de ne jamais perdre de vue ce théorème sociologique : « La richesse, étant sociale dans sa source, doit l'être dans sa destination, tout en conservant une appropriation personnelle » (1), base et garantie de toute initiative et de tout progrès, comme de toute responsabilité. Et le caractère personnel de cette appropriation ne doit en aucune façon être confondu avec celui que proclament les économistes, ainsi qu'en témoignent formellement les paroles suivantes d'Auguste Comte : « Les vrais philosophes n'hésitent point à sanctionner directement les réclamations instinctives des prolétaires envers la vicieuse définition adoptée par la plupart des juristes modernes qui attribuent à la propriété une individualité absolue, comme droit d'user et d'abuser. Cette théorie anti-sociale est autant dépourvue de justice que de réalité » (2).

Sans vouloir soulever une controverse sur cette irritante question, j'ai cru devoir vous faire cette déclaration précise parce qu'elle me paraît offrir le véritable terrain sur lequel doit reposer l'examen de la grosse question des conflits entre le capital et le travail. Envers cette question, en effet, il ne s'agit pas de substituer théoriquement tel système à tel autre, mais bien de raisonner d'après le système qui est, — lequel, à tout le moins, persistera pendant longtemps encore — afin d'en tirer la meilleure condition possible pour le travailleur. Cette manière de voir et d'agir ne peut d'ailleurs nullement empêcher chacun de poursuivre l'avènement du système et de l'idéal de son choix. Aussi bien est-il évident que l'amélioration croissante du système en vigueur est encore le plus sûr moyen de préparer l'avènement du régime social de demain. D'autre part, les malheureux, accablés

(1) Auguste Comte, *Politique positive*.

(2) Auguste Comte, *Système de Politique positive*, t. 1<sup>er</sup>, p. 154.

autre mesure par les préoccupations de la vie matérielle, peuvent parfois fournir des révoltés, jamais des réformateurs. L'expérience l'a plus d'une fois démontré.

\*  
\*  
\*

Ceci établi, examinons l'influence directe des conflits industriels sur l'organisation économique et sociale.

Etant données les conditions actuelles de cette organisation, nous n'hésitons pas à déclarer que le refus de concours, ou la grève, nous paraît être, pour l'ouvrier, le moyen extrême auquel il doit recourir pour chercher à améliorer quelque peu une situation trop souvent précaire. Tant que les notions de morale sociale n'auront pas, chez les industriels, remplacé la méprisable morale de l'intérêt, les grèves sont inévitables et, dans la plupart des cas, parfaitement légitimes.

Je n'ai pas besoin de vous démontrer, citoyens, que le travailleur, — quelques rares professions exceptées — a dû le plus souvent recourir à la grève pour obtenir une augmentation de salaire, une réduction d'heures de travail, ou faire cesser une injustice. Laissez-moi cependant vous en citer un exemple caractéristique.

Les charpentiers de Paris gagnaient 30 centimes à l'heure, en 1791. Eh bien ! voici comment ils ont obtenu le salaire actuel. En 1822, grève ; prix de l'heure porté à 35 centimes. En 1833-34, grève ; résultat 40 centimes à l'heure. En 1845, grève retentissante, résultat 50 centimes. En 1862, grève ; résultat 60 centimes. En 1876, grève ; résultat 70 centimes. En 1879, grève ; résultat 80 centimes à l'heure. Enfin la dernière grève, en 1881, a échoué complètement ; cet échec est surtout dû à la demande de 20 centimes d'augmentation à l'heure.

Donc, sept grèves en un siècle qui ont produit six augmentations successives ayant fait monter le salaire de 3 à 8 francs par jour. Et ce salaire, il importe de le remarquer, a été payé non pas à quelques privilégiés de la profession, non pas à ceux-là seulement qui ont pris une part active à ces luttes — lesquels tout au contraire en ont été le plus souvent victimes — mais bien à tous les membres, les faibles comme les mieux doués de la profession.

Oh ! j'entends d'ici les lamentations plus ou moins sincères de nombre de gens, me montrant, des larmes dans la voix et à grand renfort de statistiques, que les grèves sont l'abomination de la désolation, qu'elles sont néfastes à l'industrie, dangereuses pour

le pays et même nuisibles à l'ouvrier, puisque un quart seulement d'entre elles, en moyenne, se terminent par une réussite complète pour l'ouvrier.

Aux deux premiers griefs, je répondrai que la responsabilité de ces conflits incombe le plus souvent aux patrons qui, de prime abord, repoussent toute modification aux conditions du travail, quand ils ne refusent pas de discuter avec les représentants autorisés de leurs ouvriers, qu'ils traitent alors de *meneurs*.

Quant au troisième grief, d'après lequel les grèves sont nuisibles à l'ouvrier, je ne me fie d'abord guère à cette marque de sollicitude qui pourrait bien être inspirée par la secrète terreur que doit inspirer cette révolte soudaine de travailleurs réclamant une part plus équitable de la richesse qu'ils ont contribué à produire. On nous dit qu'un quart seulement des grèves réussissent à l'ouvrier ; mais j'estime que, dans de telles conditions, il n'en a que plus de mérite de sacrifier ainsi son emploi, sans hésiter, le plus souvent dans un élan de solidarité, et tout en sachant à quels dangers il s'expose, lui et les siens.

Mieux que quiconque, l'ouvrier peut et sait apprécier le mérite de camarades se mettant en grève, pour un motif légitime, sans souci du chômage et de la misère qui peut les atteindre, et uniquement pour agir comme de dignes prolétaires, comme de bons syndiqués. Cet acte énergique est la manifestation d'une notion précise des intérêts généraux et, quelquefois, d'un réel sentiment social ; ce qui justifie la légitime considération dont ses camarades entourent l'ouvrier « qui a fait son devoir » dans une grève.

Donc, à notre avis, la grève est le seul procédé extrême auquel l'ouvrier, pour améliorer son sort, a dû recourir et qu'il devra encore employer, avec autant d'énergie que de prudence, aussi longtemps que des règles précises de morale sociale ne viendront point lui assurer un bien-être relatif, pour lui et les siens.

Au reproche que des désordres peuvent accompagner ces luttes industrielles, j'opposerai cette profonde réflexion du penseur : « Quelque violente que semble toujours la force du nombre, elle finit d'ordinaire par l'être, au fond, beaucoup moins que celle de la richesse » (1).

..

Si les prolétaires peuvent légitimement recourir à la grève

(1) Auguste Comte, *Système de Politique positive*, t. 1<sup>er</sup>, p. 184.

pour défendre et améliorer leur condition matérielle, ils n'ont pas tardé à se rendre compte, surtout depuis le développement de la grande industrie, que pour faire produire à cette arme dangereuse le maximum de profits avec le minimum de pertes, ils devaient se grouper, se discipliner, en un mot constituer une force. De cette nécessité découle l'organisation des Trade-Unions ou syndicats professionnels. Il a fallu aux prolétaires militants une foi robuste et un courage persévérant pour vaincre les résistances des patrons et des riches et aussi les défiances injustifiées de leurs propres camarades envers ces associations utiles et nécessaires ; puis, pour leur conquérir peu à peu une existence légale et surtout le droit de prendre en mains les intérêts matériels et économiques de leur profession respective. Ces militants, convaincus de la légitimité comme de l'utilité des syndicats, ne se sont pas laissés abattre par les mille obstacles qui se dressaient devant eux et, grâce à leur fermeté, en Angleterre d'abord, puis successivement dans les autres pays industriels, le syndicat professionnel, enfin reconnu et accepté par l'opinion publique, remplit son office auquel il s'adapte de mieux en mieux.

Cet office consiste essentiellement à grouper les ouvriers, ce qui décuple leurs forces, ainsi qu'à régler et à coordonner les aspirations légitimes du prolétariat. De plus, il vient opposer un frein indispensable aux exigences du capital qui tend fatalement à se faire une part léonine dans le partage des bénéfices de la production ; ce qui lui est d'autant plus facile qu'aucune autorité, s'appuyant sur l'opinion publique, n'est encore venue dicter, au nom de la morale sociale, les devoirs réciproques des patrons et des ouvriers. En un mot, le syndicat professionnel s'est constitué spontanément, en dépit des entraves de la loi, pour affirmer, avec énergie et persévérance, les droits et les intérêts du travailleur, trop souvent lésés ou méconnus.

Le syndicat est, en outre, pour l'ouvrier, une excellente école où il apprend à connaître la complexité des phénomènes sociaux en même temps que l'importance de ses devoirs de solidarité. Le syndicat fait surgir, pour les placer à sa tête, les hommes dévoués et actifs qui trouvent, dans les mille difficultés de son fonctionnement et de son développement, un terrain propre à l'exercice de leurs facultés morales et pratiques, souvent très supérieures. Et ces hommes, s'ils savent se placer assez haut, peuvent puiser dans l'accomplissement de cette tâche, souvent ingrate, la profonde satisfaction de se rendre utiles, non pas à quelques individualités, mais à l'ensemble des membres de leur profession.

\*  
\* \*

Mais les ouvriers syndiqués, poursuivant leur propre évolution, comprirent très vite que le syndicat local était impuissant à atteindre son but, et à résoudre les graves problèmes qu'ils s'étaient posés. C'est alors que surgit l'idée de grouper, de fédérer nationalement les syndicats de la même profession. Ce fut comme toujours le travailleur anglais — et je suis bien heureux de lui en témoigner notre vive reconnaissance à Londres même et devant les délégués du prolétariat organisé — ce fut le travailleur anglais qui sut, le premier, créer ces puissantes Fédérations nationales professionnelles, qui nous inspirent tant d'admiration et que nous devons nous efforcer de constituer sans plus tarder dans chacune de nos professions.

La Fédération nationale de métier est, à nos yeux, l'organe véritablement complet d'une profession groupée, dont le syndicat local représente l'élément constitutif indispensable. Base nécessaire d'une entente et d'une union internationale futures entre les travailleurs, elle forme le second terme, mais le terme décisif, de l'évolution économique du prolétariat.

Seule, la Fédération nationale de métier est et sera de plus en plus capable de protéger et de défendre les intérêts professionnels des travailleurs. Seule, elle peut exercer une réaction salutaire sur les membres de la profession, de manière à leur inculquer la notion précise de leurs devoirs sociaux. Seule, enfin, elle peut obtenir un certain concours de l'opinion publique, qui sera toujours son unique et meilleur appui.

Mais poursuivons davantage cette étude incomplète et rapide de l'évolution moderne du prolétariat.

Vous voudrez bien remarquer, citoyens, que j'ai simplement retracé cette évolution, sans jamais chercher à lui imprimer une orientation préconçue, contre laquelle viendrait protester l'observation judicieuse de ce grand phénomène.

Voici donc lancé ce mouvement fédéral : organisé ici, ébauché ailleurs, mais jouissant partout, parmi les travailleurs, d'une confiance grandissante, gage certain de ses succès de demain.

Et quel spectacle nous offrent-elles ces Fédérations, avec l'immense force collective dont elles disposeront chaque jour davantage ? Oh ! il est bien fait, ce spectacle, pour nous réjouir profondément et exciter nos plus actifs dévouements ; tandis qu'il inspire aux esprits timorés, parmi les privilégiés, je ne sais quelles craintes aussi ridicules qu'injustifiées. Cependant, je me plais à

le reconnaître, plusieurs personnes, parmi les riches, ont su en apprécier le mérite et les effets salutaires.

A mesure qu'elles développent leurs forces, qu'elles prennent conscience d'elles-mêmes, quelles pressentent l'importance de leur fonction sociale, les Fédérations, par une fatalité sociologique sans doute, se règlent, se pondèrent, s'assagissent. Tendent-elles à abuser — quelles sont les forces qui n'ont point ce travers? — aussitôt vous les voyez s'affaiblir, sinon se désagréger. L'observation judicieuse de nos groupements fédératifs démontre, à tout homme de son temps, qu'un courant de modération et de fermeté s'y produit naturellement, dès qu'ils sont parvenus à associer réellement la moitié environ des membres de leur profession. Cela tient à ce que, dans toute Fédération ainsi fortement constituée, ses adhérents, ou plutôt les syndicats qui la composent, réagissent sur l'esprit des militants qui la dirigent, au lieu de suivre docilement et tacitement l'impulsion de ceux-ci; que même, dans certains cas, les syndicats n'hésitent point à contenir et à refréner les tendances du comité directeur, de telle sorte qu'il s'établisse un courant d'opinion de plus en plus irrésistible et généralement conforme aux véritables intérêts économiques de la profession.

Aussi peut-on remarquer que l'esprit de conciliation croît, dans une Fédération, en raison même de la force active dont elle dispose. De plus, nous osons affirmer que les Fédérations professionnelles deviennent, dès qu'elles sont solidement constituées, un élément d'ordre social par la raison même qu'elles sont un élément de progrès.

Ces quelques considérations nous paraissent expliquer pourquoi, dans toute corporation sérieusement groupée autour d'une Fédération, le nombre des grèves diminue à mesure que l'action et l'influence de la Fédération augmentent; et, en même temps, pourquoi les grèves n'y éclatent pas avant que le comité fédéral ait fait son possible pour éviter la lutte avec les patrons, ce qui met le bon droit souvent du côté des ouvriers quand, malgré ses efforts, la Fédération est obligée de déclarer la grève.

C'est, en effet, grâce aux Fédérations que les grèves sont devenues moins nombreuses, quoique plus retentissantes. C'est surtout grâce à elles qu'il a été possible de créer ces conseils permanents de conciliation et d'arbitrage, dont le premier fut établi en Angleterre, en 1860.

\* \* \*

Le système de la conciliation et de l'arbitrage, voilà le terme

final de ce grand mouvement d'association qui caractérise notre époque. Par cela même qu'il assure aux travailleurs la réalisation graduelle de leurs revendications légitimes, ce mouvement nous permettra de traverser la transition actuelle, tout en nous rapprochant peu à peu de la seule solution possible des conflits industriels, solution dont le système de l'arbitrage nous paraît contenir le germe.

Non pas, j'ai hâte de le dire, que nous pensions que la conciliation et même l'arbitrage puissent jamais faire totalement disparaître les grèves et les conflits. Ce serait une espérance aussi naïve qu'illusoire. Toutefois, les conseils de conciliation ou les arbitres, librement établis et choisis par les deux parties, nous semblent de nature à rendre de réels services. Leurs décisions peuvent, en effet : éclairer et préciser la nature et la gravité du conflit ; établir exactement la responsabilité des patrons et des ouvriers ; enfin obtenir sérieusement le concours et l'appui de l'opinion publique, lorsque l'une des parties aura refusé de se soumettre à des décisions motivées dans de telles conditions de compétence et de bonne foi.

Le mouvement spontané qui s'est produit, en France surtout, en faveur des ouvriers verriers, à la suite du récent et grave conflit de Carmaux, encore présent à la mémoire de tous, et dans lequel le chef industriel a refusé toute discussion contradictoire, vient confirmer cette dernière appréciation.

D'après les services rendus depuis 1860, en Angleterre surtout, par les conseils de conciliation, il nous est permis de croire que cette institution pénétrera de plus en plus dans les usages et dans les mœurs industriels. Quant à l'arbitrage, complément naturel du conseil de conciliation, nous mettons en lui de plus grands espoirs. Nous le croyons appelé à devenir, pendant la période transitoire, une véritable institution sociale, lorsque chaque Fédération aura, après entente avec le patronat sur ce point, choisi son arbitre permanent.

Cette belle et délicate fonction d'arbitre nous paraît d'autant plus importante que — indépendamment des précieux services immédiats qu'elle peut rendre aux travailleurs fortement groupés — elle représente, à nos yeux, une première ébauche d'un pouvoir social nouveau, que nous croyons indispensable à la société moderne, et que Comte réclamait ainsi, dans sa langue abstraite, dès 1848 : « L'organisation normale de l'industrie moderne exige d'abord la reconstruction des opinions et des mœurs, d'après la libre adoption d'une doctrine universelle, propre à régénérer

l'éducation générale et à faire surgir, dans tout l'Occident, une nouvelle autorité spirituelle (c'est-à-dire une autorité morale et sociale), arbitre naturel des conflits industriels » (1).

Que sont-ils, en effet, sinon les organes spontanés d'une autorité sociale, nouvelle dans le monde, et très empiriquement établie jusqu'ici, les hommes tels que MM. Mundella, Crompton, Rupert Kettle, le cardinal Manning, Thomas Burt, etc., qui, en Angleterre, ont rempli les hautes fonctions d'arbitres, dans des conflits industriels, quelquefois d'une extrême gravité.

Nous serions très désireux, au surplus, que des délégués des Fédérations nationales d'Angleterre viennent, pendant ce Congrès, nous exprimer, avec l'autorité qui s'attache à leur opinion en cette matière, le degré de confiance qu'ils accordent aux conseils de conciliation et aux arbitres, considérés comme étant propres à atténuer l'intensité des conflits industriels et à réaliser, dans des conditions satisfaisantes, les légitimes revendications du prolétariat.

Quant à nous, prolétaires ralliés à la doctrine positiviste, nous croyons devoir recommander aux travailleurs, et pour les motifs, tirés des faits eux-mêmes, que je viens de vous exposer brièvement :

1° L'organisation syndicale et surtout fédérale, comme étant de nature à constituer de véritables forces collectives ;

2° La création, par les fortes Fédérations, de conseils permanents de conciliation, complétés par l'adjonction d'arbitres également permanents.

Nous considérons ces mesures, non comme pouvant supprimer les grèves, ce qui est impossible, mais comme un moyen efficace de diminuer la fréquence et l'acuité des conflits, en établissant entre le capital et le travail des rapports plus réguliers et plus équitables ; — ce qui assurera finalement aux prolétaires la part de bien-être, de sécurité, de loisir et d'instruction que comporte l'état actuel de la civilisation, part qui leur est légitimement due, en échange de leurs services sociaux.

---

(1) Auguste Comte. Rapport à la Société positiviste sur la question du travail, mars 1850. *Revue Occidentale* du 1<sup>er</sup> septembre 1883, p. 198.



## III. — DISCOURS DE M. VORBE

CONSEILLER MUNICIPAL

A LA DISTRIBUTION DES PRIX DES ECOLES COMMUNALES  
DU XIX<sup>e</sup> ARRONDISSEMENT.

MESDAMES ET MESSIEURS, CHERS ELÈVES,

Les individus, comme les sociétés, se créent des traditions auxquelles ils conforment leur conduite. En agissant ainsi ils obéissent au besoin d'ordre qui les domine. Ils ont le sentiment vague ou précis, suivant que leur action est spontanée ou réfléchie, que la substitution de l'arbitraire à la règle dans toute existence est pour celle-ci une cause de trouble, d'arrêt du développement, et le désir d'écarter tout ce qui peut nuire à l'épanouissement de leurs facultés intellectuelles et morales, au progrès normal de leurs forces physiques, les porte à ajouter un mode de conduite particulier à la règle générale qui leur est imposée par la société au sein de laquelle ils vivent.

Le milieu dominant l'individu et chaque société imprimant son caractère particulier, son génie spécial aux personnalités qui la composent, il est naturel et légitime que j'aie ma tradition comme tous mes semblables. Et quand je sais que les orateurs qui parlent à nos distributions de prix, qu'ils fassent partie de notre municipalité si active, si dévouée, si soucieuse des intérêts de la patrie, de la prospérité de la République, ou qu'ils appartiennent au personnel de l'instruction publique, comme notre excellent inspecteur M. Jarach qui, grâce à sa vaste érudition et à son culte de la beauté littéraire, a l'enviable don de savoir revêtir d'une forme toujours nouvelle l'inépuisable sujet de l'instruction et de l'éducation qu'il possède si admirablement et de se servir habilement de l'agréable pour faire accepter l'utile, lui donner droit de cité dans les esprits; quand je sais que notre personnel enseignant qui a l'énergique sentiment de sa mission civilisatrice, de ses devoirs envers la Famille, la Patrie et l'Humanité, la haute et forte conscience de sa maternité et de sa paternité intellectuelle et morale reçoit tous les ans, de bouches éloquentes, les éloges mérités qui lui sont dus; quand je sais encore que de sympathiques conseils sont donnés aux familles qui nous honorent de leur présence, que de sages encouragements sont prodigués aux jeunes héros et aux gentilles héroïnes de nos luttes pacifiques, je considère comme une obligation impérieuse pour moi de ne pas ajouter une parole superflue aux discours autorisés, aux allocutions si pleines d'une émotion communicative que vous avez l'habitude d'entendre et d'applaudir à ces solennités annuelles.

Respectueux de votre temps, mon intention première était de rester fidèle à ma tradition; mais, comme un écho lointain d'une

parole éternelle qui passe à travers les âges, du fond des siècles qui recouvre sa cendre, j'entends la voix grave du moraliste qui me dit :

« Ne néglige pas l'occasion d'accomplir ton devoir, fais présentement tout le bien que tu pourras, hâte-toi : car tu ne ressaisiras pas l'heure fugitive ; hâte-toi, car ta vie étant épuisée d'un jour, demain te sera moins favorable qu'aujourd'hui. »

Et, sachant que les êtres aimés que la mort a effleurés de son aile sont toujours présents dans notre cœur, en venant dire au grand artiste qui préside cette cérémonie familiale, profondément respectable par ses vertus républicaines, triplement couronné par ses travaux esthétiques, la vieillesse et le malheur, en venant dire à M. Mathurin Moreau combien je suis touché de lui voir subordonner sa douleur particulière à son devoir civique, combien est réconfortant, généreux et salutaire l'exemple qu'il donne à notre jeune génération, j'obéis au commandement impérial d'un des plus grands législateurs religieux de l'Humanité ; et en me conformant à cet ordre moral j'ai l'absolue conviction de n'être pas seulement en communauté de sentiments et d'idées avec l'Assemblée devant laquelle j'ai l'honneur de parler, mais avec toute la population du XIX<sup>e</sup> arrondissement.

Universellement le moins est subordonné au plus. L'heure qui sonne et celle qui va sonner sont dans la dépendance des temps écoulés auxquels elles appartiendront bientôt, comme les planètes sont dans la dépendance des soleils.

Qu'elle soit sociale ou individuelle, la tradition étant l'expression d'habitudes acquises, est l'affirmation de la domination souveraine du passé sur le présent.

Toute fête populaire, quelque modeste, quelque humble qu'elle soit, est une sorte de culte rendu à nos ancêtres, le symbole de la glorification de tout le travail humain. Et la solennité à laquelle nous assistons aujourd'hui n'est-elle pas d'abord un acte de piété filiale, un éclatant hommage rendu à cette langue française qui a nécessité le concours de tant de peuples et de tant de siècles pour sa formation, et que tant de grands, de si lucides, de si merveilleux génies ont faite illustre et immortelle ; les drapeaux qui ornent cette salle, et dont les trois couleurs réjouissent nos regards, ne nous rappellent-ils pas le lent, douloureux et glorieux acheminement de la France vers l'unité symbolisant la paix à l'intérieur, le respect au dehors, la puissance et la grandeur.

Nos cérémonies scolaires ne sont-elles pas surtout la glorification de la science et de l'art destinés à satisfaire les multiples besoins de notre nature si complexe, les aspirations les plus élevées de nos sentiments affectifs ? Sachant que l'Humanité, « ce grand être qui vit toujours et qui apprend sans cesse » a été contrainte de passer par d'innombrables phases avant d'arriver à la phase actuelle, et, considérant que les efforts sont plus méritoires que le succès, dans les résultats acquis, dans les progrès réalisés ne devons-nous pas commémorer, exalter l'immense labeur dont cette acquisition, cette réalisation est le fruit ?

Gloire donc à la science, cette vérité sainte si péniblement conquise par le travail intellectuel de nos pères, héritage sacré du passé que nous devons transmettre augmenté à nos descendants ;

gloire à la science qui, en multipliant nos moyens d'action sur les choses, diminue la distance qui sépare le pouvoir de la volonté, grandit la dignité de l'homme, l'affranchit, le libère chaque jour davantage de l'aveugle fatalité ; gloire à la science, complétée par l'art, couronnée par la morale, qui tend à substituer le règne bien-faisant de l'esprit à la souveraineté douloureuse et dégradante de cette force brutale que tant d'ignorants ou de criminels ambitieux invoquent pour améliorer le sort des souffrants, modifier miraculeusement les institutions existantes, comme si l'intelligence éclairée par le savoir, comme si la raison, expression de l'accord de nos conceptions et de notre conduite avec la réalité découverte et démontrée par la science, n'était pas la plus puissante de toutes les forces et la seule capable de satisfaire l'impérieux besoin de justice qui tourmente les sociétés humaines. « Poussons à la vraie science, a dit excellemment l'historien Mignet, car il n'y a pas une vérité qui en détruisant une misère ne tue un vice. »

L'histoire, cette science qui a pour objet l'étude de l'enchaînement des événements humains, la reconnaissance ou la recherche des lois qui président à la manifestation des phénomènes sociaux dans l'espace et à leur succession dans le temps, en faisant ressortir l'insignifiance des efforts individuels comparés à l'inappréciable concours de l'ensemble des générations éteintes dans la création des richesses dont nous jouissons actuellement, nous montre, vivantes et dominatrices, inflexibles et inviolables, les lois de continuité et de solidarité qui relient entre elles toutes les sociétés humaines au sein du plus profond passé, du plus vaste présent et du plus lointain avenir, l'histoire, dis-je, nous révèle l'imposante, l'incomparable grandeur de la Patrie et de l'Humanité, et confirme pleinement cette éloquente parole d'un écrivain contemporain : « Les vivants sont faits de la poussière des morts. »

Apprenez, chers élèves, que « la vie nous a été donnée pour que nous échangions chaque minute qui la compose contre une parcelle de vérité ». Que le culte du vrai dans sa triple manifestation logique, esthétique et morale soit donc le constant objet de vos actions, que le service de la Famille, de la Patrie et de l'Humanité soit le but suprême de votre existence tout entière. Dévouez-vous au bien commun, travaillez à l'utilité générale, et quelque grande et difficile que soit la tâche à accomplir, ne considérez jamais votre effort comme superflu. Souvenez-vous que l'Océan est composé de gouttes d'eau.

Je glorifie dans le passé tous ceux qui ont marché dans cette voie, et en vous je salue la France de demain.

Et maintenant, Mesdames et Messieurs, permettez-moi de m'autoriser des considérations qui précèdent et de la belle parole de Victor Hugo :

« Vous qui passez, donnez une pensée aux morts » pour saluer en la chère morte qui est plus présente que jamais dans le cœur de notre sympathique Maire, pour vénérer en <sup>Mme</sup> Mathurin Moreau toutes les immortelles inspiratrices des poètes du burin, du pinceau et de la plume, des plus grands, des plus glorieux, des plus brillants interprètes du beau, dont l'éminente influence a suscité tant de chefs-d'œuvre, contribué à l'expression de si nobles senti-

ments, d'idées si généreuses, d'aspirations si élevées, à la production d'actions si héroïques ; créations gracieuses, grandioses ou sublimes, éternellement admirables, qui ont embelli l'existence des générations éteintes, les ont fait vivre de la vie supérieure de l'esprit et du cœur, et qui continueront à satisfaire l'inextinguible soif d'idéal dont l'âme humaine est altérée, charmeront nos plus lointains descendants, raviront et consoleront jusqu'aux derniers humains qui contempleront pour la dernière fois les rayons affaiblis, les lueurs pâlisantes du soleil mourant.

Paris, 31 juillet.

---

# VARIÉTÉS

---

## I. — PATRIOTISME LOCAL

(Par Madame Frédéric Harrison).

Nous avons, dans ces derniers temps, beaucoup entendu parler des maux politiques et sociaux qui sont inhérents à la propriété foncière, et un romancier distingué a même découvert un nouveau péril pour l'Humanité dans l'ardent désir, qui anime les paysans des contrées où le paysan est propriétaire, d'acquérir de nouvelles terres! Cependant ceux qui ont le bonheur de prendre part encore aux travaux de la moisson et de participer à la gaieté générale qui y règne ne peuvent s'empêcher d'éprouver de nouveau cette impression profonde de la liaison intime du paysan avec le sol. Quand nous le contemplons dans le simple cadre formé par sa maison, son verger et son champ, nous nous disons : « Les dangers de toute espèce que peut susciter, dans la société, l'avidité, qu'elle soit pour l'argent, la terre ou le pouvoir, sont peut-être terribles ! » Mais en voyant cet homme semer et récolter, labourer la terre et l'améliorer, forcer la nature à lui livrer sa nourriture, éprouver de la joie dans le travail, nous ajoutons : « Heureusement, ce sont là des instincts primitifs étroitement unis à la fibre même de notre nature et que l'on trouve, en creusant profondément, aux racines de toute existence sociale. » Notre intention n'est pas de discuter la question de la propriété foncière. Il est à présumer que personne n'ose contester que la continuité et la persistance sont des conditions essentielles de la vie des champs et il paraît certain qu'en supposant le paysan transporté d'un endroit à un autre comme un ouvrier de filature et strictement contraint à un seul genre de travail, selon la saison, il ne produirait pas autant que sous le système actuel

et perdrait à coup sûr tout entrain au travail, en même temps que disparaîtrait la poésie de la campagne.

Il est bien à regretter qu'il existe si peu d'études de la vie rurale dans la littérature anglaise. Pour beaucoup de gens, le paysan anglais se présente sous la forme d'un être inculte, un peu brute, aux poings solides, tout à fait taciturne et aimant à se renfermer dans son égoïsme. On ne lui accorde guère d'imagination ou de sensibilité pour le beau, ni beaucoup d'attachement pour l'endroit où il est né. On lui dénie le romanesque amour du *Highlander* pour ses montagnes, du Suisse ou de l'Allemand pour la *Heimathland*. Il est censé aimer, surtout le bœuf et la bière d'Angleterre, et, en dépit de quelques charmantes idylles et poèmes provenant du Dorsetshire, il est resté sans interprète. Aucun Burns local n'est encore venu nous chanter les joies et les chagrins du laboureur de Kent ou du pâtre de Sussex. Mais nous devons nous rappeler que, sous ce rapport, les comtés diffèrent les uns des autres. L'homme du Yorkshire diffère de celui du Cumberland comme le travailleur de l'Essex de celui du Kent. On ne saurait abstraire le paysan du sol sur lequel il vit ; il est essentiellement « de la terre » qui l'a nourri.

Cependant, il ne serait pas difficile, pour toute personne sympathique, de découvrir avec peu de peine des villages, à moins de 60 kilomètres de Londres, où règne un vrai patriotisme local, où les vieilles traditions persistent dans toute leur vigueur, côte à côte avec les Comités des écoles et les Conseils des paroisses. On y rencontre des familles habitant la même maison de génération en génération et s'y attachant avec une véritable vénération ; on y voit le fils suivant le même métier que son père. Des hommes du même nom et de la même famille ont fourni au village, pendant tout ce siècle, le forgeron et le charpentier. Quelle joie doit éprouver le vieillard qui contemple l'arbre planté de ses mains dans sa jeunesse, ce lot de terrain conquis sur la terre inculte ! Demandez à n'importe quelle bonne femme de vous montrer ses trésors : elle irait chercher, parmi de vieilles paperasses fanées, des ballades du temps peut-être de Nelson, provenant vraisemblablement de quelque fils marin ou soldat. Depuis longtemps il dort

sous les ifs du village, mais le souvenir est encore vif des prouesses dans lesquelles le village a participé, des menaces d'invasion, de la grande guerre, et de la disette qui s'ensuivit. L'amour du pays pour le soldat ou le marin, comme pour ces milliers de travailleurs qui soutiennent la vie même de l'Angleterre, implique pour chaque individu l'amour de quelque tranquille coin de campagne, d'une chaumière où il joua étant enfant et où se trouve peut-être encore sa vieille mère ; d'un cimetière où reposent ses ancêtres. Indubitablement, l'amour de la Patrie implique plus que cela, mais sans ce simple attachement naturel à quelque morceau de terrain entrevu à travers le reflet des tendres souvenirs, le patriotisme perdrait l'essence même de sa vitalité. Nous nous exposerions à un véritable danger si, dans notre ardeur pour le bien de la nation ou pour d'autres réformes, nous venions à diminuer, si peu que ce soit, l'amour du paysan pour la terre qui le porta.

Heureusement pour l'Humanité, le patriotisme local paraît être un instinct primitif, car il se développe là où il reçoit en apparence le moins d'impulsion ; on le trouve dans les quartiers les plus vulgaires de nos grandes villes. Nous connaissons tous l'amour du Français pour son beau Paris et les habitants de Londres sont familiers avec le même sentiment. Nous n'avons pas oublié l'affection de Charles Lamb pour les vieilles impasses où il avait vécu ; le Dr. Johnson, Landor et Coleridge, tous ont ressenti la piété du Londonien ; Rudyard Kipling nous a chanté l'amour du jeune soldat, campé sur les plaines arides de l'Inde, pour la grande rue de Kensington ; la *Edgware Road* elle-même a eu ses fidèles ! Sans aucun doute, les grandes améliorations qui ont été faites dans ces dernières années et l'œuvre du Conseil municipal de Londres ont stimulé la tendance à embellir notre grande cité et à la rendre digne à tous égards de la nation qu'elle représente. Nous pouvons être assurés que le patriotisme local a été de nouveau éveillé et partout affermi par la convergence de ces efforts.

Il est fort curieux que, pendant que le paysan a ses racines profondément enfoncées dans sa terre natale et que l'aristocrate vit pour la plupart dans des palais élevés depuis long-

temps par l'énergie de ses ancêtres, la nombreuse classe moyenne, commerciale et professionnelle, est absolument en divorce avec la terre et ne possède aucune habitation permanente, soit à la ville, soit à la campagne. De combien de familles de la classe moyenne peut-on dire que le fils habite la maison dans laquelle son père mourut ? Combien d'hommes peuvent-ils se vanter d'avoir passé toute leur vie dans une seule maison, voire même dans un seul endroit, de l'enfance jusqu'au mariage ? ou du mariage jusqu'à la vieillesse ?

Le bourgeois anglais désire pouvoir changer de demeure plusieurs fois dans sa vie ; il aime la mobilité, la variété. Au dire d'un cynique, un changement de maison est un procédé infailible pour monter d'un degré l'échelle sociale. Ce sont sûrement là des symptômes nouveaux anormaux, qui peuvent être dangereux dans notre vie sociale et dont nous ne pouvons guère encore prévoir les conséquences. Les classes moyennes anglaises sont à errer sur la surface de la planète, ne trouvant de repos nulle part, ne se créant aucune attache solide, vivant le plus souvent dans la plus complète ignorance de leurs voisins et de ceux qui pourvoient à leurs besoins. La vie à la campagne, malgré tous ses inconvénients, est néanmoins réchauffée par des sentiments de solidarité humaine ; la vie en ville, avec tous ses avantages, n'est trop souvent que le plus cruel isolement. Les classes moyennes doivent être rendues responsables du manque de sentiment sympathique dans la vie urbaine. Elles n'ont pas le temps de se créer des relations sociales, sauf avec les riches et les puissants, ou de les conserver quand elles sont faites ; elles sont toujours à grimper — « à marcher en avant » diraient-elles — et comme elles perdent peu à peu la notion de toute piété locale, elles courent aux quatre coins du globe à la recherche de la richesse, des aventures, de la renommée et de la bonne fortune. On ne doit pas s'étonner si, chez certaines d'entre elles, le patriotisme a pris d'étranges formes, car, au véritable sens du mot, elles n'ont pas de foyer.

E.-B. HARRISON.

(Traduction de M. A. Richer).

---



## II. — LE POSITIVISME ET L'OPINION

COMTE ET SON SIÈCLE, PAR M. FAGUET.

Le nouveau livre de M. Alfred Fouillée : *Le mouvement positiviste et la conception sociologique du monde* mériterait assurément une étude spéciale, que nous aurions volontiers entreprise, si nous n'avions trouvé dans la *Revue bleue* du 8 août une critique très fine et très pénétrante de cette œuvre considérable. Nous avons été heureusement surpris de voir au bas de cet article la signature de M. Faguet.

Nos lecteurs n'ont peut-être pas oublié que, dans un de nos précédents numéros, tout en louant l'effort considérable de M. Faguet pour s'assimiler l'œuvre d'Auguste Comte, nous lui signalions, peut-être un peu vivement, les lacunes évidentes de son travail et l'insuffisance de ses conclusions. Nous n'osons pas nous flatter d'avoir contribué à exciter chez lui de nouvelles méditations ; cependant nous sommes obligés de reconnaître que sa critique actuelle dénote une réelle amélioration de ses vues à l'égard de Comte et de sa doctrine.

Il a très justement fait ressortir que la prétention de M. Fouillée de réconcilier le Positivisme et l'idéalisme dans une synthèse supérieure n'est qu'un retour offensif de la vieille métaphysique cherchant vainement à reconquérir le terrain perdu.

Les lecteurs de la *Revue occidentale* se féliciteront de retrouver sous la plume alerte de M. Faguet des arguments qui leur sont depuis longtemps familiers et sa démonstration, d'un tour aisé et spirituel, dépouillée de tout pédantisme d'école ne leur en paraîtra que plus frappante.

Nous nous en voudrions de retarder, par de plus longues considérations, le plaisir que nos lecteurs trouveront certainement à entendre M. Faguet, et nous reproduisons *in extenso* l'article qu'il a publié sous le titre si heureusement choisi de : *Comte et son siècle*.

Lucien MOMENHEIM.

## COMTE ET SON SIÈCLE

Ce devrait être là le titre du dernier livre, très beau, de M. Alfred Fouillée, intitulé : *le Mouvement positiviste et la*

*conception sociologique du monde.* Ce que ce livre démontre le plus, c'est qu'Auguste Comte n'est ni plus ni moins que le roi de la pensée du XIX<sup>e</sup> siècle.

Issu d'un rapport à l'Académie des Sciences morales sur un concours pour le prix Bordin (1895), rapport qui n'est pas très loin d'être un chef-d'œuvre, ce volume contient en substance : 1<sup>o</sup> une histoire de l'influence du comtisme depuis 1850 jusqu'à nos jours ; — 2<sup>o</sup> une critique du comtisme ; — 3<sup>o</sup> une doctrine tenue pour plus large que le comtisme et opposée à lui.

La première partie nous montre, — avec une précision très estimable, une information très étendue et une concision que l'immensité du sujet imposait, et qui est chez l'auteur une qualité presque nouvelle, — le Positivisme et l'évolutionnisme qui en dérive, renouvelant les sciences mathématiques, les sciences physiques, les sciences biologiques, donnant non seulement un point de vue nouveau, mais une série de points de vue nouveaux à l'esprit humain. Cette suite d'analyses est faite excellemment et n'est pas autre chose, s'il vous plaît, qu'un tableau de l'intelligence européenne au XIX<sup>e</sup> siècle. Quelques points de détail en seront contestés par plus compétents que moi ; mais le tableau me semble très juste en son ensemble, très instructif, très suggestif aussi ; et il est un monument élevé à la gloire de notre grand philosophe, de celui que nous pouvons opposer, je veux dire équaler, à qui que ce soit des philosophes d'Allemagne ou d'Angleterre, de celui que la postérité considérera sans doute comme la plus haute gloire française du XIX<sup>e</sup> siècle.

M. Fouillée ne lui marchandé point, du reste, l'admiration, la vraie, celle qui n'est pas « amas d'épithètes », mais amas de preuves démontrant l'étonnante influence qu'Auguste Comte a exercée si vite et qu'il garde encore, et qui, à mon avis, malgré les apparences, ne fait que croître. — Ce qui est en baisse actuellement, et, si vous voulez que je vous le dise, je n'en suis pas fâché, c'est le comtisme très restreint et très indigent que des disciples assez bornés d'Auguste Comte avaient donné au public français comme étant le comtisme. Ce qui est plutôt en hausse, c'est la doctrine complète de Comte,

au moins son esprit général, ses vues sociologiques, historiques, politiques et même religieuses ; moins, bien entendu, les enfantillages, parfaitement négligeables. Littré baisse, mais Comte remonte, et à prendre les mots dans le sens de la langue courante, le Positivisme est souffrant, mais le comtisme se porte bien.

Ce n'est pas M. Fouillée qui prétend le contraire, et son livre, destiné à instituer une critique sévère de la doctrine de Comte, commence par montrer avec éclat combien Comte fut grand, et comme il est vivant encore, et en dernière analyse c'est surtout cela que ce livre prouve.

Comment en serait-il autrement ? M. Fouillée, esprit très original, du reste, il l'a assez prouvé, a eu une très grande influence sur notre cher et si regretté Guyau ; mais, ensuite et en retour, Guyau a eu une immense influence sur M. Fouillée. Or il n'y a jamais eu d'esprit plus pénétré de comtisme que Guyau. Guyau est le fils spirituel d'Auguste Comte. C'est un Comte poète, ce qui fait une grande différence, je l'accorde ; et un Comte qui sait écrire, ce qui en fait une plus grande encore, je le reconnais ; mais c'est un Comte, *medullitus*. Sa manie idiosyncrasique, — car, convenons-en, M. Fouillée, c'était une manie très ingénieuse, très spirituelle et très féconde, mais c'était bien une petite manie, — sa manie de voir la sociologie en toutes choses, de tout ramener à la sociologie, de tout faire rentrer dans la sociologie, et de tout voir du point de vue sociologique (oh ! qui nous délivrera de la tendance monique ; le monisme est une monomanie), cette manie sociologique, c'était l'empreinte même de Comte, l'empreinte profonde, la greffe qui avait changé la nature même des tissus. Disons populairement qu'il avait Comte dans le sang. On peut comprendre à quel point, par l'influence de Guyau sur M. Fouillée, a été considérable l'influence sur M. Fouillée de Comte lui-même.

Mais M. Fouillée, d'abord, est très original, ensuite est très autonome, et enfin a un goût de la conciliation qui fait qu'il n'est jamais de l'avis de personne... Naturellement ! Et c'est un éloge que je lui fais ! Il y a deux façons d'être conciliateur, celle de maître Jacques et celle des maîtres. Celle de

maître Jacques consiste à dire *oui* à droite, et *vous avez raison* à gauche; celle des maîtres consiste à chercher la conciliation de deux doctrines opposées dans une troisième plus élevée que toutes les deux; de sorte que c'est très bien; mais ça consiste d'abord à n'être de l'avis ni de la gauche ni de la droite, et cela force même à n'être de l'avis ni de la droite ni de la gauche; et, quand cela devient une habitude et un besoin de l'esprit, cela consiste à n'être jamais de l'avis de personne; et c'est ce qui me faisait dire que la méthode de conciliation avait pour trait essentiel de n'être de l'opinion de qui que ce soit, et que M. Fouillée était trop conciliateur pour ne pas faire la guerre à tout le monde.

Aussi, profondément convaincu de la grandeur du vrai Positivisme, et très pénétré de vrai Positivisme, a-t-il cependant cherché, dans ce livre, d'abord à montrer ce qui manque au Positivisme, ensuite à le compléter par une doctrine plus vaste, où Positivisme et idéalisme se trouveraient réconciliés.

Ce qui manque au Positivisme d'après M. Fouillée, c'est : une psychologie; un fondement solide de la morale; une vraie religion.

Comte a méprisé la psychologie, l'observation intérieure, l'étude de nous sur nous, et a même nié qu'elle fût possible. Immense lacune. Le Positivisme s'est privé par là des données directes de la conscience, de sorte qu'il fait de la sociologie sans connaître l'homme, bâtit une maison sans connaître la résistance des matériaux. C'est un vice fondamental de la doctrine.

Je reconnais que Comte n'aimait pas la psychologie et la niait, et je ne suis pas du tout de son avis sur ce point. Cependant ne nous laissons pas trop séduire au prestige des mots. Comte ne veut pas de psychologie. Soit; et encore...; mais soit, pour aller plus vite. Seulement, d'une part il veut une biologie et une physiologie aussi complètes et aussi approfondies que possible; d'autre part il veut une sociologie aussi complète et aussi approfondie que possible.

Et vous savez ce que c'est que la sociologie pour Auguste Comte. Ce n'est pas une sociologie abstraite, ce n'est pas une sociologie mathématique, ce n'est pas une mécanique sociale.

— Et ce n'est pas non plus une sociologie comme celle qu'on nous sert trop souvent aujourd'hui, une sociologie toute pénétrée de zoomanie, une sociologie calquée sur un manuel d'histoire naturelle, cette sociologie que j'ai appelée quelque part de la politique zoologique. Rien n'est moins comtiste que cette tendance. Comte a dit : « Sociologues, gardez-vous de la biologie. » Sa sociologie à lui, c'est une sociologie non pénétrée d'histoire naturelle, mais d'histoire, c'est-à-dire d'histoire humaine ; une sociologie qui cherche à connaître et à distinguer les états successifs de l'Humanité ; une sociologie à base historique, à base historique insuffisante, je le sais, — Comte n'était pas assez historien ; mais il faut considérer et ce qu'a été Comte et ce qu'il voulait que ses disciples fussent. Il a fait une sociologie qui déjà était historique, et il a voulu, surtout, qu'on fît de la sociologie qui fût à base d'histoire. Voilà certainement sa tendance et sa doctrine.

Or, il n'y a dédain de la psychologie qui tienne : l'homme étudié biologiquement et psychologiquement, d'une part, comme animal ; l'homme étudié, d'autre part, dans l'histoire et par l'histoire, comme homme ; il n'y a pas à dire, c'est, tout compte fait, l'homme étudié. Entre ces deux études qui empiètent sur lui des deux côtés, je ne sais pas trop ce qui peut bien rester de lui qu'on n'étudie point.

Il reste le domaine propre de la psychologie, me dira-t-on. Mais la psychologie se résout d'une part en physiologie, et d'autre part en enquête historique. Quand vous connaîtrez d'une part le rapport et les organes de l'âme humaine, d'autre part ce que l'homme a fait depuis qu'il existe, avec son âme et avec son corps, je crois que vous connaîtrez son âme.

— Excepté son âme elle-même.

— Ah ! nous y voilà ! Excepté le fonds, le tréfonds, la substance, le moi, le moi intime, le moi sanctuaire, le Moi avec une majuscule. Je sais bien. Derrière toutes les manifestations du moi, il y a le moi lui-même, qu'on n'atteint pas indirectement, mais qu'on atteint par l'observation intérieure ou plutôt qu'on sent directement par la conscience. Oui ; mais ce moi là est bien mystérieux. Il y a au fond de nous-même un domaine métaphysique où l'obscurité commence, sinon l'in-

connaissable, et ce que je suis en moi, déduction faite de tout ce que je peux savoir en m'étudiant dans mes organes d'une part et dans ce que je fais d'autre part, voilà ce que j'aurai toujours quelque peine à démêler.

En résumé, en paraissant proscrire la psychologie, Comte n'a éliminé que la métaphysique psychologique.

On dit encore : Ce qui manque au Positivisme, c'est un bon fondement de la morale. Une morale consiste à juger les faits « par rapport à un idéal supérieur aux faits eux-mêmes » et à donner des lois de conduite en conséquence. La morale positiviste peut-elle le faire ? Elle recommande d'être utile à l'Humanité, de se sacrifier à l'Humanité, d'aimer, d'adorer l'Humanité. Fort bien ; mais sur quoi le recommande-t-elle ? Pourquoi faut-il que j'adore l'Humanité ? Le chrétien, au moins, répond : « Parce que Dieu le veut. » Le kantiste, au moins, répond : « Parce que la conscience le commande. » Voilà des raisons. Le Positivisme ne donne pas de pourquoi. Sa morale est subordonnée, c'est assez drôle, à un acquiescement de vous à sa morale. Joli passage de M. Fouillée à ce sujet : « Si, *par hypothèse*, vous désirez tel objet, par exemple votre maximum de vie ou de bonheur, voici les moyens scientifiques de l'obtenir. Si, *par hypothèse*, vous êtes altruiste et désirez le bonheur général, voici les recettes scientifiques qui l'assurent... » — En d'autres termes, si vous trouvez bon ce que je dis, vous ne sauriez mieux faire que d'y adhérer.

C'est à peu près cela, mon Dieu, je le reconnais. Comte n'a jamais dit pourquoi il fallait que je me sacrifiasse à l'Humanité. Il n'a même jamais dit, je crois, *qu'il le fallût*. Non : il dit : « La morale, c'est l'altruisme » ; mais la raison dernière de la morale, il ne la donne pas.

Au fond, vous savez, ça m'est à peu près égal. Une morale porte en soi-même sa raison d'être préférée, aimée et pratiquée. Je ne remarque pas que Jésus, qui est, quoi qu'on die, un moraliste assez considérable, ait donné bien souvent les raisons de sa morale. Il les donne quelquefois, parce qu'il est déiste ; mais c'est assez rare. Le plus souvent, il dit simplement : « Soyez purs, simples, résignés, charitables ; aimez-vous les uns les autres. » — Et la raison pourquoi il faut être

tout cela ? — La raison ? La raison ? La raison, c'est que c'est sublime.

En général, un fondement qu'on donne à la morale l'affaiblit plus qu'il ne l'assure, tout comme une sanction donnée à la morale la détruit au lieu de l'achever. Guyau avait bien vu cela dans son *Esquisse d'une morale sans obligation ni sanction*. Une morale vaut, par elle-même, par le sentiment qu'elle donne à ceux qui l'écoutent qu'il n'y a rien meilleur qu'elle.

J'ajoute que si Comte ne donne aucune raison de sa morale, à proprement parler, il lui donne bien un principe, c'est-à-dire une idée générale qui l'enveloppe, qui embrasse tous les faits et qui par conséquent est « supérieure aux faits eux-mêmes ». C'est sinon une raison, du moins une généralisation qui donne à ses préceptes moraux la cohésion nécessaire. Comte dit : « Soyez altruistes. » Si on lui demande : « Pourquoi ? » C'est vrai, il ne répond rien. Mais si on lui demande : « Qu'est-ce à dire ? » Il répond très bien. Il répond : « C'est-à-dire : soyez hommes. *Vivez conformément à votre nature*. Tout mon système va à prouver que l'homme n'existe que socialement, que dans, pour, et par la société ; que *l'individu n'existe pas* ; que chacun de nous n'existe que dans ses concitoyens, et non seulement dans ses concitoyens, mais dans ses ancêtres et ses descendants. Donc vivez pour l'Humanité, si vous voulez vivre. — « *Si vous voulez vivre* » est bien une hypothèse sans doute ; mais c'est un tel minimum d'hypothèse, que « vivez pour l'Humanité si vous voulez vivre » revient à dire : « Vivez ! Et le moyen de vivre c'est de vivre en autrui. Je vous avertis que l'altruisme c'est la vie elle-même. Vous ne faites, en aimant, que vouloir vivre. »

Cela, si l'on veut, ce n'est pas une raison ; mais, tout de même, ça y ressemble.

Et si Comte n'a voulu donner que quelque chose qui ressemblât beaucoup à une raison, c'est qu'à aller au delà il mettait, là aussi, le pied dans la métaphysique. Toute raison, tout fondement de la morale tiré d'autre chose que de notre nature même, est, par définition, métaphysique. Comte s'arrêtait toujours à ce seuil.

Il ne faut pas tout à fait dire qu'il a donné une morale sans

fondement. Il faut dire qu'il a donné une morale dont il a soigneusement exclu tout fondement métaphysique.

Et enfin le Positivisme n'a pas trouvé une vraie religion. C'est tout à fait mon avis ; je l'ai dit ailleurs ; mais encore il faut s'entendre. Comte, esprit profondément religieux, puisque le fond de sa pensée est l'horreur de l'individualisme ; et profondément mystique même, puisque le fond de son dessein est la suppression de l'individu, et je ne vois pas quel yoghi indien peut être plus mystique que cela ; Comte est convaincu qu'il faut à l'homme « une croyance, comme dit M. Harrison, son successeur, en quelque pouvoir reconnu plus grand que l'individu et même que la communauté, capable de contribuer au triomphe de la justice, et qu'on entoure de respect et d'amour ». Ce pouvoir, c'a toujours été pour les hommes les dieux ou Dieu. Ce pouvoir c'est pour Comte l'Humanité. C'est l'Humanité qu'on doit adorer.

Personne plus que moi n'est persuadé que ce n'est pas très avisé de la part de Comte d'avoir poussé à l'adoration de l'Humanité, l'Humanité n'étant rien moins qu'adorable, et n'y ayant rien de plus malaisé que de prouver aux hommes qu'elle soit digne d'adoration. Mais ce n'est pas, cependant, une raison pour dire que Comte « veut conserver le sentiment religieux sans lui laisser un objet ». Il ne veut, comme le dit très bien M. Fouillée, ni que l'homme adore quelqu'un au-dessus de lui, ce qui est le déisme, ni qu'il adore quelque chose au-dessous de lui, ce qui est le panthéisme. Et il reste qu'il s'adore lui-même dans l'Humanité tout entière. — Eh bien ? C'est peut-être une religion bizarre ; mais ce n'est pas une religion sans objet.

L'Humanité est un objet de religion comme un autre. Le culte des ancêtres chez nos bons Chinois est une manière de religion de l'Humanité. A la condition de ne pas savoir l'histoire, ou de l'oublier, ou de l'idéaliser de la bonne manière, ou de la ramasser et de la ramener tout entière à une dizaine de grands hommes dont on aura soin de ne pas trop approfondir la biographie, on peut adorer l'Humanité. Il y faut bien des précautions, comme nous venons de le voir ; mais enfin ce n'est pas impossible.



Et la vérité, c'est que les hommes ont toujours adoré l'Humanité. Le culte des héros, le culte des demi-dieux, c'est l'adoration de l'Humanité dans ses plus purs représentants. Et le déisme lui-même est mêlé d'adoration de l'Humanité ; puisque jamais les hommes n'ont adoré qu'un Dieu ressemblant à un homme, et ont toujours senti qu'à le dépouiller de ses attributs humains ils l'aimaient moins ; qu'à le spiritualiser ils s'acheminaient à ne plus l'adorer du tout ; qu'à le subtiliser ils le perdaient, et qu'à l'épurer ils le faisaient s'évanouir.

Oui, c'est l'Humanité que l'homme adore en Dieu, une Humanité supérieure, une Humanité idéalisée, une Humanité parvenue à la perfection ; mais encore une Humanité.

Le dieu de Comte, c'était donc Dieu ; mais ici comme plus haut, comme toujours, Comte cherchait à se passer de métaphysique. Son dieu c'était le Dieu des hommes dépouillé de l'élaboration métaphysique qui l'a constitué tel qu'il est ; c'était le Dieu des hommes ramené à ce qu'il est en son fond initial. Il n'est pas très beau en son fond initial ; mais, enfin, il est bien cela, et l'on ne peut pas dire que le proposer à l'adoration, tel quel, ce soit fonder une religion sans objet.

Toute cette critique de M. Fouillée revient donc à dire que Comte a fait une psychologie sans métaphysique, une morale sans métaphysique et une religion sans métaphysique. — En vérité nous nous en doutions bien, que Comte avait voulu éliminer la métaphysique de toutes les conceptions humaines. Il est vrai qu'il était intéressant de nous montrer son travail dans tout le détail où il est entré.

A cette doctrine, qu'il trouve un peu étroite, M. Fouillée oppose la sienne, qui consiste, bien entendu, à ramener la métaphysique que Comte avait écartée et à superposer une métaphysique au Positivisme. Cette superposition est intéressante. Elle consiste à exagérer le Positivisme lui-même, en le poussant dans la direction où il est déjà, mais en lui faisant passer le seuil devant lequel il s'arrêtait. Le Positivisme est une sociologie. Il ramène tout au point de vue sociologique, jusque-là qu'après avoir socialisé les sciences, les arts, etc., il socialise l'Humanité. Il fait de l'Humanité tout entière une société. — *Ce n'est pas assez*, dit M. Fouil-

lée. Le tort de Comte, c'est de ne pas avoir socialisé assez de choses. Ce n'est pas l'Humanité actuelle seulement qu'il faut socialiser : ce n'est pas seulement l'Humanité tout entière, passée, présente et future, qu'il faut socialiser ; il faut socialiser l'univers. « L'extension à l'univers de l'idée sociale, — extension à laquelle le Positivisme se refuse, — nous l'avons toujours crue possible et nécessaire. » L'univers entier est une société, ou plutôt c'est quelque chose qui tend à s'organiser en société. *Nisus* de Renan, « volonté » (c'est-à-dire désir), de Schopenhauer, effort et poussée en avant de chaque atome de l'univers, ne sont pas autre chose que la tendance sourde du Cosmos entier à s'organiser, à s'associer, à former un ensemble harmonieux. Voilà la « conception sociologique de l'Univers ».

Or, c'est cela qui est, qui doit être le fondement vrai de notre morale et de notre religion. Associer l'homme à l'Humanité, dit Comte. C'est bien ; mais ce n'est pas assez. « La partie ne peut ainsi se séparer du tout, et la religion, la morale même impliquent des relations universelles. L'essence de la vie religieuse et morale ne consiste pas seulement dans l'harmonie de l'homme avec soi, ni même avec l'Humanité ; elle consiste encore dans son harmonie avec l'univers. » — « C'est la conscience de l'unité entre notre vrai moi et la loi de l'univers qui constitue la base de la religion philosophique. Le Positivisme a eu le tort de s'arrêter à l'unité du moi individuel avec le moi social. »

On voit que nous voilà revenus au célèbre « ordre universel », cher à l'école cousinienne ; et à nos obligations envers cet ordre universel constituant notre morale ; et à notre culte pour cet ordre universel constituant notre religion.

Ce qu'il y a de curieux et ce qu'il ne faut pas oublier, c'est que Comte lui-même n'avait pas laissé de faire cette « extension » que M. Fouillée lui reproche de n'avoir point faite, et de donner dans cette exagération à laquelle M. Fouillée lui reproche de s'être refusé. Car enfin il ne s'est pas borné à vouloir faire adorer l'Humanité ; il a bien un peu recommandé l'adoration du Grand-Fétiche et du Grand-Milieu, voulant non seulement nous associer à l'Humanité, mais encore nous

obliger envers la Terre et l'Espace ; tant il est vrai que les antimétaphysiciens les plus décidés retombent dans la métaphysique et que les antimythologues les plus résolus ne sont pas sans donner dans la mythologie. — De sorte que les lacunes que M. Fouillée reproche à Comte, il s'en faut de peu que ce ne soit pas M. Fouillée qui les comble et que ce ne soit Comte qui les ait à l'avance comblées lui-même.

Il reste pourtant, en lignes générales, que Comte a voulu faire et a fait une philosophie entière sans métaphysique et que cet effort est un des plus grands qui aient été vus ; et que M. Fouillée cherche à compléter le Positivisme en le pénétrant d'une métaphysique tirée des idées positivistes elles-mêmes ; et que cet effort est intéressant aussi, et que le volume de M. Fouillée est un bel ouvrage.

Emile FAGUET.

# NOUVELLES

---

## I. — SOUSCRIPTION CHARLES SAURIA

### Monument à élever à Saint-Lothain (Jura)

#### A L'INVENTEUR DES ALLUMETTES CHIMIQUES

*Président du Comité* : M. le D<sup>r</sup> PACTET, conseiller général.

*Vice-Présidents* : MM. Georges TROUILLOT, député du Jura; Victor POUPIN, député du Jura; Général GRÉVY, sénateur du Jura; Pierre LAFFITTE, professeur au Collège de France.

*Secrétaires* : MM. BLONDEAU, juge d'instruction au tribunal de Vesoul; FRIANT, directeur de l'école de laiterie de Poligny; Noël AMAUDRU, homme de lettres, 8, rue de Condé, Paris; AIMÉ, instituteur à Bersaillin.

*Trésorier* : M. PIDOUX, vice-président du conseil général, directeur du Comptoir d'Escompte à Dôle.

*Membres du Comité* : MM. LELIÈVRE, sénateur du Jura; THUREL, sénateur du Jura; J. BOURGEOIS, député du Jura; VUILLON, député; VINCENT, président de l'Association des Pharmaciens du Jura à Arbois; le D<sup>r</sup> ROBINET, sous-bibliothécaire à Carnavalet, Paris; Isidore FINANCE, chef de section à l'Office du Travail; KEUFER, membre du Conseil supérieur du Travail; le D<sup>r</sup> LIGIER, conseiller général; RENAUD, maire de Dôle; GUILLOT, maire de Passenans; PUFFENEY, conservateur du musée et de la bibliothèque de Dôle; de MORÉAL, juge au tribunal de Besançon; de MASQUARD, viticulteur; BUGAUD, notaire à Sellières; PIERREDON, employé; CERNESSE, ancien chef de gare, trésorier de la fromagerie de Saint-Lothain, etc.

« Paris vient de donner le nom de CHARLES SAURIA à l'une de ses nouvelles rues et Dôle se dispose à suivre son exemple. Philosophe, médecin, agronome, littérateur, cet homme de bien méritait assurément d'être tiré de l'obscurité où se réfugiait sa modestie. Mais son principal titre est une création, simple comme tout ce qui est grand et utile, populaire entre toutes : l'invention des allumettes chimiques.

« Vers la fin de 1830, c'est-à-dire trois ans au moins avant que des contrefacteurs autrichiens et anglais eussent mis dans la circulation commerciale la combinaison du soufre et du phosphore, M. Nicolet, professeur de chimie au collège de l'Arc, à Dôle (Jura), faisait, de-

vant les élèves de son cours, une expérience sur une poudre détonante. Il avait obtenu le résultat attendu : une détonation en frappant avec un pilon sur un point de la surface intérieure d'un mortier, enduite de chlorate de potasse et de soufre mélangés. Ce fait impressionna vivement un de ses élèves qui se fit ce raisonnement : « Si l'on pouvait ajouter du phosphore à ce mélange détonant, on pourrait peut-être obtenir des allumettes s'enflammant par simple friction et le vieux briquet serait supprimé du coup. » L'écolier qui venait de concevoir cette merveilleuse application de la chimie à nos usages journaliers s'appelait CHARLES SAURIA.

« 150 de ses condisciples l'ont vu tremper les longues bûchettes soufrées aux deux bouts dont on se servait alors dans du chlorate de potasse légèrement chauffé et les frotter sur le mur à l'endroit où il avait l'habitude d'essayer ses allumettes. Grâce à ces frictions répétées et à la couche de phosphore qui recouvrait le plâtre, les allumettes s'enflammèrent. Le problème était résolu. Sauria, suivant le mot naïf d'un élève, avait trouvé « les allumettes qui brûlent toutes seules. »

« Dès janvier 1831, M. Puffeney, aujourd'hui conservateur du musée et de la bibliothèque de Dôle, et le docteur Bon fabriquaient des allumettes chimiques pour leur usage personnel.

« Quelque temps après, M. Nicolet fit un voyage d'études en Allemagne et, en visitant les usines autrichiennes, il se laissa aller à parler de la découverte de son élève Sauria. Voilà qui explique de la façon la plus naturelle l'apparition des allumettes chimiques, dites allemandes, et les prétentions de l'Autriche à célébrer le soi-disant cinquantenaire de l'invention, — de l'exploitation, aurait-on dû dire équitablement, — des allumettes chimiques.

« Il est temps de restituer à chacun sa part de mérite.

« Un modeste monument, sur le territoire de cette petite commune de Saint-Lothain où Charles Sauria repose à côté de son père, le vieux général de la Révolution, est bien dû à ce serviteur de la science pratique et de l'Humanité. »

*On peut adresser les souscriptions à M. Rousseau, 40, rue Monsieur-le-Prince.*

---

## II. — COLLÈGE LIBRE DES SCIENCES SOCIALES

8, rue de Tournon, à Paris.

### Direction.

D<sup>r</sup> E. DELBET, député de Seine-et-Marne, directeur. — DICK MAY, secrétaire général.

Les cours ouvriront le lundi 9 novembre 1896.

LA SOCIOLOGIE D'APRÈS AUGUSTE COMTE par le Dr E. DELBET. — Le cours de cette année continuera et complétera le précédent. — Le professeur exposera les lois générales de l'évolution humaine. — Lois du mouvement intellectuel et social. — Théorie positive du passé : Fétichisme, Polythéisme, Monothéisme et Sociétés correspondantes. — Evolution spéciale à l'Occident. Données générales de la politique positive (le vendredi à 5 h. 1/2, du 9 novembre au 25 janvier).

### Questions ouvrières.

M. KEUFER, ouvrier typographe, membre du Conseil supérieur du Travail.

#### *De l'organisation ouvrière en France.*

De la situation des travailleurs en présence de l'évolution industrielle moderne. — Origine des Syndicats; leurs attributions. — Union de Syndicats. Bourses du Travail. Mode d'action normale de ces diverses organisations (présent et avenir). Rôle des adhérents et des administrateurs (le lundi à 5 h. 1/2, du 25 janvier au 11 avril).

---

*Le Propriétaire, Gérant responsable : P. LAFFITTE.*

---

# INTRODUCTION

A

## L'APPRÉCIATION DES GRANDS TYPES DU CATHOLICISME

---

Je publie la suite des *Grands Types de l'Humanité*. Mais cette suite constitue à elle seule un ouvrage vraiment distinct, quoique solidaire de ceux qui précèdent et de ceux qui suivront. Il s'agit de l'appréciation de l'évolution catholique depuis sa fondation jusqu'à sa digne décadence. Pendant cette période finale, qui peut se prolonger longtemps et doit même le faire jusqu'à l'avènement suffisamment prépondérant du Positivisme, le Catholicisme peut rendre et rendra certainement des services considérables, en posant le problème continu d'un culte et d'une culture morale systématiquement organisés.

En France, l'avènement définitif de la République a mis le Catholicisme et toutes les doctrines théologiques en dehors de l'organisation officielle, politique et sociale, malgré la rémunération que l'Etat applique, comme continuation empirique du passé, à un certain nombre de ces doctrines : *Dieu désormais n'est plus que d'ordre privé ; il n'est plus d'ordre public*. On peut naître, vivre et mourir sans faire aucun acte d'adhésion quelconque à aucune doctrine théologique. C'est là un résultat définitivement acquis. Au fond, les catholiques l'ont accepté. Mais cela n'empêche pas que le culte théologique, pratiqué plus ou moins complètement, d'une manière

plus ou moins intermittente, ne joue un rôle effectif. Dans ces conditions, une appréciation systématique des grands types catholiques est une opération vraiment nécessaire, tout aussi bien pour les adversaires du Catholicisme que pour ses adhérents plus ou moins complets. Pour les premiers, il est utile de leur montrer l'immense rôle du Catholicisme dans le passé et le rôle qu'il peut remplir encore dans le présent. Le Positivisme seul est en état d'accomplir une telle appréciation, qui montrera la suprématie de la science élevée enfin à l'état de religion ; car on n'est définitivement jugé que par ses supérieurs. Quant à l'état purement critique, s'il a pu convenir pendant la lutte, il n'est plus, maintenant que cette lutte est, au fond, terminée, qu'un état arriéré et perturbateur, fort au-dessous des nécessités de la situation actuelle.

Le Catholicisme, obligé de renoncer, depuis l'avènement de la République, à l'appui de l'Etat qu'avait organisé le héros rétrograde de Sainte-Hélène — ce héros de l'avortement et de l'illusion puérile, — le Catholicisme, dis-je, gagnera en dignité et même, dans une certaine mesure, en efficacité, malgré la perte de ses prérogatives officielles, dès qu'il cessera d'être considéré comme un *instrumentum regni*. Ce résultat, on peut le dire, est désormais tout à fait obtenu, car un chef quelconque n'oserait plus maintenant invoquer ni le Dieu juif, ni le Dieu chrétien, ni le Dieu indéterminé de nos déistes, dans aucune cérémonie officielle. Ces croyances sont exclusivement du domaine de la conscience, domaine qui n'est pas même privé, mais simplement personnel.

Le Positivisme, comme le verra le lecteur attentif, offre au Catholicisme, *sous la présidence positiviste*, un rôle éminent et considérable encore, comme présentant le type, élaboré par tant de siècles, d'un culte et d'une culture morale systématiques. La solution positiviste peut, en outre, offrir une direction à l'activité des esprits ardents du monde catholique, en évitant pour beaucoup d'entre eux la déviation anarchique, toujours virtuellement contenue dans leurs déclamations fâcheuses contre la richesse et le savoir, double base de toute civilisation. Ces déviations, dont on pourrait trouver tant de types dans l'Evangile même, ont été jusqu'ici



empêchées par l'action constante du sacerdoce romain qui a corrigé les abus de la doctrine, en réduisant ces déclamations à n'être qu'une excitation affective, leur faisant ainsi perdre toute dangereuse acuité.

Je crois donc que la publication de mon travail a une utilité politique actuelle, outre son utilité historique. J'espère ainsi constituer un terrain commun où les esprits actifs et émancipés trouveront une base d'entente avec les catholiques sincères et suffisamment intelligents.

J'espère même que ce travail pourra réagir sur le grand nombre de femmes chrétiennes, que n'a pas trop altérées un fanatisme devenu exceptionnel. Beaucoup d'entre elles sont certainement assez intelligentes pour comprendre la haute utilité d'une appréciation historique qui met en pleine lumière, en même temps que l'importance capitale d'une culture systématique du sentiment, le rôle essentiel qui, sous ce rapport, incombe naturellement aux femmes, indépendamment de toute croyance particulière.<sup>1</sup> Elles compromettent ce rôle en le liant trop étroitement aux rites du culte catholique; car la dédaigneuse tolérance des émancipés à l'égard de leurs pratiques cultuelles les place vis-à-vis d'eux dans une situation d'infériorité mentale qui nuit à leur légitime influence comme mères, comme épouses, comme filles et comme amies. Il y a là, certainement, pour elles un effort intellectuel nécessaire, dont mon appréciation positive du Catholicisme peut être l'occasion et le point de départ. Outre le sentiment d'un devoir rempli, elles trouveront à cet effort une heureuse compensation, car elles acquerront ainsi plus de considération et, par suite, une meilleure influence. Si la situation persistait, il finirait par y avoir au fond deux mondes, celui des femmes et celui des hommes; les femmes étant regardées comme irrévocablement incapables de s'élever à une morale vraiment positive. Beaucoup d'esprits accepteraient la célèbre formule de Lagrange : « Le cerveau de la femme est une éponge à préjugés », formule un peu exagérée et qui a l'inconvénient de ne pas faire assez la part des préjugés dans l'organisation morale de notre espèce; car, au fond, tous les principes de la vie pratique doivent devenir des préjugés,

pourvu qu'ils soient susceptibles d'une démonstration, qu'il est bon de donner dans l'enseignement.

Ce défaut d'entente entre les deux sexes, s'il devait persister et s'accroître, serait profondément désastreux pour les intérêts de la civilisation finale de notre espèce. Le Positivisme seul, je le crois, peut réaliser l'indispensable union des deux sexes pour la solution du problème de l'organisation morale, intimement lié désormais à celui de notre plus haute évolution mentale et à celui de notre organisation pratique.

Je serais heureux, en outre, si mon travail contribuait à développer, dans un cas décisif, la prépondérance du point de vue historique, condition de l'avènement d'une sociologie positive, complément capital de l'évolution scientifique. C'est dans la constitution des phénomènes sociaux à l'état positif que consiste le rôle essentiel d'Auguste Comte, beaucoup plus même que dans l'avènement d'une morale positive.

C'est là le nœud de notre régénération mentale et sociale. Concevoir les phénomènes sociaux comme assujettis à des lois nécessaires d'ordre et de succession, voilà le grand problème de notre siècle, posé et résolu par Auguste Comte dans ses bases essentielles, et à la propagation duquel j'ai consacré ce que je pouvais avoir d'activité, d'intelligence et de dévouement.

Pierre LAFFITTE.

Paris, le 17 novembre 1896 (14 Frédéric 108).

---

## LES CONDITIONS SOCIOLOGIQUES

DE LA

# PRODUCTION ESTHÉTIQUE <sup>(1)</sup>

---

MESSIEURS,

Si l'on examine la Science dans son histoire et dans son évolution, si on la considère jusque dans ses origines, à ces âges lointains où l'Humanité primitive s'essayait à la réflexion et où la pensée balbutiait à peine, on est dans la nécessité de constater, à mesure que les siècles se succèdent et que les civilisations s'ajoutent, une intégration lente et successive des diverses sciences en un système positif et fixé, l'on voit les différents domaines s'incorporer tour à tour dans un ensemble logique de spéculations supérieures, qui, écartant les formes intermédiaires, théologiques ou métaphysiques, construisent la forteresse inexpugnable de l'esprit, première base d'une coordination régulière dans l'activité future, début d'une ère nouvelle dans l'histoire de l'Humanité.

Avant que Bichat ne construisit au début de ce siècle l'ensemble de la biologie positive, toute une série de phénomènes relatifs à l'activité mentale de l'homme et même à son activité plus spécialement physiologique appartenait encore à la métaphysique. Ce fut l'œuvre de Gall, la fondation de la physio-psychologie et la détermination des fonctions élémentaires du cerveau qui marquèrent la prise de possession de ce domaine par l'esprit positif. Comte vint enfin, qui coordonna

(1) Leçon d'ouverture du *Cours d'Esthétique positive* professé à l'Université nouvelle de Bruxelles, par M. Raphaël Petrucci (4 novembre 1896.

dans un ensemble de philosophie positive les diverses manifestations de l'esprit humain, soit dans son activité scientifique, soit dans son activité sociale; il créait ainsi la science nouvelle, la jeune pensée à qui était dû d'édifier pour l'avenir un système normal et réfléchi à la place d'un système totalement empirique.

L'Art échappa, et dans son ensemble échappe encore à cette immense systématisation. Auguste Comte en avait posé les principes généraux, mais la réalisation effective n'en a pas encore été tentée, et si l'on veut bien considérer les origines de l'Art, ses moyens, les conditions de sa production et aussi cet antagonisme en apparence inconciliable entre l'esprit du savant et celui de l'artiste, on verra que rien n'était plus logique et que les lois de la manifestation artistique devaient les dernières rester dans l'obscurité et dans l'inconscience. Tant que la physio-psychologie ne pouvait apporter un système logique qui déterminât le mécanisme des émotions chez l'homme, tant que l'histoire de l'Humanité, les recherches anthropologiques et ethnologiques ne furent pas venues apporter les éléments de ce que l'on pourrait appeler une « Psychologie Comparée » les phénomènes qui servent de base à l'Esthétique devaient demeurer inexpliqués. Dans la réalisation, le génie de certains hommes pouvait s'élever à la connaissance implicite de ces lois, ou même les entrevoir confusément, ils pouvaient arriver à l'expression sublime d'un Phidias ou d'un Léonard de Vinci, mais tout cela échappe encore à l'analyse de l'esprit scientifique, aucun phénomène ne se trouvait déterminé et celui qui en abordait l'explication ne pouvait donner qu'une série d'hypothèses quelquefois ingénieuses, mais auxquelles manquait la constatation des faits, et, par conséquent, la base suffisante.

L'anthropologie, l'ethnologie comparée, la physio-psychologie, et les sciences de l'histoire, permettent aujourd'hui d'aborder l'étude de ce grand problème. Sans doute, les matériaux se trouvent dispersés et un grand effort sera nécessaire pour arriver à coordonner tous ces éléments et à les incorporer dans une nouvelle science, il faudra se résigner à ne donner qu'une esquisse incomplète de ce fragment de

Philosophie générale, mais, telle quelle, la préparation est suffisante pour pousser à l'élaboration de ce travail et pour autoriser une tentative dans ce sens.

Les écoles académiques résistent encore mais faiblement, elles se refusent à accepter le nouveau point de vue que leur apporte l'évolution de la Science : lorsqu'on a un peu d'ingéniosité d'esprit, et la libre disposition de mots creux et sonores, il est facile de construire des théories métaphysiques. La nébulosité qui y règne, cet aspect de spéculations abordables seulement pour les initiés donne je ne sais quel air de mystère qui paraît fort scientifique et qui impose le silence à ceux qui timidement acceptent le décret qui consacre leur ignorance. Je ne voudrais point vous rappeler les idées de Victor Cousin, sa théorie soi-disant platonicienne, ni même ses définitions étranges, véritables exemples de jonglerie littéraire. « L'Art, c'est le Beau, disait-il, l'Art, c'est le Vrai, l'Art, c'est le Bien ». Le Beau, le Vrai et le Bien formaient trois entités, sorte de trinité étrange où l'un s'expliquait par l'autre. Si l'on avait à donner la définition du Beau, c'était le Vrai et le Bien ; la définition du Bien, c'était le Vrai et le Beau, la définition du Vrai, c'était le Beau et le Bien. Les mutuels déplacements de ces trois entités suffisaient à tout expliquer.

Nous verrons plus tard quelles relations l'Art peut avoir avec le Beau ou le Vrai ou le Bien, mais nous accepterons modestement les leçons de la nature, l'enseignement de l'expérience et de l'observation. Les traditions de nos ancêtres lointains, leurs mauvais outils de pierre, l'étude de leur psychologie primitive seront pour nous des documents ; les peuplades inférieures qui perpétuent encore sur la Terre l'histoire douloureuse de l'Humanité nous fourniront leurs mœurs, leurs coutumes et leurs usages ; les civilisations passées nous apporteront leurs œuvres, et nous verrons revivre à travers la grande évolution des âges la longue et tumultueuse succession des ancêtres. Ils nous indiqueront la bienfaisante tradition de l'éternelle solidarité, de la fraternelle dépendance entre tous les hommes, et je vois je ne sais quel aspect de grandiose noblesse intervenir ici dans l'observation scienti-

fique; je vois la grande âme des ancêtres revivre et palpiter dans notre cœur; je vois l'évocation de leurs longues luttes, de leurs développements si péniblement acquis nous donner la clef de cette expression sublime, l'Art, et nous le montrer comme la langue universelle des petits et des humbles, aussi bien que des raffinés et des puissants. La Science positive, loin de nous apporter la stérilité métaphysique, va nous rendre vivante, au contraire, l'universelle parenté des êtres et dans une étude si spéciale nous rappeler à chaque instant les plus nobles de nos devoirs sociaux.

Et qu'il me soit permis, avant d'entrer dans la matière même de ce cours, de remercier ici les hommes aussi savants que pleins de tolérance qui dirigent votre Université nouvelle. Les nobles préoccupations qui président à vos programmes, cette tentative de constituer une jeunesse d'éducation encyclopédique qui entrera dans la vie sociale avec la préoccupation des importants problèmes qui se posent à ce moment de l'histoire, en faisaient certes les plus ouverts et les mieux disposés à m'accorder la cordiale hospitalité que je reçois ici. Je les remercie de leur accueil et je vous remercie de votre attention.

Je viens de vous dire, Messieurs, que l'Art échappa et échappe encore à l'immense systématisation positive, je vous ai dit aussi que rien n'était plus logique, je vais justifier cette affirmation.

D'une part, la Physio-psychologie, les lois et le mécanisme des émotions étaient nécessaires à la constitution d'une Esthétique positive, c'était la base particulière, celle qui rattachait les manifestations ou les impressions intellectuelles à l'organisme individuel. Mais nous sommes ici dans un domaine déjà restreint, il existe un point de vue plus général encore, c'est le point de vue sociologique. Tant que l'Art ne pouvait être conçu comme une fonction sociologique, et même tant que la coordination des diverses fonctions n'était pas établie dans cet important domaine du savoir positif, une Esthétique qui ne fut pas métaphysique était encore impossible. Sans doute, à travers toute l'évolution humaine, l'Art fut toujours une fonction sociologique, et à certaines époques,

dans certaines civilisations, ce fait fut si profondément senti que la connaissance théorique de la loi n'eût guère apporté de perfectionnement dans l'application qui en était faite. Mais ce n'était qu'un système empirique, une notion confuse et implicite que le moindre trouble, la moindre secousse suffisait à obscurcir complètement, la tradition se perdait pour être plus tard laborieusement recherchée et rétablie. L'Esthétique resta donc jusqu'à nos jours un domaine isolé de la spéculation métaphysique, et, malgré quelques efforts, comme ceux de Diderot et de Barthez, resta considérée comme un domaine où la science n'avait rien à voir, qui appartenait directement au sentiment et à l'imagination, Paradis terrestre, Terre sacrée d'où la démonstration impitoyable était rigoureusement bannie. L'état peu exploré de ce domaine va nous obliger à considérer l'Esthétique dans ses relations générales, avec les ensembles scientifiques dont elle dépend, et ici je me permets d'ouvrir une parenthèse sur le mot Esthétique et sur sa définition.

Si nous voulons considérer l'Esthétique dans sa généralité, deux points de vue s'imposent, et il importe de les séparer.

Lorsque l'on veut construire une science relative à un certain domaine de la réalité, il faut dégager des faits tous les systèmes de relations que l'on peut établir. Ces relations dégagées de l'objet réel et par conséquent abstraites se révèlent comme groupées elles-mêmes suivant diverses classifications et divers principes dont l'expression constitue la loi. A rigoureusement parler, l'Esthétique proprement dite n'est autre chose que la théorie des lois générales et particulières, et le classement des observations dont le groupement logique constitue le domaine artistique.

Mais si nous nous restreignons à ce point de vue, nous nous renfermons dans un domaine d'où nous excluons les relations extérieures, les supposant connues. Si l'on veut bien réfléchir et rechercher ses sources de production, on verra que l'Esthétique suppose la connaissance de la nature et de l'homme, et que ses relations les plus immédiates, ses origines les plus récentes sont non pas dans l'homme considéré individuellement, mais dans tout l'ensemble d'actions et de réactions hu-

maines, dans toute la série des phénomènes organiques et inorganiques qui forment la base première de la Sociologie.

Il faudra, par conséquent, établir comme introduction générale un premier cadre où nous étudierons ces origines premières, elles nous permettront, lorsque nous considérerons l'Esthétique proprement dite, d'avoir toujours présent le point de vue de l'ensemble même au moment le plus spécialisé et dans l'étude la plus particulière. Nous allons donc étudier aujourd'hui les **CONDITIONS SOCIOLOGIQUES DE LA PRODUCTION ESTHÉTIQUE**.

Et d'abord, avant de considérer le point de vue historique, une digression devient nécessaire. Puisque nous considérons l'Art comme une fonction sociologique, il devient nécessaire de considérer cette fonction non pas isolément, mais dans l'ensemble auquel elle appartient, dans sa dépendance avec les autres fonctions de cet ensemble, dans l'activité et le développement harmonique de toutes ces fonctions. Le problème devient très vaste, et nous voici arrivés à considérer la Sociologie comme une introduction nécessaire à l'Esthétique. Cette constatation a de quoi effrayer, aussi n'abuserai-je pas de votre attention jusqu'à vous imposer plusieurs années d'interminables conférences, je n'ai qu'à m'en rapporter aux savants travaux de vos maîtres qui, bien mieux que je ne saurais le faire, vous ont préparés à ces nobles études. Un coup d'œil général sur la Sociologie sera cependant nécessaire, et nous allons aborder cette Science surtout au point de vue de la classification des fonctions.

Il est impossible de considérer l'homme indépendamment du milieu social; les actions et les réactions de l'un sur l'autre ont été si nombreuses, si complexes, que cet organisme abstrait : la Société, a eu la plus grande influence même sur les transformations organiques de l'homme. Celui-ci, à son tour, a tellement agi sur la constitution de l'organisme social et sur son évolution qu'il en a façonné les fonctions à l'usage des siennes propres. Certes, si l'on prend l'homme au sortir de la bestialité, alors qu'il ne représentait qu'un type indécis, flottant entre les destinées futures et l'écrasante influence des hérédités animales, ballotté entre l'une et l'autre, ici triom-



phant, là succombant, on pourrait à la rigueur le concevoir individuellement, sans aucune influence sociologique même des plus rudimentaires. Et cependant ce point de vue ne peut être permis que si on l'accepte comme nécessité d'étude, abstraction qui ne correspond qu'imparfaitement à l'évolution réelle, faite seulement pour classer nos raisonnements et introduire de l'ordre dans notre esprit. Car les origines du groupement en Société sont antérieures à l'homme, certains animaux présentent même l'organisation en tribu soumise à un chef, généralement le vieillard, celui dont l'expérience accumulée, la rudimentaire observation de l'esprit des bêtes ont fait le plus propre à la défense et à la conservation des individus. Avec sa lente transformation, l'homme a reçu, en même temps que les hérédités animales, les tendances à la constitution d'un organisme social, on ne peut l'en séparer et il faut le considérer comme l'élément anatomique, la monade de cet organisme.

Cette intime connexion, cette dépendance si rigoureuse de la Société et de l'Homme a eu pour résultat de constituer, par une loi d'analogie bien naturelle et bien normale, des fonctions dans l'organisme collectif, non pas semblables, mais analogues et comparables aux fonctions organiques de l'homme lui-même. Sans doute, il serait absurde de prétendre introduire dans la Sociologie les lois biologiques et de les y appliquer strictement. Avec la constitution d'un domaine nouveau, de nouvelles relations plus complexes, plus étendues, apparaissent et par conséquent aussi de nouvelles lois. Certaines des lois primitives disparaissent, d'autres subissent une transformation, d'autres se constituent. Cependant une analogie générale reste fermement établie. Si donc nous voulons entrer dans la classification des fonctions sociologiques, nous verrons se déterminer des ensembles généraux analogues à ceux de la Biologie ; je dis analogues et non pas semblables.

Un premier ensemble s'établit d'abord, le plus nécessaire, le plus élémentaire, celui qui apparaît dès l'origine de la vie et par lequel la vie se perpétue, c'est la nutrition. L'organisme social, basé sur le groupement d'êtres animaux n'é-

chappe pas à cette nécessité, les conditions économiques d'abord primitives et simples, puis évoluées et complexes viennent s'y classer. Les conditions de subsistance primitive, la chasse ou la pêche, s'y incorporent nettement à l'origine. Plus tard évoluées et complexes elles empiètent sur le domaine opposé, celui de la relation, jusqu'à se soumettre difficilement à une classification précise. Cependant, comme les classifications sont faites beaucoup plutôt pour introduire de l'ordre dans l'esprit et pour hiérarchiser la connaissance, le résultat est toujours atteint. Si l'on voulait considérer les types de classification de même que certains naturalistes opposés au transformisme considèrent aujourd'hui l'espèce, on se perdrait pour la Sociologie dans les divagations les plus stériles.

Le second ensemble, je viens de l'indiquer plus haut, c'est celui de la relation. A l'origine, ce sont les gestes et la mimique primitive, le cri, puis le langage articulé, les premiers essais de l'écriture, enfin les diverses formes de l'expression par lesquelles, nous le verrons plus loin, l'Art débute confondu avec les sciences et avec toutes les formes d'activité mentale; il ne se différencie et ne se spécialise que plus tard. C'est donc ici, dans les fonctions de relations, que viendra se placer l'Art, jusqu'à présent sa fonction sociologique est donc simplement une fonction de relation. Nous allons voir tout à l'heure comment elle évolue et se transforme. A mesure que s'étend l'évolution de l'organisme social, ces fonctions de relation sont de plus en plus envahies par l'extension de fonctions primitivement consacrées à la subsistance. La guerre, par exemple, évolution de la chasse, de la conquête de l'aliment nécessaire et de la défense, devient dans les Sociétés évoluées un facteur très puissant de relation. C'est ainsi que des ensembles bien distincts à l'origine viennent plus tard se pénétrer mutuellement dans une complexité croissante et de plus en plus étendue.

Mais si l'organisme animal se bornait à ses fonctions de nutrition et de relation, l'espèce disparaîtrait à la mort de l'individu, un troisième ensemble de fonctions s'établit dans le monde animal, c'est la reproduction par laquelle se per-

pétue l'espèce. C'est ici que l'analogie avec l'organisme social devient plus lointaine, et les causes en sont très apparentes.

En effet, les fonctions qui, pour l'organisme social, présentent des analogies avec les fonctions animales de reproduction se confondent à l'origine avec les fonctions de reproduction de chaque élément humain. L'organisme social dans son aspect primitif, la Tribu, se reproduit simplement parce que ses éléments composants, les hommes, se reproduisent. Ce n'est qu'avec la lente évolution de la pensée et avec le développement des conditions économiques qui en sont la première base que des fonctions sociales se constituent dans ce domaine, elles y deviennent d'une complexité extrême et n'offrent plus qu'une lointaine analogie avec les fonctions animales.

Ici, l'organisme social montre sa supériorité sur l'organisme animal. Celui-ci ne se reproduit que pour disparaître et ses rejetons disparaissent à leur tour. C'est seulement dans la constitution de l'espèce que de nouvelles conditions interviennent. Là des perfectionnements s'acquièrent lentement dans la succession des individus, ils se transmettent des uns aux autres en s'y fixant définitivement. Il y a dans l'élaboration de l'espèce une acquisition continuelle de caractères nouveaux et de qualités meilleures, une véritable capitalisation de résultats acquis. Cette action est lente et pénible, elle ne peut s'évaluer qu'à travers un nombre incalculable d'années, à travers une longue série de siècles, elle forme cependant l'intermédiaire entre le type des fonctions animales et celui des fonctions sociologiques de reproduction. Car l'organisme social a supprimé la mort, il opère par CAPITALISATION SUCCESSIVE ET PAR PRODUCTION INDÉFINIE, et il opère cette capitalisation et cette production avec une telle intensité que ce sont là des phénomènes essentiels de l'activité sociologique et qu'ils représentent la seule cause de l'évolution rapide de l'homme. Bien plus, ils constituent le domaine que nous nous plaçons à considérer comme le plus élevé, ils constituent nos industries, nos sciences et nos arts, ils sont la première base de la reproduction et du perfectionnement sociologique.

Si l'organisme social se bornait à se reproduire par la simple reproduction des éléments qui le composent, il serait immobile. La société s'arrêterait dans une forme déterminée, primitive ou complexe, et laisserait s'accumuler les siècles sans qu'aucun facteur de perfectionnement ou d'évolution vint l'ébranler. Des exemples de ce phénomène nous sont offerts par les civilisations théocratiques où la coordination des divers éléments fut complète. Une fonction sociologique était désignée à chaque caste, représentant une sorte de système voué à un labeur déterminé, et la suprématie complète des prêtres, donnant un caractère religieux à chaque particularité du fonctionnement général, immobilisait l'ensemble pour des siècles, dans une série d'actes toujours fidèlement répétés. Tant qu'elles sont restées isolées, ces civilisations ont présenté l'aspect de constructions éternelles. Pourtant dès que des conditions quelconques les ont mises aux prises avec des éléments quelquefois plus barbares, mais apportant avec eux l'impétueuse activité des forces militaires, elles se sont écroulées au premier choc. Ces civilisations vivaient des intérêts d'un capital acquis sans agir vers de nouvelles capitalisations. Au contraire, lorsque les diverses activités sociologiques restent en jeu, sans que la prédominance soit établie d'une façon durable pour l'une d'entre elles, l'organisme social non seulement vit des intérêts de la capitalisation déjà faite, mais encore la partie élevée de la société travaille continuellement à conquérir de nouveaux éléments et à les incorporer dans la richesse sociale déjà acquise. Alors, l'accumulation continue des observations scientifiques, des lois établies, et des hypothèses nouvelles, les conquêtes empiriques ou raisonnées de l'Industrie et des Sciences, les œuvres de l'Art, tout cet ensemble enfin crée une fonction de reproduction et de progression perpétuelle, une amélioration continue de la vue individuelle et sociale, une évolution des mœurs, des esprits et des lois qui, renouvelant continuellement l'organisme social, le mènent par de continues transformations vers une perfection de plus en plus grande, un ordre de plus en plus stable, et un progrès de plus en plus fécond. Cette action progressive ne s'arrête pas d'ailleurs au seul groupe qui,

dans l'ensemble sociologique, en est le principal facteur, mais elle s'étend à toutes les classes et à tous les milieux, en quantité comme en intensité. Plus les richesses du capital social s'accumulent, plus elles deviennent supérieures, et plus ceux qui en jouissent, matériellement et moralement, sont nombreux. De sorte que les classes élevées tendent à disparaître et que l'incorporation d'un plus grand nombre de cerveaux à l'action commune tend à précipiter encore l'évolution poursuivie en multipliant les découvertes et en rendant leur application plus facile. Un rapide coup d'œil jeté sur l'histoire suffit à prouver l'exactitude de cette loi. Alors que dans la civilisation grecque ou romaine quelques hommes seulement participaient aux jouissances du capital social, et que le plus grand nombre, réduit à l'esclavage et méprisé, devenait une simple machine ou un instrument de plaisir, nous pouvons voir aujourd'hui presque toutes les classes participant dans une large mesure aux biens acquis par l'œuvre commune, et si des souffrances et des plaies sociales existent encore, il n'est pas un homme de cœur, même parmi les favoris du sort, qui n'ait le sincère désir d'une formule plus normale et plus humaine, d'une amélioration de la vie, et d'une plus grande réalisation du bonheur.

Jusqu'ici l'Art était simplement une expression et paraissait appartenir exclusivement aux fonctions de relation. On voit maintenant quelle haute importance il peut prendre dans l'ensemble des fonctions sociologiques. L'Art comme la Science est le fruit direct de la capitalisation. Lorsque l'homme primitif, trop exclusivement occupé par la conquête de la subsistance, épuisait dans la chasse toute l'activité de son corps, entre les moments de lutte et les moments d'un repos si durement gagné, il n'y avait place pour aucune méditation, pour aucun effort de pensée. Cette activité supérieure n'est devenue possible que lorsque la conquête facile d'une proie suffisait à créer pour lui et pour sa famille une certaine quantité capitalisée d'aliments. C'était alors le loisir, avant que le repos ne fût nécessaire, et avant que l'activité organique n'eût été dépensée. Or l'homme, qui venait d'échapper aux luttes continuelles de l'animal, avait accumulé dans son

organisme une puissance d'activité qui, sans nécessiter aucun effort mental, simplement par influence réflexe, sollicitait un débouché quelconque pour se dépenser. C'est alors que la méditation devint possible, c'est alors que la mémoire put associer différents faits, c'est alors que l'homme put observer autour de lui, s'essayer à la réflexion et à la pensée, c'est alors aussi que l'activité physique exubérante et toujours dominante donnait naissance au jeu par la reproduction et l'imitation de scènes réelles de combats ou de chasses. A ce moment de l'histoire de l'homme les facultés mentales apparaissent dans leur aspect de développement supérieur, elles se présentent confuses et maladroitement, entremêlées et générales, sans aucune différenciation précise. L'Industrie, la Science, la Philosophie, l'Art naissent ensemble. Leurs origines sont communes et ces divers domaines ne se différencient que plus tard. Lorsque nous considérerons les origines de l'Art, nous développerons cette conception dans ses plus grandes lignes. Il nous suffit d'observer ici combien, à quel degré intense les diverses manifestations mentales sont liées à des conditions économiques qui sont essentiellement dépendantes de la Sociologie. L'Economie sociale et l'Economie intellectuelle se pénètrent et agissent dans le même sens pour préparer la réalisation des destinées humaines. Elles deviennent la base essentielle de la capitalisation des éléments conquis au sein du groupe humain. Et qui ne voit que là est le germe de développement des civilisations les plus puissantes. L'acquisition des moyens d'expression, la fixation des signes tant sociaux que matériels et gravés, la possession, au moyen de ces signes, de certains phénomènes déterminés, de plus la possibilité d'accumuler la masse innombrable des observations de chaque individu, la faculté de construire ainsi la base sur laquelle s'élèvera peu à peu le vaste édifice des civilisations évoluées, voilà toutes les conséquences de ce fait si simple en apparence : la satisfaction du ventre et la liberté de l'esprit.

L'activité humaine est maintenant en marche, la ligne de démarcation entre la série animale et l'homme est maintenant tracée, nous entrons dans l'histoire de l'Humanité et nous

quittons le monde des bêtes. Peu à peu de nouvelles conquêtes s'établissent et dans cette activité générale où tous les efforts, toutes les facultés furent employées, qui pourrait préciser le rôle qu'a joué l'Art ou la Science, ou telle autre de ces formes d'activité complexes et évoluées qui nous sont aujourd'hui devenues familières ? Lorsque l'homme arriva à concevoir l'outil de pierre, pour qu'il parvint à associer l'idée de tranchant de la pierre avec le fait d'un silex éclaté, pour qu'il parvint à reconnaître entre toutes les pierres propres à ce but, pour qu'il imitât la nature en taillant lui-même la pierre, et pour qu'il imitât, en la taillant, la pointe d'épieu durcie au feu dont il usait à l'origine ou l'éclat d'os ou l'arête de poisson qui lui servait pour ses flèches, il lui fallut une aussi forte dose d'abstraction et de transposition des formes que d'observations concrètes et de classement des propriétés physiques. L'Art et la Science étaient alliés dans ces premiers essais de l'Humanité naissante, ils conduisaient à une imitation des formes dans un but tout industriel, à une véritable adaptation des éléments naturels aux besoins de l'homme. Peu à peu et avec le développement des conditions économiques, avec l'extension de plus en plus grande du loisir, avec de plus longues méditations, de nouveaux besoins naissaient. L'homme travailla longuement alors à orner les objets qui servaient à ses besoins mêmes; nous étudierons plus loin ce phénomène en le considérant au point de vue de l'origine de l'Art, si j'y fais allusion ici c'est surtout pour établir une dépendance entre le milieu sociologique et la forme d'Art correspondante. L'Humanité est soumise aux mêmes lois que l'Animalité. Elles les a subies et ne s'en est affranchie qu'en les comprenant mieux et en les réalisant toujours. L'influence du milieu sur les formes animales et sur leur développement fut, à l'origine, aussi intense sur l'homme. Mais la constitution d'un état nouveau, l'évolution qui porta l'homme à conquérir une première et confuse conscience, et à créer un milieu abstrait, fait de sa pensée et de ses passions, fut justement le facteur puissant de ses destinées supérieures. Le milieu sociologique agit sur les créations du cerveau de l'homme d'une manière analogue à celle dont le milieu naturel agit sur l'animal. Les facultés

intellectuelles ne se développèrent nécessairement qu'avec les matériaux qui étaient à leur portée, et si elles arrivèrent à dominer et à régenter plus tard les lois de structure du milieu sociologique, il n'en est pas moins vrai qu'elles furent à l'origine dans une posture de dépendance et non de supériorité. D'ailleurs, le milieu sociologique lui-même a ses origines immédiates dans le milieu naturel. C'est aujourd'hui une chose admise que le milieu géographique ait eu, surtout aux débuts de l'Humanité, une influence énorme sur le développement sociologique. Un milieu de forêts, par exemple, obligeait l'homme à adapter la satisfaction de ses propres besoins aux éléments qui en dehors de lui pouvaient les satisfaire. La forêt lui imposait sa faune et sa flore comme aliments, ses espèces d'animaux diversement armés influaient sur la tactique de la chasse, par suite sur la fabrication des armes et par conséquent aussi sur la guerre de tribu à tribu. Les phénomènes météorologiques spéciaux au milieu imposaient aussi un certain genre de vie, les arbres pouvaient seuls fournir des matériaux à l'homme pour bâtir son abri et une certaine forme architecturale rudimentaire en était la conséquence, la vie de la tribu s'adaptait au milieu et le groupe humain ne pouvait s'y développer que lorsque l'adaptation était devenue complète. A ce moment la forme sociale, les habitudes de l'esprit avaient pris une certaine direction que l'homme ne pourra guère plus abandonner.

Le phénomène prenait des formes différentes suivant les variations du milieu extérieur. Si l'homme, au lieu d'habiter les forêts, se trouvait placé, par des conditions toutes fortuites, des hasards inexplicables comme ceux qui se produiraient à ces époques lointaines dans un pays de montagnes pierreux, où la végétation rare et de petite taille ne pouvait lui fournir des matériaux suffisants, il était amené par la force même des choses à choisir pour abri l'une de ces cavernes nombreuses, véritables demeures de pierre dont souvent des animaux redoutables lui disputaient la propriété. Alors l'homme s'établit dans la caverne, il façonna le rocher pour y vivre, la faune et la flore, étant tout autres, déterminèrent aussi d'autres habitudes de vie, bref, la direction



du développement social s'établissait dans un sens donné.

Ces influences s'étendirent bien au-delà de ce qu'on leur accorde généralement pour domaine, la dépendance qui s'établit entre le développement et les habitudes acquises des organes, d'une part, et le milieu général, sociologique ou géographique, d'autre part, est beaucoup plus intense qu'on ne pourrait le croire au premier abord. Car, quelle que soit l'intensité d'action du facteur intellectuel dans les époques évoluées et déjà historiques, il n'en est pas moins vrai qu'il surgit lui-même comme un produit au milieu de ces activités et de ces influences primitives. Aux origines du développement sociologique, on peut presque exclusivement s'attacher à l'étude des facteurs extérieurs, à l'évaluation des forces naturelles et de leur action sur l'homme, pour arriver à discerner les conditions premières par lesquelles se formulèrent les origines des civilisations. Le facteur intellectuel a là une place bien petite, il est dominé encore par la puissante nature, et cette vacillante lueur, qui vient éclore dans le cerveau de l'homme primitif, est livrée encore à tous les hasards, à toutes les fatalités des phénomènes inconscients et des forces physiques.

Quoi qu'il en soit, le milieu naturel, d'abord, puis le milieu sociologique qui n'apparaît que comme un prolongement du premier, dépendant de lui dans ses origines et dans ses formes les plus simples, arrivent par leur action simultanée à créer chez l'homme des habitudes d'esprit et des habitudes d'organes; la tendance de l'organisme à répéter ses actes sous les mêmes formes et sans changements, la difficulté que l'on éprouve à réagir contre cette tyrannie de l'habitude, devenaient nécessairement des influences puissantes qui déterminaient un certain courant général suivant lequel s'employa l'activité des hommes appartenant à un même groupe. De là des différences profondes, sensibles encore entre certains peuples considérés par masses, de là aussi, au point de vue particulier qui nous occupe, une direction générale et une tendance déterminée dans toutes les formes que pouvait prendre l'activité intellectuelle, et particulièrement pour l'Art.

Nous verrons plus tard à quel point les habitudes organiques et les divers phénomènes qui en dépendent peuvent agir sur la perception des formes et la conception de la beauté. Qu'il nous suffise de constater ici qu'avec des conditions de vie différentes se formaient des habitudes d'esprit et des habitudes d'organes essentiellement différentes. Certains mouvements dans la perception des formes, par exemple, devenaient habituels pour l'œil et ces mouvements étaient différents suivant les milieux. Ceux d'entre vous qui connaissent la montagne savent combien les gens des plaines se trompent lorsqu'ils veulent y évaluer les distances. A vingt pas un homme leur paraît éloigné de 40, et cela parce qu'ils ne sont pas habitués à la comparaison simultanée des masses du paysage et de l'individu, l'œil juge faux parce qu'il juge suivant des habitudes acquises dans un milieu différent.

Si nous supposons deux objets, deux formes, soit naturelles, soit dessinées, la forme agréable sera celle qui demandera une adaptation normale de l'œil. L'œil, dans les mouvements qu'il peut faire pour suivre l'ensemble d'une ligne, est gouverné par des muscles; si cette ligne se présente de telle sorte que l'adaptation de l'organe ait lieu avec facilité, sans brusquerie, par le développement de mouvements musculaires normaux et habituels, il en résultera, dans le sens musculaire une impression agréable qui sera la première cause déterminante d'un sentiment de plaisir. Si, au contraire, l'action musculaire est brusque et heurtée, il se produira une sensation désagréable analogue à celle de la dissonance dans le sens auditif. L'homme primitif habitué à la perception des formes particulières à la forêt, à l'harmonie et aux combinaisons de lignes que présente l'arbre, était d'autant plus agréablement ému par la perception des objets que ceux-ci se rapprochaient dans la combinaison des formes et des lignes de celles qu'il était habitué à percevoir. Il acquerrait en même temps une tendance à les reproduire. De là certaines caractéristiques élémentaires. L'Architecture chinoise, par exemple, où le bois et le bambou sont si apparents comme matériaux usuels, conserve aussi dans ses états les plus évolués et les plus complexes une imitation évidente de leurs

formes. La série des toits qui s'escaladent, la courbure de leurs axes, la façon dont ils se projettent en avant de la surface extérieure du mur, ne font que reproduire des combinaisons de lignes analogues à celles de l'arbre. L'influence du milieu primitif ne s'arrête pas là. Malgré que la mêlée des nombreuses races du continent asiatique rende bien difficile et même impossible de retrouver un type pur, il n'en est pas moins vrai que dans l'ensemble des arts d'Asie on peut constater d'une manière générale une complication savante et recherchée des structures les plus simples, l'invention de monstres étranges, un esprit fantasque et une imagination déréglée. Nous sommes loin du goût, de la mesure, de l'esprit d'équilibre et de la netteté des formes propres aux occidentaux. Ces deux apparences d'Art ne sont pas des phénomènes isolés; l'esprit humain, les conditions sociologiques elles-mêmes présentent des différences correspondantes. De même qu'il y a eu des habitudes acquises dans la perception des formes, il y eut aussi des habitudes acquises dans le travail de l'esprit, dans la façon de coordonner les connaissances ou de les acquérir, dans la tendance à aborder certains problèmes plutôt que d'autres. Des formes d'esprit se sont produites, et dans l'activité générale, des différences essentielles se sont établies. Le développement sociologique dans un sens donné tendait à accumuler encore les différenciations, à les faire pénétrer d'une façon plus intense dans l'organisme lui-même, bref, il s'est formé de véritables « RACES SOCIOLOGIQUES » suivant la vigoureuse expression de M. Laffitte. Et de même que ces races sociologiques diffèrent dans leur structure, elles diffèrent aussi dans leurs manifestations et par conséquent dans leur Art.

Ces races sociologiques dépendent donc du milieu primitif, de la direction prise à une époque où l'homme subissait la nature et ne la dominait pas. Cette influence est la première base; mais, par le fait même que l'activité se dirigeait dans un sens donné, l'hérédité venait encore fixer les caractères et les établir d'une façon plus profonde dans l'espèce. Il faut d'ailleurs ne pas perdre de vue que l'influence exclusive du milieu extérieur ne s'exerça ainsi que dans les périodes pri-

mitive. A mesure que les civilisations évoluent, le facteur intellectuel arrive à prendre un rôle de plus en plus accentué. Le milieu sociologique devient le produit direct de l'action de l'homme. Celui-ci domine alors les forces du monde extérieur, il restreint leur influence ; alors que dans les premiers âges c'était l'homme qui devait les subir, ce sont aujourd'hui ces mêmes influences extérieures, qui, modifiées et employées par lui, s'adaptent aux particularités de sa vie. L'importance du facteur intellectuel dans l'évolution sociologique est de plus en plus envahissante, tandis que celle des actions possibles du milieu physique diminue. Ce sont, malgré tout, ces influences premières des forces extérieures qui formulèrent dès l'origine certaines directions dans le développement sociologique. Il est bien difficile aujourd'hui d'étudier ces conditions primitives en dehors d'un domaine de types abstraits, car la mêlée des races, la façon dont elles se sont pénétrées ont tendu à effacer les caractères marquants et à les atténuer. Il faut donc considérer ces problèmes dans de grands ensembles, opposer par exemple les manifestations mentales des Asiatiques à celles des Occidentaux pour pouvoir retrouver les différences essentielles dans les diverses formes de l'esprit. On voit nettement alors comment les Institutions sociales, la façon de concevoir les faits, d'observer les phénomènes, de construire les sciences et les arts forment un tout qui est difficilement séparable, et comment la variation introduite dans l'un de ces éléments se répercute à des degrés divers sur tous les autres. L'observation historique nous rendra ce phénomène plus apparent encore, et vous verrez, à mesure que le milieu sociologique varie et se transforme, l'art varier et se transformer. D'ailleurs l'étude devrait être véritablement plus générale, car ce n'est pas seulement l'art qui varie dans ce cas. Une transformation du milieu sociologique, cela suppose une transformation de la masse humaine elle-même et aussi de l'individu. L'évolution consiste en une modification des habitudes d'esprit individuelles et générales, en une modification organique, par conséquent, qui se répercute sur l'industrie, sur la science, sur la Philosophie et sur l'Art, c'est-à-dire sur toutes les manifestations de l'homme. Le problème est trop vaste

pour que j'ose le traiter à ce point de vue. Qu'il nous suffise ici de ne pas oublier les dépendances mutuelles des diverses manifestations de l'esprit humain au sein du milieu sociologique. Lorsque nous parlerons des modifications de l'Art à travers les différentes époques, il est bien entendu que nous aurons toujours présentes à l'esprit les transformations simultanées de tout l'ensemble.

Pour mettre l'Art en rapport avec le milieu sociologique, il faut prendre celui-ci à un moment où ses diverses fonctions se sont déjà différenciées, l'organisation primitive en classe ou en tribu nous présente encore un désordre intérieur trop considérable pour que l'Art puisse s'y développer en tant qu'expression élevée et collective. Il nous faut arriver jusqu'au moment où une caste, ayant réussi à coordonner et à soumettre les autres, prend une prédominance définitive et construit un nouvel ordre social. Ce sont toujours les prêtres qui ont pris cette influence et les civilisations qui ont été les premières établies dans une série de relations stables ont été des civilisations théocratiques. Il ne pouvait guère en être autrement. Il fallait pour arriver à construire même empiriquement une organisation sociale toute une somme de méditations et d'observations qui demandaient une activité intellectuelle immense et par conséquent un loisir continu. Les sorciers, les devins et les prêtres du premier monde furent les premiers à en jouir, les autres parties de la tribu assumèrent le rôle de les nourrir, tandis qu'ils prirent celui de penser. Ils formaient le premier facteur volontaire d'évolution et d'organisation sociale, et construisirent le premier noyau humain où la pensée, libérée de la servitude du besoin matériel, put se développer dans toute sa plénitude et dans ses diverses activités. C'était déjà une énorme conquête que d'avoir une classe particulièrement vouée au travail intellectuel ; les guerriers, les commerçants, les artisans et les agriculteurs représentèrent les organes d'exécution, tandis que la caste des prêtres renferma tous les penseurs. C'est dire qu'elle seule créa et posséda l'Art. Dans une civilisation théocratique, le rite religieux pénétrant dans toute l'activité sociale, et servant à contenir la tendance au désordre et à la désorganisa-

tion, devinrent des règles immuables, révélées, auxquelles plus rien ne dut être changé. La caste des prêtres pouvait découvrir de nouveaux faits dans la nature, ces secrets nouveaux demeuraient enfermés dans son sein et la forme extérieure de coordination restait toujours la même. L'Art qui n'en était que l'expression fut donc hiératique, soumis à des règles précises dans les moindres détails d'exécution. Il fut d'ailleurs à l'origine l'expression même des traditions religieuses, et ce sont les arts de la forme qui fournirent les premières écritures. En théorisant une forme d'arbre ou de maison ou d'homme, on arrivait à créer les signes même du langage. Mais, d'autre part, les prêtres exécutaient et décrétaient les formes qui devaient représenter les dieux, et souvent ces formes étaient établies de telle sorte que, exprimant des secrets religieux et des doctrines intangibles, il n'était laissé aucune liberté à l'artiste dans l'interprétation des éléments. L'Art hiératique était donc un art immuable où seulement des procédés d'exécution trouvaient leur développement normal. Ce caractère devait singulièrement restreindre son développement. Cependant, dans l'organisation des cérémonies religieuses, dans la série des fêtes consacrées aux divers faits de l'activité collective, il atteignait à sa plus haute expression dans un ensemble donné. Les prêtres égyptiens, par exemple, avaient su faire de la crue du Nil un phénomène religieux qui prenait une portée immense; la fécondation de la terre et la possibilité de la culture dépendaient immédiatement du principe divin; des cérémonies admirables, qui devaient au plus haut point frapper les esprits, consacraient chaque nouvelle activité de la nature; dans chaque manifestation collective de la vie sociale, dans chaque action générale de l'homme et du milieu, l'Art devenait la fonction qui réunissait toutes les activités dans un but supérieur, et exprimait les émotions les plus hautes en même temps qu'il représentait la culture la plus active des sentiments. C'est par là, justement, par l'expression de l'état général d'un milieu et par l'inquiétude, l'esprit de continuelle recherche que l'Art devient une fonction sociologique d'évolution en capitalisant, avec les œuvres, les éléments premiers, la base des progrès

futurs, et en fixant pour toujours l'expression d'une connaissance présente.

C'est par là aussi que les formes d'art peuvent livrer le secret de la constitution psychologique des peuples à travers les divers moments de l'histoire. Parcourez l'histoire du monde, voyez ce qui nous reste des Péruviens ou des Mexicains. Vous trouverez chez eux, dans la structure de leurs édifices, des dispositions très voisines d'un état primitif, tandis que dans leur structure et leur ornementation s'affirment des symptômes évidents de décadence. « Cette sculpture monstrueuse, dit Viollet-le-Duc, monotone dans sa profusion, reproduisant des formes qui n'appartiennent pas au mode de construction adopté, accuse un art corrompu avant son développement. Cela ne se peut expliquer que par la tyrannie d'une caste supérieure sur une population d'artisans et d'artistes avancés déjà dans la pratique des arts mais qui obéissent à des fantaisies aveugles, irréfléchies. Ce qui choque en tout cela, c'est l'absence de raisonnement, on croirait rêver. »

Il y a là un phénomène général que l'on ne retrouve guère dans l'histoire, ces peuples sont passés d'un état primitif à un état de décadence sans transition et sans développement intermédiaires; c'est surtout dans l'ancienne civilisation péruvienne que l'on trouve l'exemple le plus complet de civilisation théocratique, tout fut immobilisé par l'administration et la hiérarchie introduite dans les divers éléments de la nation. Tout est réglé et tout s'arrête. L'organisme social reste fixé dans le fonctionnement pur et simple des éléments acquis, et toutes les fonctions d'évolution comme l'Art, l'esprit philosophique et religieux, les désirs généraux du peuple se trouvent arrêtés dans leur essor et dans leur action. C'est alors que l'on voit vieillir sur place cette systématisation politique. L'Art répété dans les mêmes formes sans variations et sans progrès se dessèche et se meurt, les édifices de pierre simulent la construction de bois, la pierre est taillée sans souci de sa nature, de sa consistance, de ses caractères différentiels, l'ornementation est directement tirée des tissus et de la passementerie pour venir s'appliquer à la sculpture, l'esprit ne s'élève même pas à la connaissance empirique des moyens

d'association des éléments employés. Les autres formes sociales suivent la même pétrification. Les agriculteurs répètent les mêmes procédés de culture, sont liés à la terre et restent agriculteurs pour toujours. Les guerriers de même ne peuvent sortir de leur caste, et répètent indéfiniment le même rôle. Ce caractère d'immobilité de tout en dépit de la nature même se retrouve jusque dans les lois politiques et dans les conditions d'hérédité de la puissance. L'Inca, fils du Soleil et assimilé au Dieu, épouse sa sœur. La lignée se reproduit toujours dans le même sang, et tout est empreint d'une immuable fixité. Alors comme la fleur plantée dans un pot de terre où les éléments nutritifs ne sont jamais renouvelés, se flétrit et se meurt à mesure qu'elle épuise les substances qui peuvent entretenir sa vie, l'organisme social immobilisé se corrompt et ne se reproduit plus. L'évolution est supprimée, et tout croulera le jour où de hardis et peu scrupuleux Espagnols viendront toucher au Colosse. Et tandis que dans les agglomérations même élémentaires mais en activité de travail social les vaincus et les vainqueurs sont absorbés les uns par les autres, se pénètrent et se mêlent pour former une autre race, ici, au contraire, tout se fond et disparaît, l'assimilation est impossible et les vaincus s'effacent laissant à peine les traces incomplètes qui permettent de reconstituer leur histoire.

Voyez l'Egypte, au contraire, là une civilisation théocratique, mais qui ne se réalisa jamais complètement. Des variations, des guerres de castes, des invasions, le travail d'assimilation continuelle entre les populations du bas fleuve et celle de la Nubie, des changements de dynastie, bref, une activité sociale que la domination exclusive des prêtres ne parvint jamais à enrayner ni à fixer. Aussi quelles différences ! Les fonctions sociologiques d'évolution sont toujours en pleine production : les connaissances s'ajoutent, l'art se transforme, des états d'esprit différents correspondent aux diverses époques et se manifestent différemment. Des sciences se créent, la netteté du climat, une tendance indéniable à l'observation, des méditations déjà savantes en font les premiers géomètres. Comme tous les peuples qui sortent à peine de la nature et qui commencent à la dominer, ils ont des tendances



à la systématisation, à la théorisation, à la classification des faits de la nature. Pour pouvoir arriver à la connaissance, il faut établir l'ordre subjectivement et objectivement. Il faut que les divers éléments qui constituent le monde se classifient en grands ensembles, puis en ensembles plus particuliers, que ces diverses classes de phénomènes se gravent dans la mémoire et qu'ils soient objectivement fixés dans le langage et dans l'écriture. Le dessin a joué là un rôle plus important que l'on ne pourrait croire au premier abord, c'est par lui que les formes ont été observées et définitivement connues dans leurs analogies et dans leurs dissemblances; par cette classification spontanée des formes, l'homme découvrait des structures analogues qui tendaient à être les variétés infinies d'un même type abstrait, et il s'éleva jusqu'à la conception et à l'expression de ce type : la comparaison des divers troncs d'arbres lui fit concevoir le cylindre, la montagne ou le monticule de sable lui donnèrent la pyramide, la vue de la lune lui fit concevoir le cercle et c'est dans la nature qu'il trouva l'image de la sphère. LES FORMES GÉOMÉTRIQUES FURENT DES FORMES NATURELLES SYSTÉMATISÉES. Ce phénomène eut son intensité la plus haute chez les Egyptiens. Cette connaissance leur donna toute une série de procédés empiriques qu'ils perfectionnèrent à l'infini et qui formèrent la base de leur art. Il y a à Rome, au musée du Capitole, deux sculptures égyptiennes représentant des singes sculptés dans le granit, la théorisation des formes y est évidente, c'est par la division d'une série de solides géométriques allant des grands ensembles jusqu'aux formes particulières que l'artiste a conçu l'aspect extérieur de l'animal. Et cependant, l'adaptation des formes théoriques aux formes naturelles est tellement précise, tellement profonde, que la raideur n'existe plus et que ces animaux frappent par l'intensité de la vie fixée dans la matière. Ce caractère dû à des règles hiératiques et à une éducation de l'esprit, l'art le conserve jusqu'au bout, mais c'était un élément puissant d'évolution et de progrès, on le vit bien lorsque, transmettant plus tard leurs traditions lointaines aux nations grecques, celles-ci en firent la première base du développement qu'elles donnèrent à leur Art sculptural.

Cet esprit de classification et de théorisation, capable cependant des méditations les plus libres, on ne le trouve pas seulement dans quelques formes isolées, il est partout. Si vous étudiez leur architecture, vous le trouverez dans l'adaptation des formes décoratives à leurs formes architecturales, dans leurs procédés de construction, dans la façon dont ils ont fait évoluer leurs édifices primitivement construits avec du pisé et du bambou vers les formes ultérieures où la pierre était exclusivement employée. Vous retrouverez cet esprit dans leur organisation sociale, dans la classification des castes, dans les attributions de la fonction sociologique, dans l'exploitation du sol et dans la structure économique, vous le retrouverez même dans leur religion et dans leurs mythes, dans la hiérarchie des diverses fonctions sacerdotales et dans les divers degrés des initiations. Je vous renvoie pour de plus amples développements au très intéressant travail de l'un de vos maîtres : *L'Évolution des croyances et des doctrines politiques* (1). Vous y verrez les particularités des divers milieux sociologiques et vous pourrez en déduire les particularités correspondantes de l'Art.

En Grèce, nous trouverons, au contraire, une civilisation militaire avortée. Là, les conditions de la conquête du sol et de l'assimilation des races autochtones furent telles que l'activité guerrière domina et absorba l'activité sacerdotale, sans pouvoir à son tour s'établir en maîtresse. Une fois le pays conquis, les diverses peuplades établies, et surtout après que l'on eût conjuré le grand danger de l'invasion médique, l'activité militaire ne put trouver un emploi suffisant pour lui permettre un développement et une domination exclusive. L'influence sacerdotale était nulle et la forme de la religion elle-même s'opposait à la possibilité d'un régime théocratique, aussi l'esprit fut libre intellectuellement d'abord, et matériellement ensuite, à cause du développement des fonctions économiques. La méditation et l'observation continuelle furent donc possibles. Ils continuèrent les Egyptiens en créant les mathématiques théoriques, ils furent les pères de la science

(1) G. de Greef, *L'Évolution des croyances et des doctrines politiques*. Paris. Alcan.

moderne et les ancêtres éternels de la Philosophie. C'est en Grèce que la direction et la forme fondamentale de l'esprit moderne a sa source. Ils ouvrirent, dit Condorcet, toutes les voies de la Vérité.

L'Art des Grecs fut le reflet immédiat, l'expression supérieure de leurs systèmes philosophiques. Jamais les fonctions sociologiques de reproduction ne présentèrent une telle activité. Aussi voit-on prédominer même dans les formes politiques les fonctions de variabilité sur les éléments de stabilité. C'est là, au fond, la véritable cause du désordre intérieur et du manque de systématisation politique particuliers à cette époque.

Les Grecs firent pour les formes intellectuelles ce qu'avaient fait les Egyptiens pour les formes naturelles, ils créèrent des types abstraits au moyen desquels ils introduisirent la classification dans la série des phénomènes. Etudiez leur art, parcourez leurs philosophies, vous trouverez des entités simples qui embrassent les différents domaines de l'activité mentale et émotionnelle. L'amour, la haine, la colère, le dévouement, la force, la beauté, la puissance ou la justice, tout cela forme des sentiments simples bien éloignés de la complexité moderne. Comparez une tragédie d'Eschyle à un poème de Lord Byron, vous verrez dans l'un toute la complication, l'inquiétude, les désirs tumultueux de l'âme moderne, dans l'autre, la simplicité, le calme, même à travers les pires circonstances; la sérénité, la lutte simplifiée entre des sentiments bien nets et définis. Comparez une statue d'athlète, ou bien cette sublime personnification de la Force : l'*Hercule Farnèse* à une œuvre moderne, le *Moïse* de Michel-Ange par exemple. Là, tout est simple, clair et calme, ici la forme est tordue et douloureuse, l'expression complexe, les sentiments se mêlent, la puissance, la force, l'inquiétude, toutes les faces d'une âme compliquée, si vaste qu'elle s'ignore elle-même et s'effraie de ses abîmes. Après avoir considéré la *Vénus de Milo*, allez voir la *Joconde*. Vous vous trouverez en face de deux philosophies de la femme essentiellement différentes : chez l'une la tête est sans expression, impassible et sereine, et c'est par la beauté calme et puissante des formes qu'elle

impose l'admiration. Chez l'autre, vous verrez au contraire un visage sur lequel on peut lire les sentiments les plus complexes et les plus divers. Le corps lui-même est enveloppé dans des vêtements qui sont bien loin de la simplicité du chiton, du dichoïdon ou du péplos. Cette âme de femme reste énigmatique et ne se livre pas. Dans le monde moderne vous traversez tout un ensemble de pensées et de sentiments que les siècles ont accumulés et différenciés, tandis que dans le monde grec vous vous trouvez plus près des origines dans le calme et la simplicité des idées générales et des formes premières, dans la solide santé intellectuelle qui caractérisa ce peuple où tout est mesuré, bien ordonné, bien net et bien clair.

Ce règlement des fonctions du cerveau maintint les Grecs dans cette si magnifique activité et fut la base première de leur esprit, elle seule leur évita ce trouble immense, cette folie générale, ces divagations infinies que nous démontre l'Art hindou, dû à un esprit spéculatif aussi, mais non réglé. Et lorsque les Grecs transportèrent le nouveau capital qu'ils avaient acquis dans le monde romain, les qualités pratiques de ceux-ci y ajoutèrent une rare puissance. Ce fut là le facteur qui permit l'incorporation des barbares à la civilisation occidentale. Son influence se poursuivit à travers les troubles et les luttes du Moyen-Age pour venir jusqu'à nous, nous apporter ce nouveau rayon d'Humanité radieuse qui nous révèle ces ancêtres directs dont nous développons l'œuvre pour l'avenir.

Le Moyen-Age, lui, nous présente une période d'élaboration confuse où une systématisation morale tendant à créer un Pouvoir spirituel se heurte dans une lutte constante avec le mouvement féodal qui tendait à constituer le Pouvoir temporel. A travers toute cette période se poursuit aussi ce grand travail de l'incorporation des barbares, et la lente élaboration du monde occidental. Quoi qu'il en soit, dans ces activités complexes une chose surgit, très apparente. Par la nature même des idées religieuses et des doctrines théologiques, par les particularités que les conditions générales de la vie introduisirent dans l'esprit, le Moyen-Age représente surtout

une culture du sentiment. Vous vous expliquez alors le caractère de cet Art que l'on appelle primitif. Vous voyez comment à côté d'une naïve observation de la nature l'expression porta surtout sur des sentiments évolués, inspirés toujours par la forme religieuse. C'est alors que s'élève l'église gothique, rêve mystique formulé dans la pierre, aspirations douloureuses vers les sereines régions du ciel, tours qui s'élèvent, emportant les désirs des âmes, formes qui reposent sur tout un grouillement d'êtres dont les habitudes naïves et les préoccupations grossières nous sont innocemment révélées. Mais à travers le Moyen-Age, et malgré son activité presque exclusivement sentimentale, l'Art reste encore implicitement conscient de sa fonction sociologique. Elle voudrait être exclusivement religieuse, mais les hérédités latines sont trop puissantes, l'âme occidentale est déjà trop grande et elle va plus loin. C'est alors l'expression d'un esprit singulièrement affiné par la souffrance, ce sont des éléments qui expriment et qui provoquent les émotions les plus pures et les plus désintéressées, c'est une véritable culture du cœur, des sentiments de pitié et d'altruisme, que certains, dans le monde moderne, n'ont pas oublié, et c'est peut-être l'Art qui représente pour ces époques la fonction d'Evolution la plus active.

Mais vient enfin la Renaissance. Avec des traditions retrouvées et transposées, avec un développement des sciences positives, une activité philosophique générale, tout le monde social bouge et se met en marche vers les époques modernes. L'héritage antique réapparaît dans toute sa vigueur, mais la culture purement intellectuelle ou juridique des deux grandes périodes grecque et romaine vient prendre sa place dans des esprits qui sortent de la culture sentimentale du Moyen-Age. La fusion de tous ces éléments détermine des formes nouvelles d'activité individuelle et sociale. A travers la lente élaboration de l'histoire les tendances politiques ont aussi changé, enfin, la science expérimentale, la politique positive et les manifestations de l'Age moderne prennent là leurs origines.

C'est malheureusement alors, dans le trouble inévitable au milieu duquel se formait un monde nouveau que les fonctions

sociologiques perdent cette homogénéité que leur conserva toujours l'empirisme primitif. C'est alors que la scission se fait. Les traditions artistiques malgré les Vinci, les Dürer, les Michel-Ange ou les Raphaël, n'ont pas le temps de se fixer, elles sont oubliées et disparaissent vite. La fonction sociale de l'Art si nettement entrevue par les grands créateurs n'est plus soupçonnée, et c'est ainsi que l'artiste ne devient plus aujourd'hui qu'un organisme de luxe, ni utile ni nécessaire, qui ne pense plus à l'Art que pour l'Art lui-même et qui n'a à satisfaire que le goût de quelques riches, la plupart du temps des parvenus grossiers sans préoccupations élevées, sans aucun goût d'intellectualité ni d'expression supérieures.

Il serait temps de réagir contre cette égoïste conception, l'individualisme qui s'affirme de plus en plus dans l'anarchie intellectuelle de cette époque est la première, la seule cause de tout ce désordre. Il n'y a plus de doctrine directrice, on ne sait où se retrouver dans la notion de l'ensemble, et l'Humanité se trouve dépourvue de ces vastes systèmes de ralliement et de coordination qui permettaient à l'effort social de ne jamais être stérile. Cependant les savants et les philosophes ont pris la place des prêtres, le capital des observations et des découvertes est devenu assez étendu pour que la fonction d'évolution, sortie de l'empirisme métaphysique des premiers âges, arrive à se baser sur la connaissance des lois naturelles, et sur la puissance qu'elles mettent au service de l'homme lorsque celui-ci sait les diriger. De nouvelles synthèses ont été tentées au cours de ce siècle, et il est permis de croire que c'est dans le développement des doctrines positives que l'Humanité trouvera l'élément d'évolution calme et paisible, la formule qui lui permettra de réaliser le bonheur. L'Art redeviendra alors la fonction sociologique la plus puissante dans l'évolution. Les sciences pourront accumuler les résultats de leurs constatations, l'Art seul fournira la langue assez pure et assez grande pour affirmer les sentiments nouveaux. Les manifestations collectives de la vie sociale lui emprunteront des éléments pour exprimer ces émotions sublimes que la parole ne peut rendre, et pour les généraliser dans la foule des hommes qui sentiront alors la

radieuse beauté que prennent les sentiments collectifs et que l'individu isolé ne peut ressentir. Chaque fois que les sociétés futures voudront exprimer un fait général, se manifester comme une activité qui embrasse l'Humanité entière dans son affirmation, c'est par l'Art qu'elles s'exprimeront. L'Art sera non seulement la langue universelle et supérieure, ce sera encore un moyen puissant d'éducation. Nous verrons plus tard comment il représente une véritable gymnastique du cœur. C'est à lui que sera dévolue la haute mission de purifier nos âmes de toutes les hérédités animales, c'est lui qui étouffera les instincts grossiers, les goûts de guerres et de sang, l'amour des actions violentes, derniers vestiges d'un âge où la pensée existait à peine et où l'homme avait la nature pour ennemie.

Ah ! qu'il nous soit permis d'espérer en ce monde nouveau, où la Pensée, maltresse du monde, aura absorbé enfin toutes les tares, toutes les indignités. Qu'il nous soit permis de rêver la Planète conquise, la satisfaction du besoin assurée à tous la Misère et la Faim disparues du monde. Ce sera alors le véritable règne de l'Esprit et du Cœur, et n'est-ce pas l'Art encore qui vient formuler la rayonnante prophétie, n'est-ce pas la poésie avec Schiller, la musique avec le grand Beethoven, qui dans la neuvième Symphonie chantèrent :

Tous les hommes sont frères  
Et n'ont qu'un même cœur.

Raphaël PETRUCCI.

## TOLÉRANCE MUSULMANE

---

Je me propose en écrivant cet article un double but : réfuter, dans l'intérêt de la vérité, l'opinion si généralement accréditée en Europe concernant l'intolérance des musulmans et laver ces derniers de l'accusation plus ou moins intéressée d'avoir exécuté par fanatisme religieux les récents massacres en Orient. Je montrerai ensuite les nobles qualités des populations musulmanes que la France a sous sa dépendance, et qui ont pris leur germe dans la religion islamique.

On dit que les Arabes de l'Algérie, réfractaires aux idées modernes, n'ont pu être assimilés par leurs vainqueurs. Mais des hommes politiques français reconnaissent eux-mêmes que les Algériens ont été fort mal gouvernés jusqu'ici, et qu'il y a eu entre eux et la civilisation occidentale des intermédiaires et des agents qui ont plutôt effrayé qu'attiré leurs sympathies. Les missionnaires dits les Pères-Blancs et certains financiers poursuivent les uns et les autres des intérêts divers, mais distincts de ceux de la République et de la France. Dans ces derniers temps seulement et depuis Jules Ferry surtout, on a commencé à étudier sérieusement les Arabes, à s'intéresser à leurs mœurs et à leur caractère, au point de vue d'un rapprochement avec la métropole.

A l'époque où l'Algérie avait un gouvernement militaire, les indigènes étaient, dit-on, plus satisfaits. Les officiers français qui avaient reconnu en eux des dispositions viriles et guerrières furent à même d'apprécier les qualités morales des vaincus.

Aujourd'hui les commerçants, les industriels, les exploiters de toute sorte, aux allures hautaines et au langage dédaigneux, blessent ces fières populations, pendant que les



missionnaires heurtent leurs sentiments religieux, en affectant de considérer leurs croyances comme des erreurs.

Ces représentants de l'Eglise ont généralement assez de religion pour haïr tout autre secte, mais ils en ont rarement assez pour aimer le prochain qui ne partage pas leur manière de voir.

Pour gouverner et gagner un peuple qui a un passé et de glorieuses traditions, il faut l'aimer, et, pour l'aimer, il faut le connaître. Lorsqu'on ne peut admettre sa religion comme vraie, et qu'on pense qu'aveugle d'esprit il a besoin d'être instruit et réformé, il est nécessaire d'user d'indulgence et de tolérance, comme on en use avec les faibles et les égarés; on doit, en un mot, les éclairer et non les contraindre. « Nous ne pouvons attendre raisonnablement que personne abandonne promptement et avec soumission ses propres sentiments pour embrasser les nôtres avec une aveugle déférence à une autorité que l'entendement de l'homme ne reconnaît point (1). »

Je sais qu'il est difficile de se débarrasser du jour au lendemain des préjugés aussi enracinés parmi les nations chrétiennes qui considèrent les musulmans comme des sectaires grossiers et fanatiques. Ces préjugés, ces préventions injustes datent du moyen âge : ils ont été combattus, dès le XVIII<sup>e</sup> siècle, par de grands écrivains, précurseurs de la Révolution française; malheureusement ces écrivains, dont le nom est cependant si souvent prononcé, ne sont plus guère lus aujourd'hui, et la foule continue toujours à juger d'après le témoignage de prêtres militants qui ont intérêt à dissimuler ou à fausser la vérité. Chaque fois que des troubles, ou qu'une guerre politique se produisent en Orient, ils l'attribuent aussitôt au fanatisme musulman. Certains journaux qui aiment à cultiver les opinions reçues répètent le même refrain.

Un écrivain distingué, qui, certes, connaît mieux que moi le sentiment français sur ce sujet, s'exprime ainsi dans un ouvrage récemment publié :

« Nous nous sommes étendus sur la tolérance religieuse

(1) Locke, *Entendement humain*.

dont l'islamisme avait fait preuve dans son expansion rapide en Occident parce que c'est parmi les nations chrétiennes que s'est accréditée l'opinion contraire, opinion si tenace qu'elle a cours encore aujourd'hui malgré le témoignage de l'histoire et des voyageurs qui ont parcouru l'Orient (1). »

On constate aujourd'hui que l'Occident est plus ou moins débarrassé des querelles religieuses et des luttes violentes qu'engendre le fanatisme, et la foule en conclut volontiers qu'il en a toujours été ainsi. Pour elle, l'histoire est lettre morte, et elle ne sait rien ou presque rien du passé. Mais les esprits éclairés n'hésiteront pas à attribuer la pacification religieuse qui règne actuellement au progrès de l'esprit scientifique plutôt qu'à l'influence du Christianisme. Ils n'hésiteront pas davantage à attribuer les derniers désordres de la Turquie non pas au fanatisme musulman, mais à la faiblesse, à l'incurie et à l'incapacité du gouvernement actuel.

Loin de moi d'exalter l'islamisme, aux dépens de la religion chrétienne. Je reconnais volontiers qu'on trouve aux origines mêmes de celle-ci de hautes et nobles pensées de clémence et d'indulgence, surtout dans les écrits des apôtres saint Paul et saint Luc qui se sont inspirés eux-mêmes des grandes traditions romaines concernant la tolérance en matière de religion, et qui sont restés pour les chrétiens orthodoxes les meilleurs maîtres en tolérance.

Saint Paul écrivait aux Thessaloniens : « Si quelqu'un vient vous annoncer un autre Christ, vous proposer un autre esprit, vous prêcher un autre évangile, vous le souffrirez ». Il écrivait encore : « Ne traitez point en ennemi celui qui n'a pas les mêmes sentiments que vous, mais avertissez-le en frère ».

Saint Luc représente Jésus sur la croix priant pour ses bourreaux, et prononçant ces paroles : « Pardonnez-leur, Seigneur, parce qu'ils ne savent pas ce qu'ils font. »

Malheureusement, ces belles paroles étaient de simples conseils, des inspirations morales; elles n'avaient point la force et l'autorité d'un ordre formel ou d'une direction im-

(1) Le Comte Henry de Castries, *l'Islam*.

posée à la conduite de l'Eglise. La religion chrétienne, ayant des préoccupations exclusivement supra-terrestres, n'a pas fait entrer ces principes dans la pratique de la vie d'ici-bas. C'est en vain que l'Evangile criait : « Aimez votre prochain comme vous mêmes. Aimez aussi vos ennemis, faites du bien à ceux qui vous haïssent, » les représentants de la doctrine chrétienne sur la terre n'en continuaient pas moins de brûler les Juifs au nom de Jésus. Les chrétiens catholiques restaient les ennemis des chrétiens protestants et tous deux portaient au même degré le fanatisme et l'intolérance contre les Israélites. Helvétius avait raison de dire : « On doit conclure que la religion, non cette religion douce et tolérante établie par J.-C., mais celle du prêtre, celle au nom de laquelle il se déclare vengeur de la Divinité et prétend au droit de brûler et de persécuter les hommes, est une religion de discorde et de sang (1). »

Le fanatisme est certainement une aberration du sentiment religieux. Une religion qui est censée d'origine divine ne peut, sans mentir à son principe, régner par la violence, la haine et les tortures. Si un Dieu a fait cette religion, il doit avoir la puissance de la soutenir sans recourir au meurtre commis par ses interprètes et ses représentants. L'intolérance n'est pas un appât qui agit sur les consciences honnêtes; elle ne crée que des hypocrites, comme on en voit un si grand nombre autour des souverains absolus des cours d'autrefois et d'aujourd'hui.

Telles sont à peu près les pensées qui ont également guidé Mahomet dans la fondation de l'islamisme. En simplifiant les dogmes de ses prédécesseurs et en ramenant l'essence de la religion à la croyance en un Dieu unique, il a arrêté du même coup les luttes provoquées par les discussions théologiques. Il s'est inspiré aussi des antiques traditions romaines dans la constitution de ses lois religieuses et civiles; il a appliqué ce principe du Sénat romain : « C'est aux dieux seuls de se soucier des offenses faites aux dieux ». Le *Koran* s'exprime sur ce point de la même façon et dit dans le ch. VI,

(1) Helvétius, *de l'Homme*.

v. 52 : « Il ne t'appartient pas de juger de leurs intentions (des non-musulmans), comme il ne leur appartient pas de juger les tiennes. »

Il semble que l'*Imitation de Jésus-Christ* n'ait fait que paraphraser Mahomet, lorsqu'elle dit :

Qu'un tel soit humble, qu'il soit vain,  
 Qu'il parle, qu'il agisse en telle ou telle sorte,  
 Encore une fois que t'importe ?  
 Ai-je mis sa conduite, ou sa langue en ta main ?  
 As-tu quelque part à sa honte ?  
 Répondras-tu pour lui de son peu de vertu ?  
 Ou si c'est pour toi seul que tu dois rendre compte ;  
 Quels que soient ses défauts, de quoi t'embrouilles-tu (1) ?

Mahomet était doux et patient. Il a donné, au cours de son existence, maintes preuves de patience et de résignation. « Supporte avec patience, dit encore le *Koran*, leurs discours et célèbre les louanges de ton Seigneur, etc. » Il s'est déclaré toujours un simple mortel et sa mission à ses propres yeux n'était que la prédication et l'enseignement. « Dis à ceux qui ont reçu les Ecritures et aux hommes dépourvus de toute instruction : Vous résignerez-vous à Dieu ? S'ils le font, ils seront dirigés sur la droite voie ; s'ils tergiversent, *tu n'es chargé que de la prédication* (2). » Son langage était celui de la douceur et de la persuasion lorsqu'il invitait le peuple à embrasser l'islamisme. Le verset suivant nous offre un exemple frappant à l'appui de notre thèse : « Dis aux Juifs et aux Chrétiens : O vous qui avez reçu les Ecritures, venons-en à un accommodement ; n'adorons que Dieu seul et ne lui associons d'autres seigneurs que lui. S'ils s'y refusent, dites-leur : Vous êtes témoins vous-mêmes que nous nous résignons entièrement à la volonté de Dieu (3). »

Mahomet a toujours ménagé les croyances antérieures et les mœurs établies ; il savait qu'il est des préjugés qu'un sage législateur doit laisser subsister dans le peuple. C'est par voie de conciliation qu'il voulait amener les diverses nations à se

(1) *L'Imitation de J.-C.*, traduction de P. Corneille.

(2) *Le Koran*, ch. III, v. 19.

(3) *Koran*, ch. III, v. 57.

fondre et à former un seul empire. La religion pour lui, au sens vrai et étymologique du mot, était un simple nouveau lien qu'il apportait à ses conquêtes et destiné à en assurer la cohésion et la durée. Il favorisait, dans ce but, les mariages entre musulmans, chrétiennes et juives, permettant même à chacun des conjoints de conserver sa propre religion. « D'ennemis que vous étiez, Dieu a réuni vos cœurs et, par les effets de sa grâce, vous êtes devenus un peuple de frères (1). » Aussi toute propagande s'appuyant sur d'autres moyens que la persuasion et l'enseignement lui paraissait-elle à la fois antipolitique et antireligieuse. Toute mesure pouvant exciter les haines et les passions violentes lui répugnait. C'est pourquoi il témoigna toujours les plus grands égards aux juifs et aux chrétiens. Il les désignait sous le nom d'*Hommes des Ecritures* et ne faisait guère de distinction entre eux et les musulmans. « Nous croyons aux Livres qui nous ont été envoyés ainsi qu'à ceux qui vous ont été envoyés. Notre Dieu et le vôtre sont un ». « Ceux qui croient et ceux qui suivent la religion juive, les sabéites et les chrétiens, quiconque croit en Dieu et qui fait le bien ; tous ceux-là recevront une récompense de leur Seigneur, seront à l'abri de toute crainte et ne seront point affligés (2). »

Cet admirable verset où il s'adresse aux savants et aux bienfaiteurs de l'Humanité, sans distinction de religion et de nationalité, prouve quelles idées larges, quel sentiment profond il avait de la tolérance religieuse : « Ceux d'entre eux qui sont forts dans la science, et les croyants qui croient à ce qui a été révélé à toi et avant toi, à tous ceux-là nous accorderons une récompense magnifique (3). »

Le grand principe de l'islamisme est celui de la continuité, de l'évolution et du progrès dans la religion même, principe qui n'est point enfermé dans les bornes infranchissables d'un dogme étroit et immuable. Mahomet admirait et honorait ses prédécesseurs, les prophètes qui avaient répandu avant lui la bonne semence ; il admettait pour l'avenir que toutes

(1) *Koran*, ch. III, v. 98.

(2-3) *Koran*, ch. XXIX, v. 45 et ch. II, v. 59.

les grandes découvertes, toutes les idées nobles pouvaient rentrer dans sa doctrine et faire partie d'un islamisme toujours plus vrai et toujours plus bienfaisant. Chaque religion était à ses yeux bonne pour l'époque qui l'avait enfantée et professée. « Dis : nous croyons en Dieu, à ce qu'il nous a envoyé, à ce qu'il a révélé à Abraham, Ismaël, Jacob et aux douze tribus; nous croyons aux livres saints que Moïse, Jésus et les prophètes ont reçus du ciel; nous ne mettons aucune différence entre eux, nous sommes résignés à la volonté de Dieu (1). » Il attribuait aux circonstances et aux nécessités du moment les modifications survenues avec le temps dans les doctrines religieuses.

« Mahomet n'est pas à proprement parler un révolutionnaire, dit M. Pierre Laffitte, il ne se donne pas comme porteur d'une religion nouvelle. Son unique prétention est de perfectionner l'ancienne. Le mosaïsme et le christianisme sont pour lui des états de plus en plus parfaits de la seule, de la vraie religion, qui existe depuis Abraham : l'islamisme. Il y a donc chez Mahomet un sentiment profond de la continuité humaine, et le respect dont il fait preuve à l'égard de ceux qu'il proclame ses prédécesseurs mérite d'être reconnu et honoré (2). »

On m'objectera peut-être que Mahomet a prêché la *guerre sainte* ; mais n'oublions pas que les *infidèles* qu'il voulait frapper n'étaient point des chrétiens ou des juifs. L'expression de *Kiafir*, par laquelle il les désigne et d'où est venu le terme vulgaire de *giavour*, ne s'applique qu'aux barbares idolâtres, à ceux qui ne sont pas *hommes des Ecritures*, et c'est ainsi que ce terme a également la signification d'impie et d'ingrat. Du reste, le verset suivant explique bien le sens du mot infidèle dans le *Koran*. « Les gens de l'Evangile jugeront selon l'Evangile. Ceux qui ne jugeront pas d'après un Livre de Dieu sont infidèles. »

Pour combattre ces infidèles, loin d'envelopper les chrétiens et les juifs dans le même anathème, il fit appel à leur concours et désira une sorte d'alliance entre les *religions*

(1) *Koran*, ch. III, v. 78.

(2) Pierre Laffitte, *Les Grands Types de l'Humanité*.

*des Ecritures contre l'impie idolâtre.* Il s'agissait de rompre l'opposition de tous ceux qui faisaient obstacle à la formation d'une puissante unité politique. La guerre, pour Mahomet, était donc une nécessité temporelle plutôt qu'une inspiration religieuse, un moyen pour combiner le dogme religieux avec l'organisation sociale. Le rôle de la guerre dans les premiers siècles de l'islamisme fut un rôle essentiellement politique, ayant pour but le groupement des tribus isolées. Elle fut déclarée non seulement aux idolâtres et aux chrétiens, mais à tous les musulmans qui cherchaient à diviser la nation et à porter ainsi atteinte au grand problème de l'unité islamique. Et même, tout en prêchant la guerre sainte, il rappelle qu'on ne doit pas oublier la Justice et l'Humanité, ni provoquer ceux qui ne vous attaquent point. « Combattez dans la voie de Dieu contre ceux qui vous font la guerre ; mais ne commettez pas d'injustice en les attaquant les premiers, car Dieu n'aime pas les agresseurs. » Ne leur livrez point de combats auprès de l'oratoire sacré, à moins qu'ils ne vous y attaquent (1).

Dans la pensée de Mahomet, ces guerres saintes n'avaient d'ailleurs pas et ne devaient pas avoir le caractère farouche et sanguinaire qu'on leur a trop souvent attribué. La religion exige du chef musulman qu'avant toute déclaration de guerre il propose à son adversaire le choix entre ces trois partis : embrasser l'islamisme, payer tribut ou s'en remettre au sort des armes.

En parlant de la guerre sainte chez les musulmans, mon éminent maître, M. Pierre Laffitte, s'exprime ainsi : « Mais faut-il croire que par là Mahomet a allumé dans l'âme de ses disciples une rage de persécution, une fureur de sang, que les succès les plus persistants n'ont pu étindre ? Rien n'est plus contraire à la vérité. Si aucune religion n'a compté des triomphes plus rapides et plus éclatants, aucune ne s'est montrée plus généreuse et plus tolérante. Les musulmans ont entrepris la conquête du monde, mais là s'arrête leur crime, qui est celui de tous les conquérants. Sans rappeler

(1) *Koran*, ch. II, v. 186 et 187.

que presque partout où ils ont porté leurs armes, ils ont rempli une mission civilisatrice, nous dirons que jamais ils ne se sont faits les persécuteurs du peuple conquis. En déclarant la guerre aux infidèles, ils leur donnaient le choix entre trois choses : 1° ou d'embrasser le mahométisme, et dans ce cas ils participaient immédiatement à tous les droits et à tous les privilèges des musulmans ; 2° ou de se soumettre et de payer un léger tribut, et alors ils demeuraient libres de professer leur religion, pourvu qu'elle n'eût rien de contraire à la morale ; 3° ou enfin de se battre. Où trouve-t-on dans cette conduite la férocité implacable, le fanatisme barbare dont on s'est plu à doter les disciples de Mahomet ? Le Prophète a-t-il ordonné, comme Moïse, qu'on exterminât jusqu'au dernier homme les sept peuples de Chanaan ? Où sont ces atrocités épouvantables qui nous ont valu tant de tirades larmoyantes et éveillé si longtemps la compassion indignée des âmes sensibles ? Nous voudrions pour le catholicisme qu'il eût toujours fait preuve envers ses adversaires de la tolérance, de la longanimité, de la douceur, dont l'islamisme n'a cessé d'être animé à l'égard des siens. Nous voudrions pour lui qu'il eût à montrer dans son passé plus d'un Mahmoud et plus d'un Akbar. Il est vraiment plaisant de la part de ceux qui ont inventé l'inquisition et les dragonnades et mis toutes les tortures au service de leur foi de venir parler de persécutions et de cruautés (1). »

Qui ne connaît le discours d'Abou-Bekr au moment où il allait entreprendre la conquête de la Syrie ? Il recommande à ses troupes de combattre bravement et loyalement, de ne pas user de perfidie envers les ennemis, de ne pas mutiler les vaincus, de ne tuer ni femmes, ni enfants, ni les vieillards, de ne pas brûler les moissons, de ne pas couper les arbres, etc. On voit par là que les successeurs de Mahomet ont prêché et pratiqué l'humanité et la tolérance dans la plus large mesure, et, certes, ces hommes n'étaient conduits à professer de tels principes, ni par faiblesse, ni par crainte.

L'abbé de Broglie parlant d'Abou-Bekr et d'Omar, « ces

(1) Pierre Laffitte, *Les grands types de l'Humanité*.



deux Arabes, dit-il, appelés à gouverner un immense empire, n'ont pas été au-dessous de leur tâche et se sont montrés fermes, justes, sobres, énergiques et infiniment supérieurs aux empereurs et aux gouverneurs chrétiens qu'ils combattaient (1). »

Comparez un instant la prise de Jérusalem, par Omar, avec celle des Croisés et la conquête de Constantinople, pays chrétien à cette époque, par les Croisés, avec celle de Mahomet II. Il est superflu de mettre en parallèle les deux adversaires en Espagne. « Le *Koran*, dit Michaud, qui commande de combattre la religion avec l'épée, est tolérant pour les religieux. Il a exempté de l'impôt les patriarches, les moines et leurs serviteurs ; Mahomet défendit spécialement à ses lieutenants de tuer les moines, parce que ce sont des hommes de prière. Quand Omar s'empara de Jérusalem, il ne fit aucun mal aux chrétiens. Quand les Croisés se rendirent maîtres de la ville sainte, ils massacrèrent sans pitié les musulmans et brûlèrent les juifs (2). »

« Les musulmans sont les seuls enthousiastes, dit à son tour Robertson, qui aient uni l'esprit de tolérance avec le zèle du prosélytisme et qui, en prenant les armes pour propager la doctrine de leur prophète, aient permis à ceux qui ne voulaient pas la recevoir de rester attachés aux pratiques de leur culte (3). »

La liberté de culte et la tolérance étaient si grandes sous la domination des musulmans en Espagne et à Bagdad que non seulement les juifs persécutés et martyrisés partout ailleurs venaient chercher un refuge auprès des Kalifs, mais que de grands écrivains, d'illustres philosophes trouvaient chez eux une hospitalité bienveillante et éclairée. Les ouvrages d'Averroës ont été mis à l'index par la Sorbonne comme entachés de matérialisme, tandis qu'ils étaient lus et estimés à la même époque dans le monde musulman tout entier. Après la prise de Grenade, en 1492, Ferdinand et

(1) Abbé de Broglie. — *Problème et Conclusion de l'Histoire des Religions*.

(2) Michaud. — *Histoire des Croisades*.

(3) Robertson. — *Histoire de Charles-Quint*.

Isabelle chassèrent de la ville tous les habitants qui ne professaient pas la religion chrétienne et livrèrent aux flammes plus d'un million de manuscrits arabes. Ce n'est pas Omar qui a brûlé, ainsi qu'on le répète si souvent, la bibliothèque d'Alexandrie. Renan, Ed. Quinet et le docteur Draper ont fait depuis longtemps justice de cette absurde calomnie.

Pour donner enfin un exemple frappant de la liberté de pensée et de la tolérance religieuse que les musulmans accordaient même à l'apogée de leur grandeur, je reproduirai ici un récit extrait de *l'Islamisme et la Science* de Renan :

« Un docteur de Kairouan demande à un pieux théologien espagnol, qui avait fait le voyage de Bagdad, si, pendant son séjour dans cette ville, il avait assisté aux séances des *mutekellimine*. « J'y ai assisté deux fois, répond l'Espagnol, mais je me suis bien gardé d'y retourner. — Et pourquoi ? lui demanda son interlocuteur. — Vous allez en juger, répondit le voyageur. A la première séance à laquelle j'assistai, se trouvèrent non seulement des musulmans de toute sorte, orthodoxes et hétérodoxes, mais aussi des mécréants, des guèbres, des matérialistes, des athées, des juifs, des chrétiens ; bref, il y avait des incrédules de toute espèce. Chaque secte avait son chef, chargé de défendre les opinions qu'elle professait et, chaque fois qu'un de ces chefs entrait dans la salle, tous se levaient en signe de respect et personne ne reprenait sa place avant que ce chef se fût assis. La salle fut bientôt comble, et lorsqu'on se vit au complet, un des incrédules prit la parole : « Nous sommes réunis pour ra-  
« sonner, dit-il. Vous connaissez tous les conditions. Vous  
« autres, musulmans, vous ne nous alléguerez pas des raisons  
« tirées de votre livre ou fondées sur l'autorité de votre pro-  
« phète ; car nous ne croyons ni à l'un ni à l'autre. Chacun  
« doit se borner à des arguments tirés de la raison. » Tous applaudirent à ces paroles. Vous comprenez, ajoute l'Espagnol, qu'après avoir entendu de telles choses, je ne retournai plus dans cette assemblée. On me proposa d'en visiter une autre ; mais c'était le même scandale. »

Si les Turcs n'ont pas continué la tradition de la civilisation arabe, ils n'ont pas moins été imprégnés des idées

morales que Mahomet avait semées dans tout l'Orient. La tolérance fut un de leurs actes de foi et, dans leurs expéditions guerrières, toujours ils respectèrent les croyances des vaincus en leur accordant le droit d'administrer leurs écoles et leurs églises. Voltaire, qui n'est pas suspect de partialité à l'égard des Turcs, reconnaît cependant qu'ils usèrent à toute époque de la plus large tolérance envers les chrétiens. « Sortons de notre petite sphère, examinons le reste de notre globe. Le Grand-Turc gouverne en paix vingt peuples de différentes religions ; deux cent mille Grecs vivent avec sécurité dans Constantinople. Le *mufti* nomme et présente au sultan le patriarche grec ; on y souffre un patriarche latin. Le sultan nomme des évêques, cet empire est rempli de jacobites, de nestoriens, de monothélites ; il y a des cophtes, des chrétiens de Saint-Jean, des juifs, des guèbres. Les annales turques ne font mention d'aucune révolte excitée par aucune de ces religions. Allez dans l'Inde, dans la Perse, dans la Tartarie, vous y verrez la même tolérance et la même tranquillité (1). »

Les voyageurs qui ont visité Constantinople et la Turquie, non pas avec les guides attachés aux hôtels, presque tous appartenant aux confessions hostiles à l'islamisme, mais avec des musulmans ou même sans cicerone aucun, ont pu constater de leurs propres yeux que les Turcs sont exempts de fanatisme et n'ont jamais touché à un chrétien pour des raisons concernant la religion. « Il est triste, dit l'abbé Michon, pour les nations chrétiennes que la tolérance religieuse qui est la grande loi de charité de peuple à peuple leur ait été *enseignée* par les musulmans. C'est un acte de religion que de respecter la croyance d'autrui et de ne pas employer la violence pour imposer une croyance (2). » Le gouvernement ottoman a conservé par les *Hatts* le libre exercice de tous les cultes professés dans l'Empire. En Occident, quand on rapporte des faits d'intolérance, on s'imagine généralement que les musulmans interviennent directement dans l'exercice du culte des chrétiens pour en arrêter ou troubler la célébration. Mais

(1) Voltaire. — *Traité sur la tolérance*.

(2) L'abbé Michon. — *Voyage religieux en Orient*.

nulle part au monde, le prêtre ne possède des prérogatives et une liberté aussi étendue qu'en Orient ; presque maître absolu de son église, il peut étendre en quelque sorte jusque dans la rue le domaine de son pouvoir spirituel. Une communauté paroissiale a le droit chez nous, toutes bannières déployées, de traverser et d'encombrer les rues d'une ville qu'elle emplit de ses chants et de ses homélies.

Un peuple qui autorise en plein air un pareil déploiement d'une religion qui n'est pas la sienne peut-il être suspecté d'hostilité et d'intolérance ?

La meilleure preuve qu'on puisse invoquer en faveur de la tolérance des Turcs réside dans ce fait que les peuples conquis ont conservé jusqu'à ce jour leur religion, leurs communautés et leur langue. Il est vrai que ces concessions faites à l'esprit religieux chrétien par le gouvernement ottoman de tout temps tournèrent à son préjudice et c'est à ce large esprit de tolérance, au respect qu'il témoigne à la religion et à la nationalité des vaincus, qu'il faut attribuer la principale cause du démembrement et de la décadence de la Turquie.

Loin de moi la pensée de restreindre cette tolérance en Orient ; mais une liberté qui inspire une sorte de licence capable de troubler l'ordre et la société, qui favorise les révoltes et qui nuit à la solidarité, à l'unité des peuples et à l'intégrité d'un Empire, doit être canalisée et surveillée dans l'intérêt de tous. S'il ne dépend pas d'un homme de croire à la religion dominante qu'il ne comprend pas ou de ne plus croire à la religion dans laquelle il a été élevé, il dépend certainement de lui de respecter les lois et les usages de sa patrie.

S'il est à la fois tyrannique et insensé de haïr et de tourmenter un citoyen à cause de ses opinions religieuses, philosophiques ou politiques, il est aussi nuisible à l'ensemble d'une institution et au principe de l'évolution de permettre à un individu ou à un gouvernement d'imposer des doctrines ayant pour but de rompre par la violence les liens qui unissent politiquement des peuples divers. « Rien de plus injuste, disait avec raison le baron d'Holbach, de plus inhumain, de plus extravagant, de plus contraire au repos de la société, que de

haïr et de persécuter ses semblables pour des opinions, mais, dira-t-on, si ces opinions sont dangereuses ne faut-il pas les étouffer ? Les opinions ne sont dangereuses que lorsqu'on veut les faire adopter par force à d'autres : le crime est toujours du côté de celui qui le premier emploie la violence (1). »

A considérer l'histoire, il semble cependant qu'un gouvernement fort a tort de laisser aux peuples vaincus des droits politiques et religieux, qu'ils lui soient dictés par un large esprit de tolérance ou par le dédain des populations soumises, car lorsque vient plus tard la faiblesse ou l'impuissance il n'a plus d'autorité nécessaire pour arrêter les revendications qui se sont créées à l'ombre de sa tolérance. Tous les soulèvements des nationalités de l'Empire ottoman depuis les premières insurrections des Grecs jusqu'aux dernières révoltes des Crétois et des Arméniens ne sont que la conséquence d'un état de fait qui n'aurait jamais existé si le gouvernement d'alors avait surveillé dès l'origine leurs tentatives séparatistes ; encouragées d'ailleurs par la capitulation que les sultans eurent la générosité d'accorder aux Européens. C'est donc à la faiblesse actuelle du gouvernement, d'une part, et aux intrigues habilement exploitées par certains agents étrangers, d'autre part, qu'il faut attribuer les derniers massacres qui sont la honte de l'Humanité et contraires aux principes de la tolérance musulmane.

Ahmed RIZA.

(1) D'Holbach. — *Morale universelle*, tome I.

---

# BULLETIN DE FRANCE

---

## I. — Célébration du 38<sup>e</sup> anniversaire de la mort d'Auguste Comte.

Selon l'usage traditionnel, l'anniversaire de la mort d'Auguste Comte, ou plutôt de son entrée dans sa glorieuse vie subjective, a été célébré : — le matin, par un pèlerinage au cimetière du Père-Lachaise, au cours duquel MM. Petrucci, Fagnot et Delbet ont pris successivement la parole sur les tombes du fondateur du Positivisme, de Fabien Magnin, de la famille Robinet et de Clotilde de Vaux ; — l'après-midi, par une réunion, 10, rue Monsieur-le-Prince, dans laquelle M. Frédéric Harrison, président du *Comité positiviste de Londres*, a prononcé un important discours qui a été intégralement reproduit par le journal la *Paix*, du 6 septembre ; — le soir, par un banquet, à la fin duquel lecture a été donnée de télégrammes envoyés par MM. Mignoneau, au nom du *Groupe positiviste bordelais*, Grimanelli, préfet de l'Oise, Th. Cattin (Mont-de-Marsan), André Richer (Soustons), Albert Jabely (Benevent), Darimon (Dijon), etc... Divers toasts ont été également portés par MM. Delbet, Harrison, Petrucci, Navez (Anvers), Keuffer, etc...

C. H.

### DISCOURS PRONONCÉ SUR LA TOMBE D'AUGUSTE COMTE

*Par M. Raphaël Petrucci.*

Mesdames, Messieurs,

Nous venons aujourd'hui évoquer sur cette tombe la mémoire de celui dont l'œuvre inspira nos efforts, dont la discipline intellectuelle a réglé notre développement, et dont la grande intelligence comme le grand cœur ont formulé une œuvre immense, base première d'une Humanité meilleure dont les siècles qui vont venir verront le glorieux accomplissement.

Il y a deux façons d'honorer ceux dont les œuvres ont résumé ou provoqué l'évolution progressive de notre espèce : la première consiste à les considérer dans leur vie et à tirer de leur exemple un enseignement personnel ; la seconde, c'est de songer à leur œuvre et de la considérer aussi bien dans son essence que dans ses développements futurs. Ces méditations agrandissent le domaine de l'esprit comme celui du cœur, mais si, par les unes, nous sommes

conduits à une amélioration qui est la base nécessaire d'une vie normalement et dignement vécue, les autres nous montrent quelle doit être notre action dans le milieu social, quelles sont les préoccupations que le développement historique de l'Espèce nous impose, et avec les droits qu'elles nous indiquent, nous formulent aussi des devoirs.

De semblables réflexions sont plus que jamais nécessaires. L'anarchie intellectuelle au milieu de laquelle COMTE édifiait son œuvre caractérise encore les dernières années de ce siècle agonisant. Nous voyons s'accumuler autour de nous les ruines des vieilles croyances et des anciens systèmes, et dans la confusion de ces chutes retentissantes, dans le choc des intérêts égoïstes que représentent aujourd'hui ces architectures surannées, devant la dangereuse situation des peuples de l'Occident qu'une politique néfaste a conduits à un état de rivalités sanglantes, nous serions livrés aux plus douloureuses incertitudes si, au milieu de ce monde croulant, ne se dressait le solide édifice des conceptions positives, doctrine de science et de philosophie sereine qui nous apporte le consolant espoir des jours nouveaux.

L'étude de l'Humanité nous montre d'ailleurs des évolutions analogues, et par bien des côtés notre époque peut nous rappeler des époques antérieures, périodes de crises que vécurent nos ancêtres et qu'ils surent triomphalement franchir. Dans l'immense dissolution de l'ancien empire, alors que la raison fatiguée ne pouvait plus que formuler des critiques négatives, et qu'une activité sans but se dépensait dans les plus dégoûtantes débauches, c'est l'histoire qui nous désigne un grand constructeur comme saint Paul qui, systématisant les efforts des hommes et les ordonnant vers un but nouveau, se montrait le digne continuateur des ancêtres et provoquait un absolu renoncement de soi-même là où n'existait plus qu'un monstrueux égoïsme et un complet désintéressement des destinées futures.

La puissante évolution qui succéda et la lente mais sûre constitution, de plus en plus étendue, de l'esprit positif donnent à l'époque moderne, malgré l'analogie de la situation, un caractère cependant bien supérieur, et si nous voulons envisager les conditions nouvelles de notre vie et de notre milieu, nous pouvons conclure avec oie que nous assistons au dernier retour d'un semblable état de choses, et que le Positivisme introduira définitivement dans l'activité humaine une direction suffisamment convergente de ses divers éléments constitutifs, pour devenir la théorie qui ouvrira une ère nouvelle, plus harmonique et plus normale, dans la succession des siècles à venir.

Et ceci n'est pas une affirmation passionnée, venue de l'enthousiasme aveugle ou d'un optimisme irréfléchi, mais c'est une certitude basée sur la philosophie et sur la science. Car si l'Humanité,

dans son évolution, a subi et subit encore de si fortes crises, si, à certaines époques douloureuses de sa croissance, ses diverses fonctions sociales se heurtent dans un antagonisme désordonné, c'est parce que la systématisation, la concentration de tous les efforts n'a pas été basée sur une culture suffisante de l'homme et qu'au déclin des grandes doctrines, le courant général n'est plus assez fort pour établir une action convergente; que ce qu'il y a de primitif en nous, tout l'ensemble des sentiments égoïstes qui constituent notre structure individuelle, arrive à prendre la prédominance sur les sentiments éminemment sociaux de l'altruisme.

Or, ce n'est plus par une idée métaphysique ou religieuse, par la contemplation d'un Dieu placé hors de la nature et de l'homme que sera constitué le levier assez puissant pour mouvoir toutes les monades humaines dans une action harmonique vers un même but. Auguste COMTE nous a appris à trouver dans l'Humanité même, dans la contemplation et l'étude des grands hommes, la culture morale nécessaire pour nous faire comprendre toute la portée de nos actes et pour les coordonner vers un effort par lequel, en produisant le bien général, nous aurons construit aussi notre félicité particulière. Et lorsque nous considérons cette longue succession d'hommes illustres qui accumulèrent le savoir et contribuèrent à constituer la caractéristique des âges; lorsque nous les voyons, avec la conscience obscure de leur mission sublime, grands par la pensée comme par les œuvres, porter dans leur vaste cœur de l'amour pour tout un monde, nous nous sentons élevés à ces hauteurs, inaccessibles à l'esprit seul et que la méditation nous fait atteindre par les plus grandes et les plus pures émotions du cœur. Alors, nous pouvons concevoir cet âge nouveau où l'Humanité, prenant la place de Dieu, offrira un but concret à nos efforts; nous pouvons concevoir, au-dessus des difficultés temporaires, la fraternelle union de tous les hommes et de tous les peuples, et comme nos types et nos guides sont à côté de nous, dans l'histoire ou dans la vie, nous n'éprouverons jamais l'immense sensation d'écrasement à laquelle aboutit toujours la contemplation religieuse, et nous nous sentirons la puissance d'accomplir l'œuvre avec, pour récompense, la magnifique vision de cet âge où, sur la planète enfin pacifiée, l'Humanité, n'ayant d'autre but que son propre bonheur et sa propre gloire, atteindra à la plus élevée des cultures comme à la plus grande activité du cœur.

Les sceptiques qu'a produits le désordre intellectuel de ce siècle nous railleront peut-être, et les timides prononceront les mots de « chimère » et de « rêve ». Pour nous qui allons chercher dans la hiérarchie des sciences l'origine de nos conceptions philosophiques nous les savons appuyées sur une trop forte base pour nous ébranler devant des critiques qui ne masquent que de l'impuissance. Car le passé représente la justification de notre œuvre, et nous ne



la cherchons que dans les développements et la satisfaction de désirs que l'Humanité mit des siècles à formuler. Ce qui fut une aspiration confuse, un sentiment obscur des âmes, devient pour nous une idée claire, précise, que nous savons définir aux autres et à nous-mêmes. D'ailleurs, sans parler de l'immense effort d'incorporation que représente la conquête romaine, l'histoire ne nous montre-t-elle pas, comme le dit COMTE, que depuis Charlemagne les diverses populations qui composent l'Occident « ont toujours « marché synergiquement, d'une manière plus ou moins prononcée, soit dans le développement temporaire du système catholique et féodal et dans sa désorganisation ultérieure, soit dans « l'essor à la fois industriel, esthétique, scientifique et philosophique « qui a formé les rudiments de notre sociabilité moderne ». La Révolution, quoique basée sur une élaboration philosophique incomplète, avait, aussi, confusément senti la possibilité de la constitution d'un peuple occidental, et nous pouvons nous souvenir de certaines séances de la Convention où Anarcharsis CLOOTZ, « le citoyen cosmopolite », présentait à l'Assemblée les délégations des divers peuples de l'Europe. Vers 1848, alors que COMTE était en pleine activité dans son labeur immense de rénovation sociale, ne pouvait-on prévoir que le jour était proche où l'un des buts les plus immédiats auquel tende le Positivisme serait atteint ? Mais, par deux fois, la honteuse politique des Bonaparte recula le moment d'un semblable progrès, et le second Empire légua à l'Europe tous ces levains de conflits et de haine dont le monde souffre encore. Cependant une opinion publique occidentale se constitue, et à mesure que les ruines s'entassent, que les actions politiques se contredisent, que le désordre croît, à mesure que le temps passe dans la crainte continuelle d'une secousse sanglante, il s'établit, d'autre part, des liens qui contrebalancent la puissance de ces éléments de trouble, et il se produit aussi une évolution qui rapproche de plus en plus les individus et les sociétés de l'idéal nouveau. L'extension des idées positives, leur intervention dans l'éducation philosophique et scientifique, ne sont sans doute pas étrangères à cette transformation. Un jour viendra où, l'évolution étant enfin réalisée dans les esprits et dans les mœurs, elle marquera son empreinte sur les formes sociales, et ce jour-là, Messieurs, le Positivisme aura triomphé.

Oui, nous nous sentons le droit, et surtout le devoir, d'appeler à nous, d'organiser et de coordonner l'activité de l'Occident, nous qui représentons l'œuvre continue d'une longue série d'ancêtres, nous qui basons notre évolution, non pas sur une négation impie de la Patrie, mais bien sur une action convergente et harmonieuse des divers groupes qui constituent le Monde occidental. Et nous sentons revivre dans nos âmes cet obscur désir, inconscient de lui-même, qui portait les Gaulois à s'incorporer si rapidement au

monde romain, cette sourde espérance, balbutiée dans l'auguste splendeur des Eglises par tout ce peuple chrétien du Moyen-Age. Ces sentiments indéterminés, tendresses et joies cachées de l'esprit de nos pères, le Positivisme nous les définit, et par la clarté qu'il projette sur notre structure mentale et sociale, il nous permet justement la glorieuse satisfaction de ces désirs si lents à éclore, si longs à formuler; au bord du monde nouveau, nous sentons revivre et s'agiter en nous tout le vieux monde; ce n'est pas en reniant l'œuvre des ancêtres, mais en la continuant, que nous pouvons nous trouver tous frères dans la même pensée et dans la même action, et c'est bien en ce jour où nous commémorons une grande mémoire que nous pouvons oublier les graves difficultés de l'heure présente pour nous arrêter dans l'action, et contempler vers l'avenir l'immense développement de ce monde futur, plein d'amour et plein de gloire, terre promise que le Maître nous a montrée et où nos enfants entreron.

Devant les restes sacrés qui reposent sous cette tombe, nous venons apporter comme le plus juste hommage nos désirs et nos espoirs. Fils de sa pensée et de son génie, nous tous qui représentons trois générations inspirées de son œuvre, nous venons ici nous affermir dans sa tradition grandiose, et qu'il me soit permis, à moi qui suis des plus tard venus, d'augurer à notre chef, à ce vieillard qui fut son ami et qui est notre maître, de vivre assez encore dans le soir de sa grande vie pour voir un nouveau triomphe dans la lutte et une première réalisation des félicités glorieuses de l'avenir.

---

#### DISCOURS DE M. FAGNOT

##### *Sur la tombe de Fabien Magnin.*

Mesdames, Messieurs,

Après l'éloquent hommage qui vient d'être rendu à notre fondateur, nous venons, suivant l'usage, saluer la mémoire de Fabien Magnin, l'un de ses premiers et de ses plus dévoués disciples.

Nombre d'entre vous, l'ayant connu et hautement apprécié pendant sa vie, savent mieux que celui qui parle l'importance des services qu'il a rendus, pendant près de quarante années, au groupement des forces naissantes du Positivisme et même à l'élaboration de la doctrine

Je voudrais simplement rappeler, en ce jour de commémoration et de véritable fête, deux traits essentiels de son action positiviste, lesquels, de l'avis de tous, eurent une influence profonde sur la permanence de notre Société.

Le premier, fidèlement transmis par votre tradition, traduit le dévouement constant de Fabien Magnin envers l'organisation de la Société. Par une inclination naturelle, il se donnait surtout pour but d'accroître la persévérance ou de fortifier la foi et le courage de ses confrères dont, pour la plupart, il avait beaucoup facilité l'accession au Positivisme. Doué de la sociabilité la plus exquise, il employa, jusque dans les dernières années de sa vie, tous ses loisirs à faire d'amicales visites à nos confrères, et surtout à ceux qui, pour un motif quelconque, ne pouvaient assister régulièrement aux réunions de la Société.

Il avait formé, sous l'Empire, un groupe positiviste parmi les prolétaires de Puteaux. Après 1871, les membres du groupe étant disséminés sur divers points de la banlieue de Paris, il organisa ses tournées de propagande individuelle, propagande qu'il savait être éminemment féconde. Soutenu, dans ses courses fatigantes à son âge et après une journée de travail à l'atelier, par l'intime satisfaction et le besoin de se rendre utile au Positivisme, on le voyait alors presque chaque soir quitter Pantin pour accomplir son apostolat ou assister à une réunion positiviste, dont il était l'un des attrait.

Par les témoignages d'intérêt et de sympathie qu'il donnait ainsi à chacun, au sein de la famille, il fortifiait le lien qui nous unit en réchauffant le zèle de tous, au point qu'il n'était pas possible d'oublier totalement le chemin de la rue Monsieur-le-Prince.

Tout en éprouvant, dans ses cordiales visites à domicile, de douces satisfactions personnelles, il maintenait, uni et compact, le petit noyau d'adhérents autour de notre cher directeur, M. Laffitte, pour lequel il a toujours eu une profonde admiration, jointe à une active sympathie.

Ces bons sentiments pour notre directeur — et c'est là le second trait qui accroit tant notre vénération pour sa mémoire — il les lui a manifestés dans plusieurs circonstances difficiles, causées par l'impatience de quelques confrères, d'opinion divergente sur le meilleur mode de propagation du Positivisme. Reconnaisant hautement le rare mérite du digne successeur de notre Maître, en même temps que la nécessité de se grouper autour de lui, il se rangea toujours et sans hésitation du côté du bon droit et du devoir ; aussi contribua-t-il beaucoup, par cette attitude décisive autant qu'honorable, à préserver la Société d'une désagrégation des plus périlleuses.

Si je rappelle cette preuve du dévouement éclairé de Fabien Magnin à l'œuvre commune, ce n'est point pour en déduire, n'étant pas pour cela suffisamment qualifié, que l'un des devoirs rigoureux du positiviste convaincu est de rester toujours fidèle à la Société, comme le soldat à son drapeau, dût-il en coûter quelques sacrifices. Je voudrais bien plutôt remarquer que cette mission délicate et

quelquefois difficile de resserrer sans cesse les liens du groupement a été accomplie, pendant de longues années, par un prolétaire. A ce point de vue du ralliement, peut-être plus important qu'il ne semble, les services rendus par Fabien Magnin me paraissent être un attribut naturel de sa condition de prolétaire. Dans l'ordre social, les plus faibles sentiront toujours mieux la nécessité du groupement, et tous les bienfaits qu'on en peut retirer. De plus, si le prolétaire ne peut exercer, à notre époque du moins, qu'une influence secondaire sur l'avenir du Positivisme — puisque cet avenir dépend surtout de l'organisation de l'enseignement de la doctrine rénovatrice — du moins peut-il mettre très utilement son énergie et son activité spontanées au service du groupement et du développement des forces positivistes.

Dans cet ordre d'idées, Fabien Magnin a donné le plus salubre exemple d'action persistante et de discipline volontaire. Il a tracé nettement la voie à ses successeurs et nous saurons la suivre. C'est bien le moins, d'ailleurs, qu'en échange de tous les bienfaits que nous retirons de notre belle doctrine, nous lui consacrons les dispositions pratiques qui nous sont propres, et qu'ainsi chacun fasse, suivant ses moyens, un effort pour rendre au Positivisme une faible partie de ce qu'il en a reçu.

Par ses nobles facultés de cœur et d'intelligence, si heureusement développées par le Positivisme, et consacrées ensuite entièrement à son service, Fabien Magnin sera toujours, pour les prolétaires positivistes, un modèle à imiter. Sa figure est à jamais attachée aux premiers pas de la nouvelle et définitive Religion de l'Humanité ; aussi mérite-t-elle amplement les hommages sincères que nous venons pieusement lui rendre chaque année. Et l'hommage qui sera de beaucoup le plus agréable à la mémoire vénérée de Fabien Magnin est la résolution que nous prenons ensemble, devant sa tombe, de faire de nouveaux efforts pour propager autour de nous, surtout par l'exemple, la seule doctrine apte à résoudre les graves problèmes sociaux de notre temps.

---

#### DISCOURS DE M. FRÉDÉRIC HARRISON

Mes chers Confrères,

Si j'ose me présenter devant un auditoire français, en parlant, d'une manière si imparfaite, votre langue gracieuse, c'est que je suis profondément convaincu du caractère international de notre action publique, et que je reconnais la suprême importance d'une organisation occidentale.

Appelé par notre vénérable chef à prendre la parole, en son absence, dans ce berceau de la *Religion définitive*, à la trente-huitième commémoration de la mort de son fondateur, je me sou mets pleinement à la Direction centrale, assuré qu'un positiviste sérieux, quelles que soient sa nationalité et sa langue originelle, se trouvera, toujours et partout, parmi des confrères bienveillants et des coréligionnaires sympathiques.

Autre chose, du reste, qui me donne le courage — je dirais plutôt, qui m'impose le devoir — de m'adresser à cette réunion des positivistes français (qui, d'ailleurs, ne sont pas tentés à fonder une frivole Académie de déclamation) c'est que je suis chargé par vos confrères à Newton-Hall, où je préside, de vous assurer de leur inébranlable dévouement à notre vénéré maître, Pierre Laffitte.

Qui donc, mes frères, pendant les quarante ans, à peu près, qui se sont écoulés depuis la mort d'Auguste Comte, a tenu le drapeau d'une religion pleinement scientifique, d'une synthèse rationnelle, humaine, sociale et morale, en même temps, si ce n'est notre directeur actuel ? Qui a travaillé, nuit et jour ? Qui a créé des cours complets d'enseignement populaire, libre, gratuit, encyclopédique, quoiqu'à la portée du peuple travailleur ? Qui a conquis le respect sympathique pour les principes du Positivisme, chez les meilleurs esprits de notre époque, et parmi les hommes d'Etat les plus sérieux de la France, sinon l'esprit profond et la vaste connaissance de Pierre Laffitte ? C'était bien lui qui, jadis, à travers les tristes années de l'Empire en décadence, s'efforçait de former, dans ce lieu, où Auguste Comte est mort, un très petit groupe de positivistes convaincus. C'est lui aussi qui, aujourd'hui, est acclamé, dans des séances enthousiastes, qui est écouté constamment par les vrais chefs de la République.

Je me rappelle un incident historique, qui s'est passé aux premières années de la République actuelle, quand le grand orateur, qui, le premier des hommes d'Etat de son époque, a proclamé Auguste Comte le plus grand penseur de ce siècle — je veux dire Léon Gambetta — a produit un revirement électrique dans l'Assemblée nationale de Versailles par son fameux mot : « Voilà le vrai libérateur du territoire ! » désignant M. Thiers d'un geste éloquent. Quand je promène mes yeux autour de cet appartement modeste, au milieu des souvenirs si simples des origines du Positivisme ; quand je me rappelle combien la Religion de l'Humanité était plongée dans l'obscurité et l'indifférence générale, à la mort de son fondateur ; quand je vois l'intérêt et la confiance

qu'elle inspire aujourd'hui je me tourne vers le vénérable successeur d'Auguste Comte, et les mêmes mots me montent aux lèvres : — *Voilà le libérateur du Positivisme* — tiré enfin de l'oubli, du mépris, où le monde académique et rétrograde voulait l'enterrer dans le tombeau solitaire d'Auguste Comte.

Certes, je ne voudrais pas attribuer aucun papisme, aucun mahdisme, à notre cher directeur, qui, de tous les hommes, serait le dernier à se poser comme un saint Grégoire ou un saint Dominique. Le Positivisme rejette, avec raison, toute infaillibilité. *Tout est relatif*. Si aucun dogme n'est indiscutable, immobile, assurément nous ne sommes pas enchaînés par les paroles d'Auguste Comte, et encore moins par celles de M. Laffitte, qui, du reste, n'a jamais eu la prétention de se comparer à l'incomparable Maître.

Nous pouvons — je dirais même nous devons — de temps en temps nous dégager de ses jugements personnels, ou des appréciations pratiques qu'il formule sur les hommes actuels, et sur des incidents politiques. Le Positivisme n'est pas une sorte d'appareil de Røetgen qui peut traverser tout obstacle. Et dans les affaires mondaines si compliquées, le rôle de l'ambiguïté est toujours grand. M. Laffitte a manqué, comme on prétend, aux choses qu'un directeur idéal aurait pu faire. Soit ! Y a-t-il, Mesdames, Messieurs, un chef idéal en aucune Eglise, en aucun Etat ? Y aurait-il jamais un chef idéal ? Je n'ai pas encore vu ce phénomène.

Nous autres, les positivistes anglais de Newton-Hall, nous n'avons pas pu suivre toutes les opinions journalières émises par M. Laffitte, sur une immense variété de questions pratiques et secondaires ; mais nous sommes profondément convaincus qu'aucun positiviste Anglais, Français, Espagnol, Brésilien, ni même Hindou, ne pourrait le remplacer, qu'aucun de nous n'a rendu au Positivisme la millième partie des services qu'a rendus M. Laffitte, pendant ces quarante dernières années. D'ailleurs, l'avenir de la *Religion de l'Humanité* dépend de l'union, de la loyauté, du dévouement des groupes nationaux que M. Laffitte a si solidement organisés.

Cette solidarité des groupes nationaux, dans le Positivisme, n'est pas un accident, n'est pas un moyen d'agir tout à fait secondaire. C'est l'idée-mère de la *Religion de l'Humanité*. Le caractère occidental du Positivisme est le plus précieux legs que nous a laissé le génie d'Auguste Comte. La religion se réduit à un mesquin pédantisme de secte, là où elle se fait *nationale* —

au lieu de rester pleinement humaine. On ne s'imagine pas que la science puisse se développer en restant simplement nationale, non plus que la philosophie, non plus que l'esthétique ou la morale. Toutes les quatre doivent s'élever au-dessus des frontières nationales, si elles sont vraiment dignes d'être acceptées par l'Humanité.

Encore moins, j'ose le dire, une Religion véritable ne peut s'attribuer une forme nationale. Une *religion nationale* n'est autre chose qu'un *cri de guerre* d'une tribu primitive d'un Dieu des Juifs, des Phéniciens de Tyr ou de Carthage, des Scandinaves ou des Polynésiens. La *Religion de l'Humanité* arborant un drapeau national — ce serait un contre-sens, une trahison, un suicide.

Vous ne penserez pas, mes chers confrères, que je suis capable de déprécier l'œuvre indispensable et l'indélébile sentiment de nationalité. Le patriotisme bien entendu est un des plus nobles sentiments de l'Humanité ; et les positivistes repoussent cette affectation de nos cosmopolites, de nos anarchistes modernes, qui prétendent que l'amour de la Patrie est un sentiment usé, rétrograde, démodé. Bien au contraire ! on ne pourra jamais trouver de meilleurs patriotes que les positivistes, ceux qui sont dignes de leur Foi.

Sur nos murs à Newton-Hall nous avons même inscrit la belle formule du Positivisme : la Famille, la Patrie, l'Humanité ! Et dans notre recueil de chants religieux nous avons inséré la *Marseillaise*.

Mais la Patrie n'est pas seule dans cette formule. Elle vient après la Famille, et précède l'Humanité. Ni l'une ni l'autre n'est exclusive et ne peut remplacer aucune des trois. C'est une vraie hiérarchie, mais la supériorité reste évidemment à l'Humanité. Si la Famille est le berceau unique de la Morale, la Patrie est l'école essentielle de l'activité, comme l'Humanité est le centre indispensable de la Religion. Un dévouement exagéré à la Patrie qui pourrait affaiblir notre dévouement à la *Patrie universelle* du genre humain, à l'Humanité entière de tous les pays et de tous les siècles — qui pourrait dégrader la religion de l'Humanité pour la mêler aux vanités, aux haines, inséparables d'un patriotisme exclusif — cela serait un avilissement, une déchéance de la religion.

Dans le faible et modeste développement qui convient au Positivisme, encore dans sa seconde génération, à l'heure qu'il est, c'est un devoir d'insister, partout et toujours sur l'idéal suprême

de notre Foi, sur le côté religieux — sur l'Humanité, sur la vie spirituelle du *Grand-Etre*, dont chaque nation n'est qu'un organe passager et imparfait. L'immense synthèse planétaire qu'Auguste Comte a systématisée, formulée — plutôt qu'il ne l'a découverte — n'est pas, certes, au fond *seulement* une nouvelle science, une *politique reformée*, un *socialisme pratique* et moralisé.

Le Positivisme contient tout cela, il est vrai.

Mais, au fond, cette *synthèse définitive* est une *Religion*.

Et cette synthèse indispensable serait dissipée dans les nuages littéraires qui remplissent l'atmosphère, serait étouffée dans le tourbillon des luttes politiques si on s'avisait de la représenter au public, seulement comme une nouvelle sociologie ou un nouveau parti politique.

Vous comprendrez facilement que je n'ai pas la prétention de donner des conseils pratiques à mes confrères français sur ce qu'il faut faire, dans les conditions si compliquées de leur pays. Je me borne à vous expliquer le but que les positivistes anglais poursuivent et les difficultés qu'ils rencontrent.

Si ces difficultés sont grandes, le but est assez clair.

Depuis quarante ans, la Grande-Bretagne a fait des efforts continuels pour l'extension de son Empire colonial à un tel point que le territoire et les populations aujourd'hui compris sous le sceptre de la reine Victoria sont le double de ce qu'ils étaient, au commencement de son règne. Et les petites guerres qu'on a faites en son nom sont beaucoup plus nombreuses que toutes les guerres faites par toutes les autres nations de l'Occident.

Ces guerres et ces annexions de territoire ont été accomplies, pour la plupart, à cause de l'ambition coloniale excessive et elles ont produit naturellement une immense recrudescence des idées impériales et militaires.

Le résultat inévitable du *chauvinisme commercial* a été une réaction générale vers la théologie, le mysticisme, et l'égoïsme social, à tel point que nous avons vu nos aristocrates et nos petits bourgeois applaudir, au Transvaal, l'*ignoble farce* de quelques *flibustiers effrontés*.

Dans une telle situation, je puis vous assurer que jamais les *positivistes anglais* ne se sont compromis par un lâche abandon des principes d'une saine morale internationale. Jamais ils ne se sont laissés séduire par un vain appel à un soi-disant patriotisme.

Ils ont constamment combattu — j'ose le dire — dans la mesure de leurs modestes forces, cet *égoïsme national* qui glorifie



*tant de crimes internationaux.* Partout, ils ont protesté contre ces guerres faites par les forts aux faibles, sous des prétextes frivoles, avec une foi peu sincère, — soit aux Indes, en Chine, au Japon, au Mexique, sur le Nil, en Egypte, chez les Ashantis, au Matabéléland. Nous avons toujours défendu la cause des indigènes, si peu civilisés qu'ils puissent être, contre les attaques d'une ambition excessive, militaire ou financière.

Les prétendus intérêts de l'Empire britannique, non plus que les prétendues nécessités de tel ou tel parti politique, de tel ou homme d'Etat, n'ont jamais réussi à fermer nos yeux aux lois de la justice et de la morale. *L'oppression d'un peuple semi-barbare par un peuple civilisé, la spoliation des indigènes au nom du commerce et de l'industrie, l'esclavage voilé des noirs et des bruns, au nom du Christianisme, n'a jamais été justifié à nos yeux par la croyance banale et rétrograde que ces agressions augmentent la gloire de la Patrie, ou qu'elles sont indispensables à compléter la carrière de tel chef du parti politique.* Nous pouvons nous vanter seulement de très modestes forces, nous autres positivistes anglais, et j'avoue que nous ne nous sommes pas toujours très bien servis de celles que nous avons — mais je puis affirmer que nous nous efforçons constamment de mettre au premier rang le côté religieux du Positivisme et de proclamer l'Humanité au-dessus de toutes les nations, de tous les partis, de tous les hommes — même quand la nation nous est la plus chère, ou quand le parti a une grande œuvre à effectuer, quand l'homme nous paraît être un grand génie ou un noble caractère.

Messieurs, je parle seulement pour l'Angleterre et pour les positivistes anglais.

Le rôle de la France, je le sais bien, est tout-à-fait différent de celui de l'Angleterre. Selon moi, c'est un rôle plus normal, plus systématique. La France possède un immense et riche territoire au milieu de l'Europe, avec une population homogène et concentrée. Elle n'est pas entraînée, comme l'Empire britannique, à se brouiller continuellement avec nombre d'indigènes barbares.

Au moment où j'écris, cependant, trois de ces petites guerres sont en activité.

Mais quoique, pour des positivistes français, ce ne soit pas un devoir *continuel* de protester contre des pillages commerciaux, faits au nom de l'honneur national, néanmoins les positivistes en France, et de même les positivistes de toutes les parties du monde, doivent coopérer à l'avènement d'un véritable *Pouvoir*

*spirituel* qui s'efforcera, partout, de moraliser le *Pouvoir temporel*.

Pour moraliser le Pouvoir temporel — c'est-à-dire les gouvernements, la législation, le suffrage universel — il faut être indépendant. Et quand je dis *indépendant*, je veux dire libre du moindre soupçon de complicité avec aucun parti politique ou de servitude à l'égard d'aucun homme d'Etat.

*La femme de César*, disait-on autrefois, *doit être non seulement innocente, mais au-dessus de toute calomnie*. Or, la Religion, qui voudra dompter les ambitions des politiciens, l'égoïsme des industriels et les caprices de la démocratie, devra prouver son détachement incontestable de toutes les ambitions, de tout égoïsme, de tout parti pris. *La religion de l'Humanité* ne sera pas moins *spirituelle* (dans le vrai sens de ce mot) que la religion soi-disant catholique. Par *spirituelle* je veux dire dévouée aux choses intellectuelles, morales, *affectives* et non pas aux choses matérielles. *La religion de l'Humanité* ne se retirera pas dans une solitude d'ermite, ignorante du monde, dédaigneuse des activités humaines. Bien au contraire ! Elle les comprendra parfaitement, elle s'y intéressera, elle les jugera, elle les conseillera. Mais jamais elle ne s'y mêlera. Jamais elle n'en tirera un profit ; jamais elle ne sera leur partenaire.

Ce qui me soutient dans la tâche périlleuse que j'ai entreprise, au risque de fatiguer mon auditoire par l'emploi d'une langue étrangère, que je connais mal, c'est que ma présence aujourd'hui, dans cette réunion annuelle, est une preuve décisive du lien étroit qui unit les Positivistes anglais à leurs confrères français. Tant que cette étroite alliance durera, le développement du Positivisme est assuré. Depuis 30 ans, j'ai plaidé en débutant dans un livre sur la *Politique Internationale*, en faveur de l'alliance anglo-française comme la seule garantie permanente de la paix et du progrès en Europe. J'ai soutenu cette idée pendant toute l'ère bismarkienne (cette ère de fer et de sang), pendant la guerre de 1870, pendant la question d'Egypte, jusqu'au jour actuel, au moment même où cette alliance *indispensable* paraît pourtant plus compromise que jamais !

Les différences entre le caractère, les forces, les aptitudes, les intérêts matériels des deux grandes nations constituent, même, l'importance d'une entente cordiale entre ces deux peuples si puissants, si fiers, si largement étendus sur la planète, et au fond, passez-moi le mot, Messieurs, tous les deux si généreux. Le dualisme, le contraste, l'équilibre qui s'établissent, quand ces

deux grandes puissances sont d'accord forment la meilleure garantie que leur politique commune n'aboutira jamais à un égoïsme national, à une menace pour les voisins plus faibles. Une alliance anglo-française ne pourra jamais couvrir une intrigue d'ambition, mais elle sera toujours une coopération vers la civilisation générale.

Dans l'avenir du Positivisme cette alliance de nos deux groupes est encore plus nécessaire et sera encore plus féconde, que dans la politique nationale. Le Positivisme est mieux organisé en France et en Angleterre que dans les autres pays.

Il y a beaucoup plus de communications, de connaissance mutuelle, permettez-moi de dire, plus de sympathie même entre les positivistes français et les positivistes anglais. Nous représentons les deux groupes de la vieille garde de l'Armée de Salut — de salut terrestre, bien entendu. Nous avons, l'un et l'autre, des différences essentielles, des moyens, des traditions, des habitudes, des pratiques caractéristiques, qui proviennent des circonstances, de nuances nationales, et même personnelles.

Nous avons beaucoup à apprendre, à enseigner réciproquement.

En France le Positivisme a un système d'enseignement populaire plus fort et plus suivi, je pense, que celui que nous avons en Angleterre — ce qui est naturel — vu l'éclatante supériorité et l'immense savoir de M. Laffitte, comme professeur.

En Angleterre, le culte, les célébrations solennelles et les réunions familiales, sont plus développés, peut-être, que chez vous. Il y a de faibles groupes locaux en Angleterre, vous le savez, dans lesquels le culte et les célébrations formalistes sont trop exagérées — ou plutôt dans lesquels il n'y a rien autre — ce qui est absurde — mais c'est une quantité négligeable. A Newton-Hall et à Manchester, la religion de l'Humanité a développé un culte tout à fait spontané et naturel. Il a surgi graduellement, et presque à notre insu, du milieu du groupe, sans la moindre initiative de notre Comité ou des conférenciers. Il a été institué par les plus jeunes, par la majorité ouvrière, pas les femmes.

Par exemple, nous avons fait un recueil des *Chants positivistes* analogue aux hymnes des églises chrétiennes — mais dépourvu de tout caractère catholique, ou même théologique. Ce recueil contient les poèmes les plus divers, depuis la Bible jusqu'à la *Marseillaise*, depuis les cardinaux jusqu'à Goethe et Carlyle. Il y a aussi des chants spéciaux composés par nos confrères pour les sacrements positivistes. Ce recueil a été fait par une femme, M<sup>me</sup> Harrison.

Je ne prétends pas que cette pratique soit très importante; je ne demande pas qu'on l'introduise en France. Je constate seulement le fait qu'en Angleterre le Positivisme a surgi spontanément comme une réforme religieuse plutôt que comme une réforme politique.

Il me paraît qu'en France les positivistes entrent plus directement dans la politique, et sont plus directement liés avec des hommes d'Etat que partout ailleurs.

En Angleterre, notre *Revue Positiviste* porte, en tête, cet avis — qu'elle est indépendante de tout parti politique.

En revanche, le Positivisme anglais entre plus librement dans la littérature générale et dans les débats philosophiques. Il y a des différences secondaires qui ne méritent pas d'être appréciées. Je n'ai pas indiqué ces différences nationales.

Au fond, mes chers frères, les différences, les nuances qu'on peut signaler entre les positivistes français et anglais sont d'une très petite importance. Le principal est que nous sommes solidement unis par une alliance supérieure même à la politique officielle des deux nations, c'est que nous sommes résolus de maintenir cette alliance inébranlable, que nous sommes dévoués, par une loyauté profonde, au même Chef vénéré — ce chef qui, depuis près de quarante années, a si bien continué l'œuvre philosophique et sociale qu'Auguste Comte a fondée. Je suis heureux de lui rendre hommage, dans cet *appartement* — le saint berceau du Positivisme — qui aujourd'hui (grâce à ses efforts), est devenu la propriété perpétuelle de ceux qui honorent la mémoire du plus grand penseur de ce siècle — le fondateur de la *Religion de l'Humanité*.

*Extrait du journal La Paix, du 6 septembre 1896.*

---

## II. — GROUPE POSITIVISTE BORDELAIS

DISCOURS DE M. MIGNONEAU (le 5 septembre 1896).

Mes chers confrères.

Nous communiquer, en ce jour, nos idées réciproques sur des sujets d'ordre général, c'est nous inspirer d'Auguste Comte, ces sujets ayant constamment été l'objet des méditations du fondateur du Positivisme, de celui qui a le plus contribué à la décou-

verte des lois de la *sociologie* et de la *morale*. On ne se fait pas, en général, une idée de l'importance de ces lois qui entreront un jour dans le programme d'une instruction que nous appellerons, si l'on veut, intégrale. Tous les jours dans nos entretiens on nous montre, et avec raison, la supériorité de ces esprits d'élite passés maîtres en astronomie, en physique, en médecine, etc., et faisant la gloire des nations qui les ont vu naître. Mais nous ne croyons pas dénuées de force nos objections relatives à l'insuffisance ou aux lacunes de l'instruction reçue par ces maîtres s'ils n'ont pas eu des notions générales sur les dites sciences suprêmes. Nous admettons cependant que l'art de gouvernement peut être inné chez certains hommes politiques contemporains comme il l'a été chez de grands hommes dans le passé. Mais à cet art spontané, ou acquis par l'expérience, serait précieuse aussi l'adjonction de données fondamentales tirées de ces sciences *sociale* et *morale*.

Il ne faut pas cesser, chers confrères, de faire entendre que toute connaissance positive acquise par l'individu, vivant en société, est profitable à tous. L'individu amélioré devient alors, sans le vouloir, sans le savoir, un agent du pouvoir spirituel ou moral. Or, nous croyons que de ce pouvoir normal de l'avenir, *systématiquement organisé*, émaneront surtout les solutions vainement attendues d'autres institutions. Sciemment ou non tous les efforts des hommes ayant eu le *progrès pour but* ont tendu à constituer ce pouvoir, qui hélas! ne se peut décréter ni être créé par le vote d'une assemblée émanée de l'élection. Il a, du reste, été dans le passé à l'état d'ébauche plus ou moins accentuée. C'est ainsi que, sans remonter au delà des Romains, sous ce grand peuple, les légistes faisaient par leur influence morale très souvent contre-poids à l'arbitraire du pouvoir civil ou temporel. En outre, dès la constitution de la famille, la femme exerça toujours une action de même nature et plus ou moins grande sur la société. L'avantage qu'a le pouvoir moral sur l'autre c'est qu'il peut se dégager plus que celui-ci des irritantes questions des personnalités qui, depuis 1789 surtout, servent le plus souvent d'aliment unique à l'activité politique. Même il se produit ceci, c'est qu'habitué à croire à la vertu magique des moyens révolutionnaires pour la solution des questions sociales ou politiques, ceux qui sont activement mêlés aux luttes politiques tombent dans une indifférence fâcheuse, quand on ne leur met sous la dent que les discussions théoriques portant sur les réformes sociales, qui les passionnent relativement peu. Notre excellent confrère, M. Finance, a fait justement cette remarque dans son ouvrage si documenté sur les *Syndicats ouvriers aux Etats-Unis*.

Eh bien! en cet état actuel de l'opinion, même un personnel gouvernemental positiviste religieux ne saurait, je crois, se soustraire à l'emploi des procédés habituels de gouvernement. Tout au plus pourrait-il améliorer l'éternel empirisme lié à un grain de scep-

ticisme politique hautement avouable, qui accentue plus fortement dans l'âme de ceux qui sont pleins de l'avenir, l'amour de la Famille, de la Patrie, de l'Humanité.

Imitons souvent Montesquieu, s'il nous est permis d'employer en parlant de lui cette expression familière. Dans la préface de l'*Esprit des Loix* il se défend d'être désapprouvateur. Que l'on ne voie donc pas en ce que nous disons plus haut une critique qui serait déplacée des procédés ou opinions des chefs de partis. Nous apprécions les efforts surhumains qu'ils font, parfois, pour dégager du gros bon sens du public des indications ou aspirations n'étant pas en contradiction avec le sens commun du jour ou la marche sociologique des choses. Il y a même souvent tout profit, et Molière et Boileau en ont donné l'exemple, à s'inspirer des causeries des plus humbles, par sympathie d'abord, et pour voir souvent les choses comme elles sont. Il ne faut pas toujours se placer à un point de vue trop élevé.

Mais nous inclinons à ne pas croire, à l'encontre de l'opinion de beaucoup des meilleurs esprits de notre temps, que le régime de la démocratie doive être un idéal recommandable à un très haut degré. Nous sommes loin de méconnaître les services parfois immenses, rendus par les principes démocratiques ou ceux similaires de 89, mais la science et le régime républicain à son état normal ménagent aux Français, et à l'espèce humaine, d'autres destinées que celles qui seraient la conséquence des dits principes, lesquels n'ont eu qu'une utilité passagère comme nos vêtements du second âge.

Beaucoup d'autres dogmes, d'autres formules, sont également peu de circonstance. Nous estimons, par exemple, que la concentration entre républicains de la veille serait très facile, si seuls ceux qui le sont depuis 1848 ou 1855, ou même seulement depuis 1865, se concentraient. Mais nous serions bien peu nombreux ! Du reste, comme cela est secondaire aujourd'hui que seule la République est possible, chers confrères, et comparé aux intérêts de notre patrie qui sont liés à ceux de la Société !

Vainement, croyons-nous encore, on tenterait d'employer en France le classement des partis anglais, dont les institutions, datant du pacte de Runnymede de 1215, et les habitudes sont sans analogie avec les nôtres, qui s'y adaptent difficilement. Mais une réunion déterminée par des idées communes, toujours démontrables, toujours vérifiables, serait à l'abri de critiques sérieuses. Ainsi que le dit notre Maître vénéré, dans sa circulaire de cette année : « De plus en plus, se prépare la prépondérance de cette grande opinion, que c'est seulement dans la science, dans la science étendue jusqu'à la sociologie et à la morale, que l'on peut trouver les bases du ralliement autour d'une doctrine commune..... »

Sociologie et morale sont donc, d'après le Positivisme, les sciences suprêmes. Auguste Comte dans celui de ses ouvrages, qui a été la

plus la, la *Philosophie positive*, avait compris dans la sociologie la morale, qui en formait un des chapitres. Mais postérieurement il en détacha celle-ci pour en former une 7<sup>e</sup> science. Il comprit, après des méditations approfondies, que la connaissance de l'homme moral exigeait une *étude distincte*. La hiérarchie abstraite primitivement de 6 sciences dans la Philosophie positive fut donc portée à 7. Nous insistons pour ces remarques auprès des personnes qui goûtent seulement la *Philosophie positive*, ouvrage dans lequel on a pris des extraits pour les programmes, universitaires. On ne voit pas assez dans cet ouvrage l'utilité des efforts faits par l'homme pour s'améliorer, et le bien physique et moral qui en résulte pour lui et la société, qui ne devrait pas vivre uniquement de critiques, de commérages et de cancans. L'étude de l'homme individuel, de l'homme moral, a été abordée par de très grands hommes, notamment par les plus célèbres du troisième quart du XVIII<sup>e</sup> siècle : Hume, Diderot, d'Holbach, etc. Mais cela était prématuré avant les découvertes de Comte. Ces grands écrivains n'avaient que peu ou pas de notions sur les lois sociologiques, ou lois d'évolution de notre espèce, qu'il fallait connaître préalablement à la connaissance de l'homme. Ajoutons encore que les seuls penseurs qui aient quelque titre pour être qualifiés de *sociologistes avant la lettre* ont été très peu nombreux. Les principaux furent Aristote, Rabalais, Bossuet (mais celui-ci s'était placé au point de vue catholique exclusif), Vico, Montesquieu, Turgot, Condorcet. Il n'est pas besoin d'ajouter que les ouvrages de tous ces auteurs demandent à être corrigés à la lumière des œuvres d'Auguste Comte. En résumé, Auguste Comte, bien qu'il ne fût pas impeccable, ni parfait, est peut-être celui qui de tous les humains a le mieux indiqué les voies et moyens pour arriver au meilleur fonctionnement des cervelles humaines.

Salut et fraternité.

pour le Groupe positiviste Bordelais :  
E. MIGNONEAU.

---

## NOUVELLES

---

Le 30 décembre, à 8 heures 1/4 du soir, 10, rue Monsieur-le-Prince, célébration de la *Fête universelle des Morts* : discours de M. Raphaël Petrucci.

Le 1<sup>er</sup> janvier, à 3 heures de l'après-midi, 10, rue Monsieur-le-Prince, célébration de la *Fête de l'Humanité* : discours de M. Ch. Jean-nolle.

---

# BULLETIN DE BELGIQUE

---

## L'UNIVERSITÉ NOUVELLE ET L'UNIVERSITÉ LIBRE.

### UN DISCOURS DE M. HECTOR DENIS SUR LA MISSION SOCIALE DE LA PHILOSOPHIE POSITIVE

Dans deux numéros antérieurs de cette Revue, nous avons apprécié le mouvement positiviste en Italie, et dit son importance, en même temps que nous reproduisions les statuts de la *Société positiviste de Rome*.

Si nous jetons aujourd'hui un coup d'œil sur la Belgique, nous devons constater immédiatement que l'influence de la Philosophie positive y est toujours très grande ; et qu'en dehors même des groupements orthodoxes comme le *Cercle positiviste de Mons*, etc., des hommes remarquables, à divers titres, se sont plus ou moins directement réclamés de nos doctrines. Nos confrères se souviennent sans doute des excellents rapports que nous avons eus avec M. César de Paepé, et il est inutile de rappeler la sympathie que M. Hector Denis a toujours affirmée envers le Positivisme. L'Université libre a toujours été très ouverte à nos doctrines ; à la suite de divergences intérieures qu'il ne nous appartient pas d'apprécier, à côté de l'Université libre s'est fondée l'Université nouvelle. M. de Greef, dont les travaux sociologiques ont été si remarquables, a continué dans cette nouvelle organisation les traditions de la *Philosophie positive*. Il s'en inspire directement dans son programme, dans l'aspect occidental qu'il a essayé de donner à l'Institut des hautes études en y concentrant l'enseignement des savants les plus justement célèbres. Cette courte citation du programme le montrera mieux que tout commentaire : « S'inspirant « de la réflexion d'Auguste Comte qu'une conception quelconque « ne peut être bien connue que par son histoire, l'on s'efforcera



« de compléter l'enseignement dogmatique de chaque science par  
« un enseignement historique correspondant.

« Un cours de Philosophie générale des sciences sera consacré  
« à l'étude des rapports réciproques des sciences entre elles, des  
« méthodes et des résultats généraux que chacune d'elles fournit  
« aux autres. Un cours d'histoire générale des sciences retraçant  
« l'évolution d'ensemble du savoir positif abstrait devra compléter  
« cet enseignement. »

On voit combien l'évolution de l'enseignement tend à amener des préoccupations supérieures à développer une activité intellectuelle plus générale. De plus la sociologie tient une grande place dans la Philosophie générale et dans le point de vue sous lequel sont enseignées les diverses sciences, on découvre dans ces si intéressantes tentatives un mouvement d'idée qui conduit à la constitution d'un esprit occidental sous la haute inspiration des méthodes positives.

Nous avons parlé plus haut de M. Hector Denis et de l'Université libre. Ses tendances ne sont pas différentes, comme le prouve le dernier discours électoral prononcé par M. Hector Denis à la séance publique de rentrée de l'Université, discours que nous sommes heureux de reproduire ci-dessous, sans croire qu'il y ait lieu d'insister sur les légères divergences de vues qu'il manifeste, et que chaque positiviste est capable d'apprécier et de juger. On y verra en quels termes il est rendu hommage à notre maître M. Pierre Laffitte et aux efforts de ses disciples. R. P.

#### DISCOURS DE M. HECTOR DENIS, RECTEUR

##### *La mission sociale de la Philosophie positive*

I. Je me propose de tracer à grands traits la mission que j'attribue, dans la crise morale et sociale actuelle, à la philosophie positive ; j'entends par là celle qui, empruntant ses éléments à l'observation et à l'expérience seules, s'applique à coordonner tout l'ensemble des connaissances positives sur le monde, l'homme, la société, et à en tirer des déductions pratiques. Il est du devoir de toute philosophie digne de ce nom de s'interroger devant un si redoutable problème et de s'efforcer d'y répondre. Partout le regard attristé rencontre l'antagonisme. Dans la première moitié du siècle, les philosophes, Saint-Simon par exemple, annonçaient la succession définitive d'une phase industrielle et pacifique à la phase guerrière ; Auguste Comte lui-

même, tant la prévision des plus fermes penseurs est limitée, écrivait, en 1843, que l'époque est enfin venue où la guerre sérieuse et durable doit totalement disparaître chez l'élite de l'Humanité; et voici que cette élite rétrograde vers ce que Herbert Spencer, à son tour, appelle le type militaire des sociétés. Les économistes, forts des progrès extraordinaires de la division du travail entre les peuples et de leur coopération de plus en plus active à la vie de l'ensemble, saluaient l'incorporation définitive de toutes les Economies nationales à l'Economie du monde, et voici la réaction économique grandissante qui rejette les peuples dans le particularisme et glace les espérances des amis de la liberté. Cette réaction est inséparable de la dépression des prix, et l'ébranlement qu'elle communique à l'organisme économique retentit jusque dans l'ordre moral. Plus profondément apparaît la crise sociale; la lutte des classes est non seulement dans les intérêts, mais dans les conceptions de l'ordre des sociétés, et l'idéal social qu'emporte avec lui le prolétariat dans sa sécession tend à se séparer à ce point de l'état présent que la continuité de l'histoire semble à chaque moment près de se rompre.

Les parties du savoir humain qui touchent aux intérêts les plus essentiels des sociétés nous présentent le tableau de leurs déchirements. L'économie politique et le socialisme projettent dans la sphère des idées les antagonismes des classes. La crise que traverse la philosophie morale a été retracée en traits saisissants par Beaussire et Fouillée (1); ce drame de la pensée morale retentit tout entier dans l'œuvre profonde et émouvante de philosophe et de poète que nous a laissée Guyau. Tarde a décrit l'anxiété, l'angoisse universelle des consciences éclairées, et ce qu'il a appelé la déséquilibration des âmes (2). En effet, la puissance d'idéal qui, dans la première moitié du siècle, s'épanouissait en systèmes philosophiques et sociaux pénétrés des plus hautes aspirations de l'Humanité, est trop souvent aujourd'hui refoulée au fond de l'âme humaine. L'idéalisme optimiste a gravi les premiers échelons du dix-neuvième siècle, le pessimisme en redescend les derniers. Il est comme un renoncement à l'action qui vient à la suite des grandes déceptions, des chutes de l'idéal,

(1) Emile BEAUSSIRE, *les Principes de la morale*; Alfred FOUILLÉE, *Critique des systèmes de morale contemporains*.

(2) G. TARDE, *Etudes pénales et sociales. Crise de la morale et crise du droit pénal*.

et va jusqu'à l'abnégation surhumaine, pendant que le sentiment de cette même impuissance sème ailleurs la révolte violente, inhumaine ; ailleurs encore, l'idéal se réfugie dans les formes multiples et si riches, aux époques d'affaissement, de ce que Paulhan a appelé, dans une pénétrante analyse, le mysticisme moderne, et dont l'expression dernière est la dépravation de l'idéal dans l'amour du mal (1).

Ces déchirements et ces reculs ne sont pas à faire désespérer de l'Humanité ; nous sommes frappés de l'aspect critique de cette phase de son développement ; nous sommes moins attentifs à son aspect organique. Assurément, le travail à la fois formidable et douloureux du siècle n'a pas été stérile, les matériaux d'une reconstitution s'accumulent, et ce n'est pas en vain que ce bonheur nouveau, l'amour de l'Humanité, dont parle Littré, a glissé parmi les hommes. Mais déjà, au lendemain de la Révolution, Saint-Simon croyait rapprochée de lui la solution de ce grand problème d'une réorganisation spirituelle et temporelle qu'il proposait au dix-neuvième siècle. La transition se prolonge et vient jusqu'à nous, et il semble qu'elle doive aller au-delà de nous, plus laborieuse et plus grosse de périls. C'est pourquoi le besoin le plus impérieux de la société moderne est de retrouver une suffisante convergence dans les idées, les volontés, pour qu'un même but général à atteindre se trace devant les esprits, et que, dans les transformations inévitables, l'histoire échappe à de trop profondes fluctuations.

La société reste *sollicitée* par la direction théologique, par la direction métaphysique et par la direction purement scientifique ; la première, d'après laquelle le monde et l'Humanité sont soumis à une volonté supérieure ; la seconde, qui en rattache l'explication ou la direction à des conceptions de l'esprit dépassant l'ordre phénoménal ; la troisième, par laquelle toute conception reste contenue dans cet ordre : tout vient de l'expérience et tout y retourne. Partout la préoccupation de reconstituer l'unité mentale et morale du monde agite les plus nobles esprits ; mais les doctrines qui réussiront à y parvenir doivent être assez larges et assez stables pour recueillir l'adhésion universelle, assez puissantes pour envelopper et contenir tous ses antagonismes sociaux, assez fécondes pour assurer tous les progrès et toutes les légitimes satisfactions de l'idéal, assez fermes pour en paralyser les écarts, en empêcher les reculs.

(1) PAULHAN, *le Mysticisme moderne*.

L'Eglise voudrait atteindre ce grand but, mais quelle abdication n'exige-t-elle pas de l'esprit humain ? Qu'on lise, par exemple, le livre de l'un de ses plus illustres représentants, M. Ch. Périn, sur l'ordre moral international. L'idée seule d'un pareil objet d'étude révèle un esprit supérieur : les conditions de l'unité morale du monde, de l'équilibre des nations ; ajoutez l'étendue des connaissances, l'ampleur et l'éclat du style, la sincérité d'une conviction invincible qui portent à admirer l'écrivain. Mais sa pensée maîtresse est que l'homme est par lui-même absolument et irrémédiablement impuissant à s'élever à la justice ; il ne conçoit la morale et le droit que comme le commandement d'une volonté divine, il n'admet d'autre interprète de ce commandement que l'Eglise, d'autre lien stable entre les nations que celui que l'Eglise nouera elle-même. Aussi, avec une inflexible logique, rejette-t-il tous les efforts de l'esprit humain pour s'élever à la Conception de la morale sans les lumières de la foi. Grotius avait affranchi le droit naturel de toute théologie ; Puffendorf, plus nettement encore après lui. Les conceptions de ces penseurs et toutes les tentatives pour constituer un droit naturel qui ont suivi, toutes les théories historiques du droit qui se sont détachées de l'idée d'une nature humaine immuable, tous les efforts de l'école utilitaire, de l'école évolutionniste, de l'école positiviste, comme les plus grandes écoles métaphysiques, tout est condamné comme atteint d'une infirmité indéfectible. Baser la morale sur ce seul respect de la personne humaine et de la personnalité collective des nations, c'est pour lui la plus monstrueuse nouveauté de l'histoire. La conclusion s'impose alors d'elle-même : elle est dans un retour universel à la foi, entraînant la reconstitution même de l'autorité spirituelle et temporelle de l'Eglise ; devant la nécessité d'un tel retour de l'histoire, le philosophe catholique doute lui-même que son idéal puisse jamais être atteint (1). L'Eglise aboutit aux mêmes conclusions dans la question sociale ; en reportant ses préoccupations vers les intérêts terrestres et les conditions du travail, elle contribue certainement à atténuer nos antagonismes économiques, mais la solution dernière de la question sociale est toujours réservée par elle à son autorité dogmatique : impuissante à lui rendre l'universalité, l'Eglise reste ainsi un élément irréductible de l'antagonisme général.

(1) Charles PÉRIN, *l'Ordre moral international*. Voy. surtout le livre II, ch. VII et la conclusion.

La philosophie métaphysique ramènera-t-elle dans les esprits la convergence nécessaire à l'accomplissement du but social ? Sortira-t-elle elle-même de la redoutable crise où elle est engagée ? Sa grandeur est d'avoir voulu donner des bases indestructibles à la moralité humaine, mais elle les cherche au-delà des limites de l'expérience. Fouillée, dans sa puissante critique des systèmes de la morale, a embrassé les principales écoles métaphysiques contemporaines, criticiste et néo-kantienne, moniste, spiritualiste, dogmatique, mystique ; on cherche vainement dans l'étude de ces systèmes une loi d'évolution qui assurerait la prédominance définitive à l'une des conceptions métaphysiques, ou les résoudrait dans une synthèse (1). On voit bien, par exemple, comment Renouvier et Schopenhauer procèdent l'un et l'autre de Kant : Renouvier, rejetant la distinction du phénomène et de la chose en soi pour n'admettre que l'ordre phénoménal, mais donnant encore au commandement moral l'empreinte d'un dogmatisme absolu ; Schopenhauer, maintenant avec Kant une liberté absolue dans le monde suprasensible pour en faire rayonner dans le monde sensible une sorte de système de prédestination, et ne permettre à la liberté de se ressaisir que dans l'anéantissement de la volonté de vivre. Mais on ne voit pas, de Kant à ces grands disciples, de loi d'évolution exprimant une tendance à l'unité de la pensée morale, une promesse d'apaisement définitif pour les consciences troublées (2).

Loin d'admettre qu'une telle loi existe, Fouillée s'applique à montrer les contradictions de ces systèmes, le criticisme se tournant en foi, le spiritualisme se perdant dans des mystères, le monisme, le mysticisme aboutissant à un stérile dogmatisme ; et ce qui est plus redoutable encore, c'est l'impuissance finale des conceptions transcendantes à nous rendre plus moraux ou meilleurs. La conclusion décisive, la seule qu'il faille recueillir en ce moment, c'est qu'aucune de ces observations dogmatiques sur la réalité de principes supérieurs à l'ordre des phénomènes physiques ou psychiques, sur l'essence intime des êtres, sur ce que peut être en soi la volonté, abstraction faite de l'ensemble des conditions observables de l'acte volontaire, sous la forme absolue du commandement moral, ne peuvent acquérir une

(1) FOUILLÉE, *Critique des systèmes de morale contemporains*, surtout les livres III et V et la conclusion.

(2) Cf. Ch. RENOUVIER, *Science de la morale* ; Fréd. PILLON, *l'Année philosophique*, 1<sup>re</sup> année ; Morale ; A. SCHOPENHAUER, ses *Essais sur le libre arbitre et le Fondement de la morale*.

autorité sociale, ressaisir le gouvernement de l'universalité des consciences, et c'est là le point de vue qui me domine ici.

L'obstacle infranchissable à cette destination sociale de la philosophie métaphysique, c'est la relativité même de la connaissance humaine. Placé aux limites du domaine accessible à l'esprit humain, le philosophe peut, dans l'anxiété de son âme ou des audaces de son génie, interroger l'absolu ; mais quel reflet en pourra-t-il projeter dans la conscience collective ?

Ainsi nous percevons en nous directement certains états de sentiment, de connaissance, de volonté, auxquels nous donnons le nom de phénomènes de conscience ; l'observation objective nous les montre associés à certaines conditions de structure et d'activité nerveuses, en relation avec certaines conditions du milieu externe. Nous pouvons découvrir des relations constantes de ces états entre eux, avec la structure et l'activité nerveuses ou avec les agents du milieu extérieur, c'est-à-dire les lois de ces phénomènes de conscience ; la connaissance scientifique ne va pas au delà. La chaîne de ces phénomènes de conscience qui forme la trame de notre vie spirituelle est-elle soutenue par une substance spirituelle unie à une substance corporelle absolument distincte ? Y a-t-il une substance unique, la matière ou l'esprit ? Ou faut-il chercher une conciliation doctrinale dans une unité substantielle dont l'activité nerveuse et l'activité psychique seraient deux modalités ? Ces hypothèses et d'autres encore sur l'*en soi* de l'esprit, matérialiste, spiritualiste, panthéiste, moniste et toutes les conceptions qu'on y rattachera sur la liberté, la loi, l'obligation, la fin morale, par cela même qu'elles nous transportent au delà des limites de l'expérience, ne peuvent assurer la convergence définitive des esprits ; elles sont livrées à une critique toujours renaissante et à une funeste instabilité sociale.

La philosophie à laquelle l'illustre Auguste Comte a donné le nom de positive a pour fondement la relativité même de nos connaissances, elle n'embrasse que les phénomènes et leurs lois. En cela, elle n'est point l'œuvre de Comte, mais celle d'une puissante lignée de penseurs, comme Mill, Spencer, Roberty après Comte lui-même, l'ont montré (1). Celui-ci n'a fait, en étendant

(1) A. COMTE, *Philosophie positive*, 2<sup>e</sup> édit. Voy. la 1<sup>re</sup> leçon, t. I<sup>er</sup> ; la 47<sup>e</sup>, t. IV, et la 56<sup>e</sup>, t. VI, surtout p. 193 et suivantes : Discours sur l'ensemble de l'esprit positif dans son astronomie populaire ; LITTRÉ, *A. Comte et la philosophie positive*, 1<sup>re</sup> partie, ch. III à IV ; J.-S. MILL, *Auguste Comte et le positivisme* ; Herbert SPENCER, *Reasons of dissenting from A. Comte* ; E. DE ROBERTY, *La Philosophie du siècle*, ch. III et VII.

définitivement le principe aux phénomènes sociaux, que donner une unité imposante à la science. C'est la portée sociale d'un tel principe qu'il faut tout d'abord marquer. Si je ne puis rien affirmer de ce qui est ou peut être au delà des phénomènes, je reconnais par là même une limite naturelle à mon pouvoir sur la pensée, sur la volonté des autres; les bornes de mon savoir démontrable fixent celles de mon droit personnel, de mon égoïsme légitime. De même, si je ne puis rien nier d'une manière absolue, s'agit-il des conceptions de mes semblables les plus antipathiques à l'état présent de la raison humaine, je trouve là encore une limite à mon égoïsme qui s'arrête devant la nécessité du respect d'autrui. Comte, Littré, et après eux Proudhon, ont mis en lumière l'efficacité morale du principe de la relativité des connaissances (1). Fouillée l'a admirablement exprimée quand il a dit : « La science et les bornes de la science fondent le droit comme tel. » Il entend dire par là que le respect mutuel de la pensée, de la conscience, de la personne est le corollaire naturel de notre incapacité générale à rien nier, à rien affirmer de l'absolu.

Le principe auquel s'enchaîne la philosophie positive assure un fondement solide à la tolérance, à la justice; en excluant définitivement les antagonismes irréductibles, elle donne donc un premier gage à l'harmonie sociale, le plus essentiel de tous.

La philosophie positive est par-dessus tout une direction de l'esprit; les contradictions ou les défaillances de ses disciples ne peuvent l'atteindre; l'œuvre personnelle d'Auguste Comte, si puissante qu'elle soit, ne s'incorpore à la philosophie positive que dans la mesure où il a lui-même la réserve que commande la relativité du savoir humain. En cédant à un entraînement de son génie à identifier l'Humanité avec l'Absolu, il dépasse la science, comme Herbert Spencer, en donnant à l'inconnaissable pour attribut la puissance. Le doute est ici seul légitime pour l'esprit positif.

C'est dans le domaine du savoir expérimental que se réalisera au plus haut degré la convergence des esprits. C'est là que, par une critique incessante, se forme peu à peu le corps des vérités démontrables, patrimoine commun du genre humain. S'il n'était permis de douter de la loi de Newton, a dit Mill, l'esprit humain ne pourrait la tenir pour vraie en toute certitude. Combien cette

(1) A. COMTE, *Discours sur l'esprit positif*; LITTRÉ, *Conservation, Révolution et Positivisme*, 2<sup>e</sup> édit, Voy. aussi l'*Essai sur la philosophie positive* contenu dans la 1<sup>re</sup> édit.; P.-J. PROUDHON, *la Justice*, surtout VII<sup>e</sup> étude : *Les Idées*.

remarque de Mill a de portée ici ! Ces vérités ont pour appui le plus solide une invitation constante à les combattre, adressée au monde entier (1).

Tout ce qui résiste à cet effort permanent de dissolution réunit finalement l'adhésion spontanée de tous les hommes les plus divers, les plus éloignés les uns des autres ; les raisons individuelles se fondent sans aucune contrainte par leur accord logique, progressif, dans une raison collective soustraite à l'absolu.

Ces éléments du savoir expérimental servent à construire l'édifice de la philosophie positive. En effet, elle en classe les diverses parties, non arbitrairement, mais d'après la nature même des choses. La classification des sciences est le second élément de cette philosophie. La conception organique de la société humaine, d'une existence collective qui se développe dans le temps, associant toutes les générations à une œuvre commune et grandiose, la direction morale fondamentale qui en dérive, ce sont là les autres éléments essentiels de la philosophie positive. On les retrouve dans toutes les écoles qui se rattachent à Auguste Comte, comme un héritage commun, accepté de tous. Il me suffit pour montrer que la philosophie positive dirige tout le vaste système des connaissances humaines, fait converger toutes les énergies intellectuelles vers l'humanité, que c'est sur elle aussi qu'elle concentre les énergies morales, en préparant la réalisation progressive de l'idéal de l'humanité. Ainsi se justifie, à mes yeux, la destination sociale de la philosophie positive.

II. La philosophie positive fait concourir tout le savoir expérimental à l'explication de plus en plus complète et méthodique des phénomènes sociaux. Telle est la haute portée de la classification des sciences d'Auguste Comte. Il a placé les sciences dans un ordre donné par la complexité des phénomènes qu'elles étudient, c'est-à-dire que cette hiérarchie du savoir a son fondement dans la hiérarchie des phénomènes, elle n'est pas une pure création de l'esprit. Mathématiques et mécanique, astronomie, physique, chimie, biologie, sociologie, forment les termes de la série de Comte, correspondant à des agrégats de propriétés qui vont croissant en complexité. Au nombre et à l'étendue, objets des mathématiques, s'ajoute le mouvement dans la mécanique : un agrégat plus complexe est donné si, au nombre, à l'étendue, au mouvement, on joint la gravitation, objet propre de l'astrono-

(1) J.-S. MILL, *Essai sur la Liberté*.



mie. La gravitation forme le lien des phénomènes célestes et des phénomènes terrestres; à cette propriété, à toutes celles qui précèdent, s'unissent d'abord les propriétés physiques dans le monde inorganique : c'est l'objet de la physique; une propriété nouvelle, l'affinité, se manifeste entre des corps différents par leur composition élémentaire et jusqu'ici irréductibles; la chimie, plus complexe que la physique, forme la transition entre le monde inorganique et les corps organisés : dans ceux-ci les propriétés physico-chimiques sont associées à une propriété nouvelle, la vie. Stuart Mill et Bain ont légitimement, depuis Comte, fait ici, des phénomènes de conscience qui se produisent dans certaines classes d'êtres vivants et surtout chez l'homme, l'objet d'une science distincte marquant un nouveau degré de complexité, mais elle reste indissolublement unie à la science de la vie, et son vrai nom est physiologie psychique plutôt que psychologie (1); enfin, dans les phénomènes sociaux, une propriété sociale, l'action des générations passées et le concours des individus de chaque génération vient s'ajouter aux propriétés du monde inorganique et du monde organisé. Les termes de cette série des sciences se succèdent de telle sorte qu'ils se rapprochent, par des relations de plus en plus continues, de la science des sociétés. Toutes les sciences préparent à la science sociale, mais il faut faire un pas de plus encore et dire : *toutes les sciences sont les éléments d'une science unique, celle de l'humanité*. En les coordonnant, on dirige réellement toutes les forces mentales délivrées du tourment de l'absolu vers la connaissance et l'amélioration de la société.

Quand on se place au sommet de cet édifice des connaissances humaines, dans la science sociale, qu'en embrassant un à un les éléments qui concourent à la former, on redescend de degré en degré jusqu'aux limites du savoir, jusqu'aux propriétés les plus générales de la matière, on est frappé de la simplicité, de la grandeur et de la fécondité de cette partie maîtresse de l'œuvre d'Auguste Comte.

Les phénomènes sociaux sont soumis à des lois qui leur sont

(1) J.-S. MILL, *Auguste Comte et le Positivisme*; A. BAIN, *Logique*, vol. I<sup>er</sup>, Appendice. Voy. la controverse entre Mill et Littré dans *Auguste Comte et Stuart Mill*, par E. Littré et G. Wyruboff (1867). Sur la place de l'étude des phénomènes de l'esprit dans la hiérarchie des sciences, il n'y a pas de désaccord, l'opposition subsiste sur le point de savoir si les phénomènes de conscience forment légitimement l'objet d'une science distincte.

propres, puisqu'ils impliquent la coopération incessante des générations éteintes et d'un nombre immense d'individualités vivantes à la vie collective et au mouvement de l'histoire ; mais tout phénomène social dérive aussi du concours de deux facteurs irréductibles : le milieu dans lequel il s'accomplit, l'agent qui l'opère, l'homme individuel, et c'est là ce qui va le subordonner à un vaste système de lois qui iront en s'enchaînant et en décroissant de complexité jusqu'aux lois les plus générales des phénomènes observables. Le milieu extérieur, composé à la fois d'existences organiques et inorganiques, soumet directement le phénomène social aux lois des êtres vivants, et le soumet ensuite, en même temps que tous les êtres vivants, aux lois des phénomènes inorganiques terrestres, aux lois des phénomènes célestes qui contiennent les lois du nombre, de l'étendue, du mouvement. L'agent du phénomène social, l'homme, le subordonne aux lois des phénomènes de l'esprit, qui sont eux-mêmes subordonnés aux lois de la vie et à celles du monde inorganique, de telle manière que l'explication ultime du phénomène social renferme toutes les lois de l'univers. Toutes les classifications des sciences qui ont suivi l'œuvre de Comte, celles de Spencer ou de Cournot, malgré leurs différences apparentes ou réelles, sont des hommages à cette subordination des phénomènes (1). Celui qui voudrait voir s'animer le tableau de la philosophie des sciences abstraites, tracé par Auguste Comte, lira l'admirable description de la nature d'Alexandre de Humboldt. Contemporain d'Auguste Comte, en-

(1) Herbert SPENCER, *Classification des sciences*, trad. Réthoré, pages 77 et suivantes, développe cette idée au sujet des sciences concrètes. Dans leur évolution, les phénomènes se sont produits suivant l'ordre qu'elles présentent et l'explication scientifique de chaque groupe dépend de l'explication des groupes précédents. C'est le principe même de Comte. COURNOT, *Essais sur les fondements de nos connaissances*, classe les sciences théoriques correspondant aux sciences abstraites de Comte dans le même ordre. « Il est », dit-il, impossible de méconnaître la dépendance des sciences physiques vis-à-vis des mathématiques : les sciences qui ont pour objet la nature vivante supposent la connaissance des propriétés générales des corps ; ces sciences biologiques conduisent, par l'histoire naturelle de l'homme et la psychologie, à l'ensemble des sciences qui ont pour objet les lois de la nature morale de l'homme et de l'esprit humain. Enfin, les sciences qui ont pour objet l'organisation des sociétés en corps politiques ne peuvent venir qu'après celles qui traitent tant de la nature physique de l'homme que de sa nature intellectuelle et morale » (p. 269 et 270). Voy. déjà dans AMPÈRE, *Essai sur la philosophie des sciences*, 1<sup>re</sup> partie, l'admirable § 3 de l'Introduction, pages 11 et sui-

gagé dans la même direction philosophique, auditeur même de Comte, l'auteur du *Cosmos* a fait de son œuvre le commentaire vivant, et si je puis dire la face concrète de la philosophie positive; non seulement il a, pour la première fois, embrassé toutes les parties du milieu physique où se développent les sociétés humaines, mais ruinant définitivement les doctrines qui plaçaient la terre et l'homme au centre de l'univers, il va dans son œuvre, comme Comte, méthodiquement, du monde sidéral à la terre, du tableau du jeu complexe des forces physiques à celui de la vie, et s'arrête dans des pages sublimes au seuil de l'histoire de l'humanité. L'inspiration de Humboldt a passé dans les grandes œuvres de Houzeau et de Reclus (1).

Cette classification naturelle des sciences est un instrument puissant des progrès de la sociologie; elle guide le savant dans l'explication de toutes les classes de phénomènes. L'hygiène sociale et la démographie lui ont emprunté, dans des travaux comme ceux de Bertillon et Lacassagne, l'admirable classification des facteurs, des modificateurs qui affectent la population et la santé publique, et forment leurs divers milieux : physique, chimique, biologique, psychique, social (2). La révolution qui s'accomplit aujourd'hui dans la criminologie est marquée par l'abandon de l'étude abstraite du crime comme entité juridique, selon l'expression de Ferri, et par l'étude systématique de l'ensemble des conditions dans lesquelles le crime se produit. C'est là qu'apparaît la hiérarchie des sciences : sans parler du milieu extérieur dont Quetelet et Guerry ont déjà montré l'influence, la production du crime dépend des conditions physiques du criminel, de ses conditions psychologiques ou de la nature et de la formation de son caractère, de ses habitudes, de l'imitation, enfin

vantes, et concluant : « Ainsi se trouve réalisé le caractère du passage de chaque science à une science voisine... entre les mathématiques et les sciences relatives aux propriétés inorganiques des corps, entre ces sciences et celles qui ont pour objet des êtres organisés, entre ces dernières et l'étude des facultés humaines. Enfin, de cette étude à celle des langues, de la littérature et des arts libéraux, et de celles-ci aux sciences sociales la liaison n'est-elle pas également évidente ? »

(1) DE HUMBOLDT a bien marqué la distinction des sciences abstraites et concrètes (édit. belge, t. I<sup>er</sup>, p. 36 et suiv.), la division de la philosophie inorganique et de la philosophie organique (p. 281), la place des sciences sociales (p. 296); HOUZEAU, *Histoire du sol de l'Europe et Géographie physique de la Belgique*; E. RECLUS, *La Terre*.

(2) Voy. BERTILLON, son article *Mésologie* du dictionnaire de médecine de Dechambre; LACASSAGNE, *Traité d'hygiène*.

des réactions sociales complexes, économiques, morales, politiques, qu'il subit (1).

Le conflit des écoles est né de la part faite à chacun des principaux facteurs : l'école anthropologique n'a vu que le facteur biologique; la conception du type criminel et ses effroyables conséquences ont provoqué une réaction salutaire de la psychologie et de la sociologie. Le débat se résout sous nos yeux dans la constitution de la sociologie criminelle, où l'ordre de subordination fondamental des conditions biologiques, psychologiques et sociologiques du crime subsiste, mais où les conditions psychiques et sociales, par la complexité de leur action modificatrice, arrachent l'explication du crime à la fatalité de la constitution organique du criminel (2).

Passez à la sociologie économique en voie de constitution ; la théorie des richesses naturelles, qui n'est autre que celle du milieu économique, se consolide par la classification des sciences. Dans l'ensemble des recherches que je poursuis, je l'ai vue éclairer bien des aspects de la sociologie économique. Il est, par exemple, peu de questions se rattachant au travail qui ne réclament l'intervention de la physique, de la chimie, de la biologie, de la psychologie. Dans la question de la limitation des heures de travail, la théorie de la fatigue musculaire et nerveuse appartient à la chimie et à la biologie; les lois du sentiment de la fatigue et celles de l'attention volontaire appartiennent à la psychologie; l'ensemble des circonstances économiques, morales, juridiques, religieuses, qui affectent la durée du travail, appartient à la science sociale.

Dans l'œuvre de Malthus, la loi d'accroissement des subsistances est tout à fait empirique, la loi de la population a le caractère d'une véritable loi physique exprimant une tendance invariable dans tous les milieux et tous les temps; avec les progrès de la sociologie économique, cette tendance fléchit peu à peu sous le vaste faisceau d'influences modificatrices qu'exercent les conditions biologiques, psychologiques, sociales; celles-ci surtout variant elles-mêmes aux différentes époques et dans les différents milieux.

(1) FERRI, *Sociologie criminelle*; QUETELET, *Physique sociale*; GUERRY, Introduction à son *Atlas de statistique morale comparée de la France et de l'Angleterre*.

(2) Voir les procès-verbaux du Congrès d'anthropologie criminelle de Bruxelles. Biologie. Sociologie.

La loi empirique de l'accroissement des subsistances fait place à son tour aux lois complexes de la chimie agricole et de la physiologie végétale. Les découvertes de Liebig, comme les expériences de Gilbert et Lawes, retentissent dans l'économie politique; tous les progrès de la chimie affecteront les lois de l'équilibre de la population et des subsistances, si la science réussit à produire industriellement, ce qui n'est pas un vain rêve, l'albumine par synthèse totale. Ce principe de Malthus, qui renfermait, aux yeux de Mill, la loi la plus importante de la science économique, perdrait, je pense, tout son aspect redoutable, et l'économie politique elle-même subirait dans toutes ses parties des modifications profondes.

C'est ainsi que la classification des sciences est un guide sûr dans l'explication des phénomènes sociaux, en permettant à la fois de dérouler méthodiquement la chaîne de leurs antécédents et de marquer toujours l'ordre de subordination des influences qu'ils subissent.

III. La philosophie positive complète son œuvre explicative en considérant toujours, dans l'étude de la société, tous les aspects de son organisation et de son activité, économique, scientifique, esthétique, moral, juridique, politique, comme en corrélation les uns avec les autres et réagissant incessamment les uns sur les autres.

Je n'ai pas à examiner en ce moment si Auguste Comte a vraiment constitué la sociologie; cette question, qui passionna Littré contre Mill, est aujourd'hui mieux éclairée par les travaux et la critique de Spencer, Schæffle, Fouillée, De Greef (1); et Littré ne verrait plus, sans doute, dans l'œuvre de son maître qu'une admirable contribution à la sociologie. Mais ce qui est certain, c'est que depuis Auguste Comte la société est définitivement étudiée comme un phénomène naturel dans l'ensemble de ses conditions d'existence et de développement. Pour la science moderne, l'Humanité a cessé de réaliser dans l'histoire un plan divin et de dérouler dans le temps une formule philosophique. Sa marche progressive, soumise à des lois, est caractérisée simplement par la prédominance des attributs supérieurs de la nature humaine.

(1) LITTRÉ, *Auguste Comte et Stuart Mill*; H. SPENCER, *Introduction à la science morale et Principes de sociologie*, surtout volume II; ALBERT SCHÆFFLE, *Vie et Structure du corps social*; E. FOUILLÉE, *la Science sociale contemporaine*; G. DE GREEF, *Introduction à la sociologie*, surtout le t. I<sup>er</sup>.

Auguste Comte a généralisé les idées d'Adam Smith sur la division du travail en les appliquant à l'ensemble des opérations sociales matérielles ou spirituelles, et il a reconnu le caractère organique des sociétés dans la dépendance mutuelle des parties résultant de la division du travail et dans leur coopération commune à la vie collective. Spencer, après sa longue étude des analogies du corps social et de l'organisme individuel, ne trouva rien de plus pour résumer leurs ressemblances, et si Albert Schæffle a poussé plus loin l'analogie, ce qu'une critique superficielle lui a trop sévèrement reproché, car son œuvre n'en est pas altérée dans son essence, il conserva toujours la même donnée fondamentale que Comte (1). Or, c'est l'une des vues les plus profondes de celui-ci que tout phénomène social et toute classe de phénomènes sociaux doivent être étudiés dans leurs rapports de filiation avec ceux qui les précèdent et dans leur corrélation avec ceux qui les accompagnent : leur explication n'est complète qu'à ce prix.

Rapprochement intéressant pour l'histoire de l'esprit humain : il y avait vingt-deux ans déjà que Savigny, dans sa célèbre profession de foi, avait montré que le droit, devenu, grâce à lui, une catégorie historique, est en corrélation constante avec les autres aspects de la civilisation (2), quand Rossi, dans son cours de 1836-1837, soutenait encore que toutes les branches du savoir social sont théoriquement indépendantes les unes des autres. Rossi, cependant, versé dans la science économique, le droit civil et pénal, le droit public et le droit des gens, était mieux que personne préparé à la sociologie (3).

A peu près au même moment, en 1837-1838, dans son cours de philosophie positive, Comte condamnait sans merci cet isolement

(1) SCHÆFFLE a donné pour sous-titre à son œuvre : *Essai encyclopédique d'une physiologie et d'une psychologie réelle du corps social*. Dans l'Introduction, il expose les analogies de l'organisme individuel et de l'organisme social, mais il ne s'abandonne pas dans son œuvre à l'analogie. Il consacre le chapitre final de la Partie générale à développer cette pensée que la société humaine ne représente pas une simple continuation des phénomènes biologiques, mais répète la nature inorganique et organique en une organisation nouvelle plus élevée, plus spirituelle; SPENCER, *Sociologie*, t. II, p. 192 : le seul point commun que nous reconnaissons entre les deux genres d'organismes, c'est que les principes fondamentaux de l'organisation sont communs à l'un et l'autre.

(2) Voir A. RIVIER, *Introduction à l'étude du droit romain*.

(3) Rossi, *Cours de 1836-1837*, seconde leçon.

théorique de chacune des sciences sociales et n'admettait pas que l'analyse de l'un des aspects de la société pût être accomplie, abstraction faite de l'analyse des autres aspects. L'étude isolée de l'économie politique, comme l'entendait Rossi, était pour Comte le symptôme de son caractère métaphysique (1). A qui l'histoire des idées a-t-elle donné raison ? D'une manière éloquente, à Auguste Comte. A la vérité, sa pensée, bien que des critiques aussi éclairés que Schiattarella l'aient contesté contre Cairnes, était que la sociologie doit être fondée d'après une étude d'ensemble, comme science unique ; il n'admettait réellement de subdivision que pour l'avenir, dans la science sociale (2).

Comte, dans sa grande tentative pour constituer une sociologie, a été suivi par des penseurs de la puissance intellectuelle d'un Herbert Spencer et d'un Schæffle ; mais la science s'est engagée aussi dans une direction intermédiaire, qui satisfait à la fois au désir de spécialiser les recherches sociologiques et de leur conserver un caractère vraiment organique. On a admis que les diverses classes de phénomènes sociaux peuvent être des objets particuliers d'études, pourvu qu'elles fussent toujours considérées comme faisant partie d'un ensemble dont tous les éléments réagissent les uns sur les autres ; à côté des essais de sociologie générale, nous voyons se constituer aujourd'hui, par une transformation profonde et salutaire, des sociologies spéciales : la sociologie criminelle, la sociologie économique, la sociologie politique, la sociologie juridique (3).

(1) COMTE, *Philosophie positive*, 47<sup>e</sup> leçon, t. IV, p. 198-199 : « Cette irrationnelle séparation fournit un symptôme irrécusable de la nature essentiellement métaphysique des doctrines qui la prennent pour base. » P. 253 : « Sans doute, la science sociale pourra être un jour rationnellement subdivisée avec utilité, mais nous ne pouvons nullement savoir aujourd'hui en quoi consistera cette subdivision... la science ne saurait être fondée maintenant que d'après une étude d'ensemble. »

(2) CAIRNES, *Essays in political economy*, ch. VIII ; M. Comte and *political Economy*, p., 269 et suiv. ; SCHIATTARELLA, *la Filosofia positiva e gli ultimi economisti inglesi*, 1876. Voir p. 104, l'auteur condamne l'opinion de Cairnes d'une manière trop absolue.

(3) FERRI, *Sociologie criminelle*, introduction ; E. SCHEEL, dans le *Handbuch der politischen Oekonomie*, dirigée par SCHENBERG, appendice de son *Histoire de l'économie politique*, considère comme une direction féconde pour cette science d'être traitée comme une partie de la science sociale ; INGRAM, *The present position and prospects of political economy*, 1878, p. 42 et suiv. Voyez surtout son appréciation des *Principes d'économie politique*, de MILL.

L'unité se concilie avec la diversité dans ce grand mouvement de la pensée scientifique, et s'il est évident qu'il ne s'accomplit pas partout sous l'impulsion de la philosophie positive, il est vrai aussi que partout il concorde avec la direction générale que la philosophie positive a donnée à l'esprit humain. Knies, le plus profond représentant de la méthode historique en Allemagne, fait en 1883, dans la dernière édition de son *Economie politique au point de vue historique*, un parallèle remarquable entre ses tendances, sa méthode et celle de son précurseur Auguste Comte (1). Le savant Marshall, en Angleterre, reconnaît la profonde influence de ce philosophe, et pour lui comme pour Knies, comme pour Mill dans les derniers travaux de sa vie, les conceptions économiques sont désormais relatives à des états donnés de la civilisation; elles ont perdu leur caractère abstrait, absolu (2).

Ingram, le plus récent historien de la science économique, rend à Comte un hommage plus glorieux encore, en rattachant à son œuvre critique et organique toute l'évolution moderne de la

(1) KNIES, *Die politische Oekonomie vom geschichtlichen Standpunkte*, 1882, p. 515. « Lorsqu'en 1852, j'écrivis mes études sur l'économie politique, le *Cours de philosophie positive*, par Comte, paru de 1830 à 1842, m'était totalement inconnu, comme aussi probablement à tous mes confrères allemands. Je fus donc très surpris de trouver tant de rapprochements dans les théories de Comte sur la méthode de la sociologie... »

« ...Je dois reconnaître que longtemps avant moi, au point de vue de la vie et de la science, il a dépeint l'existence effective d'une évolution constante que j'ai constatée dans le domaine particulièrement traité par moi de l'économie politique. »

(2) Alfred MARSHALL, *Principles of economics*, 1890, livre I<sup>er</sup>, ch. V, p. 72 et suiv. Il reconnaît que Comte a rendu un grand service en insistant sur l'unité qui enveloppe les phénomènes sociaux, mais il n'a pas réussi à montrer qu'il n'est pas utile de faire une étude spéciale de certaines classes de ces phénomènes.

Comte's doctrine that all the aspects of social life are so closely connected that they ought to be studied together was one side of a great truth... Comte did good service therefore by insisting that the solidarity of social phenomena must render the work of exclusive specialist even more futile in social than in physical science. Cependant Marshall approuve la pensée de Mill : *On Comte*, p. 84. « Social phenomena acting and reacting on one another they cannot rightly be understood apart; but this by no means proves that the material and industrial phenomena of society are not themselves susceptible of useful generalisations, but only that these generalisations must incessantly be relative to a given form of civilisation... »



science (1). Il aura fallu près d'un siècle pour éliminer l'hypothèse provisoire d'un ordre abstrait et invariable des sociétés, admise par les pères de la science.

Cliffe Leslie développe, dans ses admirables études, cette idée que la structure économique de toute société est le résultat, non seulement des forces économiques spéciales, mais de toutes les forces sociales, intellectuelles, morales, politiques (2) : toute l'œuvre des socialistes de la chaire marque ce rapprochement de l'économie politique de l'ensemble des sciences sociales (3). Avec

(1) INGRAM, *History of political economy*, 1888. « From this state of oscillation which has given to our century its equivocal and transitional aspect the only possible issue was in the foundation of a scientific social doctrine which should supply a basis for the gradual convergence of opinion on human questions. The foundation of such a doctrine is the immortal service for which the world is indebted to Auguste Comte, p. 196. — Ingram expose avec profondeur les traits principaux de la sociologie; dans sa conclusion, il rappelle (p. 242) que l'économie politique doit être constamment regardée désormais comme formant un département d'une science, plus large : la sociologie.

(2) CLIFFE LESLIE, *Essays in political and moral philosophy*, 1879, ch. XXVI, *Political economy and sociology*. Il résume sa pensée en disant : Political economy is thus a department of the science society which selects a special class of social phenomena for special investigation, but for this purpose must investigate all the forces and laws by which they are governed, p. 404; M. Henri Saint-Marc, dans sa vaste étude sur l'enseignement de l'économie politique en Allemagne et en Autriche (1892), dit, en parlant de l'école française (p. 119) : « En économie politique, nous trouvons une école puissante, sectaire, orgueilleuse...; par le sarcasme, plus souvent encore par la conspiration du silence, elle a étouffé des hommes comme Dupont White et Cournot, et si le père de la science sociale, Auguste Comte, est connu dans sa propre patrie, c'est à quelques philosophes, surtout anglais, qu'il le doit, mais non aux économistes de son pays. Son crime est d'avoir écrit quelques passages dans le genre de celui-ci : « Toute étude isolée des divers éléments sociaux est par la nature de la science profondément irrationnelle et doit demeurer stérile à l'exemple de l'économie politique. » Cf. ESPINAS, *Histoire des doctrines économiques*, p. 315.

M. Saint-Marc, résumant les caractères de la nouvelle école allemande, lui assigne comme idée fondamentale que les phénomènes économiques sont soumis à des rapports nécessaires de séquence et de coexistence, non seulement entre eux, mais encore relativement aux autres phénomènes sociaux, les mœurs, le droit, la religion, la constitution politique, les relations internationales (p. 10 et suiv.). Voir aussi CUSUMANO, *le Scuole germaniche*, 1875, surtout ce qu'il dit des socialistes de la chaire.

(3) Le caractère organique de la science économique allemande se révèle nettement dans les travaux d'ensemble, comme le *Handbuch der politischen Oekonomie*, de SCHENBERG, 1<sup>re</sup> partie, *l'Economie sociale*;

eux et avec les écoles scientifiques du socialisme, l'interprétation des phénomènes sociaux réalise encore un progrès décisif ; bien que les phénomènes de la vie matérielle ou économique soient directement influencés par tous les autres modes d'activité des sociétés, ils apparaissent néanmoins comme les plus essentiels, tenant en leur dépendance l'expansion de toutes les formes plus élevées de la vie sociale, intellectuelle, morale, esthétique, reproduisant dans la vie collective la subordination de la vie de relation à la vie organique.

La loi générale de corrélation de tous les aspects de la société se complice d'une loi de subordination, d'une véritable hiérarchie fondamentale des phénomènes sociaux, qui prolonge la classification générale des phénomènes observables jusqu'au cœur de l'être collectif même (1). C'est ainsi que nous verrons de Laveleye, malgré son inexplicable éloignement pour toute assimila-

Schönberg montre son unité organique en disant que toutes les économies privées se développant dans une histoire commune gouvernées par le même droit, soumises aux influences de la même morale et des mêmes coutumes, des mêmes aspirations et des mêmes objectifs moraux et idéaux du peuple, concourent unitairement à une action collective pour réaliser dans l'intérêt de l'individu et de la communauté les fins économiques et civiles de l'Etat et de la société ; les chapitres sur les phases économiques de l'histoire de l'économie sociale, sur l'éthique et la science sociale, sur les fonctions de l'Etat, ne sont que le développement de cette conception ; Adolphe WAGNER, *Allgemeine oder theoretische Volkswirtschaftslehre*, t. 1<sup>er</sup>, ch. III, *Organisation de l'économie sociale. Ses principes d'organisation*, au nombre de trois : principes de l'économie privée, charitable, commune, forment le véritable fondement psychologique de l'économie sociale, par opposition à l'individualisme absolu de l'école classique. Tout le reste du premier volume de Wagner, qui comprend plus de huit cents pages, est consacré au droit économique mis en rapport avec les principes organisateurs de la société. Voir DE LAVELEYE, *le Socialisme contemporain*, une étude spéciale sur les rapports de l'économie politique avec la morale, le droit, la politique et l'histoire. Conf. INGRAM, *loc. cit.* Voir encore Albert SCHÆFFLE, *Vie et structure du corps social*, partie III, surtout ch. VI.

(1) Cette loi de subordination, inséparable de la loi des corrélations des divers aspects de la vie sociale, est, j'ose le dire, aujourd'hui incorporée à la science. J'ai montré comment elles se dégagent l'une et l'autre de toute l'évolution des écoles modernes, dans *l'Economie politique et la Constitution progressive de la sociologie au XIX<sup>e</sup> siècle* ; *Introduction à l'histoire des systèmes sociaux*, 1889 et 1890. Le moment éthique de la science est donné par la réaction décisive de la morale et d'un droit supérieur sur les phénomènes économiques, à mesure que l'on dégage plus nettement la loi suivant laquelle la participation des membres de la société aux bienfaits de la civilisation est subordonnée

tion de la société à un organisme, consacrer une partie de sa grande œuvre sur la *Démocratie* à la recherche des causes économiques de la chute des républiques anciennes, de même qu'Achille Loria, inspiré, lui, de la philosophie positive, scrutera les fondements économiques des institutions politiques. Ferri, dans l'ensemble de ses travaux de sociologie pénale, interrogera, armé de la statistique, toutes les causes économiques et sociales du crime, et nous verrons un congrès d'anthropologie criminelle réclamer des investigations sur les crises économiques et leur part d'influence dans les progrès de la criminalité.

Interprète de la pensée scientifique moderne, la philosophie positive, par sa conception organique du savoir humain et par sa conception organique de la société, tend donc à rendre de plus en plus relative la connaissance des différentes classes de phénomènes sociaux. Or, c'est là précisément que surgissent pour nous les promesses d'avenir.

L'esprit humain rattache d'abord chacune de ces classes de faits à un petit nombre de données abstraites, à des causes simples opérant uniformément à toutes les époques et dans tous les milieux; l'ordre qui en résulte apparaît comme immuable; mais à mesure que la science abaisse les barrières qui séparent les diverses classes de faits sociaux et qu'elle remonte plus avant dans leur genèse historique, les causes apparaissent plus complexes, empruntées aux diverses manifestations de l'homme social et variant aux différentes époques. Les lois de ces phénomènes sociaux n'exprimeront plus désormais les tendances de causes simples, mais la résultante du concours d'antécédents complexes soumis à des variations historiques; l'ordre social

aux conditions économiques et surtout à la répartition des richesses et du loisir.

Schönberg, dans le *Handbuch*, t. I<sup>er</sup>, *die Volkswirtschaft*, montre que l'économie sociale n'a pas seulement un caractère matériel, mais détermine les conditions de la vie morale et de la culture, de la civilisation proprement dite. Dans son livre sur *la Paix et la Guerre*, t. I<sup>er</sup>, liv. II, et t. II, liv. IV, Proudhon subordonne aux conditions de l'équilibre économique toute l'évolution du droit privé et public. C'est la pensée dominante de Marx que toutes les manifestations supérieures de l'activité sociale sont subordonnées aux formes de la production. *Zur Kritik der politischen Oekonomie*, 1859. *Le Capital*, de Marx, est une illustration de cette loi. Sur la subordination de la *politique* aux conditions économiques et financières, voir DE LAVELEYE, *le Gouvernement dans la démocratie*, t. II; la *Propriété et ses Formes primitives*, 2<sup>e</sup> édit.; Achille LORIA, *les Bases économiques de la constitution sociale*. Conf. H. D., *l'Impôt*; 1889.

qu'ils réaliseront spontanément ne pourra plus apparaître comme immuable et parfait, mais, au contraire, il apparaîtra à chaque époque comme essentiellement modifiable et perfectible. Dès lors, l'intervention sociale pour améliorer cet ordre sera d'autant moins arbitraire et plus efficace que la multiplicité des influences qu'il subit sera mieux connue.

La science, en traçant ainsi la sphère de l'intervention humaine, est comme l'organisme intellectuel d'une liberté relative vraiment organique elle-même, exprimant la puissance de concevoir et de réaliser effectivement un idéal supérieur, en se fondant sur les lois des phénomènes (1).

On peut entrevoir ici le rôle considérable que remplira une école des sciences sociales comme la nôtre, quand on aura réussi à assurer une véritable continuité dans ses travaux et une convergence réelle des efforts isolés de ses professeurs.

IV. A cette conception sociologique correspond une direction féconde dans la morale sociale; l'expansion de l'un des sentiments immanents à la nature humaine nous fournit la puissance

(1) Dans la classification des sciences de Comte, plus les phénomènes se compliquent, et plus ils sont modifiables : l'ordre qui s'y réalise spontanément d'après leurs lois naturelles est d'autant plus imparfait qu'ils s'élèvent en complexité. Les phénomènes sociaux sont les plus complexes, les plus désordonnés de tous, et, partant, les plus modifiables. COMTE, *Philosophie positive*, t. IV, p. 247 et suiv. : « Bien loin donc de repousser l'intervention humaine, une telle philosophie en provoque, au contraire, éminemment la sage et active application, à un plus haut degré que pour tous les autres phénomènes possibles. » *Ibid.*, p. 249 : « Tel est le fondement scientifique des espérances rationnelles d'une réformation systématique de l'Humanité. » *Ibid.*, p. 283. On voit combien la philosophie positive s'éloigne du fatalisme. La critique du *laisser-faire* en économie politique se base sur le même principe : « Pour avoir plus ou moins imparfaitement constaté la tendance naturelle des sociétés humaines à un certain ordre nécessaire, cette prétendue science en a très vicieusement conclu l'inutilité fondamentale de toute institution spéciale directement destinée à régulariser cette coordination spontanée, au lieu d'y voir seulement la source première de la possibilité d'une telle organisation. » *Ibid.*, p. 200. SCHIATTARELLA, *la Filosofia positiva e gli ultimi economisti inglesi* : « Le mouvement actuel des études économiques en Allemagne a certainement son précurseur dans A. Comte. Les trois erreurs capitales, qui sont combattues dans ces dernières années dans les doctrines économiques de l'école anglaise, le procédé abstrait dans la recherche, l'absolutisme de la théorie du *laisser-faire*, la doctrine mécanique et négative de l'Etat furent combattues il y a cinquante ans par Comte, et avec des raisons auxquelles rien de meilleur n'a été ajouté par les économistes allemands et italiens. »

qui fera concourir tout le savoir accumulé au progrès de la société.

La solidarité est, sous l'aspect moral, le lien qui unit l'individu à la société, les parties de l'organisme collectif à l'ensemble, qui les livre à des réactions réciproques incessantes, qui leur communique les mêmes ébranlements, les rendant inséparables, dans le bien et le mal.

Elle a pris des aspects grandioses et terribles dans la crise économique et sociale moderne, qui nous a fourni la saisissante démonstration de la constitution rapide de l'unité de la société humaine, de l'Humanité. Une même baisse graduelle des prix s'est étendue sur le marché du monde, témoignant qu'il est soumis à l'influence de mêmes causes générales; les mêmes réactions sur les différentes branches du revenu : profits, salaires, intérêts, rente, et sur les classes sociales correspondantes, ont été observées chez les nations industrielles; les conflits répétés et violents du capital et du travail ont répondu partout, avec une sinistre uniformité, aux perturbations des prix; le même entraînement protectionniste, à des degrés divers, a sollicité les nations industrielles; le mouvement de la population et des mariages a reflété les fluctuations de l'ordre économique, et l'accroissement du crime, du suicide, de la folie en a été la projection redoutable. Jamais on n'a pu observer plus directement la solidarité qui lie l'individu à la société et la pression que les causes générales inhérentes à l'état social exercent sur les actes volontaires de l'homme.

Cette solidarité acquiert un caractère organique et rigoureux dans la sociologie moderne. La philosophie positive marque le moment où la coopération de tous à la vie de la société et la solidarité organique qui en dérive deviennent nettement conscientes pour les individus et le corps social. Adam Smith avait très bien vu, au moins dans la vie économique des sociétés, la coopération et la solidarité de toutes les parties; seulement, dans sa doctrine qui a prolongé jusqu'à nous son influence, les individus n'avaient pas conscience de leur œuvre collective; ils ne se préoccupaient d'aucun but social à atteindre, ils n'obéissaient qu'à leur intérêt personnel, à leur égoïsme; le but social n'était conscient que dans la pensée du créateur, dont les individus faisaient, sans le vouloir ni le savoir, rayonner la pensée dirigeante. Supposez maintenant que l'hypothèse optimiste de la théologie naturelle soit écartée, que la coopération et la solidarité deviennent conscientes; l'intérêt personnel ne pourra plus désor-

mais être le mobile exclusif de l'individu. « Ce qui fait la valeur morale de la division du travail », dit Durkheim, dans le bel ouvrage qu'il vient de consacrer à la division du travail social, « c'est que par elle l'individu reprend conscience de son état de dépendance vis-à-vis de la société; c'est d'elle que viennent les forces qui le retiennent et le contiennent; en un mot, puisque la division du travail devient la source imminente de la solidarité sociale, elle devient du même coup la base de l'ordre moral (1). »

J'admire profondément Auguste Comte, je l'avoue, pour avoir, non pas résolu définitivement les problèmes de morale sociale, mais solidement rattaché à la sociologie positive la direction morale la plus féconde, la forme la plus élevée de l'altruisme. La conception organique de la société pénétrant dans la conscience individuelle, l'individu adapte sa conduite aux conditions de la conservation normale et du progrès continu de la société; il sort de l'isolement pour former des associations fonctionnelles dans lesquelles toute activité, selon l'expression de Laffitte, est ramenée à l'ensemble (2) : *son intérêt fléchit devant sa fonction sociale*, il y a limitation nécessaire de l'égoïsme, expansion des-

(1) E. DURKHEIM, de la *Division du travail social*, p. 450. L'impératif catégorique de la conscience morale est en train de prendre la forme suivante : mets-toi en état de remplir utilement une fonction déterminée, p. 40. — L'individu s'habitue à ne se regarder que comme la partie d'un tout. — La société apprend à regarder ses membres comme des coopérateurs vis-à-vis desquels elle a des devoirs, p. 250.

COMTE, *Discours sur l'esprit positif*, p. 74. « L'ensemble de la nouvelle philosophie fait ressortir la liaison de chacun à tous sous une foule d'aspects divers, de manière à rendre involontairement familier le sentiment intime de la solidarité sociale étendue à tous les temps, à tous les lieux.

(2) Pierre LAFFITTE, *la morale positive*, p. 116 et suiv., 1881. Toute activité étant ramenée à l'ensemble, chacun de ces éléments doit se considérer comme associé à une œuvre commune à laquelle il coopère par une fonction distincte, dans la mesure de ses forces morales, physiques et matérielles, p. 116. — Le sacrifice ne suffit pas pour faire un devoir, il faut que l'altruisme s'élève et tienne compte de la connaissance positive des conditions qui rendent le dévouement socialement efficace. Il n'y a pas de devoir sans le sentiment de l'harmonie à laquelle sa propre fonction concourt dans l'espace et dans le temps, p. 121.

A. SCHAEFFLE, *le Collectivisme (Revue sociale et politique)*; 1893. « L'individu est et devient toujours davantage une molécule sociale, mais il n'y arrive qu'en devenant avec une liberté toujours plus grande un membre bien particulier de la communauté. L'individualisme, d'une part, et l'absorption sociale de l'individu, d'autre part, sont les deux pôles également essentiels sous l'influence alternative

sentiments altruistes, c'est la véritable expansion de la vie, dont parle Guyau (1).

Cette tendance s'affermir et s'épure encore quand il saisit le lien de la solidarité, non seulement dans l'espace, mais dans la suite des siècles. Nul n'a trouvé d'accents plus sublimes que Comte pour peindre l'influence constante du passé sur le présent et montrer cette dette accumulée des vivants qui doivent aux morts tout ce qu'ils sont et ne peuvent s'acquitter qu'à force de servir l'Humanité. En pénétrant dans la conscience sociale, cette conception organique détermine la genèse d'un droit supérieur, rayonnement de la solidarité, base d'une liberté positive pour tous; la notion de l'Etat s'élargit, devient organique à son tour; il se confond peu à peu avec la société, pleinement consciente de ses lois; il ne se borne plus à assurer la libre coexistence et à fixer les conditions de lutte d'unités humaines mues par leurs intérêts, il régularise encore dans le mouvement de l'histoire la coordination spontanée et imparfaite qui s'opère entre les fonctions et les organes de l'être collectif, de manière à assurer la participation la plus complète de tous à la vie toujours plus harmonieusement épanouie de l'Humanité.

Les travaux des plus nobles penseurs du siècle ont préparé la conception morale de l'Humanité, mais le plus souvent en l'unissant à des formes théologiques nouvelles. Que ne puis-je ici me détacher assez des passions d'écoles pour être un moment l'organe de la justice de l'histoire! Ainsi, les saint-simoniens tendaient à la constitution d'une association universelle, substituant à l'exploitation de l'homme par l'homme l'action harmonique des hommes sur la nature (2); Fourier, visionnaire de génie, avait trouvé dans la série la loi de distribution des groupes formés par les attractions dominantes et le secret de la constitution finale

desquels la vie humaine et le développement de l'Humanité se poursuivent. Cette troisième conception peut s'appeler celle de la *solidarité sociale*.

(1) Selon lui, la vie individuelle, au lieu de n'être sociale et sociable que par accident, comme dans l'utilitarisme, est sociable par essence. Ce qui résulte des tendances normales de la vie, de son intensité naturellement débordante, c'est l'altruisme. FOUILLÉE, *la Morale, l'Art, la Religion d'après M. Guyau*, p. 96 et suiv.; GUYAU, *Esquisse d'une morale*, t. I<sup>er</sup>, chap. I<sup>er</sup> et suiv.

(2) Voir les *Œuvres choisies de SAINT-SIMON*, surtout t. II, p. 370 et suiv., et t. III, p. 144 et 192, et l'*Exposé de la doctrine saint-simonienne* de BAZARD, surtout 2<sup>e</sup> et 4<sup>e</sup> séances.

de l'Humanité (1); Krause se proposait la réalisation d'une Humanité idéale par un vaste système d'associations coordonnées et concourant au développement intégral des facultés de l'individu et à la perfection de l'ensemble (2); P. Leroux, qui ne réussit jamais à voir dans la société un organisme, conçu cependant la vie comme un échange incessant entre l'individu et ses semblables, entraînant une solidarité indéfectible; Feuerbach et Proudhon (3), plus audacieux, écartaient l'intermédiaire divin entre l'homme et l'homme pour mieux assurer la communion de l'humanité (4).

Auguste Comte, entraîné par le sentiment d'une solidarité universelle, n'a conçu d'autre être réel que l'Humanité, l'individu n'étant rien que par elle (5). Cette solidarité organique, il l'a finalement transportée, lui aussi, de la philosophie scientifique dans la religion. La religion de l'Humanité, c'est la réalisation idéale, projetée devant nous, d'une harmonie morale définitive et parfaite, dans laquelle l'individu, sacrifiant toute fin égoïste, est tout entier confondu dans sa fonction sociale : c'est le triomphe de l'altruisme. Il fixe ainsi un type moral absolu de l'Humanité, c'est-à-dire qu'il contracte dans un symbole toute l'évolution future du genre humain et l'objective comme une réalité suprême proposée à son nouveau culte.

Cet entraînement de Comte vers l'absolu ne renferme point la condamnation de la philosophie positive, elle l'oblige simplement à revenir avec modestie au principe de relativité sur lequel Comte lui-même l'a fondée, et à se donner pour mission de dérouler ce glorieux symbole dans le temps. Elle reste en possession d'une donnée décisive de la morale sociale; le sentiment d'une solidarité indestructible de tous les éléments du corps social, d'un concours incessant de toutes les générations, sentiment qui prendra peu à peu une telle netteté dans toutes les consciences,

(1) *Nouveau Monde industriel* de Ch. FOURIER, et la *Doctrin sociale* de V. CONSIDÉRANT. t. II, chap. VI et la belle étude de H. RENAUD, *la Solidarité*.

(2) *Exposé de la doctrine sociale de Krause*, par DARIMON, 1848.

(3) *De l'Humanité*, par P. LEROUX, liv. I<sup>er</sup>, surtout chap. VIII sur la conception non organique de l'Humanité. Liv. IV, sur la solidarité comme synthèse de l'égoïsme et de la charité.

(4) FEUERBACH, *Essence de la foi* et *Essence du christianisme*, traduction EWERBECK et J. RÖY; PROUDHON, *de la Justice*, 1<sup>re</sup> étude, chap. IV.

(5) Voir son *Discours sur l'esprit positif*. « Pour l'esprit positif, l'homme proprement dit n'existe pas, il ne peut exister que l'Humanité, puisque tout notre développement est dû à la société. » P. 74.



que l'Humanité entière sera présente, dans sa réalité et son idéalité, à tout acte de la vie sociale, à tout événement de son histoire.

Ce but social sans cesse poursuivi n'exclut pas la légitimité des fins individuelles à poursuivre. A l'inverse de Comte, Spencer n'a vu dans l'Humanité qu'un être virtuel, il n'a vu de réalité que dans les individus, éléments conscients irréductibles (1); mais sa morale sociale manque de cette pénétration de la solidarité, qui est, cependant, la déduction naturelle de la conception organique des sociétés. La philosophie positive verra une double réalité dans l'être humanitaire et dans l'individu; mais elle montrera que le développement le plus élevé de l'individu, que sa véritable liberté organique et positive est le fruit même d'une solidarité toujours plus étroite.

La justice exprimera le rapport de la fonction sociale et du droit de l'individu, justice progressive, car la préoccupation du but commun dépassera peu à peu dans les consciences la préoccupation des buts personnels.

La philosophie positive n'empruntera ainsi les éléments d'une morale sociale indéfiniment perfectible qu'à la nature sentimentale et intellectuelle de l'homme et aux conditions d'existence et de progrès de la société.

L'organisme moral, dégagé comme l'organisme scientifique de toute théologie et de toute métaphysique, sera humain, rien qu'humain. Par là, la morale sociale, placée au-dessus des divergences irréductibles des doctrines, acquerra, dans la paix définitive des esprits, une universalité qui échappe de plus en plus à toute doctrine enchaînée à l'absolu, une efficacité qui ne peut être obtenue qu'en puisant directement aux sources du sentiment humain. Sans doute, la philosophie positive ne proposera à l'homme qu'un but terrestre à atteindre, laissant à la liberté de l'esprit les spéculations sur l'inconnu; mais ce but est le plus élevé qui soit concevable; dans cette préoccupation incessante

(1) A. SPENCER (*Sociologie*, t. II, p. 20), signale comme différence cardinale entre l'organisme individuel et l'organisme social que chez l'un la conscience se concentre dans une petite partie de l'agrégat et que chez l'autre elle est répandue dans tout l'agrégat: dès lors, qu'il n'y a pas de *sensorium* social, il s'ensuit que le bien-être de l'agrégat, considéré à part de celui des unités, n'est pas une fin qu'il faille chercher. La société existe pour le profit de ses membres, les membres n'existent pas pour le profit de la société (*Ibid.*, p. 423). Voir *Justice*, par H. SPENCER, 1893. Cf. l'aspect positif de sa notion de la justice avec la notion du devoir. Chez COMTE et LAFFITTE, *Morale positive*, chap. V, ou même PROUDHON, *Justice*, 1<sup>re</sup> étude; RENOUVIER, *Science morale*, chap. XIV et suiv.

qui enveloppe le passé, le présent et l'avenir, elle disciplinera sans cesse les égoïsmes, marquant leurs limites dans le temps et l'espace, préparant les uns à subir des transformations nécessaires, les autres à subir des transitions nécessaires.

V. La solution de la crise morale et sociale est dans l'affirmation de la solidarité humaine guidée par la science humaine. Ainsi se dégageront des arrangements sociaux, des formes organiques supérieures reliées par un Droit plus pur, nous rapprochant davantage du type pacifique et industriel des sociétés.

C'est sous l'action de l'idéal que s'opèrent ces transformations, et la société s'y élève en réagissant contre l'imperfection de son organisation présente; l'Humanité est bien, comme l'a dit un profond penseur, un organisme qui se réalise progressivement en se convenant, en s'idéalisant, en se voulant lui-même (1). Le problème est de donner toujours à l'idéal social à la fois le fondement le plus solide, la discipline la plus sévère et l'efficacité la plus grande. C'est ce problème que la philosophie positive s'attache à résoudre.

La sociologie dégage de mieux en mieux les tendances fondamentales de la société; par là même, elle trace la direction que doit prendre toute intervention régulatrice dans le développement social et les limites inflexibles qu'elle ne peut franchir. Toute conception de l'idéal qui méconnaîtra ces lois sera frappée de stérilité.

En même temps, comme je l'ai montré, par son incomparable labeur, elle met en lumière l'extrême complexité des phénomènes sociaux, les circonstances qui troublent, paralysent les tendances progressives de la société ou en retardent les manifestations: par là aussi, elle marque l'étendue que peut avoir à chaque moment l'action réfléchie de la société pour régler son évolution et les lois selon lesquelles elle doit s'accomplir.

La science réunit ainsi, à chaque moment, les matériaux d'un idéal qui, sorti de la réalité, pourra revenir aussi à la réalité, et qui, pour ne plus se dresser jusqu'aux cieux, dépassera finalement nos aspirations les plus audacieuses et conjurera les retours du pessimisme et de la désespérance. La sociologie criminelle n'ose-t-elle pas tenter d'éliminer graduellement le crime de la société? Dans la réaction actuelle qui nous reporte, à notre honte, vers le type militaire et le particularisme économique, au milieu de nos déchirements sociaux, quelles formes multiples et fécondes d'un droit supérieur ne pourrait-on déjà faire jaillir de la solidarité!

(1) FOUILLEE, *la Science sociale contemporaine*, p. 115.

Que ne faudrait-il pas attendre, par exemple, d'un effort pour ressaisir le lien moral du monde, dans l'ordre des phénomènes économiques les plus essentiels à la vie collective! Une convention monétaire internationale, une entente des gouvernements pour rechercher et fixer les bases d'une législation protectrice du travail ne seraient-elles pas aujourd'hui les plus urgentes, ses plus précieuses affirmations de la solidarité internationale? La première, en rendant plus de stabilité aux prix et en assurant une meilleure distribution de l'instrument monétaire, ferait reculer le protectionnisme, rouvrirait les voies à la constitution de l'unité économique du monde; la seconde, fixant les limites de la concurrence internationale dans un système de garanties du travail, propagerait comme une onde bienfaisante la pacification des classes dans l'intérieur de chaque Etat, préparerait des formes supérieures d'organisation industrielle et refoulerait la cause la plus redoutable des guerres internationales que renferment dans leur sein les nations industrielles.

Pour s'accomplir par degrés, avec une méthode rigoureuse, l'œuvre de la solidarité n'en sera que plus sûre et plus puissante. Fouillée, séduit par la grandeur de la conception religieuse de Comte, admet que l'idéal suprême soit tracé pour qu'on en déduise ensuite les conditions d'existence et les moyens de réalisation (1). Mais ces conditions et ces moyens sont toujours relatifs à l'état présent de la société et lui doivent être empruntés. Si les perspectives d'un progrès indéfini de l'altruisme humanitaire se déroulent devant nous, il n'y a cependant d'idéal fécond que celui dont la réalisation est déjà contenue en puissance dans les énergies mentales et morales qui les conçoivent: c'est la seule interprétation que je donne ici à l'ingénieuse théorie des idées-forces. Or, cet idéal réalisable est relatif, non absolu; il se meut sur la ligne du temps, chacune de ses formes préparant toujours, par sa réalisation même, une forme plus élevée.

Il faut redouter que l'esprit confondu dans la contemplation d'un idéal suprême ne lui assigne une efficacité morale absolue, même dans un état très imparfait d'organisation sociale, et que,

(1) FOUILLÉE, *Science sociale contemporaine*. « Si l'idée du grand être social est la plus haute de toutes et exprime l'idéal même de la pensée, il en résulte qu'elle est vraiment l'idée directrice et aussi l'idée efficace par excellence. Comment alors la partie la plus importante de la méthode ne serait-elle pas celle qui détermine l'idéal suprême pour en déduire ensuite les conditions d'existence et ses moyens de réalisation? » P. 389.

perdant sa capacité pour l'action, il n'en vienne à considérer l'organisation sociale existante comme définitive et invariable.

C'est ainsi qu'Auguste Comte a associé la religion de l'Humanité à l'état social actuel, avec toutes ses inégalités et sa distinction des classes. Ses disciples rigides, parmi lesquels des penseurs de la plus grande puissance, comme Laffitte et Harrison, sont rebelles, hésitants et incrédules devant des transformations organiques profondes de la société moderne, telle que la transformation organique du salariat (1); seulement s'ils maintiennent les éléments de la hiérarchie des classes, ils s'efforcent de la pénétrer d'une morale sublime et de l'assujettir à une destination sociale.

La philosophie positive, dans son véritable esprit, auquel il faut revenir et rester fidèle, ne suspend à aucun moment la suite des transformations organiques des sociétés humaines. Il n'est pas de doctrine qui soit plus réfractaire à la pensée d'immobiliser un type d'organisation sociale, de le placer en dehors du temps et de l'espace; mais si elle n'assigne aucune limite à la perfectibilité de la société humaine, elle impose des méthodes inflexibles à tout effort pour régulariser le cours de l'histoire, conciliant ainsi sans cesse l'ordre et le progrès.

Je m'arrête ici. Littre, mon maître profond et modeste, m'a plusieurs fois rappelé, dans les derniers temps de sa vie, quelle faible contribution il avait pu apporter à la philosophie positive; il rapprochait tristement le peu de jours qui lui restaient de la grandeur de l'œuvre philosophique qui eût pu remplir sa vie. Que pourrais-je dire, moi qui ne suis que son disciple obscur, si ce n'est qu'il suffit à chacun de servir l'Humanité dans la mesure de ses forces; c'est ce que je crois avoir fait en vous montrant dans ses grandes lignes la mission sociale de la philosophie positive.

---

(1) LAFFITTE, *Morale positive*. Les fonctions temporelles comportent une division entre les directeurs et les agents directs des opérations matérielles... Les prolétaires constituent le corps social d'où surgissent les inégalités de forces et de lumières qui constituent essentiellement les deux pouvoirs généraux de toute société, p. 116; Frédéric HARRISON, *Remedies for social distress* dans *Industriel remuneratur conference*. Sa conclusion exprime toute sa pensée en résumant sa critique : « Industry must be moralised, infused with a spirit of social duty from top to bottom from peer to peasant, from millionaire to pauper. But to moralise society is the business of moralists preachers, social teachers, the economist has but little to add and his field is not here. » P. 462.

# VARIÉTÉS

---

## I. — RÉCENTES IMPRESSIONS DE FRANCE

(Traduit de l'anglais par A. Richer.)

Un récent voyage en France n'a fait qu'implanter davantage dans mon esprit l'impression du grand changement qui s'est produit chez cette nation, en une génération. Traversant ce pays dans toute sa longueur, de la Manche à la frontière espagnole, j'ai été voir des contrées et des amis dont j'avais fait la connaissance il y a une vingtaine d'années. J'ai vu la France pour la première fois aux jours de Louis-Philippe; j'y séjournai alors à peu près six semaines en trois occasions différentes et, depuis son règne, je n'ai guère passé d'année sans visiter la capitale ou quelque province. Comme j'ai des amis français que je connais depuis au moins trente ans et des correspondants dans plusieurs départements, mes impressions ne sont pas celles d'un simple touriste; je les donne pour ce qu'elles valent.

La France a enfin retrouvé son élan, sa fierté, la conscience de sa force. Pour les Anglais, c'est une chose très difficile que de pouvoir pleinement saisir le sentiment d'humiliation — presque de désespoir — qui a envahi les Français patriotes et penseurs après la grande guerre de 1870 et toutes ses conséquences. L'idée commune chez nous est simplement celle-ci : la France a fait une impétueuse attaque, elle a été entièrement battue et a dû payer une énorme indemnité. Les Anglais, heureusement, ne savent pas ce qu'est la guerre et ne l'ont pas su même aux jours de Napoléon. Pour la France, cela s'est traduit par une longue agonie d'humiliation nationale, un tribut de guerre sans exemple, un dur service militaire devenu obligatoire dans chaque foyer, et une possibilité de ruine et

d'écroulement de la nation comme grande puissance. Pendant vingt-cinq ans, la France a supporté la douleur et le fardeau du moment. A présent, elle a recouvré sa force et le respect d'elle-même. Une nouvelle génération a grandi et cette transformation est, pour elle, un fait accompli ; pour elle aussi, les humiliations et sacrifices de ses pères ne sont plus qu'une question d'histoire.

On ne pouvait être en France, pendant les préparatifs pour accueillir le Tsar, sans reconnaître dans l'excitation du moment comme une expansion de la nation elle-même, et d'une réelle importance. Mes amis français admettaient volontiers que l'enthousiasme populaire présentait un aspect extravagant et même risible. « Mais, disaient-ils, cela est le symptôme du passage de la France d'un état de péril constant et d'isolement complet à un état de sécurité intérieure et au rang prépondérant dans la politique de l'Europe. Il y a vingt ans, son existence même, en tant que grande puissance, était considérée comme douteuse. Il y a dix ans, elle n'avait aucun allié, ni même l'espoir d'en trouver jamais. Aujourd'hui, l'alliance des deux plus grandes armées du monde et des seconde et troisième marines du monde constitue une puissance pratiquement invincible qui aura toujours une influence décisive en Europe. La visite officielle du Tsar et l'échange de manifestations étudiées rend cette alliance permanente, impose des conditions aux deux parties, et la fait connaître à tous. Il peut y avoir de l'extravagance dans les manifestations officielles et populaires, mais la ratification d'un aussi considérable triomphe pour la politique française explique tout emballement, et la valeur de l'alliance elle-même dépend beaucoup de ce qu'elle est apportée chez nous et manifestée à l'esprit de tout Français et dans tout foyer de l'Europe! »

On ne peut que reconnaître l'exactitude de cette prévision. Ce résultat est arrivé : l'Allemagne, l'Autriche et l'Italie l'ont tout à fait compris et reconnu. Si les Anglais croient encore que la France est en 1896 ce qu'elle était en 1871-75, ils seront bientôt brusquement déçus. Tout porte à montrer que l'alliance de la France et de la Russie est défensive, non agressive. Mais, quoiqu'elle ne fasse pressentir aucune atteinte à la

paix, elle est clairement considérée par les deux parties comme une affirmation de leur force et de leur prestige. On doit reconnaître que la France et la Russie, ainsi engagées dans une mutuelle coopération, n'ont à s'incliner devant aucune assemblée européenne. Il y a vingt ans, les deux nations, indifférentes l'une à l'autre, étaient bien loin d'occuper la première place dans l'estime générale. Après avoir retrouvé chacune toute leur force et leur prestige, il est inévitable que, parlant avec une intensité double, elles le fassent sur des tons très-différents de ceux d'il y a une génération.

Ce n'est pas seulement la France qui a gagné en force, dans une grande mesure, pendant une génération : c'est aussi la république. Celle-ci est à présent à sa seconde génération et certainement plus forte que jamais. Il n'y a dans la France d'aujourd'hui aucun signe visible d'un rival. En France, les masses semblent prendre la République pour une institution naturelle et indiscutable de même que nous autres considérons la Constitution britannique comme inaltérable. La visite du Tsar et ses courtoisies personnelles à l'égard de toutes les autorités et institutions républicaines doivent inévitablement fortifier la confiance en la République. Il a prouvé qu'une république démocratique n'est pas du tout incompatible, comme alliée, avec une monarchie autocratique. On avait l'habitude de dire qu'une république était exclue de toute alliance en Europe. Cela est évidemment chimérique. En France, aujourd'hui, rien autre chose qu'une république n'est visible ou concevable. Cela ne veut pas dire que la révolution, voire même la guerre civile, soient impossibles; encore moins cela exclut-il une dictature, ou un régime militaire. Mais cela rend impossible l'établissement de n'importe quelle sorte de monarchie par famille, de tout droit héréditaire à gouverner, comme celui que possèdent les Hohenzollerns, les Romanoffs, les Hapsburgs. Il n'y a et ne peut y avoir en France d'autre titre pour gouverner que celui de la capacité personnelle reconnue : pas un Français sur mille qui ne songe à autre chose qu'à cela, ce qui n'empêche pas, bien entendu, de différer d'opinion sur la personnalité en question ou sur la capacité de tel ou tel homme.

C'est là le besoin urgent de la France — et celui de quelques autres pays — : un homme. Ce qu'il y a de plus déplorable dans la vie française d'aujourd'hui, c'est l'habitude universelle de critiquer toute espèce de capacité. Qu'un homme montre seulement quelque supériorité réelle ou capacité à mener ses concitoyens, il est aussitôt le point de mire de l'insulte, de la diffamation et de l'intrigue. Mais la tendance générale des masses, à coup sûr des masses rurales (à présent, comme toujours, le dernier appel en France), est vers un gouvernement personnel et non parlementaire. La visite du Tsar a inévitablement, insensiblement, mais vigoureusement stimulé cette tendance et donnera une nouvelle impulsion au principe de l'autorité concentrée. Un homme quelconque se trouvant en France le mois dernier aurait cru que le pays (au moins dans la forme) était une monarchie. Les rues et la presse résonnaient d'acclamations à l'adresse, non pas d'une nation ni d'une constitution, mais d'une nation personnifiée par un chef. Le Parlement, les ministres, les autorités tombaient au second plan, insensiblement, mais inévitablement. La France se trouvait face à face avec un empereur, et, n'ayant personne autre, présentait à Sa Majesté, non pas les Chambres, mais Félix Faure.

Les Chambres, leurs présidents, les diverses autorités électorales peuvent grogner à leur aise, mais la France ne goûte guère leurs prétentions d'être des organes du pays. Tout ce que j'ai entendu ces jours derniers ne fait qu'enraciner plus profondément chez moi cette impression déjà vieille que le gouvernement parlementaire est un étranger exotique en France et n'y a ni racines, ni avenir. Quand la nation est réellement enthousiasmée (et elle l'a été par cette alliance nouvelle et capitale), elle oublie l'existence même des Chambres, des notabilités parlementaires et même des ministres. Ces derniers occupent en temps ordinaire une bonne part de l'attention publique; mais, aux grands moments de l'histoire nationale, les Chambres ne sont, aux yeux de nombre de citoyens tranquilles, qu'un scandale vivant et nuisible, bien loin d'être la personnification de la France. Je ne vois aucune possibilité de Révolution dynastique ou de



dictature; je ne vois aucun symptôme de tyrannie militaire, mais je perçois une tendance tranquille et ferme au gouvernement personnel. Une des plaisanteries du moment était la farce d'un nouveau riche et sa femme commandant un grand choix de meubles pour leur nouvel hôtel du Parc Monceau. « Le désirez-vous du style Louis XIV, Louis XV ou Empire? » demandait le fournisseur. Et la nouvelle châtelaine de répondre : « Style Félix Faure. » Paris s'amuse beaucoup de cette petite histoire, car Paris s'amuse de tout, choses et gens, à l'exception cependant du Tsar et de la Tsarine. Le sage citoyen qui représente la France avec tant de tact et de courtoisie est le précurseur sans doute de quelque chef populaire — peut-être encore attelé à la besogne dans son uniforme de lycéen.

Quant à la question Turque qui a ému l'Angleterre pendant des mois, on ne peut s'imaginer dans quelle absolue indifférence elle laissait la France à cette époque. On comprend difficilement comment cette nation qui a été de temps en temps si émue par les souffrances d'un peuple malade, se montre maintenant si insensible aux horribles récits de massacre et de tyrannie. C'est pourtant la vérité. Le sentiment uniforme des Français a été que la condition des chrétiens en Turquie est l'affaire de la Russie, en admettant que cela regarde les nations européennes; que la Russie a de bonnes raisons qui lui sont propres pour ne pas s'en mêler actuellement; que la France, comme alliée de la Russie, ne peut admettre que la politique russe en Orient soit un tant soit peu gênée pour tous les Arméniens du monde. « Ah! me disait un vieux républicain, nous avons assez fait au temps passé pour secourir les peuples opprimés et avons cruellement souffert d'être intervenus. Notre propre existence est maintenant le souci urgent et nous avons besoin de tous les hommes et de tous les amis que nous pouvons trouver. Les despotes orientaux sont habitués à massacrer et maltraiter toute race d'insurgés qui les menace, et ce n'est plus le rôle de la France de mettre l'ordre dans le monde. Dans cette question, nous agissons avec la Russie et ne permettrons pas que sa politique soit effleurée. »

Les Anglais qui, pendant un siècle, ont toujours ignoré l'effet du voisinage immédiat d'un puissant ennemi, n'ont jamais vu de conquérant dans leurs rues, ni bu la coupe de l'humiliation et du péril, ne peuvent avoir aucune idée de la passion de conservation de soi-même qui chasse toutes les autres préoccupations. Les habitants du continent actuel vivent comme des gens qui, ayant eu à subir un affreux tremblement de terre, prêtent l'oreille aux sourds grondements qui peuvent revenir. Nous autres, insulaires, occupés à nos nouveaux protectorats des mers d'Afrique ou d'Asie, avons des loisirs et de l'indignation de reste pour les horreurs de l'Arménie et les énormités de l'Assassin. La France et l'Allemagne disent que leur propre position en Europe et celle de leurs colonies est pour eux le principal, et que les intérêts qui en découlent ne doivent pas être négligés pour des crimes locaux accomplis en d'autres pays.

Pendant ce temps-là, l'opinion générale en France est que les cris des Anglais au sujet de l'Arménie ne sont qu'un simple prétexte pour empiéter davantage. Rien ne pourrait arrêter le torrent de railleries des Français à l'adresse de notre « hypocrisie », de notre « avidité » et de notre « perfidie ». La presse, et même des politiciens raisonnables, se livrent à des variations sur Chypre, l'Egypte, le Soudan, Burmah, la révolte indienne, le Nil, le Congo, l'Afrique du Sud, l'extermination des Matabélès avec la dynamite, et ainsi de suite. On peut être certain que toute tentative de l'Angleterre pour exercer seule une contrainte sur la Turquie rencontrerait une résistance active dans une coalition européenne où la France aurait assurément son rôle. Les périls prédits par Lord Rosebery dans son discours sans réplique, patriotique et sage, ne sont qu'une appréciation modérée de la catastrophe qu'une action isolée entraînerait pour l'Angleterre. Tout homme qui étudie l'opinion étrangère sur le continent pourrait se rendre compte de la proximité du désastre grave que nous aurions incité en provoquant la guerre d'une manière isolée.

Depuis que le Tsar a quitté la France, il s'est produit des symptômes de changement dans l'attitude de la Russie et de la France. Une réelle entente entre l'Angleterre, la Russie et

la France pourrait en vérité agir quelque peu pour faire face à une crise d'une extraordinaire difficulté et d'une incalculable portée, non seulement pour les chrétiens de l'Orient, mais aussi pour le reste de l'Europe. Peut-être le moment n'a-t-il jamais été plus opportun qu'à présent pour établir un accord réel entre l'Angleterre, la Russie et la France, dans le but d'éviter des dangers chroniques. Mais il est oiseux d'espérer que de simples mots doux auront quelque efficacité.

La France, aussi bien que la Russie, est maintenant trop fière, trop forte, trop confiante en elle-même, pour donner à l'Angleterre quelque chose gratis. Elle n'attaquera pas l'Allemagne, mais elle ne souffrira pas se laisser écarter par l'Angleterre, ni ne baissera ses prétentions d'être la première puissance dans la Méditerranée. Il y a un mot qu'un Anglais trouve toujours en tête d'un journal français et aux débats politiques. Il y a une pensée qui se trouve au plus profond des esprits français. Ce mot, cette pensée, c'est l'Égypte. L'Égypte est la condition *sine quâ non* de tout accord réel, de toute amitié ou coopération entre la France et l'Angleterre. L'Égypte peut ne pas être le prix entier, mais c'est le premier acompte que doit verser l'Angleterre, si elle désire véritablement sauver les chrétiens d'Orient. Chypre ne compte pas. L'Égypte est le prix réel de tout rapprochement amical avec nos plus proches voisins.

15 octobre, 1896.

Frédéric HARRISON.

---

## II. — LE POSITIVISME A LA PORTÉE DES ENFANTS

Si le Positivisme envisagé comme une théorie philosophique acquiert chaque jour de nouvelles sympathies, il s'en faut que les progrès de la religion de l'Humanité soient aussi sensibles. Je vais essayer de démontrer que la principale cause de ce fait tient à ce que la doctrine de Comte n'a pas été mise suffisamment à la portée des enfants. On convainc des

hommes en s'adressant à leur raison, mais c'est par le cœur qu'on doit conquérir les enfants ; or, il faut au cœur autre chose que des faits, il faut des idées poétiques, des hypothèses métaphysiques, du surnaturel, il faut des légendes et un objet d'adoration facile à concevoir, un Dieu fait homme, fils d'un Dieu personnel, créateur du ciel et de la terre et sans cesse préoccupé des moindres actions de ses créatures ; il faut pouvoir promettre aux orphelins, ainsi d'ailleurs qu'aux mères qui perdent leur enfant et ainsi qu'aux malades en proie à de cruelles souffrances, qu'un jour viendra où ils auront l'explication de ce qui leur semble une inégalité et une injustice, et qu'ils reconnaîtront qu'un Dieu bon leur a intentionnellement infligé ces tortures dans un intérêt supérieur. En ce qui concerne toutes ces promesses, il est impossible au Positivisme de les faire, même en se plaçant au point de vue charitable des médecins qui voilent la vérité à leurs malades ; une religion doit être véridique alors même qu'elle proclame des idées qui heurtent singulièrement les illusions dont on berce les enfants ; tant pis pour ceux qui n'ont pas l'honnêteté et la force de caractère de préférer la science à la foi dans les cas où l'une est en contradiction avec l'autre ; ils sont victimes des religions qui les trompent, nous ne pouvons que le déplorer. Mais je voudrais m'arrêter un peu plus longtemps sur la première partie des *desiderata* que je viens d'énumérer.

Ne voyons-nous pas autour de nous, en nombre considérable, des hommes d'élite qui acceptent toute la religion humanitaire, qui ne croient pas au Dieu personnel sans cesse hésitant à accorder ou à refuser une grâce suivant la ferveur des prières, auxquels il suffit de penser que leur être survivra, dans le cercle étroit de leur famille et de leurs amis et pour quelques-uns dans l'Humanité entière, qui n'ont pas la vanité de croire que leur âme survivra ailleurs que sur la terre, et qui voient dans les grandes idées de Comte une conception bien supérieure, plus grandiose et plus sublime que la conception égoïste de l'immortalité personnelle. Et cependant si nous nous demandons jusqu'à quel point leur foi est sincère, nous apprenons qu'ils font élever leurs enfants dans

les religions catholique, protestante, israélite, suivant qu'ils appartiennent eux-mêmes à l'une ou à l'autre de ces religions; le nombre de ceux qui donnent eux-mêmes à leurs enfants des idées qu'ils trouvent plus grandes, plus élevées que celles des prêtres, des pasteurs ou des rabbins est infiniment restreint. Demandons-leur une explication de leur conduite et voici ce qu'ils nous répondront : nous sommes avec vous en principe, mais votre religion est accessible aux hommes, elle est incompréhensible pour des enfants. Nous continuons à baptiser et à catéchiser les nôtres parce que nous croyons utile de donner en nourriture à leurs jeunes intelligences autre chose que des faits, vous n'avez pas de légendes poétiques, pas d'histoire merveilleuse qui frappe l'imagination et dont on puisse tirer des leçons de morale. Nous avons besoin de raconter à nos enfants qu'Adam et Eve ont été chassés du Paradis parce qu'ils avaient mangé une pomme et que Dieu arrêta le bras d'Abraham parce qu'il avait obéi et qu'il allait immoler son fils. Le jour où nos enfants auront quinze ans nous leur ouvrirons les yeux, nous leur ferons comprendre que l'Ancien et le Nouveau Testament sont un tissu de légendes et nous leur inculquerons des principes empruntés à la religion humanitaire. Voilà pourquoi nous conservons des attaches avec une religion comme le christianisme, par exemple, dont le rôle a été considérable dans la civilisation, alors même que nous convenons parfaitement qu'elle est actuellement une ennemie du progrès, qu'elle annihile un nombre considérable d'intelligences et qu'elle est en outre profondément immorale lorsqu'elle promet à ses adeptes une félicité éternelle en vue de laquelle, très égoïstement, prêtres et sœurs de charité renoncent à être des hommes et des femmes, se soustraient aux lois naturelles et sèment la discorde dans les familles.

Ayant à choisir entre l'absence complète de toute éducation religieuse, le Positivisme ou l'une des religions existantes, nous repoussons l'athéisme qui rabaisse l'homme au niveau des animaux, la religion positiviste, parce qu'elle n'est pas accessible aux enfants, au peuple et à tous les ignorants et faute de mieux nous nous résignons à laisser

enseigner à nos enfants des légendes miraculeuses, quitte à leur en montrer plus tard toute la vanité.

Si l'on veut chercher les conséquences d'une semblable conduite, voici ce que l'on voit :

Les enfants ainsi élevés se divisent en deux catégories : ceux qui ont été captés par les prêtres et qui s'éloignent de plus en plus de leur famille et ceux sur lesquels la prise de possession n'a pas été suffisante parce qu'elle était sagement contrebalancée dans la famille. Ce sont ces derniers seulement qui prennent la place de leurs parents dans la génération suivante et qui font à leur tour le raisonnement que j'exposais tout à l'heure lorsqu'ils ont à élever des enfants ; c'est ainsi que la religion positiviste qui aurait dû, dans l'espace d'un siècle, devenir au moins l'égale du christianisme n'est même pas encore reconnue par l'Etat d'une façon officielle et qu'en dehors des grands centres intellectuels on ignore même généralement son existence. Et il est à craindre que cet état de choses se perpétue longtemps. On répètera encore au siècle prochain : Le Positivisme ne manque ni de logique, ni d'équilibre, ni de morale, mais il n'a pas ce côté merveilleux qui attire les enfants et les femmes et jusqu'aux esprits forts le jour où minés par la fièvre et la souffrance, diminués dans leurs capacités intellectuelles, harcelés par leur entourage, ils disent *amen* aux prières que murmure un prêtre à leur lit de mort.

Un congrès des religions aura probablement lieu à Paris en 1900 et peut-être n'y aura-t-il pas une délégation positiviste pour imposer silence par sa présence même à ce congrès à tous ceux qui nous rangent avec mépris sous la bannière de l'athéisme, parce qu'ils ne peuvent pas concevoir une adoration lorsqu'elle n'a pas pour objet un Dieu personnel, créateur, vengeur et juste selon les uns, bon et compatissant selon les autres.

Cet état de choses persistera certainement aussi longtemps qu'on s'abstiendra de mettre la religion positiviste à la portée des enfants, il y a là une loi physiologique à laquelle nous ne pouvons pas nous soustraire. Que l'on me permette de l'exposer en deux mots :

Lorsqu'on étudie la physiologie du système nerveux, on apprend que nos mouvements se divisent en volontaires et réflexes ; on appelle mouvements réflexes ceux qui succèdent immédiatement à une excitation avant que le cerveau en ait conscience, et volontaires ceux qui paraissent répondre à une volition du moi. Or, il est facile de s'apercevoir que les mouvements soi-disant volontaires ne sont que des réflexes très modifiés. Nous ne faisons pas un mouvement, et nous ne prononçons pas une parole sans avoir été poussés par une idée ; il se peut que cette idée ait été emmagasinée pendant fort longtemps dans notre mémoire, mais c'est elle néanmoins qui est l'équivalent d'une excitation dans un mouvement réflexe. Lorsque ces mouvements réflexes supérieurs se sont produits un certain nombre de fois, ils s'accomplissent de plus en plus facilement et deviennent comparables aux réflexes ordinaires ; la sagesse des nations a exprimé ce fait par le proverbe bien connu : l'habitude est une seconde nature. Or, toute l'éducation de l'enfant consiste à lui donner des habitudes ; on crée artificiellement dans de jeunes cellules cérébrales un certain nombre de réflexes psychiques, on façonne, on organise par l'éducation les cerveaux des enfants de telle sorte qu'ils ne sont plus transformables que par une seconde éducation aussi longue que la première.

Ce n'est donc pas sur une terre vierge qu'à l'âge de 15 ou 20 ans on sèmera les doctrines de Comte, c'est sur une terre rebelle où en général la semence ne germera plus. Il y a donc une lacune à combler, une bien petite lacune si l'on envisage l'immensité des travaux de Comte, mais lacune considérable si l'on songe à ses conséquences. Il faut à tout prix trouver un moyen de mettre le Positivisme à la portée des enfants, il faut que la religion positiviste se substitue à toutes celles qui séparent actuellement des êtres faits pour s'entendre, car nous vivons encore sous un régime de guerre religieuse ; dans les pays moins avancés que le nôtre, on massacre encore ceux qui ne partagent pas les croyances des majorités, et dans l'Europe occidentale où l'on réprouve ces meurtres, il n'est pas indiscutable que, si l'on avait la certitude de l'impunité, on n'imiterait pas ces exemples odieux.

Mais pour arriver au résultat que j'appelle de tous mes vœux, pour faire du Positivisme une religion que l'on puisse enseigner aux enfants et au peuple, quel est le moyen à employer et comment concevoir une addition à la religion de Comte ?

Je crois que la chose n'est pas impossible et il me semble que l'une des premières tentatives à faire serait celle que je vais exposer :

Il s'agirait de rédiger dans un style très simple des faits merveilleux, empruntés à la science et qui plongeraient l'esprit dans une admiration contemplative de la nature ; ces faits frapperaient très vivement l'imagination, il serait impossible de ne pas y penser souvent, ils deviendraient une véritable préoccupation pour l'esprit. Ils pourraient être réunis dans un recueil qu'on donnerait aux enfants et ils se graveraient dans leur mémoire, en lieu et place des miracles bibliques. Ils constitueraient une légende du Positivisme, ils en montreraient le côté éminemment poétique, et c'est dans cette lecture que les cœurs désabusés et les malades attristés viendraient trouver une harmonie qui les bercerait et une source jaillissante de vie qui leur donnerait une force nouvelle.

Ce livre, destiné à remplacer la Bible, devrait être à la fois un exposé de nos connaissances scientifiques élémentaires, un traité de morale pratique et un résumé de l'histoire de l'Humanité. Après un chapitre sur la Genèse telle que les géologues nous l'ont enseignée et dans lequel on ferait une large part à la description des animaux et des plantes préhistoriques, viendrait une étude du monde où l'on ferait connaître les lois de la gravitation universelle en insistant sur les distances phénoménales qui séparent les astres, puis on exposerait les voyages d'une goutte d'eau sur notre planète, on raconterait comment la chute d'une pomme sur la tête de Newton l'amena à la découverte des lois de l'attraction, on parlerait du cerf-volant de Franklin et on montrerait comment l'électricité captée par l'homme se transmet dans les fils du télégraphe et du téléphone, on n'oublierait pas de mentionner le cri poussé par Archimède lorsqu'il découvrit la



loi de la densité des corps. Enfin on aborderait les problèmes de la vie en mettant bien en évidence le grand principe que rien ne se perd et que rien ne se crée, mais que tout se transforme. On étudierait les métamorphoses des papillons et le mutuel appui des plantes et des animaux pour la production de l'acide carbonique et la régénération de l'oxygène ; dans un chapitre d'histoire on résumerait la mythologie grecque, latine et scandinave et l'on mettrait au même rang la légende des rois mages guidés par l'étoile de Bethléem vers l'étable de Jésus ; on montrerait par une série d'exemples bien choisis à quel point il est vrai que les vivants sont gouvernés par les morts, on ferait comprendre à chacun le rôle considérable qu'il peut jouer dans ses différents états de fils, frère, époux, père ou de fille, sœur, épouse et mère et l'on terminerait par un décalogue inspiré d'une morale sans obligation ni sanction.

On m'objectera qu'il existe déjà une quantité de livres de vulgarisation dans lesquels les grandes lois de la nature sont exposées en un style accessible aux intelligences des enfants et du peuple, on me dira que nombre de pages émanées d'Auguste Comte lui-même pourraient être copiées textuellement ; que Guyau a déjà fait un traité de morale sans obligation ni sanction. Je ne l'ignore pas et je crois bien qu'il serait sage de ne pas vouloir refaire ce qui est bien fait, mais on m'accordera qu'un livre unique, tel que je le conçois n'existe nulle part et qu'il comblerait une lacune regrettable dans l'œuvre impérissable d'Auguste Comte. Malheureusement je ne crois pas qu'il soit possible à un seul homme de mener à bien une entreprise pareille, il faut la collaboration de plusieurs. Je n'ai voulu donner qu'une idée de celui que je conçois, mais il serait nécessaire d'arrêter en commun le plan d'un pareil ouvrage, il faudrait que les uns apportassent des matériaux et qu'un La Fontaine ou un Perrault voulût se charger de la rédaction. Il faudrait faire appel à toutes les bonnes volontés et, par exemple, cette Revue pourrait être l'organe où seraient centralisés pendant quelque temps les documents qui lui seraient envoyés.

Voilà une idée que je propose à la méditation de tous les Positivistes en espérant qu'elle germera et qu'elle portera des fruits.

D<sup>r</sup> Louis DOR.

A l'appui de la communication si intéressante de M. Dor, nous croyons devoir reproduire les quelques pages que M. Pierre Laffitte a consacrées au même sujet dans sa leçon sur la *Théorie de l'Éducation de la seconde enfance*, professée à la salle Gerson, le 13 décembre 1885 et publiée par la *Revue Occidentale* du 1<sup>er</sup> juillet 1886.

Cette reproduction ne saurait d'ailleurs dispenser ceux qui voudraient étudier l'important problème posé dans ces pages, de lire et de méditer les profondes considérations exposées par notre Maître dans le reste de la leçon et dans les leçons précédentes. C. H.

TABLEAU GÉNÉRAL DES CONNAISSANCES A ACQUÉRIR  
PENDANT LA SECONDE ENFANCE.

Dans cette phase il faut, outre la culture logique, faire acquérir à l'enfant l'ensemble des connaissances que systématisera l'enseignement philosophique qui devra être donné de 14 à 21 ans. Il y a là une question très délicate qu'Auguste Comte n'a pas abordée, mais à laquelle il aurait été conduit nécessairement par la nécessité même de la construction effective de la morale pratique. Il est certain, en effet, que, quand on considère l'ensemble immense de la philosophie positive, réduite même à ses conceptions les plus essentielles, il semble véritablement impossible de jamais pouvoir la faire comprendre aux adolescents même les mieux doués, et à plus forte raison aux jeunes prolétaires dont la disponibilité est nécessairement moindre. Dès lors comme l'ensemble de ces connaissances est néanmoins indispensable pour faire des citoyens qui puissent vivre dans la société actuelle avec son degré extrême de complication, on se trouve ainsi acculé à une véritable impossibilité. La contradiction ne peut être résolue qu'en montrant la possibilité de faire acquérir, pendant la seconde enfance, non seulement les connaissances concrètes relatives aux êtres, mais aussi, ce qui est le point nouveau de notre théorie, un ensemble de connaissances des lois abstraites qui rendra possible la systématisation dogmatique propre à l'adolescence. C'est là le nœud capital du système d'instruction positiviste, et tant qu'il n'avait pas été dénoué, notre action devenait presque impossible. C'est maintenant ce qu'il faut nous expliquer avec soin, quoique sommairement.

Mais d'abord traçons le tableau général de la raison hu-

maine. La raison humaine se compose des connaissances relatives aux êtres, ce qui constitue la *raison concrète*, et des connaissances coordonnées relatives aux lois propres aux phénomènes, ce qui constitue la raison abstraite proprement dite. L'harmonie mentale consiste dans le convenable équilibre qui doit exister entre la raison abstraite et la raison concrète ou entre la théorie et la pratique. La *raison abstraite* se compose de la philosophie première, c'est-à-dire des lois communes aux divers ordres de phénomènes et de la philosophie seconde, qui contient les lois propres aux divers ordres de phénomènes, suivant la hiérarchie : mathématique, astronomie, physique, chimie, biologie, sociologie et morale. La *raison concrète*, quand elle est coordonnée, donne lieu à la philosophie troisième dont j'ai déjà donné un premier plan systématique. Tous les êtres quelconques se coordonnent, en effet, autour de la Terre et de l'Humanité dont l'activité consiste essentiellement à modifier la Terre pour l'adapter à la meilleure satisfaction de nos besoins. L'ordre d'évolution, dans l'espèce humaine, consiste à aller de la raison concrète à la raison abstraite, c'est-à-dire de la connaissance des êtres à celle des événements, pour arriver à leur harmonie finale. L'évolution de l'individu répète celle de l'espèce : il faut donc que pendant la seconde enfance l'individu acquière d'abord les connaissances concrètes, puis un ensemble suffisamment étendu des connaissances abstraites, pour que pendant l'adolescence l'harmonie mentale s'établisse par l'enseignement systématique. Mais il est évident que pour que l'individu, dans un temps si court, rattrape l'espèce, il faut que l'évolution de l'instruction ne soit pas seulement spontanée, mais bien dirigée avec des conceptions systématiques qui puissent, pendant la période de la seconde enfance, faire acquérir à l'enfant les principales conceptions que l'Humanité a mis tant de temps à acquérir.

Rappelons le tableau de la raison concrète, car il sera absolument nécessaire pour diriger à cet égard l'instruction de la seconde enfance, quant aux connaissances relatives à la Terre et à l'Humanité. L'étude de la Terre comporte d'abord celle de la planète en elle-même, et en second lieu celle des

êtres vivants qui sont à sa surface. Donnons d'abord le tableau général de la théorie de la Terre pour diriger, dans la seconde enfance, l'ensemble des connaissances qui y sont relatives :

|       |   |               |
|-------|---|---------------|
| Terre | { | Géologie.     |
|       |   | Météorologie. |
|       |   | Astrologie.   |

Mais il faut pour cela que le Fétichisme de la première enfance, qui se condense dans l'amour de la maison, s'étende désormais à l'amour de la Terre.

C'est alors que le culte de la Terre, tel que l'a conçu Auguste Comte, se combinera avec l'étude de cette Terre, à laquelle l'enfant se trouvera initié. Il est bien entendu que, dans cette combinaison intime du sentiment et de la connaissance, il devra suivre la succession graduelle : Commune, Patrie, Terre.

De sept à quatorze ans, on l'initiera à des connaissances de plus en plus précises, comme de plus en plus étendues, relatives à la géologie, à la météorologie et à l'astrologie. Il va sans dire qu'il faudra toujours respecter le grand principe de lui faire apprendre *bien* plutôt que *beaucoup*, et de déterminer les choses fondamentales autour desquelles l'enfant groupera plus tard, suivant ses besoins, les connaissances complémentaires. Pour la géologie, il faudra d'abord faire connaître à l'enfant la forme de la Terre qu'il acceptera de confiance, et qu'il faudra lui représenter sur une mappemonde ; lui faire connaître la grande décomposition en mers et continents, et les grandes lignes de partage des eaux ; puis il faudra l'initier à la connaissance et à l'emploi des cartes géographiques par l'étude de sa commune, des communes environnantes et même de son département. Il est utile qu'il sache se guider au moyen de la carte, mais l'essentiel est d'éviter les détails oiseux ; ce sera à lui plus tard, quand il en aura besoin, à compléter les connaissances générales très précises par des détails plus étendus. C'est surtout par lui-même, en lisant l'histoire, toujours avec une carte, qu'il précisera les détails au degré nécessaire. Il faut surtout habituer l'enfant, quand il apprend un nouveau détail, par des circonstances plus ou moins fortuites,

à le subordonner à la figure générale du pays, qu'il rattache ensuite à la figure générale de la Terre, de manière à avoir toujours la coordination du détail avec l'ensemble.

Puis de l'étude de la forme de la Terre on passe à celle de sa constitution, réduite essentiellement à celle de la pellicule relativement légère qui sert de base à toute l'existence de notre espèce. On lui donnera une connaissance précise des terres, des minéraux, des pierres, etc., par l'étude du terrain même du pays, en précisant plus qu'en étendant les connaissances, lesquelles seront d'abord essentiellement concrètes et expérimentales dans la première partie de la seconde enfance, de sept à dix ans. On n'en donnera la coordination systématique que dans la seconde partie de la seconde enfance de dix à quatorze ans.

Mais cette Terre, ainsi conçue dans sa forme et sa constitution, est entourée d'une masse gazeuse nommée atmosphère, dont l'activité donne lieu aux phénomènes de la *météorologie*. C'est la seconde partie de l'étude de la Terre. On donnera d'abord à l'enfant des notions concrètes, sans coordination, relatives aux vents, à la pluie, à la grêle, au tonnerre, à la rosée, à la neige, etc. A ces notions précises relatives à ces divers ordres de phénomènes, on donnera une coordination dans la deuxième partie de la seconde enfance, en s'appuyant surtout sur des connaissances tirées de la physique abstraite. Ainsi, le point capital, trop méconnu, sera de lui donner l'idée précise d'un fluide élastique. L'élasticité constante est, en effet, l'attribut caractéristique du gaz. On a trop oublié le grand effort historique qui, au xvii<sup>e</sup> siècle, a mis cette propriété nouvelle en évidence; et j'ai vu des savants, du reste fort distingués, avoir là-dessus des idées confuses. Un gaz est un système de points liés entre eux qui tendent constamment à s'éloigner les uns des autres avec une intensité variable suivant des lois déterminées. On pourrait employer pour les enfants l'expérience fameuse par laquelle Pascal, en s'élevant sur le haut de la tour de Saint-Jacques-la-Boucherie, a mis en évidence l'élasticité de l'air. Cette expérience consiste à enfermer de l'air dans une vessie, puis à faire remarquer que, à mesure qu'on s'élève, elle se gonfle de plus

en plus. Cette ébauche de systématisation de la météorologie suppose une connaissance des principaux instruments institués par la physique abstraite. Il faudra faire comprendre à l'enfant la solidarité des phénomènes météorologiques, en même temps que l'influence des particularités propres à chaque pays et au sien en particulier.

On complètera l'étude directe de la Terre, d'après le plan que j'en ai donné l'an dernier dans la *Revue occidentale*, par l'*astrologie* ; c'est-à-dire l'étude des astres dans leurs rapports avec la Terre. Cette étude représente, sous une forme plus complète et plus systématique, bien entendu, ce qui, dans l'évolution de l'espèce, correspond aux études astronomiques qui ont précédé l'astronomie grecque, c'est-à-dire l'astronomie scientifique et abstraite. Après avoir fait bien comprendre à l'enfant la distinction entre le soleil, la lune et les étoiles, on lui fera constater dans celles-ci la *permanence des aspects* et on lui fera connaître avec plus de précision que d'étendue les principales constellations qui en résultent. On lui fera voir comment il peut, par ce moyen, et surtout à l'aide de l'étoile polaire, se diriger la nuit. Puis, par l'observation, on lui fera constater la différence entre les étoiles et les planètes, en faisant porter surtout son attention sur Vénus et Jupiter, les plus faciles à étudier. Enfin, sur un plan horizontal, on lui fera tracer une méridienne, au moyen de la perpendiculaire menée sur les lignes parallèles des levers et des couchers. On lui fera étudier, par observation, la marche du soleil ; au moyen de la variation des points de lever et de coucher de cet astre, on pourra lui faire déterminer approximativement, au moins en jours entiers, la durée de l'année. On lui fera étudier ensuite les phases de la lune et déterminer, par l'observation, la durée de la révolution synodique. Outre les notions ainsi acquises, on développera dans l'enfant l'esprit d'observation et une première ébauche de l'observation scientifique. Le plan horizontal lui apprendra à rapporter les positions à des positions fixes, et l'emploi de la règle ou des pinnules, pour viser l'astre, lui donnera la première ébauche de la méthode artificielle d'observation, base de toute science. Enfin on l'initiera à la première

mesure artificielle du temps par les clipsydres. Dans la seconde partie de la seconde enfance, de dix à quatorze ans, on lui donnera alors une connaissance plus systématique des résultats obtenus sur la constitution du soleil et sur celle des étoiles.

La seconde partie de l'étude de la Terre consiste dans celle des végétaux et des animaux qui sont à sa surface, de même que dans la conception de l'harmonie totale de tous les Etres avec la Terre ; c'est là ce que j'ai établi dans mon plan général de philosophie troisième. Cette vue systématique va nous servir à diriger cette partie de l'instruction de la seconde enfance.

D'abord, pour l'étude des végétaux, il faut, au début surtout de la seconde enfance, faire connaître d'une manière concrète et précise ceux du pays et de leurs divers emplois ; appeler ensuite l'attention sur ceux qui proviennent des pays étrangers et dont on fait usage soit pour la nourriture, soit pour l'habillement. On pose ainsi dans la tête de l'enfant les bases d'une véritable étude de l'histoire naturelle des végétaux, qui s'accomplit surtout dans la seconde partie de la seconde enfance. La même marche doit être employée simultanément à la connaissance des animaux et à leur histoire naturelle. Un pareil enseignement sera dirigé par l'heureuse et importante conception du docteur A. Second. Il s'est, en effet, proposé de réduire la connaissance de la hiérarchie animale à un certain nombre de types, la connaissance très précise de ces types permettant ensuite d'étudier ceux dont on peut avoir plus spécialement besoin. Une telle conception est très propre à faciliter même en dehors de l'enseignement les hautes méditations de la biologie abstraite. Il est donc bien désirable que ce biologiste termine ce grand travail ; et il serait bien désirable aussi que l'organisation systématique de l'enseignement positiviste, 10, rue Monsieur-le-Prince, permit d'en faire une première réalisation.

Il faudra exposer ensuite la répartition des êtres vivants, végétaux et animaux, à la surface de la planète tant sur la terre que sur la mer. Puis on donnera ensuite un aperçu général de l'harmonie de tous les êtres, organiques ou inorganiques, à la surface de la planète.

Il faudra, d'après la conception générale de la philosophie troisième, initier l'enfant à la connaissance effective des nations qui tendent spontanément à constituer l'Humanité ; ce que le Positivisme réalisera systématiquement. L'étude devra se faire toujours de la même manière. L'enfant sera initié à la connaissance de la Commune, dans son présent comme dans son passé, de la Patrie, de l'Occident et, enfin, successivement des principales nations de la planète. Les notions doivent être, comme toujours, plus précises qu'étendues. Puis, dans la seconde période de la seconde enfance, on donnera, dans le même ordre, une connaissance sommaire mais coordonnée de ces diverses nations. La lecture des divers poètes, des principaux historiens et voyageurs, sera le complément naturel d'un tel enseignement.

Quant aux grands hommes des divers pays, leur connaissance systématique devra être dirigée d'après le calendrier positiviste ; et la biographie entreprise par nos confrères britanniques, sous la direction de M. F. Harrison, sera pour atteindre ce but un précieux instrument. Du reste, le culte concret positiviste, quand il sera institué, sera une source heureuse et féconde de véritable instruction à ce sujet.

Mais il ne suffit pas de connaître la Terre et l'Humanité qui se développe à sa surface, il faut être initié aussi à la connaissance de l'industrie, c'est-à-dire de la réaction systématique de l'Humanité sur la Terre. On initiera l'enfant d'abord à la connaissance des machines simples, le levier et le plan incliné ; on le fera réfléchir sur la nature des services continus qu'elles rendent. On lui fera connaître ensuite les industries du pays même, agricole, manufacturière et commerciale. Sur cette solide base spéciale et concrète, on pourra, dans la deuxième période de la seconde enfance, donner un conspectus général de l'industrie humaine.

Mais le point capital, à bien comprendre, c'est la nécessité d'initier l'individu pendant la seconde enfance à une connaissance empirique, quoique coordonnée, de toutes les principales conceptions de la philosophie seconde, depuis la philosophie première jusqu'à la morale inclusivement. C'est là, comme je l'ai déjà remarqué, un point nouveau et capital



sans lequel l'enseignement systématique pendant l'adolescence deviendrait absolument incompréhensible. Il faut donc donner ici un tableau sommaire de cette initiation de l'enfant à la philosophie seconde ; ce qui composerait, du reste, un travail spécial que j'accomplirai peut-être. Il faut d'abord faire connaître à l'enfant, dans la deuxième période de la seconde enfance, l'énoncé des lois de la philosophie première avec des exemples très peu nombreux mais très simples. Ainsi, par exemple, la loi de la persistance ; il sera très facile de lui en montrer des vérifications soit dans le monde inorganique, soit dans le monde moral. Il en est de même de la loi qui établit l'équivalence entre l'action et la réaction.

Quant à la philosophie seconde, il est évident qu'on peut l'initier aux conceptions principales de la logique : en premier lieu la numération, les principales opérations de l'arithmétique, habituellement d'une manière pratique mais aussi avec des démonstrations dans les cas les plus simples. On fera trouver à l'enfant, par induction, la loi des permutations et même celle des arrangements. On lui fera voir comment l'idée de rapport se précise et se mesure au moyen de la fraction, et il faudra l'initier aux principales règles de trois. En géométrie, il faudra lui faire trouver par l'expérience les principales notions fondamentales. Ainsi, par exemple, vérifier que la plus courte distance entre deux points est une ligne droite, que la distance minimum d'un point à une droite est la perpendiculaire menée du point à la droite. On pourra lui faire trouver par induction le *Postulatum* d'Euclide, à savoir : que, quand deux droites sont, l'une perpendiculaire et l'autre oblique sur une troisième, elles doivent nécessairement se rencontrer. Il est, du reste, curieux, historiquement, de constater que Legendre avait déjà fait une telle tentative. Legendre a fait toutes sortes de tentatives, depuis la première édition de son *Traité de géométrie* en 1794, pour établir une théorie satisfaisante des parallèles. Dans la neuvième édition, publiée en 1812, il se décida à démontrer le *Postulatum* d'Euclide expérimentalement, en faisant voir par des mesures exactes que le déplacement double, triple, sur l'oblique donnait lieu à des

projections doubles et triples sur la ligne que rencontrent la perpendiculaire et l'oblique dont il faut établir le concours nécessaire. On devra faire démontrer à l'enfant expérimentalement le théorème de Thalès sur ce que la somme des trois angles d'un triangle égale deux droits. Pour cela, en prenant un grand nombre de triangles différents, on lui fera construire, autour d'un point, successivement, les trois angles de ce triangle et on lui fera constater que, dans tous les cas, les côtés extérieurs sont en ligne droite. Puis, sur ce cas spécial, on lui fera comprendre la notion de *loi*, soit sous la forme de la constance dans la variété, ce qui donne la relation :  $A + B + C = 2^{\text{dr}}$ , soit sous la forme de la fonction, c'est-à-dire d'une quantité qui varie régulièrement au moyen d'autres, idée que fournit la relation :  $A = 2^{\text{dr}} - (B + C)$ . On lui fera connaître, par la pratique, les quadratures polygonales planes, la quadrature du cercle et sa rectification. On lui fera trouver, par exemple, expérimentalement, que le rapport de la circonférence au diamètre est constant, et on lui fera trouver par cette méthode une valeur approximative de ce rapport. On lui fera vérifier, aussi par l'expérience, le théorème de Thalès sur la proportionnalité des côtés des triangles équiangles, et on lui fera faire des applications à la détermination indirecte des longueurs qu'on ne peut pas déterminer directement. Sans que j'insiste davantage, l'exposition actuelle ne le comportant pas, on voit comment l'enfant sera initié aussi aux principales cubatures. Enfin, on lui fera connaître la conception des coordonnées et leurs principales applications. Puis, logiquement, au moyen d'une telle étude des phénomènes géométriques, on lui fera comprendre ce que c'est que l'induction, la déduction, l'observation et l'expérimentation. Comme résultat d'un tel enseignement, on précisera dans son esprit la notion de loi et celle de fonction; ce qui conduira à une ébauche pratique et, secondairement, théorique de l'algèbre elle-même. On procédera d'une manière analogue pour initier l'enfant aux principales conceptions du troisième degré de la logique : la mécanique. On lui énoncera les lois relatives aux machines simples et on les lui fera vérifier expérimentalement, puis on lui donnera des notions générales sur les mouvements, et on

lui fera vérifier expérimentalement, par le plan incliné, celles qui se rapportent au mouvement uniformément varié, déterminé par la pesanteur. On pourra même s'élever jusqu'à lui donner une certaine idée de la notion de *système*.

Voyons maintenant, d'une manière extrêmement sommaire, comment il faudra lui faire connaître les principales conceptions de la cosmologie, astronomie, physique et chimie.

Pour l'astronomie, on lui apprendra à tracer une méridienne, à faire, avec des instruments analogues à ceux d'Hipparque, des observations sur les longitudes et les latitudes du soleil aux diverses époques de l'année; on lui fera connaître la théorie du calendrier; puis, on l'initiera aux notions essentielles relatives aux principales planètes, ainsi qu'à la théorie des éclipses. Quant à la physique, il faudra en grouper les notions essentielles autour de la conception des principaux instruments; ainsi en barologie, autour des notions des aéromètres, du baromètre, etc. On lui fera vérifier les principales lois relatives à la pression des liquides sur les vases, et ainsi de suite. En thermologie, après avoir établi par l'expérience l'existence des changements de forme, corrélatifs à ceux de la chaleur, on lui donnera la théorie du thermomètre, en insistant spécialement sur le grand principe de la comparabilité des observations. Puis, on lui fera connaître l'hygromètre, les vérifications expérimentales des lois des mélanges des gaz et celles relatives au mélange des gaz et des vapeurs. Il faudra insister sur la conception des manomètres. En chimie, il faudra surtout, par des expériences simples, l'initier à la décomposition de l'air et de l'eau, et aux conséquences qui en résultent, à la notion des corps simples, enfin à la théorie de la nomenclature. Pour la cosmologie, de même que pour les notions précédentes, je rappellerai toujours qu'il faut préférer la précision des connaissances à leur étendue. Enfin, il faudra l'initier aussi aux lois de la morale abstraite dans ses trois degrés successifs : biologie, sociologie et morale proprement dite. Appliquant la notion de similitude aux organismes vivants, surtout animaux, on le conduira à la notion abstraite de type, d'organe et d'appareil. Ces notions abstraites doivent toujours avoir pour base la série des notions concrètes qu'on lui a fait

acquérir. Puis, on l'initiera, par une analyse analogue, à la connaissance abstraite des principaux phénomènes physiologiques, pour le conduire enfin à la conception finale de la vie, d'après les vues de Blainville et d'Auguste Comte.

En sociologie, en s'appuyant sur les connaissances historiques concrètes, on l'initiera aux conceptions abstraites de la Famille et de la Société. On lui en fera connaître les principales lois, en les précisant par une série d'exemples convenablement choisis dans les diverses civilisations. Enfin, on lui fera comprendre la grande loi de la division des fonctions et de leur hiérarchie naturelle. Abordant ensuite la dynamique sociale, on lui fera acquérir la notion objective d'évolution, complétée par la conception subjective des progrès. On lui indiquera les lois fondamentales d'évolution de l'intelligence, de l'activité et du sentiment, et on complètera enfin par l'ébauche générale de l'évolution de l'Humanité. Enfin, on l'initiera aux principales lois de la morale abstraite. On commencera par quelques notions relatives à la morale théorique, qu'il sera facile de dégager de l'exposition que j'en ai faite. On terminera enfin par la conception de la marche naturelle de l'évolution humaine, de la naissance à la mort; de manière que le but de notre destinée lui apparaisse avec assez de précision et pour qu'il puisse en désirer la systématisation.

---

### III. — M. PIERRE LAFFITTE.

Nous extrayons d'un ouvrage encore inédit de M. Wechniakof les lignes suivantes qui ont trait à notre maître M. Pierre Laffitte. Nous en signalons l'originalité, mais en faisant toutes nos réserves quant aux opinions de son auteur.

En effet, nous considérons que M. Laffitte a été désigné comme le successeur et le continuateur d'Auguste Comte; que, par conséquent, il devait, comme il l'a toujours fait, marquer sa filiation directe avec le grand philosophe, et considérer chacun de ses actes comme le développement de la grande tradition positiviste. Malgré que le point de vue de M. Wechniakof soit tout différent, son appréciation pourra paraître curieuse et intéressante :

Par l'ampleur, l'entrain, la verve, la souplesse de ses discours et de ses communications et par une certaine tendance à se fragmenter, c'est un *Diderot* renouvelé du *xix<sup>e</sup>* siècle; mais un *Diderot* discipliné par l'œuvre grandiose de son maître *Auguste Comte*. Cependant, il exagère sa soumission à cette discipline en s'efforçant de faire entrer ses conceptions les plus personnelles et les plus originales dans les mailles rigides et inflexibles du réseau forgé par son maître. Il méconnaît sa propre originalité universelle, qui l'élève à la hauteur de son maître. Au point de vue de la méconnaissance de la portée hors ligne de son originalité encyclopédique, il contraste avec le penseur encyclopédique si vigoureux et incisif, le berlinois Eugène Dühring (d'origine suédoise par son père) qui apprécie avec un hautain mépris les penseurs de notre siècle et un grand nombre des célébrités les plus classiques des temps passés comme Leibnitz et Kant; Dühring ne considère que Comte seul, comme un véritable philosophe du *xix<sup>e</sup>* siècle, mais il admire davantage son caractère noble et indépendant que son rôle purement scientifique. Il ne connaît ni M. Laffitte ni son œuvre.

Vu l'extrême multiplicité et la variété des travaux de M. Pierre Laffitte, qui semble s'attacher surtout aux applications morales et sociales, la postérité sera peut-être condamnée à ne pouvoir jamais lire ses leçons d'ordre scientifique proprement dit, qu'il tarde à publier. Je citerai parmi ses cours professés depuis longtemps, et qui tardent à être publiés, ses cours sur la *philosophie moderne*, sur le régime et le rôle civilisateur de la Restauration dans son cours sur la *théorie de la Révolution* et surtout ses deux cours à caractère le plus strictement scientifique sur la *théorie de l'Industrie* professée en 20 leçons de 1888 à 1889, et la partie la plus brillante et la plus originale de son cours officiel au Collège de France : l'introduction en cinq chapitres de son cours de l'*Histoire générale des Sciences* professé du 21 juin 1892 au 18 mars 1893 en 40 leçons.

*Extrait de la Biologie comparée des Savants,*  
de M. Th. Wechniakof).

---

## IV. — PERPÉTUITÉ.

Sur ce vaste Océan du monde  
Où s'agite chacun de nous,  
C'est un continuel remous  
D'êtres qui passent comme une onde.

L'homme, atome d'une seconde,  
Disparaît; mais, dans le grand Tout,  
L'Humanité reste debout,  
Toujours vive, toujours féconde.

La nature, sans un remords,  
Chaque jour entasse les morts  
Sous l'herbe verte des prairies,

Et l'on voit courir, triomphants,  
Dans les promenades fleuries  
Les éternels petits enfants.

Georges GILLET.

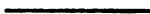

## BIBLIOGRAPHIE

---

### I

**Die Probleme im Begriff der Gesellschaft bei Auguste Comte in Gesamttzusammenhange seines Systems. Inaugural-Dissertation des philosophischen Fakultät zu Jena zur Erlangung des Doctorwürde vorgelegt** (Les Problèmes relatifs à l'idée d'Auguste Comte sur la Société dans ses rapports avec l'ensemble de son système. *Dissertation inaugurale présentée à la Faculté de philosophie d'Iéna pour l'obtention du titre de docteur*), von Hermann Lietz. Broch. in-8°. Leipzig, Gustav Fock. 1891.

La soutenance, devant une Faculté allemande, d'une thèse de philosophie sur le Positivisme, est un fait curieux et intéressant, digne à tous égards d'être signalé, ne serait-ce que parce qu'il nous apporte une preuve nouvelle de la pénétration de la doctrine de Comte dans un pays qui y est demeuré très longtemps réfractaire. Cette pénétration tardive est, à notre gré, trop lente, et l'on ne saurait admettre que cette lenteur soit uniquement due à la difficulté de se renseigner ; car, outre quelques publications, dont quelques-unes très intéressantes, où l'œuvre du grand philosophe français est analysée et appréciée, il existe chez nos voisins deux traductions importantes : celle du résumé fait par M. Rig, du *Cours de philosophie positive* et celle du *Catéchisme positiviste*. Le public allemand possède donc, dans sa langue, deux ouvrages dans lesquels sont condensées les idées capitales de Comte.

Tous ceux qui sont convaincus de la supériorité de ces idées sur celles qui ont généralement cours en Allemagne et, surtout, dans ses Universités, ne peuvent que souhaiter de voir ces deux traductions dans le plus de mains possible. Ils n'en espèrent pas des résultats immédiats ; la semence intellectuelle est longue à germer, surtout en un terrain ingrat. Mais n'oublions pas que l'Allemagne, comme tous les pays de l'Europe et même du Nouveau Monde, traverse une sorte de crise spirituelle dont il appartient à ses penseurs de trouver le remède. Et il s'en trouvera

bien, tôt ou tard, quelques-uns qui, ne le trouvant dans aucune des doctrines du passé, toutes plus ou moins entachées de métaphysique, le chercheront dans le Positivisme dont la conception relative du monde et de la société est seule capable de leur fournir la solution des graves et pressants problèmes, passion et tourment des générations actuelles.

Tel n'est peut-être pas tout à fait le sentiment de M. Lietz, car il n'accepte pas sans réserve la doctrine de Comte ; mais il professe pour l'homme une admiration profonde qu'il exprime, dès les premières pages de sa thèse, dans les termes suivants : « ..... Et, en fait, Auguste Comte doit être signalé comme philosophe social et pratique dans le sens le plus élevé, le meilleur du mot. Il est le plus grand philosophe français de ce siècle, peut-être le plus grand philosophe social surtout de ce siècle, puisqu'il a fondé la sociologie dans son grand ouvrage, le *Cours de philosophie positive*, dont les trois derniers volumes lui sont consacrés (p. 8). » Et plus loin (p. 60), il établit un parallèle entre Kant et Comte, que nous nous faisons un devoir de traduire :

« ..... Tous deux furent, indépendamment l'un de l'autre, des adversaires de la métaphysique, tels qu'elle n'en eut jamais de plus grands ni de plus rudes ; tous deux marchèrent donc dans la même voie jusqu'à un point déterminé. Comte considère, de même que Kant, le monde, tel qu'il nous apparaît, comme purement phénoménal ; mais pour lui — et en cela il diffère de Kant — nous ne pouvons jamais rien savoir sur l'origine et la fin des choses, ni sur leur essence intime. Les positions qu'ils sont obligés d'abandonner dans le champ de la métaphysique et de la religion — de façon sans doute très différente, et Comte partout plus radicalement et bien des fois plus logiquement — tous deux cherchent à les reconquérir résolument sur le terrain de la morale. Là, ils se rencontrent de nouveau d'une façon étonnante sur les points essentiels ; tous deux, en effet, sont des enthousiastes du devoir — Comte toutefois à un point de vue plus concret et plus accentué en ce qui concerne les questions sociales et le travail ; — tous deux aussi sont des adversaires sans pitié de l'égoïsme et de l'hypocrisie sous toutes leurs formes. Comte cependant, bien qu'il considère avec Kant tout acte exclusivement égoïste, toute bonne action accomplie en vue d'une récompense, comme entachés d'immoralité, ne partage pas sa réprobation exagérée de tout acte moral, produit d'un penchant, d'un désir. — Enfin, tous deux eurent une véritable vocation philosophique. Comte ne se laissa jamais écarter de la sienne, malgré les épreuves d'une



vie pleine de privations, malgré d'incessantes inimitiés et de nombreuses persécutions. Sa contention d'esprit était presque surhumaine; constamment absorbé en lui-même, s'il dédaignait les choses mesquines et de détail, il avait le plus noble enthousiasme pour toutes les idées générales et élevées. En lui nous voyons le philosophe comme le type le plus accompli de l'Humanité, comme l'ami le plus sincère du peuple. »

On ne saurait mieux dire, et ce jugement fait le plus grand honneur à M. Hermann Lietz. Son parallèle soulève néanmoins une critique : il insiste trop exclusivement sur les ressemblances des deux penseurs et insuffisamment sur les dissemblances de leurs doctrines philosophiques. Entre les criticisme et le Positivisme il existe un abîme. Kant est certes le philosophe qui a porté les coups les plus rudes à la métaphysique; mais sur les ruines qu'il avait ainsi faites, il s'est trouvé inapte à construire un nouvel édifice sur de nouveaux fondements; il s'est donc servi des anciens qui, à certains, ont paru d'autant plus solides qu'ils avaient été profondément ébranlés. Comte, au contraire, fortement imbu de l'impuissance au point de vue intellectuel et de l'inutilité au point de vue social de la métaphysique, que Voltaire appelait avec raison « le roman de l'esprit », ne perdit même pas son temps à la démolir; les sciences qui constituent sa philosophie s'en chargeaient mieux que ne pouvait le faire la logique la plus serrée. Le criticisme n'est, en réalité, qu'une métaphysique basée sur une psychologie; le Positivisme, lui, est une conception scientifique du monde et de l'homme individuel et social, c'est, selon la brève et excellente formule d'un disciple de Comte, « l'étude scientifique du monde intellectuel et moral (1) ». Ce qui distingue encore Comte de Kant, c'est qu'il est le fondateur de la sociologie, de la nécessité de laquelle le philosophe allemand a eu en quelque sorte l'intuition dans un opuscule célèbre, mais dont le mérite de la création revient tout entier au penseur français.

Kant n'en doit pas moins être considéré comme un des grands génies philosophiques de l'Humanité, et Comte, avec raison, lui a donné une place distinguée dans son Calendrier; il le considérerait même comme un de ses principaux prédécesseurs et incorpora au Positivisme une des conceptions principales de son système : la distinction du *moi* et du *non-moi*, les relations du *phénomène* et du *noûmène*.

(1) C. de Blignières, *La Doctrine positive. Projet de Revue*. Broch. in-8°, p. 16, Paris, 1867.

M. J.-H. Bridges, dans son article sur Kant du *Nouveau Calendrier des Grands Hommes* (1), a très remarquablement résumé, en une page excellente que nous croyons devoir reproduire, les motifs pour lesquels le philosophe de Königsberg méritait l'honneur que lui a décerné Comte.

« Kant accepta complètement, dit notre confrère anglais, les conclusions de Hume au sujet de la relativité de nos connaissances. Il fut d'accord que nos perceptions du monde extérieur étaient réductibles à des impressions mentales et à des idées. Hume maintenait qu'en dessous de ces impressions mentales et de ces idées il n'existait aucun fait qui pût être établi avec certitude. Kant, cependant, chercha à analyser et à expliquer le fait de la connaissance.....

« .... Nous n'essaierons pas de décrire ici le système philosophique de Kant. Le principe important qui s'en dégage est la conception de la connaissance comme résultant de l'action mutuelle de deux facteurs, l'un fourni par le mode extérieur, l'autre par la structure de l'esprit humain. Ainsi, le principe fondamental de Kant est un exemple spécial du fait essentiel indiqué par Comte, et éclairé ensuite, avec l'ampleur que l'on sait, par Spencer, qui constitue la vie : l'action et la réaction tendant toujours à l'accommodement entre l'organisme et le milieu.

« Kant tient que nous ne pouvons avoir une connaissance quelconque de l'existence des choses « en elles-mêmes ». Il attaque avec une logique impitoyable toutes les tentatives faites pour démontrer ou réfuter l'existence d'un être suprême. Toutefois son sentiment éthique si caractérisé le conduit, dans sa *Critique de la raison pratique*, à maintenir instinctivement la croyance en Dieu et à l'immortalité comme base de la vertu ; ce qui ne doit pas nous surprendre en l'absence de la synthèse humaine, dont la constitution n'a eu lieu qu'après sa mort (2).

(1) Traduction française, par Avezac-Lavigne. T. II, p. 356, Paris, Ernest Leroux, 1894.

(2) Comte parle quelque part de l'« affectation universelle de sensibilité » qui se développa au début de ce siècle. « De là résulta, ajoutait-il, chez les âmes honnêtes, une hypocrisie analogue à celle de Kant, qui, malgré ses démonstrations décisives contre la réalité des croyances surnaturelles, s'efforçait sincèrement de les rétablir au nom de leur nécessité sociale. Quelques dangers, intellectuels et moraux qu'offrit une telle disposition, surtout parmi les natures vulgaires, rétrogrades ou révolutionnaires, il faut aujourd'hui reconnaître qu'elle concourut à poser provisoirement le problème occidental. » *Système de pol. posit.*, tome III, p. 606.

« Son ouvrage sur l'*Histoire universelle* doit prendre place, avec les ouvrages semblables de Turgot et de Condorcet, parmi ceux qui ont préparé la sociologie de Comte. Il commence par établir largement que les actions humaines, de même que les autres phénomènes naturels, ont lieu suivant des lois générales. Il continue en expliquant, avec une extrême précision, que le jeu des passions sociales tend, à l'insu des générations, vers un état final, dans lequel les penchants égoïstes des individus et les tendances ambitieuses des nations se subordonnent, sans sacrifice, à l'harmonie sociale. Pour parvenir à cet état final, l'égoïsme est aussi nécessaire que l'altruisme. La lutte pour augmenter le bien-être personnel a poussé les forces humaines à la création de nouvelles conceptions du bien, qui, une fois surgies, ont lié ensemble volontairement les hommes et ont diminué la nécessité de l'union par contrainte. »

Après ce long détour, revenons à la thèse de M. Lietz. Elle se divise en deux parties : l'une d'exposition, l'autre de critique.

De la première il n'y a que des éloges à faire. L'auteur, qui ne semble connaître que le *Cours de Philosophie positive*, l'a étudié à fond ; il suit, pour ainsi dire, pas à pas les trois derniers volumes de cette grande œuvre pour en extraire les éléments de son sujet. Après un coup d'œil rapide sur la loi des trois états, il expose les critiques, si fondées, faites par Comte sur l'état actuel de la société et qui lui servent à démontrer la nécessité et l'opportunité de la création d'une science sociale, la *physique sociale*, comme Comte s'exprimait avant d'avoir créé le mot *sociologie* ; il énumère ensuite les voies et moyens proposés par le philosophe pour la réorganisation de cette société, de la maladie de laquelle on ne peut douter lorsqu'on voit son anarchie intellectuelle et morale, son manque d'idées générales, etc., remèdes qui ne sauraient être empruntés aux philosophies théologiques et métaphysiques dont la puissance organisatrice est épuisée, mais à la philosophie positive qui, seule, étudie, à l'aide de la méthode scientifique, tous les phénomènes physiques, sociaux et moraux, subordonne l'ordre matériel à l'ordre spirituel et, par suite, la politique à la morale, l'égoïsme à l'altruisme, établit enfin un classement, une hiérarchie positive des forces sociales, au sommet de laquelle devra être placée la classe spéculative, véritable puissance spirituelle, à laquelle il appartiendra de faire prédominer l'esprit d'ensemble sur la tendance à la spécialité dispersive, caractéristique de notre époque. On voit, par ce rapide résumé, que M. Lietz a su extraire du sixième volume de la *Philosophie positive* les idées mères que le grand penseur a développées dans ses publications ultérieures.

Les trois premiers chapitres, qui sont loin d'être des hors-d'œuvre, sont suivis d'un quatrième où se trouve exposé le véritable sujet de la thèse, c'est-à-dire l'analyse de l'idée de société, de ses éléments constitutifs et de son but.

Dans le système de Comte, l'idée de société a une signification et une importance très grandes, on peut dire capitales; elle doit être considérée comme « le nœud fondamental de la philosophie positive ». C'est pourquoi, « il importe de dissiper directement, « chez tous les bons esprits, la dernière source essentielle des « illusions métaphysiques, en faisant spécialement ressortir la véritable nature du point de vue humain, qui, de toute nécessité, « doit être éminemment social, et pas seulement individuel : car, « sous le rapport statique aussi bien que sous l'aspect dynamique, « l'homme proprement dit n'est, au fond, qu'une pure abstraction; « il n'y a de réel que l'Humanité, surtout dans l'ordre intellectuel « et moral » (*Cours de Philosophie positive*, 2<sup>e</sup> édition, t. VI, p. 590). Ce passage suffit, et M. Lietz ne pouvait mieux choisir, pour démontrer la suprématie du point de vue social dans l'ensemble du système de Comte.

La société est un organisme, un tout, soumis à des lois, de même que l'organisme individuel; elle ne saurait exister sans une harmonie, une solidarité entre tous ses membres. Cette solidarité, mieux appelée le sentiment social inhérent à l'homme, Comte l'a remarquablement définie : « Cette admirable spontanéité qui nous « fait irrésistiblement compatir aux douleurs quelconques de « tous les êtres sensibles, et surtout de nos semblables, aussi bien « que participer involontairement à leurs joies, au point d'oublier « quelquefois, en leur faveur, le soin continu de notre propre « conservation » (*Loc. cit.*, t. IV, p. 392).

Notre auteur expose ensuite, dans des paragraphes successifs, les bases intellectuelles et morales indispensables à l'existence de la société, l'esprit de subordination, de discipline, de confiance, la foi positive, enfin, tous les éléments nécessaires à la constitution de l'organisme social et sans lesquels il ne formerait qu'un agrégat amorphe et inconsistent.

Cette première partie où l'auteur, par le nombre et le choix de ses citations, fait preuve d'une connaissance approfondie du *Cours de Philosophie positive*, se résume, en quelque sorte, dans la définition suivante que nous traduisons textuellement :

« La société, d'après Comte, est la réunion des humains, apte, par sa nature fondamentale, à une évolution continue et progressive, basée sur le principe de la libre subordination de ses membres étroitement unis par les liens de la solidarité et de la confiance,

et en une même conception générale du monde intellectuel et moral, enfin réglée par une discipline et une organisation conformes à la raison. »

Avec la seconde partie on entre dans le jugement, dans la critique; mais, là, il est difficile de suivre l'auteur si l'on ne définit pas les termes. Comme il s'agit pour lui de démontrer que Comte est un *idéaliste*, il s'agit pour nous de savoir ce qu'il faut entendre par là.

En Allemagne, on applique cette étiquette à plusieurs doctrines ou systèmes philosophiques, encore en honneur aujourd'hui dans les Universités. Il y a d'abord l'idéalisme subjectif de Kant, où l'on considère que la connaissance de l'essence et de la raison dernière des choses n'est possible que par les idées. Il y a ensuite le système de l'idéalisme absolu que Fichte tira du criticisme de Kant, en considérant toutes les réalités comme les créations du moi. Enfin, on peut encore citer l'idéalisme de Hegel qui admet l'identité du sujet et de l'objet.

Dans laquelle de ces écoles M. Lietz veut-il faire entrer Auguste Comte? Si nous l'avons bien compris, c'est peut-être bien dans celle de Fichte, du moins, en ce qui concerne ses conceptions sociologiques et morales, où il trouve plus d'*idéalisme* que d'*empirisme*. Il entend par là que, si les sciences physiques sont étudiées par Comte à l'aide de la méthode expérimentale, sa sociologie et sa morale sont plutôt des créations de son esprit. Il me semble qu'il y a là une erreur profonde, une confusion complète, dans la manière d'envisager le travail intellectuel selon la *méthode positive*.

Le grand principe de cette méthode, c'est la subordination du raisonnement à l'observation; quoique l'un n'aille jamais sans l'autre, il est incontestable que le dernier mot, comme le premier, doit toujours appartenir à l'observation. Elle seule nous permet de contrôler les inductions tirées des faits et les hypothèses que ceux-ci nous suggèrent.

L'observation et le raisonnement se suivent donc, se combinent, mais à des doses inégales. Ils s'aident mutuellement et ne peuvent se passer l'un de l'autre. En effet, supprimez le raisonnement, ou bien ne lui faites qu'une trop petite part, il ne restera plus qu'un *grossier empirisme*; mais, d'un autre côté, lâchez la bride au raisonnement, à l'argumentation, et vous tomberez dans un *mysticisme stérile*, ou dans l'*idéalisme*.

Pour employer le langage de la physiologie, les sens externe fournissent au cerveau les matériaux nécessaires à son fonction-

nement normal; « mais ces matériaux recueillis par la sensation sont, pour ainsi dire, jetés pêle-mêle dans le cerveau, il s'agit de les ordonner, de les classer, avant de les livrer au travail de la digestion mentale (1). » Recevoir les impressions extérieures, puis les élaborer, telles sont donc les fonctions essentielles des cellules cérébrales, et particulièrement des cellules corticales. Que ces cellules reçoivent passivement les sensations, ne cherchent pas à savoir ce qu'elles contiennent, c'est de l'empirisme; qu'elles travaillent, au contraire, à vide, sans tenir compte des matériaux fournis par l'extérieur, elles arrivent à produire des combinaisons fictives, souvent incohérentes, rarement en rapport avec la réalité : ce sont là les « créations du moi » de l'idéalisme.

Aucun de ces deux modes de travail cérébral ne saurait caractériser l'activité mentale de Comte. S'il est un philosophe de ce siècle dont l'œuvre soit une protestation constante contre l'empirisme, c'est bien lui. Dès les premières pages de son *Cours de Philosophie positive* il enseigne la nécessité, dans l'étude des phénomènes naturels, « d'une théorie quelconque pour lier les faits », et il démontre que, dans l'état positif, l'esprit humain s'attache « uniquement à découvrir, par l'usage bien combiné du raisonnement et de l'observation, leurs lois effectives, c'est-à-dire leurs relations invariables de succession et de similitude ».

Mais, s'il est impossible de lui faire le reproche d'empirisme, peut-on, du moins, l'enrôler sous la bannière de l'idéalisme? Les théories sociologiques et morales ne dépassent-elles pas l'observation des faits? Ne sont-elles pas, selon l'expression de M. Lietz, *hyperempiriques*? En d'autres termes, ne sont-elles pas des créations de son propre esprit, nullement basées sur la réalité? Il nous semble qu'il est facile de répondre à cette objection.

Comte, à la suite de quelques grands esprits, a très bien compris que le grand progrès à accomplir, ce serait d'étudier les phénomènes sociaux et moraux à l'aide de la méthode scientifique, c'est-à-dire d'étudier les faits et d'en chercher les lois. Ce que Turgot, Condorcet, Kant, d'autres encore, avaient tenté d'une façon en quelque sorte implicite, il le réalisa en créant la sociologie. De la masse de faits sociaux que son érudition avait emmagasinés dans son vaste cerveau, à la suite d'un travail d'abstraction dont peu d'hommes ont été capables « depuis trois mille ans qu'il en existe et qui pensent », Comte sut tirer des lois de succession et de

(1) Pierre Laffitte, *Cours de philosophie première*. Paris, 1889, tome I, p. 240.

similitude. Aucune de ces lois, dont il a démontré l'existence à maintes reprises dans ses différents ouvrages, n'a encore été reconnue fausse, malgré les critiques nombreuses dont elles ont été l'objet.

Ce qu'il a fait, et bien fait, pour les phénomènes sociaux, il est possible, comme il l'a prouvé, de le faire pour les phénomènes moraux, qui, eux aussi, malgré leur grande complexité, sont soumis à des lois plus difficiles sans doute à découvrir que les lois physiques.

Il est impossible de voir quelles relations peuvent exister entre ces deux constructions, la sociologie et la morale positives, édifiées à l'aide de toutes les méthodes scientifiques, et les « créations du moi » des idéalistes pour qui le monde extérieur n'existe pas puisqu'ils le considèrent comme une représentation, j'allais dire une sécrétion, de leurs cellules cérébrales. Auguste Comte ne dérive donc ni de Fichte, ni de Hegel, ni d'aucune des nombreuses écoles d'idéalisme transcendantal qui florissaient en Allemagne dans la première partie de ce siècle.

Mais il n'est pas sans intérêt de montrer à l'aide de quels faits et arguments M. de Lietz essaie de convaincre d'idéalisme le fondateur de la philosophie positive. Ils ne paraissent pas très probants. Parmi ce qu'il appelle les « facteurs idéalistes et hyper-empiriques » du Positivisme, il place, en premier lieu, ce que Comte a appelé la *foi positive*. « La philosophie positive est-elle science ou foi ? » A cette question, notre auteur a trouvé la meilleure réponse dans le passage suivant du tome VI (p. 475) du *Cours de philosophie positive* : « La *foi théologique* toujours liée « à une révélation quelconque, à laquelle le croyant ne saurait « participer, est assurément d'une toute autre espèce que la *foi positive*, toujours subordonnée à une véritable démonstration, dont « l'examen est permis à chacun sous des conditions, déterminées, « quoique l'une et l'autre résultent également de cette universelle « aptitude à la confiance, sans laquelle aucune société réelle ne « saurait jamais subsister. » Le Positivisme est donc, en même temps, et science et foi, mais foi démontrable. Avoir donné à un terme théologique une acception positive, est-ce faire œuvre d'idéaliste ? On nous permettra d'en douter. Mais où notre auteur dépasse la mesure, c'est quand il cherche à établir que la conception morale du monde, la conception même de la Philosophie de Comte, ne sont pas conséquentes aux principes qu'il a posés au début de son œuvre, qu'elles sont entachées d'idéalisme. C'est le cas de dire : qui veut trop prouver ne prouve rien.

M. Lietz, après s'être battu les flancs, — qu'on nous passe cette expression — pour convaincre Comte d'idéalisme, devait naturellement finir par trouver très idéaliste la définition de la société qu'il donne d'après le grand philosophe français. Il en trouve les éléments absolument « hyperempiriques », c'est-à-dire ne ressortant pas de l'observation des faits. La société, dans le sens que lui donne Comte, c'est-à-dire avec la solidarité intellectuelle et morale, la confiance, la subordination volontaire entre ses membres, — « cette société, dit notre auteur, n'existe pas aujourd'hui, et n'a jamais existé ; nous ne voulons pas ajouter qu'elle n'existera jamais, parce qu'une telle assertion nous paraît être trop pessimiste. » Il se trompe : sans ces caractères, peut-on ajouter, la société n'aurait jamais existé ; c'est grâce au développement de ces éléments constitutifs que la vie sociale a pu progresser et qu'elle progressera encore. Et ceci n'est pas une vue de l'esprit, un concept idéaliste, c'est un fait d'observation. Que M. Lietz relise l'histoire, depuis l'époque de l'âge de pierre jusqu'au dix-neuvième siècle, et s'il est doué d'abstraction scientifique — nous ne disons pas d'abstraction métaphysique — il conclura avec Comte que les *phénomènes historiques* sont soumis à des lois, au même titre que les *phénomènes physiques*, et que la définition de la société qui s'en dégage n'a rien de mystique ou d'« hyperempirique », selon son expression.

« Toute la suite des hommes, pendant le cours de tant de siècles, doit être considérée, a dit Pascal, comme un même homme qui subsiste toujours et apprend continuellement. » Voilà un exemple célèbre d'abstraction en sociologie, qui justifie Comte, s'il en est besoin, d'avoir comparé la société à un organisme et d'avoir conçu la grande abstraction de l'Humanité. Ces abstractions sont aussi légitimes que celles qui ont été instituées dans les sciences inférieures, et elles ont le même caractère positif.

Il n'y a, en effet, rien d'idéaliste dans la conception de la société comme un organisme. Mais est-il exact, comme le pense M. Lietz à la suite de Kant, que tout organisme, qu'il soit du monde animal ou végétal, porte en lui l'idée de finalité, et qu'il doit en être de même de l'organisme social ? Si notre auteur, au lieu d'en croire Kant, qui n'était pas biologiste, s'était enquis auprès des physiologistes, il aurait appris que la théorie des causes finales était exclue de leurs recherches, comme elle l'est de toutes les sciences. S'il relisait à ce point de vue les leçons du *Cours de philosophie positive* concernant la biologie, il verrait qu'à cette vieille théorie métaphysique s'est substitué le principe positif des conditions



d'existence, que ce principe vivifiant a transformé les sciences biologiques et leur a permis de faire les progrès immenses dont s'enorgueillit notre siècle. C'est ce principe, comme l'a rappelé récemment notre savant ami, le Dr C. Hillemand (1), que Claude Bernard a si longuement développé dans un ouvrage célèbre, sous le nom de *déterminisme*.

Ce même principe s'applique avec raison à l'organisme social, et l'illustre fondateur du Positivisme nous enseigne dans sa statique sociale les conditions d'existence de toute société, et dans sa dynamique les lois de son développement. Il n'y a place nulle part pour des causes premières ou pour des causes finales ; l'idée d'évolution suppose le passage d'une forme sociale à un autre sous des conditions spéciales qu'il s'agit de déterminer ; s'il est possible de prévoir, jusqu'à un certain point, quelle sera cette forme ultérieure, c'est grâce à l'étude des antécédents. Savoir, c'est prévoir, a dit Comte ; et la prévision, quoique plus difficile en sociologie par suite de la très grande complexité des phénomènes étudiés, n'y est cependant pas impossible.

Un dernier point à relever, sur lequel nous sommes en désaccord avec M. Lietz. Il se demande comment Comte, qui « jette un regard si sévère, si critique et même souvent si pessimiste sur les imperfections du passé, manifeste un si excessif optimisme en ce qui concerne l'avenir ». On pourrait répondre que c'est parce que Comte, en vrai disciple du XVIII<sup>e</sup> siècle, croyait au progrès, non pas au progrès infini, ce qui serait une idée métaphysique. Mais cet optimisme est-il vraiment aussi excessif que veut bien le dire M. Lietz ? Les passages suivants, empruntés au *Système de politique positive* qu'il semble ne pas connaître, seront les meilleures réponses à cette question.

« L'accusation d'optimisme est encore moins fondée que la précédente (celle de fatalisme), écrit Comte dans le *Discours sur l'ensemble du Positivisme*, publié en 1848 (V. *Pol. posit.* t. I, p. 55) ; car cette tendance n'offre point, comme l'autre, une certaine solidarité initiale avec l'esprit positif. Sa source est, au contraire, purement théologique ; son influence décroît toujours à mesure que la positivité se développe. Quoique les phénomènes immodifiables du ciel nous suggèrent naturellement l'idée de perfection autant que celle de nécessité, leur simplicité y manifeste tellement les vices de l'ordre réel que jamais l'optimisme n'y aurait cherché ses principaux arguments, si la première ébauche de

(1) *Revue Occidentale*, n° de septembre 1896, p. 187.

leurs théories n'avait pas dû s'accomplir sous le régime monothéique, qui nécessairement y faisait supposer une sagesse absolue. D'après la théorie d'évolution sur laquelle repose aujourd'hui le Positivisme systématique, la philosophie nouvelle s'oppose spontanément de plus en plus à l'optimisme, comme au fatalisme, à mesure qu'elle embrasse des spéculations plus compliquées, où les imperfections de l'économie naturelle se prononcent davantage, comme ses modifications. C'est donc envers les études sociales que cette imputation, ainsi que l'autre, doit être le moins méritée. Si elle y semble encore motivée, cela n'y tient aujourd'hui qu'à une insuffisante introduction du véritable esprit scientifique, par des penseurs qui n'en pouvaient assez connaître la nature et les conditions. Faute d'une convenable préparation logique, on a, de nos jours, souvent abusé, en effet, d'un caractère propre aux phénomènes sociaux pour y représenter comme absolue une sagesse spontanée qui est seulement supérieure à ce que comportait leur degré de complication. En tant que dus à des êtres intelligents, qui tendent toujours à corriger les imperfections de leur économie collective, ces phénomènes doivent offrir un ordre moins imparfait que si, avec une égale complication, leurs agents pouvaient être aveugles. La vraie notion du bien s'y rapportant toujours à l'état social correspondant, il est impossible que chaque situation et chaque changement quelconques n'y soient pas, à certains égards, justifiables, sans quoi ils deviendraient aussitôt inexplicables, comme contraires à la nature des êtres et à celle des événements. Tels sont les motifs naturels qui maintiennent aujourd'hui une dangereuse tendance à l'optimisme politique chez les penseurs, même éminents, qu'une sévère éducation scientifique n'a point préparés à s'affranchir assez des habitudes théologico-métaphysiques envers les plus hautes spéculations. Dans l'harmonie spontanée de chaque régime avec la civilisation correspondante, leur vague appréciation suppose une perfection chimérique. Mais il serait injuste d'attribuer au Positivisme des aberrations évidemment contraires à son véritable esprit, et dues seulement à l'insuffisante préparation logique et scientifique de ceux qui ont jusqu'ici abordé les contemplations sociales. L'obligation de tout expliquer ne conduit à tout justifier que ceux qui ne savent point, en sociologie, distinguer l'influence des personnes de celle des situations. »

L'optimisme et le pessimisme, tels qu'on les conçoit généralement, sont donc des notions absolues, relevant de la théologie ou de la métaphysique, et qui, si elles passaient du domaine de l'idée

pure à la pratique, seraient destructrices de toute action. Aussi Comte s'est appliqué à leur donner une acception positive, ainsi que le prouve le passage que nous venons de citer et comme le démontre le suivant :

« Sans que l'ordre réel nous soit aussi favorable que le rêve l'optimisme monothéique, l'existence et le progrès de l'Humanité prouvent qu'il ne nous est pas radicalement hostile, et même qu'il nous devient de plus en plus propice, surtout d'après notre sage intervention. Puisque nous devons principalement étudier ses bonnes dispositions, afin de les mieux développer, il importe que notre propre tendance nous prépare à les discerner. L'admiration préalable, reconnue indispensable à l'appréciation du beau, ne convient pas moins à l'étude du vrai comme à l'élaboration du bon. » (*Loc. cit. t. III, p. 95.*)

La part à faire à l'optimisme et au pessimisme, deux tendances de l'esprit pour la défense desquelles on a versé des flots d'encre, est admirablement indiquée par Comte dans cette formule : « Se résigner noblement à tous les maux insurmontables, et intervenir, avec une sage énergie, dans tous les cas modifiables : tel est le caractère pratique de l'existence positiviste, individuelle ou collective. »

On voit que les critiques de M. Lietz sont nombreuses; nous pourrions encore en relever d'autres dans son travail, mais il faut savoir se borner. Nous croyons en avoir assez dit pour prouver que si sa thèse est intéressante, si elle rend justice à la haute valeur intellectuelle, sociale et morale du Positivisme, elle est inspirée par une idée erronée et par une conception insuffisante de ce qu'est une science. Ce dernier fait trouve sans doute son explication dans l'éducation exclusivement philosophique — ou, si l'on préfère, métaphysique — du candidat. Quant à l'idée erronée, c'est de vouloir, à l'aide de certains membres de phrase tirés des œuvres de Comte, faire du fondateur du Positivisme un philosophe idéaliste. Au beau temps de la scolastique on pouvait disputer de tout à l'aide d'arguments plus ou moins démonstratifs; les facultés de philosophie des Universités allemandes en seraient-elles encore là? Nous le regretterions. Nous préférons donner une explication plus simple et voir l'influence du milieu intellectuel ambiant dans cette transfiguration de Comte et de sa doctrine.

Quoi qu'il en soit, le travail de M. Lietz, nous aimons à le répéter, est d'une lecture attachante; il fait penser. Les critiques mêmes que nous lui avons adressées prouvent en quelle estime nous le tenons. Nous souhaitons de tout cœur qu'il trouve beau-

coup de lecteurs en Allemagne. Nous ne doutons pas que quelques-uns d'entre eux, remontant à la source, voudront étudier, comme M. Lietz, mais avec moins d'idées préconçues, l'œuvre de notre grand philosophe français.

D<sup>r</sup> ANT. RITTI.

## II

**Versuch einer concreten Logik. Classification und Organisation der Vissenschaften (Essai d'une Logique concrète. Classification et Organisation des Sciences)**, von Dr Thomas-G. Masaryk, professor and der böhmischen Universität in Prag. 1 vol. in-8°, Vienne, Carl Konegen, 1887.

Notre excellent confrère et ami, le D<sup>r</sup> C. Hillemand, publiait dans le dernier numéro de cette *Revue* un article très intéressant et des plus suggestifs sur « Auguste Comte et l'évolution moderne en philosophie, en science, en art, en politique », dans lequel il démontre, avec preuves à l'appui, que l'esprit du Positivisme souffle partout, en Europe comme en Amérique et même dans l'Extrême-Orient, sur les intelligences et les cœurs que les religions et les philosophies anciennes sont impuissantes à satisfaire. Il donne une liste très fournie, — qu'on pourrait allonger encore, — de savants et d'hommes politiques, de littérateurs et d'artistes, de philosophes et même de professeurs de philosophie, qui se sont inspirés de l'œuvre de Comte, qui ont puisé dans ce vaste réservoir d'idées. C'est à croire que le fameux diocèse de la libre pensée, si spirituellement dénommé ainsi par Sainte-Beuve, devient de plus en plus le grand diocèse du Positivisme.

Parmi les noms cités par M. C. Hillemand, nous trouvons celui de M. Masaryk. Professeur à l'Université tchèque de Prague, M. Masaryk, entre autres travaux philosophiques, a publié sur la classification et l'organisation des sciences un ouvrage qu'il intitule : *Essai d'une logique concrète*. Ce volume, quoique datant déjà de dix ans, mérite d'être signalé à l'attention du public positiviste : les questions qui y sont traitées sont toujours actuelles ; suivant qu'elles sont résolues dans un sens ou dans un autre, elles peuvent confirmer ou infirmer la doctrine de Comte. Il s'agit, en effet, de la hiérarchie des sciences, cette clef de voûte du système, à laquelle on ne saurait toucher sans ébranler l'édifice.

Tel n'est point le sentiment de M. Masaryk, car son œuvre a

justement pour but de démontrer que la classification des sciences de Comte n'est pas parfaite, qu'elle a besoin d'être remaniée, modifiée et complétée. Mais, convaincu sans doute, selon la célèbre formule, qu'on ne détruit que ce qu'on remplace, il nous propose un nouveau classement des sciences dont il augmente en même temps le nombre.

Selon lui, toutes nos connaissances sont théoriques ou pratiques ; les premières à leur tour peuvent être abstraites ou concrètes. De là trois groupes contenant chacune sept sciences. Laissons de côté les deux groupes de sciences théoriques concrètes et de sciences pratiques et ne retenons que celui des sciences abstraites qui, dans l'esprit de l'auteur, correspond à la hiérarchie scientifique de Comte. Comme les autres, il contient sept sciences : 1° l'arithmétique ; 2° la mécanique : physique et chimie ; 3° la biologie ; 4° la psychologie, la sociologie ; 5° l'étude du langage ; 6° l'esthétique ; 7° la logique abstraite.

De ces sept sciences, les quatre premières sont des sciences hiérarchiques ; les trois dernières sont en dehors de la hiérarchie. Pourquoi ? Parce que l'objet de leur étude doit trouver place à côté de la psychologie et de la sociologie. Cela ne sera pour aucun positiviste une raison bien convaincante. Certes, ils ne font pas fi de la linguistique qui contribue pour sa part à édifier la théorie de langage, ni des recherches esthétiques qui aident à nous faire comprendre l'évolution du beau dans la société ; mais tout ce que ces deux sciences peuvent nous apprendre n'acquiert sa véritable valeur que si on le place non sur les confins de la sociologie, mais dans la sociologie même. L'art et le langage sont des produits de l'Humanité ; la science de l'Humanité doit donc les absorber et en fournir la théorie positive. C'est la tâche que Comte a magistralement remplie dans son *Système de politique positive*.

Quant à la *logique abstraite*, « cette science qui, d'après notre auteur, nous enseigne les règles suivant lesquelles notre esprit est mis en activité dans le travail scientifique, » en quoi diffère-t-elle de la logique concrète ou science des méthodes ? D'abord nous ne voyons pas comment on étudierait celles-ci avec profit, en les séparant des sciences où elles sont mises en œuvre. A la logique abstraite, il ne reste donc plus que les procédés de raisonnement, les syllogismes, etc., toutes ces règles et formules, souvent vides de sens, qui passionnaient les écoles du moyen âge et n'ont plus aujourd'hui qu'un intérêt historique. Comte s'exprime sur ce point avec sa vigueur habituelle, en un passage de

son *Catéchisme* (2<sup>e</sup> édit., Paris, 1874, p. 176), que nous croyons devoir reproduire :

« Une heureuse ignorance dispense aujourd'hui votre sexe, dit-il à sa catéchiste, des démonstrations philosophiques par lesquelles le Positivisme s'efforce de convaincre les hommes que l'on ne peut apprendre à raisonner qu'en raisonnant, avec certitude et précision, sur des cas nettement appréciables. Ceux qui sentent le mieux que tout art doit s'apprendre par le seul exercice écoutent encore les sophistes qui leur enseignent à raisonner, ou même à parler, en ne raisonnant ou parlant que sur le raisonnement ou la parole. Mais, quoiqu'on vous ait appris la grammaire, et peut-être la rhétorique, on vous a du moins épargné la logique, la plus ambitieuse des trois études scolastiques. Dès lors, votre propre raison, heureusement cultivée sous votre cher Molière, a bientôt apprécié les deux autres puérilités classiques. Fortifiée maintenant par des convictions systématiques, vous n'hésitez point à railler convenablement les Trissotins qui voudraient nous enseigner l'art déductif, sans en avoir fait eux-mêmes le moindre usage mathématique. Chaque partie essentielle de la méthode positive devra toujours s'étudier dans la doctrine scientifique qui la fit d'abord surgir. »

Après avoir ainsi retranché de la classification des sciences abstraites de M. Masaryk ces trois sciences non hiérarchiques, il reste quatre sciences ou même sept, si nous décomposons le groupe ternaire de la mécanique et le groupe binaire de la psychologie, comme l'auteur le fait lui-même dans son étude de leur organisation respective. On a alors la hiérarchie suivante : 1<sup>o</sup> la mathématique, dont il sépare la géométrie, qui ne serait qu'une science concrète ; 2<sup>o</sup> la mécanique, qui a pour science concrète l'astronomie ; 3<sup>o</sup> la physique ; 4<sup>o</sup> la chimie ; 5<sup>o</sup> la psychologie ; 6<sup>o</sup> la sociologie. La morale ou éthique et la politique constituent deux sciences pratiques dérivant de la sociologie.

Cette hiérarchie scientifique, qui s'est inspirée de celle de Comte, mais qui s'inspire davantage encore des critiques portées à cette dernière par J. Stuart Mill et Herbert Spencer, ne repose sur aucun principe général fortement établi. Les modifications qu'elle a la prétention d'apporter à l'œuvre si philosophique du fondateur du Positivisme ne sont pas heureuses. Pourquoi, par exemple, cette dislocation de la mathématique, cette science, une par excellence, dont les trois parties (calcul ou analyse, géométrie et mécanique) se subordonnent rationnellement ? Pourquoi en exclure l'astronomie qu'il est cependant

impossible d'isoler de la science précédente, et pour les besoins de laquelle ont été construites les plus importantes théories mathématiques?

En ce qui concerne la psychologie, le débat semble définitivement clos, sur la question de savoir si elle constitue une science distincte, ou bien si elle n'est qu'une dépendance de la biologie. C'est cette dernière opinion, soutenue par Comte, Broussais et la majorité des physiologistes, qui a prévalu; c'est celle qui s'impose de plus en plus et malgré eux aux psychologues de profession, puisqu'ils ne peuvent plus enseigner aujourd'hui leur prétendue science sans se servir des résultats de la physiologie du système nerveux ou de la pathologie mentale. Le seul argument qu'ils emploient pour soutenir leur thèse (la distinction de la psychologie de la physiologie), c'est le phénomène de conscience. « La conscience, dit M. Masaryk, est un phénomène *sui generis*, qui nous affirme notre propre existence. Descartes : *Cogito, ergo sum*. La psychologie est surtout la science de la conscience. » Mais cette conscience, demanderons-nous à l'auteur, n'est-elle pas un phénomène physiologique, au même titre que la respiration ou la circulation? Ne se modifie-t-elle pas avec les changements produits dans l'organisme soit par l'âge, soit par la maladie? Nous ne voyons donc là aucune raison suffisante pour constituer une science distincte de ce phénomène de conscience, pas plus que nous ne proposerions de former une science à part, située entre la chimie et la biologie, des fonctions de la digestion, sous prétexte qu'il s'y produit des combinaisons chimiques. Tout esprit vraiment scientifique admet aujourd'hui que les phénomènes intellectuels et moraux sont fonctions du cerveau; qu'il existe entre cet appareil si compliqué et le reste de l'organisme des relations constantes, si bien étudiées par Cabanis dans son œuvre capitale. Qu'est-ce tout cela, si ce n'est de la physiologie?

Je vois bien qu'outre cette action constante de l'organisme sur le cerveau et du cerveau sur l'organisme, il en existe une autre, celle de la société sur notre fonctionnement intellectuel et moral. Il y a là une étude très complexe, très délicate, que Comte a nettement séparée de la biologie et dont il a fait la base de la morale. La « théorie positive de la nature humaine », comme il l'appelle, tire ses éléments de la biologie et de la sociologie, et au lieu de servir d'intermédiaire entre ces deux sciences, en constitue au contraire le couronnement (1).

(1) Voir pour le développement de cette importante question : Comte,

Si nous nous séparons complètement de M. Masaryk sur sa manière d'envisager la hiérarchie des sciences, et si nous l'en critiquons, nous nous plaisons à reconnaître que, dans la partie de son œuvre consacrée à l'organisation des sciences, il y a beaucoup à louer ; mais, là aussi, nous exprimerons le regret qu'ayant pris le *Cours de philosophie positive* pour guide, il ne l'ait pas plus fidèlement suivi. Ainsi, dans le chapitre qu'il consacre à la biologie, M. Masaryk ne semble pas se rendre compte de l'extrême importance de la méthode pathologique pour la détermination des lois biologiques. En effet, dans sa note de la page 110, il dit : « La pathologie est d'après Comte le complément de l'histoire naturelle concrète. » Ce qui est vrai et peut se lire à la page 328 du tome III du *Cours de philosophie positive* (2<sup>e</sup> édit., Paris, 1864) ; mais cent pages plus haut (p. 230), Comte parle de « la haute destination scientifique de l'exploration pathologique, envisagée comme offrant, pour la biologie, d'une manière bien plus satisfaisante, le véritable équivalent général de l'expérimentation proprement dite », et il consacre les huit pages suivantes aux principes fondamentaux de cette méthode, dont l'importance n'est mise en doute par aucun biologiste, qu'il s'agisse de l'étude des fonctions les plus simples ou de celle des plus compliquées. Par ces dernières, nous entendons les fonctions intellectuelles et morales, à la détermination desquelles on ne peut arriver, comme l'enseigne Comte, qu'en appliquant « tous les divers moyens généraux d'exploration qui conviennent aux recherches physiologiques », et, en particulier, « l'analyse pathologique » (*Loc. cit.*, p. 555). La psychologie de M. Masaryk, qui a la prétention d'être une science, ne s'encombre pas de tant de procédés d'investigation ; l'*observation intérieure* lui suffit. Nous n'y contredisons pas ; mais ce procédé, un peu vieillot, n'a jamais conduit à la découverte d'aucune loi scientifique. Si certains psychologues le conservent pour la forme, ils

*Catéchisme positiviste*, 2<sup>e</sup> édit., Paris, 1894, pp. 222 et suivantes ; *Système de politique positive*, passim. — Nous nous faisons un devoir de rappeler que M. C. de Blighières, dans sa substantielle *Exposition abrégée et populaire de la philosophie et de la religion positives*, (Paris, 1857), a remarquablement fait ressortir tous les arguments en faveur de cette thèse du Maître, qui, elle aussi, comme la plupart des principes du Positivisme, semble destinée à devenir sous peu une vérité commune (Cf. de Roberty, *La Sociologie*, Paris, 1881, pp. 175 et suivantes).

(1) P. Laffitte. *Cours de philosophie première*, 2 vol., in-8°, Paris, 1889-1894.



lui préférèrent, dans l'application, la méthode comparée et l'exploration pathologique, c'est-à-dire l'étude de la pathologie mentale.

Nous ferons une dernière querelle à M. Masaryk ; il nous la pardonnera en raison de notre amour de la vérité qui seule, nous pousse à éplucher ainsi son livre.

Au-dessus, ou plutôt comme conclusion de sa classification des sciences, il place la philosophie. Qu'entend-il par là ? S'agit-il de la grande conception de la philosophie première, indiquée par Comte et si magistralement développée par notre vénéré directeur, M. P. Laffitte (1) ? En aucune façon ; la philosophie est pour notre auteur l'équivalent de la métaphysique. « *Philosophie* (= *Metaphysik*), » écrit-il ; il l'appelle encore « hyperscience (*Ueberwissenschaft*) ». Mais que peut bien être cette philosophie métaphysique, hyperscientifique ? M. Masaryk la résume dans les formules suivantes : « La philosophie est, à côté des sciences spéciales, la science générale ; elle est l'omniscience humaine. La philosophie est une représentation scientifique universelle. La philosophie est une conception du monde moniste (*einheitlich*). » Comme méthode, pour arriver à ses fins, elle doit employer la logique et, par suite, la psychologie ; mais « comment cette moderne métaphysique ou philosophie doit-elle être organisée pour répondre en fait aux sciences modernes », c'est un problème que notre auteur ne se charge pas de résoudre. « Parler est plus facile qu'agir, » conclut-il avec raison.

Ces idées n'ont pour nous rien de nouveau. Il y a une quarantaine d'années, alors que le Positivisme commençait à n'être plus une quantité négligeable dans la lutte ardente des doctrines, un philosophe français, M. Vacherot, dans son ouvrage sur « la métaphysique et la science », s'appliquait à concilier ces deux sœurs ennemies ; nous ne voyons pas qu'il ait réussi dans sa tâche. Avant M. Masaryk, il enseignait que : « La psychologie est le vrai sanctuaire de la métaphysique » ; et il en tirait naturellement la conclusion que « le philosophe ne trouve que dans ses profondeurs intimes le secret des grands mystères de la nature (1) ».

On voit que M. Masaryk, quoiqu'ayant beaucoup lu Comte et le citant souvent, n'est pas un disciple de la philosophie positive ; il s'en défend même. Et cependant, il a été imprégné de cette

(1) Voir notre article sur « M. Etienne Vacherot et la loi des trois Etats ». In la *Philosophie positive*, 1881, tome XXVI, p. 232.

doctrine plus qu'il ne veut se l'avouer. Mais la vérité positiviste ne lui a pas suffi ; il est allé puiser à d'autres sources et, de ce mélange d'idées de Comte, de Stuart-Mill, de Herbert Spencer et d'autres encore, — mélange très disparate, — est sorti un édifice philosophique d'un caractère composite, mi-partie scientifique, mi-partie métaphysique. De tels faits ne sont pas rares : on peut citer des savants et des philosophes qui, les premiers, sont partis de la science pour aboutir à la métaphysique et, les seconds, ont cherché dans la science un support à leurs conceptions transcendantes ; ce sont, en somme, des penseurs qui coquetent avec le Positivisme et ne veulent pas se donner à lui. Leurs tentatives, comme celle de M. Masaryk, sont de bonne foi ; elles font généralement preuve d'un savoir peu commun ; mais, solutions absolument bâtarde, elles ne peuvent entamer en rien la solidité, la grandeur et la majestueuse unité de l'œuvre de Comte.

D<sup>r</sup> ANT. RITTI.

---

### III

#### L'ESSAI SUR L'HISTOIRE DU SAINT-SIMONISME PAR M. CHARLÉTY

Sous le titre *Essai sur l'histoire du saint-simonisme*, la librairie Hachette vient de mettre en vente la thèse soutenue devant la Faculté des lettres de Paris par M. S. Charléty, professeur d'histoire au lycée de Lyon.

Il n'est pas possible à la *Revue occidentale* de rendre compte des publications, quels que puissent en être le mérite et l'intérêt, qui n'ont avec le Positivisme que des rapports très éloignés. Aussi n'aurions-nous pas fait mention du livre de M. Charléty, si l'auteur ne s'était livré, dans sa conclusion, à une appréciation du Positivisme qui nous paraît inadmissible.

Jusque-là, le travail de M. Charléty nous avait vivement intéressé et nous l'avions lu avec plaisir et profit, comme une œuvre consciencieuse et impartiale, écrite d'un style sobre et clair, parfois ému. L'auteur s'est défendu de juger, il a voulu faire simplement œuvre d'historien ; mais, dans sa conclusion, il se montre très affirmatif sur des points dont la liaison avec le récit qui précède n'est pas très manifeste. « La pensée saint-simonienne,

dit-il, se trouve à l'origine de deux systèmes, le positivisme et le socialisme, et d'un fait, l'industrialisme sous la forme moderne de la société par actions. »

Nous n'avons pas à intervenir en ce qui concerne le socialisme, et nous accordons volontiers que « d'anciens saint-simoniens comptent parmi les seigneurs de la *féodalité industrielle* » ; mais nous ne saurions accepter la prétendue filiation du positivisme envers le saint-simonisme, par cette raison unique, mais péremptoire, que cela n'est pas conforme à la réalité.

Nous sommes, d'ailleurs, de l'avis de M. Charléty sur les saint-simoniens. « Il serait injuste, dit-il, d'en rester, à l'égard de ces hommes, au sentiment de leurs contemporains et de ratifier l'arrêt de l'opinion qui, ayant raillé leurs excentricités et constaté l'échec retentissant de leurs retentissantes folies, se crut quitte envers eux, malgré tant de bonne foi et de bonne volonté. Dans ces Français qui, en un temps de raison pratique, de bon sens et de calcul, alors qu'ils auraient pu devenir des personnages dans la politique ou dans l'administration, s'y sont refusés, et ont cherché avec toute l'ardeur généreuse de la jeunesse une voie plus haute, il faut voir, sans doute, mieux que des ambitieux banals ou des échappés d'asiles, affublés d'oripeaux qui attirent la foule ou la police. On s'en persuade aisément lorsqu'on démêle les traits importants de leur œuvre et les résultats qu'elle a produits. » Cela est vrai, mais le positivisme n'est pas un de ces résultats, la preuve en a été faite il y a longtemps.

Dans sa *Notice sur l'Œuvre et la Vie d'Auguste Comte*, parue en 1860, et dont la troisième édition a été publiée en 1891, M. le Dr Robinet réfute longuement cette assertion que le positivisme émane du saint-simonisme. Auguste Comte avait, d'ailleurs, protesté lui-même, à plusieurs reprises, contre le reproche de déviation qui lui était adressé par les saint-simoniens. M. Pierre Lafitte s'est aussi expliqué sur ce point dans la *Revue occidentale*. La question est maintenant jugée.

L'erreur de M. Charléty, à cet égard, tient à son ignorance à peu près complète de la doctrine positiviste qu'il ne connaît que par ouï-dire ou par les écrits d'adversaires, trop souvent incompetents. Il n'a pas, évidemment, pris la peine de lire Auguste Comte, de sorte que l'opinion, erronée d'ailleurs et maintes fois réfutée, qu'il émet sur le positivisme, sur ses tendances et ses origines, ne lui est véritablement pas personnelle : il l'a acceptée de confiance sans remonter aux sources. Nous ne la relèverons pas. Nous savons que le but de M. Charléty était de conquérir un grade en Sorbonne et nous ne lui marchanderons pas nos félicitations pour le succès

qu'il a obtenu. Mais, si nous n'avons pas à juger la *thèse* du candidat, nous pouvons apprécier le *livre* et nous regrettons que l'auteur se soit trop hâté d'en publier la conclusion, au moins en ce qui concerne le positivisme. Une étude plus approfondie aurait certainement prouvé à M. Charléty que l'influence de Saint-Simon sur Auguste Comte n'a été qu'une simple excitation, grâce à laquelle celui-ci a plus promptement déterminé sa propre voie. Cette excitation a, d'ailleurs, été de courte durée, Auguste Comte n'ayant pas tardé à constater l'insuffisance scientifique et l'incohérence philosophique de celui qu'il avait d'abord appelé son Maître. Il est certain qu'Auguste Comte, à peine âgé de 20 ans, a été primitivement séduit par le langage et les manières de Saint-Simon, où revivait en partie ce grand XVIII<sup>e</sup> siècle qu'il avait tant étudié, et qu'il a dû s'appliquer de toutes ses forces à la solution des questions de réorganisation sociale qu'agitait superficiellement Saint-Simon. C'est ainsi qu'après quelques tâtonnements, Comte en vint à préciser et coordonner ses propres idées qui se trouvèrent en désaccord à peu près complet avec celles de Saint-Simon, non pas relativement au but qui, pour l'un comme pour l'autre, était alors l'exploitation industrielle du globe par les peuples civilisés, mais relativement aux moyens à employer et à la méthode à suivre pour atteindre ce but. En 1822, Comte écrivit le *Plan des travaux scientifiques nécessaires pour réorganiser la société*, qui doit être considéré comme le germe de ce qui devint plus tard le Positivisme, attendu que la vie tout entière d'Auguste Comte a été la réalisation graduelle de ce plan. Le *Contrat social* de Saint-Simon et son *Néo-Christianisme* étaient absolument incompatibles avec les idées, désormais arrêtées, d'Auguste Comte, et une rupture eut lieu.

Quant à l'école saint-simonienne, on voit, d'après l'histoire qu'en a faite M. Charléty lui-même, que la doctrine des saint-simoniens est de plusieurs années postérieure à l'opuscule fondamental d'Auguste Comte; d'où l'on pourrait inférer que le saint-simonisme n'est qu'une déviation de la ligne tracée par Auguste Comte, inflexiblement suivie par ce dernier jusqu'à sa mort, et dans laquelle marchent aujourd'hui de nombreux disciples. Mais ce serait là une conclusion forcée que nous indiquons uniquement pour appeler l'attention de M. Charléty sur un problème historique digne de son talent.

Nous serions heureux que M. Charléty, dans la prochaine édition de son livre, voulût bien tenir compte de l'avertissement que nous nous permettons de lui donner ici.

Ch. JEANNOLLE.

## IV

## SOLIDARITÉ, par M. LÉON BOURGEOIS

(Paris, A. Colin et Cie)

Ce petit livre mérite d'être signalé aux lecteurs de la *Revue Occidentale*.

M. Léon Bourgeois a été fortement impressionné par le Positivisme et surtout par son côté moral ; on le voit à chaque ligne de son opuscule auquel nous allons faire de nombreux emprunts. Mettons d'abord sous les yeux de nos lecteurs quelques pages véritablement éloquentes :

« L'homme ne devient pas seulement, au cours de sa vie, le débiteur de ses contemporains ; dès le jour même de sa naissance, il est un obligé. *L'homme naît débiteur de l'association humaine.*

« En entrant dans l'association, il y prend sa part d'un héritage accumulé par les ancêtres de lui-même et de tous ; en naissant, il commence à jouir d'un capital immense qu'ont épargné d'autres générations antérieures. Auguste Comte a depuis longtemps mis ce fait en pleine lumière : « Nous naissons chargés d'obligations de toute sorte envers la société. » Ce que Renan dit des hommes de génie : « Chacun d'eux est un capital accumulé de plusieurs générations, » est vrai non pas seulement des hommes de génie, mais de tous les hommes. La valeur de l'homme se mesure à sa puissance d'action sur les choses ; à cet égard, le plus modeste travailleur de notre temps l'emporte sur le sauvage de l'âge de pierre d'une distance égale à celle qui le sépare lui-même de l'homme de génie. Nous l'avons déjà dit : les aptitudes de notre corps, les instruments et les produits de notre travail, les instincts qui veillent en nous, les mots dont nous nous servons, les idées qui nous guident, la connaissance que nous avons du monde qui nous entoure, qui nous presse et que cependant nous dominons, tout cela est l'œuvre lente du passé ; tout cela, depuis le jour de notre naissance, est sans cesse mis par ce passé à notre disposition, à notre portée, et, pour la plus grande part, s'incorpore en nous-mêmes.

« Dès que l'enfant, après l'allaitement, se sépare définitivement

« de la mère et devient un être distinct, recevant du dehors les  
« aliments nécessaires à son existence, il est un débiteur ; il ne  
« fera point un pas, un geste, il ne se procurera point la satis-  
« faction d'un besoin, il n'exercera point une de ses facultés  
« naissantes, sans puiser dans l'immense réservoir des utilités  
« accumulées par l'Humanité.

« Dette, sa nourriture : chacun des aliments qu'il consommera  
« est le fruit de la longue culture qui a, depuis des siècles, repro-  
« duit, multiplié, amélioré les espèces végétales ou animales  
« dont il va faire sa chair et son sang. Dette, son langage encore  
« incertain ; chacun des mots qui naîtra sur ses lèvres, il le re-  
« cueillera des lèvres de parents ou de maîtres qui l'ont appris  
« comme lui, et chacun de ces mots contient et exprime une  
« somme d'idées que d'innombrables ancêtres y ont accumulée et  
« fixée. Lorsqu'il lui faudra non pas seulement recevoir des  
« mains des autres la première nourriture de son corps et de  
« leurs lèvres celle de son esprit, lorsqu'il commencera à créer  
« par son effort personnel les matériaux de son accroissement  
« ultérieur, il sentira sa dette s'accroître envers le passé.

« Dette, et de quelle valeur, le livre et l'outil que l'école et  
« l'atelier lui vont offrir : il ne pourra jamais savoir ce que ces  
« deux objets, qui lui sembleront si maniables et de si peu  
« de poids, ont exigé d'efforts antérieurs ; combien de mains  
« lourdes et maladroites ont tenu, manié, soulevé, pétri et sou-  
« vent laissé tomber de lassitude et de désespoir cette forme de  
« l'outil avant qu'elle soit devenue l'instrument léger et puissant  
« qui l'aide à vaincre la matière ; combien d'yeux se sont ouverts  
« et longuement fixés sur les choses, combien de lèvres ont bal-  
« butié, combien de pensées se sont éveillées, efforcées et  
« tendues, combien de souffrances ont été subies, de sacrifices  
« acceptés, de vies offertes, pour mettre à sa disposition ces ca-  
« ractères d'imprimerie, ces petits morceaux de plomb qui, en  
« quelques heures, répandent sur le monde, par millions d'exem-  
« plaires, l'innombrable essaim des idées, ces vingt-quatre  
« petites lettres noires où l'homme réduit et représente le sys-  
« tème du monde ! Et plus il avancera dans la vie, plus il verra  
« croître sa dette, car chaque jour un nouveau profit sortira  
« pour lui de l'usage de l'outillage matériel et intellectuel créé  
« par l'Humanité ; dette, à chaque pas sur la route, qu'au  
« prix de mille peines et souvent de mille morts les hommes  
« ont construite à travers le marais ou la montagne ; dette,  
« à chaque tour de roue de la voiture ou du wagon, à

« chaque tour d'hélice du navire ; dette, à chaque consommation d'un produit de l'agriculture, de l'industrie ou de la science ; dette envers tous les morts qui ont laissé cet héritage, envers tous ceux dont le travail a transformé la terre, rude et sombre abri des premiers âges, en un immense champ fertile, en une usine créatrice ; dette envers ceux dont la pensée a ravi aux éléments les secrets de leur puissance et les a, par cette puissance même, domptés et asservis ; dette envers ceux dont le génie a su, des apparences innombrables des êtres et des choses, dégager la forme et révéler l'harmonie ; dette envers ceux dont la conscience a tiré sa race de l'état de violence et de haine, et l'a peu à peu conduite vers l'état de paix et d'accord.

« Mais si cette dette est contractée envers les ancêtres, à qui sommes-nous tenus de l'acquitter ? Ce n'est pas pour chacun de nous en particulier que l'Humanité antérieure a amassé ce trésor, ce n'est ni pour une génération déterminée, ni pour un groupe d'hommes distinct. C'est pour tous ceux qui seront appelés à la vie, que tous ceux qui sont morts ont créé ce capital d'idées, de forces et d'utilités. C'est donc envers tous ceux qui viendront après nous, que nous avons reçu des ancêtres charge d'acquitter la dette ; c'est un legs de tout le passé à tout l'avenir. Chaque génération qui passe ne peut vraiment se considérer que comme en étant l'usufruitière, elle n'en est investie qu'à charge de le conserver et de le restituer fidèlement.

« Et l'examen plus attentif de la nature de l'héritage conduit à dire en outre : *à charge de l'accroître.* »

Il est impossible de dire mieux. Quel dommage que l'intelligence de notre auteur n'ait été, pour ainsi dire, qu'effleurée par les conceptions intellectuelles du Positivisme ! Assurément, le sentiment social, la moralité sont indispensables pour déterminer une intervention efficace dans les faits sociaux, mais cela ne suffit pas ; il faut que cette intervention soit éclairée par des vues véritablement scientifiques.

Après tout, cela est excusable pour un homme absorbé par la vie politique de ne point pénétrer au fond des choses. En fait Gambetta n'avait certainement qu'une connaissance superficielle du Positivisme et pourtant il a réalisé, à bien des égards, le type de l'homme d'Etat moderne. Il avait tout de suite deviné, en homme supérieur qu'il était, toute l'importance de la doctrine de Comte, rien qu'à l'examen de quelques formules ; celle-ci : « Le

progrès n'est que le développement de l'ordre » l'avait frappé, elle répondait à ses aspirations et elle a suffi pour diriger sa conduite politique. Gambetta a fait ce qu'il était urgent de faire au moment où il a surgi : transformer le parti républicain, faire durer la République et finalement décider l'opinion en faveur de la seule forme de gouvernement, aujourd'hui possible en France.

Donc, il ne faut pas trop demander à l'homme d'action même lorsqu'il aspire passagèrement au rôle de théoricien ; la pratique rectifie souvent ce qu'il peut y avoir d'imparfait dans les vues de l'esprit. Notre critique se bornera par conséquent à quelques observations.

Signalons tout d'abord une grave lacune. Les sciences cosmologiques et la biologie ne suffisent point pour diriger la pratique sociologique, il faut s'appuyer sur une science plus élevée : la *Sociologie*, qui a une méthode distincte et repose sur des inductions qui lui sont propres. Sans doute, les phénomènes sociaux sont assujettis aux lois de la vie, mais ils sont en outre gouvernés par des lois d'un nouvel ordre. Logiquement et pour la clarté du discours il est permis, sans doute, aux sociologues d'emprunter des exemples à la biologie, de faire des comparaisons entre les deux classes de phénomènes vitaux et sociaux. Mais, comparaison n'est pas toujours raison ; je n'en veux pour preuve que l'assimilation du corps social à un être vivant qui conduit à identifier le consensus vital et le concours social. M. Bourgeois indique bien qu'il voit toute la différence qui existe entre ces deux notions, mais ses réserves restent verbales et n'ont pas toutes les conséquences logiques qu'elles devraient avoir.

Dans l'acceptation de la *Sociologie* comme science distincte et prépondérante se trouve le nœud des difficultés qui assiègent bon nombre d'esprits distingués, exposés à sombrer dans le chaos métaphysique faute de cet appui solide. Avec les meilleures dispositions mentales, M. Bourgeois côtoie souvent l'abîme.

Le mot *science* est maintenant invoqué d'une façon constante, tout passe grâce à ce terme devenu magique. Le premier charlatan venu s'impose à l'attention avec ce talisman, les conceptions les plus sottes s'affublent de ce titre. Science, la statistique qui réduirait l'étude des phénomènes complexes de la société à des opérations numériques élémentaires. Science, la moderne doctrine évolutionniste qui prend un simple corollaire de la loi biologique de l'hérédité pour une loi universelle applicable aussi



bien aux espèces végétales et animales qu'à l'espèce humaine. Rien pourtant n'est plus faux ni plus immoral et M. Bourgeois, tout en paraissant admettre la prétendue loi de la lutte pour la vie, se rend bien compte de ce qu'elle présente d'odieux. Cette prétendue loi est non seulement immorale mais elle est fausse aussi bien au point de vue vital qu'au point de vue social. Le milieu organique et inorganique est beaucoup moins défavorable aux êtres faibles qu'on ne le prétend; la modifiabilité des êtres, tout en étant réelle, est infiniment moins grande que ne le prétendent les évolutionnistes. L'observation séculaire et universelle a établi, comme une vérité fondamentale, la loi de la fixité des espèces et tout au plus pourrait-on concéder que la transformation d'une espèce en une autre s'opère d'une façon tellement lente, tellement imperceptible qu'on doit la considérer comme nulle.

Transportée dans le domaine social, la doctrine de la lutte pour la vie est tout aussi absurde. L'état de société tend de plus en plus à préserver les faibles, voyez le chemin parcouru depuis l'anthropophagie primitive ! En raison de nos dispositions bienveillantes innées et du progrès social, les faibles sont de plus en plus protégés et utilisés. L'abus de la force, musculaire ou autre, devient de moins en moins possible par la coalition toujours imminente des natures moyennes ou faibles qui forment la majorité. Donnez à cette majorité des sentiments communs et des opinions communes et fixes et vous verrez ce que deviendront « les forts » préoccupés de leur seule personnalité !

Au nom de la science, donc, on propage beaucoup d'idées fausses et dangereuses. A l'heure qu'il est, qui donc ne fonde pas une science nouvelle ? C'est à la portée du premier venu !

Le public, même cultivé, n'est pas à l'abri de cette contagion. On prend du goût pour les notions vagues, pour les généralisations hasardées et cela au détriment de la vraie science, de la science utile, tant il est vrai que l'espèce humaine a du mal à se débarrasser de l'ontologie et à s'élever à la saine positivité.

M. Bourgeois attend la solution des difficultés politiques et sociales actuelles d'une doctrine nouvelle, celle de la « solidarité », également distante de l'économisme et du socialisme ou plutôt supérieure à l'une et à l'autre dans leur propre domaine. L'économisme exagérant la notion de *liberté*, le socialisme opprimant l'individu au nom du *concours*.

« Les socialistes — non pas ceux qui haïssent et prêchent la violence, mais ceux qui veulent la paix et qui aiment — ont

« raison de condamner l'indifférence et de poursuivre la guérison  
« du mal ; les économistes ont raison de soumettre aux règles de  
« la science des faits toute tentative de remède, » page 36.

Mais où sont maintenant les socialistes qui *aiment* ? où sont les économistes qui s'appuient sur la science ? En réalité, les socialistes ne représentent pas plus l'« *idée morale* » que les économistes ne représentent la raison. Comme nous venons de le dire, M. Bourgeois sent confusément tout cela, aussi s'élève-t-il justement contre la doctrine qui prêche l'impassibilité en face des luttes économiques. Au nom des intérêts supérieurs de la collectivité qui a, quoi qu'en dise M. Bourgeois, une existence distincte et réelle, nous repoussons aussi le « laisser faire, laisser passer ». Cependant, ce n'est pas une raison pour approuver l'action perturbatrice ou désordonnée ; il vaut mieux ne rien faire que de mal faire.

Nous avouons ne pas bien comprendre ce qu'est la doctrine nouvelle dont M. Bourgeois semble prédire le prochain avènement, sa définition de la « Solidarité » nous paraît un peu obscure :

« Mais ces rapports de dépendance réciproque entre les parties  
« des êtres vivants existent également entre les êtres eux-  
« mêmes, et aussi entre l'ensemble de ces êtres et le milieu où ils  
« sont placés. Les lois de l'espèce — lois d'hérédité, d'adaptation,  
« de sélection, lois d'intégration et de désintégration — ne sont  
« que les aspects divers de la même loi générale de dépendance  
« réciproque, c'est-à-dire de solidarité, des éléments de la vie  
« universelle. »

La devise : *Solidarité* n'est pas, à notre avis, la devise d'un homme politique ; à tout prendre, elle ne vaut guère mieux que : *Charité* ou *Fraternité*, elle est imprégnée d'un sentimentalisme aussi vague.

Combien nous préférons : *Ordre* et *Progrès* si sagement acceptée par Jules Ferry ; cette dernière est la condensation de la devise de Comte : l'amour pour principe et l'ordre pour base ; le progrès pour but. Réduite à deux termes, elle convient parfaitement à l'homme de gouvernement qui doit laisser à d'autres le soin de développer nos sentiments affectueux.

A ce propos, qu'il nous soit permis d'insister sur l'admirable précision des formules de Comte. Ainsi dans : *Vivre pour autrui*, vivre d'abord, concession indispensable aux instincts de la personnalité. Dans la formule complémentaire : pour la *Famille*, la *Patrie* et l'*Humanité*, êtres collectifs qui représentent *autrui*, la succession indique la marche que doit suivre et que suit forcée-

ment notre sociabilité. Aux sentiments familiaux se mêle nécessairement et utilement un peu d'égoïsme, le patriotisme n'en est pas exempt, quoiqu'à un moindre degré et enfin dans l'amour de l'espèce le sentiment social s'épure définitivement mais est infiniment moins énergique.

Les observations qui précèdent ne doivent pourtant point faire perdre de vue qu'il y a dans l'opuscule de M. Bourgeois beaucoup de choses excellentes, preuve nouvelle de l'action croissante du Positivisme. Nous l'avons dit, le côté moral surtout a séduit M. Bourgeois, citons encore :

« Le bien moral sera désormais, comme l'a dit Secretan, de nous vouloir et de nous concevoir comme membres de l'Humanité. Le mal sera de nous vouloir isolément, de nous séparer du corps dont nous sommes les membres, » page 36.

Et en note :

« M. Izoulet a donné de la même pensée une autre formule très intéressante. Répondant aux socialistes qui croient trouver dans l'abolition de la propriété individuelle la solution du problème social, il répond : « Ce n'est pas la socialisation des biens, c'est la socialisation de la personne qu'il s'agit de réaliser. »

Et pour finir, montrons que M. Bourgeois n'est point resté étranger à quelques conceptions philosophiques et générales de Comte.

« La méthode scientifique pénètre aujourd'hui tous les ordres de connaissances. Les esprits les plus réfractaires viennent, tout en protestant, s'y soumettre peu à peu.

« La vérité, dans le domaine sociologique, comme dans tous les autres, apparaît comme ne pouvant être obtenue que par la constatation impartiale des faits.

« Les phénomènes économiques et sociaux obéissent, on le sait désormais, comme les phénomènes physiques, chimiques et biologiques, à des lois inéluctables. Les uns comme les autres sont soumis à des rapports de causalité nécessaires, que l'induction méthodique permet seule à la raison de connaître et de mesurer.

« Les phénomènes sont ici plus complexes et l'observation en est plus difficile, l'expérimentation ne peut y être que rarement tentée ; mais la complexité des phénomènes et la difficulté de leur étude ne changent rien à la rigueur de leur enchaînement. On sent que toutes les théories subjectives et que toutes

« les généralisations du verbalisme philosophique sont impuissantes à les expliquer et à les régler.

« Il n'est pas de pouvoir politique assez puissant pour décréter la bonne et la mauvaise fortune, parce qu'il n'en est pas qui puisse décréter la santé ou la maladie, l'intelligence ou la déraison, la paresse ou l'énergie, l'esprit d'ordre ou de prodigalité, la prévoyance ou l'insouciance, l'égoïsme ou le désintéressement.

« Tout ce qui sera tenté en dehors des lois naturelles ou contre elles est donc vain et condamné d'avance au néant. Les systèmes des réformateurs reconstruisant le monde social à l'image de leur rêve, fût-ce d'un rêve de génie, ont tout juste autant de réalité et de chances de durée que le système de Ptolémée.

« Mais il ne suffit pas qu'une science ait trouvé, pour être constituée, ses méthodes et ses voies. Son objet, son caractère, sa nature propre doivent être clairement connus et définis. Or, le problème des rapports de l'homme et de la société est d'une nature particulière. Ce n'est pas une simple curiosité intellectuelle, c'est une nécessité morale qui le pose devant nous ; ce n'est pas seulement une vérité de l'ordre intellectuel, c'est une vérité de l'ordre moral qu'il a pour objet de dégager.

« Les découvertes des sciences physiques n'ont pas seulement été pour l'homme un simple spectacle, lui donnant du monde une vue plus vraie ; elles lui ont permis de transformer la face de ce monde et de faire des forces de la nature, figures jusquelà voilées, déesses mystérieuses et redoutées, des esclaves soumises à sa volonté.

« Ce que la découverte des lois du monde physique a permis de faire pour la transformation de la vie matérielle, la découverte des lois du monde moral et social doit le permettre pour la transformation de la vie sociale elle-même. »

Nous ne dirions pas autre chose et il serait difficile de le faire en termes meilleurs.

Camille MONIER.

---

# NÉCROLOGIE

---

## MADAME GRANJON

Le 6 septembre dernier, un grand nombre de positivistes on assisté aux obsèques civiles de notre coreligionnaire M<sup>me</sup> veuve Granjon, et M. Keuffer a interprété en ces termes les sentiments de tous :

Mesdames, Messieurs,

La femme modeste que nous accompagnons aujourd'hui à sa dernière demeure ne peut quitter sa famille ni ses amis sans que nous adressions un suprême hommage à sa mémoire et sans signaler les titres qu'elle avait acquis à la considération de ses coreligionnaires positivistes.

C'est en leur nom que je me permets de prendre la parole sur cette tombe pour indiquer quelle vie simple, active, honnête a été celle de M<sup>me</sup> Granjon, représentant le type de l'humble femme acceptant courageusement les lourdes charges que la fatalité lui avait imposées.

Dès 1853, la famille Bourdon était cruellement frappée par la mort de son chef qui laissait une veuve et trois jeunes filles, dont M<sup>me</sup> Granjon était l'aînée. Cette famille, laissée ainsi sans aucune ressource, fut soumise à la rude école de l'adversité, et ce n'est que grâce à l'énergique et persévérant effort de la mère aidée de ses jeunes filles que la famille put s'élever et satisfaire aux rudes exigences de la vie, rendues plus lourdes depuis la mort du père dont le salaire faisait défaut.

A cette époque, comme aujourd'hui, la situation des femmes seules, sans appui, présentait, au point de vue social, les plus graves inconvénients matériels, et c'est au milieu de ces difficultés que les demoiselles Bourdon réussirent par un travail opiniâtre, par une vie exemplaire, à se suffire, à acquérir même une éducation un peu plus soignée que celle de la plupart des femmes de cette condition, et purent ainsi rendre l'existence de leur mère plus heureuse, l'entourant de soins et d'affection jusqu'à sa mort.

Mais cette première et dure épreuve qui marqua les débuts de cette femme dans la vie ne fut pas la seule : à peine mariée à notre cher et toujours regretté coreligionnaire M. Granjon, dont les amis ont gardé le souvenir des rares qualités de cœur, d'intelligence et d'activité, elle devint veuve après deux années d'une vie commune heureuse, qui avaient suffi à notre ami pour faire de son épouse une positiviste convaincue, acceptant très résolument la doctrine nouvelle, destinée à régénérer la société en substituant au culte théologique le culte plus réel de l'Humanité.

Cette fin si prématurée, outre qu'elle fut une perte sérieuse pour le Positivisme, fut une nouvelle et cruelle épreuve pour la veuve, qui, devenue mère peu de jours auparavant, voyait se dresser cet effrayant problème de la destinée de la femme, accablée par les revers, abandonnée sans soutien au milieu de la société

actuelle qui exige le dévouement à la famille, la dignité dans la conduite, sans assurer en échange les conditions matérielles nécessaires à l'existence.

Dilemme redoutable qui se pose en attribuant à la femme prolétaire de lourdes obligations sociales, sans lui assurer les moyens de les remplir ; tout au contraire, on peut dire que les exigences de la situation économique sont plus inexorables pour la veuve, pour la femme qui a besoin de travailler que pour celle qui est dispensée de tout souci de famille. Il y a là un problème grave qui se pose et sur lequel doivent se porter les méditations des philosophes et de tous ceux que préoccupe la situation de la femme dans le milieu social moderne.

M<sup>me</sup> Granjon, loin de se décourager en présence d'un avenir qui apparaissait si sombre, accepta avec une sage résignation cette injuste épreuve : ce ne fut pas la résignation qui peut être quelquefois le résultat de l'absence de toute volonté, ce fut au contraire une courageuse subordination aux fatalités extérieures, qui n'excluait pas chez elle la générosité des sentiments, allant jusqu'à l'imprévoyance.

Aidée par sa sœur, non moins dévouée qu'elle, courageuse au travail, et avec le concours occasionnel d'amis discrets, M<sup>me</sup> Granjon put conserver le foyer où s'éleva son fils.

La vie honorable de cette famille qui a su traverser dignement la période la plus difficile de son évolution est une nouvelle manifestation — et il faut toujours le répéter — de la nécessité, pour les natures trop bienveillantes et généreuses — de ne pas se livrer exclusivement aux suggestions d'une sentimentalité excessive, mais de guider celle-ci par les conseils de la raison.

Cette tombe ne doit pas se refermer sans que nous dégagions l'enseignement qui ressort de la conduite de M<sup>me</sup> Granjon, c'est qu'elle a été un intéressant exemple des dispositions de la femme prolétaire à accepter le Positivisme au double point de vue philosophique et religieux, signe de la possibilité de l'émancipation théologique de la femme. La fidélité rigoureuse de M<sup>me</sup> Granjon aux idées de son mari après sa mort est le plus bel hommage que nous puissions rendre à son caractère et à son intelligence.

Il nous appartient donc, à nous positivistes, de conserver pieusement le souvenir de cette digne femme qui a supporté avec courage les souffrances dont la nature aveugle l'avait affligée, et cela sans espoir de récompense surnaturelle, montrant le fortifiant exemple d'une foi ardente en une doctrine qui enseigne à chacun de nous de vivre pour autrui.

Son fils, sa famille, ses amis, ne pourront mieux respecter sa mémoire qu'en restant attachés aux convictions auxquelles — autant que son mari — elle est restée fidèle toute sa vie.

Nous adressons, au nom de tous les positivistes, un dernier adieu à cette mère dévouée, à cette courageuse prolétaire, qui a été un modèle de résignation au sort qui lui a été infligé, sans que rien ne justifiait une aussi cruelle destinée.

# TABLE DES MATIÈRES DU TOME <sup>quatrième</sup> ~~QUATRIÈME~~

(SECONDE SÉRIE)

## N° 4

|                                                                                                                                                                                                                                                                                                                                                                               | Pages |
|-------------------------------------------------------------------------------------------------------------------------------------------------------------------------------------------------------------------------------------------------------------------------------------------------------------------------------------------------------------------------------|-------|
| L'Inconnaissable, par le Dr BRIDGES. . . . .                                                                                                                                                                                                                                                                                                                                  | 1     |
| Auguste Comte et le Protestantisme, par Ch.-G. HIGGINSON. . . .                                                                                                                                                                                                                                                                                                               | 7     |
| Bulletin d'Angleterre. — Société positiviste de Londres (Newton-Hall) : Conférence du Dr J. KAINES, sur <i>La Tempête</i> de Shakespeare. . . . .                                                                                                                                                                                                                             | 12    |
| Bulletin de France. — I. <i>Rapport tendant à rechercher les moyens de parer aux funestes conséquences du système actuel des adjudications</i> , par A. KRUFER. — II. <i>Réception de M. et M<sup>me</sup> Nyström, et de M. Raphaël Petrucci</i> , par la Société positiviste de Paris. — III. <i>Le Positivisme à l'Alliance des Savants et des Philanthropes</i> . . . . . | 27    |
| Bulletin d'Italie. — Statuts de la Société positiviste de Rome. . .                                                                                                                                                                                                                                                                                                           | 90    |
| Variétés. — I. <i>Le Calife et ses devoirs</i> , par Ahmed RIZA. — II. <i>Beethoven et ses trois styles</i> , par A.-M. AUZENDE. . . . .                                                                                                                                                                                                                                      | 93    |
| Bibliographie. — I. Traduction suédoise du <i>Discours sur l'ensemble du Positivisme d'Auguste Comte</i> , par M <sup>me</sup> NYSTROM et M. C. BILLEBORQ. — II. <i>Publications</i> du Dr JABELY. . . . .                                                                                                                                                                    | 101   |
| Matériaux pour servir à la Biographie d'Auguste Comte : <i>Un mémoire du père d'Auguste Comte</i> . . . . .                                                                                                                                                                                                                                                                   | 113   |
| Avis . . . . .                                                                                                                                                                                                                                                                                                                                                                | 137   |
| Nouvelles. . . . .                                                                                                                                                                                                                                                                                                                                                            | 138   |

## N° 5

|                                                                                                                                                                                                                                             |     |
|---------------------------------------------------------------------------------------------------------------------------------------------------------------------------------------------------------------------------------------------|-----|
| A propos du mot « Positif », par le Dr BRIDGES . . . . .                                                                                                                                                                                    | 139 |
| Le Centenaire de Burns, par le juge VERNON LUSHINGTON. . . . .                                                                                                                                                                              | 153 |
| Bulletin d'Angleterre. — Société positiviste de Manchester : <i>Rapport de MM. Ch.-G. HIGGINSON et Charles MELLOR</i> . . . . .                                                                                                             | 176 |
| Bulletin de France. — I. Auguste Comte et l'Evolution moderne : en philosophie, en science, en art, en politique; <i>Positivisme et Opportunisme : Discours</i> de MM. WALDECK-ROUSSEAU et Constant HILLEMANT. — II. Cercle des Prolétaires |     |

|                                                                                                                                                                                                                                             | Pages. |
|---------------------------------------------------------------------------------------------------------------------------------------------------------------------------------------------------------------------------------------------|--------|
| positivistes de Paris : <i>Compte rendu du Congrès socialiste international de Londres</i> , par M. FAGNOT. — III. <i>Discours de M. VORBE</i> à la distribution des Prix des Ecoles communales du XIX <sup>e</sup> arrondissement. . . . . | 178    |
| Variétés. — I. <i>Patriotisme local</i> , par M <sup>me</sup> Frédéric HARRISON. — II. <i>Auguste Comte et son siècle</i> , par Emile FAGUET. . . . .                                                                                       | 253    |
| Nouvelles . . . . .                                                                                                                                                                                                                         | 268    |

N<sup>o</sup> 6

|                                                                                                                                                                                                                                                                                                                                                                                                                                                                                                                                                                                                                                                                  |     |
|------------------------------------------------------------------------------------------------------------------------------------------------------------------------------------------------------------------------------------------------------------------------------------------------------------------------------------------------------------------------------------------------------------------------------------------------------------------------------------------------------------------------------------------------------------------------------------------------------------------------------------------------------------------|-----|
| Introduction à l'appréciation des Grands Types du Catholicisme, par Pierre LAFFITTE . . . . .                                                                                                                                                                                                                                                                                                                                                                                                                                                                                                                                                                    | 271 |
| Les Conditions sociologiques de la Production esthétique, par Raphaël PETRUCCI. . . . .                                                                                                                                                                                                                                                                                                                                                                                                                                                                                                                                                                          | 275 |
| La Tolérance musulmane, par Ahmed RIZA . . . . .                                                                                                                                                                                                                                                                                                                                                                                                                                                                                                                                                                                                                 | 304 |
| Bulletin de France. — I. Célébration du 38 <sup>e</sup> anniversaire de la mort d'Auguste Comte, à Paris : <i>Discours de MM. Raphaël Petrucci, Fagnot, Frédéric Harrison</i> . — II. Groupe positiviste bordelais : <i>Discours de M. Mignoneau</i> . — Nouvelles . . . . .                                                                                                                                                                                                                                                                                                                                                                                     | 318 |
| Bulletin de Belgique. — Discours de M. Hector DENIS, à l'Université libre de Bruxelles, sur la <i>Mission sociale de la Philosophie positive</i> . . . . .                                                                                                                                                                                                                                                                                                                                                                                                                                                                                                       | 336 |
| Variétés. — I. <i>Récentes impressions de France</i> , par Frédéric HARRISON. — II. <i>Le Positivisme à la portée des enfants</i> , par le Dr Louis DOR, suivi de <i>l'Éducation de la seconde enfance</i> , par Pierre LAFFITTE. III. <i>Pierre Laffitte</i> , par M. WECHNIAKOFF. — IV. <i>Perpétuité</i> , par GILLET. . . . .                                                                                                                                                                                                                                                                                                                                | 365 |
| Bibliographie — I. <i>Les problèmes relatifs à l'idée d'Auguste Comte sur la Société dans ses rapports avec l'ensemble de son système</i> (Dissertation inaugurale présentée à la Faculté de Philosophie d'Iéna), par Hermann LIETZ : appréciation du Dr Ant. RITTI. — II. <i>Essai d'une logique concrète : Classification et Organisation des Sciences</i> , par le Dr Thomas-G. MASARYK, professeur à l'Université tchèque de Prague : appréciation du Dr Ant. Ritti. — III. <i>Essai sur l'Histoire du Saint-Simonisme</i> , par CHARLETY : appréciation de Ch. JEANNOLLE. — IV. <i>Solidarité</i> , par Léon BOURGEOIS : appréciation de C. MONIER. . . . . | 391 |
| Nécrologie. — M <sup>me</sup> Granjon, par A. KEUFER. . . . .                                                                                                                                                                                                                                                                                                                                                                                                                                                                                                                                                                                                    | 424 |



# PUBLICATIONS DE L'ECOLE POSITIVISTE

En vente aux Bureaux de la REVUE OCCIDENTALE

- EMILE ANTOINE.** — *De la Morale positive*, 3 fr. 50. — *Notice sur M. Pierre Laffitte*, 1 fr. — *Conseils de Condorcet à sa fille*, 0,50 c.
- D<sup>r</sup> AUDIFFRENT.** — *Appel aux Médecins*, 1 vol., 3 fr. 50.
- A. M. AUZENDE.** — *Considérations générales sur les tonalités*, 0,50 c.
- CH. AVEZAC-LAVIGNE.** — *Diderot et la société du baron d'Holbach*, Paris (Ern. Leroux), 1 vol., 7 fr. — *Traduction française de la Condensation par miss Martineau, de la Philosophie positive*, 2<sup>e</sup> édit., 2 vol., 16 fr. — *Traduction française du Nouveau Calendrier des Grands Hommes*, par F. Harrison, 2 vol. 13 fr.
- D<sup>r</sup> L.-P. BARETTO.** — *Positivismo e Theologia.* — *As tres Philosophias.* S. Paulo (Brésil).
- CABINO BARREDA.** — *Apresiasi de los progressos de la Astronomia física o mejor de la Física astronomica : Estudio brajo el punto de vista positivo.* Mexico.
- F.-B. BARTON.** — *An outline of the positive religion of Humanity of A. Comte.* London, 1867 (Truelove). — *The religion of Humanity.* 1877.
- TEIXEIRA BASTOS.** — *Principios de Philosophia positiva extrahidos de Curso de Philosophia positiva de A. Comte.* Porto, 1883 (Magalhaes et Moniz), 2 vol. in-8°.
- E.-S. BEESLY.** — *The Social Futur of the Working Classes*, London, 1869 (W. Reeves), 3<sup>e</sup> édit., 1 d. — *Letters to the Working Classes*, 1 p. — *A word for France*; addressed to the workmen of London, 1870, 6<sup>e</sup> édit. — *Some Public Aspects of Positivism*, 1881, 3 d. — *Chart of Ancient History*, 1 d. — *Chart of Medieval and Modern History*, 1 d. — *Comte as a Moral Type*, 3 d. — *The Life and Death of William Frey*, 2 d. — *Positivism before the Church Congress*, 1 d. — *Queen Elizabeth* (Macmillan), 2 s. 6 d.
- D<sup>r</sup> W. F. BLAKE.** — *Some neglected passages of the « Culte historique » from Comte's Appeal to Conservatives.* London, 1890 (Trubner et Co).
- F.-W. BOCKETT.** — *The Worsman's Life; What it is, and What it might be.* London (W. Reeves), 2 d.
- F.-A. BRANDAO.** — *A Escravatura no Brazil.* 1857. Bruxelles.
- D<sup>r</sup> BRIDGES.** — *The Unity of Comte's Life and Doctrine*, London, 1866 (out of print). — *Discourses on Positive Religion*, Contents: *Prayer and Work; Religion and Progress; Positivist mottoes; Centenary of Calderon; Man the Creature of Humanity; Comte the successor of Aristotle and S. Paul* (W. Reeves), 1 s. — *Positivism and the Bible*, 9 d. — *Colbert and Richelieu.* — *A Catechism of Health*, adapted for primary schools, 1 d. — *The Influence of civilisation on Health*, 6 d. — *The Moral and social aspects of Health*, 2 d. — *History, an Instrument of Political Education*, 3 d. — *Progress*, 1 d. — *Centenary of the French Revolution*, 4 d. — *A general View of Positivism*, translated from the French of A. Comte, 8 s. 6 d. — *Harvey and his Successors*, Oration delivered at the royal Collège of Physicians of London (Macmillan), 1 s.
- W.-M.-W. CALL.** *Translation of the Preliminary Discourse on the Positive Spirit*, Cambridge, 2 s. 6 d. — *Golden Histories*, 1871. — *Reverberations*, 2<sup>e</sup> édit. 1876.
- THE NEW CALENDAR OF GREAT MEN :** *Biographies of the 558 worthies of all Ages and Nations in the positivist Calendar of A. Comte* (London and New-York, Macmillan, cash price 7/6 net) by : — E. Spen-

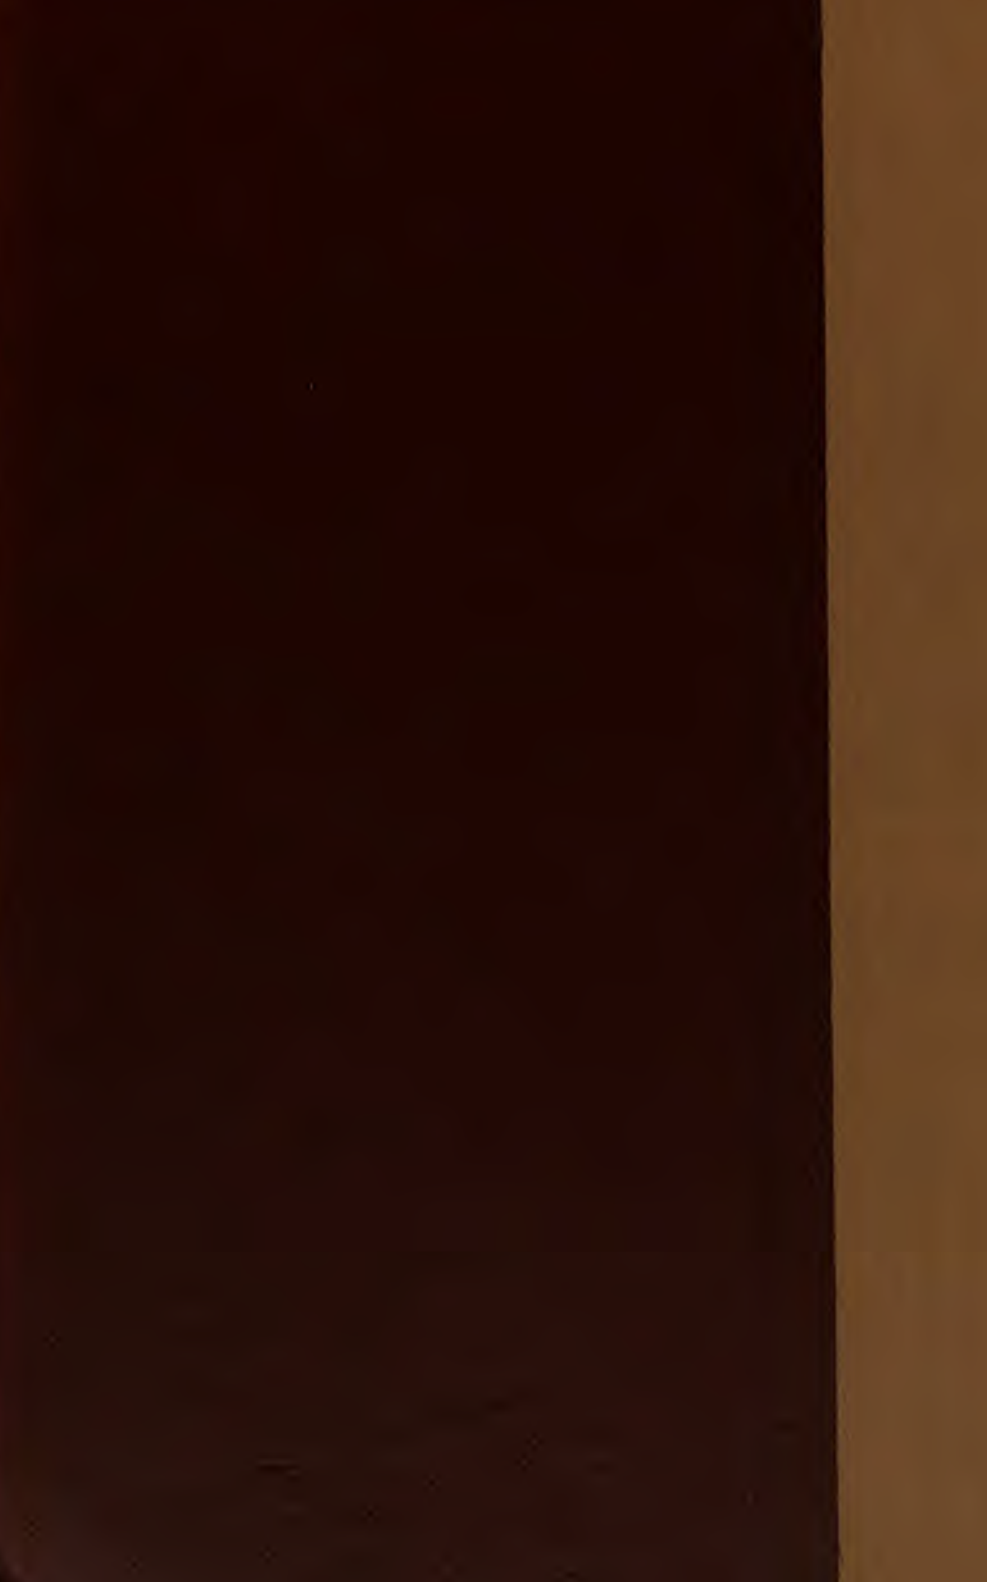

Supplement: Supplementary file 2 [file La Revue Occident1896 P. 103.pdf › Primary Sources/La Revue Occident1896 P. 103.pdf]
