# Supplementary material
Source: Research Square preprint supplement (doi:10.21203/rs.3.rs-9653111/v1)
Supplement: Supplementary file 1 [file Ezan.pdf › Primary Sources/Ezan.pdf]

عموده سربلجی که ' سزا اولسون اولماملار که اوکا تاملار  
 سیرملاندیلمه مشو فاضل و اخلاص و حمید و حاجی گیلدیکه  
 و کسانه گوره پله دعوات و عبادات - بئز تریکی اولماملار اول  
 حقیقت حالده - چاهادی اویا <sup>بیر تریکی</sup> لکله هاکی رتور و تونوسه  
 ایلر ' ایشک اولمک قیلیمز - حالیکه مشو برجه نلک -  
 ولی نعمته فارسی خدمت و مطاقتی ابری طرفه کی عهد و سنه  
 اولمسه ایشکری یوزی اوستی بر اترمه - باخوص امانت  
 نل ایدیک و افند سینگ حضوریه جیمیه باسقه  
 طرفه دن <sup>بیر</sup> دیم ورمایه سده ؛ ازیم - یوزیمه صوره  
 و خوصصه تحت ایدیک اولرمان - عقیق و یوزیمه  
 ایکی گیم فایم ' گونوز صاعلمه ... دنا ایدیه ال  
 اونا عجب وقت بولم یوزیم - حق یونی برمدار نفاخر گیم  
 بولوریمیز ' بیلدیکه سزده به بر بللک دار - منقعه یونی  
 کونک وار ' بولمک ازیمه ' سزده آنه ورمیه ؛ او دهر  
 که ایچیم یوزیمه ...

اولر شمسک ' قلب گونز لریمیز خری قایمسه طلمتی  
 لور حاصولیم ... یامور میسکیز که ای شمسک ... حرماتی  
 ایچیمون افند عالم بقاده ده اولر شمسکیز ؛ فقط قاضی باغ  
 اید بولیمه عقیقه ایدیک لکیمیز بیکز خان اولر قاضی  
 اولر حرماتیمه بولمک کز کزیم ' عسکی نقیده اینه  
 حقیقت نلک بیک بلاییم اولر حرماتی ' حق نمده اولر مایه  
 یامور میسکیز ... یامور میسکیز که ای مسلم - عثمانی - لر ...  
 بولمک ازیمه سزده ' اطرافکرده که - حرماتیم - وطن  
 سکریمزده خاتم آتیمه ایلیم ... جان هلیسور اولور !  
 دوشونیز ' طیش گوزل بیلیمز ' باخوص بالک شخصی احاط  
 دیم نلک ایفانه حالیم قلمه یوزیم یوزیمون حالیم  
 اولر حقیقی یامور میسکیز ... اسموسیه آتیمه بولمک امر لور  
 یامور میسکیز که الله قولمده کیمه آج دور حقه و مایه  
 قالمق اولرمان ... یعنی ؛ انسانک ' مشو گیمای ' ایچیم  
 حاضر دیان انسانلر حاله شوب اولر لعی ورنه کیمیه ؛  
 یعنی ؛ ' یاری ' قولدیک واسطه ایدیک اولرمان و افسانیه  
 واجب و یا خصله ارسون عیادت شیریم ' ایشته حضور کیم  
 لک ' باطله تر ' تبه کیم ' دیم یامور ایچیم ها خصله گوریم

النه تسبیح و سزده ابریمک آلمیه ما چینی یامور میسکیز ...  
 یامور میسکیز که اسموسیه بولمک سزده ور - شایسته بولیم  
 حالیکه شحرکات و سکنا کیمه با تلیج - امان یاری - قتا -  
 کتاب و سنت بیک او هیوزیم اولمک دیکلر - با شحرور گیم  
 اوت ... حالیکه ' فالکزه ' پیورده اعتقاد اکثره وقتا  
 لور حقه اولر سیم ایدیک سزیمکه ازیمه (الله ورسول  
 بر مومن و منه به برامی قضا ایدیکه بونی بر اقوب ده ایشته  
 کئی یامور اولرمان) گئی احاط بولورمان ؛ (دنا آخرت  
 تالیسمه) حقیقتیمیز ؛ باکیز : (دنا ده ایشته یوزیمه سز)  
 قالمیه ' با عید لورده کی صفای حکمی ده غائب اولمیه ؛  
 دنا عید آخیز آنه یغنی نلک ایچیم محتاج اولریمیز  
 قوریمزده ' راکتیمزده قالمیمزده ... بولیم ' حفظ  
 ان شریعت گیم فایم و ایدیک ده ' وار لکیمزده  
 قالمیمیزده رعایمیزده ... بولیم ' ایشیمیز ...

قار دیمیز ' ای شریعت احمد سیر سده فاضل  
 ایدیم مسلم - عثمانی - لر ... بولیمیمه لعی با فیکیز  
 مسلمان لکیمز ؛ ایکی مسلمان لکیمز اولیمز ... آگاه اولیمز که نه  
 یامور بولوریمک حوکیم یوزیم ' یوقدر ' ایشیمز ...  
 ایشیم بولوریم مکره اولرمان ' یوقدر ' بولوریم ' یونی  
 ایچیمیز ... بیلدیکه قول قورده خدمت ایلیمده حوکیمه ..  
 حقی دیمده حضور حقه حقیقتمان ...

(مولد قبل ان تولد) ای مسلم - عثمانی - لر ...  
 حاضر یامور میسکیز ' بره دیکل ' قلمده ' اطراف و احوال  
 گوز اوگنه گیمیز لک ایدیم حقه بر ایدیکه ' مشو ایدیک  
 صوبیمیز احضار ایدیمک حقدیمزده نه لر سیریمکی ایدیمیز  
 دیماله ' قلمیز ' ایدیمیزده گوره حرکت ایدیمز ؛ حکمت  
 سادیمز که ایچیم گوزل بر محافات حاضر لاندیمه فاضل اولور  
 سکریم بولیمیزدن شایریمیز ... اوت ' شومکست و عطا لقه  
 لقا حقیقی حاضریمزده ایزده بر فایم ده شومده و غیره قلمیز ؛  
 یا هوز ناوب اولیمز ' نلیم گیمیز ؛ نه قرار ویر سزیمز  
 لک ؛ اولر دنا اولر سزیم فایم نلک حیا کیمزده اوتفا  
 ده ایدیمز که یوزیمه صفای اولر لک ' یاریمیز لک اولریم  
 حکیمه ؛ بولیم با کلمه و ویر و آکلم سیریمزده گوره نه سزیم ؛
