# Supplementary material
Source: Research Square preprint supplement (doi:10.21203/rs.3.rs-9653111/v1)
Supplement: Supplementary file 3 [file Meşveret\1367_a020.pdf › Primary Sources/Meşveret\1367_a020.pdf]

REDACTION

48, Rue Monge, 48

PARIS

## MECHVERET

Organe de la Jeune Turquie

PUBLIÉ SOUS LA DIRECTION DE Ahmed RIZA

PARAISANT 2 FOIS PAR MOIS

Prix du Numéro

10 CENTIMES

« Ordre et Progrès »

## SECOND APPEL AUX CABINETS EUROPÉENS

ET AUX NATIONS ÉTRANGÈRES

Le parti de la *Jeune Turquie*, composé de membres appartenant à toutes les confessions de l'Empire ottoman, profondément ému des massacres de Constantinople et répudiant toute solidarité morale avec les autorités qui les ont ordonnés, proteste avec la plus vive indignation et avec la dernière énergie contre de pareils actes de barbarie.

Aujourd'hui que les ambassadeurs des puissances eux-mêmes ont fait la lumière sur ces événements et établi les responsabilités, on peut affirmer, à la honte de nos gouvernants, que ces massacres furent des *crimes officiels*.

Notre sentiment national, à nous musulmans, israélites et chrétiens, s'est indigné à la première heure, et la conduite infâme de l'Empereur qui siège sur le trône d'Osman, en nous blessant dans notre dignité humaine, nous a humiliés jusque dans notre patriotisme.

Mais le crime d'un monarque n'est pas imputable à la nation, et le nôtre, d'ailleurs, a brisé lui-même tous les liens qui l'unissaient à elle depuis le jour où il a conspiré contre elle.

Désormais, le pacte d'alliance est rompu entre le peuple ottoman et son souverain, et nous attendons, non pas d'une révolution intérieure où des vies humaines seraient encore sacrifiées, mais de la justice de l'Europe, la dissolution pacifique de ce pacte devenu intolérable.

Longtemps restés sourds à nos cris de détresse, trompés par les manières insinuantes et hypocrites d'Abdul-Hamid, les cabinets européens n'ont vu dans l'opposition que nous avons faite au Sultan qu'une guerre de parti.

Les événements n'ont cependant que trop donné raison à nos plaintes, et si, dans l'effroyable crime qui a souillé notre pays et l'honneur de toute une race, quelque chose peut consoler, c'est de voir enfin l'Europe, revenue à l'évidence par la brutalité des faits, reconnaître et notre bonne foi et la culpabilité de celui que M. Gladstone vient de stigmatiser pour l'histoire du titre de « Grand Assassin ».

Puisqu'aujourd'hui la vérité luit aux yeux de tous, et qu'il faut à tout prix se rendre à l'évidence, sous peine de devenir complice inconscient, quel remède propose-t-on pour fermer les blessures et cicatriser les plaies?

Par une involontaire mais bien malheureuse confusion l'Europe semble attribuer à l'esprit religieux un événement d'ordre exclusivement politique. Et alors, mue par un esprit de solidarité qui serait justifié si la cause de ses résolutions n'était pas entachée d'erreur, elle demande pour les Arméniens et pour les Crétois des constitutions et un régime particuliers, alors que, mieux informée, elle ne manquerait pas de s'intéresser également au sort des Musulmans abandonnés à la merci d'un tyran, en faveur desquels pas une voix ne s'est élevée dans le monde civilisé.

Notre comité a toujours manifesté des répugnances à l'égard des classifications et des catégories, et ses membres chrétiens, plus encore que ses membres musulmans, déplorent à l'avance l'injustice que commettrait l'Europe en manifestant toute sa sollicitude pour une fraction de la Turquie, oubliant que les Musulmans, plus nombreux que les Chrétiens et aussi malheureux, resteront livrés au caprice d'un homme qui se vengerait d'une

diminution de sa puissance par un redoublement de cruauté contre la fraction laissée en gage à ses ressentiments.

Pour nous, qui avons, dès l'origine, réclamé des réformes générales s'étendant à tout l'Empire, nous persistons à croire que le salut réside dans cette Constitution promulguée par Abdul-Hamid lui-même, mais *suspendue* depuis dix-huit ans. Cette Constitution limite, en droit, comme il l'était déjà en fait, l'absolutisme du Sultan. Elle assure la participation du pays à la confection des lois; elle accorde une liberté modérée, mais suffisante, de la presse, et réserve à la représentation nationale le droit d'entendre les ministres et de discuter le budget.

C'est dans l'application de cette Constitution que réside le gage de la sécurité future de la Turquie et partant de celle de l'Europe.

Quoi qu'il en soit, un fait aujourd'hui indéniable est que le Sultan, contrairement aux lois et au Chéri, rejetant le concours de ses ministres, a concentré entre ses mains tous les pouvoirs; que les actes de son gouvernement n'ont point justifié ni légitimé ses ambitions, qu'ils ont, au contraire, créé un nouveau péril à l'Europe en l'exposant au danger incessant d'une guerre générale.

Donc, à notre sentiment, le salut du pays réside uniquement dans le retour au gouvernement des ministres et dans l'exercice de la Constitution.

Nous espérons que la bonne foi de l'Europe, désireuse de prévenir de nouveaux malheurs, saura se rendre enfin à notre appel dicté par un esprit d'humanité et de civilisation.

LE COMITÉ.

## La visite de S. A. la princesse Nazli au Comité

Son Altesse la princesse Nazli, de passage à Paris, ayant très gracieusement exprimé le désir d'assister aux délibérations de notre Comité à Paris, le président, Ahmed Riza bey, a bien voulu convoquer immédiatement les membres. La séance a duré trois heures, et Son Altesse la princesse, ainsi que Son Excellence Vassif Efendi, secrétaire et conseiller de feu Midhat pacha, ont honoré de leur présence la réunion.

La princesse Nazli est la fille de feu Fazil pacha, du grand homme d'Etat qui, en Turquie, contribua largement à la diffusion de l'instruction, au développement des idées libérales en envoyant à Paris et à Londres, soit des étudiants, soit des administrateurs et des poètes tels que l'illustre Kémal, et en créant le parti de la Jeune-Turquie dont nous sommes aujourd'hui si fiers de porter le nom. D'une érudition extraordinaire, Fazil pacha tenait sa bourse à la disposition de ceux qui voulaient s'instruire, des sociétés de secours, des fondations pieuses et scolaires. Il a bien mérité de la patrie et de la religion et son nom restera à la postérité.

La princesse Nazli a hérité des éminentes qualités de son père. Très affable, très complaisante, d'un caractère charmant, d'une générosité exceptionnelle et d'une instruction vaste et solide, il est impossible de ne pas être séduit par son esprit, par la largeur de ses vues, par sa facile élocution. Parlant, outre le turc et l'arabe, l'anglais et le français sans aucune pointe d'accent étranger, Son Altesse est avant tout un diplomate émérite. On



croira peut-être que j'exagère. Je ne dis cependant que la vérité, la vraie vérité, et ceux qui ont eu l'honneur de causer avec Elle sont certainement de mon avis. Au courant de tous les incidents diplomatiques, liseuse infatigable, la princesse vient tous les ans en Europe. Je suis depuis longtemps à Paris, mais j'ai très rarement vu une personne du beau sexe ayant cette remarquable intelligence que l'atavisme et l'hérédité peuvent seuls expliquer.

Que Son Altesse me pardonne cette grande indiscretion que sa superbe modestie m'avait interdit de commettre. Ce qui prouve que la femme musulmane n'est pas, comme se l'imaginent les Occidentaux, un être inférieur et illogique.

A la fin de la séance, Son Excellence Vassif Efendi a bien voulu nous encourager par le discours suivant :

« Je suis tout heureux, Messieurs, de me trouver dans cette réunion composée de jeunes compatriotes, espoir de l'Empire. — Et je suis tellement ému qu'il m'est difficile de vous exprimer combien mon cœur est touché en vous voyant tous ici, sacrifiés par amour de la Patrie et de la Liberté ; — la « Liberté » peut seul inspirer tant de sacrifices, d'abnégation et de courage.

« Nous sommes tous réunis ici par le cœur, par la pensée et par la franche et loyale idée de chercher un moyen pour combattre, non seulement l'ennemi, mais l'opresseur de nos compatriotes et assurer le bonheur de notre cher pays... Faibles, mais unis, nous combattons jusqu'à l'épuisement de nos forces, et si nos efforts n'aboutissent pas au but, qui est celui d'assurer la liberté de nos concitoyens et le relèvement de l'Empire, nous aurons au moins la consolation de dire que nous avons fait notre devoir jusqu'au bout, espérant qu'après nous d'autres suivront notre exemple.

« Cette force, que nous devons puiser dans l'Union, peut et doit nous stimuler à persévérer dans la voie que nous nous sommes tracée.

« Pour définir le but de nos efforts, nous ne craignons pas d'arborer ouvertement notre drapeau, devant Dieu et devant le monde entier, car c'est le plus noble, le plus sacré des biens et des droits que nous réclamons pour les Ottomans ; ce but, Messieurs, consiste dans un mot qui trace tout le programme de notre conduite, ce mot, dis-je, qui fait trembler nos gouvernants rien qu'à l'entendre prononcer, et que vous tous avez déjà deviné, c'est la « Constitution » — qu'un de nos grands hommes d'Etat a su nous faire octroyer, au prix de sa vie. Oui, la Charte qui nous a été donnée, nous la réclamons à hauts cris, elle est notre droit, elle est notre bien, elle nous appartient, et aujourd'hui, Messieurs, tous nos efforts doivent pousser tous nos compatriotes à vouloir son exécution, à demander même aux Puissances leur appui dans ce seul et unique but.

« Nous ne sommes pas les champions de la révolution, nous blâmons les désordres, les soulèvements, les émeutes, les révolutions, les meurtres, les assassinats, que nos ennemis cherchent à nous attribuer pour nous montrer aux yeux de l'Europe et de nos compatriotes comme une poignée d'anarchistes ou de perturbateurs de l'ordre public ; nous sommes tout au contraire des gens qui réclament par les moyens les plus pacifiques et les plus nobles, nos droits et le bonheur de l'Empire, et nous sommes persuadés que l'appui même des Puissances ne peut nous faire défaut devant nos récriminations et nos demandes si justifiées par les faits. — Les Ambassadeurs de ces mêmes grandes puissances ont récemment encore constaté officiellement l'intensité de nos souffrances et la manière barbare dont nous sommes gouvernés.

« Nous demandons enfin une ère de liberté relative et compatible avec nos mœurs, pour nous unir tous sous un Gouvernement constitutionnel, basé sur les principes de l'équité, de la justice et de la garantie de notre vie et de nos biens.

« Voilà, Messieurs, ce que je tenais à vous dire, et maintenant en vous priant de faire écho à mon cri de : Vive la Constitution, saluons l'inspirateur premier de ces grands principes, le Grand Midhat.

« Je vous remercie de l'attention bienveillante que vous avez bien voulu m'accorder et je demande toute votre indulgence pour la manière un peu décousue dont j'ai présenté ces quelques idées ».

Nous sommes également très heureux et très honoré, Excellence, de vous voir parmi nous, travaillant avec nous, nous secondant dans la lourde tâche que nous avons assumée pour secouer le joug du despotisme et pour amener le règne de la justice, de la paix et de la liberté. Nous sommes d'autant plus touchés que vous avez été le secrétaire et le conseiller intime de Celui que nous pleurons toujours, du père de la Constitution ottomane et que cette intimité avec le Grand Midhat, vous a heureusement fermé les portes du gouvernement pourri d'Abdul-Hamid. Votre nom est resté intact des souillures dont sont couverts les vils serviteurs du Yildiz et il brille du même éclat que par le passé. En venant spontanément à nous, vous avez prouvé, comme vous le dites si bien dans votre discours, que c'est dans l'Union que nous devons chercher la force nécessaire pour obtenir gain de cause et pour faire comprendre à l'Europe que nos réclamations sont basées sur la légalité. Les moyens violents, quoi qu'en disent certains jeunes magnifiques, nous inspirent de l'horreur, parce qu'ils font plus du mal que de bien et que l'efficacité est plus que douteuse. Nous sommes partisans décidés de l'évolution et sans perdre courage, sans défaillance nous suivrons la route sûre. Nous hâterons l'évolution, nous lui donnerons une impulsion plus grande, mais nous ne ferons pas de révolution pour des raisons qu'il serait très long d'exposer ici. On nous montre la Grande Révolution française comme exemple sans prendre en considération les mœurs, les traditions de notre pays, le tempérament, le caractère de la nation et surtout la situation diplomatique de l'Etat, de cette situation qui permet, si elle ne les justifie pas, toutes les immixtions, toutes les interventions des Puissances étrangères, de « cet Etat qui fait, selon lord Russel (2 septembre 1876) exception à toutes les règles diplomatiques gouvernant les relations des Puissances entre elles ».

« Vous voyez le résultat de vos bonnes paroles ; votre voix a-t-elle trouvé un écho chez ceux à qui elles s'adressaient ? » disent d'autres têtes légères. Certes, nous voyons le résultat et nous nous en flattons, nous nous en réjouissons, car il est palpable, si j'ose m'exprimer ainsi ; il y a à peine un an la Jeune Turquie était complètement oubliée, faute d'organe pour prouver sa vitalité. Aujourd'hui le comité a pris une importance et une extension telles qu'Abdul-Hamid traite avec lui de puissance à puissance. Ce sont les bonnes paroles contenues dans cette feuille qui révèlent à la malheureuse population ignorante, les intrigues ignobles de l'imposteur Hamid et c'est leur influence salutaire qui récemment encore a fait dire au noble sofia qui avait caché chez lui des Arméniens traqués par les agents du Sultan : « le Chéri m'ordonne de les protéger ces malheureux, vous ne pénétrerez pas dans ma demeure sans passer sur mon corps. » C'est le comité encore qui par l'intermédiaire de ses agents délivre des infectes prisons où ils sont entassés dans l'angoissante attente de l'exil ou de la mort, les grands cœurs qui battent pour la liberté...

Mais qu'importent les critiques faciles et irréfléchies de quelques nerveux. Nous nous sommes tracé une voie, nous sommes convaincus qu'elle est la meilleure ; nous la suivrons jusqu'au bout, patiemment, obstinément, malgré tout ce qu'Abdul-Hamid pourra imaginer pour enrayer le mouvement, malgré les railleries de ceux qui ne voient que le but sans connaître les moyens pour y arriver ou de ceux qui veulent que les cailloux tombent toutes rôties dans leurs bouches.

FUAD.



# Un Recours à la Conscience publique

## Etrange responsabilité

Maintenant que la lumière commence à luire, parlons sincèrement, s'il est permis.

Le Sultan règne, l'Europe gouverne, le monde souffre, les Ottomans pâtissent.

C'est dans les victimes de ce *gouvernement* des Puissances qu'on veut voir les fauteurs responsables de tous les mécomptes. Tentons donc d'être logiques.

## Le Mois de miel

Ce gouvernement de l'Europe subsiste déjà depuis plus de quarante ans. La première moitié était en apparence « un mois de miel ».

La Turquie, traitée en enfant prodigue, dépensait à son aise les millions qu'elle recevait, excusée dans ses fautes et même dans ses erreurs, témoin les emprunts chroniques contractés pour payer les intérêts de sa dette.

On applaudissait à ses pseudo-fondations d'Universités, d'Académies, de Cour des Comptes, quand il n'existait point encore d'écoles primaires, de comptabilité régulière, en un mot nul principe scolaire, ni financier.

Cet état de choses, en apparence normal, était entièrement miné par des éléments destructeurs ; on l'avait sauvée de la conquête Moscovite, on ne savait pourquoi, car on lui refusait les conditions essentielles de sa vie sociale et économique.

Des traités, des conventions, des privilèges obtenus, étouffaient son industrie, détruisaient son commerce, compromettaient son avenir.

Les emprunts dont les taux d'émission atteignaient parfois jusqu'à 45 o/o furent même sujets à caution au point de vue de la sincérité.

Au moins, les apparences étaient-elles sauvegardées. On continuait à applaudir aux prétendus progrès réalisés sous l'auspice de l'Occident. On en paraissait fier, et pourtant Ignatieff seul se réjouissait avec raison.

## La Turquie est abandonnée par l'Europe

La suspension des paiements conseillée par Ignatieff, la Banqueroute financière préparée par ses amis surviennent et *coïncident* avec le soulèvement de tous les orthodoxes des Balkans. L'Europe s'ébranle, simulant l'ignorance de ce cas *imprévu*.

Des patriotes comme Midhat, pressentant le danger que court leur pays, accomplissent un acte suprême ; ils déposent le Sultan, promulguent la Constitution basée sur les principes de la civilisation, avec égalité parfaite entre les Ottomans.

L'Europe, cette Europe bienveillante qui applaudissait jadis aux caprices les plus futiles, reste sourde et impassible.

La Turquie délaissée par ses *protecteurs*, va devenir la proie du voisin qui la convoite depuis longtemps. C'est en vain qu'elle aura fait preuve d'une vitalité surprenante et d'une vaillance héroïque pendant cette lutte inégale et désespérée.

## Effets de l'appétit

L'Europe reste dans son impassibilité. Mais dès que les conditions imposées par le *Mandataire* à San-Stéfano sont publiées, tout le monde s'ébranle : une foule d'appétits à satisfaire, ou d'équilibres à conserver surgissent *inopinément*.

Nous voici à Berlin. On dépouille la Turquie, un peu la Russie pour doter l'Autriche-Hongrie, ou l'Angleterre, on fait des promesses à la Grèce et l'on donne... des espérances aux Arméniens. Seuls, les Turcs, les plus malheureux de tous, sont oubliés, puisqu'on laisse la source du mal séculaire d'Orient continuer son œuvre destructive.

## Un espoir déçu

Pourtant on connaît la source du mal et ses effets. Personne ne s'y intéresse.

Midhat, homme de valeur et d'expérience, le même qui en qualité de gouverneur du Danube (Bulgarie), celui de Bagdad, avait accompli des merveilles, lui qui avait étudié le pays mieux que personne, essaya de le sauver.

Un seul moyen lui semblait possible : Une constitution sous la garantie déguisée de l'Europe. Au prix d'efforts surhumains, il parvint à l'obtenir de celui qu'il voulait désarmer.

« Au fond du caractère turc, disait-il, existe une dose de bon sens ; le Parlement qu'on ne veut pas prendre au sérieux, vous ménagera, vous le verrez, des surprises. N'en fût-il pas ainsi, le Parlement nous procurera des gages précieux : 1° Il sera dans tous les cas, une cuirasse préservant la Porte des coups fatals du Palais Impérial. 2° Il deviendra une inappréciable source d'informations pour les affaires des provinces, toujours plongées dans les ténèbres par l'omnipotence arbitraire des gouverneurs généraux... »

Midhat avait usé de toute son influence pour faire promulguer la Constitution avant l'ouverture de la conférence de Constantinople, à laquelle il la communiqua officiellement.

Il se flattait de l'espoir que les plénipotentiaires de l'Europe auraient assez de sagesse pour *prendre acte* de la communication.

Cette *notification officielle* devait être la *seule garantie* sérieuse contre les empiètements futurs du Palais Impérial, ou contre le zèle complaisant des Mahmoud Nedim de l'avenir.

Les plénipotentiaires de l'Europe, y compris ceux de l'Angleterre et de la France, qui sauvèrent jadis la Turquie, répondirent, aux applaudissements du Général Ignatieff, par une fin de non recevoir mémorable.

## Un défaut de l'Occident

Aussi aujourd'hui, les diplomates, les journalistes, voire même les simples particuliers, ont-ils une tendance à traiter d'utopie dangereuse le parlementarisme en Orient, au mépris des principes fondamentaux du Coran basés sur le régime de *Consultation*.

Le plus fâcheux c'est que parmi les critiques de l'œuvre de Midhat, la plupart, hélas, n'ont jamais mis les pieds sur le sol de la Turquie !

On prétend l'Europe attentive à tous les événements d'Orient ! Est-ce vrai ?

Le parlement Ottoman, qui avait fort bien débuté en mettant sans coup férir les coupables au pied du mur, était dissous arbitrairement. Son infortuné promoteur d'abord exilé, était lâchement étranglé à Taif, ainsi que certains de ses partisans.

L'Europe, si attentive quand il est question des *insurgés contre le pouvoir légitime*, affecta de ne rien savoir.

Le règne du Sultan Hamid avait mis clairement en relief la source du mal de l'Orient. L'Europe ne s'en soucia pas plus. Des publicistes, des correspondants, des diplomates, aiment à *étudier* et à discuter des affaires d'Orient.

On interroge les Grecs, les Arméniens, les Juifs même, sur une foule de questions concernant le pays, sauf sur les moyens de la consolidation de l'Empire par l'accord de ses propres éléments.

## Deux sortes de fanatismes

Jamais on n'interroge les Turcs. Ils sont d'avance, comme leur empire, condamnés à disparaître, et l'on semble se complaire à prouver gratuitement leur incapacité à se conformer aux principes de la civilisation.

« Ils sont trop fanatiques pour notre époque », ose-t-on dire !

Et ces soi-disant libéraux qui s'expriment ainsi oublient complètement (ou peut-être ne l'ont-ils jamais su), que le Turc est le seul peuple qui ait eu la vertu de conserver pendant six siècles autant de races que de religions.

Lorsque Ferdinand et Isabelle, manquant à leur parole royale, commettaient des atrocités en Andalousie, la puissance Ottomane était dans la fleur de sa force ascendante. Elle avait pour sujets des millions de chrétiens de différents rites, et n'avait pas songé à de sanglantes représailles ; elle s'était contentée d'envoyer sur les côtes espagnoles des navires ayant pour mission de recueillir les fugitifs, musulmans ou israélites.



Les journaux parlent à tort et à travers, embrouillant les faits sans les expliquer, loin de les éclairer. Leurs imputations aussi déplacées que malveillantes contre les hommes et les choses de l'Empire ne font, hélas, qu'augmenter les ténèbres et obscurcir la vérité.

Présentez-vous humblement avec une rectification des plus inoffensives et des plus positives, croyant les servir en leur apportant la lumière. Ils ne tiennent aucun compte de votre démarche plutôt encore humanitaire que politique, par la seule raison que vous êtes... Turc.

Dans ce siècle de liberté, dans ce pays si généreux qui a donné même son sang pour nous, les règles générales de l'Occident seraient-elles particulières aux seuls chrétiens, aux seuls Occidentaux ? je ne puis, nous ne pouvons le croire !

### Une Industrie dangereuse

Avidité générale pour les décorations, l'argent, les chevaux, les brillants du despote fait commettre aux gens des énormités surprenantes.

Les feuilles largement stipendiées n'ignorent pas qu'au milieu du mois de septembre, les mensualités d'Avril des employés d'Etat ne sont pas encore réglées. Mais comme lesdites feuilles sont bien et régulièrement payées à la seule condition de taire les vérités désagréables au despote, elles n'ont aucun scrupule de crier à gorge déployée :

« Qu'il est triste de voir les Turcs inaccessibles à toute civilisation. Avec un prince aussi studieux, aussi libéral, aux idées si larges et si grandes, à quoi n'atteindraient-ils pas dans les voies du progrès ? »

Et cependant ces journalistes ont conscience de calomnier indignement un peuple martyr et sympathique.

Ils ont également conscience que la seule cause de l'anarchie destructive de la Turquie est l'objet de leur adulation criminelle.

Vous entendez à chaque reprise des conseils le projet d'ériger des autonomies en faveur des chrétiens, mais vous n'entendez jamais parler de l'hypothèse d'améliorer le régime de l'Empire, ni de réformer la puissance ottomane en détruisant les causes de son mal, ce qui serait plus noble, plus facile et assurément plus naturel.

On n'avait pas relevé les crimes dont feu Stambouloff était l'auteur et dont il devait être la victime. On ne réfléchit pas plus que si ces crimes eussent été commis sous la domination ottomane, l'Europe entière se serait soulevée.

Après tant de démembrements maladroits, on est parvenu à obtenir des privilèges spéciaux pour six provinces de l'Asie-Mineure ; on sait bien que cette atteinte portée au cœur même de la Turquie n'est qu'un prélude à une séparation prochaine.

Or, cette séparation sera une énormité politique et ethnographique, puisqu'il n'existe aucune majorité anti-turque, ou anti-islamique. La coupable insouciance de la diplomatie est couronnée par la criminelle ineptie du Yildiz, qui l'accepta pour lesdites provinces *seules*, et non, au moins, pour tout l'Empire.

D'ailleurs, c'est cette stupidité ignorante du Palais qui sert toujours, plus ou moins, aux opérations ingénieuses de la diplomatie européenne.

### Les Causes.

Mais enfin, pourquoi ce parti-pris si malveillant, pourquoi cette indifférence si scandaleuse ? La réponse en est simple : L'Europe n'a aucun souci de voir la Turquie sauvée de son mal séculaire !

Par instinct héréditaire du temps des croisades, elle est disposée, peut-être malgré elle, à la chute de l'Empire ottoman.

Mais aucune des puissances ne se croit encore prête au démembrement radical qu'elle convoite.

D'autre part, leurs appétits réveillés, les empêchent de vouloir une solution définitive en faveur des Turcs, les vrais propriétaires.

### Conclusion

Tel est le cercle vicieux dans lequel tourne la question d'Orient sans trouver d'issue.

Des milliers d'êtres humains en souffrent cruellement. Des massacres épouvantables réveillent de temps en temps les sentiments du monde civilisé.

On connaît le mal, on sait aussi le moyen d'y remédier. Cependant personne ne veut le tenter.

Certaines puissances ont besoin d'une Turquie chancelante. Elles sont servies à souhait, le Yildiz est sans doute leur meilleur allié, et malheur à ceux qui songeraient à débarrasser la Turquie et le monde de ce nouveau fléau, scandale de l'humanité entière.

On n'a aucun scrupule d'accuser un peuple martyr, victime de cette politique criminelle ; peuple innocent dont l'unique défaut réside dans l'aveugle obéissance aux autorités légitimes.

On récrimine ouvertement contre le prétendu « Grand assassin », qui, tout en assumant la responsabilité de tant de forfaits, n'est, en réalité, qu'une *persona gratissima* de certaines chancelleries.

Pas un seul mot sur ses instigateurs dont la responsabilité émotionnerait et terrifierait tous les nobles cœurs si on avait conscience de la vérité tout entière.

### Suprême prière

Au nom de la Tolérance Divine, assez de croisades !

Au nom de la justice suprême, un peu d'impartialité !

Il faut songer au jugement que l'histoire ne manquera pas de rendre.

Il faut écarter les innocents entraînés forcément parmi les coupables.

Il faut punir, et punir sévèrement les méchants responsables, mais pas des malheureux déjà accablés par des souffrances atroces que le monde n'avait jamais rencontrées...

MOURAD.

## QUATRIÈME LETTRE OUVERTE

ADRESSÉE A S. M. LE SULTAN

Sire,

Lorsque je vous écrivais, il y a quinze jours, que « à mon sentiment, c'est dans votre propre Palais qu'il faut rechercher les organisateurs des troubles de l'Empire », j'étais bien loin de voir confirmer mon dire, à bref délai, par une enquête officielle des représentants des six grandes puissances ! La note remise par les ambassadeurs dit textuellement : « qu'il reste constaté que des bandes d'hommes armés de matraques étaient dirigées par la police... que ces bandes étaient dans les mains des autorités... et que les représentants des six puissances ne poursuivront plus la discussion sur des faits aujourd'hui parfaitement établis. »

Ceux qui ignorent votre système de gouvernement et vos principes puisés dans le Machiavel de la légende — car celui de l'histoire vaut mieux que sa réputation, — rejetant d'abord la pensée qu'un souverain, c'est-à-dire un père, soit à tel point frappé de démence qu'il organise lui-même les complots contre ses sujets, qu'il conçoive le monstrueux dessein de conspirer contre ses propres enfants, ceux-là n'ont pas dû être médiocrement surpris de l'éclatante et universelle confirmation donnée à cet insigne fait par les six grandes puissances ! Objecterez-vous que l'Europe vous est systématiquement hostile et que l'on ne peut être juge et partie ? Sans compter que vous étiez personnellement représenté dans la commission d'enquête par votre grande amie, celle que l'on ne doit pas nommer, celle en faveur de qui vous avez aliéné, avec la liberté d'action de votre gouvernement, l'indépendance de la Turquie, et qui, en échange, vous a garanti la vie sauve — rien de plus — votre vie à vous seulement. — Après moi le déluge, n'est-ce pas, Sire ? — Si le jugement des



puissances avait été dicté par un esprit d'hostilité, elles auraient donné immédiatement une sanction efficace à ce jugement en bombardant votre capitale, ainsi que l'a proposé l'Angleterre, dont seul vous avez à suspecter la bonne foi. S'il était vrai que, à la faveur de ce jugement, l'Europe poursuivît votre déchéance, l'occasion lui était propice ou jamais, grâce à cette unanimité des voix, à cet accord rare qui s'est fait à ce propos entre les puissances toujours désunies. Et chose remarquable, cette entente européenne, que les diplomates recherchent vainement et qu'ils ne sont jamais parvenus à établir en aucun temps, en aucune circonstance de l'histoire, ils l'ont enfin trouvée une fois, — et c'est pour vous condamner ! Triste constatation.

Quel heureux hasard, quel favorable sort maintient encore sur votre tête, malgré cette éclatante condamnation, la chancelante couronne des khalifes, nul ne l'expliquera jamais. Ou plutôt, pour que l'Europe, qui a reconnu votre culpabilité, vous laisse impuni, n'est-il pas flagrant, à voir ses reculs et ses capitulations de conscience, qu'elle subordonne à la paix les intérêts de la civilisation et de l'humanité ?

Cela étant, Sire, vous auriez mauvaise grâce à vous arrêter dans la voie qui vous a si délibérément mené au triomphe. Du fond de votre Yildiz, Louis XI astucieux, vous avez mis en échec les plus fins diplomates de l'Europe. Lutteur désormais célèbre, vantez-vous d'avoir *tombé* ministres et ambassadeurs ; faites inscrire ce haut fait dans les annales de l'Empire Ottoman. Ceci n'est pas de l'ironie, c'est la sincère expression de ma pensée : Oui, l'Europe a capitulé devant vous, l'Europe est prisonnière de Votre Majesté. Vous avez enfin mérité et justifié ce titre d'*El Ghazi*, le Victorieux, que des flatteurs de cour vous ont si prématurément octroyé au début de votre règne, après le démembrement de votre empire par les Russes. Et maintenant, la voie vous est ouverte ; licence vous est donnée de massacrer. Usez-en, Sire, et ne vous détournez plus pour entendre les protestations de quelques imbéciles d'honnêtes gens qui ne comprennent rien aux nécessités de la politique. Abusez-en, Sire, vous dis-je, l'Europe est votre prisonnière, l'Europe est votre vassale, l'Europe, humblement s'incline aux pieds de Votre Très Auguste Majesté. Sire, Vous êtes le CALIFE ; rien au-dessus de Vous sinon Dieu — qui vous jugera. Massacrez, Sire, c'est votre droit. Défendez-vous contre vos ennemis personnels — ne sont-ils pas les ennemis du pays ? Tous les moyens sont bons quand le repos et la vie de Votre Majesté, notre père, sont en jeu. Que votre police si admirablement organisée découvre chaque jour les 500 bombes de dynamite qu'elle a fabriquées et si nécessaires à la poursuite de vos vastes desseins ; et qu'elle arrête les Arméniens dans les maisons desquels elle les a habilement glissées. Mais ceux-ci ne sont pas vos pires ennemis. Vos pires ennemis, ne sont pas les chrétiens ; ce sont les musulmans, Sire, ce sont les Jeunes Turcs, — jeunes ou vieux — qui osent se plaindre que Votre Majesté ait enlevé à la Turquie les quelques libertés essentielles à l'homme pour vivre. Ceux-là sont des fous dangereux, Sire. Les Républiques ont toujours péri par les excès où la liberté les a conduites. Or, tout ce qui peut donner lieu à un abus, la vertu même, si elle est dans ce cas, est condamnable. Votre favori, Izzet bey, ne vous répète-t-il pas chaque jour, comme un acte de foi, que les Turcs ne méritent pas de sortir de l'esclavage, qu'ils ne sont pas mûrs pour la civilisation ? Ecoutez, Sire, les conseils de votre favori d'aujourd'hui — qui ne sera pas celui de demain — et, à la faveur des complots anarchistes, faites arrêter dans tout l'Empire, les musulmans qui osent parler de réformes. L'Europe ne s'intéresse pas aux musulmans ; vous pourrez les exiler, les faire déporter en masse, les noyer dans le Bosphore avec la nuit pour complice : l'Europe ne se rappelle qu'il existe des musulmans que pour les confondre avec les kurdes de votre « Hamidiéh ». Poursuivez le parti de la Jeune Turquie, traquez-le, extirpez dans sa racine la graine qui féconde ; écrasez dans l'œuf, de votre main impériale la pensée qui germe et la conscience qui se réveille. Les musulmans vous appartenant corps et biens, ils sont taillables et corvéables à merci, consultez l'histoire de la féodalité ; ils sont votre

propriété, votre chose à vous, consultez vos flatteurs ; mais de grâce, ne consultez pas le Koran. Si des esprits chagrins objectent que vous vivez en Europe et que nous sommes au dix-neuvième siècle, au vingtième bientôt, répondez-leur que la Révolution française n'a pas été faite pour vous, que d'autres souverains, que des sultans même, vos prédécesseurs, ont pu avoir la faiblesse de se laisser prendre à son mirage, mais qu'il est nécessaire enfin de revenir aux bonnes traditions du vieux temps. Répondez-leur, Sire, que l'Europe elle-même reconnaissant ses erreurs d'un siècle, a rejeté loin de soi et mis au rancart, comme un habit démodé, ces choses qu'on dénomma pompeusement, cent ans durant, liberté, égalité, humanité, civilisation.

Dites-leur, Sire, que les peuples, n'ont inventé et conquis à prix de sang la liberté que pour la restituer humblement, à genoux, à ceux qui détiennent le pouvoir par la grâce de Dieu ; que cette spoliation volontaire est un hommage de plus rendu au Créateur et une reconnaissance formelle et explicite du droit divin des rois ; que l'égalité est une chimère, puisqu'en créant des rois, Dieu a établi lui-même l'inégalité parmi les hommes ; que l'humanité est un mot vide de sens lorsqu'il ne signifie pas l'ensemble des hommes ; enfin, que ceux qui ont dévasté l'Irlande, traqué les Juifs, mis les nègres au ban de la société, pour ne parler que de leurs derniers exploits, ont perdu toute espèce de droit et d'autorité à plaider pour leurs frères.

Quant à la civilisation... rappelez-leur, Sire, la prophétie de Napoléon : « D'ici cinquante ans, l'Europe sera ou républicaine ou cosaque ».

UN AMI DE LA TURQUIE.

## MONSIEUR GLADSTONE

Le « grand old man » vient de rompre le silence en venant à Liverpool, au milieu d'acclamations de ses admirateurs, dans un de ces meetings extraordinaires qu'on ne rencontre qu'en Angleterre, dans le but de manifester l'indignation publique contre les massacres d'Anatolie et de Constantinople. M. Gladstone a parlé une heure et quart. Je n'étudierai pas ici longuement son discours, puisque je trace ces lignes dans un tout autre ordre d'idées. Nul n'ignore que le grand orateur a eu longtemps la réputation d'être un turcophobe. Détester ou haïr une nation quelconque, une association d'êtres humains réunis par les mœurs, les traditions, la langue et l'histoire est un grand défaut et une injustice inqualifiable, voire même une bassesse d'âme pour les grands penseurs.

Du temps des atrocités bulgares, très-jeune encore, je m'étonnais qu'un champion de l'humanité souffrante comme Gladstone possédât des idées aussi erronées et des préventions aussi injustes, et je ne pouvais m'expliquer comment cet incomparable apôtre s'était formé d'aussi fausses notions sur le noble et généreux peuple turc qui fait l'admiration de tous ceux qui l'ont étudié de près. Je m'étonnais d'autant plus que par un phénomène inexplicable, lorsque j'étais élevé à Salata-Sérai, le nom du vénérable homme d'Etat prononcé pour la première fois devant moi par des camarades m'inspirait déjà une grande sympathie. Cependant, on ne cessait de me répéter qu'il était un ennemi décidé de ma nation ; mais ces affirmations puériles n'ont pu ébranler ma conviction qui se justifia grandement quand plus tard j'ai minutieusement étudié sa vie politique et ses luttes obstinées pour la liberté. A plusieurs reprises, au reste, M. Gladstone a, lui-même, démenti par ses lettres publiées ces faux bruits et ouvertement déclaré que sa haine s'adressait uniquement au mauvais gouvernement ottoman, cause de tant de calamités. Le vénérable vieillard a péremptoirement prouvé qu'il était, selon une belle expression du *Temps*, un de ces hommes qui font honneur à l'homme.

Dans le grand meeting de Liverpool, M. Gladstone a fait res-



sortir avec son coup d'œil d'aigle, que la tyrannie d'Abdul-Hamid faisait autant de victimes dans le camp des Musulmans que dans celui des Arméniens, et que les responsabilités de ces atrocités incombaient uniquement à leur unique auteur « le grand assassin ». « Les victimes, dit-il, qu'elles soient musulmanes, bouddhistes, hindouss ou arméniennes, ont droit à toute notre sympathie au nom de l'humanité ». Il ne voit donc dans ces massacres que l'exécution d'un ordre souverain.

Contrairement à ces grands hommes qui en dépassant la limite de l'âge diminuent de leur gloire, M. Gladstone vivant dans sa paisible retraite de Haweden a ajouté des siècles à sa vie ; son nom est sanctifié par les Ottomans pour l'acharnement qu'il a montré à traîner dans la boue un souverain qui ruine son pays et massacre les habitants.

Abdul-Hamid n'en déteste pas moins le grand homme qui l'a hardiment démasqué et qui continue à vouloir l'empêcher de verser le sang des innocents ; et prononcer le nom de M. Gladstone avec la moindre admiration, c'est encourir les pires châtiements du Tyran.

A ce propos, que l'on me permette de raconter ici une petite aventure qui m'est arrivée à Constantinople au début des massacres. Au mois de mai 1893, avant de partir pour les Etats-Unis, j'avais écrit une lettre à M. Gladstone sollicitant une audience dans le but de lui exposer de vive voix les souffrances qu'enduraient les musulmans et les chrétiens de la part du sultan et de le prier d'élever sa puissante voix en faveur de toutes les nations sans distinction de religion.

A mon retour à Constantinople, un an après, je fus fait prisonnier, à Yildiz-Kiosque, où dans le stupide interrogatoire que m'ont fait subir les ignares secrétaires de S. M., cette question revenait sans cesse : « Vous savez très bien que Gladstone est l'ennemi juré de notre grand Empereur, comment avez-vous osé, vous, serviteur du padichah, demander audience à ce méchant homme ? » Il y allait peut-être de ma vie, mais je répondis avec une franchise brutale : « Si Gladstone n'a pas beaucoup de sympathie pour S. M. Abdul-Hamid, c'est qu'il a ses raisons et les raisons qu'il a sont certainement plausibles, car ce grand homme est au-dessus des mesquines idées de partialité. » Je fus relaxé par miracle. Les événements, depuis trois ans, ont prouvé, hélas ! que l'animosité du grand ministre anglais était bien fondée. Il voyait clair dans ces affaires d'Orient et désignait très justement l'homme néfaste qui devait consommer la ruine de ce beau pays. Aujourd'hui, ce n'est pas M. Gladstone seul qui est l'ennemi d'Abdul-Hamid. Il a contre lui son peuple et l'Europe tout entière.

A. RÉCHID.

## LA FAMILLE IMPÉRIALE

A l'heure où toutes les familles souveraines de l'Europe sont en fête, où la République française elle-même prépare un accueil magnifique et cordial à l'empereur et à l'impératrice de Russie, il n'est pas sans intérêt de jeter un coup d'œil sur cette malheureuse famille d'Osman.

Tous ceux que n'aveuglent pas le fanatisme religieux ou politique reconnaissent sans peine qu'un grand nombre de Sultans de cette race se sont distingués par les immenses services qu'ils ont rendus à la Turquie. Quelques-uns même ont entretenu avec les souverains d'Occident des relations dont s'honore l'histoire de leur pays. On sait que Michelet a consacré tout un chapitre à démontrer que le Sultan Suleiman, par une intervention opportune « sauva l'Europe » menacée par ses guerres de religion. Qu'on relise nos capitulations avec les souverains européens et l'on verra qu'aucun autre monarque ne fut jamais traité avec autant d'égards et de considération que les Fatih, les Suleiman, les Sélim et les Mahmoud !

Il en est parmi nos Sultans, il est vrai, qui se sont montrés indignes et cruels ; mais quelle famille souveraine peut se vanter de ne présenter à l'histoire que des princes glorieux ?

Depuis quelques cent ans, grâce au régime représentatif et aux progrès de la civilisation, la chimère du droit divin des rois s'est évanoui et l'ère des despotes barbares paraît être close en Europe ; malheureusement elle ne semble pas l'être encore en Turquie dont le Sultan régnant vient d'être flétri d'un titre qui lui restera dans l'histoire.

Ce n'est pas à dire que nous ne conservions pour la famille d'Osman un attachement et une fidélité que les cruautés d'un Abdul-Hamid ne sauraient diminuer. Au contraire, ce despote nous fait reporter les yeux sur d'autres princes reliés par leurs sentiments élevés aux membres les plus illustres de la race d'Osman. Et ce nous est un devoir de faire constater à l'Europe entière, en ce moment où tout est à la joie, la triste condition à laquelle se trouvent réduits les princes Mourad et Réchad. Tous deux en prison, les fers aux pieds comme des forçats ; tous deux sont livrés aux caprices d'un frère soupçonneux qui châtie en eux leur qualité d'héritiers de la couronne. Et cependant, lorsque par la marche fatale des événements l'un d'eux sera bientôt appelé à succéder à son frère, brusquement du jour au lendemain, des chaînes brisées, il deviendra le *cousin* des souverains régnants. Eh bien ! nous le demandons avec amertume, n'est-il pas triste de constater que ces souverains qui négocieront un jour avec ces deux princes les affaires communes de l'Europe et les traiteront d'égal à égal, ne manifestent aujourd'hui pour leur malheur ni intérêt ni compassion.

Les princes héritiers ne sont pas les seuls membres de la famille impériale qu'Abdul-Hamid tient emprisonnés ; les autres princes avec leurs femmes et leurs enfants sont également claquemurés. Personne ne peut pénétrer chez eux. Le Sultan ne travaille pas seulement à la ruine de son empire, mais il paraît encore s'acharner à l'extermination de ses plus proches parents. A aucune époque la famille impériale n'a été aussi indignement maltraitée. Les jeunes princes étaient autrefois des Ulema (savants) qui dirigeaient leur éducation et qui, avant de chercher à guérir le peuple de ses vices et de ses préjugés, travaillaient à guérir ceux qui étaient destinés à le gouverner. Ces princes non-seulement étaient libres, mais ils occupaient dans les provinces des postes importants. Ils gagnaient ainsi par leur talent et leur conduite, l'estime et la vénération de leur entourage. Aujourd'hui, tenus à l'écart, privés de toute lumière et de toutes relations avec le dehors, ils sont traités comme les derniers des esclaves.

C'est ainsi qu'on sème la peur et l'ignorance dans le cœur de ceux qui sont appelés, comme Sultan et Calife, à faire vivre le peuple en paix et en sécurité.

Certes, le peuple Ottoman prend part à leur sort, mais quel moyen d'y apporter un changement sinon par une révolution ? Or, c'est juste parce qu'il redoute les conséquences de ce moyen extrême qu'il s'est résolu à ne rien dire et à attendre du temps une meilleure solution. Mais l'Europe ne devrait-elle pas lui tenir compte de ces sages résolutions qui garantissent la paix et s'intéresser, en retour, au sort de ces deux infortunés princes sur lesquels elle doit compter un jour pour relever l'Empire Ottoman qu'Abdul-Hamid entraîne à sa ruine ? Et, puisque les rois se considèrent comme cousins, n'est-ce pas aux souverains de l'Europe aujourd'hui en fête à penser à leurs cousins, à leurs frères captifs et malheureux, aux aïeux desquels ils demandaient jadis du secours ? Qu'ils exigent donc du Sultan actuel sinon leur libération complète, du moins un adoucissement à leurs souffrances, au nom des mœurs nouvelles que la civilisation a introduites dans les familles régnantes et au nom de la plus élémentaire humanité.

AHMED RIZA.



Dans le premier article du n° 18 (1<sup>er</sup> septembre) de votre estimable journal, se trouve un passage qui, bien que dû à une simple inadvertance et sans mauvaise foi, est pourtant de nature à induire en erreur quelques-uns de vos lecteurs sur la vraie tendance et la portée des querelles des nationalités en Hongrie.

Permettez-moi de vous dire qu'au point de vue de l'histoire vraie, il n'y a aucune assimilation possible entre la situation des Polonais dans l'empire russe, russifiés par les procédés qu'on sait, et les persécutions des Musulmans en Bulgarie et les agissements des nationalités de la Hongrie. Nos compatriotes serbes, croates et roumains, dont les doléances bruyantes alimentent certains organes de la presse européenne, ne sont nullement, comme chacun sait, une conquête récente de l'élément magyar, mais appartiennent à la couronne de Saint-Etienne presque depuis l'établissement du royaume de Hongrie. En outre, toutes les nationalités jouissent, dans ce pays, des mêmes libertés politiques, religieuses, etc., et, s'il y a des abus, toutes en souffrent également ou à peu près. La campagne de « revendications » de certains meneurs des nationalités procède bien plutôt d'un excès de liberté, et tend en somme, plus ou moins ouvertement, à la désagrégation de l'Etat hongrois. Reste à savoir ce qu'on mettrait à sa place, et si ce quelque chose remplirait aussi bien le rôle assez honorable qu'a rempli la Hongrie, selon les enseignements de l'histoire impartiale, pendant le moyen-âge et les temps modernes, parmi les peuples de l'Occident.

Agréez, Monsieur le rédacteur, l'assurance de ma parfaite considération.

S. KUN,

Président du Cercle positiviste  
de Budapest.

A M. AHMED RIZA, DIRECTEUR DU *Mechveret*.

Vous n'ignorez pas qu'à la rentrée des Chambres, le ministre des affaires étrangères sera interpellé par M. Denys Cochin, député de la Seine, ainsi que par Mgr d'Hulst, l'abbé Lemire et M. de Mun, au sujet des massacres de Constantinople. C'est au nom du christianisme que les représentants du clergé questionneront M. Honotaux : « Sur les mesures que le gouvernement français a prises ou compte prendre pour la protection des sujets chrétiens de l'Empire ottoman ».

Ne croyez-vous pas que l'honorable député de la Seine, M. Cochin, pourrait au nom de l'humanité plaider la cause de tous les sujets ottomans sans distinction de religion ? Certes les Arméniens ont plus que jamais droit aux sympathies et à la protection de l'Europe ; mais il n'y a pas que des Arméniens en Turquie, et ils ne sont pas les seules victimes du gouvernement tyrannique d'Abdul-Hamid. Les mahométans, les orthodoxes (grecs, etc.), les israélites souffrent aussi, et, par conséquent ont droit à ce que l'on améliore leur misérable situation.

En supposant que le ministre des affaires étrangères promette des mesures énergiques pour la protection des Arméniens, que la France, d'accord avec les puissances européennes, établisse dans l'Empire ottoman, ainsi qu'il en est question dans les cercles officiels viennois, un contrôle administratif, la situation des sujets ottomans s'améliorera-t-elle ? Le pays rentrera-t-il dans le calme ? Tous ceux qui connaissent la Turquie, autrement que par des relations de voyage, répondront négativement. Un palliatif de plus et voilà tout. La tutelle de l'Europe sera un affront pour tous les patriotes ottomans, elle ne fera qu'envenimer la situation et ne sera pas subie sans colères ni protestations.

La solution de ce triste état de choses, vous l'avez indiquée dans votre « Appel aux Cabinets européens », avec le pur patriotisme qui vous anime et fait honneur à notre malheureux pays où ne règnent aujourd'hui que le déshonneur et l'avilissement.

Le rétablissement de la constitution de Midhat et la déposition

du dégénéré Abdul-Hamid sont indispensables pour arrêter la chute fatale de l'Empire ottoman.

Ne pourriez-vous pas, Monsieur le directeur, au nom du « Comité ottoman d'Union et de progrès » et par l'organe du *Mechveret*, prier l'honorable député de la Seine, M. Cochin, de ne pas nous oublier dans son interpellation.

Outre la garantie du maintien de la paix en Europe, ce serait œuvre d'humanité, de concorde, de grandeur marquant dans l'Histoire, qu'entreprendrait M. Cochin, en soulevant à la Chambre la question de la Constitution ottomane.

Veuillez agréer, etc.

J. H.

Patriote ottoman,

## Assemblée protestante de Neuchâtel

EN FAVEUR DES ARMÉNIENS.

Nous avons parlé dans notre dernier numéro de l'Assemblée protestante de Lausanne. La *Suisse libérale* nous apprend qu'une assistance très nombreuse qui avait répondu à l'appel du Comité arménien garnissait au soir du 18 septembre les bancs du Temple-du-Bas, à Neuchâtel, pour attendre quatre orateurs se succédant à la tribune, parler de cette émouvante question arménienne, et que notre zélé compatriote arménien, M. Zeky Efendi Cantar y avait pris de nouveau la parole.

Nous extrayons de la *Suisse libérale* quelques passages de son discours :

« M. Zeky raconte ensuite la manière dont le sultan s'est débarrassé de ses hommes d'Etat et les misères qu'il fait aux Jeunes Turcs, le parti éclairé de l'élément musulman, les seuls qui désirent fraterniser avec les chrétiens de la Turquie. Il nous donne l'assurance que cette classe des Turcs est tout aussi molestée que les Arméniens, car, dit-il, depuis son avènement au trône, c'est-à-dire depuis vingt ans, Hamid en a exterminé environ 45,000 qui ont péri les uns dans les cachots de Yildiz et les autres noyés dans les eaux du Bosphore. A l'heure qu'il est on compte 10 à 12 mille Jeunes-Turcs, qui sont exilés à Bassrah, au Yémen, au Hedjaz et à Rhodes.

L'orateur passe ensuite au sort qui est fait aux Arméniens, dont les principales fautes sont au nombre de deux : ils ont sollicité la sécurité de leurs biens, de leurs existences ainsi que celles de leurs femmes et de leurs enfants. La seconde plus grave encore, est l'addition d'un article 61 au traité de Berlin, qui obligeait le Sultan à promettre des réformes aux Arméniens.

C'est le plus grand tort que les puissances aient pu leur faire. Car, dès ce jour, Hamid s'est mis en tête d'exterminer les Arméniens.

M. Zeky donne lecture d'un article paru dans le *Mechveret* d'Ahmed Riza bey, qui montre ce qu'est la fameuse garde prétoirienne, le régiment kurde connu sous le nom d'Hamidieh, entièrement dévoué au sultan et capable de toutes les besognes. »

Nous venons de publier une brochure en langue turque contenant 16 sentences ou préceptes dogmatiques (*felva*) tirés du Coran et des lois musulmanes, qui non-seulement condamnent les actes du Sultan Abdul-Hamid, mais ordonnent encore formellement de le déposer. Ceux des Musulmans qui ne veulent régler leur conduite que sur les préceptes des livres sacrés peuvent ainsi s'assurer du bien fondé de nos revendications. Nous en traduirons les principaux passages dans un de nos prochains



numéros ; les étrangers pourront se rendre compte à leur tour que la religion musulmane elle-même nous fait un impérieux devoir de blâmer la conduite de notre chef actuel et même de le déclarer déchu du trône, s'il s'obstine à rester sourd aux justes plaintes de ses sujets.

Le correspondant au *Times* de Constantinople nous apprend que le conseil des Ministres a longuement discuté les mesures à prendre pour arrêter le mouvement des partis qui demandent des réformes et des libertés.

D'après le correspondant anglais, la majorité du conseil craignant que la violence ne fit augmenter le mécontentement général, s'était tout d'abord prononcée pour l'adoption de mesures plus ou moins indulgentes, pouvant ramener dans la « bonne voie » par la douceur, les esprits surexcités. Mais le Cheik Islam et le Ministre de la marine, les deux principaux favoris du Sultan, s'inspirant sans doute des ordres de leur chef, ont été d'avis qu'il fallait agir avec la dernière rigueur contre tous les partis libéraux. Les autres Ministres, craignant sans doute qu'ils ne pussent être accusés à leur tour de protéger les mécontents, se sont finalement rendus à la manière de voir de leur tristes collègues : des mesures tyranniques ont donc été adoptées. Comme les membres de notre parti se trouvent inscrits sur la liste des « perturbateurs », nous devons nous attendre à ce qu'un beau matin nos camarades de Constantinople subissent le même sort que les Arméniens.

Les journaux d'Europe ne manqueront certainement pas de manifester aussitôt leur indignation et de nous témoigner toute leur sympathie. Ne vaudrait-il pas infiniment mieux le faire d'avance ?

Dans un article publié par la *Saint-James Gazette*, sir Ashmead Bartlett, membre du Parlement, proteste contre la frénésie d'une partie de la presse et du public britannique relativement à la Turquie.

Il rappelle que les conspirateurs arméniens ont été aidés par la plus méprisable classe de vagues correspondants de journaux et de non moins vagues agences anglaises. C'est, payés à beaux deniers comptants qu'ils ont provoqué les massacres.

Les Turcs ont toujours fait preuve de tolérance religieuse. Si, comme certaines nations, ils avaient exterminé les sectes dissidentes, ils n'auraient aujourd'hui ni la question d'Arménie ni celle de Crète.

Lord Salisbury doit revenir à une politique ferme, mais amicale, chrétienne et non fanatique. La paix du monde en dépend.

Le *Daily Telegraph*, revenant sur le discours de Liverpool, s'exprime en ces termes :

Si M. Gladstone avait poussé plus loin ses investigations, il aurait vu qu'il y a eu des tentatives faites en vue de protéger les Arméniens par certains musulmans. C'est que les musulmans

souffrent autant que les chrétiens de l'horrible système de gouvernement de l'empire ottoman.

Nous lisons dans le *Temps* d'hier la lettre suivante que son correspondant lui envoie de Constantinople :

Je vous ai signalé comme une contradiction flagrante avec les promesses d'apaisement répandues par le gouvernement turc, cette étrange exposition de bombes à laquelle toute la population est conviée. On a bâti pour l'abriter une sorte de chalet dans la grande cour de l'arsenal et la foule, pendant trois jours, n'a pas cessé de défiler devant des vitrines où un certain nombre d'engins destructeurs assez primitifs sont classés et étiquetés, comme de beaux fruits d'espallier à quelque concours agricole.

Le succès a été considérable. Une vraie curiosité s'est éveillée, pour la première fois peut-être, dans les masses musulmanes ; on est venu de partout, encouragé par des appels de tout genre et j'ai pu compter moi-même plus de cinq cents personnes dans une heure.

A quoi en veut-on venir par de tels procédés ? Car, s'il s'agissait de faire une « exposition nationale arménienne », il faudrait la faire plus complète et joindre à cette pyrotechnie rudimentaire quelques beaux produits du travail honnête de cette race que l'on persécute sans songer qu'elle est par son labeur incessant la fortune de l'empire. Est-ce consciemment que l'on a fait cette périlleuse démarche, de jeter dans l'imagination d'un peuple enfant l'effroi d'une destruction mystérieuse par des moyens qui doivent lui sembler plus démoniaques encore que scientifiques ? Veut-on provoquer encore une fois la réponse du bâton à la bombe et cette « légitime indignation de la populace » qui a servi d'excuses le mois dernier aux exploits de la police ?

Il faut se mettre en garde et se demander si l'action ne dément pas systématiquement la parole. Voici des petits faits qui donnent à réfléchir : Le rédacteur d'un journal turc paraissant à Philippopoli, l'*Emniet*, vient de recevoir une décoration. On apprend à cette occasion qu'il est à la dévotion de la Porte, dont les fonds soutiennent le journal depuis longtemps. Or, ce journal, très répandu à Constantinople, vendu dans toutes les rues sous l'œil bienveillant de la police, est plein d'excitations contre les Arméniens et d'injures à l'adresse des étrangers. Il affirmait, entre autres, il y a peu de jours, que le coup de main de la Banque ottomane avait été organisé par sir Edgard Vincent lui-même. Pour qui connaît la crédulité du peuple turc, il y a là un danger auquel devrait parer la censure au plus tôt et à tout prix. La frontière de la Turquie devrait fermer ses portes au mensonge avec la même rigueur au moins qu'à la vérité si sévèrement bannie, et les journaux français, tous poursuivis par la police, auraient le droit de s'étonner de la protection donnée à leur confrère de Philippopoli.

La censure, on le sait, ne se contente pas ici des ciseaux, elle tient la plume. Toute la presse locale est dirigée par elle. Il faut donc la rendre responsable de la publication en feuilleton par divers journaux de la plus fanatique des « histoires de l'empire ottoman ». L'ouvrage est classique, à la portée de tous ; sa diffusion ne pouvait s'imposer qu'en vue d'un but politique quelconque. Il est facile à deviner.

*Le journal est vendu sous l'Odéon ; au 38, rue Monge, et au kiosque n° 10, Mme Lelong, boulevard des Capucines, en face du Grand Café.*

*Le Gérant : HOUILLON.*
