# Supplementary material
Source: Research Square preprint supplement (doi:10.21203/rs.3.rs-9653111/v1)
Supplement: Supplementary file 4 [file Meşveret\1367_a025.pdf › Primary Sources/Meşveret\1367_a025.pdf]

REDACTION

48, Rue Monge, 48

PARIS

# MECHVERET

Organe de la Jeune Turquie

PUBLIÉ SOUS LA DIRECTION DE **Ahmed RIZA**

PARAISANT 2 FOIS PAR MOIS

Prix du Numéro

10 CENTIMES

« Ordre et Progrès »

## LE GRAND COUPABLE

Vingt ans d'un pouvoir arbitraire; vingt ans de ruines, de catastrophes, de hontes, d'humiliations; vingt ans de persécutions, de tyrannie, de sang ont fait perdre à la Turquie son rang de grande puissance, rompre son intégrité, compromettre son indépendance.

Seul coupable, puisqu'il a tout voulu réunir entre ses mains, Abdul-Hamid a fourni la preuve écrasante qu'il ne sait pas gouverner. Esprit étroit, haineux, sans culture; nature torueuse; caractère faux et finassier, il a invariablement recours aux pires moyens, aboutissant nécessairement aux pires résultats. Du reste, pas plus les guerres que les révolutions, pas plus les démembrements que les massacres, pas plus l'aversion populaire au dedans que l'indignation générale au dehors, ne semblent servir d'enseignement à cet être malfaisant qui évoque le souvenir de ces sinistres personnalités de la décadence romaine et du Moyen-Age.

Insensible aux conseils, aussi bien qu'aux remontrances, et même aux menaces, Abdul-Hamid spéculé, à l'intérieur, sur les effets de terrorisme, à l'étranger, sur les divisions.

Si la conservation d'un pouvoir monstrueux et sans frein devait avoir pour unique conséquence l'effondrement plus ou moins rapide d'un grand Empire, certaines vues politiques connues s'en accommoderaient certes fort bien. Heureusement, en dehors des sentiments chevaleresques auxquels on ne fait jamais vainement appel en France, des préoccupations politiques d'un ordre élevé paraissent avoir déterminé une action diplomatique, qui rechercherait l'application, en Turquie, de mesures financières et administratives destinées à assurer le relèvement graduel du pays. Or, des mesures de cette nature seraient inconciliables avec le système actuel, auquel le Sultan se raccroche avec acharnement. Il faudra donc ou les lui imposer ou le déposer.

Sans doute, les moyens coercitifs — et pas autre chose — finiraient bien par avoir raison de son obstination. Mais, en feignant de se soumettre, il travaillerait sourdement à tout miner, à tout paralyser, de façon à récupérer insensiblement l'influence perdue. On s'exposerait ainsi à une lutte de tous les jours contre de ténébreuses machinations, alors qu'on aurait, au contraire, besoin d'une bonne volonté sincère et de la plus grande liberté d'esprit pour mener à bien une œuvre complexe d'apaisement moral et de réformes matérielles. Aussi, le moyen le plus sûr et le plus expéditif d'entreprendre quelque chose de sérieux en Turquie, profitable à la fois aux populations ottomanes et à la paix de l'Europe, consisterait à éliminer tout bonnement Abdul Hamid du trône et à y placer le prince de la maison d'Osmán, auquel il reviendrait légitimement : car une expérience douloureuse a surabondamment démontré qu'Abdul Hamid constitue un véritable danger public. Ne reculant devant aucune atrocité, violant toutes les lois et les traités, manquant à toutes ses promesses, semant la haine et la division, répandant la méfiance et la terreur, causant des conflits pouvant déterminer une conflagration européenne, comment pourrait-on compter sur la transformation soudaine et miraculeuse d'une nature essentiellement pernicieuse et perverse, et comment, sans cette transformation, espérerait-on introduire des réformes, dont la moindre se heurterait immédiatement à des habitudes invétérées et à des intérêts personnels évidents ?

En résumé, Abdul Hamid mène l'Empire à une perte certaine et définitive. Mais si, sous une unanimité apparente, il y a, *chez tous*, sincérité effective, l'Europe pourrait encore facilement sauver la situation, à la condition toutefois d'écarter, au préalable, le grand coupable, l'ennemi de tout progrès, de toute liberté et de toute justice, ce nouveau « fléau de Dieu » auquel l'histoire réservera un chapitre écrit en lettres de sang. Autrement, l'efficacité d'un plan, qui comporterait la coexistence de celui qui croirait avoir tout avantage à en détruire les bienfaites et salutaires dispositions, nous laisserait sceptique.

G. UMID.

## L'EUROPE DEVANT L'OPINION

Depuis quelque temps la diplomatie européenne opère un mouvement de concentration très intéressant à suivre. Honteuse de n'être point intervenue pour empêcher les massacres qui pendant deux années ont ensanglanté la Turquie, elle cherche visiblement à se faire pardonner cette faute en se groupant et en faisant mine de s'entendre sur l'éternelle question d'Orient, la question qui, à coup sûr, la divise le plus ! Cet accord n'a qu'un défaut, c'est de ne point exister. Oui, tout le monde est d'accord, mais à la condition expresse, absolue, que chacun agira de son côté pour faire avorter les combinaisons qui auraient été concertées en commun. On en est arrivé à ce point à Yildiz-Kiosk, que lorsqu'une démarche collective doit être faite, le Sultan en est avisé à l'avance, et donne aux ambassadeurs la réponse qui lui a été soufflée par l'un d'entre eux ou même par deux. Il fait donc semblant d'écouter les conseils de M. de Nélidof, les suggestions intéressées de l'ambassadeur d'Autriche, les insinuations de la perfide Albion, les leçons de M. Cambon, qui est le précepteur préféré de S.M. et jusqu'aux rodomontades de l'ambassadeur d'Italie; mais il sait au fond à quoi s'en tenir. Au besoin, les conseillers se chargeraient de l'instruire séparément de leurs intentions secrètes. Telle est en raccourci la comédie qui se joue à Constantinople. Elle est peu récréative, mais elle va au tempérament des cabinets qui, enchantés des résultats obtenus jusqu'ici, comptent désormais s'en rapporter entièrement à leurs représentants pour la direction des affaires orientales. Aussi devons-nous nous attendre à de beaux exploits de la part du Palais qui n'attend pour reprendre son allure ordinaire que l'arrivée de l'argent de l'emprunt. Les ambassadeurs feraient bien de tenir la dragée haute aux hôtes de Yildiz, sachant par expérience combien ils sont accessibles à l'appât de l'or. Mais ne remarquez-vous pas comme tout cela est peu digne de l'Europe, n'admirez-vous pas le savoir-faire de ces ambassadeurs qui depuis des années se trompent mutuellement tout en paraissant être unis. Le public qui n'est pas bien au courant des dessous de la politique prend ces démonstrations pour du bon argent et se dit que puisqu'ils s'entendent tous, le Sultan va finir, sans doute, par faire leurs volontés et procéder sérieusement à l'exécution des réformes promises. Oh ! que non.

Loin de nous la pensée de déprécier les mérites et la haute intelligence des représentants des grandes puissances à Constantinople, pas plus que nous ne méconnaissons la supériorité intellectuelle des hommes d'Etat qui dirigent la politique étran-



gère de leur pays. Nous dénonçons simplement la vétusté de ce procédé qui consiste à avoir l'air d'agir d'un commun accord, alors qu'on ne s'entend pas du tout ; mais pas du tout. Mieux éclairée, l'opinion demande plus de sincérité et de franchise aux diplomates de haute marque ; elle leur demande surtout l'observation de certaines règles de justice et d'humanité dont ils semblent faire fi. Avec cette égoïste politique on perd les meilleures civilisations.

C'est le prince Lobanof qui, le premier, a affiché cet égoïsme *inconscient* ; le mot n'est point excessif, lorsqu'il s'agit d'un diplomate russe qui est parvenu à changer du jour au lendemain la politique traditionnelle de son pays, entraînant à sa suite la France de la Révolution. L'Autriche et l'Allemagne, en présence de cette attitude de la Russie, n'eurent garde de bouger ; elles laissèrent faire ce, pendant que l'Italie guerroyait contre Ménélik et que l'Angleterre, empêchée d'agir, se repliait en bon ordre et organisait sa campagne du Soudan.

La diplomatie européenne pour expliquer son indifférence a invoqué une autre raison, celle de la solidarité qui existe entre toutes les monarchies. Elle s'est dit : Si nous laissons Abdul-Hamid choir du trône, ce serait d'un fort mauvais exemple pour nos sujets, mieux vaut le soutenir avec ses bandits et la tourbe de cheiks fanatiques attachés à son service que de voir à la tête des affaires des hommes tolérants résolus à revendiquer pour leur pays les droits dont jouissent les nations civilisées. Le Sultan qui connaissait ces dispositions des souverains les a habilement exploitées. Il a contracté avec eux une assurance, puis une réassurance.

Il a fait son assurance avec Guillaume II, lorsqu'il vint à Constantinople, et sa réassurance avec le Tsar par l'intermédiaire de cet autre *honnête courtier* appelé Lobanof. Par la première opération, le Sultan s'est assuré la neutralité de l'Autriche ainsi que les sympathies du roi de Prusse, sympathies qui se sont déjà affirmées en diverses circonstances, voire après les premiers massacres d'octobre 1895. Par la seconde opération, il s'est assuré l'impunité, le retrait d'une partie de l'indemnité russe et d'autres avantages personnels qui seront connus dans la suite.

En ce moment, Abdul-Hamid est l'obligé de l'Empereur d'Allemagne et du Tsar ; il sera l'obligé de la France lorsque l'emprunt promis aura été réalisé. Alors seulement tous ses désirs seront comblés.

Et je me reporte par la pensée à quelques années en arrière, à cette époque où l'ambassadeur d'Angleterre faisait les plus louables efforts pour obtenir le châtiement du célèbre brigand Kurde Moussa que le Sultan actuel couvrait de sa haute protection. Aujourd'hui l'Europe se contente d'arracher quelques pauvres victimes au jugement des tribunaux sanguinaires institués par le tyran. Quant à châtier les assassins, personne n'y songe. Ah ! il y aurait une belle étude à faire sur l'abaissement de l'Europe au contact de la corruption générale. L'opinion de la postérité sera sévère pour les hommes d'Etat de cette fin de siècle et pour les chefs de gouvernement qui ont laissé périliter entre leurs mains le dépôt sacré, celui de l'amour de la justice et de l'humanité, comme elle sera sévère pour les peuples qui après avoir conquis la liberté de haute lutte, se sont laissés corrompre et n'aspirent plus qu'à la servitude et à leurs traditions libérales.

HALIL GANEM.

## ANARCHIE MORALE & MATÉRIELLE

Si les gouvernements et les peuples n'étaient pas déjà suffisamment édifiés sur le caractère et les agissements d'Abdul-Hamid, leur conviction à cet égard achèverait de se faire.

Réclame-t-on des réformes, il déclare imperturbablement qu'elles ont toutes été appliquées en Asie et en Europe.

Les finances sont admirables, puisque le budget se solde non seulement en équilibre mais en excédent.

Les prisons ne contiennent aucun innocent.

Les coupables ressentent la rigueur des justes lois.

Les arrestations et les exils, démentis en même temps qu'ils sont annoncés.

En un mot, on persiste à se moquer du monde de la façon la plus solennelle, puisque ces pitoyables plaisanteries, où l'impudence le dispute à la mauvaise foi, sont consignées dans des circulaires et des communiqués diplomatiques livrés, sans vergogne, à la publicité.

L'anarchie, le chaos, le brigandage, le désarroi moral, la misère, les arrestations et les exils arbitraires, les persécutions contre tous les honnêtes gens, la vénalité, le mépris des lois, l'espionnage, la délation, la dilapidation des deniers publics, les disparitions isolées à côté des tueries en masse, l'emploi aux fonctions élevées des pires éléments du pays, la tyrannie sous toutes ses formes, voilà les seules réformes, les seuls bienfaits dont puisse s'enorgueillir le régime actuel.

Nous conseillons donc à Abdul-Hamid à Izzet, et à toute la bande qui, sous leurs auspices, exploite et opprime notre malheureux pays, à être désormais, ne fût-ce que par prudence, plus réservés dans leurs audacieuses affirmations. On n'abuse pas à la longue impunément de la patience publique.

G. UMD.

## Le Journal de Genève & les Jeunes Turcs

Nous avons en trop haute estime l'opinion du *Journal de Genève* pour laisser passer sous silence les sévères appréciations qu'il émet en tête de ses colonnes sur l'avenir de notre parti. Notre confrère reconnaît la sincérité de nos sentiments ; mais il doute de l'efficacité du moyen mis à notre disposition par notre glorieux chef Midhat Pacha. Après avoir retracé, en termes qui s'écartent légèrement de ce profond sentiment de justice qui caractérise les jugements émis d'ordinaire par ce journal, la carrière du jeune parlement turc né le 27 septembre 1876, en des temps fort troublés, mort par dissolution le 14 février 1878, notre confrère rappelle l'insuccès de cet essai de parlementarisme sans tenir compte des difficultés contre lesquelles nous avons eu à lutter, du mauvais vouloir de notre souverain et des intrigues de toutes sortes dont on avait eu soin d'entourer notre enfance et il conclut ainsi : « Avouons-le, cette greffe britannique n'est pas faite pour vivre sur un tronc musulman. Si l'on veut rajeunir et régénérer la Turquie, il faudra que les Jeunes Turcs se mettent en frais de trouver autre chose, quelque chose qui soit fait pour les Turcs ». C'est fort bien ; que notre confrère, dont les bonnes et généreuses intentions nous sont connues, nous aide de ses conseils. Ce n'est pas une greffe britannique que nous avons cherchée, c'est une greffe contre le despotisme ; nous ne tenons pas, au surplus, au texte de la Constitution de 1876, nous nous contenterons de son esprit et de l'application de son principe qui est le contrôle des actes du gouvernement par les représentants du peuple et l'élaboration d'un budget régulier et d'une loi des finances. L'absolutisme de Guillaume II s'est soumis à ces règles qui sont l'essence même d'un gouvernement civilisé, pourquoi S. M. Abdul-Hamid II, ne s'y soumettrait-elle pas ? Le tronc musulman est fait du même bois que celui de tous les peuples. S'il est imprégné du sentiment religieux au point d'en devenir inflammable, les nations européennes n'ont-elles pas passé toutes par là ? Et ne s'est-il pas formé au sein de ces nations livrées ainsi aux sanglantes exécutions, fruit des guerres de religion, un parti modérateur, un parti libéral qui désavouait ces exécutions barbares et réclamait la liberté pour tous. Eh bien ! nous sommes, nous nous honorons d'être ce parti là.

Si quelque chose nous étonne et nous attriste, en même temps, ce n'est pas que « notre rêve bleu d'une Turquie libérale et constitutionnelle soit traité par le Sultan d'acte de révolte », ceci est



dans l'ordre ; ce qui nous étonne, ce qui nous attriste, encore une fois, c'est que nous ayions à nous défendre contre les libéraux en Europe, c'est que nous soyons sinon dénigrés systématiquement, du moins traités par eux de quantité négligeable. Détenteurs des traditions libérales, ils en jouissent un peu en égoïstes et semblent nous narguer parce que, étant Turcs, nous rêvons de liberté. Est-ce donc un si grand crime que de rechercher le progrès où il se trouve ? Et sur qui nous modeler sinon sur les nations qui ont progressé dans le monde grâce à leurs institutions libérales ?

Aussi pour les convaincre de la sincérité de nos convictions nous nous sommes imposé de grands sacrifices, nous avons fondé plusieurs organes dans lesquels nous essayons de rallier à nous les sympathies de nos confrères de la presse libérale. Vains efforts ! On nous répond : « Vous êtes des Turcs, trouvez quelque chose qui convienne aux Turcs ». Mais tout ce qui convient aux hommes et aux sociétés civilisées ferait bien notre affaire : L'ordre dans les finances, le maintien de la sécurité publique, la liberté de la presse, la justice, l'égalité, tous ces biens, nous les convoitons. Pour en doter notre pays, nous avons sacrifié notre avenir personnel et jusqu'à « cette ambition dont nous sommes doués ». Et quelle plus noble ambition que celle de tirer son pays de l'ornière sanglante où il gît, embourbé, et de l'acheminer vers ce coin d'azur du ciel libéral qui a été le rêve de tous les esprits généreux.

Nous savons qu'en cette fin de siècle la propagande politique n'est point de mise ; on rougirait d'être l'apôtre d'une idée, on cherche ce qui est positif, ce qui est d'une réalisation facile et l'on plait agréablement ceux qui se sont donné pour tâche d'arracher leur pays à la tyrannie. Que nous importe après tout ! Nous avons déjà obtenu un résultat que les esprits sérieux ne nous contesteront pas : Nous avons montré au monde que dans cette Turquie si bafouée et malheureusement si mal administrée, il y a un parti politique qui, malgré toutes les persécutions, a su se faire une place honorable en Europe et surtout dans son propre pays où il prend chaque jour un plus grand développement ; le *Journal de Genève* a raison de dire que ce parti est « redouté à Yildiz-Kiosk ».

Le marquis de Salisbury l'a dit un jour : Si les Turcs le veulent bien, ils auront la liberté. Or, les Turcs ont trop souffert jusqu'ici du despotisme pour ne pas ardemment désirer la liberté. Ils font mieux que la désirer, ils souffrent pour elle, et les souffrances qu'ils endurent constituent, au point de vue moral, la meilleure garantie pour la réalisation de leurs espérances qui, du reste, n'ont rien que de très légitime. Quand l'homme sinistre et infernal qui du fond du sérail dirige toutes les machinations que l'Europe a tant de peine à déjouer, qui arme les Vieux Turcs contre les Jeunes Turcs, espérant créer par là une diversion favorable à ses projets, aura disparu de la scène, quand il aura reçu le châtimement qu'il a encouru du fait de tant d'horribles crimes perpétrés impunément sous les yeux de l'Europe, nous aurons la joie d'assister, satisfaits, à ce triomphe tardif de la justice et au relèvement de notre chère patrie mise à mal par nos institutions surannées fondées sur le despotisme et l'arbitraire. Notre rêve bleu n'est pas aussi loin de sa réalisation qu'on le pense ; nous en savons quelque chose.

H. G.

## CE QUE L'ON NE DIT PAS

Depuis un mois, depuis les déclarations portées à la tribune française et les discours de quelques hommes d'Etat Anglais, un grand silence s'est fait, dans les régions officielles sur ce qu'on appelle la question d'Orient. Ce silence effrayant est à peine troublé par de faibles échos qu'on peut recueillir çà et là dans les journaux.

On attend sans doute, le massacre de quelque missionnaire étranger pour faire entendre de nouvelles représentations au gouvernement turc. L'Europe protectrice des chrétiens ferme l'oreille aux cris de l'humanité. Elle se soucie peu de ce qui se passe à Constantinople si les populations ottomanes ont seules à

souffrir. Quelques journaux font à peine mention des arrestations et des bannissements qui frappent journellement les Jeunes Turcs ; d'autres publient aussitôt de honteux démentis de source officielle et le silence s'établit de nouveau dans la presse européenne, tandis que les atrocités continuent en Turquie.

Pour y mettre un terme, je ne réclame point de démonstration navale ou d'intervention armée ; je ne compte pas non plus sur l'efficacité d'une interpellation à la Chambre. Mais, une fois n'est pas coutume : l'Europe pourrait parler au nom de l'humanité et prendre en main la défense des Turcs persécutés, en oubliant qu'ils sont musulmans et en se rappelant qu'ils sont des hommes. A la suite du discours de M. Hanotaux, le gouvernement turc a fait savoir, par l'intermédiaire de son ambassadeur, que les personnes *injustement* arrêtées allaient être mises en liberté et qu'on n'exercerait plus aucun arbitraire contre les populations paisibles. Qu'est-il advenu de ces belles promesses ? Quelques Arméniens ont été relâchés ; mais, par contre, on a procédé à de nouvelles arrestations qui ont eu lieu par centaines. Le Ministre de la Police, accusé d'être assez doux pour les Arméniens et pas assez sévère pour les Jeunes Turcs, a été révoqué et remplacé par un favori du Sultan. Celui-ci, avec le zèle du néophyte et pour prouver qu'il est bien digne de la confiance du maître, s'est livré à toutes sortes d'exactions contre le parti des réformes. Un scheik, plusieurs ulémas, des étudiants, des fonctionnaires ont été arbitrairement emprisonnés, dans ces dernières semaines.

Quatorze élèves de troisième classe de l'Ecole de Marine sont en ce moment soumis à la torture dans les cachots militaires de Constantinople. Leur crime était d'avoir ouvert une souscription en faveur de leurs camarades exilés et pour la propagande des idées libérales et libératrices. Une sorte d'état de siège permanent est dans la ville ; des patrouilles circulent sans cesse par les rues des quartiers turcs et quand on s'informe du motif d'un pareil déploiement de force militaire on répond qu'il est organisé contre les Arméniens. La chasse n'est pourtant plus dirigée aujourd'hui contre les Arméniens. On réserve toutes les rigueurs de la répression aux partisans de la Jeune Turquie. On prodigue aux Arméniens la flatterie et les caresses dans la crainte qu'on a de les voir s'unir aux Jeunes Turcs et faire avec eux cause commune. Nazim Pacha, l'ex-ministre de la police sera dit-on, exilé à Taïf en Arabie ou à Bassora. Nazim était un esprit assez libéral, un journaliste énergique et mordant ; il avait jadis écrit des articles, demeurés célèbres, contre l'esclavage ; mais le Sultan très habile à corrompre les plus nobles caractères en exploitant leurs faiblesses (nul n'en est tout à fait exempt) avait réussi à plier à son service et à ses caprices cet homme, digne d'une meilleure destinée. Une fois admis dans l'intimité du Sultan et devenu le dépositaire de ses secrets, il a porté ombrage à son maître que certaines révélations pouvaient compromettre. Aussi a-t-il été exilé et sans doute périra-t-il de quelque maladie subite et mystérieuse comme il est arrivé à tant d'autres personnages qui ont payé de leur vie la faveur passagère du souverain.

Nous n'avons pas à prendre la défense d'un fonctionnaire disgracié ; mais nous défendons un principe. Nous combattons toujours et en toute circonstance, quelle qu'en soit la victime, l'arbitraire et le despotisme. On ne peut admettre, dans un pays civilisé, ces arrestations, ces exils sans jugement et sans forme de procès. Il est vrai qu'un procès ferait la lumière sur les motifs de ces mesures tyranniques et que souvent l'accusé deviendrait pour son persécuteur et pour ses juges le plus dangereux, le plus terrible des accusateurs.

AHMED RIZA.

## UNE RÉPONSE A L'INTERVIEW DE FUAD-PACHA

Le maréchal Fuad-Pacha a été interviewé par le correspondant du *Lokal Anzeiger* de Berlin. Il a tenu, en cette occasion, un langage que, malgré notre grande estime pour ses talents militaires, nous ne pouvons laisser passer sans réfutation. Il a dit



en substance que le Sultan n'est pas responsable des fautes et des crimes du gouvernement actuel, et qu'il faut en attribuer la cause à l'incapacité ou à la perversité de son entourage immédiat et des hauts fonctionnaires de l'Etat. Mais qui donc choisit ces incapables et ces malfaiteurs? N'est-ce pas le Sultan lui-même qui, éloignant tous ceux dont le caractère est digne et dont les talents seraient si nécessaires dans une situation si critique, n'appelle auprès de lui et ne comble de ses faveurs que les personnages les plus plats et les plus serviles? On ne peut rappeler sans douleur les hommes de valeur et de dévouement que le Sultan a écartés et a fait périr, parce qu'ils mettaient le bien public avant les fantaisies du souverain! Rendait hommage à la mémoire de Rustem Pacha, lord Salisbury mêlait un regret à ses éloges et déplorait que sous le règne d'Abdul Hamid on ne vit plus au gouvernement ces personnages éminents qu'on y admirait autrefois.

Le système que nous blâmons dans l'interview de Fuad-Pacha, et qui consiste à décharger le Sultan de toute responsabilité dans les malheurs actuels, en rejetant la faute sur la nation turque et sur ses serviteurs, a fait le plus grand mal à notre pays. Ceux qui tiennent un semblable langage et répandent cette calomnie deviennent, sans le vouloir peut-être, les complices du Sultan dans son œuvre criminelle. Ils arrivent ainsi à donner le change, en Turquie comme en Europe, à l'opinion publique. Le seul, *le grand coupable*, comme le proclame plus haut notre éminent collaborateur, c'est le Sultan Abdul Hamid. Il importe qu'on le sache bien, dans notre pays et à l'étranger, pour l'honneur et le salut de l'Empire ottoman.

Fuad Pacha critique, en outre, le projet d'un gouvernement représentatif « Jugez, dit-il, ce que serait une Chambre de Députés, élue par un peuple qui ne sait ni lire ni écrire! » Mais d'abord il est inexact de prétendre que l'instruction élémentaire soit aussi peu répandue en Turquie : la moitié au moins de la nation sait lire et écrire et, dans cette moitié, la moyenne intellectuelle est certainement supérieure à celle du Sultan. Et pourtant on lui permet de choisir, à tort et à travers, les fonctionnaires et les chefs d'armée, tandis qu'on refuse aux citoyens les plus éclairés le pouvoir infiniment plus modeste d'élire un député. Si, d'ailleurs une bonne partie des populations ottomanes reste dans l'ignorance, la faute en est encore au Palais qui a laissé tomber en désuétude la loi sur l'instruction gratuite et obligatoire, promulguée sous le règne de son prédécesseur. L'application de cette loi, depuis vingt ans, aurait produit une génération qui, d'après les théories du Fuad Pacha, eût été capable de remplir ses devoirs électoraux. Si tant est qu'il soit nécessaire de posséder une science bien profonde pour faire choix d'un honnête homme. Le Chéri (loi religieuse) qui impose une assemblée représentative n'exige pas des électeurs d'autre science.

Nous avons été souvent tentés de nous plaindre de linertie et du silence où s'enferment d'autres maréchaux. Mais le langage tenu par Fuad Pacha nous semble aujourd'hui plus fâcheux et plus préjudiciable aux intérêts du pays que l'attitude indifférente et le silence de ses collègues.

A. R.

## DÉCHÉANCE !

« Pour ce qui est de ces monstres qui sous le titre de souverain se rendent les fléaux et l'horreur de l'humanité, ce sont des bêtes féroces dont tout homme de cœur peut purger la terre. »

WATTEL. — *Droit international*,

Les réformes ont été promises et les représentants des puissances, surmenés par le dur labeur de faire comprendre au Sultan le danger que court son pays, sont dans une attitude expectante quant à la réalisation de ces promesses : Mais, selon une vieille formule « Pas d'argent ... » et qui désire des réformes doit avoir les cordons de sa bourse déliés. Le trésor ottoman est complètement à sec, les folles dépenses du Palais ayant tout

absorbé. Abdul-Hamid, comme nous nous y attendions, plaça donc son argument suprême, exposa nettement la situation délabrée des finances et parvint à toucher le cœur sensible de l'Europe comme il était arrivé à mettre sa responsabilité à couvert, du moins aux yeux de la diplomatie, en attribuant au brusque réveil du fanatisme les massacres organisés par ses ordres.

Quelques changements insignifiants, quelques révocations dérisoires, certaines permutations sans importance ordonnées par Iradé donnèrent une apparence de sincérité et de noblesse à ses intentions.

Quant à nous qui connaissons les personnages de notre pays qui n'ignorons point leur précédents et leur valeur intrinsèque, nous avons vu dans ce remaniement partiel une nouvelle comédie dans le genre de Tartuffe ; nous avons vu dans les nouvelles créatures des ignorants et des incapables plus ignorants et plus incapables que leurs prédécesseurs ; nous y avons vu en un mot des châtiments infligés à des victimes et des récompenses décernées à des coupables. La très récente grâce accordée au malheureux Arménien Apik Effendi n'infirme en rien notre conviction, car s'il y a un de grâcié, une foule d'autres Jeunes Turcs viennent d'être fraîchement arrêtés et livrés au féroce minotaure de Béchik-Tach.

Quoiqu'il en soit les ambassadeurs à Constantinople, généreux tuteurs de l'Enfant prodigue lui pardonnent les frasques passées et sont en quête d'argent pour faire commencer les réformes. En attendant la réussite de la nouvelle combinaison encore à l'état de projet, le retour de l'ambassadeur de Russie est l'heureux moment où l'or affluera dans les caisses, vides depuis fort longtemps, arrêtons nous un instant et raisonnons un peu si vous le voulez bien.

Et d'abord les fermes résolutions dont nos oreilles ont été rebattues sont dépourvues de toute conséquence pratique attendu que, comme nous l'avons toujours déclaré, le Sultan, avec son inimitable habileté, éludera, quoi qu'on fasse, tous les engagements qu'il prendra, car il y verra une atteinte à sa liberté d'agir, liberté qu'il désire garder intacte. La surveillance que les ambassadeurs se proposent d'exercer pèsera lourdement sur lui, parce qu'une très ancienne habitude, remontant jusqu'au début de son avènement, lui a fait un pli que les efforts des représentants des puissances ne parviendront jamais, au grand jamais, à faire perdre. C'est là un grand vice fortement enraciné qu'aucun pouvoir humain ne pourra extirper. Si l'histoire est une résurrection, pourquoi s'obstiner à ne pas prendre en considération le long passé d'Abdul-Hamid et ne pas voir dans sa conduite actuelle la continuation normale de sa déplorable conduite antérieure ? La nature barbare peut-elle être dressée à la volonté des puissances, après que l'âge a dépassé la cinquantaine ? Si tout jusqu'à présent a péremptoirement démontré l'incorrigibilité des sujets, pourquoi s'acharner à appliquer des remèdes dont l'inefficacité n'est nullement douteuse ?

Pourquoi surtout, se laisser guider par des préoccupations viles et mesquines quand des millions d'êtres humains souffrent et pleurent ?

Les arrestations continuent chaque jour et celles qui ont été opérées ces jours derniers sont confirmées par lettres privées, malgré le démenti du télégraphe officiel. Elles n'en continueront pas moins quand l'Europe croira qu'elle a eu le dernier mot. La candeur des diplomates qui veulent résoudre définitivement la question d'Orient par de pareils moyens nous étonne, nous stupéfie.

Quant à l'argent qu'on va prêter au Sultan, il sera, nous en sommes sûrs d'avance, dépensé aux menus cadeaux qu'il éparpillera aux quatre points cardinaux et à l'augmentation de la légion, de jour en jour croissante, des espions et des sbires. Il n'y a donc pas à hésiter et puisque l'on ne veut faire rétablir la Constitution suspendue pour ne pas « enlever à la Russie son caractère d'héritier présomptif à la Turquie » le seul remède qui s'impose c'est la déposition. La Sainte Alliance avait prononcé la déchéance des Napoléon au nom du Droit international Européen. Une nouvelle alliance qui prend aujourd'hui sur les bords du Bosphore le titre de *Concert européen* doit l'imiter en cette circonstance, et prononcer *par raison d'humanité* la



déchéance de ce souverain monstre qui est devenu, comme dit Wattel, le terrible fléau. Il est vrai que la Sainte-Alliance se basait à tort sur le Droit international pour enfreindre ce même Droit, mais le Concert européen se basant sur les droits de l'humanité serait absous par les étrangers et cent fois béni par la nation Ottomane. Il n'y aurait qu'une exception de plus pour une cause très noble, ajoutée au droit déjà exceptionnel qui régit les relations des puissances avec la Turquie. La belle formule du grand Wattel rapportée en tête de ces lignes semble avoir été dictée pour S. M. le Sultan et pour indiquer la voie à suivre aux diplomates européens.

FUAD.

## LA JEUNE TURQUIE

PAR KARL BLIND

Tiré du *Fortnightly Review*

M. Karl Blind, écrivain très connu et apprécié en Angleterre, a publié dans *Fortnightly Review* un long et intéressant article sur la situation politique de l'Orient. Une personne dévouée à notre cause a bien voulu traduire pour nous cette étude très documentée. Nous en extrayons certains passages pour les mettre sous les yeux de nos lecteurs, en laissant toutefois de côté les notes biographiques et personnelles que l'auteur a consacrées aux principaux représentants du parti de la Jeune Turquie :

Les Jeunes Turcs de notre temps ont tout à fait raison de rappeler que leur pays, même aux temps reculés a agi dans un esprit de tolérance religieuse plus avancée que l'Empire Moscovite, et que la Turquie méprisée a donné une généreuse hospitalité aux exilés de la liberté.

Mais qui sont ces Jeunes Turcs ? se demandent plusieurs ; et quel est leur but et leur aspiration ? Leur agitation n'est-elle pas éphémère et sans fondement solide.

A cette question nous ne donnerons qu'une réponse prise d'une lettre du *Times* par Sir Henri Elliot qui était ambassadeur à Constantinople quand la Chambre Ottomane y siégeait ; il y a de cela près de dix-huit ans, et qui pense qu'un rappel de la Chambre serait le seul moyen de résoudre ce terrible problème. « Le Sultan » dit-il, est en ce moment bien plus effrayé du parti de la Jeune Turquie qu'il ne l'est des puissances étrangères, car il sait que derrière ce parti il y a les vœux de la majorité de ses sujets, et il essaye de les réprimer avec une main de fer.

Mais avant de pénétrer plus avant dans ce sujet, il faut rappeler quelques faits importants. Il y a près de trente ans un mouvement qui avait pour objet l'abolition de la forme arbitraire du gouvernement se manifestait en Turquie ; l'établissement de la Chambre Ottomane, le contrôle du budget par des représentants du peuple, et la liberté de conscience ainsi que les droits civils pour tous. Le parti qui travaillait à cette réforme fut principalement recruté dans la jeune génération, particulièrement dans les classes instruites de la société.

Les hommes d'âge mûr ne manquaient pas cependant parmi ces réformateurs. Pour des raisons de sécurité personnelle, ils n'affrontèrent pas le grand danger de s'afficher.

Midhat Pacha bien que n'appartenant pas au groupe de la Jeune Turquie était néanmoins considéré comme un de ses piliers. Midhat appartenait à la religion d'une secte Mahométane ; car les « fatalistes qui croient au Coran » comme sont appelés ceux qui voient seulement à la surface ont aussi leur secte comme toutes les autres religions « Même le Turc impénétrable » — comme disait Carlyle — ou « Le grand spécimen Antihumain de l'humanité » — comme Monsieur Gladstone appelait jadis une nation entière — n'est pas une preuve contre le progrès intellectuel.

N'oublions pas que depuis Lord Byron qui combattit pour la cause de la Grèce, le peuple Turc, malgré les Pachas corrompus a été reconnu par tous les voyageurs comme possédant d'excellentes qualités. C'est un fait connu que parmi eux le fatalisme a

pour ainsi dire disparu et fait place à une religion plus éclairée. Et même comme dans l'Europe Occidentale le droit divin des rois a été disputé avec succès par les défenseurs des droits du peuple.

Dans les années précédant 1876 Midhat essaya à plusieurs reprises d'appeler l'attention de la Porte sur la nécessité d'avoir une assemblée législative. Il ne réussit pas pendant quelques temps, le seul résultat fut la disgrâce de l'auteur et l'expulsion d'un certain nombre de Jeunes Turcs.

Je me souviens qu'en 1867 et 1868 un petit groupe de ces exilés vivait ici. — Zia Bey, Ali Suavi, et Aghiah effendi — publièrent un journal *Le Mukhbir* à Londres et à Paris. Il était rédigé sous les auspices de Moustafa Fazil Pacha, homme d'Etat bien connu qui contribua beaucoup à propager l'instruction et les idées libérales en envoyant des jeunes étudiants et autres et parmi eux un poète distingué, Kémal à Paris et à Londres. Quelques fois le *Mukhbir* parut avec des textes Anglais et Français dans lesquels les institutions parlementaires ainsi que d'autres réformes étaient demandées.

Ayant pris des informations au sujet de ces personnages, j'ai appris d'Amed Riza Bey, que Zia, Suavi, Kémal et d'autres périrent dans l'exil.

Dans un Mémoire mémorable le Jeune Sultan déclara en 1876 que le déclin de l'Empire devait être attribué au gâchis administratif. Le jour heureux de la proclamation de la Constitution, il invoqua la mémoire de son père qu'il nomma le régénérateur de l'Empire. Abdul Hamid II ajouta, que, sans aucun doute si son père eût vécu plus longtemps, il aurait établi une constitution semblable. La Providence, néanmoins lui réservait comme descendant la tâche d'accomplir cette transformation qui est la plus haute garantie du bonheur de ses sujets. Abdul Hamid remercia le ciel de lui avoir confié cette haute mission. Le Sultan rappela certains abus résultant de la domination arbitraire de quelques individus. Il énuméra ensuite les principes de la nouvelle Constitution, qui comprend la responsabilité des Ministres, le droit parlementaire, l'indépendance des cours de Justice, l'équilibre du budget « tout cela » disait-il « est conforme aux doctrines religieuses de Mahomet ». Dans un discours qu'il prononça plus tard, Abdul Hamid expliqua à la Chambre les causes de la décadence du pays. Il ajouta : — « Si nous n'avons pas encore atteint le niveau des pays civilisés, il faut en chercher la cause dans l'instabilité des institutions qui sont nécessaires à la prospérité de l'Etat. Cette instabilité est produite par le fait que tout jusqu'à présent a été l'œuvre d'un gouvernement absolu qui ignore les principes salutaires de la délibération en commun » et dans un autre discours Abdul Hamid répète encore : — Le bonheur de l'Empire dépend entièrement de l'application de la Constitution.

Il ne faut pas s'étonner que de nos jours les Jeunes Turcs se réclament de ces déclarations. Ils disent : quand la Chambre Ottomane s'assembla on déclara dans un décret et, dans une communication aux Puissances que la Chambre serait convoquée de nouveau, après la conclusion de la paix. Le parti de la Jeune Turquie, parlant au nom du pays, possède dans les promesses du Sultan, un droit ferme et se trouve sur un terrain légal pour combattre. Dix huit ans se sont passés depuis la convocation de la Chambre Ottomane. Quelques uns de ses membres furent exilés à cette époque, les autres furent renvoyés à leurs foyers. Mais la jeune génération des Turcs libéraux se réclame encore de l'existence légale de la Constitution et du serment formel d'Abdul Hamid, que la Chambre serait convoquée après la conclusion de la paix avec la Russie.

Chose étrange, au mois de novembre de l'année dernière, il semblait qu'un pareil événement allait se s'accomplir. Des nouvelles de Constantinople, parlaient des coups et contre-coups politiques dans les sphères les plus élevées du gouvernement, avec cette rapidité qui est la marque des révolutions. D'abord, on assurait que, après l'élévation de Kiamil Pacha au poste de Grand Vizir une communication officielle avait été publiée dans les journaux, que l'intention du Sultan était de promulguer une nouvelle Constitution, mais avant que cette communication pa-



rut dans les journaux, un contre-ordre arriva défendant de la publier. Le jour suivant Kiamil fut exilé.

Dans le *Mechveret*, Halil Ganem proteste énergiquement contre le projet d'un protectorat Européen. Il dit : Nous voulons que notre pays maintienne son entière indépendance. Le peuple Ottoman qui doit dorénavant diriger sa destinée, ne doit pas être chargé de chaînes ni traîner un boulet au pied.

Nous n'échapperons pas au despotisme du triste Monarque qui règne sur nous, pour nous soumettre à un despotisme encore plus intolérable. Si nous devons périr, nous périrons plutôt que de nous soumettre à un pareil joug, qui nous deshonorerait sans nous sauver.

## LE RÉCIT D'UN ÉVADÉ

Notre vaillant camarade, le colonel Chefik Bey, a publié dans le *Rappel* un récit de son arrestation et de son exil. Nous en détachons les passages qui intéresseront le plus nos lecteurs étrangers :

Monsieur le rédacteur,

Dans votre numéro du 13 octobre, vous avez bien voulu annoncer mon évasion de la forteresse de Saint-Jean-d'Acre, ainsi que mon arrivée à Paris où l'hospitalière République me permet de respirer l'air pur de la liberté.

Je viens vous demander l'hospitalité de votre estimable journal pour donner des détails complémentaires sur la façon étrange dont on a condamné un colonel qui n'avait commis d'autre faute que d'aimer ardemment sa patrie.

Habi ués à l'admirable juridiction française, beaucoup de vos compatriotes qui attribuent à l'exagération ou à la malveillance les nouvelles d'Orient, auront ainsi une idée plus juste sur le caractère sauvage et les instincts barbares du sultan Abdul-Hamid.

C'était le 5 février 1896, à dix heures du matin. Vingt gendarmes cernèrent ma maison située à Bechik-Tach. On sonna violemment à ma porte et deux espions du palais (il n'y a que des espions dans ce maudit repaire de bandits), firent irruption dans mon cabinet de travail et sans daigner exhiber aucun mandat, se mirent à perquisitionner. Edifié depuis longtemps sur la valeur morale de ces individus, j'assistai à leurs recherches avec une indifférence sereine, malgré les cris et les pleurs de ma famille affolée et intimidée par les durs et grossiers propos de ces abjectes créatures.

Aucun écrit compromettant ne fut découvert. Néanmoins, pour donner une preuve de leur flair, les espions ramassèrent soigneusement des papiers sans valeur et m'emmenèrent au Yıldiz. Les accusés politiques ordinaires sont préventivement détenus à Bechik-Tach, chez le terrible Hassan-Pacha, commissaire de police, ou au ministère de la police ou au ministère de la marine, — ministères dont les titulaires sont les plus dévoués serviteurs du sultan. Mais les accusés politiques les plus redoutables et les plus influents sont conduits directement au Yıldiz.

La justice secrète abolie dans tous les Etats européens, ne se pratiquait pas d'une façon aussi terrible que celle qu'Abdul-Hamid rend actuellement en son palais à l'abri de toute indiscretion. Et dire que l'Europe croit aux promesses d'amélioration qu'on lui fait sur la simple dissolution du tribunal extraordinaire quand le vrai foyer de l'Inquisition se trouve au palais même du Grand-Inquisiteur, l'archi-assassin Hamid, pour l'appeler par son vrai nom.

Cependant ma qualité d'aide de camp du ministre de la guerre et surtout ma parenté avec lui, me préservèrent des tortures effroyables que subissent en pareilles circonstances ceux de mes compatriotes qui tombent dans les griffes de cette valetaille érigée en espions attirés et remplissant en même temps les fonctions de magistrats du palais.

Après une angoissante attente, je fus donc appelé dans la chambre du célèbre favori Izzet-Bey qui, flanqué de ses deux acolytes Faik et Assim-Bey, procéda à mon interrogatoire avec une dureté et une grossièreté inénarrables. Ne parvenant à m'ex-

torquer aucune parole qui pût servir leur projet criminel et ne possédant aucune preuve de culpabilité, Izzet-Bey me lança cette phrase qui me stupéfia et qui m'apprit pour la première fois de quoi j'étais accusé : je voulais, paraît-il, soulever la population et l'armée contre Sa Majesté pour le faire détrôner !

Mon étonnement naturel mit en colère le jeune favori, qui redoubla de rigueur et me dit : « Vos dénégations ne pourront que vous faire du tort et, quoiqu'il n'y ait aucune preuve de vos machinations secrètes, les procès-verbaux de mes secrétaires et de mes espions suffisent amplement pour m'édifier sur votre compte et pour affermir ma conviction. »

Devant un tel aplomb, ma colère tomba et je répondis d'un ton sec qui trahissait mon dédain pour des juges aussi méprisables : « Si votre conviction est faite sans autres preuves que l'inepte témoignage de créatures d'une moralité plus que douteuse, il me semble inutile d'insister davantage. Frappez et soyez satisfait. »

Izzet-Bey — il faut lui rendre cette justice — eut la sagesse de s'en tenir là ; il disparut pendant une demi-heure pour aller prendre des instructions supplémentaires de son maître et revint avec Raghîb-Bey, que le Sultan avait chargé de terminer mon interrogatoire. Je me prêtai volontiers à ses questions, croyant avoir affaire à un être plus humain, plus éclairé. Hélas ! il n'en était rien !

La résistance et la franchise d'un militaire ne convenait point à ces hommes dont la carrière de mensonges, de duplicité et de perfidie contrastait avec celle que j'avais parcourue. C'est ainsi que, voyant leurs efforts échouer, ils tentèrent de me corrompre en me promettant de la part du Sultan non seulement la liberté, mais encore une très grande récompense si j'indiquais quelque complot ou quelque réunion secrète, ou si je dénonçais quelques personnes affiliées à la Jeune-Turquie.

La dignité militaire foulée aux pieds par celui même qui s'affuble du titre fallacieux de « ghazi » (victorieux), et qui se targue de ses illustres ancêtres, me révolta. Dès lors, ma condamnation éventuelle et presque certaine me parut comme un honneur, comme la seule faveur que je puisse mériter.

Cinq jours plus tard, on me conduisit à la caserne de Suleymanîe. J'étais privé de toutes relations avec l'extérieur et ma pauvre famille ignorait complètement si je vivais encore.

Le terrible arrêt de dégradation avec déportation dans une enceinte, lu au milieu de mes anciens camarades me parut donc comme une heureuse délivrance ; il me semblait que j'étais arraché des griffes de ces bandits qui souillaient mon uniforme.

Aussitôt condamné, je fus conduit à la préfecture de police d'où, sous l'escorte de six gendarmes, on me fit entrer à la prison générale. Une mauvaise chambre, étroitement surveillée, me servit de demeure et quand je pense à tous les malheureux qui m'ont succédé dans cette geôle — et ils sont innombrables — malgré moi, j'en tressaille encore de frayeur.

Quatre journées s'écoulèrent. Puis je fus embarqué à bord du bateau *Césarée*, en partance pour la côte de Syrie. D'autres condamnés, le commandant Ahmed-Bey et le général de division Izzet-Pacha, avaient été amenés avec moi à bord. Ahmed-Bey était dirigé vers Rhodes, moi à Saint-Jean-d'Acre et Izzet-Pacha à Alep.

Je débarquai à Saint-Jean par une très belle journée de printemps. Peu après, il me fut facile de trouver des moyens d'évasion.

## LE FRANÇAIS EN TURQUIE

On lit dans le *Rappel* du 8 décembre :

Nous sera-t-il permis de demander au gouvernement pour quelles raisons il a cru devoir décerner, au mois de juillet dernier, la rosette d'officier de l'instruction publique à l'ambassadeur du Sultan à Paris ?

La question peut paraître oiseuse. On va voir qu'elle l'est moins qu'on ne croit.



Depuis longtemps, Abdul Hamid cherche à restreindre de plus en plus l'enseignement du français en Turquie.

Il sait que la langue est un puissant instrument de propagande pour les idées d'un peuple et il craint que le français étant la langue la plus répandue dans son empire après le turc, l'arménien et le grec, ses sujets, en l'étudiant, n'apprennent aussi l'horreur du despotisme et l'amour de la liberté.

Dans ce but, il a expurgé du programme scolaire toute l'histoire de la Révolution et la plupart des œuvres de nos philosophes, il a contraint les écoles turques à refuser l'offre qu'on leur avait faite de payer la moitié du traitement du professeur qu'elles s'attacheraient, il a renvoyé de partout, sauf de l'Ecole impériale qui est sous la protection de notre ambassade, les professeurs de nationalité française qui s'y trouvaient déjà.

Bien mieux, il n'a pas hésité, en 1893, à adresser aux ministères de l'instruction publique, des douanes, des travaux publics, de la guerre et des postes et télégraphes une circulaire invitant ces diverses administrations à cesser d'envoyer en France les élèves-boursiers de leurs écoles, de crainte qu'ils ne prissent, pendant leur séjour dans ce « pays de corruption », des idées subversives tout à fait fâcheuses.

La mesure, il est vrai, a été rapportée peu après, sur les réclamations de notre ambassadeur.

Mais cet été, on est revenu à la charge, et brusquement, au mois de juillet, on a rappelé à Constantinople les vingt-deux étudiants que le gouvernement turc entretenait à Paris.

Seul, le fils du fameux chambellan Izzet Bey a obtenu par faveur, de rester parmi nous. Tous les autres ont été envoyés en Allemagne où, du reste, il leur sera impossible de poursuivre leurs études, par la bonne raison qu'aucun d'eux ne connaît le moindre mot d'allemand.

Est-ce donc pour remercier le gouvernement ottoman d'une mesure aussi « peu amicale », comme disent les Anglais, qu'on a cru devoir décorer au même moment l'ambassadeur de Turquie à Paris de la rosette d'officier de l'instruction publique? On avouera qu'il est permis de se le demander...

A. H.

On sait que le Sultan, à maintes reprises, a envoyé des émissaires appartenant à certaines nationalités étrangères ou à l'administration de l'Empire ottoman près des divers comités arméniens. Ces envoyés étaient chargés de porter des paroles de conciliation et d'apaisement et de proposer, au nom du Palais, des mesures favorables aux aspirations de ces Comités. Ils avaient aussi pour mission essentielle de s'enquérir des liens d'affiliation qui pouvaient exister entre les Arméniens et le parti de la Jeune Turquie, des informer s'ils avaient le même programme et étaient disposés à s'unir en vue d'une action commune. Ce dernier point de l'enquête aurait pu être connu du Sultan qui se serait ainsi épargné la dépense de ses émissaires à un moment où l'argent est si rare et si nécessaire en Turquie. Il doit savoir, en effet, que la population ottomane ne peut avoir d'autres sentiments que ceux qui sont exprimés ici, c'est-à-dire le désir de voir limiter le pouvoir despotique du souverain et mettre un terme à ses désastreuses fantaisies. Quelles que soient l'origine, la religion et la nationalité des diverses populations qui composent l'Empire, elles sont unanimes dans leurs revendications : elles demandent toutes, la justice, la sécurité, l'ordre et les libertés nécessaires pour assurer leur individualité. Les Arméniens chez eux ne forment pas d'autres réclamations. Aussi avons-nous appris avec étonnement et regret que la réponse des divers Comités aux envoyés du Sultan, et particulièrement à Diran Bey Dadian, ne visait exclusivement que les intérêts arméniens. Ils demandaient qu'une amnistie générale fût proclamée en faveur des Arméniens, qu'un ensemble de réformes particulières fût accordé aux Arméniens ; qu'une indemnité fût décrétée au profit des Arméniens frappés dans les derniers troubles. En un mot, ils semblent n'avoir pensé qu'à eux seuls, et cette politique de partialité et de séparatisme a fait le plus grand tort à leur cause,

tandis que nous confondons le bonheur des Arméniens avec celui de l'Empire ottoman tout entier, et nous n'avons jamais proposé une seule réforme dans l'intérêt exclusif des Turcs. Nous déclarons, au contraire, que nous refuserions plutôt toute mesure de justice et de progrès qui ne serait pas appliquée à tous les Ottomans, sans distinction d'origine et de religion.

On attend à Constantinople le retour de M. de Nélidoff, ambassadeur de Russie, et comme on croit qu'il sera nommé au ministère des affaires étrangères, on lui prépare une réception plus magnifique à la fois et plus humiliante que la conduite qu'on lui avait faite à son départ.

Nous avons reçu la lettre mise à la poste au bureau de la rue Bayen qui contenait un billet de cent francs pour notre propagande. Nous remercions le généreux donateur anonyme.

La dernière lettre que nous venons de recevoir de Constantinople nous annonce quatre-vingt-dix arrestations, parmi lesquelles se trouvent quarante-cinq femmes circassiennes du Palais, le commandant Husein Bey, attaché au bureau de construction militaire, ainsi que le directeur très connu et estimé de l'Ecole Numounéi Tarakhi. La terreur règne partout

Londres 14 décembre. — On télégraphie de Constantinople au *Times* :

Les ambassadeurs sont convaincus que plusieurs Jeunes-Turcs suspects ont subi la torture pendant leur interrogatoire. Quelques-uns ont été pendus.

Les dépêches de source officielle nous annoncent dans ces derniers temps que « le Ministre de l'Intérieur a envoyé aux gouverneurs des ordres formels pour la prompte exécution des réformes. » En effet des circulaires ministérielles parviennent chaque jour, dans les provinces ; ainsi elles se résument toutes en ces deux formules : envoyez le plus d'argent possible par tous les moyens possibles. Compriiez rigoureusement toutes les tentatives d'émancipation libérale. Une dépêche semblable arrivant récemment à Andrinople, fut discutée au Conseil du Vilayet. Un des conseillers Rasim-Bey, ancien député et notable de la contrée, a fait observer que l'application de mesures énergiques aux mouvements de l'opinion libérale apporterait plus de dommage au gouvernement que ces mouvements eux-mêmes. Le gouverneur lui répondit : « Etes-vous donc d'avis qu'il faille laisser libre carrière à la propagande des Jeunes Turcs? — La plus puissante des propagandes est celle qui résulte de notre mauvaise administration et du désordre public, et qui légitime toutes les plaintes de l'opposition. »

La réplique était sévère mais justifiée. Aussi Rasim-Bey, sans autre forme de procès, fut-il envoyé en exil.

Le petit fils de Fuad-Pacha, ancien grand Vizir, nous écrit que le testament politique, publié dernièrement dans la *Revue de Paris* et dont nous avons reproduit certains passages, est bien l'œuvre de son aïeul. Si nous avons exprimé une opinion contraire, c'est que nous nous en étions rapportés aux déclarations contraires dans les journaux de l'époque. Le *Levant Herald*, du 28 septembre 1869, qui avait publié pour la première fois, en français, ce remarquable document et le *Tarakhi* du 4 octobre 1869 où parut la traduction turque, mentionnent tous les deux que le gouvernement a fait savoir officiellement que le véritable auteur du testament n'était pas Fuad-Pacha. De son côté, le prince Malcom Khan, ancien ambassadeur de Perse à Londres,



s'en attribue la paternité. C'est donc entre le prince Malcom et le petit fils du grand Fuad que la question est posée aujourd'hui.

Voici ce que pense de la question d'Orient M. Henry Maret : Toutes les fois qu'on parle de maintenir l'intégrité de l'empire Ottoman, c'est qu'on ne va pas tarder à en prendre un morceau. « Nous suivrons, a dit le ministre des affaires étrangères, la politique traditionnelle de la France, qui est de conserver l'intégrité de l'Empire Ottoman ». C'est exactement ce qu'ont dit ses prédécesseurs à la veille des événements qui ont enlevé successivement à l'Empire la Grèce, l'Egypte, la Bulgarie, la Serbie, la Bosnie, l'Herzégovine, etc. Si l'Empire Ottoman se tire d'affaire cette fois à moins de la Macédoine, c'est qu'il aura de la chance. A force de maintenir son intégrité, il n'aura plus rien du tout ; et je ne désespère pas de vivre assez pour entendre encore un ministre des affaires étrangères proclamer sa décision de maintenir l'intégrité de l'Empire Ottoman, alors qu'un député se lèvera pour lui faire remarquer que, depuis quinze ans, il ne reste plus à cet empire que les yeux pour pleurer.

Cette déclaration folâtre est la seule qu'ait faite M. Hanotaux, et que la Chambre a approuvée, lui attachant probablement l'importance qui convient. Nous sommes donc juste aussi avancés qu'auparavant. Nous savons que toutes les puissances vont s'entendre pour donner de bons conseils au Sultan ; nous savons aussi que le Sultan fera de ces conseils ce qu'il a fait des précédents ; et ce que nous ne savons pas, mais ce que nous aurions voulu savoir, c'est après combien de nouveaux massacres on laissera prendre un nouveau morceau de l'Empire pour mieux conserver son intégrité.

Outre sa brochure pleine de documents parue chez Stock, M. Quillard publie, dans l'*Echo de Paris* du 10 décembre, un article blâmant et critiquant la politique de la France en Orient. Ce n'est point les fautes de cette politique que nous voulons soumettre à nos lecteurs. Toutes les puissances sont tombées dans les mêmes errements et aucune d'elles n'a échappé aux reproches qu'on leur a faits. Nous en extrayons le passage le plus saillant qui attaque très justement les financiers véreux et cosmopolites. C'est là un point sur lequel nous avons longuement insisté dans nos précédents numéros, et depuis longtemps nous flétrissons la conduite mesquine de quelques agents guidés par les viles préoccupations mercantiles. Nous constatons de nouveau avec plaisir que tous ceux des Français qui ont visité notre pays se rallient à nos idées pour combattre les nuisibles parasites qui sucent le sang du faible Empire.

Nous félicitons M. Quillard qui s'est très exactement rendu compte de la déplorable situation en Orient, d'avoir exprimé sans prévention, sans préjugé, ces choses intéressantes.

« Depuis trois mois, dit-il Constantinople a l'aspect d'une ville morte où passent seulement les lourdes patrouilles des soldats

dépenaillés et les faces hagardes des Kurdes toujours menaçants. Les palais des ambassades et les maisons des attachés militaires sont gardés par les marins des stationnaires. Rien n'a été fait pour défendre les particuliers. La sécurité publique et la paix de l'Europe sont à la merci de la première bagarre sanglante que feront naître le mécontentement légitime de toute la population ottomane (les Turcs sont aussi durement écrasés que les chrétiens) ou les intrigues d'une puissance malintentionnée, s'il s'en trouve.

« Ce jour-là, sans qu'on ait rien fait pour les défendre éventuellement, nos compatriotes seront massacrés ; et nous nous trouverons dans un brusque réveil en face de la grande guerre européenne, avec l'alternative également désastreuse de soutenir, au mépris de l'humanité, l'exécrable pouvoir du Palais ou de laisser se produire, avec tous les hasards qu'il comporte, le démembrement prématuré de l'Empire ottoman.

« En attendant cette date qu'il est impossible de fixer, mais qui peut être très prochaine, la direction impérieusement donnée depuis dix-huit mois à notre diplomatie par son chef responsable ne profite ni à la France, dont l'autorité décroît en Orient, ni à la Turquie, dont la ruine s'aggrave de jour en jour. Elle profite uniquement aux financiers cosmopolites qui se sont abattus sur l'Empire ottoman, qui en épuisent les suprêmes ressources et abusent du malheur des temps pour lui faire des avances à des taux de plus en plus usuraires. »

M. Ernest Bérard, député, répond dans le *Petit Moniteur*, à un article de M. Albert Leroy. Voici les passages importants :

Vous me concédez — avec une légère pointe d'ironie, avouez-le — que je connais les Turcs, mais en « hôte de passage ». Or, ce sont des années que j'ai passées auprès d'eux ; vingt fois, pendant des mois, j'ai vécu au contact de cette race qui, si elle a gardé toute la fougue brutale des peuples primitifs, en a conservé aussi toutes les vertus. Vous vous plaignez de sa superbe ; manque-t-elle de grandeur ? Son honnêteté, vous la qualifiez d'apathie et d'inaptitude commerciale, soit. Mais, en existe-t-elle moins ? Et de plus, avons-nous le droit d'en présumer des causes défavorables ? J'ai affirmé que les Turcs avaient fait aux Arméniens une place plus large encore que celle qu'ils avaient retenue pour eux-mêmes ; or, cela, pouvez-vous le nier ?

Je termine ; mais, auparavant, je constate que le seul point sur lequel nous puissions vraiment nous dire en complet désaccord d'idées, n'avaient même pas été effleuré par moi. La Dislocation, l'anéantissement de la Turquie me paraît chose si chimérique et si grosse de conséquences, que je ne veux même pas l'envisager. J'ai l'intime conviction que la Turquie est nécessaire à l'équilibre européen, et pour utiliser à mon tour, l'image dont vous vous êtes si magistralement servi ; je craindrais que le vieil arbre n'écrasât, en sa chute, les audacieux bucherons qui le voudraient abattre.

*Le journal est vendu sous l'Odéon ; au 38, rue Monge, et au kiosque n° 10, Mme Lelong, boulevard des Capucines, en face du Grand Café, — M. Bichara, 42 bis, boulevard Bonne-Nouvelle.*

*Le Gérant : HOUILLON.*
