# Supplementary material
Source: Research Square preprint supplement (doi:10.21203/rs.3.rs-9653111/v1)
Supplement: Supplementary file 5 [file Meşveret\1367_a027.pdf › Primary Sources/Meşveret\1367_a027.pdf]

REDACTION

48, Rue Monge, 48

PARIS

# MECHVERET

Organe de la Jeune Turquie  
PUBLIÉ SOUS LA DIRECTION DE **Ahmed RIZA**

PARAISANT 2 FOIS PAR MOIS

Prix du Numéro

10 CENTIMES

« *Ordre et Progrès* »

## LE SULTAN & LA RUSSIE

Visites de souverains, entrevues de diplomates, discours de ministres, articles inspirés, conférences d'ambassadeurs, — il n'en est encore rien sorti de sérieux.

Appliquée sans sincérité et d'ailleurs sans contrôle, la prétendue amnistie laisse toujours une foule d'innocents privés de liberté.

L'exil, la torture, les persécutions de toute sorte atteignent de nouveau de nombreux musulmans.

La démission retentissante et motivée de Bertram-Efendi réduit à néant cette fantasmagorie de budget, inventée pour tromper une fois de plus l'Europe.

La commission des fonctionnaires civils est une vaste fumisterie. Elle ne saurait du reste offrir aucune garantie d'impartialité, alors même qu'elle deviendrait une réalité, attendu qu'elle devra siéger au Palais et être placée sous la direction suprême du Sultan. Or, son mandat apparent eût consisté à contrôler et, au besoin, à renverser les nominations et les destitutions ordonnées par ce même Sultan.

En attendant, de grandes puissances s'attachent à des incidents sans doute douloureux, mais secondaires, tels que l'affaire Salvatore, l'exil d'un Italien à Trébizonde, etc., tandis que des hécatombes innombrables ne provoquent aucune démarche efficace.

Habitué aux observations violentes et même aux menaces, Abdul-Hamid les jette au panier, car elles sont dépourvues de toute sanction.

L'Europe y laisse sa dignité et les victimes s'accumulent : Voilà tout.

Mais la diplomatie délibère, sans trouver, il est vrai, après si longtemps, aucun remède, pas même un palliatif, alors que les lamentations et les gémissements se perdent dans le lointain.

La Russie savait bien couvrir de fleurs M. Gladstone lorsqu'il poursuivait, en 1876, sa campagne atrociste ; mais c'est qu'à cette époque, l'illustre vétéran servait, sans trop s'en apercevoir, les intérêts d'une politique perfide.

Aujourd'hui, M. Gladstone, mieux éclairé, s'attaque au Sultan seul, unique cause de tous les maux. Il n'enveloppe plus, dans une même réprobation et dans une même responsabilité, les peuples orientaux. Or ceci ne convient guère à la Russie, protectrice attitrée d'Abdul-Hamid, le grand démolisseur de l'Empire, le grand fossoyeur de ses sujets. C'est pourquoi les organes russes, oubliant les atrocités actuelles, accablent de reproches le même M. Gladstone qu'ils glorifiaient jadis ; c'est pourquoi aussi on essaie d'organiser, autour de ses lettres et discours, la conspiration du silence.

La partie est engagée entre la Russie, qui recherche toujours la dissolution graduelle de la Turquie, et l'opinion publique, révoltée par la barbarie d'un prince sanguinaire. Si Abdul Hamid est maintenu au pouvoir, rien n'empêchera de nouvelles scènes d'horreur, comme rien ne les avait prévenues jusqu'ici. Aucun argument, aucune considération ne sauraient prévaloir contre ce fait brutal.

Les interminables négociations dans lesquelles on fourvoie les cabinets ont invariablement pour but de gagner du temps et de masquer de ténébreux desseins par des semblants de mesures et de notes, dont l'effet est détruit d'avance par certaines assurances mystérieuses données au Sultan.

Dans ces conditions, au lieu d'accepter le rôle de dupe ou de complice, l'Europe ferait mieux de s'abstenir et de laisser aux événements suivre leur cours fatal. Entretenir des illusions dans l'esprit de populations infortunées, tandis que, même en Crète, la diplomatie n'a pas su avoir raison de la mauvaise foi légendaire d'Abdul Hamid ; tolérer, d'une part, les infamies de Yildiz-Kiosk, et, de l'autre, rester impassible en présence des armements de la Bulgarie, de la Grèce, de la Serbie, du Monténégro, de la Roumanie, — c'est assumer une immense responsabilité, c'est accumuler tous les éléments d'explosion, c'est préparer enfin des catastrophes qui seraient de nature à provoquer un ébranlement général.

Ne fût-ce donc que par égoïsme, ne fût-ce que par intérêt personnel, celles des puissances qui sont intéressées au maintien de la paix devraient travailler au renversement du Sultan, qui, seul, entretient le chaos en Orient. Car si aucune solution sérieuse et équitable des difficultés pendantes ne survient avant le printemps, les fameuses *sopas*, les yatagans et les fusils recommenceront leur œuvre de destruction et la lutte de convoitise entre petits états, engendrerait des luttes autrement redoutables entre grandes puissances.

G. UMID.

## L'ATTITUDE DU SULTAN

Les ambassadeurs ont maille à partir avec le Sultan. Voyant qu'ils n'arrivaient pas à le convaincre séparément de la nécessité de faire des réformes, ils se sont groupés dans l'espoir que cette manifestation imposante aura quelque résultat ; mais Abdul Hamid ne s'est pas laissé intimider, il est resté ferme à son poste ; tout au plus a-t-il daigné condescendre jusqu'à recommander à ses généraux de ne plus braquer leurs canons sur le faubourg de Péra où se trouvent les diverses ambassades.

Devant cet insuccès manifesté de leurs efforts, les ambassadeurs aux abois ont appelé à leur secours leur collègue M. de Nélidoff qui se trouvait en Russie et lui ont confié la mission d'amener le Sultan à de meilleurs sentiments. M. de Nélidoff n'a pas hésité et a engagé avec S. M. un dialogue qui n'est pas près d'être terminé. Il lui a d'abord donné le conseil de ne point toucher aux gages des créanciers et il vient, paraît-il, d'adresser au Sultan une seconde note au sujet des réformes. Or, le mot de réforme exaspère Abdul Hamid ; car il redoute la grande réforme, celle du rétablissement de la Constitution. Et alors il regimbe. M. de Nélidoff a beau le rassurer et lui affirmer qu'il est avec lui pour repousser cette charte libérale, le Sultan continue à trembler de tous ses membres devant l'image d'un Parlement. Ses frayeurs ne sont pas justifiées ; car le futur Parlement respectera les droits et les prérogatives du trône et ne fera, en somme, que rétablir la légalité et l'ordre dans l'empire. Mais si la raison du Sultan est capable de comprendre les avantages d'un pareil changement, son orgueil s'oppose à la réalisation de tout acte qui pourrait le mettre dans la bonne voie. Il ne sait qu'une chose, tromper son monde. C'est sa passion et sa manie.

Toutefois, les ambassadeurs sont sur leur garde ; ils tiennent bon, du moins en apparence, car il y a des dessous. Or, il suffit que le Sultan soupçonne la possibilité d'une divergence d'op-



nion entre les puissances pour qu'il refuse obstinément de se prêter à aucun arrangement.

Il fait en ce moment des démarches répétées auprès des ambassadeurs pour les diviser ; il en fait également auprès des ministres, notamment auprès de M. Hanotaux qui, malgré de vieilles bonnes relations a tenu en dernier lieu Munir Bey, représentant du Sultan à Paris, un langage sévère en lui recommandant expressément de le communiquer à S. M.

Mais le Sultan n'ignorerait rien des dispositions des puissances qu'il n'en persisterait pas moins dans son attitude. Quand il fera des concessions, soyez persuadé que c'est avec l'arrière-pensée de les reprendre dès que les circonstances le permettront. Les ambassadeurs comptent sur le manque d'argent pour avoir raison de ses résistances ; mais outre que le Sultan a amassé dans les vingt dernières années d'immenses trésors, on n'ignore pas dans les hautes sphères diplomatiques que le Palais regorge des dépouilles des malheureux Arméniens massacrés ou simplement frustrés de leurs biens. Abdul Hamid et son entourage ont eu la meilleure part du butin, et si les victimes de ces spoliations meurent aujourd'hui de faim, les bourreaux sont repus ! Aussi le Sultan peut attendre patiemment que les combinaisons de la diplomatie se soient effondrées.

Mais, dira-t-on, la Russie ira jusqu'au bout et occupera l'Anatolie. Dans ce cas, l'Autriche s'empressera d'occuper la Macédoine et alors la rivalité de l'Autriche et de la Russie suffirait seule à remettre le Sultan en position et à préserver la Turquie d'un partage prématuré. L'Europe a affaire à un fin rusé qui, un jour de réception, disait à son premier chambellan, après le départ de chaque ambassadeur : « Voilà un J... f... (l'expression dont s'est servi le Sultan était bien plus corsée) que j'ai encore mis dedans ». On comprend que d'un tel homme il n'y a rien autre chose à attendre que des fourberies, des trucs, des intrigues et des mensonges.

Si Abdul Hamid est un fléau pour ses peuples, il est à coup sûr un châtimeur pour l'Europe, qu'il a couverte de honte et d'opprobre. Le châtimeur durera longtemps, plus longtemps qu'on ne le croit, et nous verrons surgir dans le domaine des faits plus d'un exemple terrifiant dont on dira : « C'est la revanche de la Justice méconnue ».

Sur ce point, notre conviction n'a jamais varié ; les plus punis ne seront pas ceux qui ont souffert, mais ceux qui souffriront. Les iniquités, quelles qu'elles soient, ainsi que les complicités, entraînent après elles de lourdes responsabilités. L'attitude, tantôt arrogante, tantôt suppliante, toujours perfide, du Sultan, ainsi que les hésitations de l'Europe, ne sont pas faites pour atténuer ces responsabilités.

L'ère des réparations salutaires ne commencera, à notre avis, que lorsqu'Abdul Hamid sera tombé de son trône. Jusque-là on patagera et l'anarchie ira en progressant.

Pour obéir aux injonctions de l'Europe, le Sultan lui demande de l'argent à quelque taux que ce soit ; mais lorsqu'il aura cet argent, son premier soin sera de ne rien faire de ce qu'il aura promis. L'Europe ne l'ignore pas. Toutefois, ceux qui ont intérêt à lancer l'emprunt poussent la diplomatie européenne à faciliter la chose, soit en garantissant l'emprunt projeté, soit en obtenant de la Porte, par l'intermédiaire des gouvernements, certains monopoles qui aliéneraient les dernières ressources dont l'Empire pourrait disposer à l'avenir. Pas d'argent, pas de réformes ! C'est le langage qu'Abdul Hamid tient à tous ceux qui l'approchent.

Après tout, il a peut-être raison. Il a été tellement gâté par les puissances qu'il peut tout se permettre à leur égard, et nous ne serions pas surpris de voir réussir la combinaison d'un gigantesque emprunt où il y aurait, comme on dit vulgairement, à boire et à manger.

L'habileté d'Abdul Hamid a toujours consisté à marcher dans le sens des intérêts financiers auxquels il sacrifie les intérêts de l'Etat, sa dignité et son indépendance. De cette façon, il est sûr d'être soutenu et sa devise est celle-ci : « Après moi le déluge ».

HALIL GANEM.

## COMBINAISONS POLITICO-FINANCIÈRES

Le gouvernement du Sultan a enfin apporté, d'après les avis officiels, la lumière et l'ordre dans le dédale des finances. Il a publié un projet de budget pour l'année financière qui commence le 1<sup>er</sup> mars (vieux style) et où, par une grâce magique, on a retrouvé non seulement l'équilibre du budget, mais aussi des excédents merveilleux. Les journaux officiels et tous les intéressés applaudissent à cette victoire. L'Europe peut donc se féliciter et apporter, en toute sûreté, son argent à la Turquie. Le but du Sultan en publiant ce budget éblouissant est donc atteint, puisqu'il aboutit à la réalisation de son idée de derrière la tête : l'emprunt.

Ce projet de budget qui n'est, bien entendu, que sur le papier, présente, grâce à des réductions fictives et illusoire, un excédent prévu de 82.000 liv. turques. En augmentant la taxe de certains revenus, tels que celui de la dîme et de l'impôt sur les moutons, on espère pousser les recettes au chiffre fabuleux de 18.500.000 l. t. ; et, d'autre part, en faisant une réduction de 1.000.000 de l. t. sur le budget de la guerre et certaines autres économies dans différentes administrations, on compte également restreindre considérablement les dépenses.

L'aggravation d'une surtaxe venant peser sur une population terriblement pressurée déjà nous paraît, non seulement difficile à réaliser, mais aussi cruelle et peu humaine. Actuellement, à la suite de la mauvaise administration de ces dernières années, l'Empire ottoman — et ce n'est un secret pour personne — est aux trois quarts ruiné. D'autre part, la population jeune et active se trouvant sous les drapeaux, il ne reste dans les campagnes que les vieillards. Ceux-ci vivant dans une perpétuelle crainte du lendemain, se sont abstenus de faire des semailles au-delà de leurs besoins personnels. En présence de cet état de fait, comment peut-on songer à frapper utilement d'un impôt les malheureux cultivateurs ?

Le budget a été dressé sur la moyenne des dernières années. Or, depuis quelque temps de tels événements se sont passés en Turquie que le commerce, l'industrie et l'agriculture ont subi un arrêt qui se traduit par une diminution considérable sur les recettes des douanes. Donc, tabler sur les dernières années pour dresser un budget, c'est aller au-devant de l'erreur et des mécomptes.

On nous laisse ignorer les détails de cet admirable budget. Et cependant, nous savons qu'il existe une foule de créances sur l'Etat. Les fournisseurs du 3<sup>e</sup> corps d'armée, entre autres, réclament plus de 120.000 l. t. (35.000 l. t. pour Salonique et 85.000 l. t. pour Kossova). Nous serions curieux de connaître aussi sous quelle rubrique on a classé les appointements donnés aux espions et les autres dépenses de ce genre concernant la presse et la police particulière de Sa Majesté.

Un million de livres turques sera économisé, dit-on, sur le budget de la guerre. Personne n'ignore l'état déplorable où se trouve l'armée ; c'est un fait constaté par les étrangers eux-mêmes que les simples soldats, voire même les officiers, sont réduits littéralement à la mendicité. Un corps d'armée qui devait recevoir pour l'habillement, d'après les décisions du gouvernement lui-même, 11.000.000 de piastres, n'a reçu l'année dernière que 2.000.000 seulement. Les soldats portent encore en plein hiver leurs vêtements d'été, déjà usés jusqu'à la corde. Que peut-on extraire de plus de ces malheureux si terriblement atteints ?

Porter l'économie proportionnelle dans les diverses administrations sur des traitements qui restent depuis longtemps impayés, paraît dépasser l'extravagance. Ce projet de budget est à ce point ridicule, que Bertram Efendi a refusé le poste de sous-secrétaire au ministère des finances, en expliquant dans sa lettre officielle au Palais, que les données sur lesquelles est basé ce budget ne lui semblent pas assez précises. D'autre part, Sir Edgard Vincent, directeur de la Banque Ottomane, dans un rapport qu'il a présenté au Sultan, évalue les recettes annuelles de la Turquie à 17.600.000 l. t., et les dépenses à 18.600.000 ;



ce qui donne un déficit annuel de 1.000.000 l. t. Or, le nouveau budget en projet présente, au contraire, 1.000.000 d'excédent basé, en outre, sur 18.500.000 l. t. de recettes. Entre les prévisions de Sir Edgard Vincent et celles du Palais, l'Europe saura auxquelles des deux elle doit prêter créance.

Le pays est pressuré, cela ne fait pas de doute. Le Sultan, de son côté, manifeste des appétits féroces. Pour les satisfaire, il a décrété dernièrement un impôt forcé sous forme d'une souscription nationale organisée, dit-on, au profit des institutions militaires. Cette souscription n'a produit nominale que la minime somme de 15.000 l. t. La souscription nationale qui avait été ouverte après la guerre, c'est-à-dire à l'époque où la nation était la plus obérée, produisit 50.000.000 l. t., lesquelles furent effectivement versées, au lieu que les 15.000 l. t. actuellement souscrites ne le sont que d'une façon fictive ; car elle n'est composée que de l'abandon de leurs arriérés fait par les fonctionnaires forcés et contraints. Quant à la population, elle s'est refusée obstinément à toute souscription. La ville d'Angora a été taxée, comme aux enchères, à 26.000 l. t. ; or, par une de ces grâces d'Etat incompréhensibles, toute la population non musulmane, les soldats, les femmes, les corporations religieuses ayant été exemptés de cet impôt forcé, tout le poids retombe sur quelques malheureux dont on ne pourra guère rien tirer. Beaucoup d'autres villes sont dans le même cas.

Comment sera employé tout cet argent que le Sultan quémande ? Une partie sera allouée aux frais que nécessiteront les mariages prochains des princesses, ses filles. Une autre à la construction des petits palais destinés au premier secrétaire et à des favoris ; le reste à l'entretien de son armée d'espions.

Depuis vingt ans, le gouvernement n'a jamais employé la moindre part des revenus à leur destination légitime. Il avait établi un nouvel impôt au profit de l'instruction publique. Le produit n'en a servi qu'à entretenir l'ignorance, le fanatisme et à étouffer toute sorte de libertés et de progrès. Aucun des engagements successifs qu'il avait solennellement pris vis-à-vis des étrangers et de ses sujets n'a été tenu. Qu'a-t-il fait de tout cet argent que lui ont confié le peuple ottoman et l'épargne étrangère ? Il l'a follement et criminellement dilapidé, ne laissant aucun souvenir durable, aucune trace d'une œuvre civilisatrice. Non content de condamner ses sujets à la misère, il a vendu à des syndicats financiers étrangers toutes les sources de richesse du pays. Il serait trop long de parler ici des diverses combinaisons qui ont eu lieu entre la Liste civile, la Banque Ottomane et la Dette publique. Nous connaissons les personnages qui se sont enrichis de ces opérations frauduleuses.

Comme un joueur aux abois, Abdul Hamid, en aliénant un à un tous les principaux revenus de l'Etat, a vendu pour ainsi dire la Patrie. Aujourd'hui nous sommes de simples locataires dans un pays dont les plus beaux revenus ne nous appartiennent plus.

Malgré cela, on essaie d'établir sur le dos du peuple un nouvel emprunt, et l'Europe, alléchée par le gain, s'y prête volontiers, alors qu'elle se refuse à demander les réformes fondamentales les plus urgentes.

Les personnes intéressées dans cette opération financière, y compris certains journaux, inventent des nouvelles et proposent des solutions plus préjudiciables et plus nuisibles les unes que les autres. Ainsi, on raconte que la population turque et surtout les fonctionnaires ottomans sont sur le point de se révolter et de faire un nouveau massacre de chrétiens et d'étrangers si on ne leur paie pas leurs nombreux arriérés. Pour éviter ce danger et des complications à l'Europe on conclut à la nécessité d'un emprunt. On pousse jusqu'à la calomnie la plus odieuse en disant que plusieurs milliers d'employés privés de leurs traitements et de commerçants ruinés souhaitent une intervention étrangère. On fait enfin croire à l'Europe que, si on ne donne pas de l'argent au Sultan, celui-ci finira par toucher aux revenus destinés au service de la Dette publique, et l'on montre la Russie comme un épouvantail en la chargeant de présenter à la Porte une note comminatoire déclarant que le gouvernement russe s'associerait, le cas échéant, aux autres puissances pour protéger les gages des

créanciers européens contre les entreprises du gouvernement turc.

Voici donc que le gouvernement russe s'annonce comme le sauveur et le protecteur des syndicats financiers. Désormais, ce gouvernement est tout-puissant et même omnipotent en Orient.

Cette toute-puissance lui a été octroyée par les syndicats afin d'attirer davantage les sympathies des financiers vers la Russie. Les uns et les autres se prêtent ainsi la main, en se faisant mutuellement le jeu réciproque, au grand préjudice de la diplomatie européenne qui sera forcée de se soumettre à ces deux grandes forces qui mènent actuellement la politique orientale : la Russie et la finance.

AHMED RIZA.

## Le « New-York Herald »

A la suite des attaques dont notre parti et quelques-uns de ses chefs ont été injustement l'objet de la part du *New-York Herald*, Halil Ganem Efendi avait adressé à ce journal la lettre rectificative que nous reproduisons ci-dessous.

Le *New-York Herald* parle souvent de son impartialité, de son désir de faire connaître toutes les faces des questions intéressant le public. Toutefois en omettant de publier la lettre précitée, il a donné une preuve du peu d'empressement qu'il apporte à pratiquer, en fait, les nobles intentions qu'il proclame en théorie.

Chose curieuse, M. Gordon Bennett, citoyen d'un grand pays libre, propriétaire d'une feuille considérable, possesseur d'une fortune énorme, en mesure, dès lors, de faire beaucoup de bien aux opprimés, a préféré choisir le rôle de défenseur d'un homme comme Abdul Hamid, dont les crimes, les mauvaises actions, la tyrannie, les procédés arbitraires ne sont plus à démontrer. M. Gordon Bennett doit évidemment être un personnage excentrique et d'esprit paradoxal : on ne s'expliquerait pas sans ça la tendre sollicitude que lui inspire le souverain usurpateur dont la conduite est stigmatisée, non seulement par la diplomatie, la presse, la société européennes, mais aussi par tous les journaux et les revues qui se publient aux Etats-Unis aussi bien que par M. Cleveland, M. Olney, secrétaire d'Etat, M. Terrell, ministre des Etats-Unis à Constantinople, et par une infinité de penseurs Américains.

Voici la lettre de H. Ganem Efendi :

Votre correspondant spécial de Constantinople vous envoie, au sujet du parti de la Jeune Turquie, quelques renseignements provenant, assure-t-il, de la plus haute source officielle qui soit en Turquie. Ceci devrait déjà rendre ces renseignements suspects à vos yeux ; mais passons !

Les chefs de notre parti à l'étranger, déclare votre correspondant, seraient au nombre d'une demi-douzaine « d'aventuriers et d'anarchistes », ennemis des institutions civilisées existantes (*sic*) et fugitifs de justice (?) Permettez moi, Monsieur, de réfuter ces allégations fausses de tous points. L'un, dit-il, est un Docteur maronite de Syrie que votre correspondant comprend dans la catégorie des aventuriers et des anarchistes ; je ne dirai qu'un mot, c'est que ce maronite est un homme d'ordre et de progrès, ancien député au Parlement ottoman, ancien rédacteur au journal des *Débats* et à d'autres feuilles, honorablement connues. Le seul reproche qu'on pourrait lui adresser c'est de détester le despotisme presque autant qu'un citoyen de la libre Amérique, ce qui n'autorise pas votre honorable correspondant à le désigner comme un aventurier et un anarchiste. Il n'existe pas parmi nous de maronite qui se soit converti à l'islamisme.

Le « *Caucasien* réfugié en Turquie » est venu à Constantinople à l'âge de douze ans ; il y a fait ses études et a donné une preuve éclatante de son patriotisme en abandonnant, il y a un an, un poste qui lui rapportait 30.000 francs. Il a quitté sa famille pour venir en Europe soutenir la cause commune. D'une répu-



tation sans tache, écrivain distingué, publiciste et professeur.

« Le Métis fils d'un Musulman et d'une Allemande » est l'un des chefs de notre parti ; c'est un homme intègre qui n'est pas plus métis que vous et moi. Les fils de musulmans et de chrétiennes, ne sont pas rares en Turquie. On en trouve parmi les sultans et les princes de la maison d'Osman, comme parmi les pachas. Vous n'êtes pas sans avoir entendu parler des Roxelanes, des Piaffa, des Kourem, de toutes ces Vénitiennes, Françaises et Russes que nos souverains ont épousées. Il n'y aurait d'ailleurs aucun mal à être métis, mais ce n'est pas le cas.

A cet aventurier, comme l'appelle votre honorable correspondant, le Sultan actuel n'a pas hésité, du reste, à maintes reprises à offrir des situations convenables pour ne pas dire brillantes. Comment votre correspondant ayant à parler de cet honnête homme dont je défends la réputation n'a-t-il pas hésité sur le témoignage de ses ennemis avérés à l'accuser de malversations. C'est la première fois que de la haute source où votre correspondant a puisé ses renseignements on laisse tomber pareille calomnie. On traiterait cette accusation mensongère avec le plus profond mépris si votre journal très répandu ne s'en était emparé pour la faire circuler dans le monde avec les autres assertions contenues dans la correspondance précitée. Voilà pourquoi, Monsieur, vous nous devez une juste et légitime réparation. Avec la loyauté qui vous caractérise vous ne refuserez certainement pas de publier cette rectification dans vos colonnes et j'espère, en outre, que vous la ferez traduire en anglais par votre respectable personnel pour rendre la réparation plus complète, ceci sous réserve de nos droits. La preuve qu'on nous a calomniés indignement c'est que nous n'avons jamais été des anarchistes, pas plus que nous ne sommes des aventuriers. Veuillez vous reporter, Monsieur, à notre programme que nous avons souvent publié et qui est d'une correction et d'une modération parfaites.

« La plus haute source » a également induit en erreur votre correspondant en prétendant que nous sommes des fugitifs de justice (?) — à moins qu'on n'ait voulu faire allusion aux décrets de proscription et d'exil prononcés contre nous et à la farce lugubre de la condamnation à mort de quelques-uns d'entre nous et de la confiscation de nos biens. Ces mesures, à la fois iniques et grotesques, ont été prises l'année dernière, au mépris de toutes les lois, pour nous punir d'avoir réclamé, par la voie de la presse, l'exécution des engagements solennels contractés par Abdul Hamid vis-à-vis de ses peuples.

A vrai dire, nos écrits et nos actes sont là pour convaincre les plus incrédules que si nous avons cherché à orienter nos compatriotes vers le progrès par les voies de la justice et de la légalité, ceux qui du haut de Yildiz nous ont calomniés, ont cherché, eux, à pousser notre infortuné pays vers l'abîme par la violation systématique des plus solennelles promesses et par des crimes sanguinaires que l'humanité réprouve. C'est en vain que l'on essaie de discréditer notre cause, qui est celle de la justice et de la liberté, en insinuant, ce qui est complètement faux, que des étrangers dirigent notre mouvement. Notre cause est puissante autant qu'elle est légitime, parce qu'elle embrasse les droits de tous les peuples orientaux, sans distinction de race ni de religion. Si notre doctrine n'avait pas eu de si profondes racines dans le peuple, on ne la redouterait pas au point de faire arrêter et punir ceux qui lisent notre « littérature prohibée ». La chose nous était connue, sans doute, mais nous n'en prenons pas moins acte de l'aveu échappé à la « source officielle » à ce sujet.

Dire après cela qu'aucun Ottoman n'est arrêté ni condamné, comme le seraient un nihiliste en Russie ou un anarchiste en France, c'est vouloir établir une comparaison audacieuse, en tous cas imméritée. Entre ce qui se passe dans ces deux pays, où les lois n'ont pas perdu leur force et où la justice est respectée, et les épouvantables horreurs qui sous le règne d'Abdul Hamid ont transformé la Turquie en un vaste charnier, les contemporains voient et l'Histoire racontera de quelle façon le Sultan actuel « a sauvé son pays » et « assuré un avenir heureux aux Osmanlis ». Mais puisque la « source officielle » ajoute qu'il « est spécialement aimé de ses sujets, qui le considèrent comme un sauveur, et que sa popularité surpasse celle de ses prédécesseurs » com-

ment se fait-il donc qu'il habite un camp retranché et qu'il n'en sorte ni pour voyager, ni tout au moins pour circuler dans sa capitale, comme le faisaient ses prédécesseurs ?

Cette situation est d'autant plus incompréhensible, que d'après la « plus haute source » il n'y a en Turquie ni de partis d'opposition ni de sociétés révolutionnaires.

Il paraîtrait d'ailleurs, au dire de votre correspondant, que ceux-là seuls parmi les Arméniens et les Musulmans auraient été tués qui étaient ennemis déclarés de l'ordre, ou anarchistes, porteurs de bombes, de revolvers et de poignards, affirmation audacieuse !

Nous avions, pour notre part, cru jusqu'ici que c'étaient au contraire les gens de cette espèce qui avaient obtenu un sauf-conduit. Que si l'on veut maintenant accréditer cette nouvelle version, on se trouvera en présence du dilemme suivant :

Ou il n'y avait pas d'ennemis de l'ordre en Turquie, et les égorgés des deux sexes et de tout âge étaient des innocents ; ou bien c'étaient des ennemis de l'ordre, et dans ce cas les révolutionnaires et les mécontents devaient être fort nombreux dans l'Empire ottoman, puisque le chiffre de ceux qui ont été massacrés s'élève à plus de cent cinquante mille.

Voilà ce que j'avais à répondre pour la défense de la Jeune Turquie, à laquelle j'ai l'honneur d'appartenir. Il est véritablement surprenant que nos adversaires nous contestent le droit de nous réclamer de Midhat Pacha, qu'ils ont fait assassiner dans son exil, et de suivre sa politique ; mais de qui donc nous réclamerions-nous ? Est-ce des assassins qui sont retranchés à Yildiz, comme des fauves dans leur repaire, ou du despote qui les protège et pourvoit à leur entretien ?

Je compte sur votre impartialité et votre courtoisie pour l'insertion de cette lettre dans un de vos plus prochains numéros.

## LA RUSSIE ET LA TURQUIE

En 1866 les Positivistes anglais, se groupant pour la première fois, publièrent un volume d'essai sur la « Politique internationale ». Dès cette époque, ils ne cessaient de déplorer l'influence toujours croissante de la Russie sur le gouvernement ottoman. De nouveau, dans la *Revue Positiviste* de décembre 1896, ils s'élèvent contre l'ingérence du Russe dans la politique intérieure de la Turquie.

Nous croyons répondre aux désirs des lecteurs du *Mechveret*, en leur donnant un extrait du remarquable article, tout d'actualité, dû à la plume d'Edward Spencer Beesly, le très sympathique et savant directeur de la *Positivist Review* :

Dans le recueil intitulé la « *Politique Internationale* » nous affirmons que la *République Occidentale* ou simplement l'*Occident*, c'est-à-dire cette partie de l'Europe placée directement ou indirectement sous la domination de l'empire Romain et de l'Eglise Catholique : les Français, Italiens, Espagnols, les contrées des Anglo-Celtes et des Teutons ainsi que leurs descendants dans les autres parties du monde, constituent pour ainsi dire, réunis, le chef et le guide de l'Humanité ; que dans cette suzeraineté la Russie n'avait aucune part naturelle, parce que, en raison de son histoire, elle y était impropre, même opposée, et que, tandis qu'une action combinée était indispensable, elle ne pourrait jamais être établie avec sécurité sur les principes des nationalités ou d'équilibre européen ordinairement invoqués ; que le bien de l'humanité, en général, était la seule règle de morale qu'on pût s'attendre à voir accueillie d'une manière efficace et que l'acceptation de ce principe ne saurait être obtenue que par une régénération de l'opinion publique.

Nous ajoutons que toute tentative de changement basée sur un autre principe, surtout celui des nationalités, serait nuisible et que par conséquent une sage politique devait se limiter à conserver le *statu quo* jusqu'à ce que l'opinion fût disposée à accepter de meilleures institutions.

Comme début et garantie de cet arrangement provisoire, nous pensions que l'Angleterre et la France devaient en venir à un



accord sérieux sur les principaux points d'une politique commune qui leur assurait la paix et ferait de ces deux nations un exemple politique, pacifique et désintéressé. Nous n'ignorions pas l'existence de nombreuses injustices en Europe, ne cherchions-nous pas à en diminuer l'importance, mais nous étions convaincus que toute tentative ayant pour but de redresser ces torts par les armes n'aboutirait qu'aux pires calamités. Nous citions trois cas comme exemples : la Pologne, les peuples des Balkans et la Vénétie. Nos sympathies étaient allées droit à ces populations opprimées, nous les considérions comme appelées à jouir de la liberté à laquelle elles avaient droit, dont on les spoliait, bien que nous fussions contraints de blâmer toute action en leur faveur qui aurait eu pour résultat d'entraîner l'Europe dans une guerre désastreuse.

Dans la *Politique Internationale* nous admettions que le concert occidental devait, s'il le fallait, déclarer la guerre dans le cas d'une atteinte au *statu quo* et nous visions plus particulièrement une action de la Russie ; nous blâmions toute tentative qui pourrait être faite dans le but de retrancher une partie quelconque du territoire russe, quelque contestable que pût en être le droit de possession, mais nous soutenions énergiquement que les puissances occidentales, sans exception, devaient se tenir sur leurs gardes pour réprimer immédiatement chez cette théocratie orientale, toute tentative d'extension en Europe, non seulement à cause du danger que présente une annexion en général, mais parce que le gouvernement russe, aussi arriéré en politique qu'en religion, ne pouvait être qu'humiliant et dégradant pour tout pays d'Europe auquel il s'imposerait.

Malheureusement pour les états voisins de la Russie, ils n'ont jamais été livrés à eux-mêmes. Sa politique constante les empêchait de faire des réformes chez eux à seule fin que la corruption et une mauvaise forme de gouvernement les fît tomber plus aisément entre ses mains. Il y a cent ans, ce fut grâce à cette politique poursuivie de la façon la plus impudente qu'elle se saisit de la Pologne, nation occidentale de beaucoup supérieure à elle comme civilisation. C'est cette même politique qu'elle a constamment poursuivie vis-à-vis de la Turquie et plus cyniquement aujourd'hui que jamais. Si durant la dernière moitié du siècle, ses efforts n'ont pas été couronnés de succès, c'est à cause de l'opposition de l'Angleterre, de la France et de l'Autriche. Aucune de ces puissances pourtant n'a agi avec désintéressement et par conséquent, leur protection n'a guère obtenu de résultats moins corrupteurs que la politique agressive de la Russie.

Le meilleur remède pour l'Empire ottoman et ses sujets eût été de les laisser seuls, c'est-à-dire à eux-mêmes durant ces trente dernières années ; nul doute qu'ils n'eussent trouvé et appliqué les réformes nécessaires. Par la force ou la fraude, les menées corruptrices et désorganisatrices de la Russie contre la Turquie ont été continuées sans relâche durant ces derniers temps. Par deux fois elle pensa que le moment propice de bondir sur sa proie était enfin arrivé ; en ces deux occasions elle fut égarée par les propos insensés de quelques personnages irresponsables anglais.

En 1854, elle fut repoussée par la France, l'Angleterre, le Piémont et l'Autriche. La seconde fois, c'était en 1877 ; la Russie était enhardie par l'affaiblissement de la France. Les libéraux anglais, en disponibilité d'emploi, invitaient le Tzar à se saisir de la Turquie, absolument comme aujourd'hui. Les positivistes protestaient.

Les massacres de Bulgarie furent horribles, c'est vrai, mais ceux commis dans l'Hindoustan, à la Jamaïque et à Paris quelques années auparavant et qui furent l'œuvre de chrétiens, ne l'étaient certes pas moins.

Nous affirmons qu'il n'y aurait point eu de massacres en Bulgarie si les émissaires de la Russie n'y avaient point fomenté des troubles. Jusqu'alors le général Ignatieff avait été tout-puissant à Constantinople et n'avait usé de son influence que pour corrompre les fonctionnaires ottomans.

En 1876, le parti des patriotes, reconnaissant pour chef Midhat-Pacha, déposa et mit à mort Abdul-Aziz, instrument de

la Russie, lui substitua le Sultan actuel et déclara que ce souverain ne tenait le pouvoir suprême que de par la volonté de ses sujets et pour leur prospérité. Peu après, la Constitution de Midhat fut promulguée et les représentants des diverses religions de l'Empire se réunirent en une Assemblée générale. Ce fut là le seul mouvement d'importance qui se produisit en Turquie, il correspond aux réformes polonaises de 1791, dues à Kosciuzko et au parti patriotique.

Dans les deux cas précités, de telles réformes auraient été fatales à l'ambition russe, et chaque fois elle eut recours aux armes pour en prévenir l'accomplissement.

Tout d'abord elle persuada aux autres puissances de se joindre à elle pour demander un contrôle sur le gouvernement turc, contrôle qui aurait dépouillé ce dernier de tout respect et autorité.

Le Grand Conseil, que les puissances affectèrent dédaigneusement d'ignorer, rejeta cette demande à l'unanimité ; en revanche la Russie seule déclara la guerre à la Turquie, et un an après la força de signer le traité de San Stéfano, mais l'Angleterre obligea la Russie à soumettre la révision de ce traité à la Conférence de Berlin.

Nos fanatiques Anglais affectent aujourd'hui de qualifier de criminelle l'intervention de l'Angleterre ; il faut considérer cependant que sans ce traité tous les Etats des Balkans, sans exception, seraient aujourd'hui vassaux de la Russie tout comme l'Egypte relève de l'Angleterre. Admettons que la Bulgarie soit redevable à la Russie de son affranchissement du joug turc, elle n'en est pas moins débitrice de l'Angleterre à qui elle doit son indépendance de la Russie ; la domination de cette dernière puissance aurait été autrement tyrannique et sans espérance d'émancipation. Nul n'ignore les persistants efforts que la Russie n'a cessé d'accomplir depuis lors, dans le but de réduire la Bulgarie à un certain état de vasselage, les moyens qu'elle emploie sont d'une telle infamie qu'à leur seule pensée, tout Etat de l'Europe occidentale recule avec dégoût.

Malheureusement, le crédit que l'Angleterre avait loyalement gagné, était détruit et son honneur terni par l'acquisition de Chypre due à lord Beaconsfield.

Relativement Chypre n'était qu'un maigre butin. Quatre ans plus tard Gladstone s'appropriait l'Egypte. C'était la contrepartie de l'agression de la Russie en Turquie et elle était préparée de la même manière. Il existait un courant patriotique et constitutionnel de résistance au mauvais gouvernement khédivial. Le Parlement égyptien réclamait le droit, très modeste d'ailleurs, d'administrer les taxes indépendantes de la Dette. En réponse, et pour étouffer ce patriotique désir de réformes, nous occupâmes l'Egypte, cherchant à entraîner la France avec nous, de même que la Russie avait entraîné l'Angleterre en 1877, mais nous devons dire, à l'honneur de son gouvernement d'alors, la France refusa de concourir à l'accomplissement d'une telle iniquité. Les positivistes anglais protestèrent énergiquement et unanimement contre la faute que commettait l'Angleterre ; nous faisons observer la révoltante injustice commise envers l'Egypte et le mauvais effet produit sur cette Europe occidentale en qui repose l'espoir de l'Humanité entière. En occupant l'Egypte, nous nous sommes aliénés l'appui de la France, sans laquelle ne peut exister aucun concert européen sérieux, et en se jetant dans les bras de la Russie, la France en a fait son suprême arbitre et a conféré à cette puissance orientale semi-barbare, une influence plus forte que jamais dans ce concert dont elle devrait être exclue.

Si le prestige de cette confédération occidentale fut ébranlé par la capture de Chypre, la conquête de l'Egypte causa sa ruine. Les conséquences de ces iniquités apparaissent nettement aujourd'hui, où l'urgence d'un concert devient chose évidente, non pour mettre fin à l'Empire ottoman, mais pour déposer un Sultan indigne de régner, et maintenu sur le trône par la Russie.

De même qu'Ignatieff il y a vingt ans, l'ambassadeur russe est encore tout-puissant aujourd'hui à Constantinople. Il encourage, il pousse le Sultan à résister à toutes les réformes. Ce souverain vicieux ne peut être châtié, le concert étant rompu, par la raison



que chaque nation européenne est convaincue que l'Angleterre convoite une nouvelle proie.

Nous avons ressenti amèrement les humiliations subies par notre patrie durant ces quelques mois écoulés et qui auraient été évitées si nous avions appuyé la France alors qu'elle se débattait contre l'Allemagne. Si la France et l'Angleterre avaient été alliées, l'une ne serait pas aujourd'hui à Tunis, ni l'autre en Egypte. Quels avantages un peuple retire-t-il de telles conquêtes, qui ne soient chèrement payés par le danger permanent que constitue une méfiance réciproque et une envie continuelle?

Un accord diplomatique a été consenti par l'Angleterre, la France et la Russie ayant pour objet d'imposer au Sultan les réformes jugées nécessaires; la Russie a jusqu'ici encouragé secrètement ce souverain à mépriser les avertissements et les conseils de nos diplomates quoique son ambassadeur soit, en apparence, d'accord avec les autres représentants des puissances. Peut-être lui suggérera-t-il vaguement qu'il doit suspendre momentanément les massacres, mais quant à de sérieuses réformes il n'y en aura pas, par la seule et très simple raison que la Russie a décidé qu'il n'y en aurait point. Nos fanatiques religieux l'enhardissent à persévérer dans cette politique fatale. En effet, M. Gladstone et le chanoine Mac Coll désirent contempler la Turquie non réformée mais divisée, il leur faut une croix (n'importe la forme) surmontant le dôme antique de Ste-Sophie et le spectacle d'un gouvernement musulman réformé leur serait on ne peut plus désagréable, c'est pourquoi M. Gladstone n'encouragea point, ne voulut jamais reconnaître la Constitution de Midhat, unique occasion de réforme qui se soit présentée de nos jours à la Turquie, c'est également la raison pour laquelle il supprima sans scrupules le Parlement égyptien, vers lequel étaient anxieusement tournés les regards des réformateurs musulmans du monde entier.

Il résulte clairement du discours de M. Hanotaux que comme compensation à l'ingérence de la Russie, la possession du trône est garantie au Sultan actuel, même contre la volonté de ses compatriotes, en d'autres termes, le *sine qua non* de toute réforme énergique est impossible. Le spectacle humiliant de l'Europe prosternée aux pieds du Tzar, nous fait craindre que ce honteux compromis ne soit aussi accepté par l'Angleterre.

(Traduction de Claire Napier).

Nous avons reçu d'une source, qui ne nous est pas clairement indiquée, un appel adressé, par un comité libéral ottoman dont nous ignorons le siège, aux Hellènes en général.

Si nous applaudissons à toute tentative qui a pour but l'oubli des discordes, le besoin d'union, nous croyons qu'elle ne devrait pas se limiter aux Grecs et aux Musulmans seuls.

Nous sommes tous d'accord sur la nécessité absolue d'apporter un frein aux débordements de la couronne et de travailler au relèvement de notre pays, mais il est tout aussi indispensable de concentrer les mécontentements. En un mot, tous ceux qui sont de cet avis, quelle qu'en soit la nationalité, la race ou la religion doivent combattre ensemble les ennemis du dedans et du dehors.

Le Sultan étant persécuteur de toutes les populations de l'Empire, elles doivent s'unir dans une commune pensée de légitime défense et de salut.

Turcs, Grecs, Arméniens, Arabes, Syriens, Slaves et autres, la solidarité doit toujours être leur principale devise.

Une correspondance de Rhodes, adressée au *Temps* et insérée dans son numéro du 5 janvier, voudrait innocenter le consul d'Autriche de cette ville de toute participation dans la récente livraison au gouvernement local d'évadés politiques Turcs, ayant pris passage sur un vapeur de la Compagnie Llyod.

Nos renseignements particuliers signalent au contraire, cet agent Autrichien comme l'auteur entièrement responsable d'un acte qu'on ne peut moins taxer que de léger.

Voici d'ailleurs un exact exposé des faits :

19 Druses, victimes de la tyrannie d'Abdul Hamid, exilés dans l'île de Crète, réussirent à s'évader au Pirée. De là, en payant leur transport sur un bateau de la Compagnie Llyod, ils voulurent gagner Chypre.

Pendant le stationnement à Rhodes, le gouvernement local fut informé de leur présence à bord, et obtint du consul d'Autriche, en même temps agent de la compagnie Llyod, la remise des malheureux, qui avaient commis l'erreur de croire à la protection du pavillon autrichien.

La récompense de ce service ne s'est pas fait attendre. Le gouvernement Ottoman s'est empressé de décorer cet agent de l'Autriche pour sa complaisance au despotisme du Sultan.

Ce n'est pas d'ailleurs la première fois qu'un pareil fait se produit. Il n'y a pas longtemps encore, un Jeune Turc de nos camarades était livré dans les mêmes conditions, par le consul d'Autriche à Chio, lui aussi agent de la Compagnie Llyod.

C'est avec une profonde tristesse que nous dévoilons cette conduite des agents autrichiens. De tels actes de déloyauté seront unanimement condamnés.

S'ils devaient se renouveler, la compagnie de transport qui les permet ne tarderait pas à voir décroître son prestige et à perdre la confiance des populations des côtes méditerranéennes qu'elle dessert.

Nous avons eu le plaisir de nous entretenir longuement des affaires de Turquie avec M. le docteur Grenier, le nouveau député Musulman de Pontarlier. Nous avons été très heureux de trouver un nouvel appui moral chez un représentant de la Nation française, appui doublement précieux puisqu'il nous apporte un encouragement et une adhésion à l'œuvre que nous poursuivons. Comme Musulman, il reconnaît que la néfaste influence exercée par l'indigne potentat, sous le joug duquel gémit la Turquie, impose à chaque Croyant le devoir, si nettement indiqué par le Koran, d'adresser au chef religieux de justes remontrances.

Nous espérons que ces nobles sentiments se traduiront d'une façon effective dans son action politique et qu'il les fera partager à ses collègues de la Chambre. Les préventions que pourrait susciter la différence des croyances sont aujourd'hui entièrement éteintes. La France est la première nation qui ait exclu de l'ordre public tout ce qui peut diviser les consciences; la confession religieuse de chaque citoyen ne peut plus en aucun cas être une cause d'indignité, comme le prouve l'élection du docteur Grenier, due certainement autant à ses mérites personnels qu'à ses convictions religieuses.

Le terrain de l'Humanité est le seul sur lequel tous peuvent s'entendre. Nous convions tous les amis du progrès à s'y placer avec nous pour la revendication des droits méconnus d'une grande nation opprimée.

Le *Times* a publié un article de sir William Hunter, son rédacteur des affaires indiennes, résumant l'impression de tristesse et d'indignation causée parmi les sujet Musulmans de la reine Victoria par les attaques dont Abdul Hamid, et avec lui l'Islam même, ont été l'objet en de certains milieux.

Les Musulmans de l'Inde, où ignorent l'islamisme et ce qui se passe en Turquie, ou ce que rapporte l'honorable rédacteur du *Times* n'est pas l'expression sincère de leurs sentiments,

Ils peuvent à bon droit réprover, l'attitude de certains arméniophiles protestants qui, croyant servir la cause arménienne — ou pour mieux dire la cause chrétienne — attaquent l'islamisme et peuvent également s'indigner des actes de quelques agitateurs sans scrupule qui préparent le massacre et sèment la haine entre deux peuples.

Nous pouvons admettre que le Musulman des Indes se montre irrité d'actes semblables. Mais quant à son indignation pour les attaques dirigées contre la conduite du Sultan, la chose nous paraît d'autant plus invraisemblable qu'aucun bon Musulman ne



peut et ne doit prendre le parti d'un despote qui viole la loi de la Religion et même celle de l'Humanité.

Le rédacteur du *Times* appuie son opinion sur la citation de quelques passages de journaux musulmans; mais, de notre côté, les documents ne nous manquent pas non plus pour montrer que les populations de l'Inde méprisent Abdul Hamid.

Dans certaines contrées, appartenant principalement aux sectes Kadiri, dont il fit insulter le chef par les cheikhs qui l'entourent, les prédicateurs qui prononcent le prône à la mosquée les vendredis ont même refusé de le reconnaître comme calife.

Pour nous, tous ces récits ont un autre but; celui-là exclusivement politique. On veut faire croire à l'Europe que les Musulmans de Turquie ou d'autres contrées, les vieux Turcs, les fanatiques, éprouvent un vif mécontentement des attaques dont leur chef spirituel est l'objet et de l'intrusion des puissances étrangères dans la direction des affaires ottomanes. N'avait-on pas dit avant le discours de Salisbury, que si ce dernier attaquait le Sultan, le monde musulman se révolterait.

C'est une menace, que doit d'ailleurs agiter fort à propos Abdul Hamid et qui lui sert à motiver ses refus répétés aux réclamations des cabinets européens, objectant toujours qu'il doit ménager le fanatisme musulman.

Mais c'est là une assertion complètement fausse. Les Musulmans détestent au contraire le Sultan actuel. Les lettres que nous avons déjà publiées à ce sujet, lettres émanant des Ulémas qui condamnent la politique du Sultan, ainsi que les articles d'un journal publié en ce moment au Caire par un professeur en théologie musulmane, qui traduit exactement les pensées de ses coreligionnaires et celles des softas, se basant sur les données du Koran et du Chéri, le prouvent surabondamment.

M. Gladstone, en recevant une députation d'Arméniens venue pour fêter le 85<sup>e</sup> anniversaire de sa naissance, a prononcé un discours véhément contre le Sultan. Il a dit, en résumé, que, malgré la grande puissance morale de l'Angleterre, elle n'a pu qu'exprimer des convictions. Le fardeau de la honte retombe, dans la question arménienne, sur les six puissances. Jusqu'ici, le Sultan, qui est le plus grand assassin du monde, triomphe. Les iniquités n'ont pas encore atteint leur terme, mais elles recevront un châtement.

Un télégramme tendancieux prétend que le consulat de Russie à Constantinople serait gardé dans la crainte d'une attaque d'Arméniens et de Jeunes Turcs.

La perfidie autant que l'absurdité de cette soi-disant nouvelle n'a pas besoin d'être relevée.

Nous attaquons et attaquons la Russie tant qu'elle aura en vue la ruine de notre pays et qu'elle travaillera au maintien d'Abdul Hamid; mais nous n'en voulons ni aux Russes personnellement ni à leurs édifices publics.

Si par impossible la Russie venait un jour à changer de politique elle n'aurait pas de plus grands amis que nous.

C'est avec une satisfaction réelle que nous avons accueilli le livre que vient de publier à Londres M. Antony Salmoné « *Chute et résurrection de la Turquie*. » L'auteur examine et décrit en témoin oculaire toute les causes qui, depuis vingt ans, ont contribué à la décadence de l'Empire ottoman. Les faits qu'il cite à l'appui pour être parfois personnels n'en sont pas moins pleins d'intérêt. Mais tout en retraçant cette lente décadence, M. Salmoné ne nous laisse pas le temps de méditer trop longtemps sur ces ruines. Il indique les symptômes manifestes de relèvement qu'il trouve dans l'esprit révolutionnaire dont il croit animé tout le peuple, et cite à l'appui les révoltes des Arméniens, Crétois, Macédoniens, Druses, Arnaouts, etc. Il nous annonce comme très prochaine la fin du joug oppresseur du Sul-

tan. Nous sommes obligés à M. Salmoné de l'éloge qu'il fait de notre parti et nous souhaitons à son intéressant travail tout le succès qu'il mérite.

## VARIÉTÉ

### TOLÉRANCE MUSULMANE (1)

Je me propose dans les lignes qui suivent un double but: réfuter, dans l'intérêt de la vérité, l'opinion si généralement accréditée en Europe concernant l'intolérance des Musulmans, et laver ces derniers de l'accusation plus ou moins intéressée d'avoir exécuté par fanatisme religieux les récents massacres en Orient. Je tâcherai de montrer que les nobles qualités des populations musulmanes, dont une partie se trouve sous la domination de la France, ont pris leur germe dans la religion islamique elle-même.

On dit que les Arabes de l'Algérie, réfractaires aux idées modernes, n'ont pu être assimilés par leurs vainqueurs. Mais des hommes politiques français reconnaissent eux-mêmes que les Algériens ont été fort mal gouvernés jusqu'ici, et qu'il y a eu entre eux et la civilisation occidentale des intermédiaires et des agents qui ont plutôt éloigné qu'attiré leurs sympathies.

Les missionnaires et certains financiers poursuivent les uns comme les autres des intérêts divers, mais distincts de ceux de la République et de la France. Dans ces derniers temps seulement et depuis Jules Ferry surtout, on a commencé à étudier sérieusement les Arabes, à s'intéresser à leurs mœurs et à leur caractère, au point de vue d'un rapprochement avec la métropole.

A l'époque où l'Algérie avait un gouvernement militaire, les indigènes étaient, assure-t-on, plus satisfaits. Les officiers français qui avaient reconnu en eux des dispositions viriles et guerrières, furent à même d'apprécier les qualités morales des vaincus.

Aujourd'hui, les commerçants, les industriels, les exploitants de tout genre, aux allures hautaines et au langage dédaigneux, blessent ces fières populations, tandis que les missionnaires heurtent leurs sentiments religieux, en affectant de considérer leurs croyances comme des erreurs.

Ces représentants de l'Eglise ont généralement assez de religion pour haïr toute autre secte que la leur, mais ils en ont rarement assez pour aimer le prochain qui ne partage pas leur manière de voir.

Pour gouverner bien et gagner moralement un peuple qui a un passé et de glorieuses traditions, il faut l'aimer, et, pour l'aimer, il faut le connaître. Lorsqu'on ne peut admettre sa religion comme vraie et qu'on pense que, aveugle d'esprit, il a besoin d'être instruit et réformé, il est nécessaire d'user d'indulgence et de tolérance, comme on en use avec les faibles et les égarés; on doit, en un mot, l'éclairer et non le contraindre. « Nous ne pouvons attendre raisonnablement, dit Locke, que personne abandonne promptement et avec soumission ses propres sentiments pour embrasser les nôtres avec une aveugle déférence pour une autorité que l'entendement de l'homme ne reconnaît point »: (1)

Je sais qu'il est difficile de se débarrasser du jour au lendemain de préjugés aussi enracinés parmi les nations chrétiennes que ceux qui considèrent les musulmans comme des sectaires grossiers et fanatiques.

Ces préjugés, ces préventions injustes datent du Moyen-Age; ils ont été combattus dès le xvi<sup>e</sup> siècle par de grands écrivains, précurseurs de la Révolution française; malheureusement ces écrivains, dont le nom est cependant si souvent pro-

(1) Cette étude a été publiée dans la *Revue Occidentale* du 1<sup>er</sup> novembre 1876.

(1) *Entendement humain*.



noncé, ne sont plus guère lus aujourd'hui, et la foule continue toujours à juger d'après le témoignage de prêtres militants qui ont intérêt à dissimuler ou à fausser la vérité. Chaque fois que des troubles ou qu'une guerre politique se produisent en Orient, ils l'attribuent aussitôt au fanatisme musulman. Certains journaux qui aiment à caresser les opinions reçues, répètent le même refrain.

Un écrivain distingué, qui, certes, connaît mieux que moi les sentiments du peuple français sur ce sujet, s'exprime ainsi dans un ouvrage récemment publié :

« Nous nous sommes étendus sur la tolérance religieuse dont l'islamisme avait fait preuve dans son expansion rapide en Occident, parce que c'est parmi les nations chrétiennes que s'est accréditée l'opinion contraire, opinion si tenace qu'elle a cours encore aujourd'hui, malgré le témoignage de l'histoire et des voyageurs qui ont parcouru l'Orient (1) ».

On constate aujourd'hui que l'Europe est plus ou moins débarrassée des querelles religieuses et des luttes violentes qu'engendre le fanatisme, et la foule en conclut volontiers qu'il en a toujours été ainsi. Pour elle, l'histoire est lettre morte, et elle ne sait rien ou presque rien du passé. Mais les esprits cultivés et éclairés n'hésiteront pas à attribuer la pacification religieuse qui règne actuellement plutôt au progrès de l'esprit scientifique qu'à l'influence du christianisme. Ils n'hésiteront pas davantage à accuser des derniers désordres de la Turquie non pas le fanatisme musulman, mais la faiblesse, l'incurie et l'incapacité du gouvernement actuel.

Loin de moi la pensée d'exalter l'Islamisme aux dépens de la religion chrétienne. Je reconnais qu'on trouve aux origines mêmes de celle-ci de hautes et nobles pensées de clémence et d'indulgence, surtout dans les écrits des apôtres Saint Paul et Saint Luc qui, s'inspirant eux-mêmes des grandes traditions romaines en matière de religion, sont restés pour les chrétiens orthodoxes les meilleurs maîtres en matière de tolérance.

Saint Paul écrivait aux Thessaloniciens : « Si quelqu'un vient vous annoncer un autre Christ, vous proposer un autre esprit, vous prêcher un autre évangile, vous le souffrirez ». Il écrivait encore : « Ne traitez point en ennemi celui qui n'a pas les mêmes sentiments que vous, mais avertissez-le en frère ».

Saint Luc représente Jésus sur la croix priant pour ses bourreaux, et prononçant ces paroles : « Pardonnez-leur, Seigneur, parce qu'ils ne savent ce qu'ils font ».

Malheureusement, ces belles paroles étaient de simples conseils, des inspirations morales; elles n'avaient point la force et l'autorité d'un ordre formel ou d'une direction imposée à la conduite de l'Eglise. Celle-ci, se conformant à la parole attribuée au Christ : « Mon royaume n'est pas de ce monde », et n'ayant que préoccupations supra-terrestres, n'a pas fait entrer ces principes dans la pratique de la vie d'ici-bas. C'est en vain que l'Evangile criait : « Aimez votre prochain comme vous-mêmes. Aimez aussi vos ennemis, faites du bien à ceux qui vous haïssent ».

Les représentants de la doctrine chrétienne sur la terre n'en continuaient pas moins de brûler les Juifs au nom de Jésus. Les Chrétiens catholiques restaient les ennemis des Chrétiens protestants et tous deux portaient au même degré le fanatisme et l'intolérance contre les Musulmans et les Israélites. Helvétius avait raison de dire : « On doit conclure que la religion, non cette religion douce et tolérante établie par Jésus-Christ, mais celle du prêtre, celle au nom de laquelle il se déclare vengeur de la Divinité et prétend au droit de brûler et de persécuter les hommes, est une religion de discorde et de sang (2) ».

Certes, les religions ont quelquefois versé de grands maux sur l'homme; les ministres des cultes ont souvent déshonoré leurs discours et leur vie par l'exemple de crimes, par une lâche complaisance pour d'ignobles tyrans, par une oppression plus lâche encore sur le développement des idées libérales. Les efforts criminels du fanatisme contre la raison doivent être à jamais exécrés. Le fanatisme et les superstitions sont certainement une aberration du sentiment religieux. Une religion qui est censée d'origine divine ne peut, sans mentir à son principe, régner par la violence, la haine et la torture. Si un Dieu a fait cette religion, il doit avoir la puissance de la soutenir sans inciter au meurtre ses interprètes et ses représentants. L'intolérance n'agit que sur les consciences malhonnêtes; elle ne crée que des hypocrites, comme on en voit un si grand nombre autour des souverains absolus des cours d'autrefois et d'aujourd'hui. Le mot même de tolérance est quelque chose de sacré; il exprime une idée de générosité, de franchise et de justice. La liberté du culte est une émanation de la liberté de penser : en jouir est le droit de chacun, la respecter est le devoir de tous.

Telles sont, à peu près, les pensées qui ont également guidé Mahomet dans la fondation de l'islamisme. En simplifiant les dogmes de ses prédécesseurs et en ramenant l'essence de la religion à la croyance en un Dieu unique, il a arrêté du même coup les luttes provoquées par les discussions théologiques. Il s'est inspiré également des antiques traditions romaines dans l'établissement de ses lois religieuses et civiles; il a appliqué ce principe du Sénat romain : « C'est aux dieux seuls de se soucier des offenses faites aux dieux ».

Le Koran s'exprime sur ce point de la même façon et dit dans le ch. VI, v. 52 : « Il ne t'appartient pas de juger leurs intentions (celles des non-musulmans), comme il ne leur appartient pas de juger les tiennes ».

Il semble que l'*Imitation de Jésus-Christ* n'ait fait que paraphraser Mahomet, lorsqu'elle dit :

Qu'un tel soit humble, qu'il soit vain,  
Qu'il parle ou qu'il agisse en telle ou telle sorte,  
Encore une fois, que t'importe?  
Ai-je mis sa conduite, ou sa langue en ta main?  
As-tu quelque part à sa honte?  
Répondras-tu pour lui de son peu de vertu?  
Ou si c'est pour toi seul que tu dois rendre compte,  
Quels que soient ses défauts, de quoi t'embrouilles-tu?

Mahomet était doux et patient. Il a donné, au cours de son existence, maintes preuves de patience et de résignation. Supporte avec patience, dit le Koran, leurs discours et célèbre les louanges de ton Seigneur ». Il s'est toujours considéré comme un simple mortel, et sa mission à ses propres yeux se bornait à la prédication et à l'enseignement : « Dis à ceux qui ont reçu les Ecritures et aux hommes dépourvus de toute instruction : Vous résignerez-vous à Dieu? S'ils le font, ils seront dirigés sur la droite voie; s'ils tergiversent, tu n'es chargé que de la prédication » (2) Lorsqu'il invitait le peuple à embrasser l'islamisme, son langage était celui de la douceur et de la persuasion.

(A suivre).

AHMED RIZA.

(1) *Imitation de Jésus-Christ*, traduction de P. Corneille.  
(2) *Koran*, ch. III, v. 19.

Le journal est vendu sous l'Odéon; au 38, rue Monge, et au kiosque n° 10, Mme Lelong, boulevard des Capucines, en face du Grand Café, — M. Bichara, 42 bis, boulevard Bonne-Nouvelle.

Le Gérant : HOUILLON.

(1) Le comte Henry de Castries, *L'Islam*.  
(2) Helvétius. *De l'homme*.
