# Supplementary material
Source: Research Square preprint supplement (doi:10.21203/rs.3.rs-9653111/v1)
Supplement: Supplementary file 7 [file Turquie Contemporaine. Incompatibilité du Régime Théogratique avec les Idées Modernes. 1 May 1891.pdf › Primary Sources/Turquie Contemporaine. Incompatibilité du Régime Théogratique avec les Idées Modernes. 1 May 1891.pdf]

Turquie contemporaine : Organe de la jeune Turquie, paraissant 3 fois par mois. 1891/05/01.

1/ Les contenus accessibles sur le site Gallica sont pour la plupart des reproductions numériques d'oeuvres tombées dans le domaine public provenant des collections de la BnF.Leur réutilisation s'inscrit dans le cadre de la loi n°78-753 du 17 juillet 1978 :  
\*La réutilisation non commerciale de ces contenus est libre et gratuite dans le respect de la législation en vigueur et notamment du maintien de la mention de source.  
\*La réutilisation commerciale de ces contenus est payante et fait l'objet d'une licence. Est entendue par réutilisation commerciale la revente de contenus sous forme de produits élaborés ou de fourniture de service.

Cliquer [ici](#) pour accéder aux tarifs et à la licence

2/ Les contenus de Gallica sont la propriété de la BnF au sens de l'article L.2112-1 du code général de la propriété des personnes publiques.

3/ Quelques contenus sont soumis à un régime de réutilisation particulier. Il s'agit :

\*des reproductions de documents protégés par un droit d'auteur appartenant à un tiers. Ces documents ne peuvent être réutilisés, sauf dans le cadre de la copie privée, sans l'autorisation préalable du titulaire des droits.  
\*des reproductions de documents conservés dans les bibliothèques ou autres institutions partenaires. Ceux-ci sont signalés par la mention Source gallica.BnF.fr / Bibliothèque municipale de ... (ou autre partenaire). L'utilisateur est invité à s'informer auprès de ces bibliothèques de leurs conditions de réutilisation.

4/ Gallica constitue une base de données, dont la BnF est le producteur, protégée au sens des articles L341-1 et suivants du code de la propriété intellectuelle.

5/ Les présentes conditions d'utilisation des contenus de Gallica sont régies par la loi française. En cas de réutilisation prévue dans un autre pays, il appartient à chaque utilisateur de vérifier la conformité de son projet avec le droit de ce pays.

6/ L'utilisateur s'engage à respecter les présentes conditions d'utilisation ainsi que la législation en vigueur, notamment en matière de propriété intellectuelle. En cas de non respect de ces dispositions, il est notamment passible d'une amende prévue par la loi du 17 juillet 1978.

7/ Pour obtenir un document de Gallica en haute définition, contacter [reutilisation@bnf.fr](mailto:reutilisation@bnf.fr).



# TURQUIE CONTEMPORAINE

## ORGANE DE LA JEUNE TURQUIE

ABONNEMENTS  
FRANCE  
Un an.... 20 fr. — Six mois.... 10 fr.  
PAYS ÉTRANGERS  
Un an.... 25 fr. — Six mois.... 15 fr.  
Pour envoi sous enveloppes cachetées :  
Un an.... 35 fr. — Six mois.... 20 fr.  
Les abonnements partent du 1<sup>er</sup> de chaque mois

Paraissant 3 fois par mois

Dem. GEORGIADES, directeur

Rédaction : 1, rue Lafayette.

Le journal n'est envoyé que contre remise anticipée du prix de l'abonnement.

On s'abonne à la Rédaction ou par lettre accompagnée du montant de l'abonnement en mandat-poste ou chèque, adressée au Directeur.

Pour annonces on traite de gré à gré.

Première année. — N° 2

Prix du numéro : 75 centimes

Vendredi, le 1<sup>er</sup> Mai 1891.

### AVIS ESSENTIEL

La suite du Journal ne sera envoyée qu'aux abonnés seuls et aux journaux qui en désireraient faire l'échange.

### LA TURQUIE CONTEMPORAINE

#### II

Depuis que la crise orientale monte sans cesse, depuis que les masses souffrantes crient misère plus fort, un invincible courant dirige en Orient les esprits clairvoyants vers la recherche des causes viscérales du mal terrible qui ronge la Turquie.

Ceux qui étudient de près l'état économique actuel de ce pays, ceux qui sondent les flancs de la société qui y végète et croupit dans l'ignorance, se rendent seuls compte qu'on marche à un épouvantable cataclysme, si des sauveteurs courageux et intrépides ne surgissent pas à temps pour arrêter le progrès de la gangrène financière et politique qui se développe d'une manière effrayante. Le peuple étouffant sous les griffes de ses vampires ne saura continuer longtemps à suer chaque année des centaines de millions de piastres d'impôts pour assouvir les appétits jamais apaisés de la Cour de Yildiz-Kiosk, SANS PROFIT AUCUN, ni pour le relèvement économique du pays, ni pour le rétablissement du crédit public.

Après tant de faillites, depuis 1874, après la misère poignante qui pèse de tout son poids sur toute l'étendue des domaines du Padichah, après l'anarchie et le désordre qui brillent de leur plus bel éclat dans toutes les administrations publiques, après les folles dilapidations de la Liste Civile qui absorbe presque la totalité des revenus de l'Etat, après les arriérés de huit mois, sur douze de l'année, des appointements de tous les fonctionnaires et employés de l'Empire, il faut être un aveugle pour ne pas prévoir la prochaine banqueroute, finale celle-là, plus désastreuse que les précédentes. Ni le génie financier de sir Edgar Vincent, ni les efforts du puissant syndicat qu'il a constitué en Europe pour le soutien des valeurs turques, à la suite de la dernière conversion, ne réussiront à détourner la banqueroute. C'est que cette banqueroute n'est pas seulement aux portes du malheureux pays ; elle est installée à son chevet par la faute d'un gouvernement inepte qui saigne aux quatre veines le plus bel Empire du monde.

Quand un souverain tolère les actes incorrects de l'administration de sa Liste Civile et quand des ministres ont pour règle de leur conduite ce principe « APRÈS NOUS LE DÉLUGE » et deviennent les plus révoltants des spéculateurs qui trafiquent des concessions, en cherchant des profits éphémères, sans se soucier le

moins du monde du lendemain et de l'avenir des intérêts de l'Etat et du pays, que peut-on attendre d'un pareil gouvernement ?

On se trompe étrangement si l'on croit que le parti de la Jeune Turquie est complètement écrasé parce qu'il a été vaincu une première fois. Tout nous atteste au contraire que devant le spectacle de l'affreuse misère, qui a envahi le pays, et en présence du désarroi financier de l'Etat, les hommes éclairés et les vrais patriotes, qui forment ce parti, s'agitent sans cesse et travaillent sans relâche pour détourner S. M. I. le Sultan de la voie périlleuse dans laquelle son entourage l'a si malheureusement engagé. Les fautes commises inévitablement au début par les fondateurs de la Jeune Turquie rendent aujourd'hui, par bonheur, leurs partisans plus réservés et plus circonspects sur les moyens de procéder pour porter remède à l'état actuel. Tout en reconnaissant l'incompatibilité, avec les idées modernes, du régime odieux sous lequel gémit le peuple, ils n'entendent pas, avec raison, retomber une seconde fois dans cette bouffonnerie, par laquelle on avait tenté de doter la Turquie du parlementarisme occidental en faisant nommer des députés par les Kurdes et par les Bédouins, sur le principe du suffrage universel, appliqué aux Kurdes nomades de l'Asie et de l'Afrique !

### LA SÉPARATION DE L'AUTORITÉ POLITIQUE D'AVEC CELLE DU CALIFAT

Ce qu'il faut et ce dont la Turquie a besoin, sous peine de mort, d'après l'avis des hommes sensés de l'Empire, c'est la séparation de l'Etat d'avec le pouvoir spirituel, c'est la séparation de l'autorité politique de celle du califat, c'est la sécularisation du pouvoir. Enlever, en d'autres termes, aux Sultans le gouvernement temporel absolu, qui est la cause unique des malheurs de la Turquie, et le confier à une véritable Assemblée nationale, à un Conseil ou Contrôle d'Etat, le nom importe peu, mais à une représentation nationale effective. Celle-ci comprendrait des membres éclairés élus par des conseils départementaux des différents Vilayets de l'Empire dont le nombre serait proportionné à l'importance de la population de chaque nationalité. Le pouvoir exécutif, exercé par des ministres responsables sous le contrôle de la représentation nationale, devrait naturellement être soumis à l'autorité suprême du Souverain qui conserverait son droit de veto.

Aujourd'hui malheureusement, un intérêt d'ambition personnelle qui se déguise en Sa Majesté le Sultan Abdul-Hamid, sous la forme d'un devoir religieux, c'est la poursuite d'une gigantesque entreprise, la constitution sous son commandement d'une grande ligue panislamique pour le développement de son titre de calife dont il s' imagine pouvoir tirer toute son autorité. Cette pensée domine et dirige toute sa conduite, car c'est de la poli-



tique panislamique qu'il attend la revanche des malheurs de son empire.

Le sultan Abdul-Hamid a un goût prononcé pour cette ligue. Ce goût est si vif, si invétéré, que les déceptions les plus cruelles qu'il en a jusqu'ici éprouvées n'ont pu encore l'en détourner.

Les quelques fanatiques de ses partisans qui l'entourent et le bercent dans ses illusions, si peu intéressants qu'ils soient par eux-mêmes, exercent aujourd'hui un empire tel sur son esprit, qu'ils l'inspirent dans ses moindres actes. La condamnation à la déportation de Midhat Pacha et de ses partisans a fait éclater aussitôt aux yeux de tout le monde ce changement profond que le sultan Abdul-Hamid a opéré dans la politique de son empire. Dominé par l'ambition religieuse universelle, il est capable de sacrifier les intérêts les plus vitaux de l'Etat et de son Empire au rétablissement du pouvoir théocratique et barbare du califat. Sans doute, dans toutes les époques de l'histoire ottomane, les sultans se sont regardés comme chargés d'une mission religieuse universelle; mais jamais, de nos jours du moins, ni le sultan Mahmoud, ni Medjid le père du sultan régnant, ni Aziz son oncle, ni le malheureux Mourad son frère, n'avaient fait de cette mission le centre et le pivot unique de leur politique.

Infortuné souverain! Il ignore que cette concentration et identification dans sa personne de la puissance temporelle et du califat, qui prime son pouvoir politique, est la véritable cause de la décadence de son empire, le motif unique qui y fait échouer toutes les réformes modernes.

Isolé au milieu d'une armée d'espions et de conseillers ignorants et rapaces, entravé continuellement par les préjugés et le fanatisme, Hamid prépare ainsi sans s'en apercevoir la dislocation définitive, dans un prochain avenir, de son empire chancelant.

D'un autre côté, méfiant et soupçonneux par sa nature mélancolique; par les complots chimériques et burlesques que son entourage s'applique à découvrir chaque jour — découvertes qui constituent une véritable source de richesse pour leurs auteurs — il s'est enfermé prisonnier volontaire dans cette forteresse de son Yildiz-Kiosk, dont il a fait une cellule, gardée jour et nuit par des milliers de soldats. De nombreux agents secrets, en quête perpétuelle de conspirateurs imaginaires, fouillent et refouillent chaque coin, chaque demeure, chaque issue de cette impériale prison où grouillent tant de passions et de folies. Rien au delà des limites de cette véritable forteresse ne préoccupe à aucun autre titre ce monde qui forme la Cour impériale de l'empire Ottoman, si ce n'est qu'au point de vue étroit et exclusif de la sécurité personnelle et de la préservation sur le trône du sultan qui l'habite. Cette manière de comprendre le califat est sans doute récente dans l'histoire de l'islamisme et des sultans qui ont régné avant Abdul-Hamid. C'est pourquoi son autorité et son prestige sur le monde musulman ont déchu dans des proportions énormes.

En présence de l'activité extraordinaire du mouvement social de notre siècle, il n'y a plus d'avenir que pour les peuples capables de se soutenir seuls, de se nourrir de leur propre substance, en se soumettant aux nécessités de la vie moderne, qui sont les mêmes pour tout le monde, en dépit des différences de mœurs, de sentiments, de principes et de religion.

#### INCOMPATIBILITÉ DU RÉGIME THÉOCRATIQUE AVEC LES IDÉES MODERNES

Or, c'est ce que les régimes théocratiques ne feront jamais. Il est vrai que l'islamisme est une religion très simple, très rationnelle, très peu surnaturelle; mais ses mérites ne peuvent servir qu'à ceux qui la pratiquent. Pour tous les autres, elle est implacable: il faut qu'ils disparaissent ou qu'ils soient opprimés. Quoi qu'en disent certains cosmopolites, le Coran ne permet pas de traiter l'infidèle comme le vrai croyant et de donner au chrétien des droits égaux aux siens. Et en tant que le Coran est la base, le principe fondamental de l'Etat, l'Empire ottoman ne pourra jamais

se relever pour marcher en harmonie avec le reste des sociétés civilisées.

Le sultan Hamid, en s'efforçant de rajeunir, de renouveler en lui le prestige du califat et d'étayer son trône chancelant par le fanatisme et le terrorisme, ne s'aperçoit pas que c'est l'autorité spirituelle de ses prédécesseurs qui a fait avorter politiquement la régénération de l'Empire ottoman.

Si la Turquie était une nation ordinaire, elle pourrait encore se relever de ses désastres; elle ne le pourra en tant qu'elle voudrait être l'armée de l'Islam. Superfétation monstrueuse sur le sol européen, la domination de l'islamisme n'y peut végéter en harmonie avec les sociétés modernes. Préjugés, mœurs, habitudes, tout en elle est discordant de tout le reste. Stationnaire, immobile par son essence, elle est aujourd'hui ce qu'elle était à l'origine de son invasion en Europe, et, par cela seul qu'elle ne peut se prêter au mouvement général du monde civilisé, elle l'entrave.

Cette permanence d'opposition, plus tolérable, peut-être, aux siècles passés, ne saurait l'être plus aujourd'hui. Le temps, régisseur irrévocable de ce monde, semble avoir donné l'immobilité à l'islamisme et ne marche point pour lui. Versant les lumières et les bienfaits de la sociabilité et de la civilisation sur le reste du monde, son action vivifiante et toujours progressive embrasse la totalité du genre humain et ne rejette que l'islamisme. Celui-ci, absolument hors de la sphère d'activité du mouvement social, impassible dans son immutabilité, ne peut de jour en jour qu'augmenter en opposition avec le monde perfectible, et par conséquent, le contrarier davantage. Quel accord, quel accommodement possible? Opposés entre eux, une exclusion mutuelle les sépare à tout jamais.

« La transformation de l'Etat — affirme magistralement M. Ahrens — se fait sous le mode d'un *contrat* ou d'une convention qui fixe les droits et les obligations de tous, établit la forme de gouvernement et les moyens d'administration. Ce mode d'organisation d'un Etat ne se rencontre guère que chez les peuples modernes et chrétiens, et doit être considéré comme une conséquence sociale de l'esprit du christianisme. Car la religion chrétienne, en relevant la personnalité de l'homme, en lui donnant la conscience de sa valeur propre, lui a fait comprendre aussi, quoique après bien des siècles, qu'il doit compter comme un membre personnel, avec sa volonté libre et réfléchie, dans la constitution de l'Etat... »

Le Coran refusant d'une manière absolue le droit aux chrétiens de compter comme membres personnels dans la constitution de l'Etat en Turquie, c'est la mort qui ne peut s'allier à la vie. C'est que la morne torpeur de l'islamisme fait barrière à l'ardente activité du monde chrétien.

Ajoutez à toutes ces vérités la dépravation et la malpropreté des mœurs gouvernementales, la puanteur des caractères du monde officiel, la corruption des consciences et l'immoralité administrative, et vous aurez alors une idée exacte de la terrible gangrène qui ronge cet Etat qui s'appelle l'Empire ottoman.

Rien n'y est solide, si ce n'est qu'un instinct de rapine, fort embarrassant pour former un Etat. « Aujourd'hui l'infection est complète: ce n'est plus un empire qui s'écroule; c'est une société qui s'en va. Le moindre choc risque de faire tomber en poussière son édifice vermoulu jusqu'aux entrailles. »

Dans les conditions nouvelles que notre siècle a faites aux nations avec l'essor prodigieux qu'il a donné à l'activité humaine dans toutes les branches industrielles, commerciales et maritimes, un gouvernement qui ne vit que de luxe et où ce luxe ne peut être alimenté que par l'arbitraire et la violence, le travail étant à ses yeux un signe d'esclavage, est condamné irrévocablement à une chute certaine. Ici encore, pour ne pas être accusé de détraction systématique, il importe de nous en rapporter au témoignage autorisé et impartial d'un éminent écrivain qui s'est fait une renommée bien méritée de spécialiste dans les affaires d'Orient, mais qu'une mort prématurée a si cruellement arraché



à la France : nous parlons des remarquables études de Gabriel Charmes.

#### OPINION DE GABRIEL CHARMES

« Comme la guerre n'enrichit plus, — dit le profond observateur, — pour soutenir le poste dont il a pris l'habitude, le crédit est son unique ressource. Or il est des peuples comme des individus : ils sont bientôt à la merci de leurs créanciers. On a souvent comparé le sultan Mahmoud à Pierre le Grand ; on a eu raison de le faire. Ce souverain sans instruction personnelle, isolé au milieu de conseillers plus ignorants que lui, entravé sans cesse par les préjugés et le fanatisme, opérant, enfin, sur une race épuisée, n'a pas eu moins de génie, quoiqu'il ait eu moins de succès, que le héros à demi civilisé, à demi barbare, qui a donné aux Russes l'essor de la jeunesse et l'élan de la vie. Du fond de son palais où tout devait le lui cacher, il a entrevu le monde moderne, et il a compris que, si la Turquie ne se modelait pas à son image, elle périrait inévitablement sous ses coups. Par malheur, il n'avait pas seulement à lutter contre la décrépitude de son peuple ; la nature de son propre pouvoir était un obstacle presque invincible à sa grande entreprise. »

#### OPINION DU MARÉCHAL DE MOLTKE

Le maréchal de Molke, témoin des efforts comme des échecs du sultan Mahmoud, le premier réformateur de son empire, a également exposé le même fait avec la sagacité d'un grand observateur :

« La longue querelle entre l'Eglise et l'Etat, dit-il, qui se poursuit à travers toute l'histoire de l'Occident, n'a touché aucun pays moins que la Turquie, où le chef de l'Etat est en même temps chef de l'Eglise. Une telle lutte de la puissance temporelle serait extrêmement périlleuse dans un pays où tant de peuples différents, Turcs et Arabes, Kurdes et Bulgares, Arnauts et Slaves, ne sont unis que par le lien de la foi, et où la moitié des sujets sont les parents spirituels d'une puissance voisine. Le Sultan est, il est vrai, en même temps calife ; mais, en cette qualité, il est doublement tenu de maintenir la doctrine du mahométisme. De même que la loi mosaïque, l'islam s'étend sur une foule d'objets extérieurs. Il élève des règlements de police au rang de dogmes religieux, s'opposant au développement de l'esprit, de la culture générale et des intérêts matériels. C'est un crime que de disséquer un corps humain : la chirurgie ne peut donc point faire de progrès, et la croyance en la prédestination s'oppose aux mesures contre la peste. L'art de la peinture est exclu parce que les hommes et même les animaux demanderont compte de leur âme à celui qui les aura représentés ; la signification fatale du mois de *sifer*, la bonté du lundi, etc., régissent les entreprises militaires, sans que l'on tienne compte de la saison et de la température. L'obligation légale de prendre un bain dans des circonstances déterminées autorise à négliger toute espèce de service, et le jeûne du Ramazan interdit toutes les affaires. Le musulman ne se résigne que difficilement à se faire une saignée, et le vin fortifiant est interdit même aux convalescents dans les hôpitaux.

Un nombre immense de personnes sont frappées de cécité, parce que l'œil du vrai croyant ne doit pas être protégé par un parasol, et qu'il est tenu, lorsqu'il est en prière, de toucher la terre de son front. Le soldat porte des bottes qui lui rendent la marche impossible, parce qu'il est obligé de les quitter cinq fois par jour pour faire ses ablutions. Le calife, lorsqu'il veut être le sultan de l'Empire ottoman, est donc réduit à ébranler l'autorité des doctrines de l'islam, celles-là mêmes où il puise son pouvoir absolu. »

C'est donc parce qu'il est calife, que le Sultan n'a jamais réussi à transformer son empire en empire européen ; cela n'a point empêché l'Europe d'admettre cet empire au nombre des puissances civilisées. Mais cette admission de la part de puissances complaisantes n'a eu d'autre effet que de lui inoculer tous les vices de l'Occident, aucune de ses qualités.

#### CE QUE C'EST

#### QU'UN EVENEMENT EXTRAORDINAIRE EN TURQUIE

Malgré les richesses naturelles incontestables de l'empire Ottoman, le Trésor public, nous l'avons dit dans notre article de fond, se trouve depuis un grand nombre d'années dans un état de vide presque continu. On n'a qu'à lire les journaux de Constantinople pour y voir de temps à autre, notamment à la veille du *Ramazan*, la notification d'un fait qui paraît étrange à tous ceux qui ne connaissent pas l'ordre des choses qui règne dans cet Etat vraiment patriarcal. Parmi les nouvelles locales de Stamboul, nous avons lu tout récemment que Sa Majesté le Sultan, dans sa *sollicitude paternelle*, a ordonné au ministre des Finances d'*avancer*, à l'occasion du *Ramazan*, un mois d'appointements à tous les fonctionnaires et employés de l'Etat, sur les HUIT MOIS D'ARRIÉRÉS QUI LEUR SONT DUS !

Cette pénurie du Trésor public acceptée et supportée avec bonhomie par les Osmanlis — qui forment, soit dit en passant, le peuple le plus gouvernable du monde et le plus résigné à son sort — s'appelle le RELEVEMENT DES FINANCES ET DU CRÉDIT DE LA TURQUIE !

#### REVUE DES JOURNAUX

Pour ne pas être taxé d'exagération, en affirmant que le parti de la *Jeune Turquie*, loin d'être mort, commence à s'agiter de plus en plus, nous n'avons qu'à citer les extraits d'une correspondance de la plus haute importance, adressée de Constantinople et publiée récemment dans un journal parisien. L'auteur de cette correspondance dénote un homme qui a une connaissance des plus approfondies des hommes et des choses de la Cour de Yildiz-Kiosk :

« Le palais de la demeure impériale, qui s'appelle « *Yildiz-Kiosk* », débute le correspondant, est une grande construction en pierres couverte de briques rouges, sans style ni élégance. Mais cet aspect modeste n'est qu'un trompe-l'œil. Ce n'est pas le véritable palais impérial, mais le *sélamlik*, ou appartements réservés aux cérémonies officielles de Sa Majesté.

Sa demeure privée, le « *Haremlik* », est dissimulée derrière une triple enceinte de murs énormes, dans l'intérieur d'un parc immense.

Elle est composée de plusieurs kiosques somptueux, pour l'édification desquels rien n'a été épargné... L'or, le marbre, le porphyre, les épais et magnifiques tapis de Smyrne et d'Asie, les glaces, les tentures, les élégantes boiseries, les mosaïques de Florence et de Rome, les lambris et marqueteries, les lustres de Venise, y représentent PLUSIEURS ANNÉES DES REVENUS DE L'EMPIRE !

Nous ne parlerons aujourd'hui que de la première enceinte du palais appelée *Mabéine*, celle qui renferme les départements des ambassadeurs, des chambellans et des secrétaires.

Le *Mabéine* est, à proprement parler, le véritable gouvernement du pays. C'est une petite ville.

Officiellement, le *Mabéine* ne représente que la réunion des secrétaires particuliers plus ou moins nombreux du souverain, des aides de camp, des dignitaires de la cour et de la maison impériale, n'ayant aucun caractère politique ; mais, de fait, ce sont des bureaux jouissant de la plus grande latitude pour contrôler, amender, et rejeter les décisions des administrations de l'Etat auxquelles ils correspondent...

Tous ces bureaux n'agissent que d'après les ordres immédiats du Sultan et ne discutent que pour la forme les affaires qu'on leur soumet ; car sachant d'avance la solution qu'en haut lieu on désire y être donnée, ils ne font que formuler officiellement cette solution. Leur existence sert uniquement à couvrir Abdul-Hamid qui se retranche derrière leur autorité pour faire rejeter les décisions de la Sublime Porte qui n'ont point son approbation et pour imprimer à la politique générale de l'Empire la direction que lui suggèrent ses caprices ou ses intérêts...

De sorte qu'aujourd'hui, la Turquie est un gouvernement essentiellement autocratique...



Ici, le correspondant de l'*Observateur Français*, après avoir exposé la manière d'agir de Sa Majesté le Sultan pour sauver les apparences d'une monarchie constitutionnelle, fait observer :

Si le Sultan actuel agit avec une diplomatie remarquable afin de ne pas blesser les susceptibilités de l'Europe, il observe une conduite toute différente à l'égard du « Divan » — le conseil suprême de l'Empire.

Jamais ce corps d'État qui, dans les siècles passés, a doté l'Empire d'une véritable période de grandeur, n'a été traité avec une désinvolture pareille.

Il n'est pas d'occasion où l'on ne lui fasse sentir le peu de cas qu'on fait de ses délibérations.

Ainsi, quand ces dignitaires, après plusieurs heures de laborieuses discussions, sont parvenus à prendre une résolution décisive relativement à une question urgente, il n'est pas rare de voir arriver du palais un jeune mignon, en uniforme de maréchal, dont la mission est de communiquer l'avis ou, pour mieux dire, l'ordre d'un des bureaux du Mabéine; avis qui se trouve ordinairement en contradiction avec la résolution déjà prise par le Divan : ce qui oblige l'assemblée à prendre une décision radicalement opposée à sa conscience.

On ne peut agir plus cavalièrement envers de vieux fonctionnaires dont la plupart ont quarante ans de services et allient à leur dévouement au trône une expérience consommée des affaires!

Il est facile de prévoir les conséquences résultant d'une politique aussi vacillante — surtout sous un Sultan qui, ne sortant jamais de son palais, ne peut avoir une notion exacte des choses extérieures et qui, outre cela, avec un caractère capricieux et impressionnable, se laisse influencer par les variations du ciel et les prédictions des devins et des astrologues!

Aussi la politique turque est-elle devenue incohérente et changeante du jour au lendemain...

Cela s'appelle faire de la diplomatie machiavélique et il est navrant d'entendre ces jeunes fous du palais faire l'éloge de leur maître qui, d'après eux, serait le génie le plus puissant du siècle et « roulerait tous ces chiens de ghiaours! »

Cependant les faits sont loin d'être d'accord avec ces déclarations ampoulées. Jamais le prestige de l'Empire ottoman n'a été si bas, son influence si faible.

Dans le concert européen, la Turquie est considérée comme un élément de troubles perpétuels; ses finances sont dans un tel désarroi que, depuis 1880, il a été impossible d'élaborer un budget régulier.

Quant au bilan des pertes territoriales, il est désastreux, et c'est le cœur attristé que les amis sincères de la Turquie constatent les catastrophes qui ont ruiné l'empire par suite de ce mode de gouvernement, et l'ont fait rouler de chute en chute jusqu'au bord de l'abîme. De 1877 à 1881 la Turquie a successivement perdu la Roumanie (22 mai 1877), le Monténégro, la Serbie, la Bulgarie (1878) qui sont devenus indépendants, et la Roumélie orientale à peu près déclarée autonome.

L'Autriche, ayant annexé Spuzza, occupe la Bosnie et l'Herzégovine (1878); la Russie tient Kars, Ardaban, Batoum (1878); l'Angleterre a la main sur Chypre et l'Égypte; la Grèce a repris une partie de la Thessalie et de l'Épire (convention du 24 mai 1881); Tunis est sous le protectorat de la France (12 mai 1881); la Perse s'est agrandie du district de Khotour, sans oublier l'indemnité de guerre à la Russie, tache honteuse pour le prestige ottoman. Aussi l'histoire enregistre-t-elle le règne d'Abdul-Hamid comme le plus néfaste parmi ceux des successeurs de Mohammed II. Et la responsabilité de cet état de choses incombe tout entière au Mabéine qui, agissant par tous les moyens possibles sur l'esprit du souverain, lui fausse l'esprit et lui fait suivre une politique qu'il n'adopterait pas peut-être s'il avait son libre arbitre.

L'auteur de la correspondance expose ensuite la conduite du Sultan lors de la guerre de 1877 et ajoute :

Aussi ce n'était pas ce qui se passait sur les champs de bataille, où se décidait une lutte suprême, qui absorbait Abdul-Hamid. C'étaient les faits et gestes de son frère aîné, dont il a usurpé la place et qu'il détient depuis quinze ans enfermé et séparé du reste des humains, qui lui donnaient des insomnies. Aussi l'annonce d'une bataille perdue le préoccupait peu, mais lorsqu'il apprenait que la nouvelle de la bonne santé de Mourad se propageait dans le public et qu'on agitait la question de le rétablir dans ses droits, saisi d'épouvante, il ordonnait d'empoigner les chambellans, les eunuques, jusqu'à des femmes, et de les déporter en masse dans le Yémen. Ainsi se renouvela plusieurs fois le personnel de Mourad, qui, sitôt qu'il s'attachait à quelque serviteur, en

était promptement privé, tandis que ce serviteur était jeté en prison et exilé au loin! Et c'est cette même terreur du rétablissement de son frère que le Mabéine lui avait inspirée, qui poussa plus tard Abdul-Hamid à abandonner l'île de Chypre à l'Angleterre contre la promesse hypothétique d'un appui de cette puissance, au cas où les territoires turcs de l'Asie seraient menacés! C'était, en effet, la clause officielle et, en Europe, on ne comprit rien à cet escamotage d'une île si importante par l'Angleterre. On se demandait, et on le fait encore, comment une nation maritime pourrait jamais protéger des territoires perdus au fond de l'Asie et on taxait le gouvernement turc d'incapacité. C'est qu'on ne connaissait pas la vraie clause de la convention de Chypre, qui est la promesse formelle du concours de l'Angleterre pour Abdul-Hamid, au cas où un parti essaierait de rétablir Mourad sur le trône!

Lors de l'expédition anglaise en Égypte, quand des ouvertures furent faites au sultan, par le cabinet de Saint-James, pour coopérer au blocus d'Alexandrie, ce fut encore le Mabéine qui détourna le sultan d'y prendre part, sous prétexte que la coopération des troupes turques produirait un mauvais effet sur les populations musulmanes de l'Afrique. Prétexte ridicule, comme si autrefois les précédents sultans n'avaient jamais fait d'expéditions contre l'Égypte... En attendant, cette politique a permis à l'Angleterre d'agir à sa guise, et a enlevé à la Turquie l'espoir de recouvrer jamais une souveraineté effective sur les rives du Nil...

Et lors du coup d'État de Philippopoli, n'est-ce pas le Mabéine qui poussa Abdul-Hamid à refuser de laisser expédier en Roumélie sept mille hommes pris dans la garnison de Constantinople, sous le fallacieux prétexte que si l'on dégarnissait la capitale de ses troupes, on exposait le « khalife » aux tentatives criminelles de ses ennemis!... C'est cette abstention de la Turquie qui permit au coup d'État de s'accomplir et à la Roumélie de conquérir son autonomie!

Voilà donc le résultat de la politique du Mabéine, car, ainsi que je l'ai dit, la Sublime Porte n'est plus que l'humble exécutrice de ses ordres.

On voit que nous n'avons rien exagéré dans nos articles de fond. Du reste, tout le monde comprend la gravité de la situation, et si personne n'ose protester contre cette manière de gouverner, c'est que chacun sent peser sur soi un despotisme de mystère; il redoute l'espionnage qui peut le rendre suspect, et tremble en pensant que la délation, comme au temps du Conseil des Dix, à Venise, peut lui faire perdre l'honneur et la vie! Chacun se demande avec anxiété où tout cela peut mener, car tout ne dépend plus maintenant que du Mabéine, qui lui-même n'est qu'un foyer d'intrigues et de corruption, où des scènes de désordre, de dilapidations se commettent journellement.

\* \*

Le correspondant Constantinopolitain du *Temps*, relatant dans tous ses détails l'incident qui s'est produit récemment à Uskub, ville non loin de la frontière serbe, où l'autorité turque a pris la liberté d'enlever les cloches d'une église catholique desservie par des prêtres autrichiens, ajoute qu'outre l'exécution par la Porte de toutes les demandes de l'ambassadeur d'Autriche-Hongrie, le gouvernement ottoman :

a reconnu officiellement le protectorat austro-hongrois sur les églises catholiques situées dans la province de Kossova.

« On s'attend à ce que cette question de protectorat soulève des protestations de la part de l'ambassade de France, qui, aux termes des traités et en vertu d'un privilège établi *ab antiquo*, possède seule le droit de protéger les intérêts catholiques en Turquie, quelle que soit la nationalité de ceux qui ont recours à son action. Il est vrai que, depuis des années, l'Autriche met tout en œuvre pour supplanter la France dans la mission qui lui est dévolue, se soustraire à sa dépendance et éluder les obligations qui en découlent. Mais le protectorat de la France sur les catholiques d'Orient ayant été de nouveau ratifié par le congrès de Berlin et placé conséquemment sous la garantie collective de l'Europe entière, c'est « piler de l'eau dans le mortier » — *pestar l'acqua nel mortaio* — comme disent les Italiens, que tenter d'y porter atteinte. Cependant, il ne paraît pas que notre ambassade soit intervenue dès le début dans l'incident d'Uskub, ce qui a permis à l'Autriche de revendiquer pour elle-même le droit que la puissance protectrice semblait négliger ou abandonner. »



\*  
\*\*

La *Patrie*, en revenant sur le même incident, s'exprime dans ces termes :

La Porte Ottomane qui se pare du titre de Sublime, sans doute parce qu'elle frise tous les jours le ridicule, vient d'essayer une nouvelle bourrasque diplomatique.

Cette fois-ci la chiquenaude lui vient de l'Autriche, puissance alliée, et qui par son dévouement aux intérêts du Sultan a cru utile de le débarrasser de deux de ses meilleures provinces d'Europe.

Le baron de Calice, ambassadeur d'Autriche-Hongrie, mena l'affaire rondement. Il demanda à la Porte une prompte réparation, la révocation du gouverneur, le rétablissement des cloches et des excuses que le nouveau gouverneur ferait en personne au consul autrichien d'Uskub.

Les réclamations de l'ambassadeur austro-hongrois furent exécutées toutes. La Porte même poussa la soumission jusqu'à accorder plus que ne demandait l'Autriche, et que la Turquie ne pouvait accorder. Le gouvernement ottoman reconnut officiellement le protectorat de l'Autriche-Hongrie sur les églises catholiques situées dans le *vilayet* de Kossova.

On connaît bien la manie inqualifiable du sultan Abdul-Hamid de céder au plus audacieux des restes des grandes possessions en Europe que lui ont léguées ses illustres prédécesseurs, les créateurs de l'empire ottoman. Cette fois-ci seulement il est allé trop loin.

Le protectorat de la France sur les catholiques d'Orient ayant été de nouveau ratifié par le Congrès de Berlin, ni le Sultan ni la Porte n'ont aucun droit d'y porter atteinte. Libre au Sultan de céder, sans y être forcé par la défaite, Chypre aux Anglais, la Bosnie et l'Herzégovine aux Autrichiens et n'importe quel autre joyau de sa couronne, — mais il ne devrait ni ne saurait céder à d'autres ce qui ne lui appartient plus.

Il faut espérer que la France s'opposera à cet acte inqualifiable et qu'elle mettra fin sur ce point du moins, à la prodigalité d'Abdul-Hamid.

Nous sommes désolés de constater une nouvelle humiliation infligée à l'amour-propre ottoman. Le gouvernement turc a la malheureuse habitude de ne jamais livrer à la publicité aucun document diplomatique qui pourrait éclairer l'opinion. La satisfaction obtenue par l'Autriche nous paraît tout au moins exagérée ; mais comment discuter et défendre les droits ottomans, si souvent méconnus, lorsqu'on n'a pas les éléments du débat sous les yeux ? Nous savons par expérience que les ambassadeurs en Turquie abusent souvent de leur situation et que la Porte cède à tort et à travers, devant la force brutale plutôt, même quand elle a le droit pour elle, que devant la raison et la justice des réclamations des parties lésées, ce qui donne lieu à de si fréquentes humiliations nationales aux Turcs. Le gouvernement ottoman se trompe par conséquent étrangement s'il prend pour de la faiblesse les ménagements et la condescendance que le gouvernement de la République se plaît à mettre dans ses rapports avec la Porte.

\*  
\*\*

On écrit de Salonique aux *Kairi* d'Athènes que le secret des lettres est violé dans la poste turque. Les fonctionnaires ottomans ne se font aucun scrupule d'ouvrir les lettres adressées à des particuliers, et ils le font avec une si grande maladresse que les traces de leur crime sont évidentes sur l'enveloppe.

En signalant ce fait, notre confrère athénien ajoute que l'Union postale devrait être saisie de cette scandaleuse affaire.

Semblable indécence de la part d'une administration ottomane ne nous étonne aucunement. Mais que dire des préposés d'une grande puissance civilisée, qui, d'après ce qu'on nous écrit de Constantinople, serviraient de mouchards au gouvernement turc en interceptant, sur ordre de celui-ci, la correspondance privée ? L'on sait qu'en vertu des capitulations, les grandes puissances possèdent en Turquie des bureaux de poste *inviolables* par les autorités locales.

On nous écrit pourtant de Constantinople :

«... Les employés de la poste X (on nous indique la nationalité),

étant pour la plupart des Pérotés, sont vendus au gouvernement (turc) et lui livrent les lettres, adressées de l'Europe à des personnes que celui-ci cherche à accuser par tous les moyens... L'honneur du gouvernement européen, qui emploie ces Levantins à son service, est sacrifié aux intérêts illégitimes de certains coquins qui cherchent à couvrir leur infamie derrière le rideau de l'honnêteté de la puissance qui leur procure la qualité de... »

Nous avons reproduit les propres termes de la lettre qui nous a été adressée.

\*  
\*\*

Nous extrayons d'une correspondance adressée de Constantinople au *Temps* le récit suivant :

Avant-hier, samedi, un très regrettable incident s'est produit à Péra, tout près de la préfecture de police et en vue du poste militaire qui y monte la garde.

M. Baroni, premier drogman de l'ambassade d'Italie, et M<sup>me</sup> Baroni, allant faire une promenade à cheval, venaient de se mettre en selle à côté de Galata-Sérai, lorsque plusieurs des soldats Kurdes nouvellement arrivés à Constantinople se ruèrent sur les cavaliers. Tandis que les uns saisissaient M<sup>me</sup> Baroni et la jetaient à bas de sa monture, d'autres s'attaquaient à M. Baroni, qu'ils précipitèrent sur le pavé. M<sup>me</sup> Baroni perdit connaissance ; mais, grâce à l'attitude énergique des passants, elle put être portée dans une maison voisine où on lui donna les soins nécessaires. Quant à M. Baroni, il fut légèrement blessé à la tête.

L'ambassade d'Italie a envoyé à la Sublime-Porte une note exigeant satisfaction immédiate. Le grand-vizir transmit sur-le-champ ses remontrances au *séraskiéral* (ministre de la guerre), et, comme Kiamil-Pacha avait, dès le principe, blâmé le projet d'appeler des Kurdes à Constantinople, il a beau jeu, aujourd'hui, pour rejeter les responsabilités sur qui de droit.

Le sultan déplore cet incident qui pourrait bien être suivi d'autres semblables, sinon pires encore, car tout est à craindre avec des sauvages comme les Kurdes. Aussi bien, dans une ville comme Constantinople, où les étrangers sont très nombreux et où le fanatisme n'est pas plus de mise que les facéties brutales, la présence de ces Asiatiques constitue un péril réel. Il ne faudrait pas beaucoup de faits du genre de celui de samedi dernier pour motiver une démarche collective des ambassades et légations, à l'effet d'obtenir l'éloignement de ces bandes dangereuses.

L'éloignement de ces Kurdes, bandits guerriers, favoris de S. M. le sultan Abdul-Hamid, rassurera naturellement les habitants de Constantinople et permettra aux familles des représentants et agents des puissances de se promener à Péra, même à cheval. Mais on ne nous dit pas quelle mesure comptent prendre les gouvernements de l'Europe civilisée pour garantir enfin l'honneur et la vie de tant de malheureuses populations, abandonnées sans défense et sans protection à la rapine et aux violences les plus cruelles de ces hordes barbares qui dévastent l'Arménie.

Le fameux Kurde Moussa bey jouit non seulement de l'impunité dans son soi-disant exil, *exil pour la forme*, mais il constate avec un légitime plaisir que ses anciens compagnons et complices sont invités par le sultan à l'*Iftar* (à dîner) au Palais de Yildiz-kiosk.

\*  
\*\*

Le correspondant viennois du *Times* reproduit une longue lettre datée de Sofia dans laquelle se trouve décrite la torture qu'on a fait subir à un charpentier serbe, soupçonné de complicité dans l'affaire de l'assassinat Beltchef. Le malheureux, n'ayant pu faire des aveux, avait été dépouillé de ses vêtements jusqu'à la taille, lié et hissé dans l'air, après quoi un gendarme, armé d'une canne, lui avait labouré le flanc pendant une demi-heure !

Après avoir été relâché, le charpentier s'était rendu à demi-mort au siège de l'agent de Serbie. Là, plusieurs parmi les représentants des puissances étrangères à Sofia ont pu le voir ; son état était des plus lamentables et son corps ne formait qu'une plaie.

L'auteur de la lettre ajoute :

« Les diplomates étrangers se sont demandé avec raison de quelle manière sont traités les prisonniers bulgares, si des étrangers, protégés



par des capitulations, subissent des traitements pareils à celui dont nous venons de parler. »

\* \*

Un personnage très bien placé à Sofia pour connaître exactement ce qui se passe dans ce pays des *ingrats* vis-à-vis de leurs bienfaiteurs et libérateurs, écrit à la *Revue Diplomatique* :

Ici rien n'est changé en fait de gouverner... soit avant ou après l'attentat, la terreur est la base de soutien du grand (*sic*) homme d'État bulgare... et s'il y a quelqu'un qui a, peut-être, le plus regretté que les balles du revolver aient manqué leur but, certes, on peut dire que c'est le prince Ferdinand, croyez-le ! Pour décrire tout ce qui se passe ici d'illégal et de barbare de la part de la police, ce serait trop long et même incroyable pour le monde civilisé. Voyant que les fauteurs lui ont échappé, dans sa rage d'hyène, l'homme criminel (Stambouloff) ne met plus de bornes à sa persécution contre tous ceux qu'il soupçonne même de ne pas partager sa façon de gouverner, et malmène ce pauvre peuple. Il y a eu plus de 600 arrestations à Sofia, sans parler de celles qu'il a fait opérer dans les principales villes et il y a encore grand nombre d'innocents qui gémissent dans les cachots humides et malpropres sans même avoir encore jusqu'à présent subi le moindre interrogatoire ! La plupart de ces victimes sont des ex-ministres, des fonctionnaires et des personnes indépendantes, qui ne sont pas obligés pour vivre de solliciter des postes et emplois à l'homme terrible. Malgré tout cela, il se trouve en Europe des écrivains et des journalistes qui acclament cet homme, applaudissent à ses méfaits et, ce qui est pis encore, appuient ses demandes d'abolir les capitulations !!! *O tempora, o mores !* Tous ceux qui sont témoins du lamentable spectacle que présente ce pauvre et malheureux pays en accusent les puissances. En effet, si certains agents diplomatiques n'encourageaient pas par leurs conseils occultes, par leur approbation tacite, par l'intimité de leurs rapports personnels avec le terroriste, la politique de cet homme néfaste, croyez-vous qu'il oserait, au mépris du monde civilisé, agir comme il le fait, bravant impunément les lois et la justice ?

Nous pourrions ajouter sans être taxés d'exagération que l'honorable correspondant a omis la cause principale des crimes qui depuis trois ans ensanglantent la malheureuse Bulgarie. C'est l'apathie inqualifiable du gouverneur ottoman et de la Cour suzeraine du Sultan qui protège les usurpateurs en Bulgarie et les couvre par cela même d'impunité. On se porterait à croire la Porte *Sublime* de connivence avec Cobourg-Stambouloff et C<sup>ie</sup>.

## LETTRÉ DE TURQUIE

Correspondance particulière de la *Turquie Contemporaine*.

Constantinople, le 25 avril 1891.

En publiant votre journal vous ne vous êtes pas sans doute attendu à ce qu'il produisît un grand plaisir dans notre pays. Il se peut même que vous vous fussiez attendu à tout le contraire.

Eh bien, soyez tranquille. La *Turquie contemporaine* a produit son effet, et un effet auquel on n'aurait pu s'attendre. Ceux qui l'ont lue de la part du peuple en ont été enchantés. J'ai vu même pas mal de nos *Sophtas* s'arracher l'exemplaire turc et, après l'avoir lu avec avidité, s'exclamer : « Il a raison le ghiaour ! Notre vie n'est pas aussi heureuse qu'on veut la faire passer en haut lieu ! Nous sommes aussi opprimés que les raïas, et même plus, car ceux-ci ont pour eux les *Eltekis* (ambassadeurs), qui les défendent, tandis que nous, nous restons exposés à toutes les iniquités de nos gouvernants sans que quelqu'un lève la voix en notre faveur ! »

Voilà ce que nos *Sophtas*, eux-mêmes, se disent dans leur intimité. Cela doit suffire à la Rédaction de la *Turquie contemporaine*, car il prouve surabondamment qu'elle a gagné d'emblée les sympathies de tout le monde, surtout de nos compatriotes *lettrés* du parti religieux.

Quant aux sphères gouvernementales, celles que vous appelez

si justement : « AGOP, RAGHIB ET C<sup>ie</sup> », l'éclat d'une bombe en plein Yildiz-Kiosk n'aurait pas produit l'effet de votre journal qui leur tombe au beau milieu d'un festin de *Ramazân*. Ce fut un effarement, d'autant plus terrible que l'on a appris en même temps l'arrivée d'exemplaires de votre journal en langue turque.

Si du moins c'était seulement en français, — se dit-on dans les sphères du Palais et de la Porte — on pourrait encore y rester indifférent. « Les ghiaours lisent tant de choses que les Francs écrivent contre nous, que cela ne nous touche plus. Mais que les Osmanlys lisent de pareilles vérités, c'est grave !.. »

J'ai appris que l'apparition à Constantinople de votre journal a fait l'objet de longs conciliabules parmi les ministres et les hauts fonctionnaires ; mais aucune entente n'a pu se faire encore là-dessus. Ce que je sais c'est que S. A. Kiamil Pacha est furieux contre Munir-bey, Mektoubji, ce trop élégant fonctionnaire des affaires étrangères, qui lors de sa récente mission à Paris, télégraphiait ici à qui de droit qu'il avait *dans sa poche* les journaux parisiens et que désormais aucun journal contraire à la Porte ou au Sultan n'oserait élever la voix à Paris ! Le grand vizir trouve que les résultats dérisoires obtenus par Munir-Bey à Paris et que l'entretien trop coûteux d'un représentant du bureau de la presse Turque en France sont autant de fous que la Porte doit à la haute intelligence de cet aspirant problématique au poste d'ambassadeur ottoman.

J'apprends aussi que dans les ambassades on rit beaucoup de la mine piteuse des chefs de la police et de nos espions qui n'ont pas su découvrir de quelle manière s'est faite la propagation de votre journal dans notre capitale et dans les provinces, et que des perquisitions ont été ordonnées dans certains centres où se réunissent quelques partisans de Midhat.

Le plus piquant de tout c'est que bon nombre de hauts fonctionnaires du Palais, tenus en dehors de ce que vous appelez si justement la commandite : *Agop, Raghib et C<sup>ie</sup>*, sont enchantés de la publication de votre journal !

Je vous donnerai prochainement des détails plus circonstanciés.

HALIL.

## LETTRÉ DE RUSSIE

Correspondance particulière de la *Turquie Contemporaine*.

Saint-Petersbourg, 26 avril.

C'est avec un plaisir des plus sincères qu'on a reçu et lu ici le premier numéro de la *Turquie Contemporaine*. La franchise avec laquelle la rédaction expose son programme et le contenu de ce premier numéro qui entreprend vigoureusement et sans hésitation la défense des malheureuses populations de l'Empire Ottoman ont beaucoup plu à notre société. On est très content de voir qu'il se soit trouvé un fils de l'Asie-Mineure se vouant exclusivement à la défense des intérêts de peuples opprimés qui n'ont pas encore pu attirer l'attention des publicistes impartiaux.

La Russie s'est montrée de tout temps intéressée au développement des populations de l'Empire Ottoman. Elle l'a montré par une série de guerres contre la Porte, entreprises toutes pour la défense des peuples opprimés par l'arbitraire des satrapes ottomans qui ne se sont jamais souciés que de s'enrichir aux dépens des malheureuses populations. Toutes ses guerres se sont terminées par l'affranchissement de tel ou tel peuple, et si le gouvernement impérial s'annexait aussi quelque partie du territoire ottoman — c'était d'abord pour compléter le retour à la mère patrie des membres épars de la grande famille et en second lieu, pour assurer ses frontières des incursions de peuplades sauvages et portées au brigandage, comme par exemple les Kurdes.

Comprenant le vice de l'organisation politique de l'État ottoman, la Russie a toujours stipulé dans ses traités avec la Porte la concession de certains droits politiques et administratifs à des



populations chrétiennes soumises à la Porte. Si elle n'a jamais demandé des droits particuliers pour des musulmans, c'est que les Sultans se donnent le titre de Kalifes de l'Islam, il devenait superflu de demander des privilèges à la race conquérante.

Cela ne veut pas dire que la Russie ignorât le triste état dans lequel se trouvaient les Osmanlys malgré le titre pompeux d'Empereur des Ottomans qu'ont pris les Sultans. Les ambassadeurs russes ont toujours tenu le gouvernement impérial au courant de l'oppression inqualifiable que subissaient les fidèles du Koran et la rapacité des fonctionnaires turcs qui trop souvent s'exerce aux dépens des Ottomans eux-mêmes. Mais elle n'avait aucun titre de s'interposer entre le Kalife et les musulmans et de demander pour ces derniers des droits que le titre de Kalifat était censé lui assurer envers et contre tout le monde.

Vous comprenez, par conséquent, le plaisir qu'a dû causer à notre gouvernement l'apparition d'un journal qui se voue à la défense de toutes les races et tous les cultes peuplant la Turquie; des Chrétiens comme des Musulsans, des Raïas comme des Ottomans.

La Russie ayant toujours considéré l'Empire Ottoman comme un facteur nécessaire à l'équilibre européen, elle serait bien heureuse de voir le progrès des populations de cet empire et le développement normal de ses forces comme une *conditio sine qua non* de la paix et de la prospérité générale.

Malheureusement la Porte Ottoman ne comprend ainsi ni sa mission, ni ses devoirs envers ses peuples ni l'Europe. Elle a l'air de vouloir démontrer à tout le monde et surtout à la Russie dont elle doit connaître mieux que tout autre la colère, que la politique des Kalifes est à côté de la logique.

Au lieu de chercher loin, prenons deux exemples sous la main. Malgré les traités qui assurent au Sultan la suzeraineté sur la Bulgarie, la domination sur la Roumélie orientale, la Porte tolère dans la principauté et dans la province privilégiée un ordre de chose en flagrante contradiction avec ses droits et en violation des traités existants. Elle ne s'oppose pas au maintien d'un aventurier à Sofia qui y règne comme un prince régulier et légitime et ne l'empêche pas d'usurper le gouvernement de la Roumélie Orientale.

En même temps elle s'oppose au passage d'un bateau à vapeur de commerce russe à travers les détroits des Dardanelles et du Bosphore, sous le prétexte que ce navire est chargé d'armes et que cela fait une contravention aux traités existants.

En un mot elle fait litière des droits de suzeraineté et de souveraineté du Sultan de Bulgarie et Roumélie et cherche chicane à une puissance qui connaît depuis longtemps le chemin qui mène à Stamboul.

Je vous demande où est donc la logique dans cette conduite de la Porte? N'est-il pas évident que les ministres anglophiles du Sultan, à commencer par le trop fameux Kiamil-Pacha, cherchent à pousser la Turquie à une nouvelle invasion russe?

Je m'arrête là aujourd'hui. Prochainement je consacrerai mes devoirs de chroniqueur régulier de la vie politique et sociale russe.

PH.....

## NOUVELLES DIVERSES

Le *Temps* a reçu le télégramme suivant :

La police a arrêté dans des maisons mal famées et des cabarets de Péra vingt-huit Turcs, dont douze attachés du palais. Le sultan ordonna aussitôt que quiconque enfreindrait le jeûne du Ramazan ou fréquenterait des maisons publiques serait exilé à Tripoli d'Afrique. Les coupables arrêtés resteront emprisonnés jusqu'au second jour du Baïram.

Vendredi, le sultan est allé à la mosquée de Sainte-Sophie. Un individu poussa des cris sur le passage du sultan, qui prit peur. La police

arrêta l'individu, mais la prière, qui dure ordinairement près d'une heure, a été expédiée en vingt minutes. Le sultan gagna aussitôt Top-Kapou pour la cérémonie de la vénération du manteau du Prophète et y resta jusqu'à 9 heures du soir, toujours tremblant et ému.

Ce télégramme a produit une fâcheuse impression. Depuis son avènement au trône, le sultan Abdul-Hamid ne s'était plus éloigné de Yildiz-Kiosk. Cependant en dernier lieu, rompant avec ses habitudes de quasi claustration volontaire, il s'était rendu aux eaux douces d'Europe. Ce fait fut favorablement accueilli par le public de la capitale, et les personnes les plus sincèrement dévouées à Sa Majesté se mirent à espérer qu'Elle se déciderait enfin à reprendre les nobles traditions de sa maison dont invariablement tous les membres régnants avaient pour constante règle de conduite de se faire fréquemment voir en public. L'illustre grand-père du sultan actuel, le sultan Mahmoud, le grand Réformateur de la Turquie, malgré les inimitiés qu'il avait entassées autour de lui par la guerre contre les insurgés grecs, par la destruction presque complète des Janissaires, par les guerres malheureuses contre la Russie et Mehmed-Ali, avait le courage de se montrer à ses sujets en se promenant dans sa capitale seul ou simplement accompagné par un aide de camp. Ses deux fils les sultans Abdul-Medjid et Abdul-Aziz, père et oncle du sultan actuel, sortaient plusieurs fois par semaine à cheval, en voiture ou en *caïque*. Les populations ottomanes furent donc humiliées en constatant que le sultan Abdul-Hamid ne semblait pas avoir suffisamment confiance en elles, et elles attribuaient à un manque de courage, inconciliable avec la bravoure nationale et la vaillance traditionnelle des princes de la maison d'Osman, cette attitude si extraordinaire d'un souverain, d'ailleurs intelligent. Malgré toutes les apparences, nous persistons encore à croire que des courtisans ayant un intérêt personnel à entretenir les méfiances du sultan sont cause d'un état de choses aussi déplorable et nous voulons espérer que Sa Majesté prendra enfin le parti de circuler à l'instar de ses glorieux prédécesseurs.

Un journal, ayant des rapports *indirects* avec le gouvernement ottoman, publie le communiqué suivant sous forme de *Dépêche* de Constantinople :

### LES CONCESSIONS EN TURQUIE

CONSTANTINOPLE, 27 avril. — Une dépêche de source autrichienne annonçait dernièrement que le grand-vizir, Kiamil-Pacha, aurait présenté au sultan un rapport ayant pour objet de critiquer l'immixtion de certains hauts fonctionnaires de l'entourage du souverain dans les affaires publiques et surtout dans les questions de concessions.

Il n'y a pas un mot de vrai dans ces racontars, et le grand-vizir n'a présenté aucun rapport de ce genre.

Tous ceux qui sont un peu au courant des affaires turques n'avaient pas sérieusement cru que le grand-vizir Kiamil-Pacha aurait osé adresser un semblable rapport au Sultan; mais c'est vraiment se moquer du monde que de nier l'immixtion de certains hauts fonctionnaires du Palais dans des questions de concessions, etc. ! Nous ne voulons pas citer des noms, mais à Constantinople on sait que tel personnage qui n'avait pas le sou à l'avènement du Sultan actuel a aujourd'hui dix millions de francs, somme énorme pour la Turquie; tel autre en a cinq en propriétés bâties; tel autre, sans ressources avouables, mène un train fastueux de Nabab, etc. Il est inutile de multiplier les citations. On nous comprendra; mais il est ridicule de communiquer à la presse parisienne, avec un tel sans-gêne, des rectifications qui tout au plus font sourire.



# SMYRNE ET L'ASIE MINEURE

AU POINT DE VUE  
ÉCONOMIQUE ET COMMERCIAL  
PAR

Démétrius GEORGIADIS

Avec préface de  
M. Arthur MANGIN

OUVRAGE

Accompagné d'une Carte de l'Asie Mineure  
et d'un Plan de la ville de Smyrne.

Cette monographie, de 268 pages in-8, dédiée  
par l'auteur à

M. FÉLIX FAURE  
Député de la Seine-Inférieure,  
Ancien Sous-Secrétaire d'Etat au Ministère de la Marine  
et des Colonies,  
Ancien Consul de Grèce au Havre,  
Membre de la Chambre de Commerce du Havre,  
etc., etc., etc.

est divisée en trois parties, savoir :

## PREMIÈRE PARTIE

Description physique, agriculture, commerce,  
industrie, état social et intellectuel, adminis-  
tration, statistique commerciale et maritime,  
comprenant la période des 50 dernières années.

## DEUXIÈME PARTIE

L'ancien commerce de Marseille avec les Échelles  
du Levant, depuis Colbert jusqu'au commen-  
cement de notre siècle.

## TROISIÈME PARTIE

Le Commerce français avec l'Orient. Causes de  
son infériorité et remèdes.

Prix : 7 francs.

Chez MM. CHAIX ET C<sup>ie</sup>, 20, rue Bergère.  
GUILLAUMIN ET C<sup>ie</sup>, 14, rue Richelieu,  
et à la rédaction de ce journal

Le livre est envoyé franco contre remise du  
montant en chèque ou mandat-poste.

# COMPAGNIE INTERNATIONALE DES WAGONS-LITS

ET DES

## GRANDS EXPRESS EUROPÉENS

Agence de la Compagnie : Place de l'Opéra, 3

Trains de luxe. -- Wagons-lits. -- Wagons-  
Restaurants circulant sur tous les réseaux  
de chemins de fer européens.

MM. les Voyageurs trouveront aux agen-  
ces de la Compagnie :

- 1° Places de trains de luxe et de Wagons-  
lits (Sleeping-Car) réservées à l'avance ;
- 2° Billets de chemins de fer pour toutes  
les destinations ;
- 3° Enregistrement des bagages ;
- 4° Billets pour les principales lignes de  
paquebots ;
- 5° Renseignements gratuits dans les  
diverses langues.

# L'ÉCONOMISTE RUSSE

## JOURNAL DE STATISTIQUE

FINANCIÈRE, COMMERCIALE  
INDUSTRIELLE ET AGRICOLE

PARAISANT EN FRANÇAIS

LE 1<sup>er</sup> ET LE 15 DE CHAQUE MOIS

Rédaction et Administration :

RUE ZNAMENSKAÏA, 43

A

SAINT-PÉTERSBOURG

L'ÉCONOMISTE RUSSE publié par M.A.  
VESSÉLOVSKY, l'éminent économiste russe,  
qui occupe avec distinction d'importantes  
fonctions au ministère des Finances à Saint-  
Petersbourg, comble une lacune dans la  
presse russe, faisant connaître à l'étranger  
les immenses richesses du vaste empire des  
Tsars, ainsi que le développement prodigieux  
de l'industrie et du commerce de la Russie.

LA

# REVUE FRANÇAISE

DE L'ÉTRANGER ET DES COLONIES

ET

## EXPLORATION

GAZETTE GÉOGRAPHIQUE

PAR

M. EDOUARD MARBEAU

Directeur-Fondateur  
Ancien Auditeur au Conseil d'État.

S'ADRESSER :

1, Place d'Iéna, PARIS

NOTA. — Cette Revue mensuelle est très  
répandue dans le monde politique, industriel  
et commercial.

9173-91. — CORBELL, Imprimerie Castré.

# MAISON ORIENTALE

DEM. J. ZACCHIRI

13, Avenue de l'Opéra, 13

SUCCURSALES :

40, 42 & 58, Boulevard Haussmann

Meubles de styles, Rideaux, Tentures,  
Couvre-lits, Dos de pianos artistiques ri-  
chement brodés.

Broderies anciennes, Tapis de Smyrne,  
de Perse, de Daghestan, de Khiva et de  
toutes autres provenances d'Orient.

GRAND CHOIX

au DÉPOT, 5, avenue de l'Opéra

La Maison se charge, grâce à l'orga-  
nisation de ses ateliers, de toutes sortes  
d'installations et de décorations d'hôtels  
particuliers, d'appartements, de théâtres  
et spectacles, etc., etc., à des prix très  
modérés.

# MESSAGERIES MARITIMES

ADMINISTRATION :

PARIS — 1, rue Vignon — PARIS

DIRECTION GÉNÉRALE :

2, quai de la Joliette — MARSEILLE

## PAQUEBOTS-POSTE FRANÇAIS

Les plus beaux, les plus spacieux, les plus  
confortables, les plus rapides paquebots de la  
Méditerranée.

Ligne de Constantinople. Départ de Marseille  
chaque samedi à 4 heures du soir.

Ligne de Grèce, de Syrie et d'Égypte. Départ  
de Marseille chaque semaine, le samedi, à  
4 heures du soir.

Rabais de 10 p. 100 pour les passagers qui  
prendront des billets d'aller et de retour. Les  
familles composées de 3 personnes au moins  
jouissent d'une remise de 10 p. 100. Cette remise  
est de 15 p. 100 pour les familles prenant un  
billet d'aller et de retour.

# CLIO

LE PLUS SÉRIEUX  
JOURNAL PÉRIODIQUE ILLUSTRÉ

Pour Familles

PUBLIÉ EN LANGUE GRECQUE

à LEIPZIG

ADRESSE :

An die Administration der CLIO  
LEIPZIG

Le Gérant : J. CHARLES.
