# Supplementary material
Source: Research Square preprint supplement (doi:10.21203/rs.3.rs-9653111/v1)
Supplement: Supplementary file 8 [file ttk_mizan_1897_0001.pdf › Primary Sources/ttk_mizan_1897_0001.pdf]

**MIZAN (LA BALANCE)**  
ORGANE DE LA JEUNE TURQUIE  
JOURNAL HEBDOMADAIRE

ADRESSE :  
**DIRECTION MIZAN**  
14, Rue des Ecoles — Paris

ABONNEMENTS :  
UN NUMÉRO 50 centimes  
UN AN 23 francs  
AVEC SUPPLÉMENT

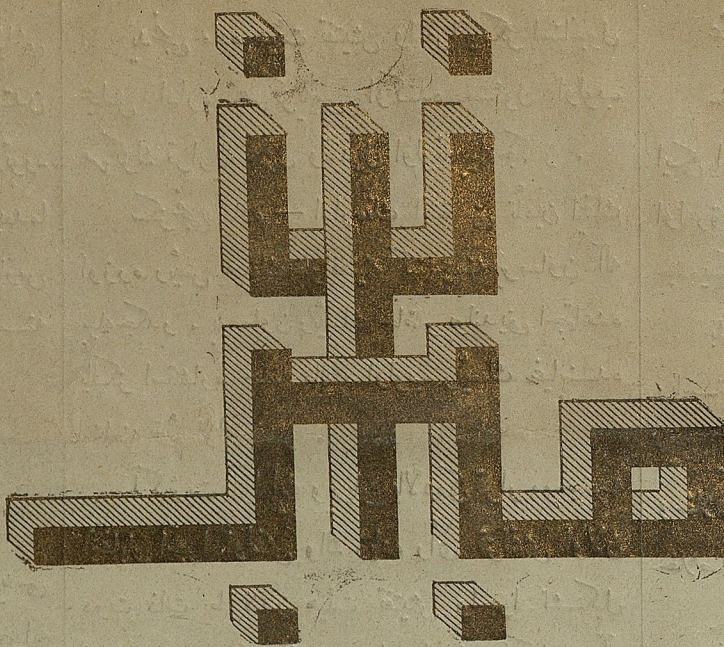

عثمانی اتحاد و ترقی جمعیتک واسطه نشریاتیدر

سنهك آتونهی :

برعثمانی لیراسی ( ۲۳ فرانق )

نسخههی ۲ غروش ( ۵۰ سانتیم )

« علاوه لریله برابر »

آدرس : ( میزان ) اداره خانههی

**DIRECTION MIZAN**  
14, Rue des Ecoles — Paris

هفته ده بردفعه نشر اولنور

اتحاد و ترقی ، امنیت و معدلت ، اصول مشورت ، حاکمیت ملت ، وظیفه و مسئولیتده مساوات

### مندرجات

قارئلره اخطار مخصوص — افاده مخصوصه —  
تیلیغات ( قرار ، اعلان رسمی ، بیاننامه ) مکاتیب  
وادبیات ( استانبولدن وروم ایلیدن مکتوب )  
اوراق حوادث ( حقیقت ) — میزان تقرقههی  
( وصیتنامه سیاسی ) .

### قارئلره اخطار مخصوص

وطنك داخلی و خارجی دشمنلرندن استخلاصی  
مقصد واملنده بولنان جمعیتمز احوالك کسب ایتدیکی  
وخامته نظراً نشریات و معاملاتنه دهها زیاده اطراد  
وانتظام ویرمکه قرار ویرمش و بوجهلندن اولهرق  
( مشورت ) ك خارج قارشو واسطه مدافعه مقامنده  
یالکر فرانسزجهیه حصریله ترکیه رسمی مروج  
افکاری اولوق اوزره ( میزان ) ك جمعیه ترکی  
طلب ایلمشدر . جمعیتك هرامر وطلبی منسوبینی  
ایچون مقدسدر . بونك ایچون یامصرده ویاستانبولده  
نشر اولنهحق اولان ( میزان ) جمعیت طرفندن  
تعین اولنان برهیئت تحریریله حسن وادارهسنه  
ترك اولمشدر . بوندن فی مابعد ( میزان ) ه یازی  
یازمیهجیم معناسی چیقارلسون . وظیفهم سکوت  
ایتمکلمی مانعدر . ( میزان ) بوکوندن اعتباراً  
صرف واسطه افکار مخصوصهم دکدر . جمعیتك  
تحت مسئولیتده نشر اولنان رسمی برواسطه  
افکاریدر . فقیر دخی جمعیه منسوبیت ایله مشرف  
ومفتخر بولندیغمدن مطلوبنه موافق صورته قلمی  
استعمال ایدهجکم طبعی وضروریدر .

محمد مراد

### افاده مخصوصه

جمعیتمزك خدمت نشریهیه باشلامامی هنوز بر  
سنه اولیور . بیک درلو صعوبتلر ، مانعهلر قارشو-  
سند دواوم خدمتده بویوك برمئانت وقوت کوستردیکی  
کی شمدی ده سنه دوریه اولوق ملابسسه سیله وظیفه  
نشریهیه برقات دهها توسیع ایتدی . باشقه برشکل  
ویردی . اساسی برقات دهها قوتلشدیردی .

بوکره جمعیتمزك مقام ریاستنه کچن مجاهد حیت  
سیرت مراد بك افندیك مصری ترك ایدوب پارسه  
مواصلت ایلدککری کوندنیری میزانك انتشاری آرزو  
ایدلکده وكفه حقانیت وعدالتك معطل ومتروك  
طورماسنه کوكلر راضی اولمامقده ایدی . بونك  
اوزرینه بر جمعیتك ایکی واسطه نشریاتی اولماسنه  
حاجت کورلیوب مشورتك یالکر خارجه قارشو  
فرانسزجهیه حصر ووقفیه ترکیه اولهرق میزانك  
واسطه نشریات اولماسنه قرار ویرلدی . مراد بك  
افندی دخی هر درلو حقوق وامتیاز ذاتیلرندن واز-  
کچوب — عن قریب استانبوله دونولنجه اعاده اولنوق  
شرطیه — اومحترم غریبهی ( عثمانی اتحاد و ترقی  
جمعیت ) ترك وهدیله ایلدیلر .

امور تحریریله دخی درت کشیدن مرکب اولان  
هیئتمزه حواله وتودیع اولندی . له الحمد سایه غیرت  
وحیتمده مطبعهجه اولان نواقصمزی اكمال واصلاح-  
تمزی اجرا ایدوب چوق شکر ( میزان ) ی ینه  
ساحه عدالته چیقاردق . مشورت اونش کونده بر  
نشر اولنیوردی ، میزان بمنه تعالی هر هفته انتشار  
ایله جکدر . جمعیتمزك رسمی واسطه نشریاتی

اولدیغی جهته کفه لری بالمله اخوان ومحبان ایچون  
آچیق وسربستدر . اغراضدن خالی اولوق شرطیه  
ایستدککرینی وضع ایله وزن ایده بیلیرلر .

یالکر شونی عرض واسترحام ایلرزه « میزان »  
بلا استننا وطنك هر برکوشه سندن کلان فریادنامه لری  
حاوی اوله جفندن کوندریله جك مقالاتك ممکن  
مرتبه ، صوك درجه ده مختصر اولماسنه دقت ونمونه  
ادبیات اولمقدن زیاده تصویر حقیقت جهتی نظر  
دقت اوکنده بولوندیروب آچیق وممكنسه برکویلیك  
بیله اکلایه جنی قیلقدده یازماسنه همت ایلمیلیر .

هویتلری نامعلوم و آدرس لری مجهول ذواتك  
ویره جککری حوادث ایچنده دوغرو لغه قانع اوله-  
مدقلمرمزی حسب الضرور درج ایتکده معذورز .  
بوخصوص ایچون پشیندا عفو طلب ایدهرز .

اخوان ومخابرلرمزه سیئات اداره نك کراتله  
یازیلوب سویلنمش جهتلریله قلملرینی یورماملرینی و  
هر درد ایله برابر مقابله نصل بر درمان بولونه بیسه-  
جککنی دخی علاوه ایلملرینی یالواریرز .

وطنداشلرمزی غفلتدن ایقاظ ایچون خداجمله مزه  
توفیق صمدانیسینی رهبر ایله سین آمین .

هیئت تحریریله

### ( تیلیغات )

قرار

هیئت تقیش واجرانك ایلک اجتماعنده جمعیتمزك  
پارس شعبه سنجه تبدیلاب ویکیدن انتخابات اجرا ایدیلوب  
التباسه محل قلامق اوزره جمعیتك بالمله شعبه لریله  
مدیریت نامی ویرلمش وپارس شعبه سی مدیریته دخی



قدرت و حیثیتی جمله معروف اخوانزادین بیکباشی احمد بک و صدق امینلکنه دخی نه فداکاران امتدن دوقور اسحق افندی و مخاربه کتابتبه دخی غیرتور. اندن ناظم افندی انتخاب و تعیین ایدلشدر . بعدما جمعیت و غزته امور و خصوصاتی ایچون پارس مدیریتک غزته مرکز بالاسنده محرر یکی آدرسنه مراجعت ایدلی توصیه ورجا اولتور .

### اعلان رسمی

عثمانلی اتحاد و ترقی جمعیتک اداره مرکزیهسی مجلسی طرفندن بودغه اتحاد اولوب موقع اجرایه وضع اولتان قراردر .

برنجی ماده — عثمانلی اتحاد و ترقی جمعیتک استانبول مجلس اداره مرکزیه سنک وکالت مطلقه سنی خاخر بولونق و احوال حاضره نك تبدیلیه اداره نك کلیاً استانبوله نقلنه قدر وطنك داخل و خارجنده کی شعبه لره نظارت ایتک اوزره بر هیئت تقشش و اجرا تشکیل اولوتشدر .

ایکنجی ماده — هیئت تقشش و اجرا اوج منتخب اعضا و برریش ایلده برده رئیس معاونندن عبارت اولوب جمعیتک کافه اموری نظامنامه نك احکامی دائره سنده و کندی مسئولیتاری تحتنده اداره ایده جکدر .

اوجنجی ماده — هیئت تقشش و اجرا رئیس امور و معاملات رسمیه سنده هیئتک تصمیم رأی و موافقتیه حرکت ایده جکدر . رئیس خارجه قارشو جمعیتک مرخصی مقامنده اولوب وکیل مطلق صقیله مناسبانده بولونه حق و « عثمانلی اتحاد و ترقی جمعیتک مرخصی *Délégué général du parti de la Jeune Turquie* » دیره ک امضاسنی وضع ایده جکدر .

دردنجی ماده — هیئت تقشش و اجرا مقرراتی ثلثان آرا ایلده ویریلر . مقررات مذکوره بوتون جمعیتک مطلوبی مقامنده اوله جغندن شعبه مدیرلرندن بدأ ایلده فرقیه داخل اولغه طالب نامزدلره قدر بالجه اخوان و محبانجه مقدس و مرعی الاجرا طوطیه جقدر .

بشنجی ماده — هیئت تقشش و اجرا در سعاده عودت ایدنجیه قدر مرکز و محل اجتماعی ایستدیکی بلده یه نقل ایده بیله جکدر .

آلتنجی ماده — پارس مجلس اداره سی هیئت تقشش و اجرا نك تشکیکی دقیقه سندن اعتباراً وکالت صفتی غائب ایدوب هیئت مذکوره یه تابع بر شعبه مجلسی مقامنده قاله جقدر .

یدنجی ماده هیئت تقشش و اجرا یالکر استانبول مجلس اداره مرکزیه سی اوکنده مسئول اولوب مرکزک قرار یله عزل و تبدیل اولونه بیله جکدر . سکرنجی ماده — اداره نك انتظامی تأمین ایتک اوزره رئیس هیئتک موافقتیه کندیسنه بر معاون آله بیله جکدر . بومعاون رئیسک حاضر بولندی اجتماعده یالکر استشاره حقنه مالک اولوب رئیسک غایبسنده مقامنه قائم اوله جقدر .

اکثریت آرا ایلده ویریلن بالاده کی قرار موجبجنه انتخاب اجرا اولمش واک زیاده رأی قزانش اولان درت ذات طرفندن هیئت تقشش و اجرا تشکیکل ایدلشدر . هیئت تقشش و اجرا دخی اکثریت آرا ایلده مراد بک افندیی رئیس انتخاب ایدلشدر .

بناء علیه اخوان و محبانه اعلان اولتورکه احوال وطن جمعیتک ایشای وظیفه ایتسنی داعی براده و خامته کلش اولدیغندن اطراد حرکات ایچون لازم کلان انتظام معاملاتی تأمین ایتک مقصدیه اختیار اولتان شو اجراءات حسن قبول اولتورق هیئت اجرادن تبلیغ اولتورق مقررات رسمیه واجب الاجرا مطلوب ملت نظریه باقایلدرلر .

### بیان نامه

عثمانلیلر !

اتحاد و ترقی جمعیتی بر جمعیت فسادیه دکلدور . بالعکس وطنک سلامت و سعادت اوغورنده کندی سلامت ذاتیه لرینی بیله فدا ایتش ارباب غیرت و حمتدن مرکبدر . املی بکدر ، یحیدر .

یوم تشکلندن آز بر زمان کچمش ایکن رسماً دفتره اسمارینی قید ایتدن اخوانک عددی اولسکر بیکی تجاوز ایتشدر . محبانه کلنجه بومیانه داخل دکم دیه بیله جک ادراک و مزیت صاحبی بر عثمانلی تصور ایدمه یز .

مقصدمن سلامت دولت و خلافتدر . بونلرک تهله کده اولدیغنی آکلاماش بر یکسه قالمشدر . عالمک مطبوعاتی شویله طورسون ، مجالس رسمیه ده کرسی خطابتارده ، یاخود رسمی نوطه لرده بیله حیثیت شکنانه صورته اسلامیت و عثمانلیق نام و شاننه تجاوز ایدیورلر .

مسلمانلق و عثمانلیق نام و حقوقی محافظه ایدمه جک بر حکومت یوق . ایش یالکر بونده بیله قالیوب انوام و حقوقک یامال ایدلسنه باشلیجه سبب اولانلر حکومت عنواتی طاشمقدن صیقلیمان بر سوری مجنونلر ایلده ارباب احتکاردن عبارتدر .

عثمانلیلر ! خلافت و دولت کی بر برین مقدس اولان ایکی امانت حلیله نك شیو صورتیه طالع مسخره سی اوله برق بر یوزندن غائب اوله سنه باقوب طورده جقمسکر ؟

بلکه دونه قدر جمله کر مسئول اولوب یالکر ریاستده بولتان مسئول ایدی . بونکون حقیقت سنین ایتدی . شبه و رده محل قالدی . دولت و خلافت کیدیور . امت بویله جه وظیفه سز طورورسه خلاصه چاره بولونماز .

جمعیتک ارکانی استخلاصده علاقه دار بولتان خلیفه و پادشاه طرفندن اختیار اولتان اجراءات رسمیه واسطه سیله استحصالی حیة و عبودیه ترجیح ایلده ابتدا کندوسنه قدیم اولتان لایحله لره تهله کی خبر ویره رک ضمناً اولوالامری وظیفه ده دعوت ایتک ایستدیلر . فائده کورلینجه بالجه حرمانه و خصوصی تصایح و مطالب درجه لرینی تجربه دن صوکره علناً نشر یاته قدر واردیلر .

تهله کی قبل الوقوع خبر ویرمشلردی . اووقت پادشاهمزه عقلی اریوب مبالغه یه ، یاخود فساده حمل اتش ایدی دنلورسه مؤخرأ وقوعات مثاله و مهله که صورتسنده تخمینلرمز میدان بولوب شرق و غرب حقمنری تسلیم ایتدکن صوکره دخی بیلدیزک عناد و اصرارده دوائی جنت واهانتدن بشقه برشی ایلده تاویل اولتومیور .

میدان یوقدرکه بوکاده سکوت ایدلم . یا ایشای وظیفه ایتلی یز . یاخود بیلهرک دولت و خلافتک محو و تخریب کی بر جرم عظیمک مسئولیتنه اشتراک ایتکه راضی اولملی یز .

دولت عثمانیه نك ظهورندن اول مجاهدین اسلامیه سلامت خلافتی هرشیدن اقدس طوطیقلری کی ظهورندن صوکره عثمانلیلر دخی دولتک منافعی اوغو رنده پادشاهلرینی وسائر رؤساننی فدا ایتکه تردد اختیارلردی .

بزه انلرک ( خیر الحلف ) لری دکلی یز ؟ یوقسه بزه بیلدیز نشینلره لایق ( شر الحلف ) اولقی راده سنه تنزل ایتش می یز ؟

مطلوب اولان نتیجه قابل اصلاح اولمیانلرک اجرای مضرتدن منع اولنلریدر .

منعاری قابل اولینجه مقاملرندن وقت کچمه دن دفع ایدلیدر .

بوده اوله منجنه شمدی به قدر قبوله تردد ایتدیکمز قیام عمومی کوزه آلایروب ایشای وظیفه

ایتلی یز که عکسکی خالده آله آورچنده برشی قالدقدن بشقه حتی شویمن بیلده اولاد و عیاللرک بریشانلغنی موجب فلاکتلر ایتنده واقع اوله جقدر .

ایشه بر آن اول نتیجه ویرمک اوزره جمعیتمزه قرار واقع اولشدر . اهمیت مسئله یی احاطه ایلهرک قانون دائره سنه عودت ایتکله ابتدا دولت و ملت ایلده کندولرینی قلاکتدن بزی ده وچدا تیره مخالف حرکاتدن منع ایدمه جک اولان اصحاب حکومتک ایلک اول بزم طرفزدن تبریک اولتورقنه شبه ایدلسون . شمدی به قدر اجرا آنده ثانی ایتکلکمز چاره سز

برابر یشایه جیمز ارمینلره برلشوب اختلال حالتدن استفاده اندن ارباب شرک اولاد وطنی یکدیگرینه قارشو سوق ایدوب استفاده ایتلرینی منع ایتک مقصدینه مبتنی ایدی . ارمینی و طنداشلر مزه برقمسینک چوق شیلره مستعد اولدق لرینی کوسترد کاری حالد عثمانلی غیرت کشی اوله بیلیمک آثارینی هنوز کوستره مدیلر . حرکتلرینی خاطر ایچون غفلته حل ایلده کندولرینی عفو ایدرز . لکن وطنک بقاسندن بشقه برشی دوشونمکیمزین هرچه باد آبد حرکت ایتک خصوصنی کیمسه ایچون ارتق فدا ایدمه یز .

بیلدیز آثارلری ارمینلره قارشو مسلمان صافد لارینی سؤاستعمال ایتدیلر . بقالم ایافلا تیش بتون امته و حکومتی قانون دائره سنه دعوتیه حرکت ایدمه جک اردولره کییی قویه جقدر ؟

ارباب بصیرتی ارتق غفلتدن واز کچمکه خالصانه دعوت ایتکه برابر هر حال و کارده التزام ایتدیکمز مقصدک قدسیته بناء توقیقات صمدانییه استناد و توکل ایلده حرکت ایدمه جکر .

### هیئت تقشش و اجرا

### مکاتیب و ادبیات

### استانبولدن

فلک قهرینی بولمت ایچون تزیید ایدیور . بونه حال مصیبت انکیز . ینه ظلمه زراعت باقه سندن بش احرار ملتی خچئه استبداننده ایکه تیور . اون ایکی طلبة بحر یه ده زکی پاشا ملعوننک استطاعتده بولنیور .

کچن هفته تقدیم ایلدیکم حقیقت نامه یی شمدی ده شو پریشان سوزلر تعقیب ایدیور . نه یازمه جعی بیله میورم .

استانبولک بوارالق احوالی بک دهشتلی ! امید ایدرمکه قینده بک بیوک بر انقلاب ظهور ایدمه جکدر . کوریشدیکم طلبة علوم و علمای دین یاواش یاواش وعظ و نصیخته باشلیورلر . اهالی او یانیور .

حتی قایدیلرده !

زیرده یازدیغ شید مدحت پاشا « رحمة علیه » ک برمکتوب حقیقت اسلوبی طرف عالیکوه کوندرلک اوزره هنوز اون سکرک باشنده بر دختر اصالت و حیتپرور طرفندن بک ویرلشدر . با فکر ملت پرور وطن قربانی مدحت مرحوم نه دیور ؟

( الله جمله سنک بلاسنی ویرسون . بقای جاه ایچون هر ذاتی اختیار ایدیورلر . بویله هیئت بویله دولت اولماز . عاللمره مسخره اولدق ؛ بزه کولیو رلر .

روسیه نك ضبط ایتدیکنی ایستیمان دولتلر شمدی عکسکی ایستیورلر . بو آرزوسنه قریباً موفق اولمسی ایچون طرف طرف چالشیورلر . « فاعتبروا یا اولی الابصار ! »

بزم دولت ایچون روسیه نك پولتیقه سی قریم خانلرینه قوللان دینی پولتیقه در . تاریخچه مراجعت اولتورسه اکلاشیور . اناطولیده روم ایلیده کوچک کوچک اختلاللر حصارده حق و خرسیتانلر محاربه یه قالدیشوب بوجمله ممالک عثمانیه یه عسکر سوق ایدمه جک . ایشته بوزمان قریب ایتدی . نه وقت اوتنده بری ده اختلال ظهور ایتکه باشلارسه معلوم اولسون که دولتک اضمحلالیده جوق کچمز . هان جناب محو الاحوال ملته آجیسونده شو حال حسن حاله تحویل ایتسون . یوقسه حال بومنوال اوزره در . « کورده نك عادت و نه مه لازم سوزی » ایشته بورایی ویرر . باقلم خلق حالای او بویه حق هیئات دولت حب وجاه ایچون قوس ، قوجه ملتی و مملکتی فدا ایدیور . و بزم ایی خلقمز : « یاری ! صاحبنی کوندر ! » دیه سمدن حضرت عیسانک نزولنی دهان کشاده اوله رق بکلیورلر . بی چاره لر ! بیلیمو .

رلر قره قوش نچه سی آتله مهیدین ، عیسان دها بقندر . بر کره نچه سی آودلرینه طاقارسه بردها او آغزندن خیر قالماسز . او وقت کورلرکه سمدن مانده بکلان ساده دلان حکم قره قوشی ایلده قره قوش نچه سنده یار دلیرلر . ایواه ! دیرلر اما چه فائده ! ... هان جناب الله ایمان سلامتی ویرسون دیرده ختم کفتار ایلرم .

دیدکلری قیقدی ! بزه الزم اولان ثبات و غیرتدر ...

### روم ایلیدن

وطن مقدس بر وجوددر که آنک اعصاب مؤثره سی . ملتدر . اعصاب نه قدر قوی و حسس اولورسه

وجودنده آثار واذواق حیاتیه سی بالطبع اوقدر بولنده اولور . سلطان حمید وطنک وجود مقدسه ندان سیتائیه بیوک بریاره آجش ؛ بر طاقم خسرات مضرتدن عبارت اولان عونیه سی ده اومدهش یارمه نك میقرو بلرینی تشکیل ایدهرک جریحه یی یکرمی سنه دن بری بیولتدکجه بیولتشلر ؛ نهایت بو حال اسف اشتاله کتیرمشلردر . او وجود مقدسک اعصابی اولان ملت یارمه نك انواع آلام و اضطرابات طاققر ساسنه کور کورینه تحمل ایدهرک سنی حیقار ماش !! درمانسز ، ضعیف دوشمش ؛ خارچدن دهها بر جوق امراض وطنک نازک بدننه مستولی اولمش ! زواللی ملت ! بونه قدر مسکنت ؛ همت ، صوکه دفعه اوله رق غیرت ایدیکر ، اوزر کره چوکن آغزلانی آتیکر ، قالدیکر ! ... وطنک ارباب وجدان و حمتدن مرکب اولان طیبیلرینه صولوق و مضطرب معافیله رقت آور چهره لر کرله مراجعت ایدیکر . مسئولکر حسیله فداکارانه بر صورتده اسعاف اولور . سلطان حمیدک قورقوغ دیشلری قریبلر . یاره ؛ ادویه مؤثره سیاسه واسطه سیله میقرو بلردن تمیزلهرک عونیه خونریز ، خسراتلر ایچنده بر اقیلیر . کوزیکری آچوب دقله باقکر ! وطن استبداد آتشلری ایچنده یانوب کول اولیور . وطن وفات ایدیور . محو اولیور . الله ایچون اولسون بوکا تحمل آتیکر . وطنک احیاسنه قوشکر . بیلیمسکرکه ؛ خلیفه رسول الله دیه طانیوب تقدیس ایتک ایستدیکر سلطان حمیدک نحدارانی ، خونریزلیک ، اسمارینی تاریخلرده نقرتله او قودیگر جنیکلری ، هلاکولری یانسنده ارباب وجداندن براقه جق درجه یه واردی بوکا اعتماد ایدیکر . زیرا آنلر هیچ اولمزه غدار لقلری ، خونریز لکلریله ملتلرینک اعتلامی شان و شوکتیه چالشدقلری حالد سلطان حمید نچئه ظلم و غدریه ملتک قلبی ، جکری اغزنده چکینور . بناء علیه شو نچئه ظلم و استبداددن قور تولغه چالشمه . وطنک استقبالی قطعاً تأمین ایدلم . تاکه عزت و اقبال و راحت بال عرض چهره لطافت ایتسین .

تخسر ؛ آن آتی وصاله نولور بریول بولنسه انتقاله ؛ او محزون یار ایچون کوزدن این قان بورونسون خند آیتسنده آله آلب آغوشه اول در بیتی کاله ایردین ایرمز زواله جمالی نقشنی دست حقیقت طوتار آینه فکر و خیاله دکل منغایه زیر خاکه آتسه ک



بہ فکر چیتا عرش کالہ  
مثال مہر تابان ضیامن  
نہ غم دوشمزشہ بر پارہ ظلالہ  
بویکس ملتہ اغرب دکدر !  
ایدرسہ جابجا فریاد ونالہ  
او ملت کہ باتیرمق ایستیورسک  
چیتارمش کن سنی اورنک عالہ !  
باشکدہ پارہلسون ! تحت دولت  
اوتانمز ! دیرایسہک دولت بوحالہ  
دنی ! خلقتدہ هیچ دولت اولورمی ؟  
او معنادال علوی برمالہ  
برآرناوود

### اوراق حوادث

حقیقت — ایکی اوچ ہفتہ دہری اسویچرہنک  
جنوہ شہرندہ « حقیقت » عنوانیلہ بر فریاد حیت  
دہا نشر اولونغمہ باشلادی . مدیر ومحرری منور  
فکرلی کنجلمزدن طرسوسی زادہ منیف بکدر .  
« حقیقت » ی وطنداشلمزہ تقدیم ایلر ودوام  
وہباتی تخی ایلرز . حجممن مساعد اولسہ مندرجلہ  
تندن برچوق شیلر نقل ایتمک ایستردک ناچار  
درت نومرولی نسخہسنک « ماضیمزہ بر نظر » سرلوہ  
حلی مقالہسندن برقاچ سطری انظار عبرت وغیرتہ  
عرض ایلہ اکتفا ایلیورز .  
« ... او قدر سودیکمز اسلافک تاریخنہ باقلم :  
انلر اوعلوتی ، سعادتق نصل بولمشلر . بوکون بزی  
برباد ایدن فسادہ نصل قارشی طورمشلردر . برآز  
کوز کردیردیکمز حالہ اکلاہیلورز کہ اسکی اقبالمز ،  
احمای ادانی ، سعی دائمی ایلہ وجود پذیر اولہجقدر .  
اوت ! احمای ادانی برامر شافیدر . بونک ایچون  
تاریخ عالمی دکل ، تاریخ عثمانی تدقیق ایدلم . نہ  
بولہجغز ؟ اوت ! اجدادمز اولہ بر اجداد ایش  
کہ ... ملتہ ، دولتہ ضرری اولان حکمداران و  
اعالییہدہ محو ایتمکی بروظیفہ بیلرلمش . فقط کرک  
حکومتک ملتی اصلاح ایچون قولاندیغی اصول ،  
کرک ملتک اعالییہ تربیہ ایتمکدہ تعقیب ایتمکی  
طریق جزای اعدامدن باشقہ برشی دککش ! »

ولایت غزتلری — والیردن چوغنک دانئدہ ،  
رزالتدہ بر عبدالحیدجک کسیدکلرینی اکلامق ایچون  
ہرولایتدہ منتشر رسمی غزتلرک برر نسخہسنی  
کورمک کفایت ایدر . بونلر مکتوبجیلرک نظارتی  
وبرچوق یرلردہ والیرک بالذات معاینہسیلہ نشر  
ایدلیدی حالہ والیرہ مداح اولمقدن قورتیلہمیور .

بوہفتہ منظورمز اولان « طرابلس غرب » جریدہ  
رسمیہسی بومسلک رزالتدہ الہ ایلری یہ وارمش .  
« سیاحت علیہ حضرت ولایتیہی » نک فی منہ  
تفصیلاتیلہ صحیفہلر طولیدرلمش . والیر ، قوماندانلر  
مملکتک رفہ وسعادت وسلامتی موجب اولہجق  
اسبابی استحضر ایتمک ، قابلیت عمران وترقی رأی  
العین کوروب اجرای ایجابہ توسل ایلمک ، صنایع ،  
زراعت وتجارتی آرتیرہجق اصوللرک تطبیقہ چالشمق  
ایچون معیتدہ فن مأمورلری اولدیغی حالہ دورہ چیقا  
رلر . بعدہ کوردکلرینی ، پادکلرینی اعلان ایلرلر .  
یوقسہ ولایت اغیا واشرافدن علوفہ طویلامق خلکک  
النندن آلہجق دہا نہسی قالدیغی کشف ایتمک ایچون  
سیاحتہ چیقمازلر وچیقارمازلر . ہلہ ( اقشاملین  
شورادہ یادی ، صباحلین بورایہ واردی ) کی مالہ  
یعنائی نشر واعلانہ نصل تأدب ایتمکلرینہ جدآ  
تعجب ایلرز . صلاۃ خمسہنک ادا اولندیغی یومیہ  
ژورنالہ کچیرمک ایسہ والی نک ( عبادتی خالق ایچوہ  
نمی ؟ یوقسہ خلق بیلین دیہمی ادا ایلدیکنہ دائر )  
فکرده شہلر اویندیریور . بقالم بوقومدی دہا  
نہ قدر سورہجک ؟

### ( میزان ) تفرقہسی :

#### وصیتنامہ سیاسی

عثمانی اعظم سیاسیونندن صدر اسبق کیچہجی  
زادہ محمد فواد پاشا مرحومک فرانسنہک بحر سفید  
سواحلدہ کائن « نیس » شہرندہ بولندیغی زمان  
ووفاتندن برقاچ وقت مقدم جنتمکان سلطان عبدالعزیز  
مرحومہ خطاباً یازوب ارسال وتقدیم ایلدیکی  
وصیتنامہ سیاسیدرکہ حیدلری حکمت بک افندی  
طرفندن اہدا اولونغمہ مع المسار عیناً درج ستون  
ایلیورز . (\*)

« پادشاهم

برقاچ کون وبلکہ برقاچ ساعتدن زیادہ عمرم  
یوقدر . بوقالان مدتی دہ بیوک ومقدس بروظیفہنک  
ایفاسنہ حصر ایتمک وصوک افکاریمی یعنی مدت  
مدیدہ خدمت بانکت عاجرانہمک اثمار مرالمذاقنی  
زیر پای سپہر اعتلاسی ملوکانہلرینہ وضع ایلمک  
استرم . رقیمہم پیش نظر ہایونلرینہ قوندیغی  
چندہ قولکر بودار فنادن ال چکمش بولنہجغمدن

(\*) آرقداشلمزدن بعضیلری بووصیتنامہی  
بشقہ برمنبعہ عطف ایتمک ایستیورلرسدہ الیزدہکی  
نسخہ اصلیلہ یہ کورہ پوروایت بی اصل واساسدر .

آرتق بوکرہجک افادائہ حوالہ سمع واعتماد بیوریلہ  
بیلور . دریجہ لحددن چیقان آواز دائعہ صدق  
وصوابدن دمسار اولہکشدن . ید مؤید ہایونلرینہ  
ودیعہ آلہیہ اولان مقام خلافتک شانی کی مخاطراتی  
دخی بیوکدر . وظیفاتی لایقہ ایفا ایتمک ایچون  
ذات ہایونلری غایت بیوک ومکدر برحالہ ہرشدن  
اول وھرکسندن زیادہ واقف وجازم اولیسکرکہ او  
حال آل عثمان دولتک مخاطرہدہ بولمیشدر .

حیرانمزک ترقیات سریعہلری واجدادمزک  
خطیبات غیرموجہلری بوکونکی کوندہ بزی اودرجہ  
بحرانلی برموقعہ القبا ایتمشدرکہ بونک تہلکۂ عظیمہ  
ومبرہسندن قورتلمق ایچون ذات ہایونلری ماسبقہ  
کلیاً قطع رشتہ تعلق ایلہ دولت علیہلری کسب قوای  
جدیدہ جہتہ سوق وتغریب بیورمغہ مجبوردرلر .  
بعض نادان وطنپرورلر وسائط قدیمہ مزلہ شوکت  
قدیمہ مزک قابلیت اعادہسنی ذات شاہانہلرینہ ایستندرمق  
ایستلر . زہی خطای وخیم العاقبہ زہی عفو اولنماز  
خیال ! نعم ، اگر ہمجوارلر مز اجدادمز عصرندہکی  
حالرندہ قلش اولسیدیلر وسائط قدیمہ مزلہ ذات  
ہایونلری اوروپانک مرعی الحکم حکمی اولمقدن  
آسان برشی اولہمز ایدی . اما صد حیفکہ اوروپادہ  
شمیدیکی حیرانمز بوندن ایکی یوز سنہ اولکی  
حالرندہ دکدرلر . ہپسی بردن یوریشلر وایلرویہ  
کیتمشلر وبزی دہ بک کیروودہ براقشلردر .

واقعا بزده یوریدک وشمیدی دولت علیہکر  
اجداد عظاملری عصر وزمانلرندہکی ہیئت حکوہ  
متلرک محروم اولمش اولدکلری اسباب معلوماتہ مالک  
اولدیغندہ شہہ یوقدر . فقط نہ چارہکہ یالکر اسکی  
زمانہ نسبتہ کوریلان شوققوق عصرمزک احتیاجانہ  
وفا ایتمک درجہسنہ واصل اولمغہ دہا چوق مسافہ  
واردر . بوکونکی کوندہ دولت علیہلرینک اوروپا  
قطعہسندہ پایدار اولہ بیلرسی یالکر اسلاف عظاملری  
قوتلرینہ ایریشمک وبلکہ آنلری کچمک دکل ، شمیدیکی  
ہمجوارمزک قوتنہ ایریشمک وبلکہ آنلری کچمکدہ  
انجق حاصل اولہ بیلور . مرادمی دہا زیادہ ایضاح  
ایدرم . دولت علیہکر انکلتزہ قدر قوہ مالیہ  
وفرانسہ قدر علوم ومعارفہ وروسیہ دولتی قدر  
عساکرہ مالک اولمدجہ سلامتدہ اولہمز دیرم .  
بزجہ چوق ترقی یہ برشی دکدر . دولت علیہجہ  
بہمہ حال سائر دول اوروپانک واصل اولمش اولدکلری  
درجہ ترقیاتک حاصل اولسی الزمدر .

مابعدی وار

جنوہدہ طبع اولنمشدر
