# Supplementary material
Source: Research Square preprint supplement (doi:10.21203/rs.3.rs-9653111/v1)
Supplement: Supplementary file 9 [file İstikbal.pdf › Primary Sources/İstikbal.pdf]

# استقنال

۱۳۱۲

آیدو بی دفعه لوندرو ده لایع اولور هادی اولدنی مباحثه و تفرک سلامت و منفعت متعلقه

## امت و امامت

برجماعتک دواجمعی برامام صاحب امرک و جودیه محتاج اولدنی  
بی امامک حکومتی رضی جماعتک روانه موقوفه

خامه بر باد شاهک حکومتی اولدنی آسایه حال بولور من خامه اولور  
ایسه باد شاهده یا کنز حکومت ایده من . دیمک اولور که ایسی طرف  
احتیاج مسئله سنده ماویدر . شوقدر که حاکمیت جماعتک اولدنی  
ایکونه امام امتک ااده نه توفیق حرکتله اجزای عدالت ایتمک  
تبدیلله برینه بر بقعه کیمک ائداری جماعتک الله در . نکه امام  
ایستدکی کی جماعتی تبدیلیه مقدر دکلر

اقامه هو و در با طله توکل اولانه حاکمیتک غصه ترکیب افراوده  
اولانه قونولک اجتماعنه حصول کلر . فردک کندی ائداریه تصرف طبیعی  
کی قوی مجتمه رضی افرادک مجموعه عائد اولدنی سنده اهرامنده هو حاکمیت  
عمومکدر . امت حاکم طبیعی ، بادشاه حاکم فعلیه .

بوکا دلیل شرعی : در بریده اهالیسی اجتماع ایله بنیدنه ظهور  
ایده جنگ دعاوی بی فصلی یکونه بر ذاتی کیدنی نه قضی نصب ایتمک قضای  
صیح اولور من حکم طرف سلطنته منصوب اولانه قضی به عائد اولور چونکه  
قضا حاکمیتک مقیدر . فقط بریده اهالیسی اجتماع ایله بر ذات سلطنت  
دیا خلافت یکونه عقد بیعت ایتمک اوزات سلطانه دیا خلیفه اولور ائد  
اولکی سلطانه دیا خلیفه تک هیچ حکم قائلر چونکه امامت امتک مقیدر .  
هو حاکمیت مرتب اولانه وظیفه لری عمومک بالذات اجماعه امکان  
مساعد اولدنی سنده تبعیه امام و تشکیل حکومت ضروری ائد اولور .

افراد امتی هاله و مال دنیا جوری خصوصیه منسلط اختیار نه قایه  
و کیدنی هو وعدل اوزده اولور ائدنی بر قوه منظمه بر لوم طبیعی  
اولدنی و بولور بر قوه کلیه کی ائدنی بر قوه منسلطه اسباب سلطنته  
احتیاج کورنیک سیدر . اصل حاکمیت توکل و کور حکومت اوزده شکل  
ایتمدر . بولور تشکیل اجماعی اهالی برره کلوب ایتمدرنه برینه  
: بری عدل و هفایت ائدنی و هاله و مال دنیا سوری و حرکات محافظه

ایده جنگ برکنداره محتاج بر ایسه یکونه سی مناسب کوردک شورش اولور  
اداره حکومتی ایدر ائد برده سنک امر و نه یکم اطاعت ایدر . و بولور سنک  
اجزای اولور من کما شوقدر کیسه آیه و برور دیمک باد شاهده بر تکلیف  
و شرطی قبول ایتمدر . بوجهتم بتم سنده اطاعت امر بادشاهک حق  
اولدنی کی بادشاهی و طائف شوقدر حکومته مغایر حرکتنه منع ایمک  
و عناد دهراری تغییر سنده تبدیلیمک رضی بتمک مقیدر .

بادشاه مصالح عمومی بر رویت اداره یکونه امتک انتخابه تبعیه اولور  
موظف بر مقرر در . حضرت فخر رسالت امور عامه ده مسوولی مطلقه طریقی  
بادشاهیم بیغی بر مقرر کی تغییر ایتمدر .

بادشاهک سارساندر نه فیه و قضایه یا کنز برام اعتبار ایدر  
ائدره سارلری کی طوعار و عاقبت طراغ کیر ، بیر ، ایجر ، اوچور ،  
ختر اولور . هرايشنده بر آدم محتاجدر . فقط اوزر نه بر کوه مختاره  
حکومت اوزر که آیدو لورم و حقوقه سلطتی اجا ایچونه بتم سنک دست انتخاب  
و بیغی اکا ایتمدر . همه زمانه اولعت اتم سنده انواریه بیغی بر آدم  
قایلر .

میلوندر نه مرکب اولانه بر جمعیته مال و جاندری ایدرک بادشاهک  
دیده و سلطنته و مردونه خدمت و مطاوعت ایدور . خزینه بر کینه قیام  
اهالی و برور بادشاهک مفتی خزینه ده جیفور بدکی یملک کیدکی  
ایسه اولور دنی ساری کوندری و بدیه و ذات ایسی ارفات بونه  
خزینه تک یعنی اهالیستک فی سینه یا بیلور . محابه لوده ختم ختم لور تک  
اولانه عکریه اهالیستک جکر باره سی اولوریدر .

میلوندر نه خامه کیدنی بر ترتیب ایدر و وظیفه ایته بولور کار ائدره  
بو اطاعتله مع زیاده ایفاده قهر ایچور ! بوکا مقابل مجبا بادشاه  
عموم طرفنده تودیع اونیانه و وظیفه حکومتی شرایط معینه بر توفیقاً اجا ایدور  
اجرای اقتداری ، خلقت اعمادینه ، احترامه ، اطاعتنه تحقیق و رسید  
مسئله تک بوجه رضی ایدروده تدقیق اولور .
